# Supplementary material
Source: MDPI journal article supplement (https://www.mdpi.com/1422-0067/22/24/13391)

# checkCIF/PLATON report

Structure factors have been supplied for datablock(s) Zh361

THIS REPORT IS FOR GUIDANCE ONLY. IF USED AS PART OF A REVIEW PROCEDURE FOR PUBLICATION, IT SHOULD NOT REPLACE THE EXPERTISE OF AN EXPERIENCED CRYSTALLOGRAPHIC REFEREE.

No syntax errors found.      CIF dictionary      Interpreting this report

## Datablock: Zh361

---

|                 |                          |                                       |
|-----------------|--------------------------|---------------------------------------|
| Bond precision: | C-C = 0.0091 Å           | Wavelength=0.71073                    |
| Cell:           | a=11.4609(12)            | b=18.020(2)      c=19.186(3)          |
|                 | alpha=112.896(7)         | beta=100.698(8)      gamma=101.699(5) |
| Temperature:    | 296 K                    |                                       |
|                 | Calculated               | Reported                              |
| Volume          | 3417.3(8)                | 3417.2(8)                             |
| Space group     | P -1                     | P -1                                  |
| Hall group      | -P 1                     | -P 1                                  |
| Moiety formula  | C8 H21 B12 N2, C16 H36 N | ?                                     |
| Sum formula     | C24 H57 B12 N3           | C24 H57 B12 N3                        |
| Mr              | 517.45                   | 517.44                                |
| Dx,g cm-3       | 1.006                    | 1.006                                 |
| Z               | 4                        | 4                                     |
| Mu (mm-1)       | 0.053                    | 0.053                                 |
| F000            | 1128.0                   | 1128.0                                |
| F000'           | 1128.23                  |                                       |
| h,k,lmax        | 14,23,24                 | 14,23,24                              |
| Nref            | 15690                    | 15532                                 |
| Tmin,Tmax       | 0.981,0.998              |                                       |
| Tmin'           | 0.979                    |                                       |

Correction method= Not given

Data completeness= 0.990      Theta(max)= 27.498

R(reflections)= 0.0891( 4265)      wR2(reflections)= 0.2784( 15532)

S = 0.903      Npar= 769

---

The following ALERTS were generated. Each ALERT has the format  
**test-name\_ALERT\_alert-type\_alert-level.**  
Click on the hyperlinks for more details of the test.

---

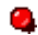**Alert level A**

PLAT026\_ALERT\_3\_A Ratio Observed / Unique Reflections (too) Low .. 27% Check

**Author Response: Small crystal.**

PLAT910\_ALERT\_3\_A Missing # of FCF Reflection(s) Below Theta(Min). 57 Note

**Author Response: Closed by beamstop.**

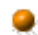**Alert level B**

PLAT234\_ALERT\_4\_B Large Hirshfeld Difference C12 --C13 . 0.27 Ang.  
 PLAT234\_ALERT\_4\_B Large Hirshfeld Difference C13 --C14 . 0.28 Ang.

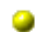**Alert level C**

PLAT084\_ALERT\_3\_C High wR2 Value (i.e. > 0.25) ..... 0.28 Report  
 PLAT202\_ALERT\_3\_C Isotropic non-H Atoms in Anion/Solvent ..... 1 Check  
                   C54A  
 PLAT221\_ALERT\_2\_C Solv./Anion Resd 3 C Ueq(max)/Ueq(min) Range 4.4 Ratio  
 PLAT223\_ALERT\_4\_C Solv./Anion Resd 3 H Ueq(max)/Ueq(min) Range 5.5 Ratio  
 PLAT223\_ALERT\_4\_C Solv./Anion Resd 4 H Ueq(max)/Ueq(min) Range 4.6 Ratio  
 PLAT230\_ALERT\_2\_C Hirshfeld Test Diff for C33 --C34 . 6.6 s.u.  
 PLAT230\_ALERT\_2\_C Hirshfeld Test Diff for C63 --C64 . 5.6 s.u.  
 PLAT234\_ALERT\_4\_C Large Hirshfeld Difference C32 --C33 . 0.17 Ang.  
 PLAT234\_ALERT\_4\_C Large Hirshfeld Difference C41 --C42 . 0.16 Ang.  
 PLAT241\_ALERT\_2\_C High 'MainMol' Ueq as Compared to Neighbors of C83 Check  
 PLAT242\_ALERT\_2\_C Low 'MainMol' Ueq as Compared to Neighbors of C3A Check  
 PLAT242\_ALERT\_2\_C Low 'MainMol' Ueq as Compared to Neighbors of C11 Check  
 PLAT242\_ALERT\_2\_C Low 'MainMol' Ueq as Compared to Neighbors of C12 Check  
 PLAT242\_ALERT\_2\_C Low 'MainMol' Ueq as Compared to Neighbors of C21 Check  
 PLAT242\_ALERT\_2\_C Low 'MainMol' Ueq as Compared to Neighbors of C31 Check  
 PLAT242\_ALERT\_2\_C Low 'MainMol' Ueq as Compared to Neighbors of C52 Check  
 PLAT242\_ALERT\_2\_C Low 'MainMol' Ueq as Compared to Neighbors of C61 Check  
 PLAT242\_ALERT\_2\_C Low 'MainMol' Ueq as Compared to Neighbors of C63 Check  
 PLAT242\_ALERT\_2\_C Low 'MainMol' Ueq as Compared to Neighbors of C71 Check  
 PLAT242\_ALERT\_2\_C Low 'MainMol' Ueq as Compared to Neighbors of C73 Check  
 PLAT242\_ALERT\_2\_C Low 'MainMol' Ueq as Compared to Neighbors of C82 Check  
 PLAT260\_ALERT\_2\_C Large Average Ueq of Residue Including N3 0.145 Check  
 PLAT260\_ALERT\_2\_C Large Average Ueq of Residue Including N4 0.108 Check  
 PLAT331\_ALERT\_2\_C Small Aver Phenyl C-C Dist C3 --C8 . 1.37 Ang.  
 PLAT331\_ALERT\_2\_C Small Aver Phenyl C-C Dist C3A --C8A . 1.37 Ang.  
 PLAT340\_ALERT\_3\_C Low Bond Precision on C-C Bonds ..... 0.00906 Ang.  
 PLAT360\_ALERT\_2\_C Short C(sp3)-C(sp3) Bond C13 - C14 . 1.42 Ang.  
 PLAT420\_ALERT\_2\_C D-H Without Acceptor N1 --H1B . Please Check  
 PLAT906\_ALERT\_3\_C Large K Value in the Analysis of Variance ..... 14.314 Check  
 PLAT906\_ALERT\_3\_C Large K Value in the Analysis of Variance ..... 2.401 Check  
 PLAT911\_ALERT\_3\_C Missing FCF Refl Between Thmin & STh/L= 0.600 27 Report

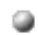**Alert level G**

PLAT002\_ALERT\_2\_G Number of Distance or Angle Restraints on AtSite 22 Note  
 PLAT007\_ALERT\_5\_G Number of Unrefined Donor-H Atoms ..... 4 Report  
 PLAT168\_ALERT\_4\_G The CIF-Embedded .res File Contains EXYZ Records 3 Report  
 PLAT171\_ALERT\_4\_G The CIF-Embedded .res File Contains EADP Records 3 Report  
 PLAT176\_ALERT\_4\_G The CIF-Embedded .res File Contains SADI Records 1 Report  
 PLAT300\_ALERT\_4\_G Atom Site Occupancy of C23A Constrained at 0.5 Check

|                   |                                                  |                |           |             |
|-------------------|--------------------------------------------------|----------------|-----------|-------------|
| PLAT300_ALERT_4_G | Atom Site Occupancy of C23B                      | Constrained at | 0.5       | Check       |
| PLAT300_ALERT_4_G | Atom Site Occupancy of C24A                      | Constrained at | 0.5       | Check       |
| PLAT300_ALERT_4_G | Atom Site Occupancy of C24B                      | Constrained at | 0.5       | Check       |
| PLAT300_ALERT_4_G | Atom Site Occupancy of C43A                      | Constrained at | 0.5       | Check       |
| PLAT300_ALERT_4_G | Atom Site Occupancy of C43B                      | Constrained at | 0.5       | Check       |
| PLAT300_ALERT_4_G | Atom Site Occupancy of C44A                      | Constrained at | 0.5       | Check       |
| PLAT300_ALERT_4_G | Atom Site Occupancy of C44B                      | Constrained at | 0.5       | Check       |
| PLAT300_ALERT_4_G | Atom Site Occupancy of H23A                      | Constrained at | 0.5       | Check       |
| PLAT300_ALERT_4_G | Atom Site Occupancy of H23B                      | Constrained at | 0.5       | Check       |
| PLAT300_ALERT_4_G | Atom Site Occupancy of H23C                      | Constrained at | 0.5       | Check       |
| PLAT300_ALERT_4_G | Atom Site Occupancy of H23D                      | Constrained at | 0.5       | Check       |
| PLAT300_ALERT_4_G | Atom Site Occupancy of H24A                      | Constrained at | 0.5       | Check       |
| PLAT300_ALERT_4_G | Atom Site Occupancy of H24B                      | Constrained at | 0.5       | Check       |
| PLAT300_ALERT_4_G | Atom Site Occupancy of H24C                      | Constrained at | 0.5       | Check       |
| PLAT300_ALERT_4_G | Atom Site Occupancy of H24D                      | Constrained at | 0.5       | Check       |
| PLAT300_ALERT_4_G | Atom Site Occupancy of H24E                      | Constrained at | 0.5       | Check       |
| PLAT300_ALERT_4_G | Atom Site Occupancy of H24F                      | Constrained at | 0.5       | Check       |
| PLAT300_ALERT_4_G | Atom Site Occupancy of H43A                      | Constrained at | 0.5       | Check       |
| PLAT300_ALERT_4_G | Atom Site Occupancy of H43B                      | Constrained at | 0.5       | Check       |
| PLAT300_ALERT_4_G | Atom Site Occupancy of H43C                      | Constrained at | 0.5       | Check       |
| PLAT300_ALERT_4_G | Atom Site Occupancy of H43D                      | Constrained at | 0.5       | Check       |
| PLAT300_ALERT_4_G | Atom Site Occupancy of H44A                      | Constrained at | 0.5       | Check       |
| PLAT300_ALERT_4_G | Atom Site Occupancy of H44B                      | Constrained at | 0.5       | Check       |
| PLAT300_ALERT_4_G | Atom Site Occupancy of H44C                      | Constrained at | 0.5       | Check       |
| PLAT300_ALERT_4_G | Atom Site Occupancy of H44D                      | Constrained at | 0.5       | Check       |
| PLAT300_ALERT_4_G | Atom Site Occupancy of H44E                      | Constrained at | 0.5       | Check       |
| PLAT300_ALERT_4_G | Atom Site Occupancy of H44F                      | Constrained at | 0.5       | Check       |
| PLAT302_ALERT_4_G | Anion/Solvent/Minor-Residue Disorder (Resd 3 )   |                | 24%       | Note        |
| PLAT302_ALERT_4_G | Anion/Solvent/Minor-Residue Disorder (Resd 4 )   |                | 12%       | Note        |
| PLAT412_ALERT_2_G | Short Intra XH3 .. XHn H21A ..H24F .             |                | 2.13 Ang. |             |
|                   | x,y,z =                                          | 1_555          | Check     |             |
| PLAT412_ALERT_2_G | Short Intra XH3 .. XHn H41A ..H44E .             |                | 2.14 Ang. |             |
|                   | x,y,z =                                          | 1_555          | Check     |             |
| PLAT412_ALERT_2_G | Short Intra XH3 .. XHn H51A ..H54F .             |                | 2.00 Ang. |             |
|                   | x,y,z =                                          | 1_555          | Check     |             |
| PLAT414_ALERT_2_G | Short Intra D-H..H-X H2C ..H5A                   |                | 2.10 Ang. |             |
|                   | x,y,z =                                          | 1_555          | Check     |             |
| PLAT415_ALERT_2_G | Short Inter D-H..H-X H1C ..H4 .                  |                | 2.07 Ang. |             |
|                   | x,y,z =                                          | 1_555          | Check     |             |
| PLAT720_ALERT_4_G | Number of Unusual/Non-Standard Labels .....      |                | 8         | Note        |
| PLAT860_ALERT_3_G | Number of Least-Squares Restraints .....         |                | 55        | Note        |
| PLAT883_ALERT_1_G | No Info/Value for _atom_sites_solution_primary . |                |           | Please Do ! |
| PLAT912_ALERT_4_G | Missing # of FCF Reflections Above STh/L= 0.600  |                | 76        | Note        |
| PLAT933_ALERT_2_G | Number of OMIT Records in Embedded .res File ... |                | 3         | Note        |
| PLAT941_ALERT_3_G | Average HKL Measurement Multiplicity .....       |                | 2.0       | Low         |
| PLAT978_ALERT_2_G | Number C-C Bonds with Positive Residual Density. |                | 1         | Info        |

---

2 **ALERT level A** = Most likely a serious problem - resolve or explain  
 2 **ALERT level B** = A potentially serious problem, consider carefully  
 31 **ALERT level C** = Check. Ensure it is not caused by an omission or oversight  
 47 **ALERT level G** = General information/check it is not something unexpected

1 ALERT type 1 CIF construction/syntax error, inconsistent or missing data  
 29 ALERT type 2 Indicator that the structure model may be wrong or deficient  
 10 ALERT type 3 Indicator that the structure quality may be low  
 41 ALERT type 4 Improvement, methodology, query or suggestion  
 1 ALERT type 5 Informative message, check

---

It is advisable to attempt to resolve as many as possible of the alerts in all categories. Often the minor alerts point to easily fixed oversights, errors and omissions in your CIF or refinement strategy, so attention to these fine details can be worthwhile. In order to resolve some of the more serious problems it may be necessary to carry out additional measurements or structure refinements. However, the purpose of your study may justify the reported deviations and the more serious of these should normally be commented upon in the discussion or experimental section of a paper or in the "special\_details" fields of the CIF. checkCIF was carefully designed to identify outliers and unusual parameters, but every test has its limitations and alerts that are not important in a particular case may appear. Conversely, the absence of alerts does not guarantee there are no aspects of the results needing attention. It is up to the individual to critically assess their own results and, if necessary, seek expert advice.

### **Publication of your CIF in IUCr journals**

A basic structural check has been run on your CIF. These basic checks will be run on all CIFs submitted for publication in IUCr journals (*Acta Crystallographica*, *Journal of Applied Crystallography*, *Journal of Synchrotron Radiation*); however, if you intend to submit to *Acta Crystallographica Section C* or *E* or *IUCrData*, you should make sure that full publication checks are run on the final version of your CIF prior to submission.

### **Publication of your CIF in other journals**

Please refer to the *Notes for Authors* of the relevant journal for any special instructions relating to CIF submission.

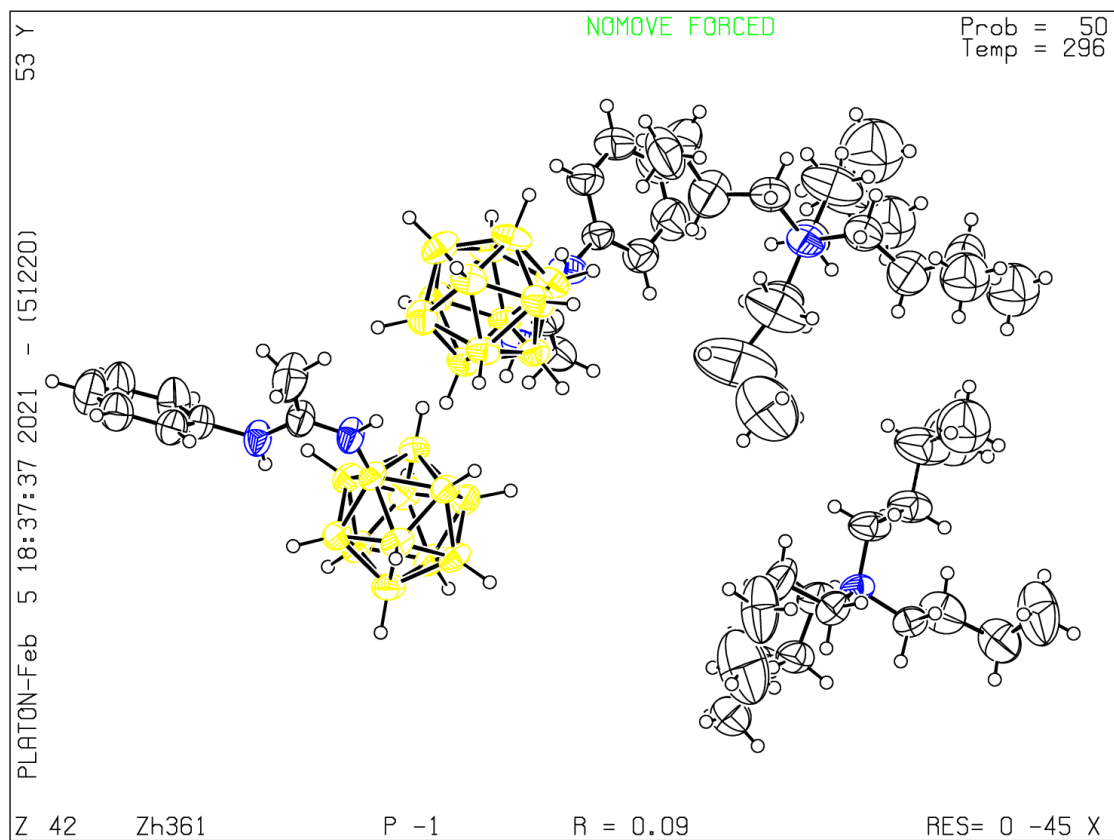

Supplement: s1 [file s1]
