# Supplementary material for: Primary Amine Nucleophilic Addition to Nitrilium Closo-Dodecaborate [B12H11NCCH3]−: A Simple and Effective Route to the New BNCT Drug Design
Source: MDPI journal article supplement (doi:10.3390/ijms222413391), 2021-12-13
Supplement: s1 [file s1]

# Supplementary Material

## 1. Experimental setup for preparation of $(\text{NBu}_4)[\text{B}_{12}\text{H}_{11}(\text{NCCH}_3)]$ .

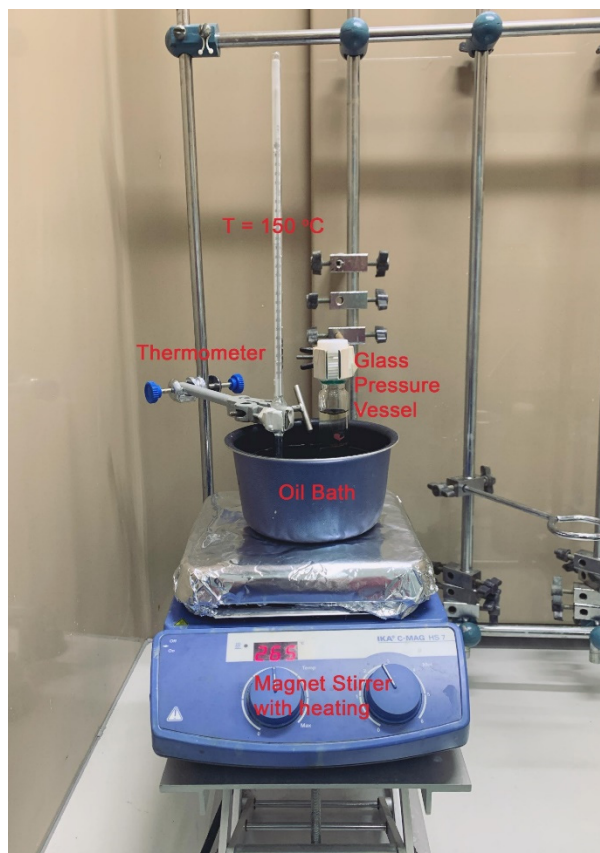

Reaction mixture after synthesis.

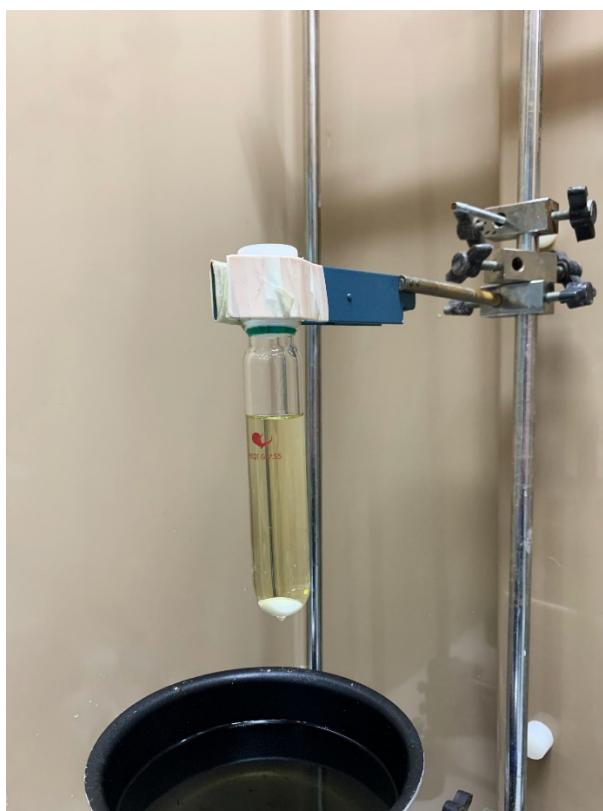

## Spectral data for synthesised compounds.

### $^{11}\text{B}\{^1\text{H}\}$ NMR spectrum $(\text{NBu}_4)[\text{B}_{12}\text{H}_{11}(\text{NCCH}_3)]$ 2.

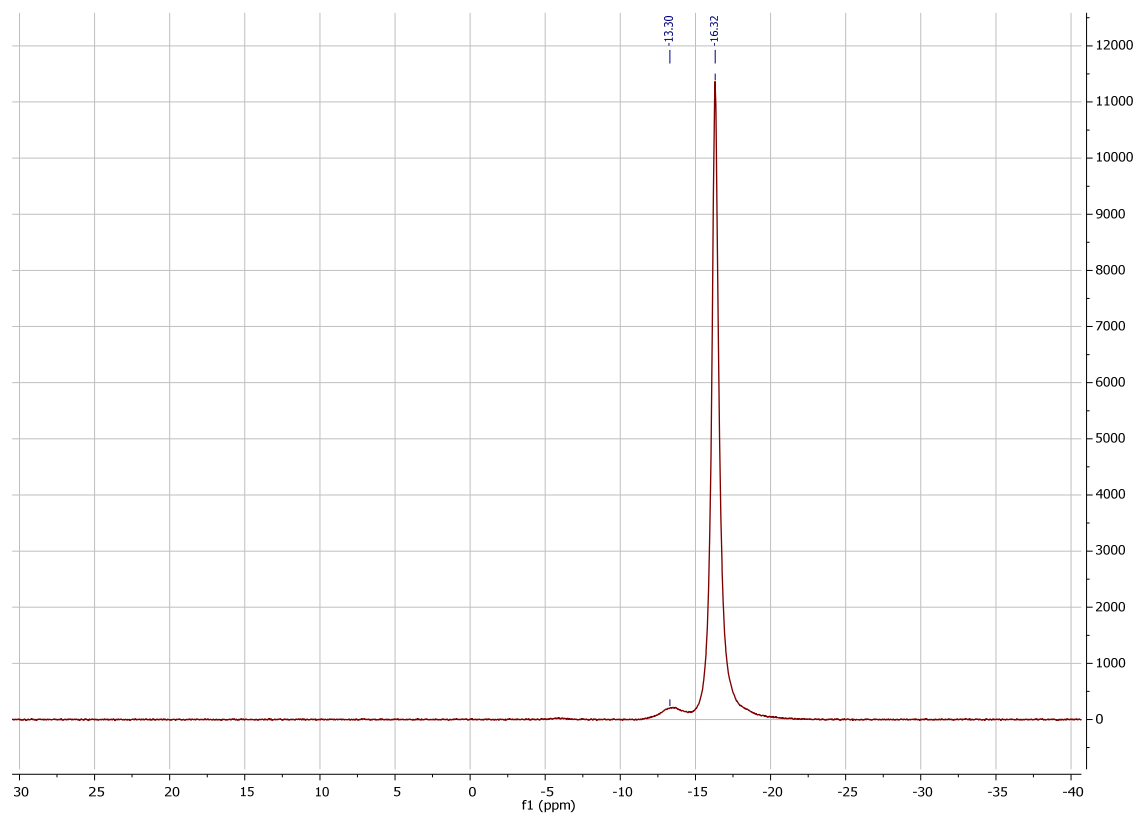

### $^1\text{H}$ NMR spectrum $(\text{NBu}_4)[\text{B}_{12}\text{H}_{11}(\text{NCCH}_3)]$ 2.

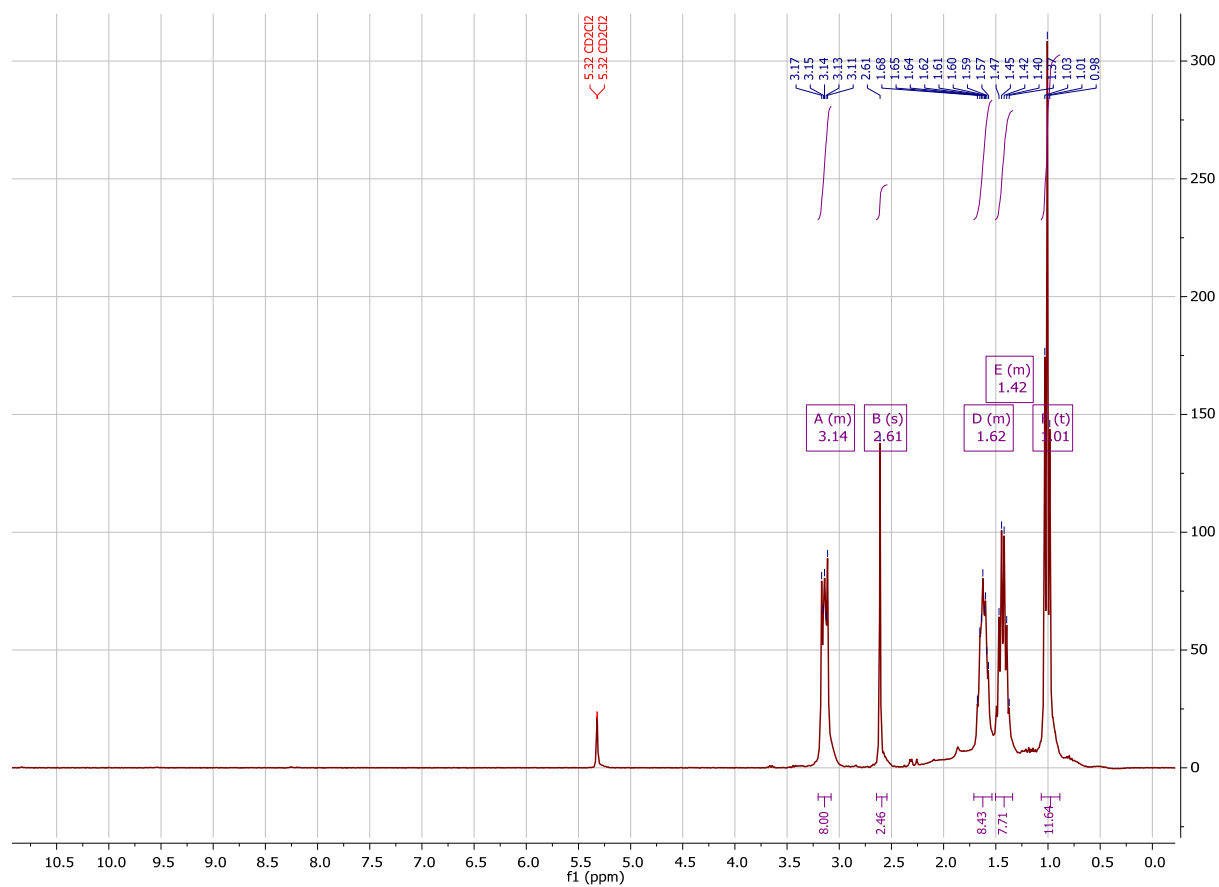

**$^{13}\text{C}$  NMR spectrum ( $\text{NBu}_4$ )[ $\text{B}_{12}\text{H}_{11}(\text{NCCH}_3)$ ] 2.**

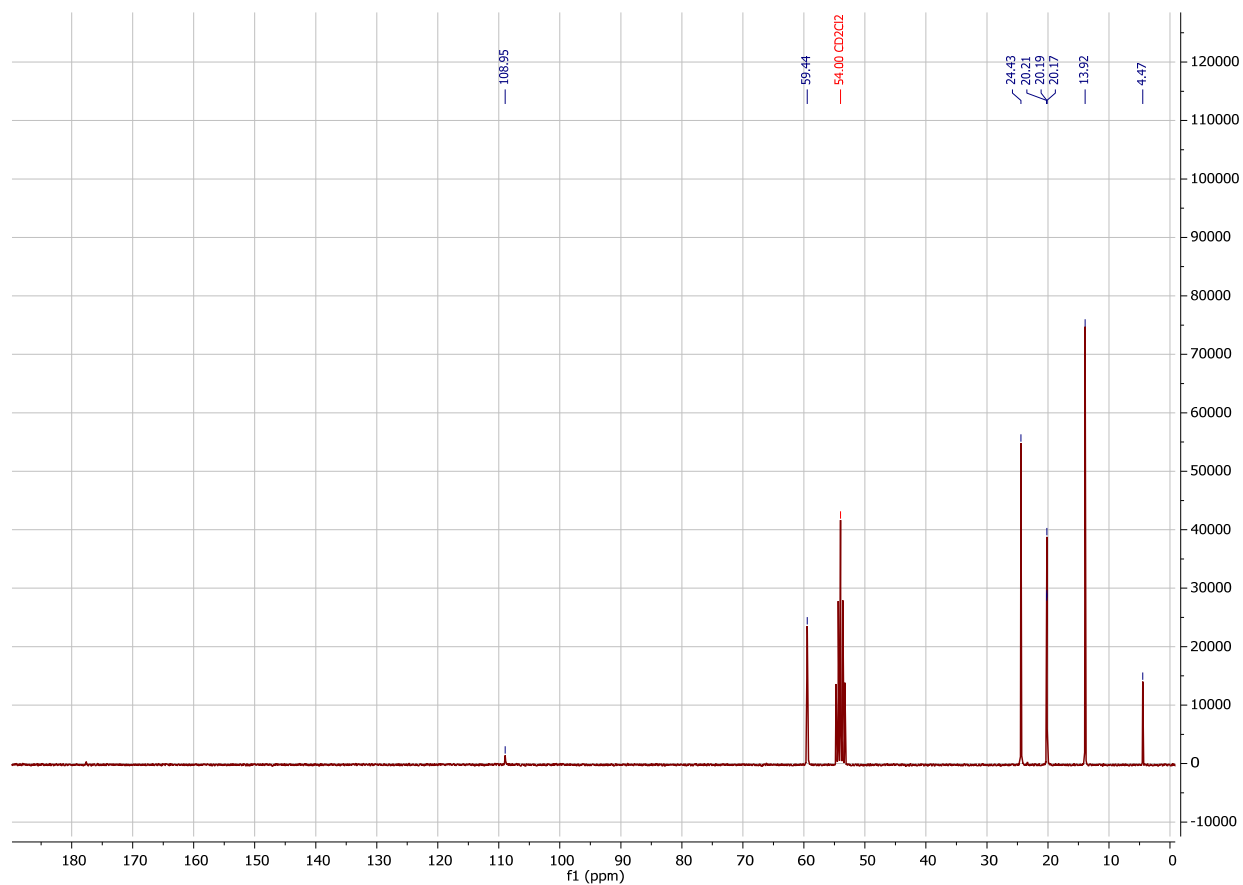

**ESI-MS spectrum ( $\text{NBu}_4$ )[ $\text{B}_{12}\text{H}_{11}(\text{NCCH}_3)$ ] (negative area) 2.**

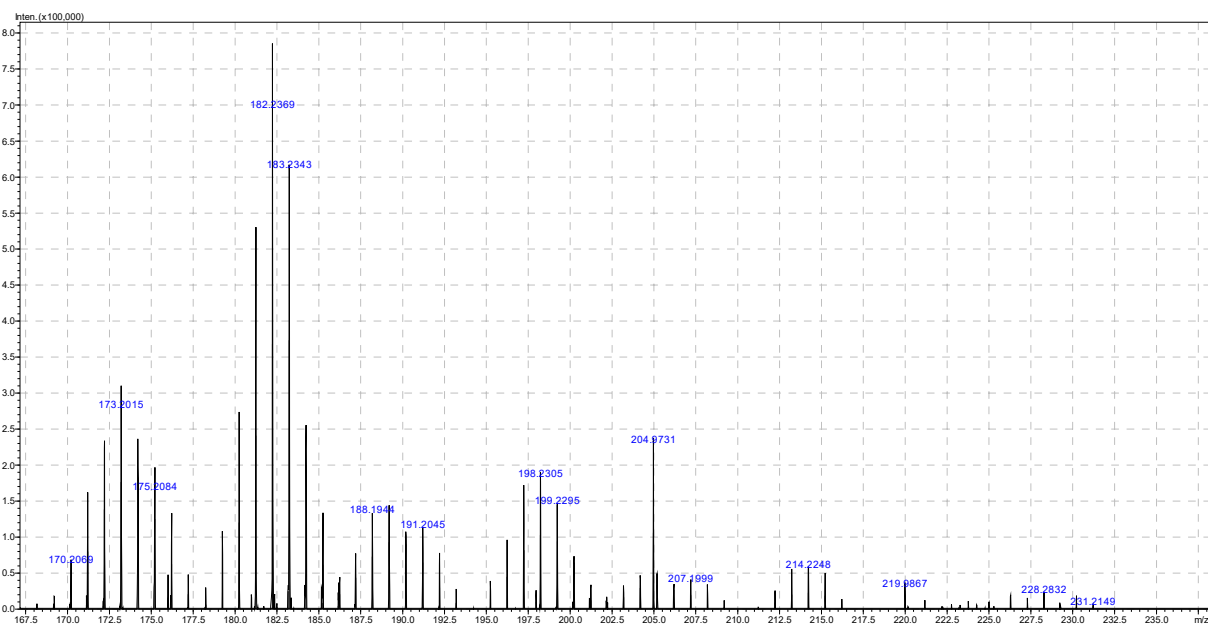

$^{11}\text{B}\{^1\text{H}\}$  NMR spectrum  $(\text{NBu}_4)[\text{B}_{12}\text{H}_{11}(\text{NHC}(\text{NH}_2)\text{CH}_3)]$  3a.

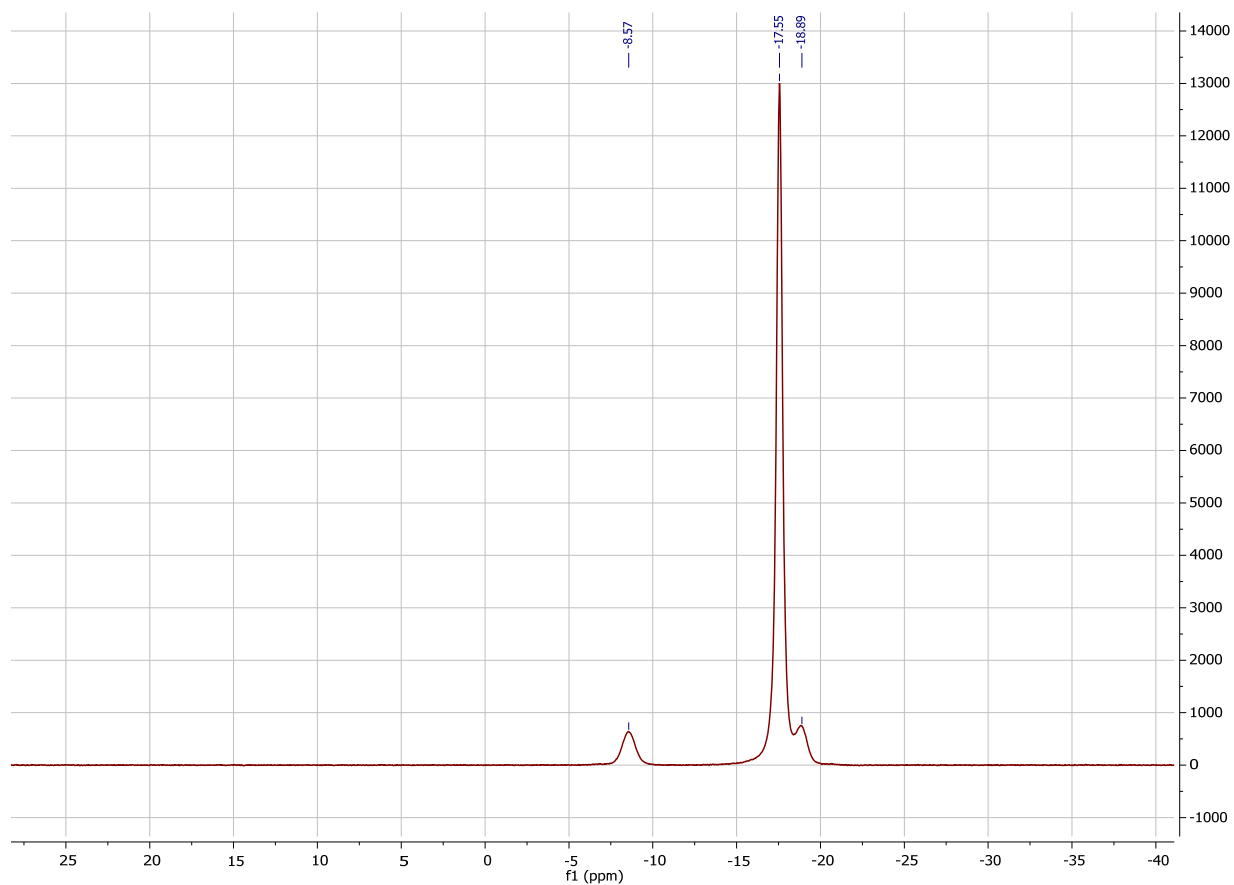

$^1\text{H}$  NMR spectrum  $(\text{NBu}_4)[\text{B}_{12}\text{H}_{11}(\text{NHC}(\text{NH}_2)\text{CH}_3)]$  3a.

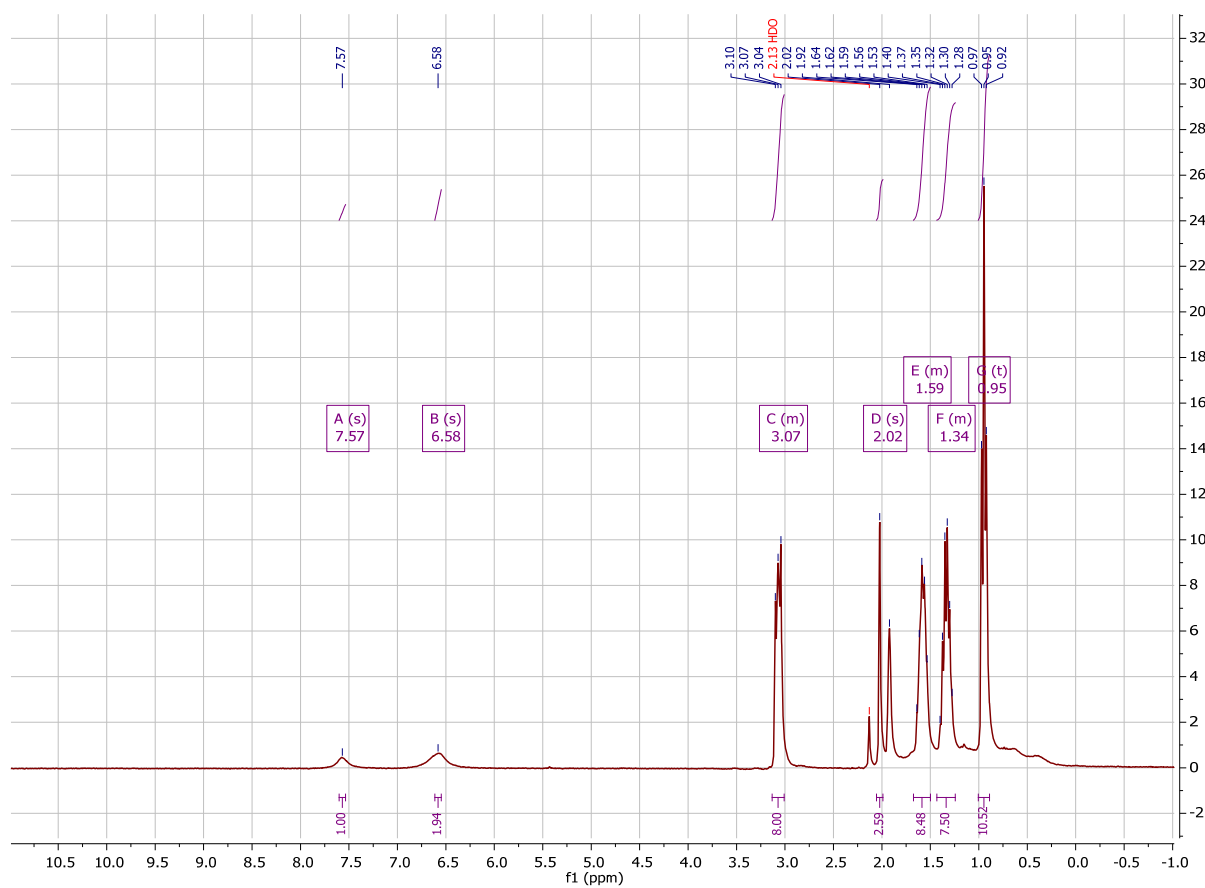

**$^{13}\text{C}$  NMR spectrum  $(\text{NBu}_4)[\text{B}_{12}\text{H}_{11}(\text{NHC}(\text{NH}_2)\text{CH}_3)]$  3a.**

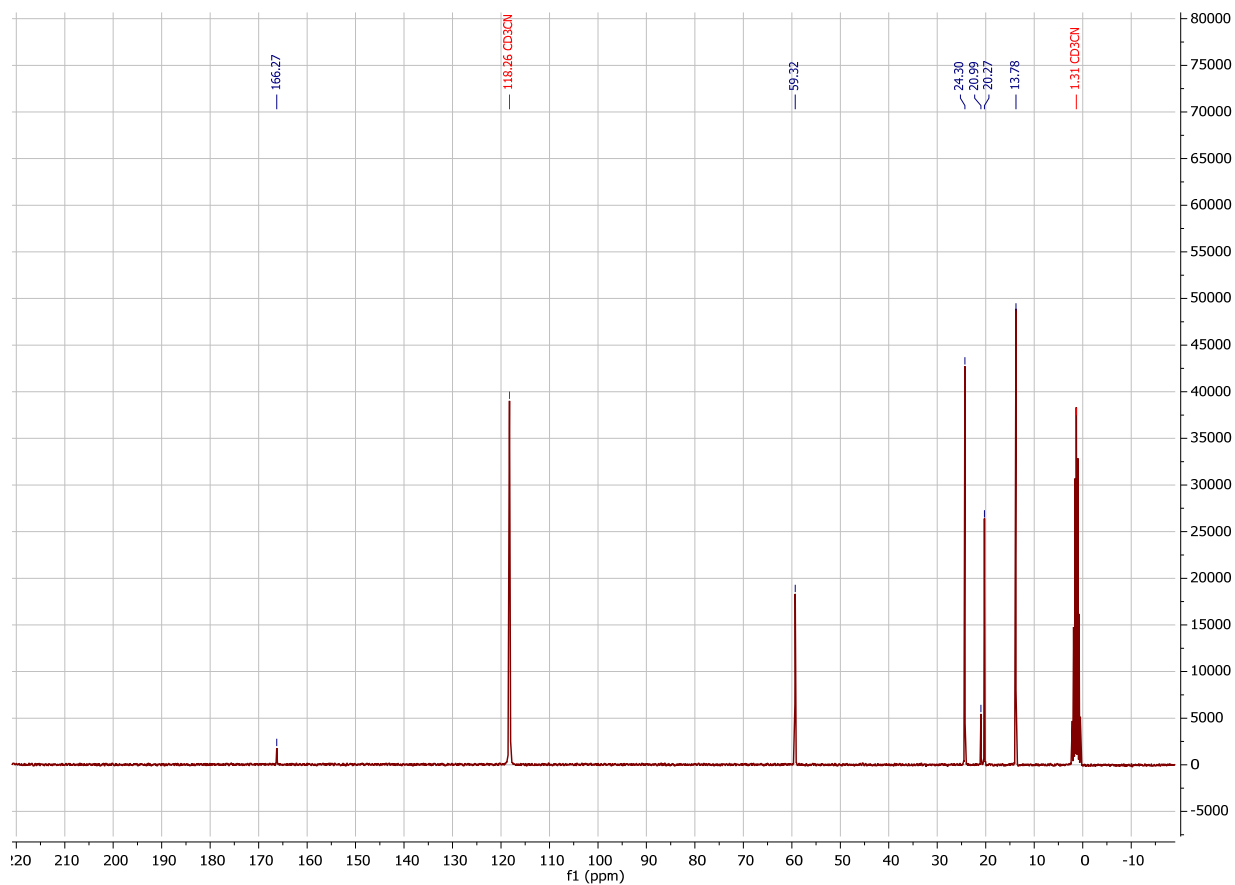

**ESI-MS spectrum  $(\text{NBu}_4)[\text{B}_{12}\text{H}_{11}(\text{NHC}(\text{NH}_2)\text{CH}_3)]$  (negative area) 3a.**

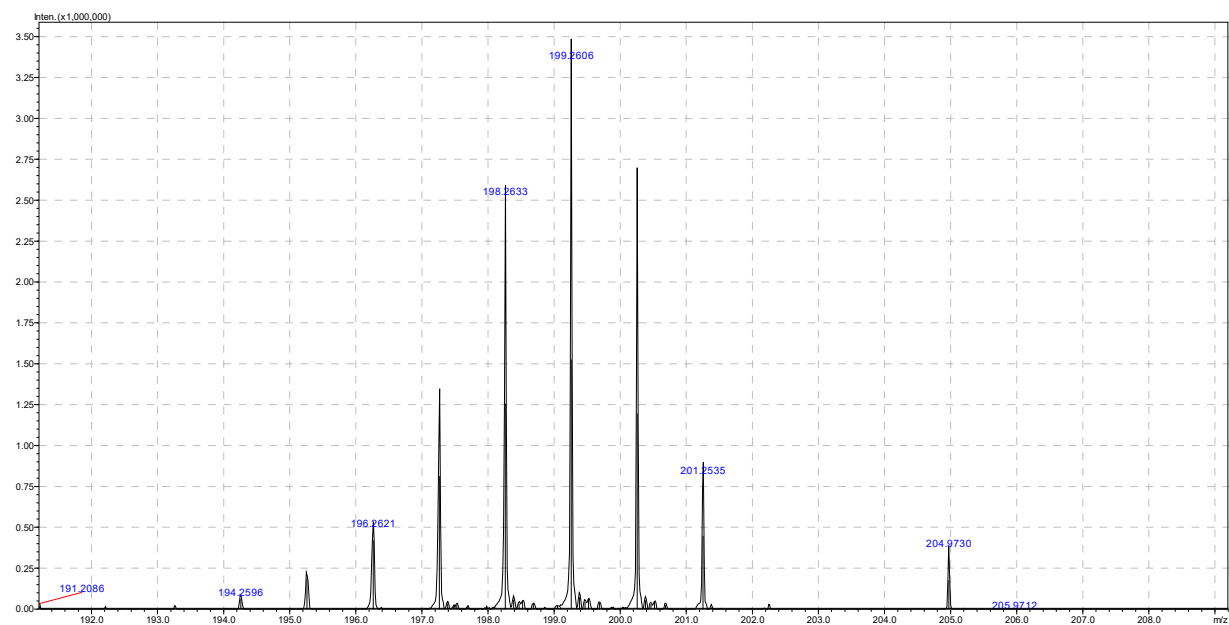

$^{11}\text{B}\{^1\text{H}\}$  NMR spectrum  $(\text{NBu}_4)[\text{B}_{12}\text{H}_{11}(\text{NHC}(\text{NHCH}_3)\text{CH}_3)]$  **3b**.

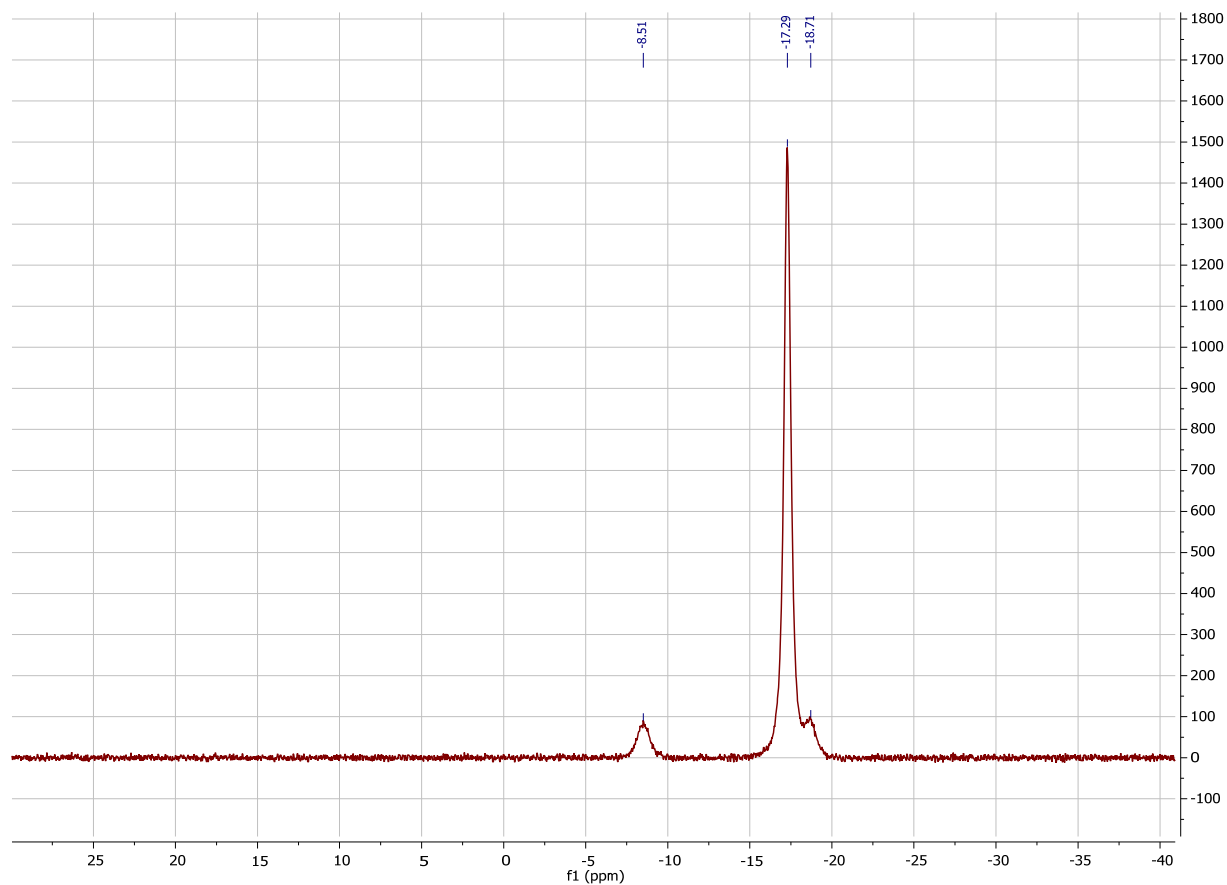

$^1\text{H}$  NMR spectrum  $(\text{NBu}_4)[\text{B}_{12}\text{H}_{11}(\text{NHC}(\text{NHCH}_3)\text{CH}_3)]$  **3b**.

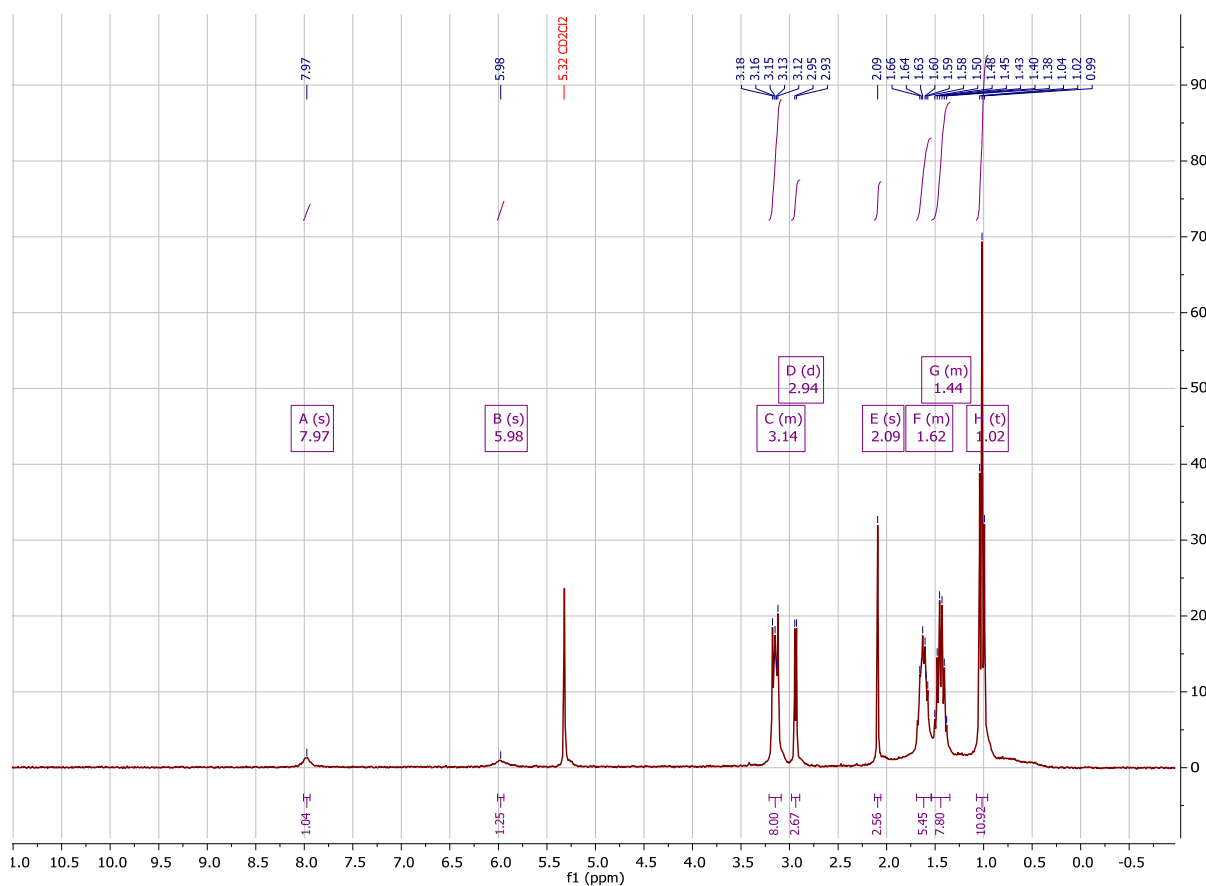

**$^{13}\text{C}$  NMR spectrum ( $\text{NBu}_4$ )[ $\text{B}_{12}\text{H}_{11}(\text{NHC}(\text{NHCH}_3)\text{CH}_3)$ ] 3b.**

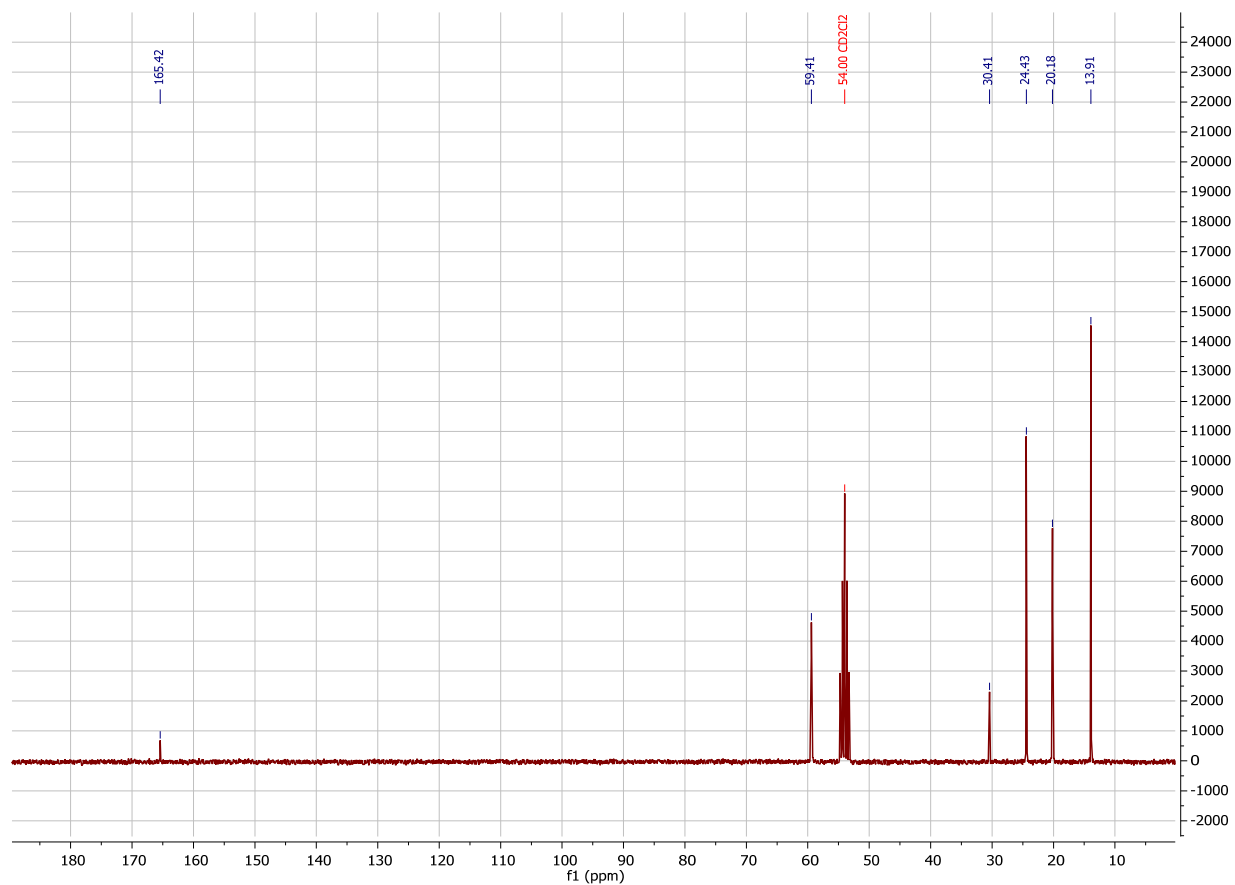

**ESI-MS spectrum ( $\text{NBu}_4$ )[ $\text{B}_{12}\text{H}_{11}(\text{NHC}(\text{NHCH}_3)\text{CH}_3)$ ] (negative area) 3b.**

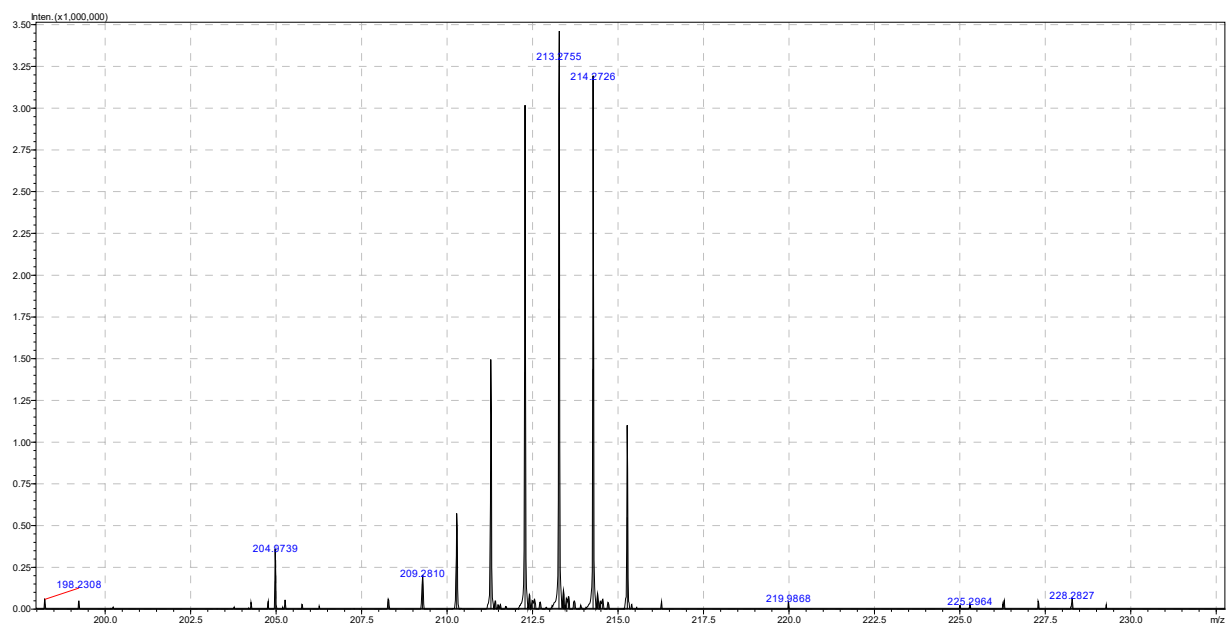

$^{11}\text{B}\{^1\text{H}\}$  NMR spectrum  $(\text{NBu}_4)[\text{B}_{12}\text{H}_{11}(\text{NHC}(\text{NHCH}_2\text{COOC}_2\text{H}_5)\text{CH}_3)]$  3c.

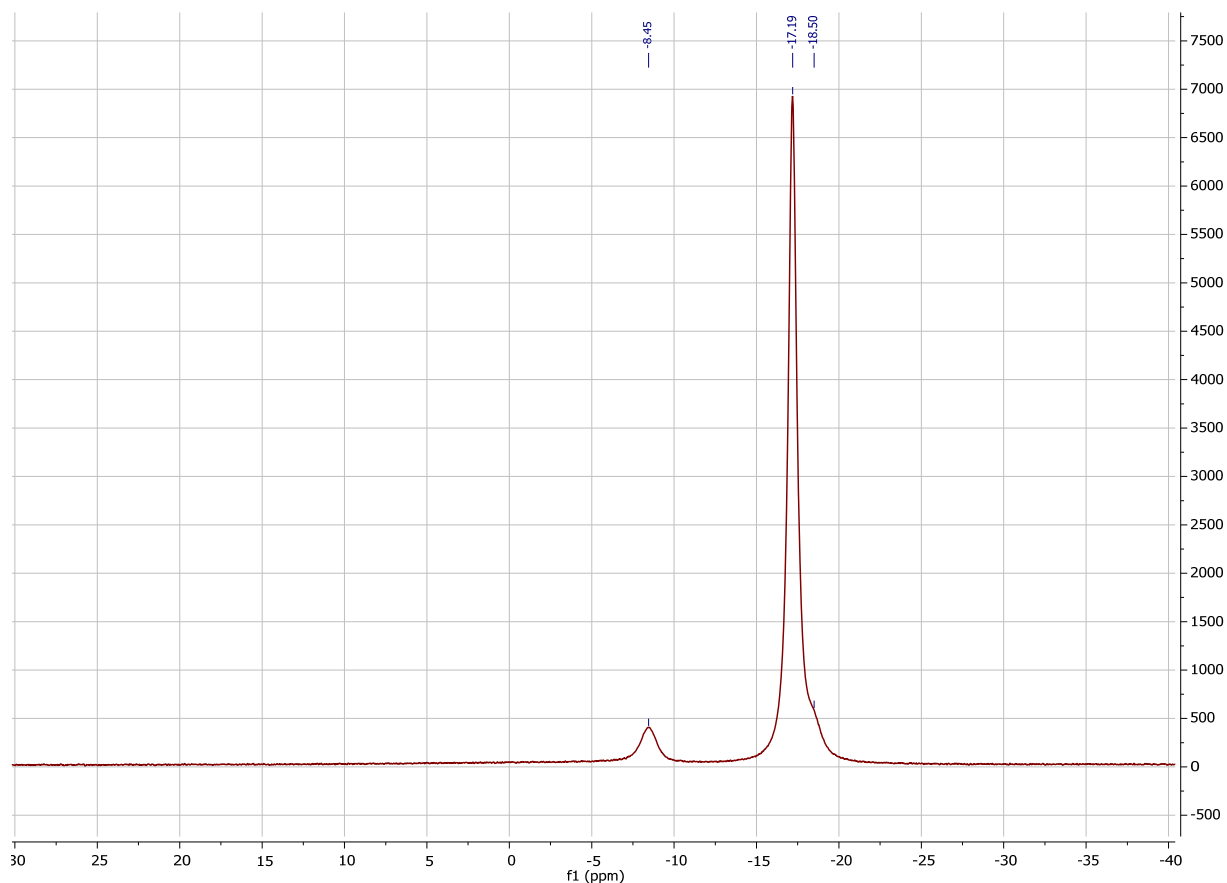

$^1\text{H}$  NMR spectrum  $(\text{NBu}_4)[\text{B}_{12}\text{H}_{11}(\text{NHC}(\text{NHCH}_2\text{COOC}_2\text{H}_5)\text{CH}_3)]$  3c.

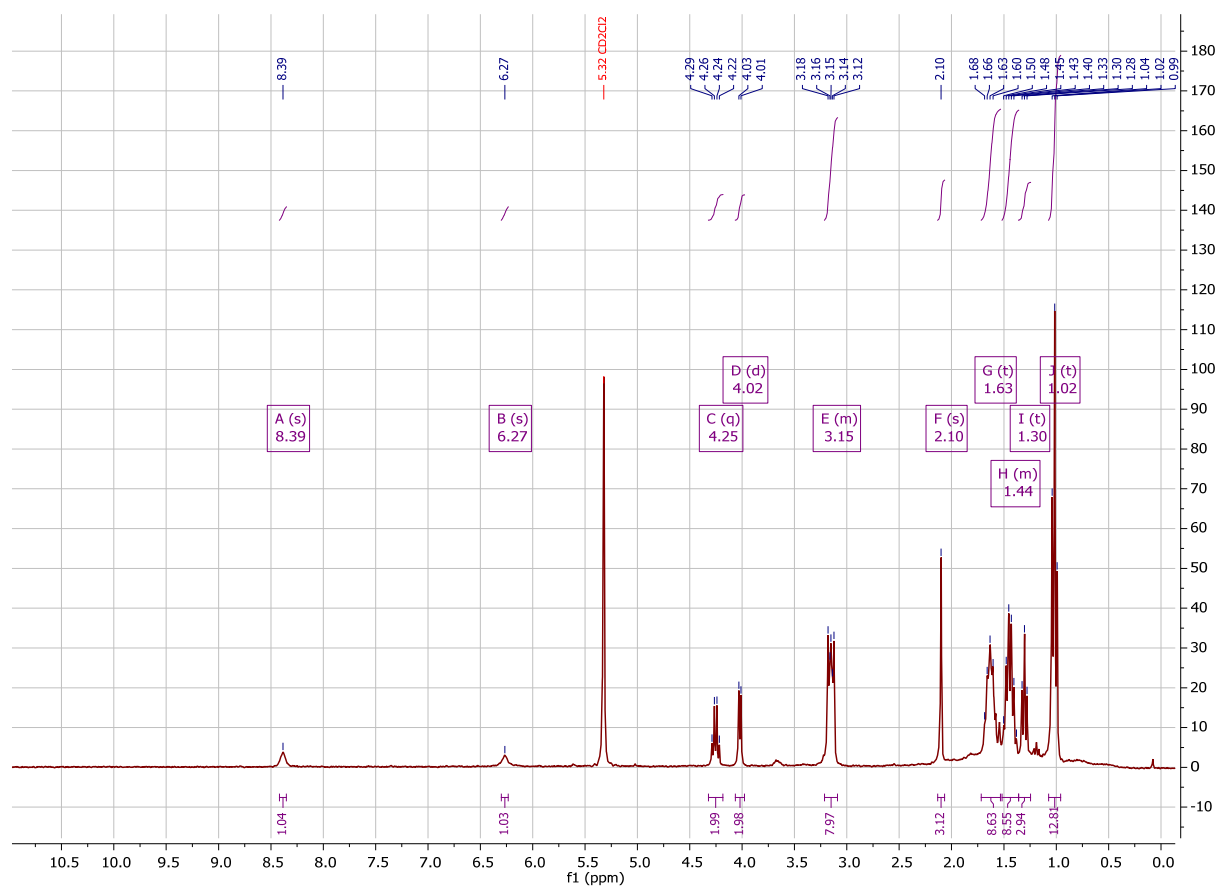



**$^{13}\text{C}$  NMR spectrum ( $\text{NBu}_4$ )[ $\text{B}_{12}\text{H}_{11}(\text{NHC}(\text{NHCH}_2\text{COOC}_2\text{H}_5)\text{CH}_3)$ ] 3c.**

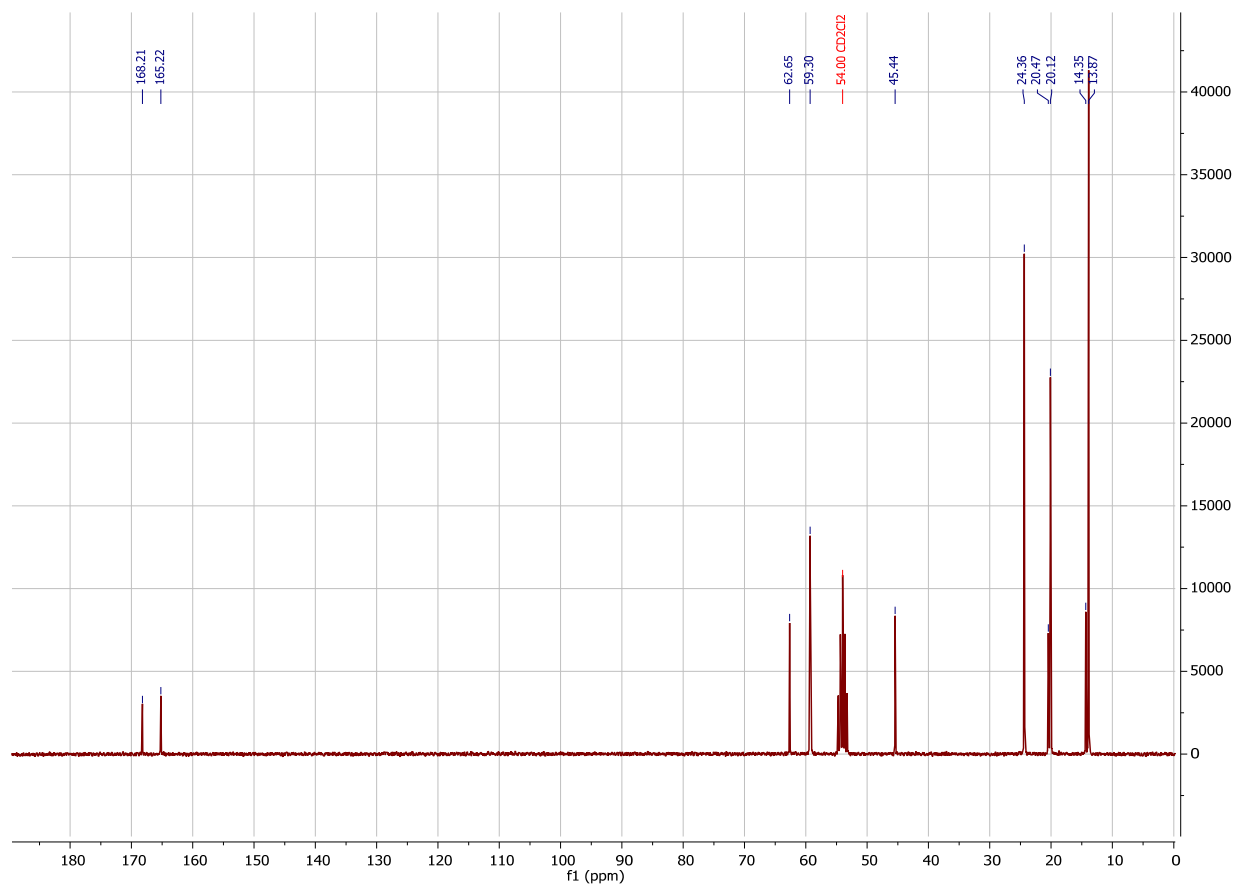

**ESI-MS spectrum ( $\text{NBu}_4$ )[ $\text{B}_{12}\text{H}_{11}(\text{NHC}(\text{NHCH}_2\text{COOC}_2\text{H}_5)\text{CH}_3)$ ] (negative area) 3c.**

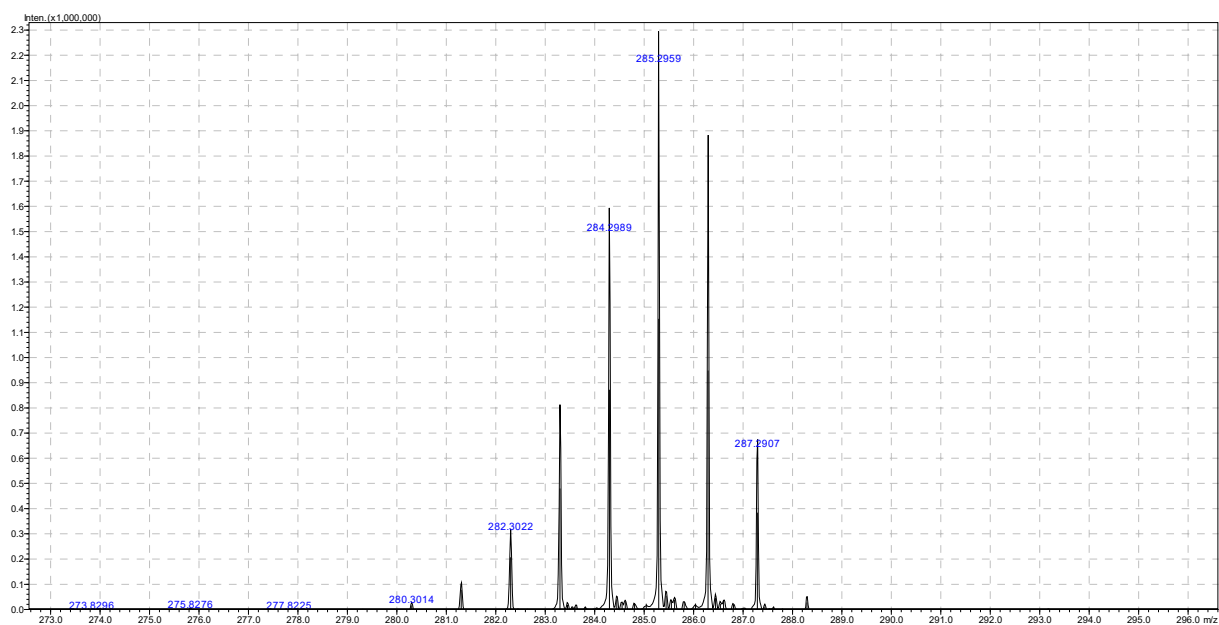

$^{11}\text{B}\{^1\text{H}\}$  NMR spectrum  $(\text{NBu}_4)[\text{B}_{12}\text{H}_{11}(\text{NHC}(\text{NHC}_3\text{H}_7)\text{CH}_3)]$  3d.

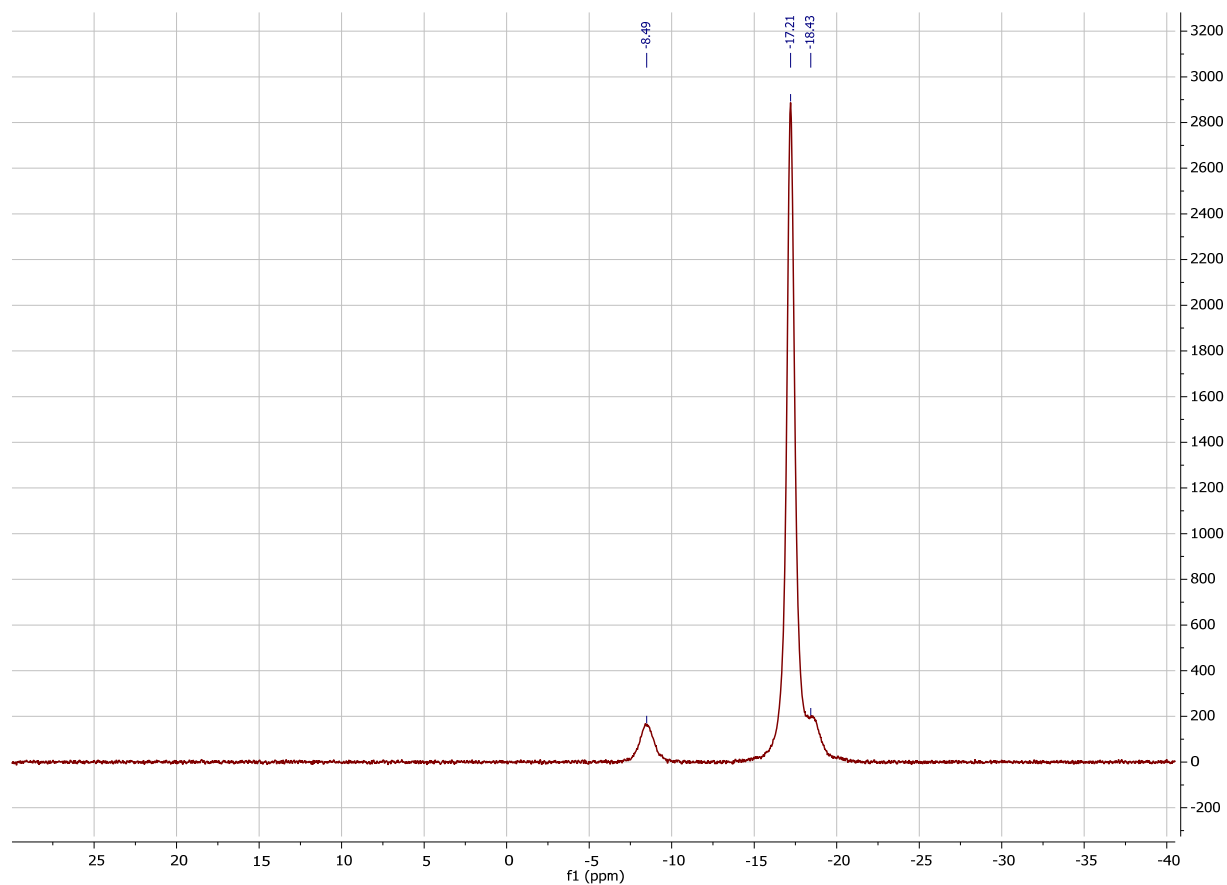

$^1\text{H}$  NMR spectrum  $(\text{NBu}_4)[\text{B}_{12}\text{H}_{11}(\text{NHC}(\text{NHC}_3\text{H}_7)\text{CH}_3)]$  3d.

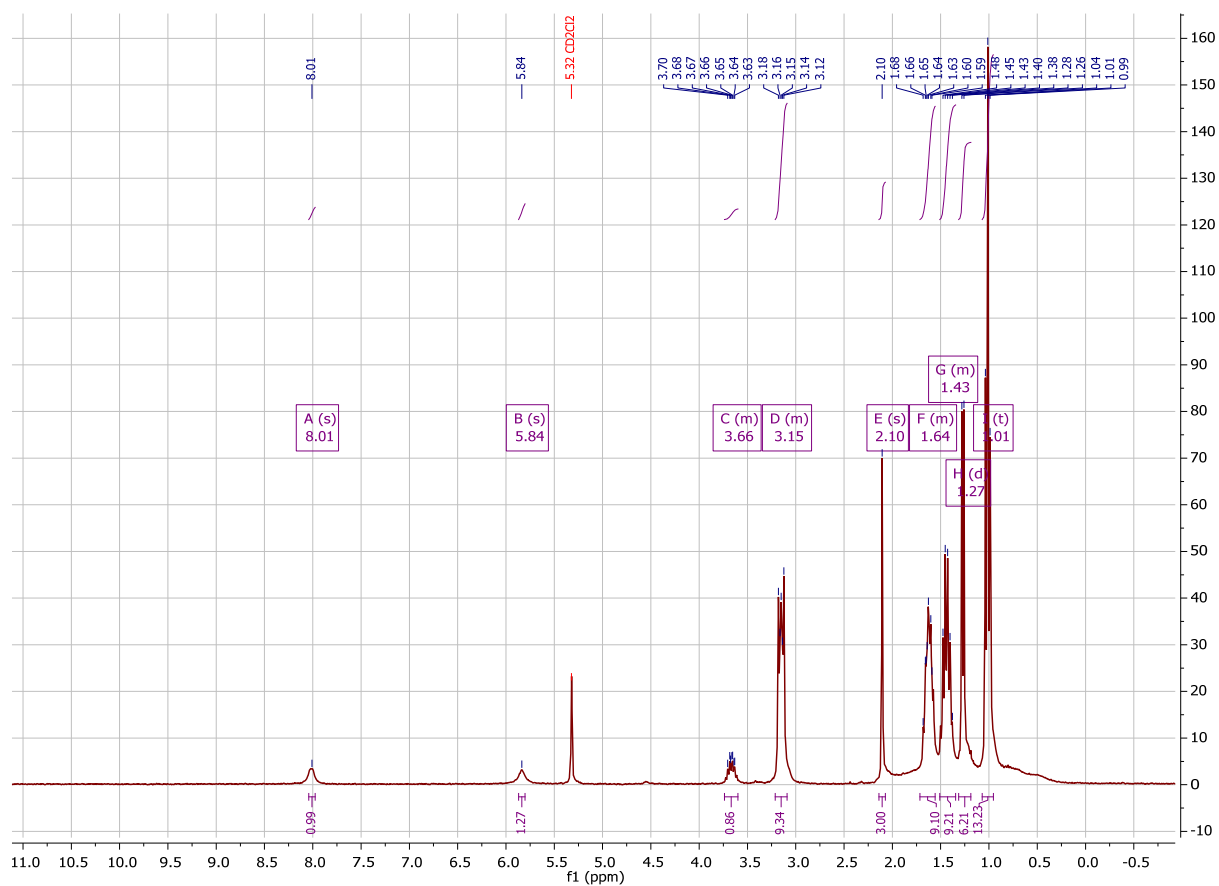

**$^{13}\text{C}$  NMR spectrum ( $\text{NBu}_4$ )[ $\text{B}_{12}\text{H}_{11}(\text{NHC}(\text{NHC}_3\text{H}_7)\text{CH}_3)$ ] 3d.**

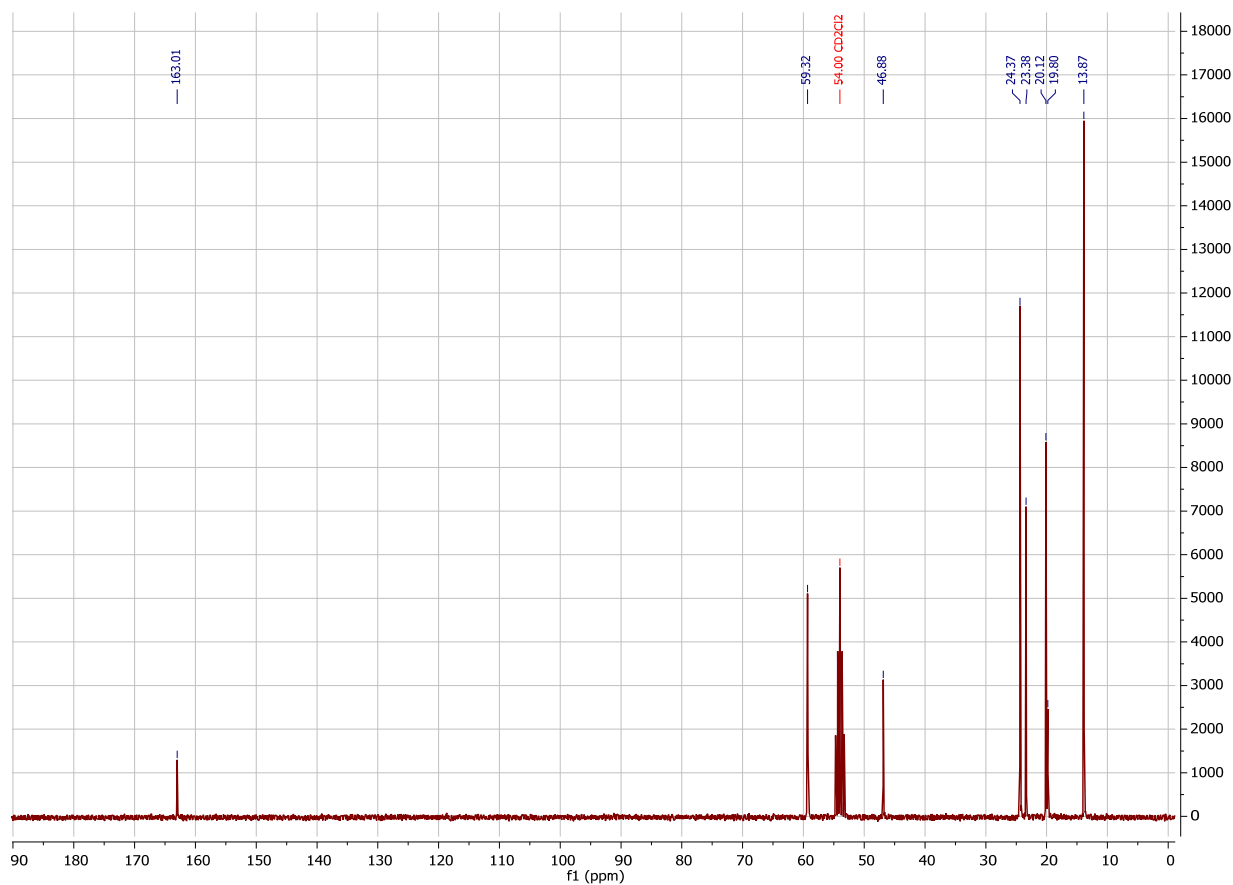

**ESI-MS spectrum ( $\text{NBu}_4$ )[ $\text{B}_{12}\text{H}_{11}(\text{NHC}(\text{NHC}_3\text{H}_7)\text{CH}_3)$ ] (negative area) 3d.**

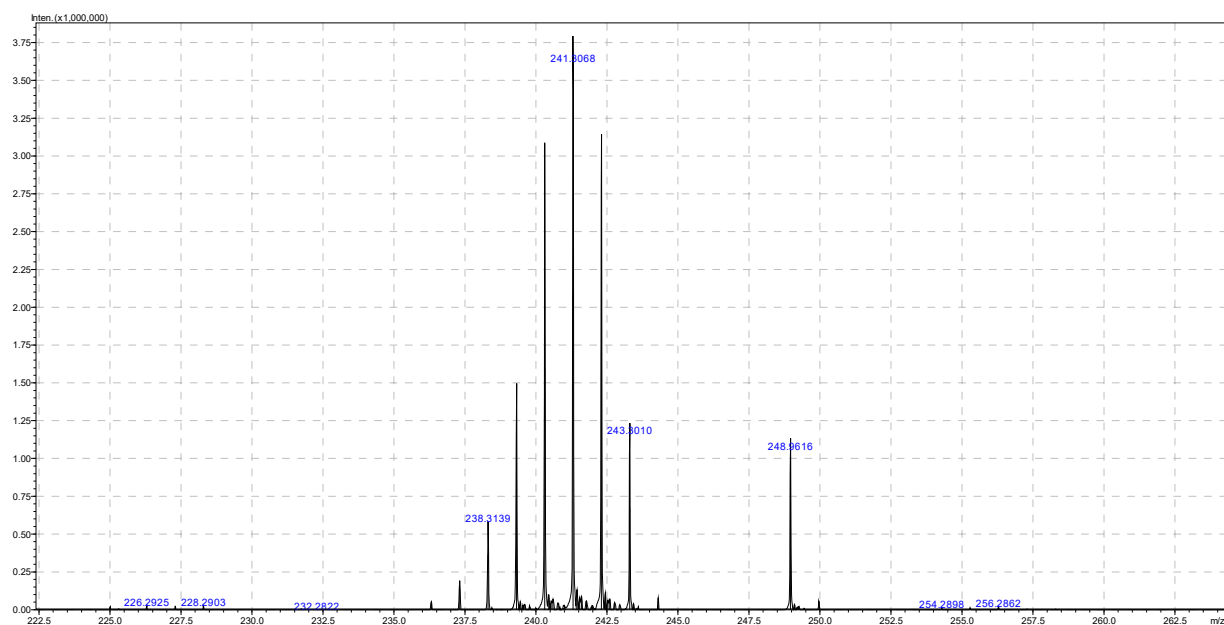

$^{11}\text{B}\{^1\text{H}\}$  NMR spectrum  $(\text{NBu}_4)[\text{B}_{12}\text{H}_{11}(\text{NHC}(\text{NHC}_4\text{H}_9)\text{CH}_3)]$  **3e**.

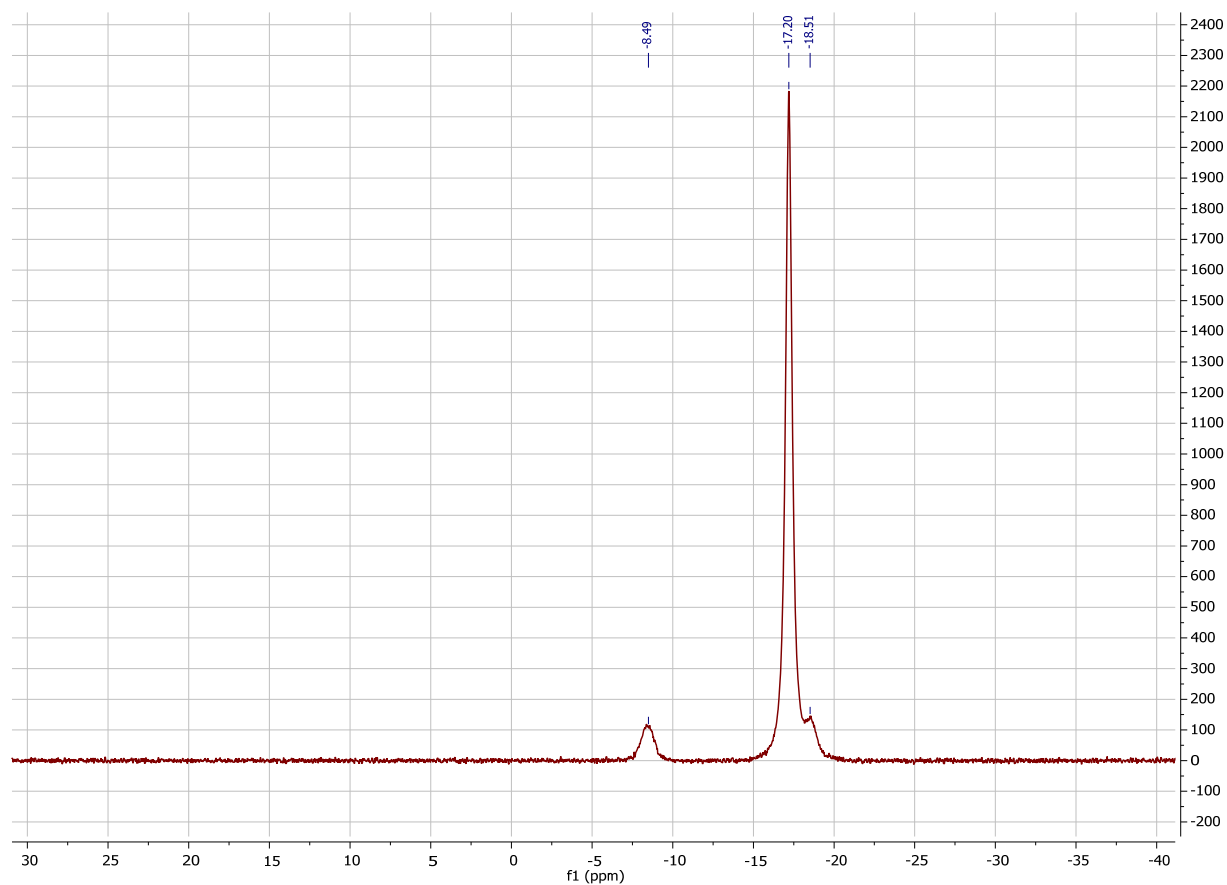

$^1\text{H}$  NMR spectrum  $(\text{NBu}_4)[\text{B}_{12}\text{H}_{11}(\text{NHC}(\text{NHC}_4\text{H}_9)\text{CH}_3)]$  **3e**.

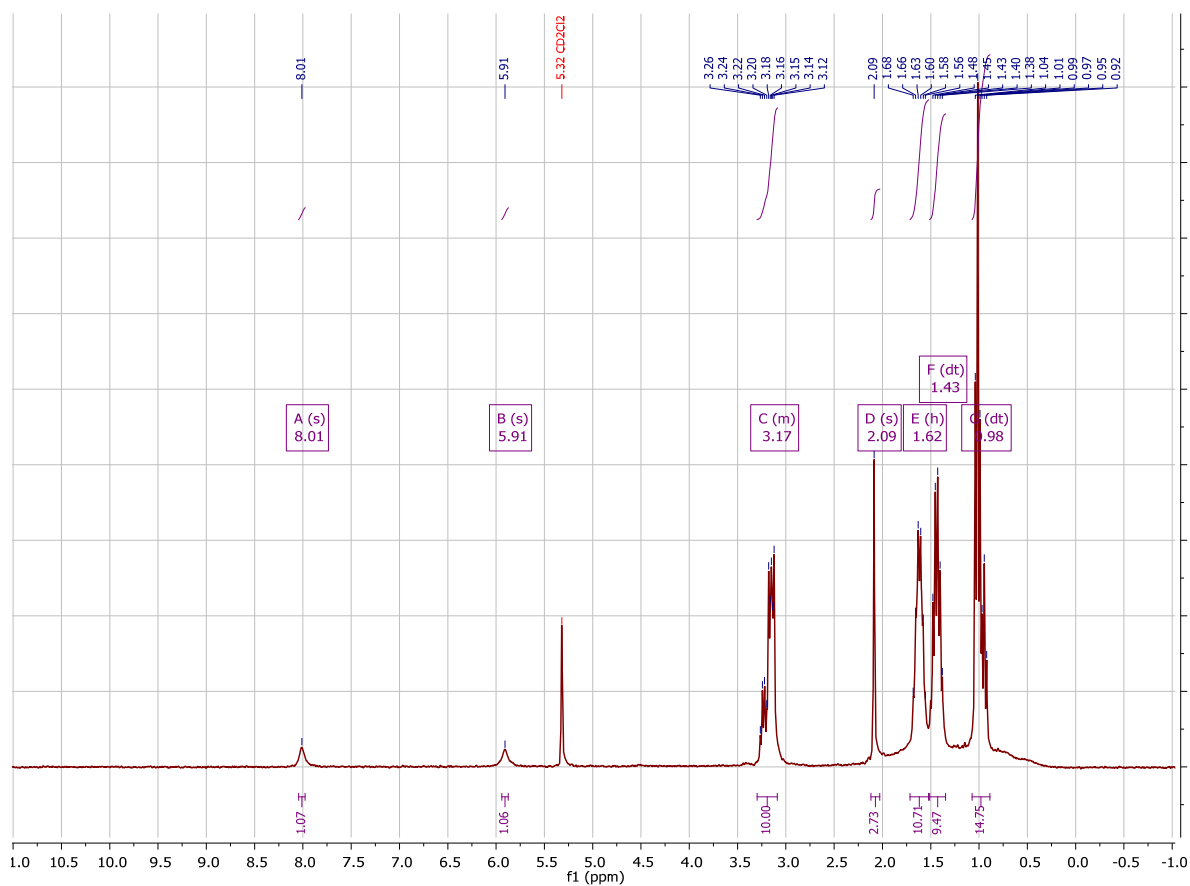

**$^{13}\text{C}$  NMR spectrum  $(\text{NBu}_4)[\text{B}_{12}\text{H}_{11}(\text{NHC}(\text{NHC}_4\text{H}_9)\text{CH}_3)]$  3e.**

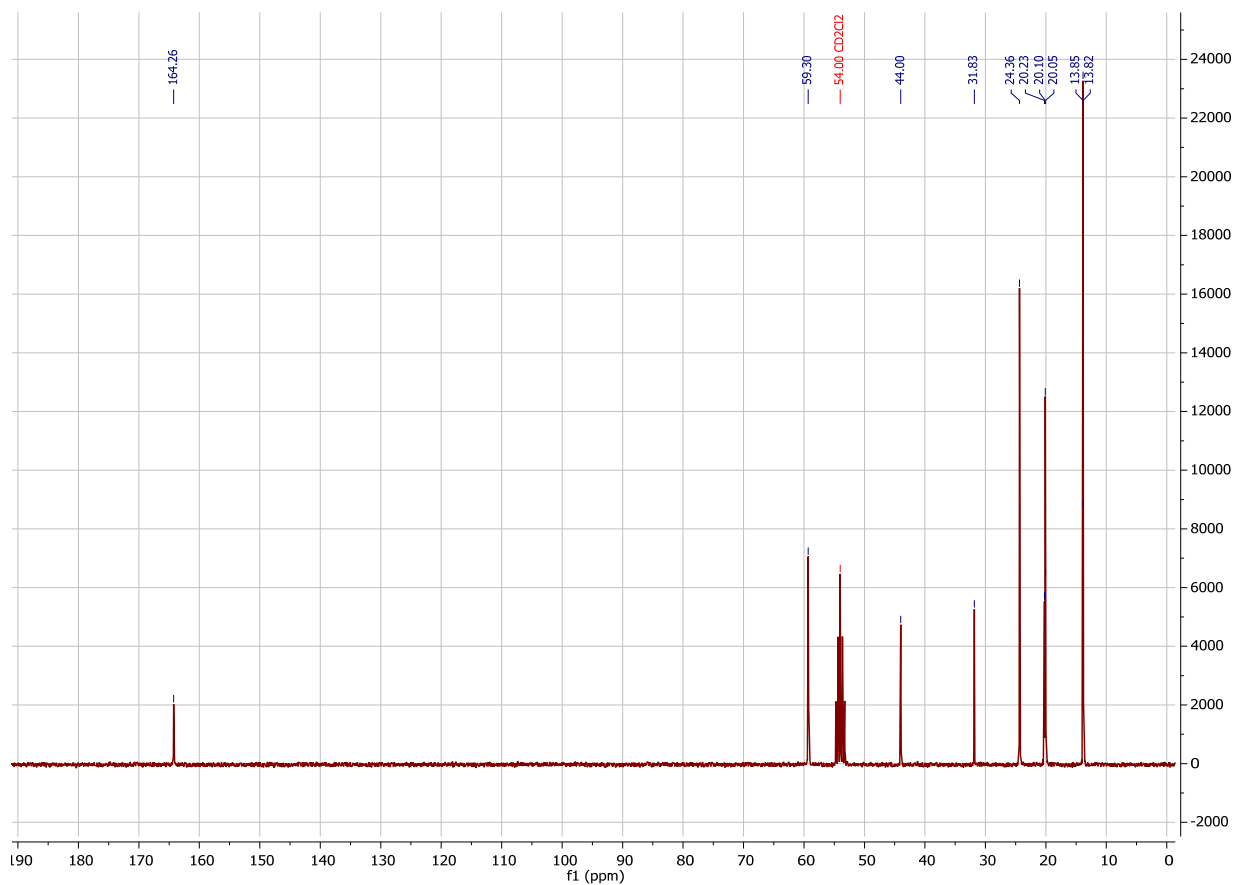

**ESI-MS spectrum  $(\text{NBu}_4)[\text{B}_{12}\text{H}_{11}(\text{NHC}(\text{NHC}_4\text{H}_9)\text{CH}_3)]$  (negative area) 3e.**

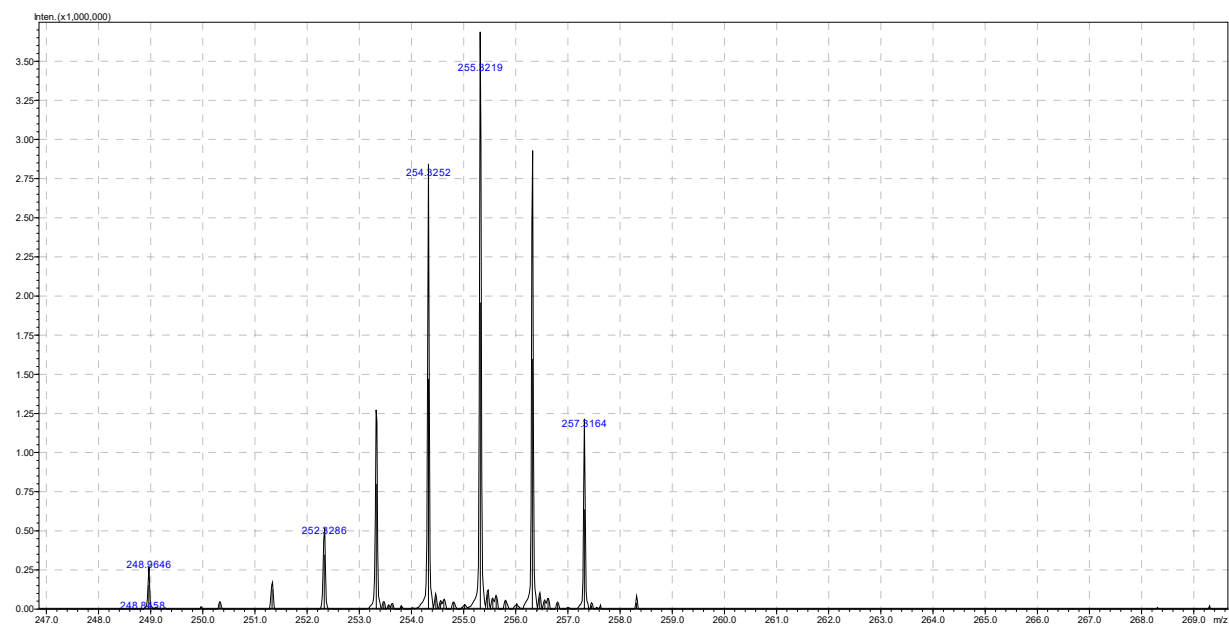

$^{11}\text{B}\{^1\text{H}\}$  NMR spectrum  $(\text{NBu}_4)[\text{B}_{12}\text{H}_{11}(\text{NHC}(\text{NH}(\text{CH}_2)_2\text{OH})\text{CH}_3)]$  3f.

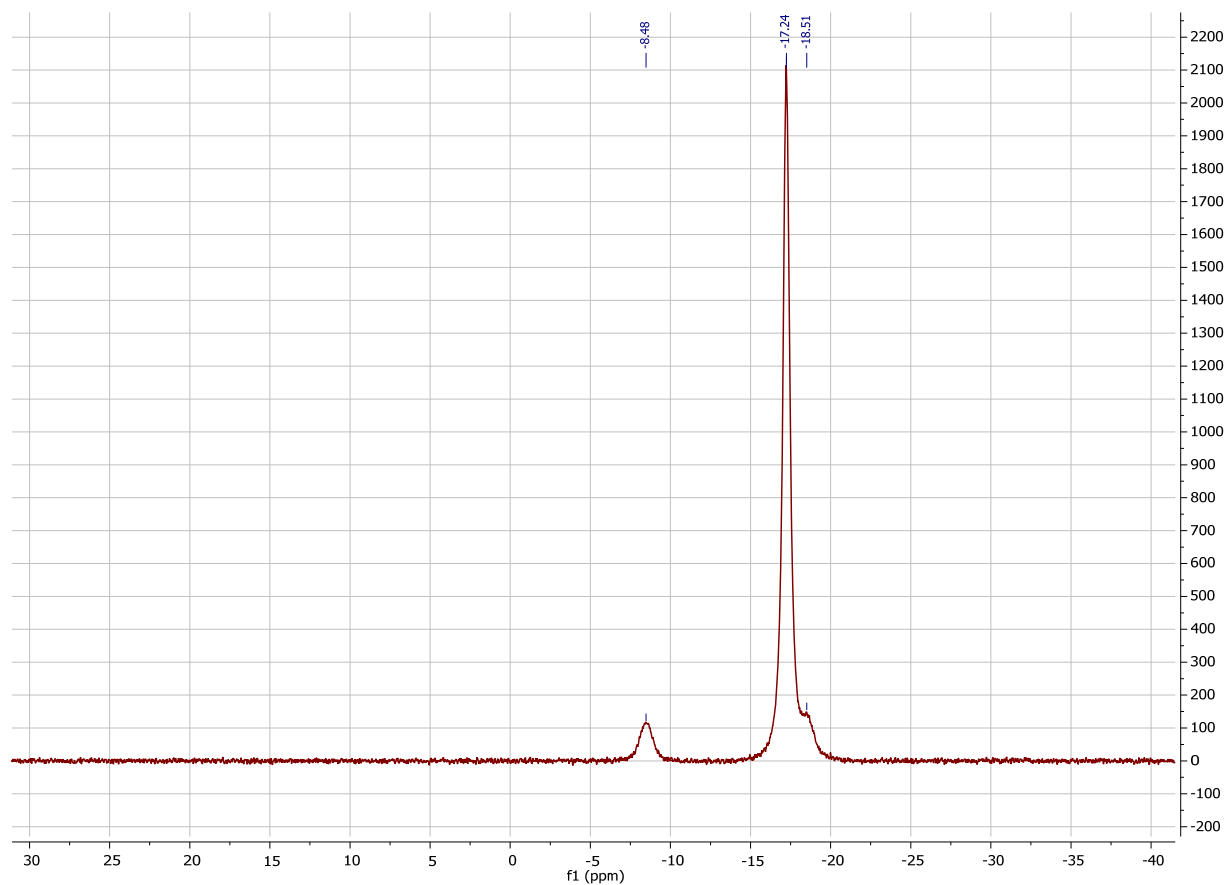

$^1\text{H}$  NMR spectrum  $(\text{NBu}_4)[\text{B}_{12}\text{H}_{11}(\text{NHC}(\text{NH}(\text{CH}_2)_2\text{OH})\text{CH}_3)]$  3f.

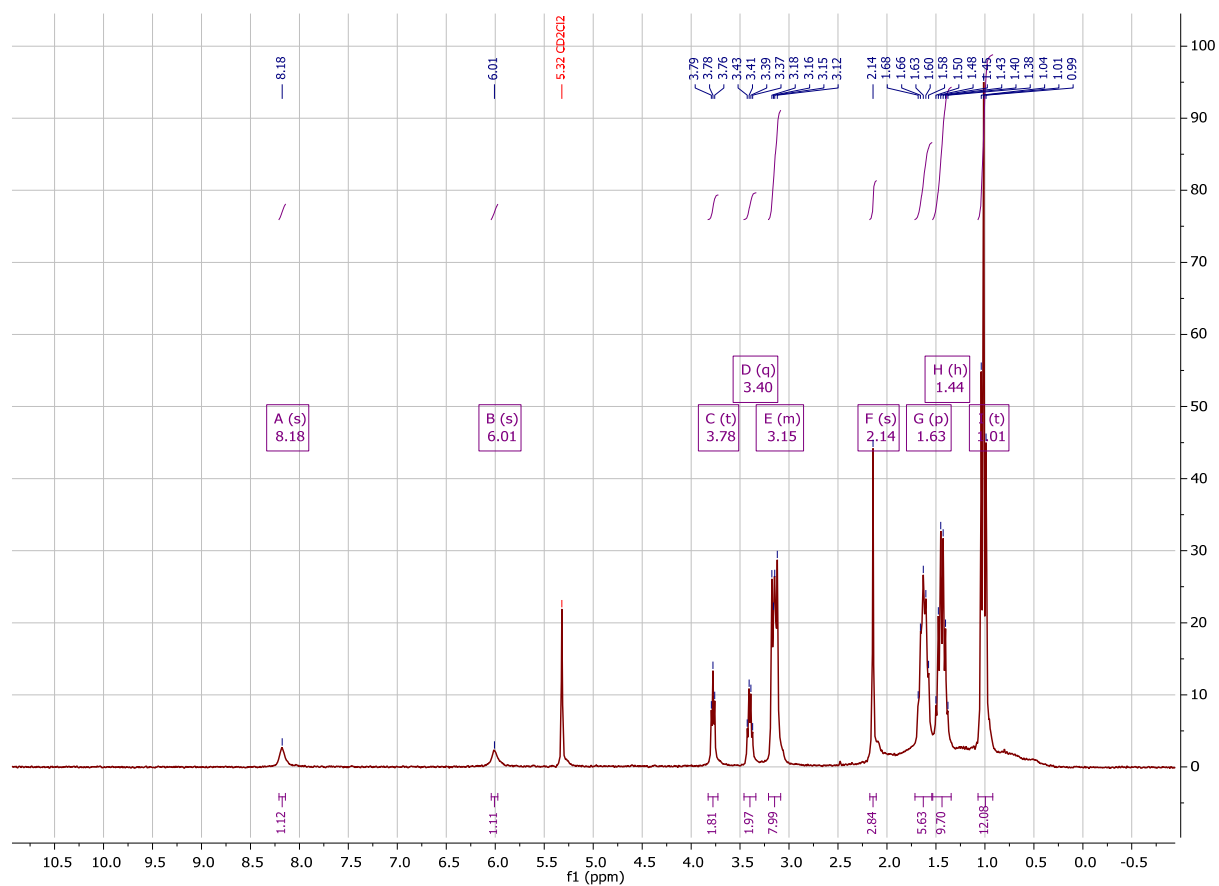

**$^{13}\text{C}$  NMR spectrum  $(\text{NBu}_4)[\text{B}_{12}\text{H}_{11}(\text{NHC}(\text{NH}(\text{CH}_2)_2\text{OH})\text{CH}_3)]$  3f.**

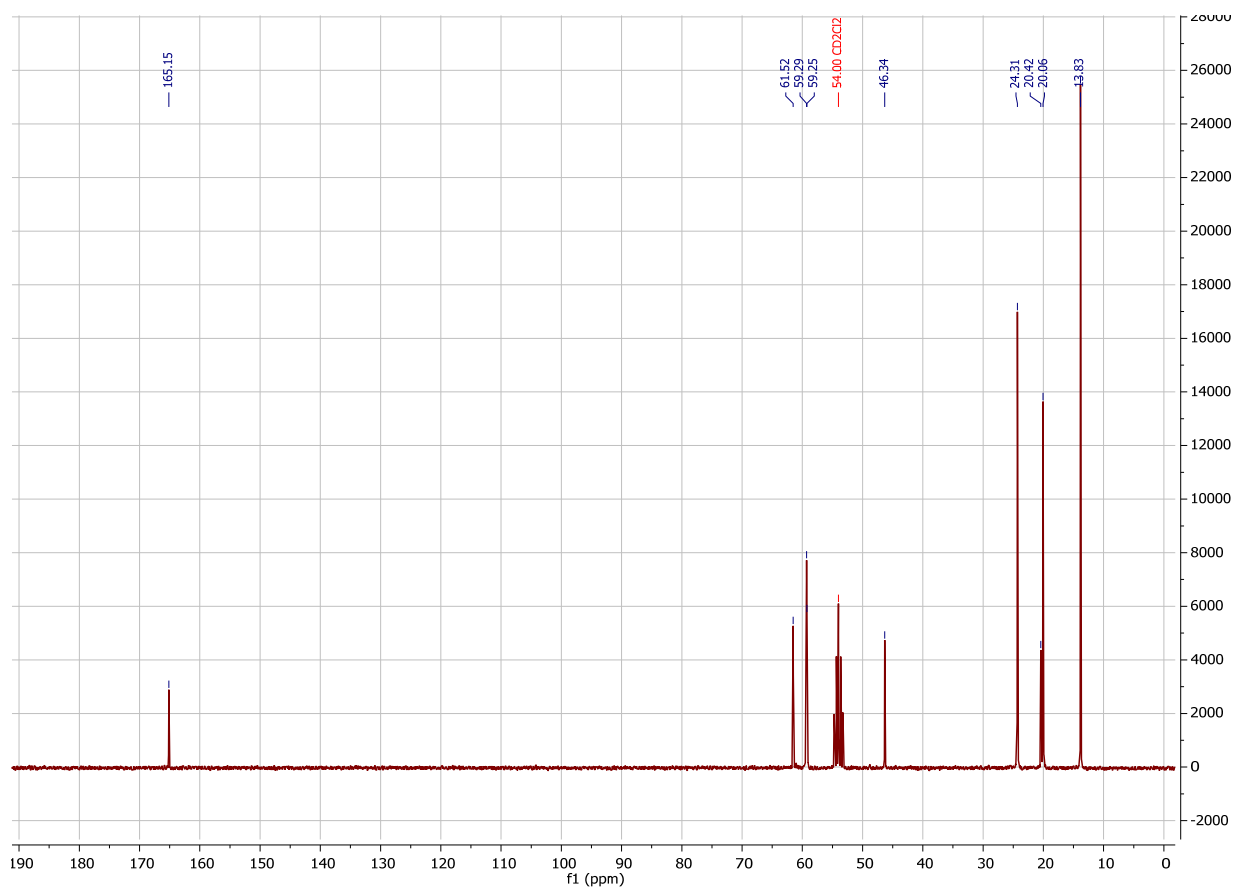

**ESI-MS spectrum  $(\text{NBu}_4)[\text{B}_{12}\text{H}_{11}(\text{NHC}(\text{NH}(\text{CH}_2)_2\text{OH})\text{CH}_3)]$  (negative area) 3f.**

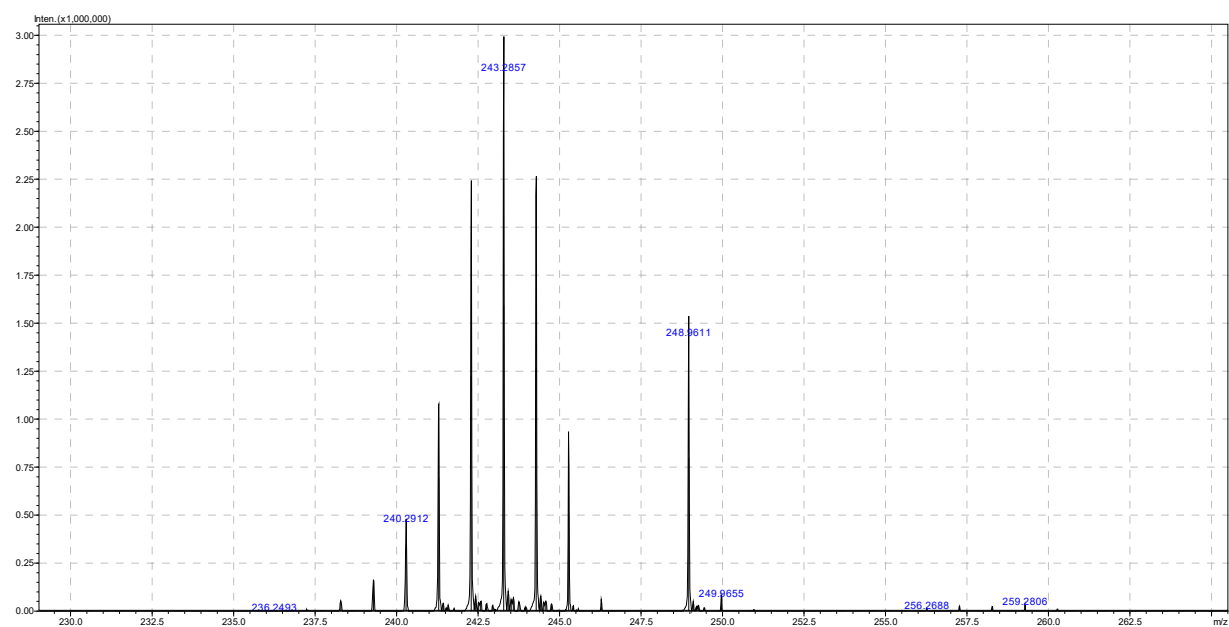

$^{11}\text{B}\{^1\text{H}\}$  NMR spectrum  $(\text{NBu}_4)[\text{B}_{12}\text{H}_{11}(\text{NHC}(\text{NHC}_6\text{H}_5)\text{CH}_3)]$  3g.

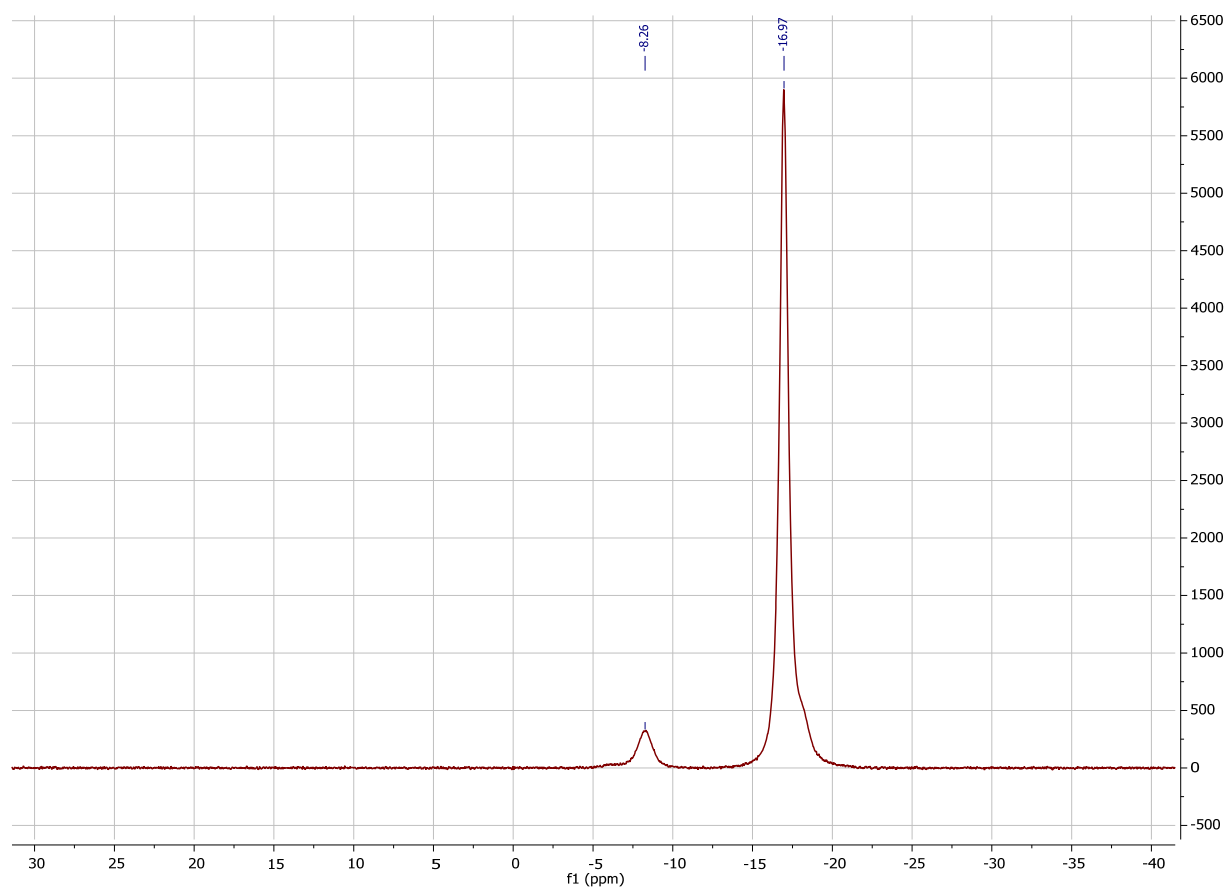

$^1\text{H}$  NMR spectrum  $(\text{NBu}_4)[\text{B}_{12}\text{H}_{11}(\text{NHC}(\text{NHC}_6\text{H}_5)\text{CH}_3)]$  3g.

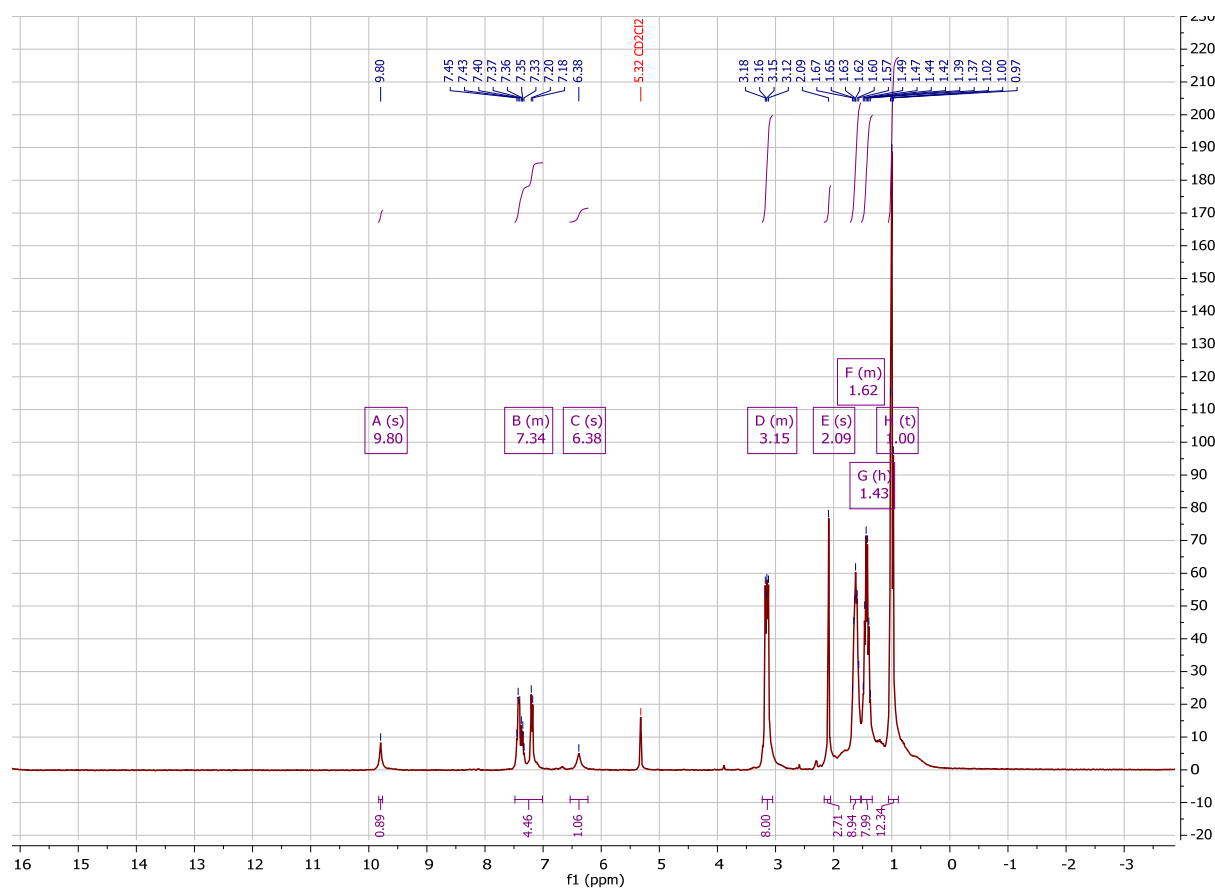



**$^{13}\text{C}$  NMR spectrum  $(\text{NBu}_4)[\text{B}_{12}\text{H}_{11}(\text{NHC}(\text{NHC}_6\text{H}_5)\text{CH}_3)]$  3g.**

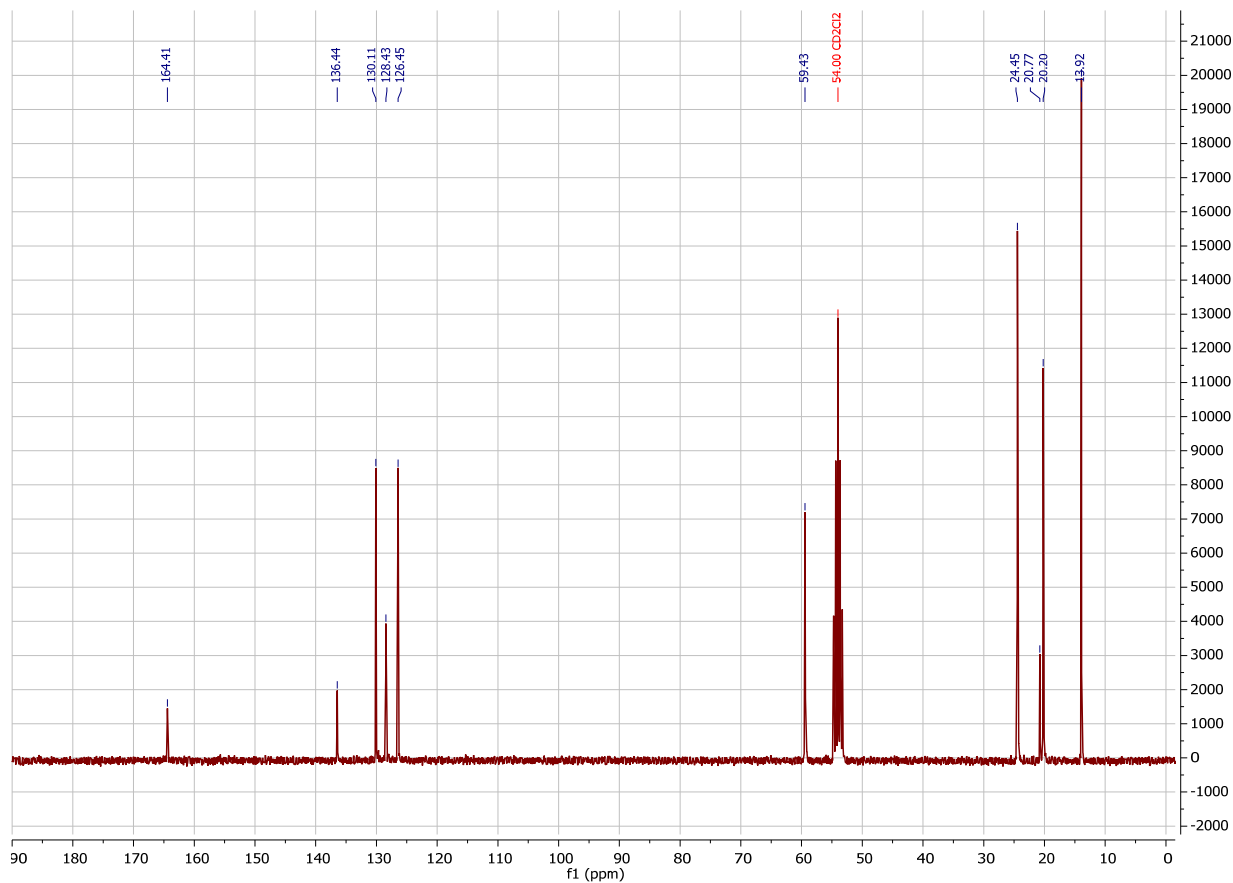

**ESI-MS spectrum  $(\text{NBu}_4)[\text{B}_{12}\text{H}_{11}(\text{NHC}(\text{NHC}_6\text{H}_5)\text{CH}_3)]$  (negative area) 3g.**

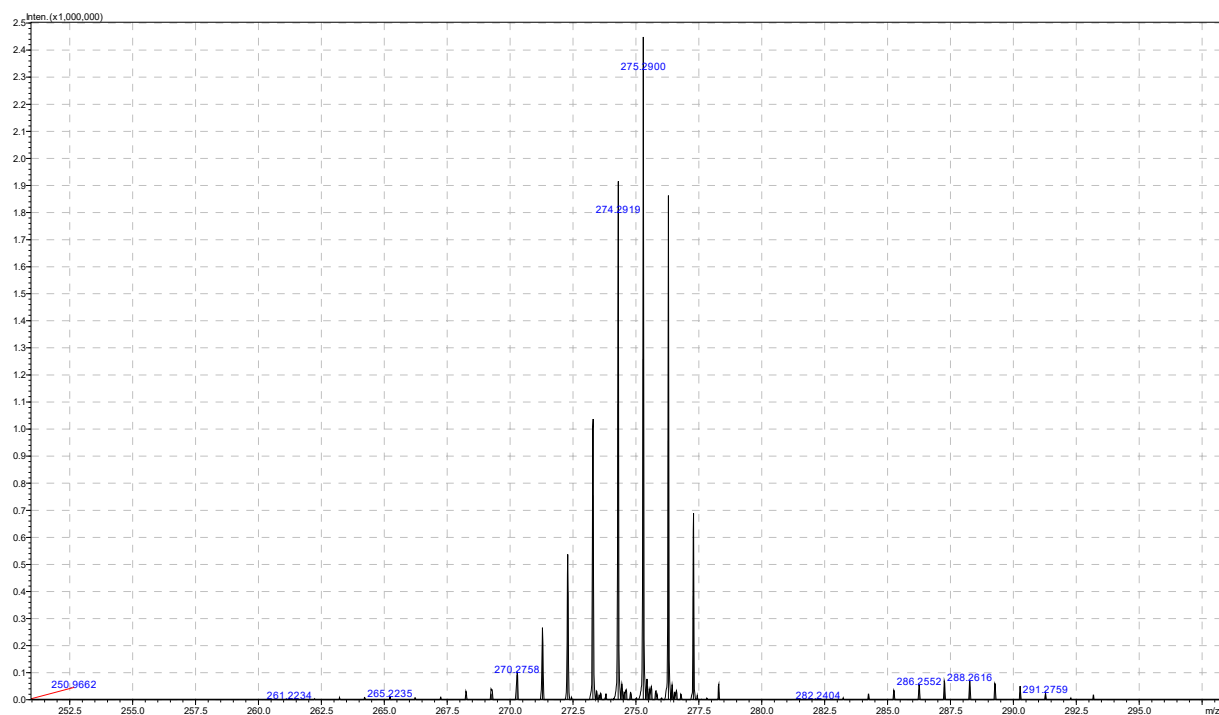

$^{11}\text{B}\{^1\text{H}\}$  NMR spectrum  $(\text{NBu}_4)[\text{B}_{12}\text{H}_{11}(\text{NHC}(\text{NHC}_6\text{H}_{12})\text{CH}_3)]$  3h.

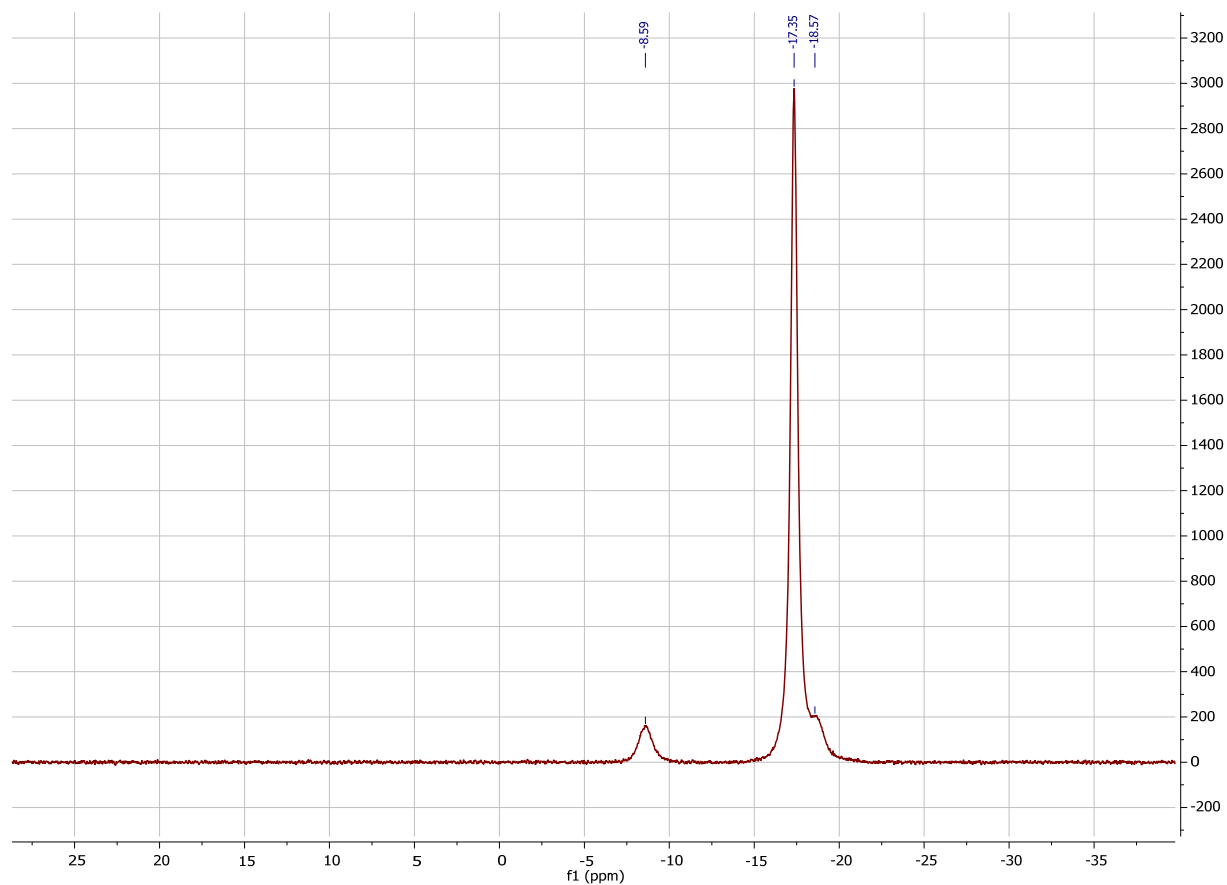

$^1\text{H}$  NMR spectrum  $(\text{NBu}_4)[\text{B}_{12}\text{H}_{11}(\text{NHC}(\text{NHC}_6\text{H}_{12})\text{CH}_3)]$  3h.

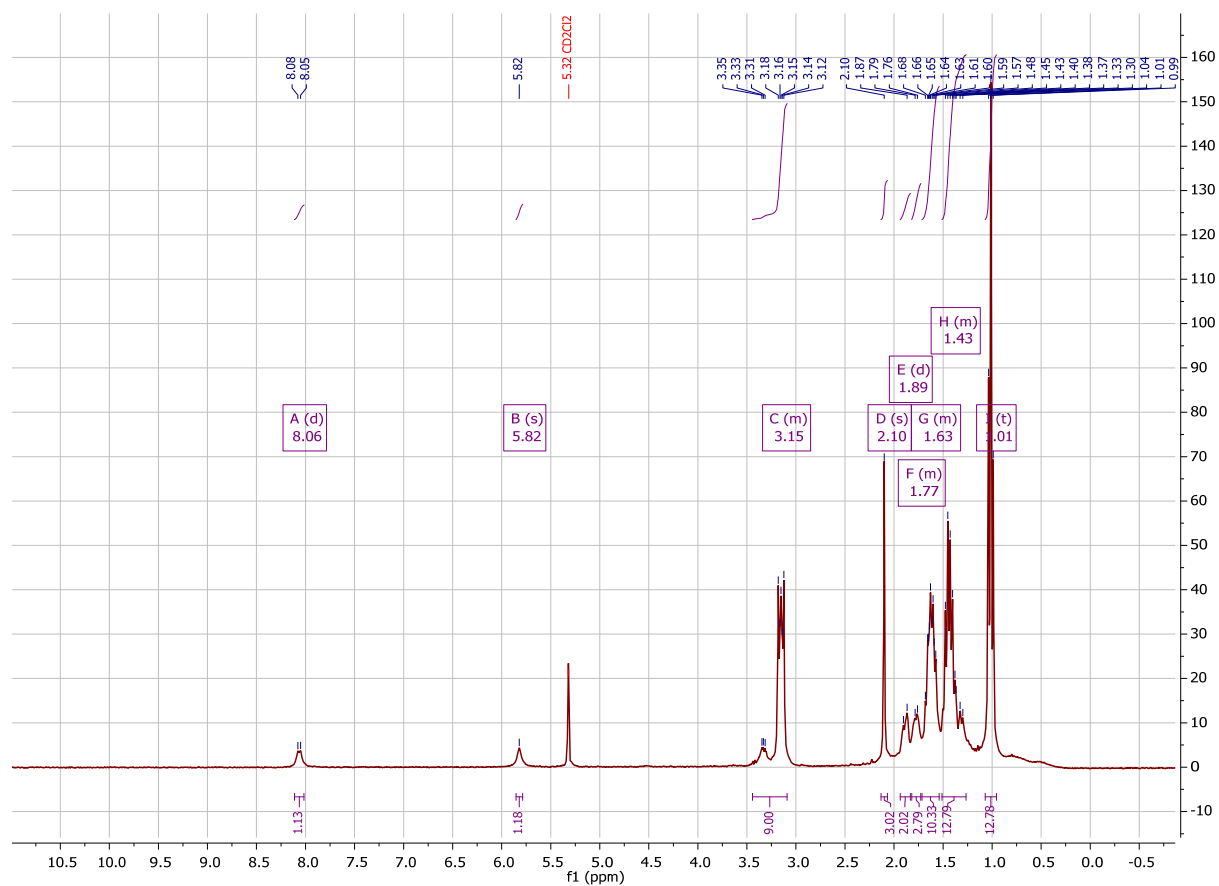

**$^{13}\text{C}$  NMR spectrum  $(\text{NBu}_4)[\text{B}_{12}\text{H}_{11}(\text{NHC}(\text{NHC}_6\text{H}_{12})\text{CH}_3)]$  3h.**

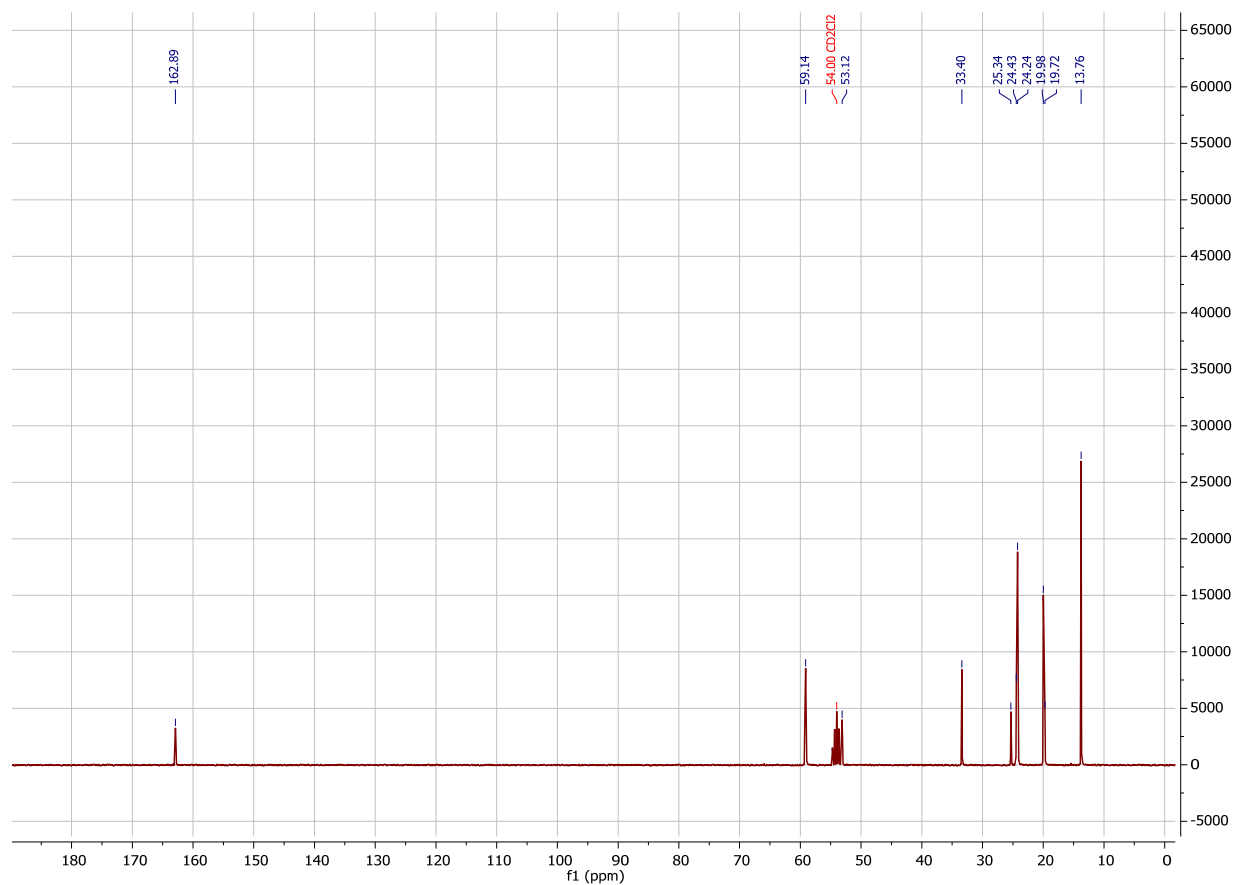

**ESI-MS spectrum  $(\text{NBu}_4)[\text{B}_{12}\text{H}_{11}(\text{NHC}(\text{NHC}_6\text{H}_{12})\text{CH}_3)]$  (negative area) 3h.**

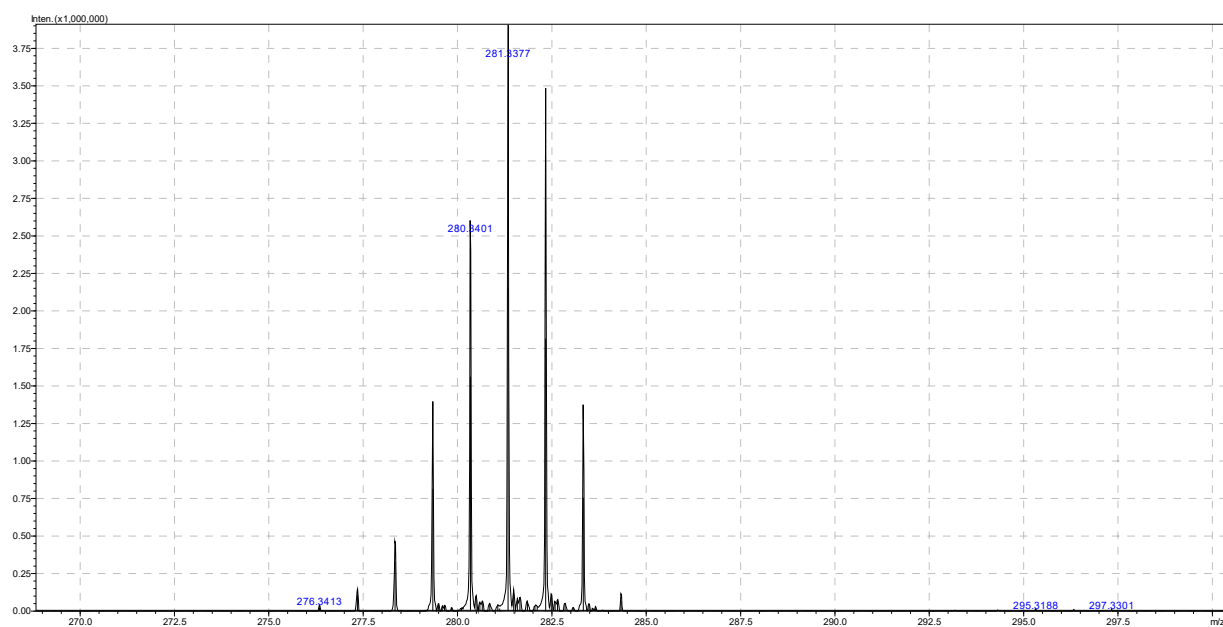

## 2. Computational details

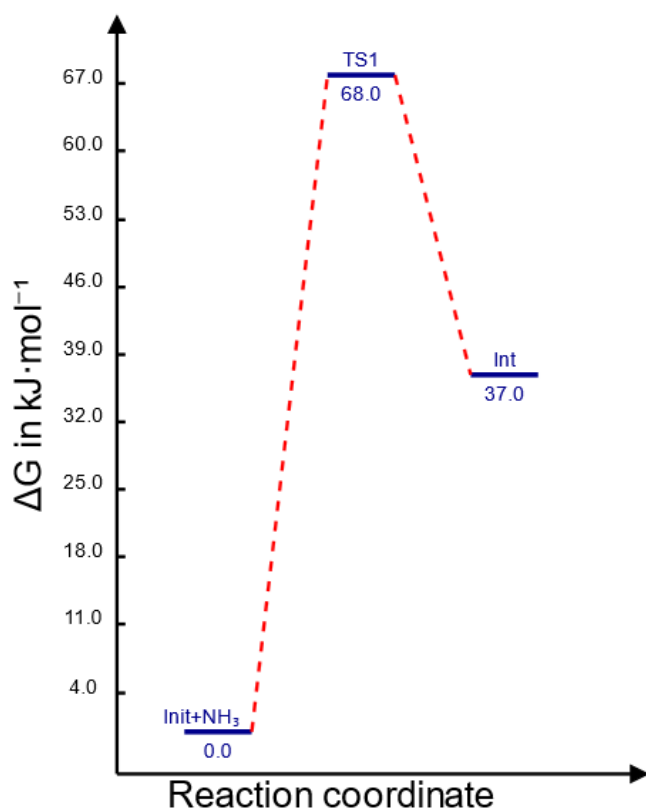

**Figure S1.** Energy profile of ammonia nucleophilic addition to nitrilium derivatives of *closo*-dodecaborate anion  $[\text{B}_{12}\text{H}_{11}\text{NCCH}_3]^-$  with formation  $[\text{B}_{12}\text{H}_{11}\text{NCCH}_3\text{NH}_3]^-$  (Int) in tetrahydrofuran solution.

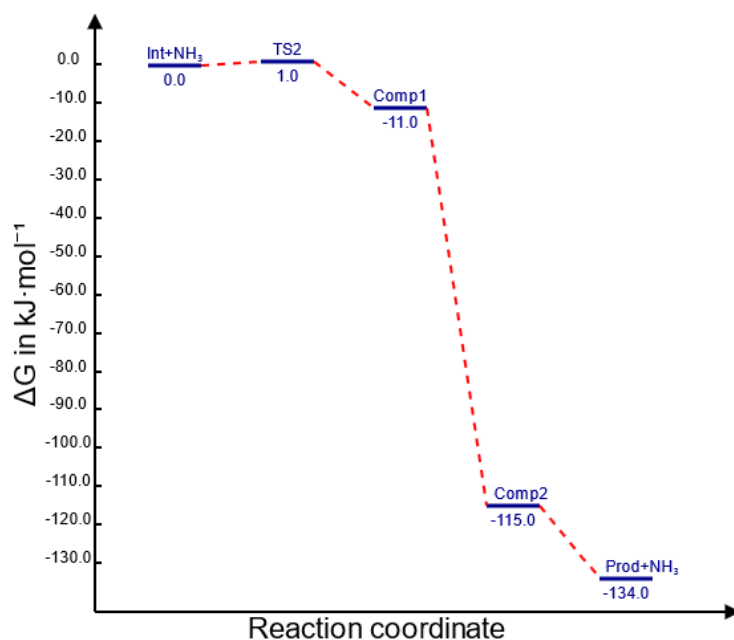

**Figure S2.** Energy profile of isomerisation of  $[\text{B}_{12}\text{H}_{11}\text{NCCH}_3\text{NH}_3]^-$  (Int) to  $[\text{B}_{12}\text{H}_{11}\text{NHCCH}_3\text{NH}_2]^-$  (Prod) in tetrahydrofuran solution.

**Table S1.** Main parameters of non-covalent intermolecular dihydrogen H–H interaction in  $[\text{B}_{12}\text{H}_{11}\text{NHCCH}_3\text{NH}_2]^-$ : bond lengths, Wiberg index, and main topological parameters of electron density for B–C interactions.  $\rho(r)$  – electron density at the bcp,  $\nabla^2\rho(r)$  – Laplacian of electron density at the bcp,  $H_b$  – total energy at the bcp,  $\delta(\text{B–C})$  – delocalisation index,  $\varepsilon_b$  – ellipticity at the bcp.

| H–H Length<br>(Å) | Wiberg Index | $\rho(r)$<br>( $\text{e } \text{\AA}^{-3}$ ) | $\nabla^2\rho(r)$ ( $\text{e } \text{\AA}^{-5}$ ) | $H_b$<br>( $\text{h e}^{-1}$ ) | $\delta(\text{B–H})$ | $\varepsilon_b$ |
|-------------------|--------------|----------------------------------------------|---------------------------------------------------|--------------------------------|----------------------|-----------------|
| 1.66              | 0.02         | 0.026                                        | 0.060                                             | -0.007                         | 0.782                | 0.075           |

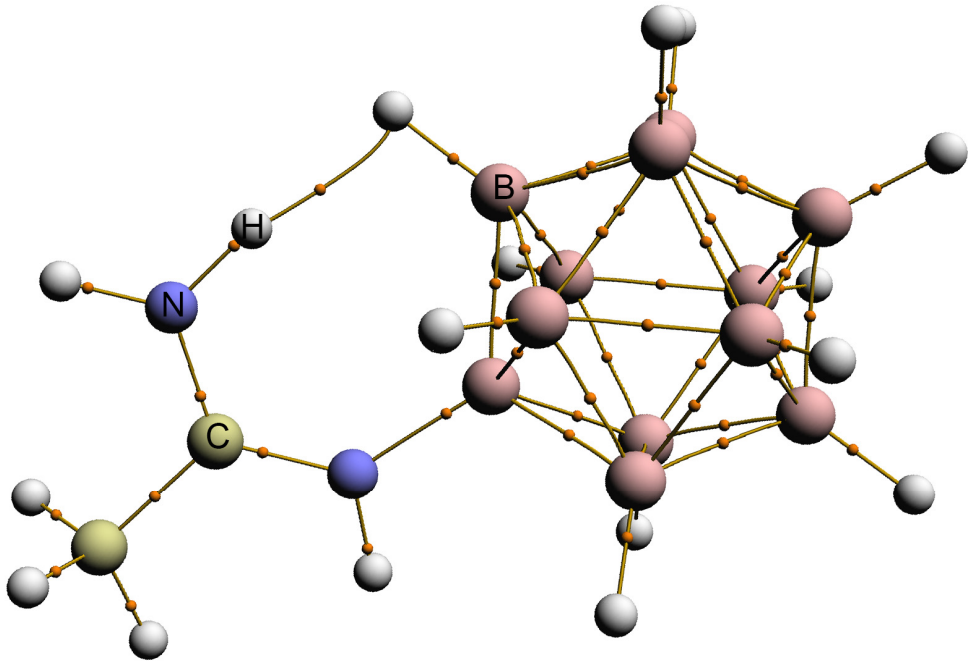

**Figure S3.** Molecular graphs for  $[\text{B}_{12}\text{H}_{11}\text{NHCCH}_3\text{NH}_2]^-$  anion. B–All bond critical points are indicated by small orange circles.

**Table S2.** Cartesian atomic coordinates of the calculated optimised equilibrium model structures. All coordinates are given in Angstrom units.

**Gas Phase:**

| Compound                                                  | Atom | x        | y         | z        |
|-----------------------------------------------------------|------|----------|-----------|----------|
| $[\text{B}_{12}\text{H}_{11}\text{NHCCH}_3\text{NH}_2]^-$ | N    | 4.329892 | 13.546046 | 2.147225 |
|                                                           | H    | 4.252686 | 13.308663 | 1.167292 |
|                                                           | N    | 3.245166 | 13.649785 | 4.162364 |
|                                                           | H    | 4.086469 | 14.046572 | 4.591482 |
|                                                           | C    | 3.25947  | 13.362999 | 2.85905  |
|                                                           | C    | 2.003253 | 12.80527  | 2.251699 |
|                                                           | H    | 2.093717 | 12.726471 | 1.167202 |
|                                                           | H    | 1.148478 | 13.445821 | 2.485761 |
|                                                           | H    | 1.810703 | 11.807254 | 2.656689 |
|                                                           | B    | 6.809825 | 14.570724 | 1.317888 |
|                                                           | H    | 6.396126 | 14.668846 | 0.1889   |
|                                                           | B    | 5.742389 | 13.984592 | 2.588393 |
|                                                           | B    | 7.074309 | 12.960589 | 2.051661 |

|   |           |           |          |
|---|-----------|-----------|----------|
| H | 6.845839  | 11.954761 | 1.428414 |
| B | 8.452983  | 14.035731 | 1.732458 |
| H | 9.260057  | 13.77892  | 0.881534 |
| B | 7.939154  | 15.715323 | 2.069893 |
| H | 8.381238  | 16.65105  | 1.461669 |
| B | 6.237     | 15.684184 | 2.595908 |
| H | 5.443729  | 16.555924 | 2.355955 |
| B | 6.162378  | 14.755983 | 4.122893 |
| H | 5.360504  | 15.031264 | 4.98879  |
| B | 6.666015  | 13.069948 | 3.79047  |
| H | 6.169783  | 12.142486 | 4.37795  |
| B | 8.36583   | 13.112668 | 3.259795 |
| H | 9.110038  | 12.201464 | 3.497924 |
| B | 8.900945  | 14.814171 | 3.272139 |
| H | 10.035542 | 15.113373 | 3.525467 |
| B | 7.535975  | 15.829789 | 3.804894 |
| H | 7.689539  | 16.840375 | 4.434338 |
| B | 7.798968  | 14.218458 | 4.540557 |

**Water Solution:**

| Compound                                                                           | Atom | x        | y         | z         |
|------------------------------------------------------------------------------------|------|----------|-----------|-----------|
| [B <sub>12</sub> H <sub>11</sub> NCCH <sub>3</sub> ] <sup>-</sup><br>Init          | N    | 4.27857  | 13.825562 | 2.008663  |
|                                                                                    | C    | 3.192122 | 13.588097 | 1.724496  |
|                                                                                    | C    | 1.827647 | 13.291283 | 1.36682   |
|                                                                                    | H    | 1.815177 | 12.846079 | 0.370157  |
|                                                                                    | H    | 1.251941 | 14.219052 | 1.371584  |
|                                                                                    | H    | 1.417491 | 12.590826 | 2.097168  |
|                                                                                    | B    | 6.83808  | 14.714404 | 1.159719  |
|                                                                                    | H    | 6.496149 | 14.874442 | 0.022491  |
|                                                                                    | B    | 5.70478  | 14.133825 | 2.382026  |
|                                                                                    | B    | 7.010441 | 13.072051 | 1.853454  |
|                                                                                    | H    | 6.789391 | 12.093697 | 1.198479  |
|                                                                                    | B    | 8.439797 | 14.103231 | 1.626902  |
|                                                                                    | H    | 9.273766 | 13.841437 | 0.805365  |
|                                                                                    | B    | 7.979797 | 15.784969 | 2.000005  |
|                                                                                    | H    | 8.485528 | 16.719425 | 1.442701  |
|                                                                                    | B    | 6.263352 | 15.805182 | 2.459025  |
|                                                                                    | H    | 5.527399 | 16.718861 | 2.217642  |
|                                                                                    | B    | 6.080008 | 14.838362 | 3.955461  |
|                                                                                    | H    | 5.216742 | 15.084492 | 4.748741  |
|                                                                                    | B    | 6.542827 | 13.148891 | 3.581114  |
|                                                                                    | H    | 6.001074 | 12.223166 | 4.115133  |
|                                                                                    | B    | 8.25738  | 13.141269 | 3.116168  |
|                                                                                    | H    | 8.961058 | 12.198538 | 3.350057  |
|                                                                                    | B    | 8.858228 | 14.81403  | 3.204704  |
|                                                                                    | H    | 9.994597 | 15.059434 | 3.503049  |
|                                                                                    | B    | 7.513707 | 15.861345 | 3.719044  |
|                                                                                    | H    | 7.69272  | 16.848407 | 4.376707  |
|                                                                                    | B    | 7.685573 | 14.227174 | 4.409419  |
|                                                                                    | H    | 7.986495 | 14.053066 | 5.557808  |
| NH <sub>3</sub>                                                                    | N    | N        | 2.053076  | 23.982834 |
|                                                                                    | H    | H        | 2.053144  | 24.923379 |
|                                                                                    | H    | H        | 2.867812  | 23.512607 |
|                                                                                    | H    | H        | 1.238387  | 23.512556 |
| [B <sub>12</sub> H <sub>11</sub> NCCH <sub>3</sub> *NH <sub>3</sub> ] <sup>-</sup> | N    | 4.109332 | 13.99683  | 2.453639  |

|                                                                                          |   |          |           |           |
|------------------------------------------------------------------------------------------|---|----------|-----------|-----------|
| TS1                                                                                      | C | 3.208373 | 13.645886 | 1.786348  |
|                                                                                          | C | 1.767798 | 13.465072 | 1.603273  |
|                                                                                          | H | 1.433899 | 14.042019 | 0.739017  |
|                                                                                          | H | 1.262023 | 13.81383  | 2.505866  |
|                                                                                          | H | 1.547988 | 12.40976  | 1.433108  |
|                                                                                          | B | 6.660539 | 14.771388 | 1.457281  |
|                                                                                          | H | 6.260986 | 14.948349 | 0.339089  |
|                                                                                          | B | 5.559768 | 14.240367 | 2.744028  |
|                                                                                          | B | 6.805402 | 13.131035 | 2.141421  |
|                                                                                          | H | 6.510494 | 12.159249 | 1.501388  |
|                                                                                          | B | 8.263002 | 14.096861 | 1.823872  |
|                                                                                          | H | 9.033562 | 13.799671 | 0.952925  |
|                                                                                          | B | 7.894949 | 15.794807 | 2.218445  |
|                                                                                          | H | 8.403935 | 16.708466 | 1.628738  |
|                                                                                          | B | 6.211154 | 15.88358  | 2.784794  |
|                                                                                          | H | 5.508472 | 16.835115 | 2.585719  |
|                                                                                          | B | 6.084024 | 14.931401 | 4.288831  |
|                                                                                          | H | 5.289077 | 15.217899 | 5.139883  |
|                                                                                          | B | 6.445405 | 13.229198 | 3.891063  |
|                                                                                          | H | 5.907461 | 12.322997 | 4.464233  |
|                                                                                          | B | 8.128746 | 13.144252 | 3.323192  |
|                                                                                          | H | 8.804343 | 12.171057 | 3.517665  |
|                                                                                          | B | 8.807242 | 14.789781 | 3.369732  |
|                                                                                          | H | 9.970076 | 14.986998 | 3.596662  |
|                                                                                          | B | 7.542388 | 15.891939 | 3.962828  |
|                                                                                          | H | 7.80464  | 16.87189  | 4.60436   |
|                                                                                          | B | 7.686732 | 14.254432 | 4.645774  |
|                                                                                          | H | 8.053212 | 14.066742 | 5.773503  |
|                                                                                          | N | 3.889351 | 12.923745 | -0.047466 |
|                                                                                          | H | 4.366605 | 13.695677 | -0.505668 |
|                                                                                          | H | 3.209245 | 12.534587 | -0.694779 |
|                                                                                          | H | 4.584005 | 12.21124  | 0.161174  |
| [B <sub>12</sub> H <sub>11</sub> NCCH <sub>3</sub> NH <sub>3</sub> ] <sup>-</sup><br>Int | N | 3.949068 | 14.108182 | 2.62632   |
|                                                                                          | C | 3.289415 | 13.624935 | 1.681534  |
|                                                                                          | C | 1.804236 | 13.528031 | 1.569705  |
|                                                                                          | H | 1.454666 | 14.010362 | 0.65064   |
|                                                                                          | H | 1.342702 | 14.012311 | 2.42963   |
|                                                                                          | H | 1.491068 | 12.479111 | 1.535277  |
|                                                                                          | B | 6.539763 | 14.795898 | 1.469171  |
|                                                                                          | H | 6.117137 | 15.001561 | 0.362814  |
|                                                                                          | B | 5.442871 | 14.260941 | 2.77655   |
|                                                                                          | B | 6.682288 | 13.148782 | 2.122874  |
|                                                                                          | H | 6.384857 | 12.17507  | 1.479086  |
|                                                                                          | B | 8.144362 | 14.088141 | 1.763782  |
|                                                                                          | H | 8.874773 | 13.789057 | 0.859328  |
|                                                                                          | B | 7.820183 | 15.783127 | 2.19902   |
|                                                                                          | H | 8.324888 | 16.697178 | 1.605269  |
|                                                                                          | B | 6.158415 | 15.888253 | 2.827036  |
|                                                                                          | H | 5.474586 | 16.862818 | 2.669885  |
|                                                                                          | B | 6.071569 | 14.917588 | 4.313119  |
|                                                                                          | H | 5.31706  | 15.206018 | 5.201248  |
|                                                                                          | B | 6.378082 | 13.221793 | 3.877222  |
|                                                                                          | H | 5.85233  | 12.311376 | 4.457327  |
|                                                                                          | B | 8.043361 | 13.111729 | 3.251654  |
|                                                                                          | H | 8.704317 | 12.120548 | 3.402825  |
|                                                                                          | B | 8.756804 | 14.74233  | 3.298812  |

|                                                                                                        |   |           |           |           |
|--------------------------------------------------------------------------------------------------------|---|-----------|-----------|-----------|
|                                                                                                        | H | 9.931302  | 14.912814 | 3.485661  |
|                                                                                                        | B | 7.534742  | 15.855842 | 3.954911  |
|                                                                                                        | H | июл.85    | 16.820569 | 4.602151  |
|                                                                                                        | B | 7.670591  | 14.206921 | 4.604874  |
|                                                                                                        | H | 8.073524  | 13.991671 | 5.715658  |
|                                                                                                        | N | 3.965068  | 13.057398 | 0.453281  |
|                                                                                                        | H | 3.969826  | 13.749692 | -0.301856 |
|                                                                                                        | H | 3.477618  | 12.228429 | 0.106024  |
|                                                                                                        | H | 4.938489  | 12.799536 | 0.662484  |
|                                                                                                        |   |           |           |           |
| [B <sub>12</sub> H <sub>11</sub> NCCH <sub>3</sub> NH <sub>3</sub> *NH <sub>3</sub> ]-<br><b>TS2</b>   | N | 4.090432  | 14.38008  | 2.64598   |
|                                                                                                        | C | 3.441131  | 13.974575 | 1.645227  |
|                                                                                                        | C | 1.947479  | 13.889263 | 1.570494  |
|                                                                                                        | H | 1.570746  | 14.476952 | 0.725249  |
|                                                                                                        | H | 1.508516  | 14.266258 | 2.494016  |
|                                                                                                        | H | 1.629435  | 12.852448 | 1.415203  |
|                                                                                                        | B | 6.725704  | 15.092852 | 1.540539  |
|                                                                                                        | H | 6.346447  | 15.358146 | 0.432448  |
|                                                                                                        | B | 5.584295  | 14.518851 | 2.798961  |
|                                                                                                        | B | 6.825599  | 13.417003 | 2.124606  |
|                                                                                                        | H | 6.523911  | 12.479494 | 1.432028  |
|                                                                                                        | B | 8.311184  | 14.34734  | 1.838733  |
|                                                                                                        | H | 9.057523  | 14.076621 | 0.937369  |
|                                                                                                        | B | 8.004683  | 16.027249 | 2.338669  |
|                                                                                                        | H | 8.537144  | 16.957261 | 1.794442  |
|                                                                                                        | B | 6.330277  | 16.131601 | 2.93318   |
|                                                                                                        | H | 5.667638  | 17.125863 | 2.804425  |
|                                                                                                        | B | 6.199856  | 15.101349 | 4.374449  |
|                                                                                                        | H | 5.432565  | 15.364143 | 5.260526  |
|                                                                                                        | B | 6.490688  | 13.422839 | 3.873734  |
|                                                                                                        | H | 5.940347  | 12.497338 | 4.407382  |
|                                                                                                        | B | 8.165555  | 13.311206 | 3.279743  |
|                                                                                                        | H | 8.809585  | 12.304374 | 3.402257  |
|                                                                                                        | B | 8.902881  | 14.926902 | 3.411269  |
|                                                                                                        | H | 10.076373 | 15.072369 | 3.626361  |
|                                                                                                        | B | 7.682438  | 16.031002 | 4.088053  |
|                                                                                                        | H | 7.987076  | 16.963236 | 4.781669  |
|                                                                                                        | B | 7.782216  | 14.354585 | 4.670283  |
|                                                                                                        | H | 8.15753   | 14.087748 | 5.780386  |
|                                                                                                        | N | 4.073633  | 13.594234 | 0.376856  |
|                                                                                                        | H | 4.085307  | 14.544477 | -0.339636 |
|                                                                                                        | H | 3.55911   | 12.847742 | -0.090659 |
|                                                                                                        | H | 5.036148  | 13.284268 | 0.525771  |
|                                                                                                        | N | 4.073456  | 15.71026  | -1.149906 |
|                                                                                                        | H | 4.768369  | 15.635635 | -1.889121 |
|                                                                                                        | H | 4.299087  | 16.540567 | -0.607401 |
|                                                                                                        | H | 3.170375  | 15.865927 | -1.591051 |
|                                                                                                        |   |           |           |           |
| [B <sub>12</sub> H <sub>11</sub> NCCH <sub>3</sub> NH <sub>2</sub> *NH <sub>4</sub> ]-<br><b>Comp1</b> | N | 4.069523  | 14.167713 | 2.486378  |
|                                                                                                        | C | 3.447925  | 13.713125 | 1.470484  |
|                                                                                                        | C | 1.95546   | 13.510001 | 1.477223  |
|                                                                                                        | H | 1.483192  | 14.04453  | 0.645398  |
|                                                                                                        | H | 1.534064  | 13.86636  | 2.41744   |
|                                                                                                        | H | 1.716957  | 12.44698  | 1.358684  |
|                                                                                                        | B | 6.774768  | 14.732906 | 1.349267  |
|                                                                                                        | H | 6.492619  | 14.776381 | 0.183025  |
|                                                                                                        | B | 5.549285  | 14.391525 | 2.630385  |



|                                                                                                                     |   |           |           |           |
|---------------------------------------------------------------------------------------------------------------------|---|-----------|-----------|-----------|
|                                                                                                                     | B | 6.836713  | 13.201266 | 2.248495  |
|                                                                                                                     | H | 6.565001  | 12.151034 | 1.727044  |
|                                                                                                                     | B | 8.338554  | 14.080111 | 1.870956  |
|                                                                                                                     | H | 9.13485   | 13.656917 | 1.077359  |
|                                                                                                                     | B | 8.003411  | 15.822347 | 2.015585  |
|                                                                                                                     | H | 8.563359  | 16.63142  | 1.325672  |
|                                                                                                                     | B | 6.298124  | 16.011993 | 2.487714  |
|                                                                                                                     | H | 5.644182  | 16.968123 | 2.149068  |
|                                                                                                                     | B | 6.093926  | 15.280161 | 4.090081  |
|                                                                                                                     | H | 5.280537  | 15.698351 | 4.869108  |
|                                                                                                                     | B | 6.420214  | 13.543681 | 3.943681  |
|                                                                                                                     | H | 5.84055   | 12.739201 | 4.623309  |
|                                                                                                                     | B | 8.120188  | 13.341299 | 3.472459  |
|                                                                                                                     | H | 8.765986  | 12.389301 | 3.819712  |
|                                                                                                                     | B | 8.844992  | 14.963754 | 3.327018  |
|                                                                                                                     | H | 10.004964 | 15.166898 | 3.568317  |
|                                                                                                                     | B | 7.585535  | 16.161863 | 3.71      |
|                                                                                                                     | H | 7.846935  | 17.216082 | 4.224374  |
|                                                                                                                     | B | 7.660876  | 14.630807 | 4.610231  |
|                                                                                                                     | H | 7.973061  | 14.592565 | 5.770537  |
|                                                                                                                     | N | 4.031742  | 13.433428 | 0.222101  |
|                                                                                                                     | H | 4.142254  | 15.25747  | -0.300528 |
|                                                                                                                     | H | 3.500532  | 12.800394 | -0.36338  |
|                                                                                                                     | H | 5.015047  | 13.189372 | 0.259467  |
|                                                                                                                     | N | 4.264608  | 16.293637 | -0.303011 |
|                                                                                                                     | H | 4.823463  | 16.567151 | -1.110861 |
|                                                                                                                     | H | 4.757823  | 16.575309 | 0.551328  |
|                                                                                                                     | H | 3.360961  | 16.763212 | -0.345652 |
|                                                                                                                     |   |           |           |           |
| [B <sub>12</sub> H <sub>11</sub> NHCCH <sub>3</sub> NH <sub>2</sub> *NH <sub>3</sub> ] <sup>-</sup><br><b>Comp2</b> | N | 4.121121  | 14.440067 | 1.977155  |
|                                                                                                                     | C | 3.490593  | 13.62336  | 1.171839  |
|                                                                                                                     | C | 2.036438  | 13.823734 | 0.885084  |
|                                                                                                                     | H | 1.89583   | 13.991086 | -0.186082 |
|                                                                                                                     | H | 1.643842  | 14.679411 | 1.433911  |
|                                                                                                                     | H | 1.476272  | 12.927883 | 1.165645  |
|                                                                                                                     | B | 6.904711  | 14.673159 | 1.168615  |
|                                                                                                                     | H | 6.680758  | 14.604001 | -0.009104 |
|                                                                                                                     | B | 5.593369  | 14.522246 | 2.361111  |
|                                                                                                                     | B | 6.808866  | 13.231105 | 2.217954  |
|                                                                                                                     | H | 6.556815  | 12.139123 | 1.785353  |
|                                                                                                                     | B | 8.377242  | 13.999346 | 1.899853  |
|                                                                                                                     | H | 9.213641  | 13.453783 | 1.232901  |
|                                                                                                                     | B | 8.136304  | 15.761014 | 1.854384  |
|                                                                                                                     | H | 8.808644  | 16.470837 | 1.155735  |
|                                                                                                                     | B | 6.413729  | 16.084289 | 2.13861   |
|                                                                                                                     | H | 5.827511  | 17.011303 | 1.648092  |
|                                                                                                                     | B | 6.010569  | 15.512636 | 3.776458  |
|                                                                                                                     | H | 5.149454  | 16.042859 | 4.422963  |
|                                                                                                                     | B | 6.251568  | 13.749598 | 3.82599   |
|                                                                                                                     | H | 5.560077  | 13.042057 | 4.50713   |
|                                                                                                                     | B | 7.976396  | 13.429472 | 3.540392  |
|                                                                                                                     | H | 8.531349  | 12.48228  | 4.027578  |
|                                                                                                                     | B | 8.798146  | 14.991424 | 3.315998  |
|                                                                                                                     | H | 9.939248  | 15.158435 | 3.651356  |
|                                                                                                                     | B | 7.580557  | 16.280197 | 3.462637  |
|                                                                                                                     | H | 7.852155  | 17.362243 | 3.906972  |
|                                                                                                                     | B | 7.483255  | 14.839414 | 4.505009  |

|                                                                                                   |   |          |           |          |
|---------------------------------------------------------------------------------------------------|---|----------|-----------|----------|
|                                                                                                   | H | 7.683367 | 14.903289 | 5.687768 |
|                                                                                                   | N | 4.094034 | 12.600056 | 0.572293 |
|                                                                                                   | H | 3.532886 | 15.208845 | 2.344481 |
|                                                                                                   | H | 3.56425  | 11.985451 | -0.02629 |
|                                                                                                   | H | 5.06697  | 12.389632 | 0.753004 |
|                                                                                                   | N | 2.681937 | 16.762428 | 3.010649 |
|                                                                                                   | H | 1.814848 | 17.118708 | 2.619624 |
|                                                                                                   | H | 3.395412 | 17.469448 | 2.853778 |
|                                                                                                   | H | 2.553017 | 16.698926 | 4.016546 |
|                                                                                                   |   |          |           |          |
| [B <sub>12</sub> H <sub>11</sub> NHCCH <sub>3</sub> NH <sub>2</sub> ] <sup>-</sup><br><b>Prod</b> | N | 4.144857 | 14.033897 | 2.288244 |
|                                                                                                   | H | 3.809372 | 14.433109 | 1.42069  |
|                                                                                                   | N | 3.533721 | 12.628864 | 4.016461 |
|                                                                                                   | H | 4.432557 | 12.72179  | 4.47023  |
|                                                                                                   | C | 3.271168 | 13.245554 | 2.872111 |
|                                                                                                   | C | 1.927743 | 13.023457 | 2.25849  |
|                                                                                                   | H | 1.764191 | 11.954394 | 2.103136 |
|                                                                                                   | H | 1.841679 | 13.542232 | 1.304307 |
|                                                                                                   | H | 1.155203 | 13.393289 | 2.937451 |
|                                                                                                   | B | 6.467075 | 15.490424 | 1.610148 |
|                                                                                                   | H | 5.992495 | 15.818246 | 0.556706 |
|                                                                                                   | B | 5.547054 | 14.460259 | 2.719264 |
|                                                                                                   | B | 6.987431 | 13.811629 | 1.902137 |
|                                                                                                   | H | 6.886156 | 12.968956 | 1.053096 |
|                                                                                                   | B | 8.190746 | 15.115851 | 1.824358 |
|                                                                                                   | H | 8.972706 | 15.194697 | 0.916037 |
|                                                                                                   | B | 7.490404 | 16.563983 | 2.589634 |
|                                                                                                   | H | 7.774488 | 17.671956 | 2.223801 |
|                                                                                                   | B | 5.852931 | 16.158703 | 3.143258 |
|                                                                                                   | H | 4.955859 | 16.95671  | 3.159191 |
|                                                                                                   | B | 5.984659 | 14.89138  | 4.38598  |
|                                                                                                   | H | 5.190651 | 14.806013 | 5.282768 |
|                                                                                                   | B | 6.688688 | 13.438238 | 3.616647 |
|                                                                                                   | H | 6.399972 | 12.330037 | 3.978229 |
|                                                                                                   | B | 8.326638 | 13.850002 | 3.066722 |
|                                                                                                   | H | 9.20209  | 13.027846 | 3.044288 |
|                                                                                                   | B | 8.639687 | 15.547276 | 3.491719 |
|                                                                                                   | H | 9.742758 | 15.931871 | 3.769569 |
|                                                                                                   | B | 7.194691 | 16.19108  | 4.304191 |
|                                                                                                   | H | 7.26467  | 17.033073 | 5.157993 |
|                                                                                                   | B | 7.707165 | 14.512094 | 4.599514 |
|                                                                                                   | H | 8.144664 | 14.161717 | 5.661362 |
|                                                                                                   | H | 2.839264 | 12.028885 | 4.434577 |

**Tetrahydrofuran Solution:**

| Compound                                                                         | Atom | x        | y         | z        |
|----------------------------------------------------------------------------------|------|----------|-----------|----------|
| [B <sub>12</sub> H <sub>11</sub> NCCH <sub>3</sub> ] <sup>-</sup><br><b>Init</b> | N    | 4.282256 | 13.826371 | 2.009571 |
|                                                                                  | C    | 3.197042 | 13.58918  | 1.725937 |
|                                                                                  | C    | 1.829079 | 13.291858 | 1.367813 |
|                                                                                  | H    | 1.81295  | 12.847319 | 0.370681 |
|                                                                                  | H    | 1.250663 | 14.218212 | 1.37299  |
|                                                                                  | H    | 1.416548 | 12.590618 | 2.096383 |
|                                                                                  | B    | 6.839053 | 14.715084 | 1.158854 |
|                                                                                  | H    | 6.494481 | 14.873757 | 0.0203   |
|                                                                                  | B    | 5.708898 | 14.134723 | 2.382833 |
|                                                                                  | B    | 7.011233 | 13.071784 | 1.852753 |
|                                                                                  |      |          |           |          |
|                                                                                  |      |          |           |          |

|                                                                                           |   |          |           |                    |
|-------------------------------------------------------------------------------------------|---|----------|-----------|--------------------|
|                                                                                           | H | 6.788596 | 12.091723 | 1.197569           |
|                                                                                           | B | 8.440591 | 14.103166 | 1.626194           |
|                                                                                           | H | 9.274796 | 13.840621 | 0.803711           |
|                                                                                           | B | 7.98016  | 15.785716 | 1.999686           |
|                                                                                           | H | 8.485719 | 16.720922 | 1.441377           |
|                                                                                           | B | 6.263713 | 15.805968 | 2.45889            |
|                                                                                           | H | 5.524351 | 16.719084 | 2.21675            |
|                                                                                           | B | 6.080108 | 14.838533 | 3.955645           |
|                                                                                           | H | 5.213871 | 15.083628 | 4.748803           |
|                                                                                           | B | 6.543092 | 13.148233 | 3.581091           |
|                                                                                           | H | 5.998352 | 12.221982 | 4.115241           |
|                                                                                           | B | 8.257666 | 13.140353 | 3.115873           |
|                                                                                           | H | 8.961307 | 12.196589 | 3.350644           |
|                                                                                           | B | 8.858053 | 14.814031 | 3.204731           |
|                                                                                           | H | 9.995059 | 15.059505 | 3.503951           |
|                                                                                           | B | 7.513241 | 15.861855 | 3.71909            |
|                                                                                           | H | 7.690883 | 16.849919 | 4.377451           |
|                                                                                           | B | 7.685197 | 14.227075 | 4.40978            |
|                                                                                           | H | 7.984882 | 14.052786 | 5.55951            |
|                                                                                           |   |          |           |                    |
| NH <sub>3</sub>                                                                           | N | 2.053074 | 23.982792 | 5.575194           |
|                                                                                           | H | 2.053144 | 24.925637 | 5.951753           |
|                                                                                           | H | 2.869856 | 23.511498 | 5.951738           |
|                                                                                           | H | 1.236346 | 23.511449 | 5.951723           |
|                                                                                           |   |          |           |                    |
| [B <sub>12</sub> H <sub>11</sub> NCCH <sub>3</sub> *NH <sub>3</sub> ] <sup>-</sup><br>TS1 | N | 4.104378 | 13.988191 | 2.46322            |
|                                                                                           | C | 3.212862 | 13.639504 | 1.782925           |
|                                                                                           | C | 1.770038 | 13.453973 | 1.598152           |
|                                                                                           | H | 1.430894 | 14.040013 | 0.741555           |
|                                                                                           | H | 1.260365 | 13.78855  | 2.504182           |
|                                                                                           | H | 1.552707 | 12.399711 | 1.415835           |
|                                                                                           | B | 6.65123  | 14.75803  | 1.456031           |
|                                                                                           | H | 6.248388 | 14.932291 | 0.336428           |
|                                                                                           | B | 5.557078 | 14.234585 | φ <sub>ев.09</sub> |
|                                                                                           | B | 6.798126 | 13.121291 | 2.148414           |
|                                                                                           | H | 6.502127 | 12.142347 | 1.515646           |
|                                                                                           | B | 8.254564 | 14.084938 | 1.819986           |
|                                                                                           | H | 9.021206 | 13.782087 | 0.946117           |
|                                                                                           | B | 7.887524 | 15.78546  | 2.207005           |
|                                                                                           | H | 8.393439 | 16.696546 | 1.608954           |
|                                                                                           | B | 6.205375 | 15.877649 | 2.779256           |
|                                                                                           | H | 5.499092 | 16.8274   | 2.575847           |
|                                                                                           | B | 6.083589 | 14.933118 | 4.289579           |
|                                                                                           | H | 5.288525 | 15.223483 | 5.140918           |
|                                                                                           | B | 6.443323 | 13.228162 | 3.89931            |
|                                                                                           | H | 5.904423 | 12.323941 | 4.477583           |
|                                                                                           | B | 8.124823 | 13.139902 | 3.325361           |
|                                                                                           | H | 8.800169 | 12.165816 | 3.521853           |
|                                                                                           | B | 8.803476 | 14.785986 | 3.360683           |
|                                                                                           | H | 9.967927 | 14.984088 | 3.58237            |
|                                                                                           | B | 7.540827 | 15.891869 | 3.952715           |
|                                                                                           | H | 7.804777 | 16.87622  | 4.588299           |
|                                                                                           | B | 7.687507 | 14.257474 | 4.643948           |
|                                                                                           | H | 8.057587 | 14.074898 | 5.772158           |
|                                                                                           | N | 3.907039 | 12.963761 | -0.029771          |
|                                                                                           | H | 4.36623  | 13.754624 | -0.475236          |

|                                                                                                                  |   |          |           |           |
|------------------------------------------------------------------------------------------------------------------|---|----------|-----------|-----------|
|                                                                                                                  | H | 3.257433 | 12.552587 | -0.695201 |
|                                                                                                                  | H | 4.62718  | 12.277628 | 0.184919  |
|                                                                                                                  |   |          |           |           |
| [B <sub>12</sub> H <sub>11</sub> NCCH <sub>3</sub> NH <sub>3</sub> ] <sup>-</sup><br><b>Int</b>                  | N | 3.948049 | 14.110267 | 2.628672  |
|                                                                                                                  | C | 3.291063 | 13.629303 | 1.69038   |
|                                                                                                                  | C | 1.803963 | 13.520375 | 1.569051  |
|                                                                                                                  | H | 1.451465 | 13.997018 | 0.647571  |
|                                                                                                                  | H | 1.339803 | 14.00833  | 2.426177  |
|                                                                                                                  | H | 1.492496 | 12.470311 | 1.542994  |
|                                                                                                                  | B | 6.53383  | 14.798314 | 1.469741  |
|                                                                                                                  | H | 6.109691 | 15.00679  | 0.361971  |
|                                                                                                                  | B | 5.44193  | 14.26743  | 2.78208   |
|                                                                                                                  | B | 6.674079 | 13.151438 | 2.123226  |
|                                                                                                                  | H | 6.373593 | 12.174766 | 1.479805  |
|                                                                                                                  | B | 8.137155 | 14.086003 | 1.759558  |
|                                                                                                                  | H | 8.862967 | 13.78412  | 0.850854  |
|                                                                                                                  | B | 7.817323 | 15.78215  | 2.196022  |
|                                                                                                                  | H | 8.32206  | 16.695319 | 1.599284  |
|                                                                                                                  | B | 6.156578 | 15.892264 | 2.82871   |
|                                                                                                                  | H | 5.472549 | 16.867919 | 2.671404  |
|                                                                                                                  | B | 6.071328 | 14.920884 | 4.316208  |
|                                                                                                                  | H | 5.316582 | 15.209877 | 5.204812  |
|                                                                                                                  | B | 6.372678 | 13.223321 | 3.878649  |
|                                                                                                                  | H | 5.841797 | 12.313089 | 4.456766  |
|                                                                                                                  | B | 8.036618 | 13.108918 | 3.248077  |
|                                                                                                                  | H | 8.694182 | 12.113912 | 3.395845  |
|                                                                                                                  | B | 8.753904 | 14.738278 | 3.293584  |
|                                                                                                                  | H | 9.930128 | 14.905647 | 3.476536  |
|                                                                                                                  | B | 7.536145 | 15.855059 | 3.95316   |
|                                                                                                                  | H | 7.843801 | 16.819992 | 4.599415  |
|                                                                                                                  | B | 7.669625 | 14.20515  | 4.602717  |
|                                                                                                                  | H | 8.074316 | 13.987635 | 5.713107  |
|                                                                                                                  | N | 3.982147 | 13.064933 | 0.45735   |
|                                                                                                                  | H | 4.012168 | 13.75878  | -0.294903 |
|                                                                                                                  | H | 3.502162 | 12.238141 | 0.096221  |
|                                                                                                                  | H | 4.95229  | 12.802277 | 0.688271  |
|                                                                                                                  |   |          |           |           |
| [B <sub>12</sub> H <sub>11</sub> NCCH <sub>3</sub> NH <sub>3</sub> *NH <sub>3</sub> ] <sup>-</sup><br><b>TS2</b> | N | 4.083629 | 14.351041 | 2.640146  |
|                                                                                                                  | C | 3.432547 | 13.948004 | 1.646824  |
|                                                                                                                  | C | 1.935203 | 13.836534 | 1.590607  |
|                                                                                                                  | H | 1.532479 | 14.424126 | 0.756698  |
|                                                                                                                  | H | 1.508199 | 14.201804 | 2.525091  |
|                                                                                                                  | H | 1.627096 | 12.795907 | 1.43735   |
|                                                                                                                  | B | 6.719442 | 15.064508 | 1.519561  |
|                                                                                                                  | H | июн.42   | 15.313583 | 0.401668  |
|                                                                                                                  | B | 5.57667  | 14.508703 | 2.786538  |
|                                                                                                                  | B | 6.818611 | 13.398556 | 2.128371  |
|                                                                                                                  | H | июн.63   | 12.448961 | 1.448358  |
|                                                                                                                  | B | 8.304363 | 14.326442 | 1.83041   |
|                                                                                                                  | H | 9.050963 | 14.042953 | 0.931402  |
|                                                                                                                  | B | 7.993457 | 16.014175 | 2.303098  |
|                                                                                                                  | H | 8.523258 | 16.936997 | 1.741573  |
|                                                                                                                  | B | 6.316419 | 16.125137 | 2.893097  |
|                                                                                                                  | H | 5.650113 | 17.116207 | 2.743885  |
|                                                                                                                  | B | 6.186701 | 15.117731 | 4.351793  |

|                                                                                                                    |   |           |           |           |
|--------------------------------------------------------------------------------------------------------------------|---|-----------|-----------|-----------|
|                                                                                                                    | H | 5.415096  | 15.392723 | 5.231368  |
|                                                                                                                    | B | 6.48188   | 13.431355 | map.78    |
|                                                                                                                    | H | 5.929796  | 12.512677 | 4.423748  |
|                                                                                                                    | B | 8.157498  | 13.312978 | 3.287093  |
|                                                                                                                    | H | 8.802719  | 12.307805 | 3.425833  |
|                                                                                                                    | B | 8.892086  | 14.932563 | 3.394281  |
|                                                                                                                    | H | 10.065949 | 15.083788 | 3.608071  |
|                                                                                                                    | B | 7.668084  | 16.045665 | 4.051709  |
|                                                                                                                    | H | 7.969739  | 16.990772 | 4.730575  |
|                                                                                                                    | B | 7.770634  | 14.378283 | 4.660682  |
|                                                                                                                    | H | 8.144738  | 14.128689 | 5.776008  |
|                                                                                                                    | N | 4.058082  | 13.604795 | 0.365022  |
|                                                                                                                    | H | 4.094143  | 14.616987 | -0.34987  |
|                                                                                                                    | H | 3.546542  | 12.871634 | -0.124756 |
|                                                                                                                    | H | 5.01973   | 13.287536 | 0.508659  |
|                                                                                                                    | N | 4.142868  | 15.757896 | -1.074685 |
|                                                                                                                    | H | 4.868188  | 15.691406 | -1.785622 |
|                                                                                                                    | H | 4.374188  | 16.549342 | -0.477528 |
|                                                                                                                    | H | 3.263128  | 15.963794 | -1.542323 |
|                                                                                                                    |   |           |           |           |
| [B <sub>12</sub> H <sub>11</sub> NCCH <sub>3</sub> NH <sub>2</sub> *NH <sub>4</sub> ] <sup>-</sup><br><b>Comp1</b> | N | 4.065555  | 14.156403 | 2.478202  |
|                                                                                                                    | C | 3.435946  | 13.709326 | 1.472161  |
|                                                                                                                    | C | 1.943328  | 13.486972 | 1.492503  |
|                                                                                                                    | H | 1.453346  | 14.014588 | 0.665574  |
|                                                                                                                    | H | 1.532348  | 13.841264 | 2.43865   |
|                                                                                                                    | H | 1.712614  | 12.421027 | 1.381673  |
|                                                                                                                    | B | 6.770251  | 14.729285 | 1.338719  |
|                                                                                                                    | H | 6.496581  | 14.766584 | 0.168271  |
|                                                                                                                    | B | 5.544999  | 14.39074  | 2.62133   |
|                                                                                                                    | B | 6.83232   | 13.201725 | 2.24212   |
|                                                                                                                    | H | 6.561482  | 12.148336 | 1.723259  |
|                                                                                                                    | B | 8.333922  | 14.082826 | 1.863833  |
|                                                                                                                    | H | 9.130346  | 13.659336 | 1.069081  |
|                                                                                                                    | B | 7.994378  | 15.825167 | 2.002107  |
|                                                                                                                    | H | 8.549851  | 16.634926 | 1.307141  |
|                                                                                                                    | B | 6.288637  | 16.010785 | 2.473898  |
|                                                                                                                    | H | 5.63356   | 16.970517 | 2.136421  |
|                                                                                                                    | B | 6.081975  | 15.285354 | 4.078593  |
|                                                                                                                    | H | 5.263573  | 15.704486 | 4.852475  |
|                                                                                                                    | B | 6.412696  | 13.548338 | 3.93715   |
|                                                                                                                    | H | 5.830998  | 12.74433  | 4.61645   |
|                                                                                                                    | B | 8.113839  | 13.348543 | 3.467605  |
|                                                                                                                    | H | 8.760758  | 12.397536 | 3.817608  |
|                                                                                                                    | B | 8.835747  | 14.972602 | 3.317834  |
|                                                                                                                    | H | 9.995649  | 15.179734 | 3.559172  |
|                                                                                                                    | B | 7.573199  | 16.169357 | 3.695765  |
|                                                                                                                    | H | 7.829912  | 17.228031 | 4.205008  |
|                                                                                                                    | B | 7.650688  | 14.641139 | 4.600944  |
|                                                                                                                    | H | 7.960989  | 14.607796 | 5.762434  |
|                                                                                                                    | N | 4.013047  | 13.463857 | 0.20338   |
|                                                                                                                    | H | 4.177918  | 15.247245 | -0.278562 |
|                                                                                                                    | H | 3.48357   | 12.831882 | -0.38614  |
|                                                                                                                    | H | 4.991741  | 13.195837 | 0.241588  |
|                                                                                                                    | N | 4.328037  | 16.285453 | -0.260428 |
|                                                                                                                    | H | 4.907949  | 16.562589 | -1.052018 |
|                                                                                                                    | H | 4.81414   | 16.535735 | 0.611793  |

|                                                                                                                     |   |          |           |           |
|---------------------------------------------------------------------------------------------------------------------|---|----------|-----------|-----------|
|                                                                                                                     | H | 3.436291 | 16.777016 | -0.307126 |
|                                                                                                                     |   |          |           |           |
| [B <sub>12</sub> H <sub>11</sub> NHCCH <sub>3</sub> NH <sub>2</sub> *NH <sub>3</sub> ] <sup>-</sup><br><b>Comp2</b> | N | 4.117205 | 14.433958 | 1.972136  |
|                                                                                                                     | C | 3.490674 | 13.612039 | 1.173145  |
|                                                                                                                     | C | 2.029826 | 13.797387 | 0.893151  |
|                                                                                                                     | H | 1.876412 | 13.956358 | -0.177816 |
|                                                                                                                     | H | 1.636522 | 14.655024 | 1.439492  |
|                                                                                                                     | H | 1.476114 | 12.901253 | 1.186746  |
|                                                                                                                     | B | 6.898437 | 14.676805 | 1.164855  |
|                                                                                                                     | H | 6.670416 | 14.607066 | -0.013746 |
|                                                                                                                     | B | 5.591273 | 14.522257 | 2.358791  |
|                                                                                                                     | B | 6.806814 | 13.233462 | 2.213567  |
|                                                                                                                     | H | 6.559298 | 12.13828  | 1.781349  |
|                                                                                                                     | B | 8.372618 | 14.006244 | 1.895693  |
|                                                                                                                     | H | 9.210153 | 13.462736 | 1.227069  |
|                                                                                                                     | B | 8.126283 | 15.767817 | 1.85182   |
|                                                                                                                     | H | 8.795925 | 16.481016 | 1.152686  |
|                                                                                                                     | B | 6.402808 | 16.086333 | 2.13672   |
|                                                                                                                     | H | 5.812841 | 17.011852 | 1.643881  |
|                                                                                                                     | B | 6.001668 | 15.510881 | 3.774849  |
|                                                                                                                     | H | 5.138847 | 16.035285 | 4.426346  |
|                                                                                                                     | B | 6.246442 | 13.747943 | 3.822249  |
|                                                                                                                     | H | 5.553213 | 13.037325 | 4.500752  |
|                                                                                                                     | B | 7.972737 | 13.43306  | 3.536216  |
|                                                                                                                     | H | 8.52931  | 12.485195 | 4.022192  |
|                                                                                                                     | B | 8.789894 | 14.998053 | 3.313174  |
|                                                                                                                     | H | 9.931181 | 15.167913 | 3.648845  |
|                                                                                                                     | B | 7.568942 | 16.283665 | 3.461396  |
|                                                                                                                     | H | 7.836067 | 17.367322 | 3.906888  |
|                                                                                                                     | B | 7.475419 | 14.840851 | 4.502546  |
|                                                                                                                     | H | 7.673815 | 14.904146 | 5.686397  |
|                                                                                                                     | N | 4.104477 | 12.595892 | 0.569808  |
|                                                                                                                     | H | 3.524837 | 15.198129 | 2.336197  |
|                                                                                                                     | H | 3.585004 | 11.970026 | -0.025445 |
|                                                                                                                     | H | 5.08138  | 12.397505 | 0.74863   |
|                                                                                                                     | N | 2.699859 | 16.78468  | 3.01286   |
|                                                                                                                     | H | 1.951609 | 17.293902 | 2.551752  |
|                                                                                                                     | H | 3.526786 | 17.376603 | 2.98999   |
|                                                                                                                     | H | 2.440078 | 16.684887 | 3.990214  |
|                                                                                                                     |   |          |           |           |
| [B <sub>12</sub> H <sub>11</sub> NHCCH <sub>3</sub> NH <sub>2</sub> ] <sup>-</sup><br><b>Prod</b>                   | N | 4.147089 | 14.035072 | 2.28479   |
|                                                                                                                     | H | 3.818573 | 14.431314 | 1.413254  |
|                                                                                                                     | N | 3.539137 | 12.644026 | 4.020229  |
|                                                                                                                     | H | 4.439592 | 12.742543 | 4.471369  |
|                                                                                                                     | C | 3.274433 | 13.251461 | 2.869995  |
|                                                                                                                     | C | 1.92785  | 13.019197 | 2.258246  |
|                                                                                                                     | H | 1.77084  | 11.949269 | 2.099285  |
|                                                                                                                     | H | 1.836406 | 13.537623 | 1.303843  |
|                                                                                                                     | H | 1.150411 | 13.38251  | 2.935492  |
|                                                                                                                     | B | 6.465922 | 15.494692 | 1.611807  |
|                                                                                                                     | H | 5.986673 | 15.826804 | 0.559902  |
|                                                                                                                     | B | 5.551597 | 14.460612 | 2.718458  |
|                                                                                                                     | B | 6.985406 | 13.81317  | 1.894327  |
|                                                                                                                     | H | 6.87843  | 12.973473 | 1.040994  |
|                                                                                                                     | B | 8.189238 | 15.117737 | 1.821239  |

|   |          |           |          |
|---|----------|-----------|----------|
| H | 8.969692 | 15.200336 | 0.910954 |
| B | 7.490254 | 16.562955 | 2.595269 |
| H | 7.773258 | 17.673658 | 2.23427  |
| B | 5.853091 | 16.155541 | 3.14948  |
| H | 4.952549 | 16.951773 | 3.170045 |
| B | 5.98717  | 14.881419 | 4.386637 |
| H | 5.192117 | 14.794338 | 5.284712 |
| B | 6.689806 | 13.431359 | 3.608623 |
| H | 6.40134  | 12.318698 | 3.962817 |
| B | 8.326477 | 13.845113 | 3.057574 |
| H | 9.201101 | 13.021023 | 3.029687 |
| B | 8.64028  | 15.540655 | 3.490566 |
| H | 9.744502 | 15.923582 | 3.769129 |
| B | 7.196654 | 16.181354 | 4.308965 |
| H | 7.266682 | 17.019304 | 5.167853 |
| B | 7.709809 | 14.500164 | 4.595304 |
| H | 8.147911 | 14.143331 | 5.655863 |
| H | 2.851079 | 12.044302 | 4.448127 |
