# Supplementary material for: Primary Amine Nucleophilic Addition to Nitrilium Closo-Dodecaborate [B12H11NCCH3]−: A Simple and Effective Route to the New BNCT Drug Design
Source: Int J Mol Sci. 2021 Dec 13;22(24):13391. doi: 10.3390/ijms222413391 (PMC8707455; doi:10.3390/ijms222413391)
Supplement: Supplementary file 1 [file ijms-22-13391-s001.zip]

Archive with 9 entries (9 files):
- CCDC 2122676.cif
- CCDC 2122677.cif
- CCDC 2122678.cif
- CCDC 2122679.cif
- checkcif_CCDC 2122676.pdf
- checkcif_CCDC 2122677.pdf
- checkcif_CCDC 2122678.pdf
- checkcif_CCDC 2122679.pdf
- nelyubin_supplementary_v2.pdf
