# Supplementary material for: Primary Amine Nucleophilic Addition to Nitrilium Closo-Dodecaborate [B12H11NCCH3]−: A Simple and Effective Route to the New BNCT Drug Design
Source: Int J Mol Sci. 2021 Dec 13;22(24):13391. doi: 10.3390/ijms222413391 (PMC8707455; doi:10.3390/ijms222413391)
Supplement: Supplementary file 1 [file ijms-22-13391-s001.zip › CCDC 2122676.cif]

 
data_Zh202
 
_audit_creation_method            'SHELXL-2018/3'
_shelx_SHELXL_version_number      '2018/3'
_chemical_name_systematic         ?
_chemical_name_common             ?
_chemical_melting_point           ?
_chemical_formula_moiety          ?
_chemical_formula_sum
 'C18 H53 B12 N3' 
_chemical_formula_weight          441.35

loop_
 _atom_type_symbol
 _atom_type_description
 _atom_type_scat_dispersion_real
 _atom_type_scat_dispersion_imag
 _atom_type_scat_source
 'C'  'C'   0.0033   0.0016
 'International Tables Vol C Tables 4.2.6.8 and 6.1.1.4'
 'H'  'H'   0.0000   0.0000
 'International Tables Vol C Tables 4.2.6.8 and 6.1.1.4'
 'B'  'B'   0.0013   0.0007
 'International Tables Vol C Tables 4.2.6.8 and 6.1.1.4'
 'N'  'N'   0.0061   0.0033
 'International Tables Vol C Tables 4.2.6.8 and 6.1.1.4'
 
_space_group_crystal_system       monoclinic
_space_group_IT_number            14
_space_group_name_H-M_alt         'P 21/n'
_space_group_name_Hall            '-P 2yn'
 
_shelx_space_group_comment
;
The symmetry employed for this shelxl refinement is uniquely defined
by the following loop, which should always be used as a source of
symmetry information in preference to the above space-group names.
They are only intended as comments.
;
 
loop_
 _space_group_symop_operation_xyz
 'x, y, z'
 '-x+1/2, y+1/2, -z+1/2'
 '-x, -y, -z'
 'x-1/2, -y-1/2, z-1/2'
 
_cell_length_a                    11.1175(5)
_cell_length_b                    12.6408(5)
_cell_length_c                    20.8691(10)
_cell_angle_alpha                 90
_cell_angle_beta                  92.663(2)
_cell_angle_gamma                 90
_cell_volume                      2929.7(2)
_cell_formula_units_Z             4
_cell_measurement_temperature     296(2)
_cell_measurement_reflns_used     4367
_cell_measurement_theta_min       3.07
_cell_measurement_theta_max       23.97
 
_exptl_crystal_description        'fragment'
_exptl_crystal_colour             'colourless'
_exptl_crystal_density_meas       ?
_exptl_crystal_density_method     ?
_exptl_crystal_density_diffrn     1.001          
_exptl_crystal_F_000              968
_exptl_transmission_factor_min    ?
_exptl_transmission_factor_max    ?
_exptl_crystal_size_max           0.360
_exptl_crystal_size_mid           0.220
_exptl_crystal_size_min           0.200
_exptl_absorpt_coefficient_mu     0.052
_shelx_estimated_absorpt_T_min    0.982
_shelx_estimated_absorpt_T_max    0.990
_exptl_absorpt_correction_type    none
_exptl_absorpt_correction_T_min   ?
_exptl_absorpt_correction_T_max   ?
_exptl_absorpt_process_details    ?
_exptl_absorpt_special_details    ?
_diffrn_ambient_temperature       296(2)
_diffrn_radiation_wavelength      0.71073
_diffrn_radiation_type            MoK\a
_diffrn_source                    ?
_diffrn_measurement_device_type    
 'Bruker KAPPA APEX II area-detector diffractometer' 
_diffrn_measurement_method        ?
_diffrn_detector_area_resol_mean  ?
_diffrn_reflns_number             26950
_diffrn_reflns_av_unetI/netI      0.0437
_diffrn_reflns_av_R_equivalents   0.0404
_diffrn_reflns_limit_h_min        -14
_diffrn_reflns_limit_h_max        14
_diffrn_reflns_limit_k_min        -16
_diffrn_reflns_limit_k_max        15
_diffrn_reflns_limit_l_min        -27
_diffrn_reflns_limit_l_max        27
_diffrn_reflns_theta_min          4.077
_diffrn_reflns_theta_max          27.499
_diffrn_reflns_theta_full         25.242
_diffrn_measured_fraction_theta_max   0.994
_diffrn_measured_fraction_theta_full  0.994
_diffrn_reflns_Laue_measured_fraction_max    0.994
_diffrn_reflns_Laue_measured_fraction_full   0.994
_diffrn_reflns_point_group_measured_fraction_max   0.994
_diffrn_reflns_point_group_measured_fraction_full  0.994
_reflns_number_total              6697
_reflns_number_gt                 4159
_reflns_threshold_expression      'I > 2\s(I)'
_reflns_Friedel_coverage          0.000
_reflns_Friedel_fraction_max      .
_reflns_Friedel_fraction_full     .
 
_reflns_special_details
;
 Reflections were merged by SHELXL according to the crystal
 class for the calculation of statistics and refinement.
 
 _reflns_Friedel_fraction is defined as the number of unique
 Friedel pairs measured divided by the number that would be
 possible theoretically, ignoring centric projections and
 systematic absences.
;
 
_computing_data_collection        ?
_computing_cell_refinement        ?
_computing_data_reduction         ?
_computing_structure_solution     ?
_computing_structure_refinement 'SHELXL-2018/3 (Sheldrick, 2018)'
_computing_molecular_graphics     ?
_computing_publication_material   ?
_refine_special_details           ?
_refine_ls_structure_factor_coef  Fsqd
_refine_ls_matrix_type            full
_refine_ls_weighting_scheme       calc
_refine_ls_weighting_details
'w=1/[\s^2^(Fo^2^)+(0.0928P)^2^+0.5369P] where P=(Fo^2^+2Fc^2^)/3'
_atom_sites_solution_primary      ?
_atom_sites_solution_secondary    ?
_atom_sites_solution_hydrogens    mixed
_refine_ls_hydrogen_treatment     mixed
_refine_ls_extinction_method      none
_refine_ls_extinction_coef        .
_refine_ls_number_reflns          6697
_refine_ls_number_parameters      332
_refine_ls_number_restraints      0
_refine_ls_R_factor_all           0.1058
_refine_ls_R_factor_gt            0.0619
_refine_ls_wR_factor_ref          0.1897
_refine_ls_wR_factor_gt           0.1607
_refine_ls_goodness_of_fit_ref    1.015
_refine_ls_restrained_S_all       1.015
_refine_ls_shift/su_max           0.000
_refine_ls_shift/su_mean          0.000
 
loop_
 _atom_site_label
 _atom_site_type_symbol
 _atom_site_fract_x
 _atom_site_fract_y
 _atom_site_fract_z
 _atom_site_U_iso_or_equiv
 _atom_site_adp_type
 _atom_site_occupancy
 _atom_site_site_symmetry_order  
 _atom_site_calc_flag
 _atom_site_refinement_flags_posn
 _atom_site_refinement_flags_adp
 _atom_site_refinement_flags_occupancy
 _atom_site_disorder_assembly
 _atom_site_disorder_group
N1 N 0.19767(14) 0.48688(12) 0.55121(7) 0.0469(4) Uani 1 1 d . . . . .
H1A H 0.123690 0.498614 0.559260 0.056 Uiso 1 1 calc R U . . .
N2 N 0.39025(17) 0.53566(17) 0.57641(11) 0.0864(7) Uani 1 1 d . . . . .
H2A H 0.416022 0.492692 0.548190 0.104 Uiso 1 1 calc R U . . .
H2B H 0.440424 0.573565 0.599057 0.104 Uiso 1 1 calc R U . . .
N3 N 0.77281(13) 0.19132(10) 0.62422(7) 0.0396(3) Uani 1 1 d . . . . .
C1 C 0.27513(17) 0.54334(14) 0.58486(9) 0.0469(4) Uani 1 1 d . . . . .
C3 C 0.2366(2) 0.61678(17) 0.63521(11) 0.0665(6) Uani 1 1 d . . . . .
H3A H 0.298516 0.668427 0.643978 0.100 Uiso 1 1 calc R U . . .
H3B H 0.222612 0.577719 0.673604 0.100 Uiso 1 1 calc R U . . .
H3C H 0.163732 0.651831 0.620708 0.100 Uiso 1 1 calc R U . . .
C11 C 0.85660(17) 0.09716(14) 0.63506(9) 0.0477(4) Uani 1 1 d . . . . .
H11A H 0.878043 0.092340 0.680559 0.057 Uiso 1 1 calc R U . . .
H11B H 0.812787 0.033307 0.622977 0.057 Uiso 1 1 calc R U . . .
C12 C 0.97163(19) 0.10010(18) 0.59879(12) 0.0635(6) Uani 1 1 d . . . . .
H12A H 0.952824 0.085759 0.553776 0.076 Uiso 1 1 calc R U . . .
H12B H 1.006498 0.170333 0.602131 0.076 Uiso 1 1 calc R U . . .
C13 C 1.0623(2) 0.0201(2) 0.62455(15) 0.0814(8) Uani 1 1 d . . . . .
H13A H 1.021796 -0.047047 0.630204 0.098 Uiso 1 1 calc R U . . .
H13B H 1.122892 0.009674 0.593188 0.098 Uiso 1 1 calc R U . . .
C14 C 1.1231(3) 0.0520(3) 0.68692(17) 0.1110(11) Uani 1 1 d . . . . .
H14A H 1.179405 -0.001875 0.700758 0.166 Uiso 1 1 calc R U . . .
H14B H 1.165056 0.117493 0.681513 0.166 Uiso 1 1 calc R U . . .
H14C H 1.063901 0.060739 0.718550 0.166 Uiso 1 1 calc R U . . .
C21 C 0.74318(17) 0.20780(14) 0.55312(8) 0.0443(4) Uani 1 1 d . . . . .
H21A H 0.691539 0.269387 0.548118 0.053 Uiso 1 1 calc R U . . .
H21B H 0.817329 0.223382 0.532276 0.053 Uiso 1 1 calc R U . . .
C22 C 0.68221(19) 0.11603(16) 0.51876(9) 0.0521(5) Uani 1 1 d . . . . .
H22A H 0.602969 0.105378 0.535251 0.063 Uiso 1 1 calc R U . . .
H22B H 0.728840 0.052144 0.526780 0.063 Uiso 1 1 calc R U . . .
C23 C 0.6703(2) 0.13639(18) 0.44737(9) 0.0584(5) Uani 1 1 d . . . . .
H23A H 0.749594 0.148849 0.431418 0.070 Uiso 1 1 calc R U . . .
H23B H 0.622742 0.199874 0.439680 0.070 Uiso 1 1 calc R U . . .
C24 C 0.6115(2) 0.0453(2) 0.41049(11) 0.0735(7) Uani 1 1 d . . . . .
H24A H 0.606105 0.062134 0.365590 0.110 Uiso 1 1 calc R U . . .
H24B H 0.659097 -0.017473 0.417127 0.110 Uiso 1 1 calc R U . . .
H24C H 0.532236 0.033556 0.425390 0.110 Uiso 1 1 calc R U . . .
C31 C 0.83200(17) 0.29260(14) 0.64910(9) 0.0468(4) Uani 1 1 d . . . . .
H31A H 0.905962 0.303018 0.627024 0.056 Uiso 1 1 calc R U . . .
H31B H 0.779069 0.351421 0.637903 0.056 Uiso 1 1 calc R U . . .
C32 C 0.8614(2) 0.29622(19) 0.72049(10) 0.0672(6) Uani 1 1 d . . . . .
H32A H 0.909280 0.234797 0.732899 0.081 Uiso 1 1 calc R U . . .
H32B H 0.787192 0.293262 0.743142 0.081 Uiso 1 1 calc R U . . .
C33 C 0.9298(2) 0.39559(18) 0.73987(12) 0.0693(6) Uani 1 1 d . . . . .
H33A H 0.889419 0.456114 0.720035 0.083 Uiso 1 1 calc R U . . .
H33B H 0.927854 0.404150 0.786000 0.083 Uiso 1 1 calc R U . . .
C34 C 1.0571(3) 0.3947(3) 0.72145(15) 0.1119(11) Uani 1 1 d . . . . .
H34A H 1.095428 0.459488 0.734978 0.168 Uiso 1 1 calc R U . . .
H34B H 1.098281 0.335987 0.741725 0.168 Uiso 1 1 calc R U . . .
H34C H 1.059822 0.387984 0.675718 0.168 Uiso 1 1 calc R U . . .
C41 C 0.66051(17) 0.16619(17) 0.65981(9) 0.0528(5) Uani 1 1 d . . . . .
H41A H 0.625265 0.101886 0.641860 0.063 Uiso 1 1 calc R U . . .
H41B H 0.684335 0.151727 0.704252 0.063 Uiso 1 1 calc R U . . .
C42 C 0.5650(2) 0.2504(2) 0.65840(13) 0.0771(7) Uani 1 1 d . . . . .
H42A H 0.532142 0.260066 0.614916 0.093 Uiso 1 1 calc R U . . .
H42B H 0.599245 0.317071 0.673283 0.093 Uiso 1 1 calc R U . . .
C43 C 0.4640(2) 0.2153(3) 0.70268(16) 0.0991(10) Uani 1 1 d . . . . .
H43A H 0.424128 0.153504 0.684109 0.119 Uiso 1 1 calc R U . . .
H43B H 0.500401 0.194764 0.743970 0.119 Uiso 1 1 calc R U . . .
C44 C 0.3753(3) 0.2956(3) 0.7125(2) 0.1361(15) Uani 1 1 d . . . . .
H44A H 0.315854 0.268846 0.740233 0.204 Uiso 1 1 calc R U . . .
H44B H 0.413645 0.356521 0.731950 0.204 Uiso 1 1 calc R U . . .
H44C H 0.337304 0.315223 0.672036 0.204 Uiso 1 1 calc R U . . .
B1 B 0.21583(18) 0.40306(15) 0.49969(10) 0.0399(4) Uani 1 1 d . . . . .
B2 B 0.35225(18) 0.33471(16) 0.48620(10) 0.0432(5) Uani 1 1 d . . . . .
H2 H 0.4390(17) 0.3514(14) 0.5146(9) 0.052 Uiso 1 1 d . U . . .
B3 B 0.2303(2) 0.26649(17) 0.52003(11) 0.0476(5) Uani 1 1 d . . . . .
H3 H 0.2334(17) 0.2434(15) 0.5701(10) 0.057 Uiso 1 1 d . U . . .
B4 B 0.09398(19) 0.31563(17) 0.48214(11) 0.0453(5) Uani 1 1 d . . . . .
H4 H 0.0100(17) 0.3247(14) 0.5070(9) 0.054 Uiso 1 1 d . U . . .
B5 B 0.13220(19) 0.41411(17) 0.42536(10) 0.0437(5) Uani 1 1 d . . . . .
H5 H 0.0713(18) 0.4820(15) 0.4163(9) 0.052 Uiso 1 1 d . U . . .
B6 B 0.29261(18) 0.42643(16) 0.42806(10) 0.0408(4) Uani 1 1 d . . . . .
H6 H 0.3404(17) 0.5048(14) 0.4197(9) 0.049 Uiso 1 1 d . U . . .
B7 B 0.35197(19) 0.30317(16) 0.40322(10) 0.0438(5) Uani 1 1 d . . . . .
H7 H 0.4370(17) 0.2963(14) 0.3758(9) 0.053 Uiso 1 1 d . U . . .
B8 B 0.3140(2) 0.20487(17) 0.46016(11) 0.0488(5) Uani 1 1 d . . . . .
H8 H 0.3761(18) 0.1371(16) 0.4703(9) 0.059 Uiso 1 1 d . U . . .
B9 B 0.1555(2) 0.19316(17) 0.45804(11) 0.0490(5) Uani 1 1 d . . . . .
H9 H 0.1125(18) 0.1159(16) 0.4672(9) 0.059 Uiso 1 1 d . U . . .
B10 B 0.0951(2) 0.28355(18) 0.39970(11) 0.0496(5) Uani 1 1 d . . . . .
H10 H 0.0075(18) 0.2660(16) 0.3710(10) 0.060 Uiso 1 1 d . U . . .
B11 B 0.2167(2) 0.35202(17) 0.36579(10) 0.0458(5) Uani 1 1 d . . . . .
H11 H 0.2129(17) 0.3816(14) 0.3154(10) 0.055 Uiso 1 1 d . U . . .
B12 B 0.2302(2) 0.21522(17) 0.38574(11) 0.0474(5) Uani 1 1 d . . . . .
H12 H 0.2400(17) 0.1517(15) 0.3494(9) 0.057 Uiso 1 1 d . U . . .
 
loop_
 _atom_site_aniso_label
 _atom_site_aniso_U_11
 _atom_site_aniso_U_22
 _atom_site_aniso_U_33
 _atom_site_aniso_U_23
 _atom_site_aniso_U_13
 _atom_site_aniso_U_12
N1 0.0371(8) 0.0539(9) 0.0504(9) -0.0080(7) 0.0083(7) -0.0012(7)
N2 0.0489(11) 0.1005(16) 0.1111(17) -0.0554(14) 0.0159(11) -0.0224(11)
N3 0.0413(8) 0.0395(7) 0.0380(8) 0.0061(6) 0.0020(6) -0.0038(6)
C1 0.0470(11) 0.0449(10) 0.0493(11) -0.0022(8) 0.0084(8) -0.0066(8)
C3 0.0742(15) 0.0607(13) 0.0655(14) -0.0183(11) 0.0130(12) -0.0096(11)
C11 0.0515(11) 0.0411(9) 0.0499(11) 0.0082(8) -0.0055(9) -0.0003(8)
C12 0.0524(12) 0.0632(13) 0.0751(15) 0.0026(11) 0.0062(11) 0.0091(10)
C13 0.0583(14) 0.0680(15) 0.117(2) -0.0100(14) -0.0104(14) 0.0136(12)
C14 0.080(2) 0.122(3) 0.127(3) 0.006(2) -0.0360(19) 0.0163(18)
C21 0.0498(10) 0.0447(10) 0.0383(9) 0.0074(7) 0.0003(8) 0.0006(8)
C22 0.0555(12) 0.0553(11) 0.0449(11) 0.0035(8) -0.0049(9) -0.0058(9)
C23 0.0605(13) 0.0690(13) 0.0453(11) 0.0059(9) -0.0013(9) 0.0081(10)
C24 0.0738(16) 0.0941(18) 0.0516(13) -0.0138(12) -0.0094(11) 0.0040(13)
C31 0.0504(11) 0.0423(9) 0.0475(10) 0.0013(8) 0.0012(8) -0.0057(8)
C32 0.0813(16) 0.0742(14) 0.0463(12) -0.0071(10) 0.0062(11) -0.0243(12)
C33 0.0761(16) 0.0624(13) 0.0682(14) -0.0121(11) -0.0083(12) -0.0050(12)
C34 0.093(2) 0.157(3) 0.085(2) -0.016(2) -0.0011(17) -0.055(2)
C41 0.0454(11) 0.0694(13) 0.0438(10) 0.0051(9) 0.0058(8) -0.0114(9)
C42 0.0518(13) 0.0980(19) 0.0828(17) -0.0076(14) 0.0168(12) 0.0031(13)
C43 0.0658(17) 0.139(3) 0.093(2) -0.0132(19) 0.0197(15) 0.0103(17)
C44 0.086(2) 0.187(4) 0.138(3) -0.041(3) 0.034(2) 0.014(2)
B1 0.0365(10) 0.0403(10) 0.0430(11) -0.0014(8) 0.0041(8) -0.0008(8)
B2 0.0358(11) 0.0450(11) 0.0485(12) 0.0015(9) -0.0005(9) 0.0051(9)
B3 0.0544(13) 0.0453(11) 0.0433(12) 0.0062(9) 0.0054(10) -0.0012(10)
B4 0.0375(11) 0.0484(11) 0.0508(12) -0.0036(9) 0.0100(9) -0.0055(9)
B5 0.0365(10) 0.0462(11) 0.0482(12) 0.0023(9) 0.0001(9) 0.0050(9)
B6 0.0373(10) 0.0411(10) 0.0444(11) 0.0033(8) 0.0055(8) -0.0010(8)
B7 0.0397(11) 0.0429(10) 0.0496(12) -0.0020(9) 0.0093(9) 0.0012(9)
B8 0.0498(12) 0.0407(11) 0.0560(13) 0.0027(9) 0.0045(10) 0.0050(9)
B9 0.0502(13) 0.0424(11) 0.0552(13) -0.0024(9) 0.0106(10) -0.0075(9)
B10 0.0419(12) 0.0556(13) 0.0509(13) -0.0061(10) -0.0020(10) -0.0033(10)
B11 0.0495(12) 0.0500(11) 0.0378(11) 0.0032(9) 0.0019(9) 0.0007(9)
B12 0.0502(12) 0.0455(11) 0.0471(12) -0.0063(9) 0.0082(10) -0.0033(9)
 
_geom_special_details
;
 All esds (except the esd in the dihedral angle between two l.s. planes)
 are estimated using the full covariance matrix.  The cell esds are taken
 into account individually in the estimation of esds in distances, angles
 and torsion angles; correlations between esds in cell parameters are only
 used when they are defined by crystal symmetry.  An approximate (isotropic)
 treatment of cell esds is used for estimating esds involving l.s. planes.
;
 
loop_
 _geom_bond_atom_site_label_1
 _geom_bond_atom_site_label_2
 _geom_bond_distance
 _geom_bond_site_symmetry_2
 _geom_bond_publ_flag
N1 C1 1.299(2) . ?
N1 B1 1.529(2) . ?
N1 H1A 0.8600 . ?
N2 C1 1.304(3) . ?
N2 H2A 0.8600 . ?
N2 H2B 0.8600 . ?
N3 C41 1.516(2) . ?
N3 C21 1.519(2) . ?
N3 C31 1.520(2) . ?
N3 C11 1.522(2) . ?
C1 C3 1.480(3) . ?
C3 H3A 0.9600 . ?
C3 H3B 0.9600 . ?
C3 H3C 0.9600 . ?
C11 C12 1.516(3) . ?
C11 H11A 0.9700 . ?
C11 H11B 0.9700 . ?
C12 C13 1.509(3) . ?
C12 H12A 0.9700 . ?
C12 H12B 0.9700 . ?
C13 C14 1.494(4) . ?
C13 H13A 0.9700 . ?
C13 H13B 0.9700 . ?
C14 H14A 0.9600 . ?
C14 H14B 0.9600 . ?
C14 H14C 0.9600 . ?
C21 C22 1.508(3) . ?
C21 H21A 0.9700 . ?
C21 H21B 0.9700 . ?
C22 C23 1.512(3) . ?
C22 H22A 0.9700 . ?
C22 H22B 0.9700 . ?
C23 C24 1.516(3) . ?
C23 H23A 0.9700 . ?
C23 H23B 0.9700 . ?
C24 H24A 0.9600 . ?
C24 H24B 0.9600 . ?
C24 H24C 0.9600 . ?
C31 C32 1.511(3) . ?
C31 H31A 0.9700 . ?
C31 H31B 0.9700 . ?
C32 C33 1.514(3) . ?
C32 H32A 0.9700 . ?
C32 H32B 0.9700 . ?
C33 C34 1.483(4) . ?
C33 H33A 0.9700 . ?
C33 H33B 0.9700 . ?
C34 H34A 0.9600 . ?
C34 H34B 0.9600 . ?
C34 H34C 0.9600 . ?
C41 C42 1.503(3) . ?
C41 H41A 0.9700 . ?
C41 H41B 0.9700 . ?
C42 C43 1.551(4) . ?
C42 H42A 0.9700 . ?
C42 H42B 0.9700 . ?
C43 C44 1.437(4) . ?
C43 H43A 0.9700 . ?
C43 H43B 0.9700 . ?
C44 H44A 0.9600 . ?
C44 H44B 0.9600 . ?
C44 H44C 0.9600 . ?
B1 B4 1.773(3) . ?
B1 B5 1.777(3) . ?
B1 B2 1.779(3) . ?
B1 B6 1.780(3) . ?
B1 B3 1.783(3) . ?
B2 B8 1.774(3) . ?
B2 B7 1.777(3) . ?
B2 B3 1.781(3) . ?
B2 B6 1.784(3) . ?
B2 H2 1.129(19) . ?
B3 B9 1.768(3) . ?
B3 B8 1.773(3) . ?
B3 B4 1.788(3) . ?
B3 H3 1.08(2) . ?
B4 B10 1.768(3) . ?
B4 B9 1.774(3) . ?
B4 B5 1.784(3) . ?
B4 H4 1.095(19) . ?
B5 B11 1.776(3) . ?
B5 B10 1.778(3) . ?
B5 B6 1.788(3) . ?
B5 H5 1.104(19) . ?
B6 B7 1.779(3) . ?
B6 B11 1.784(3) . ?
B6 H6 1.141(18) . ?
B7 B11 1.773(3) . ?
B7 B12 1.776(3) . ?
B7 B8 1.783(3) . ?
B7 H7 1.13(2) . ?
B8 B9 1.767(3) . ?
B8 B12 1.778(3) . ?
B8 H8 1.11(2) . ?
B9 B12 1.778(3) . ?
B9 B10 1.778(3) . ?
B9 H9 1.11(2) . ?
B10 B12 1.769(3) . ?
B10 B11 1.779(3) . ?
B10 H10 1.14(2) . ?
B11 B12 1.783(3) . ?
B11 H11 1.115(19) . ?
B12 H12 1.11(2) . ?
 
loop_
 _geom_angle_atom_site_label_1
 _geom_angle_atom_site_label_2
 _geom_angle_atom_site_label_3
 _geom_angle
 _geom_angle_site_symmetry_1
 _geom_angle_site_symmetry_3
 _geom_angle_publ_flag
C1 N1 B1 130.89(16) . . ?
C1 N1 H1A 114.6 . . ?
B1 N1 H1A 114.6 . . ?
C1 N2 H2A 120.0 . . ?
C1 N2 H2B 120.0 . . ?
H2A N2 H2B 120.0 . . ?
C41 N3 C21 111.17(14) . . ?
C41 N3 C31 111.25(14) . . ?
C21 N3 C31 106.80(13) . . ?
C41 N3 C11 106.00(13) . . ?
C21 N3 C11 110.85(14) . . ?
C31 N3 C11 110.84(13) . . ?
N1 C1 N2 121.08(18) . . ?
N1 C1 C3 121.46(18) . . ?
N2 C1 C3 117.44(18) . . ?
C1 C3 H3A 109.5 . . ?
C1 C3 H3B 109.5 . . ?
H3A C3 H3B 109.5 . . ?
C1 C3 H3C 109.5 . . ?
H3A C3 H3C 109.5 . . ?
H3B C3 H3C 109.5 . . ?
C12 C11 N3 115.54(15) . . ?
C12 C11 H11A 108.4 . . ?
N3 C11 H11A 108.4 . . ?
C12 C11 H11B 108.4 . . ?
N3 C11 H11B 108.4 . . ?
H11A C11 H11B 107.5 . . ?
C13 C12 C11 111.7(2) . . ?
C13 C12 H12A 109.3 . . ?
C11 C12 H12A 109.3 . . ?
C13 C12 H12B 109.3 . . ?
C11 C12 H12B 109.3 . . ?
H12A C12 H12B 107.9 . . ?
C14 C13 C12 113.4(2) . . ?
C14 C13 H13A 108.9 . . ?
C12 C13 H13A 108.9 . . ?
C14 C13 H13B 108.9 . . ?
C12 C13 H13B 108.9 . . ?
H13A C13 H13B 107.7 . . ?
C13 C14 H14A 109.5 . . ?
C13 C14 H14B 109.5 . . ?
H14A C14 H14B 109.5 . . ?
C13 C14 H14C 109.5 . . ?
H14A C14 H14C 109.5 . . ?
H14B C14 H14C 109.5 . . ?
C22 C21 N3 115.54(14) . . ?
C22 C21 H21A 108.4 . . ?
N3 C21 H21A 108.4 . . ?
C22 C21 H21B 108.4 . . ?
N3 C21 H21B 108.4 . . ?
H21A C21 H21B 107.5 . . ?
C21 C22 C23 110.77(16) . . ?
C21 C22 H22A 109.5 . . ?
C23 C22 H22A 109.5 . . ?
C21 C22 H22B 109.5 . . ?
C23 C22 H22B 109.5 . . ?
H22A C22 H22B 108.1 . . ?
C22 C23 C24 112.78(18) . . ?
C22 C23 H23A 109.0 . . ?
C24 C23 H23A 109.0 . . ?
C22 C23 H23B 109.0 . . ?
C24 C23 H23B 109.0 . . ?
H23A C23 H23B 107.8 . . ?
C23 C24 H24A 109.5 . . ?
C23 C24 H24B 109.5 . . ?
H24A C24 H24B 109.5 . . ?
C23 C24 H24C 109.5 . . ?
H24A C24 H24C 109.5 . . ?
H24B C24 H24C 109.5 . . ?
C32 C31 N3 115.63(15) . . ?
C32 C31 H31A 108.4 . . ?
N3 C31 H31A 108.4 . . ?
C32 C31 H31B 108.4 . . ?
N3 C31 H31B 108.4 . . ?
H31A C31 H31B 107.4 . . ?
C31 C32 C33 111.80(18) . . ?
C31 C32 H32A 109.3 . . ?
C33 C32 H32A 109.3 . . ?
C31 C32 H32B 109.3 . . ?
C33 C32 H32B 109.3 . . ?
H32A C32 H32B 107.9 . . ?
C34 C33 C32 113.5(2) . . ?
C34 C33 H33A 108.9 . . ?
C32 C33 H33A 108.9 . . ?
C34 C33 H33B 108.9 . . ?
C32 C33 H33B 108.9 . . ?
H33A C33 H33B 107.7 . . ?
C33 C34 H34A 109.5 . . ?
C33 C34 H34B 109.5 . . ?
H34A C34 H34B 109.5 . . ?
C33 C34 H34C 109.5 . . ?
H34A C34 H34C 109.5 . . ?
H34B C34 H34C 109.5 . . ?
C42 C41 N3 116.06(17) . . ?
C42 C41 H41A 108.3 . . ?
N3 C41 H41A 108.3 . . ?
C42 C41 H41B 108.3 . . ?
N3 C41 H41B 108.3 . . ?
H41A C41 H41B 107.4 . . ?
C41 C42 C43 108.4(2) . . ?
C41 C42 H42A 110.0 . . ?
C43 C42 H42A 110.0 . . ?
C41 C42 H42B 110.0 . . ?
C43 C42 H42B 110.0 . . ?
H42A C42 H42B 108.4 . . ?
C44 C43 C42 113.8(3) . . ?
C44 C43 H43A 108.8 . . ?
C42 C43 H43A 108.8 . . ?
C44 C43 H43B 108.8 . . ?
C42 C43 H43B 108.8 . . ?
H43A C43 H43B 107.7 . . ?
C43 C44 H44A 109.5 . . ?
C43 C44 H44B 109.5 . . ?
H44A C44 H44B 109.5 . . ?
C43 C44 H44C 109.5 . . ?
H44A C44 H44C 109.5 . . ?
H44B C44 H44C 109.5 . . ?
N1 B1 B4 116.90(15) . . ?
N1 B1 B5 118.59(15) . . ?
B4 B1 B5 60.32(12) . . ?
N1 B1 B2 126.08(16) . . ?
B4 B1 B2 108.25(14) . . ?
B5 B1 B2 108.38(14) . . ?
N1 B1 B6 124.02(15) . . ?
B4 B1 B6 108.75(14) . . ?
B5 B1 B6 60.37(12) . . ?
B2 B1 B6 60.14(11) . . ?
N1 B1 B3 121.11(15) . . ?
B4 B1 B3 60.34(12) . . ?
B5 B1 B3 108.76(14) . . ?
B2 B1 B3 59.97(12) . . ?
B6 B1 B3 108.61(14) . . ?
B8 B2 B7 60.29(12) . . ?
B8 B2 B1 107.68(15) . . ?
B7 B2 B1 107.47(14) . . ?
B8 B2 B3 59.82(12) . . ?
B7 B2 B3 108.11(15) . . ?
B1 B2 B3 60.13(12) . . ?
B8 B2 B6 108.46(15) . . ?
B7 B2 B6 59.94(12) . . ?
B1 B2 B6 59.95(11) . . ?
B3 B2 B6 108.58(14) . . ?
B8 B2 H2 121.4(9) . . ?
B7 B2 H2 121.1(10) . . ?
B1 B2 H2 122.7(10) . . ?
B3 B2 H2 122.0(10) . . ?
B6 B2 H2 121.2(10) . . ?
B9 B3 B8 59.89(13) . . ?
B9 B3 B2 107.75(15) . . ?
B8 B3 B2 59.91(12) . . ?
B9 B3 B1 107.42(15) . . ?
B8 B3 B1 107.58(15) . . ?
B2 B3 B1 59.90(11) . . ?
B9 B3 B4 59.88(13) . . ?
B8 B3 B4 107.64(16) . . ?
B2 B3 B4 107.57(14) . . ?
B1 B3 B4 59.55(11) . . ?
B9 B3 H3 123.9(10) . . ?
B8 B3 H3 124.5(10) . . ?
B2 B3 H3 121.4(11) . . ?
B1 B3 H3 119.3(10) . . ?
B4 B3 H3 120.6(11) . . ?
B10 B4 B1 107.70(15) . . ?
B10 B4 B9 60.26(13) . . ?
B1 B4 B9 107.56(15) . . ?
B10 B4 B5 60.06(12) . . ?
B1 B4 B5 59.93(12) . . ?
B9 B4 B5 108.29(15) . . ?
B10 B4 B3 107.85(15) . . ?
B1 B4 B3 60.11(12) . . ?
B9 B4 B3 59.50(13) . . ?
B5 B4 B3 108.26(14) . . ?
B10 B4 H4 121.9(10) . . ?
B1 B4 H4 119.8(10) . . ?
B9 B4 H4 125.0(10) . . ?
B5 B4 H4 118.4(10) . . ?
B3 B4 H4 123.5(10) . . ?
B11 B5 B1 107.71(14) . . ?
B11 B5 B10 60.10(12) . . ?
B1 B5 B10 107.14(14) . . ?
B11 B5 B4 107.86(15) . . ?
B1 B5 B4 59.75(11) . . ?
B10 B5 B4 59.54(12) . . ?
B11 B5 B6 60.09(12) . . ?
B1 B5 B6 59.91(11) . . ?
B10 B5 B6 107.89(15) . . ?
B4 B5 B6 107.92(15) . . ?
B11 B5 H5 124.3(10) . . ?
B1 B5 H5 120.2(10) . . ?
B10 B5 H5 122.6(10) . . ?
B4 B5 H5 119.6(10) . . ?
B6 B5 H5 122.7(10) . . ?
B7 B6 B1 107.35(14) . . ?
B7 B6 B2 59.84(12) . . ?
B1 B6 B2 59.90(11) . . ?
B7 B6 B11 59.69(12) . . ?
B1 B6 B11 107.16(14) . . ?
B2 B6 B11 107.52(14) . . ?
B7 B6 B5 107.30(14) . . ?
B1 B6 B5 59.72(11) . . ?
B2 B6 B5 107.67(14) . . ?
B11 B6 B5 59.60(12) . . ?
B7 B6 H6 122.3(9) . . ?
B1 B6 H6 121.2(9) . . ?
B2 B6 H6 120.5(9) . . ?
B11 B6 H6 123.6(9) . . ?
B5 B6 H6 122.8(9) . . ?
B11 B7 B12 60.33(12) . . ?
B11 B7 B2 108.32(14) . . ?
B12 B7 B2 107.90(15) . . ?
B11 B7 B6 60.32(12) . . ?
B12 B7 B6 108.58(15) . . ?
B2 B7 B6 60.22(11) . . ?
B11 B7 B8 108.30(15) . . ?
B12 B7 B8 59.94(13) . . ?
B2 B7 B8 59.78(12) . . ?
B6 B7 B8 108.28(15) . . ?
B11 B7 H7 121.1(10) . . ?
B12 B7 H7 119.7(10) . . ?
B2 B7 H7 123.1(10) . . ?
B6 B7 H7 123.0(9) . . ?
B8 B7 H7 120.9(10) . . ?
B9 B8 B3 59.91(13) . . ?
B9 B8 B2 108.04(15) . . ?
B3 B8 B2 60.26(12) . . ?
B9 B8 B12 60.20(13) . . ?
B3 B8 B12 108.20(16) . . ?
B2 B8 B12 107.93(15) . . ?
B9 B8 B7 107.96(16) . . ?
B3 B8 B7 108.17(14) . . ?
B2 B8 B7 59.92(12) . . ?
B12 B8 B7 59.83(12) . . ?
B9 B8 H8 123.3(10) . . ?
B3 B8 H8 123.0(10) . . ?
B2 B8 H8 121.0(10) . . ?
B12 B8 H8 121.2(10) . . ?
B7 B8 H8 119.9(10) . . ?
B8 B9 B3 60.20(13) . . ?
B8 B9 B4 108.46(15) . . ?
B3 B9 B4 60.62(12) . . ?
B8 B9 B12 60.20(13) . . ?
B3 B9 B12 108.43(15) . . ?
B4 B9 B12 107.76(15) . . ?
B8 B9 B10 107.90(16) . . ?
B3 B9 B10 108.29(15) . . ?
B4 B9 B10 59.70(12) . . ?
B12 B9 B10 59.64(13) . . ?
B8 B9 H9 120.5(10) . . ?
B3 B9 H9 121.8(10) . . ?
B4 B9 H9 123.0(10) . . ?
B12 B9 H9 120.5(10) . . ?
B10 B9 H9 122.2(10) . . ?
B4 B10 B12 108.47(16) . . ?
B4 B10 B5 60.40(12) . . ?
B12 B10 B5 108.43(15) . . ?
B4 B10 B9 60.04(13) . . ?
B12 B10 B9 60.18(12) . . ?
B5 B10 B9 108.39(15) . . ?
B4 B10 B11 108.38(15) . . ?
B12 B10 B11 60.35(12) . . ?
B5 B10 B11 59.89(12) . . ?
B9 B10 B11 108.39(15) . . ?
B4 B10 H10 120.7(10) . . ?
B12 B10 H10 122.0(10) . . ?
B5 B10 H10 121.3(10) . . ?
B9 B10 H10 121.3(10) . . ?
B11 B10 H10 122.1(10) . . ?
B7 B11 B5 108.12(15) . . ?
B7 B11 B10 107.45(15) . . ?
B5 B11 B10 60.01(12) . . ?
B7 B11 B12 59.92(12) . . ?
B5 B11 B12 107.87(15) . . ?
B10 B11 B12 59.53(13) . . ?
B7 B11 B6 59.99(12) . . ?
B5 B11 B6 60.31(12) . . ?
B10 B11 B6 108.01(15) . . ?
B12 B11 B6 108.01(15) . . ?
B7 B11 H11 121.8(10) . . ?
B5 B11 H11 121.0(10) . . ?
B10 B11 H11 122.8(10) . . ?
B12 B11 H11 123.0(10) . . ?
B6 B11 H11 120.4(10) . . ?
B10 B12 B7 107.78(15) . . ?
B10 B12 B9 60.18(13) . . ?
B7 B12 B9 107.80(15) . . ?
B10 B12 B8 107.85(15) . . ?
B7 B12 B8 60.23(12) . . ?
B9 B12 B8 59.59(13) . . ?
B10 B12 B11 60.12(12) . . ?
B7 B12 B11 59.75(12) . . ?
B9 B12 B11 108.21(15) . . ?
B8 B12 B11 108.08(15) . . ?
B10 B12 H12 125.1(10) . . ?
B7 B12 H12 119.6(10) . . ?
B9 B12 H12 121.9(10) . . ?
B8 B12 H12 118.6(10) . . ?
B11 B12 H12 123.4(10) . . ?
 
loop_
 _geom_torsion_atom_site_label_1
 _geom_torsion_atom_site_label_2
 _geom_torsion_atom_site_label_3
 _geom_torsion_atom_site_label_4
 _geom_torsion
 _geom_torsion_site_symmetry_1
 _geom_torsion_site_symmetry_2
 _geom_torsion_site_symmetry_3
 _geom_torsion_site_symmetry_4
 _geom_torsion_publ_flag
B1 N1 C1 N2 1.8(3) . . . . ?
B1 N1 C1 C3 -176.71(19) . . . . ?
C41 N3 C11 C12 174.83(17) . . . . ?
C21 N3 C11 C12 54.1(2) . . . . ?
C31 N3 C11 C12 -64.3(2) . . . . ?
N3 C11 C12 C13 165.54(18) . . . . ?
C11 C12 C13 C14 -75.2(3) . . . . ?
C41 N3 C21 C22 -58.0(2) . . . . ?
C31 N3 C21 C22 -179.51(16) . . . . ?
C11 N3 C21 C22 59.7(2) . . . . ?
N3 C21 C22 C23 -173.46(16) . . . . ?
C21 C22 C23 C24 178.90(18) . . . . ?
C41 N3 C31 C32 54.4(2) . . . . ?
C21 N3 C31 C32 175.93(17) . . . . ?
C11 N3 C31 C32 -63.2(2) . . . . ?
N3 C31 C32 C33 174.92(17) . . . . ?
C31 C32 C33 C34 -73.7(3) . . . . ?
C21 N3 C41 C42 -61.8(2) . . . . ?
C31 N3 C41 C42 57.1(2) . . . . ?
C11 N3 C41 C42 177.66(18) . . . . ?
N3 C41 C42 C43 -174.36(19) . . . . ?
C41 C42 C43 C44 171.8(3) . . . . ?
C1 N1 B1 B4 161.33(18) . . . . ?
C1 N1 B1 B5 -129.5(2) . . . . ?
C1 N1 B1 B2 17.8(3) . . . . ?
C1 N1 B1 B6 -57.7(3) . . . . ?
C1 N1 B1 B3 91.3(2) . . . . ?
N1 B1 B2 B8 146.16(17) . . . . ?
B4 B1 B2 B8 0.08(19) . . . . ?
B5 B1 B2 B8 -63.83(18) . . . . ?
B6 B1 B2 B8 -101.51(16) . . . . ?
B3 B1 B2 B8 37.67(14) . . . . ?
N1 B1 B2 B7 -150.26(17) . . . . ?
B4 B1 B2 B7 63.66(18) . . . . ?
B5 B1 B2 B7 -0.25(18) . . . . ?
B6 B1 B2 B7 -37.93(13) . . . . ?
B3 B1 B2 B7 101.25(16) . . . . ?
N1 B1 B2 B3 108.5(2) . . . . ?
B4 B1 B2 B3 -37.59(14) . . . . ?
B5 B1 B2 B3 -101.50(15) . . . . ?
B6 B1 B2 B3 -139.18(15) . . . . ?
N1 B1 B2 B6 -112.33(19) . . . . ?
B4 B1 B2 B6 101.59(16) . . . . ?
B5 B1 B2 B6 37.68(14) . . . . ?
B3 B1 B2 B6 139.18(15) . . . . ?
B8 B2 B3 B9 -37.42(15) . . . . ?
B7 B2 B3 B9 0.08(19) . . . . ?
B1 B2 B3 B9 100.24(16) . . . . ?
B6 B2 B3 B9 63.59(18) . . . . ?
B7 B2 B3 B8 37.51(14) . . . . ?
B1 B2 B3 B8 137.67(16) . . . . ?
B6 B2 B3 B8 101.01(16) . . . . ?
B8 B2 B3 B1 -137.67(16) . . . . ?
B7 B2 B3 B1 -100.16(15) . . . . ?
B6 B2 B3 B1 -36.65(14) . . . . ?
B8 B2 B3 B4 -100.60(17) . . . . ?
B7 B2 B3 B4 -63.09(18) . . . . ?
B1 B2 B3 B4 37.07(14) . . . . ?
B6 B2 B3 B4 0.4(2) . . . . ?
N1 B1 B3 B9 142.73(17) . . . . ?
B4 B1 B3 B9 37.39(14) . . . . ?
B5 B1 B3 B9 0.1(2) . . . . ?
B2 B1 B3 B9 -100.80(16) . . . . ?
B6 B1 B3 B9 -64.06(18) . . . . ?
N1 B1 B3 B8 -154.15(16) . . . . ?
B4 B1 B3 B8 100.51(17) . . . . ?
B5 B1 B3 B8 63.18(19) . . . . ?
B2 B1 B3 B8 -37.68(15) . . . . ?
B6 B1 B3 B8 -0.9(2) . . . . ?
N1 B1 B3 B2 -116.47(19) . . . . ?
B4 B1 B3 B2 138.19(15) . . . . ?
B5 B1 B3 B2 100.86(16) . . . . ?
B6 B1 B3 B2 36.74(14) . . . . ?
N1 B1 B3 B4 105.34(18) . . . . ?
B5 B1 B3 B4 -37.33(14) . . . . ?
B2 B1 B3 B4 -138.19(15) . . . . ?
B6 B1 B3 B4 -101.45(16) . . . . ?
N1 B1 B4 B10 146.99(16) . . . . ?
B5 B1 B4 B10 37.81(14) . . . . ?
B2 B1 B4 B10 -63.39(19) . . . . ?
B6 B1 B4 B10 0.40(19) . . . . ?
B3 B1 B4 B10 -100.81(16) . . . . ?
N1 B1 B4 B9 -149.45(16) . . . . ?
B5 B1 B4 B9 101.38(16) . . . . ?
B2 B1 B4 B9 0.2(2) . . . . ?
B6 B1 B4 B9 63.97(18) . . . . ?
B3 B1 B4 B9 -37.25(15) . . . . ?
N1 B1 B4 B5 109.17(17) . . . . ?
B2 B1 B4 B5 -101.20(15) . . . . ?
B6 B1 B4 B5 -37.41(14) . . . . ?
B3 B1 B4 B5 -138.63(15) . . . . ?
N1 B1 B4 B3 -112.20(18) . . . . ?
B5 B1 B4 B3 138.63(15) . . . . ?
B2 B1 B4 B3 37.43(14) . . . . ?
B6 B1 B4 B3 101.22(15) . . . . ?
B9 B3 B4 B10 -37.39(14) . . . . ?
B8 B3 B4 B10 0.15(19) . . . . ?
B2 B3 B4 B10 63.34(19) . . . . ?
B1 B3 B4 B10 100.56(16) . . . . ?
B9 B3 B4 B1 -137.95(16) . . . . ?
B8 B3 B4 B1 -100.41(16) . . . . ?
B2 B3 B4 B1 -37.22(14) . . . . ?
B8 B3 B4 B9 37.54(14) . . . . ?
B2 B3 B4 B9 100.72(17) . . . . ?
B1 B3 B4 B9 137.95(16) . . . . ?
B9 B3 B4 B5 -100.91(16) . . . . ?
B8 B3 B4 B5 -63.37(18) . . . . ?
B2 B3 B4 B5 -0.2(2) . . . . ?
B1 B3 B4 B5 37.04(14) . . . . ?
N1 B1 B5 B11 152.84(15) . . . . ?
B4 B1 B5 B11 -100.75(16) . . . . ?
B2 B1 B5 B11 0.23(19) . . . . ?
B6 B1 B5 B11 37.82(13) . . . . ?
B3 B1 B5 B11 -63.41(18) . . . . ?
N1 B1 B5 B10 -143.85(16) . . . . ?
B4 B1 B5 B10 -37.44(14) . . . . ?
B2 B1 B5 B10 63.54(18) . . . . ?
B6 B1 B5 B10 101.12(16) . . . . ?
B3 B1 B5 B10 -0.1(2) . . . . ?
N1 B1 B5 B4 -106.41(18) . . . . ?
B2 B1 B5 B4 100.98(15) . . . . ?
B6 B1 B5 B4 138.57(15) . . . . ?
B3 B1 B5 B4 37.34(14) . . . . ?
N1 B1 B5 B6 115.03(17) . . . . ?
B4 B1 B5 B6 -138.57(15) . . . . ?
B2 B1 B5 B6 -37.58(13) . . . . ?
B3 B1 B5 B6 -101.22(15) . . . . ?
B10 B4 B5 B11 -37.14(15) . . . . ?
B1 B4 B5 B11 100.48(15) . . . . ?
B9 B4 B5 B11 0.4(2) . . . . ?
B3 B4 B5 B11 63.37(18) . . . . ?
B10 B4 B5 B1 -137.62(15) . . . . ?
B9 B4 B5 B1 -100.12(16) . . . . ?
B3 B4 B5 B1 -37.11(14) . . . . ?
B1 B4 B5 B10 137.62(15) . . . . ?
B9 B4 B5 B10 37.50(15) . . . . ?
B3 B4 B5 B10 100.51(16) . . . . ?
B10 B4 B5 B6 -100.63(16) . . . . ?
B1 B4 B5 B6 37.00(14) . . . . ?
B9 B4 B5 B6 -63.13(19) . . . . ?
B3 B4 B5 B6 -0.1(2) . . . . ?
N1 B1 B6 B7 153.45(17) . . . . ?
B4 B1 B6 B7 -62.89(18) . . . . ?
B5 B1 B6 B7 -100.28(16) . . . . ?
B2 B1 B6 B7 37.86(14) . . . . ?
B3 B1 B6 B7 1.19(19) . . . . ?
N1 B1 B6 B2 115.6(2) . . . . ?
B4 B1 B6 B2 -100.75(15) . . . . ?
B5 B1 B6 B2 -138.14(15) . . . . ?
B3 B1 B6 B2 -36.67(14) . . . . ?
N1 B1 B6 B11 -143.74(17) . . . . ?
B4 B1 B6 B11 -0.08(19) . . . . ?
B5 B1 B6 B11 -37.46(13) . . . . ?
B2 B1 B6 B11 100.67(15) . . . . ?
B3 B1 B6 B11 64.00(18) . . . . ?
N1 B1 B6 B5 -106.28(19) . . . . ?
B4 B1 B6 B5 37.38(14) . . . . ?
B2 B1 B6 B5 138.14(15) . . . . ?
B3 B1 B6 B5 101.47(16) . . . . ?
B8 B2 B6 B7 -37.17(14) . . . . ?
B1 B2 B6 B7 -137.35(15) . . . . ?
B3 B2 B6 B7 -100.62(16) . . . . ?
B8 B2 B6 B1 100.18(16) . . . . ?
B7 B2 B6 B1 137.35(15) . . . . ?
B3 B2 B6 B1 36.73(14) . . . . ?
B8 B2 B6 B11 0.12(19) . . . . ?
B7 B2 B6 B11 37.29(14) . . . . ?
B1 B2 B6 B11 -100.06(15) . . . . ?
B3 B2 B6 B11 -63.33(18) . . . . ?
B8 B2 B6 B5 62.97(18) . . . . ?
B7 B2 B6 B5 100.13(16) . . . . ?
B1 B2 B6 B5 -37.22(13) . . . . ?
B3 B2 B6 B5 -0.49(19) . . . . ?
B11 B5 B6 B7 -37.27(14) . . . . ?
B1 B5 B6 B7 100.36(15) . . . . ?
B10 B5 B6 B7 0.53(19) . . . . ?
B4 B5 B6 B7 63.43(18) . . . . ?
B11 B5 B6 B1 -137.64(14) . . . . ?
B10 B5 B6 B1 -99.83(16) . . . . ?
B4 B5 B6 B1 -36.93(13) . . . . ?
B11 B5 B6 B2 -100.34(15) . . . . ?
B1 B5 B6 B2 37.30(13) . . . . ?
B10 B5 B6 B2 -62.53(18) . . . . ?
B4 B5 B6 B2 0.37(19) . . . . ?
B1 B5 B6 B11 137.64(14) . . . . ?
B10 B5 B6 B11 37.80(14) . . . . ?
B4 B5 B6 B11 100.71(16) . . . . ?
B8 B2 B7 B11 100.95(16) . . . . ?
B1 B2 B7 B11 0.17(19) . . . . ?
B3 B2 B7 B11 63.65(18) . . . . ?
B6 B2 B7 B11 -37.77(14) . . . . ?
B8 B2 B7 B12 37.12(14) . . . . ?
B1 B2 B7 B12 -63.66(18) . . . . ?
B3 B2 B7 B12 -0.17(19) . . . . ?
B6 B2 B7 B12 -101.60(16) . . . . ?
B8 B2 B7 B6 138.72(15) . . . . ?
B1 B2 B7 B6 37.94(13) . . . . ?
B3 B2 B7 B6 101.42(15) . . . . ?
B1 B2 B7 B8 -100.78(16) . . . . ?
B3 B2 B7 B8 -37.30(14) . . . . ?
B6 B2 B7 B8 -138.72(15) . . . . ?
B1 B6 B7 B11 100.10(15) . . . . ?
B2 B6 B7 B11 137.99(15) . . . . ?
B5 B6 B7 B11 37.23(14) . . . . ?
B1 B6 B7 B12 62.55(18) . . . . ?
B2 B6 B7 B12 100.44(16) . . . . ?
B11 B6 B7 B12 -37.55(15) . . . . ?
B5 B6 B7 B12 -0.3(2) . . . . ?
B1 B6 B7 B2 -37.89(14) . . . . ?
B11 B6 B7 B2 -137.99(15) . . . . ?
B5 B6 B7 B2 -100.76(15) . . . . ?
B1 B6 B7 B8 -1.0(2) . . . . ?
B2 B6 B7 B8 36.90(14) . . . . ?
B11 B6 B7 B8 -101.09(16) . . . . ?
B5 B6 B7 B8 -63.86(19) . . . . ?
B2 B3 B8 B9 -138.01(16) . . . . ?
B1 B3 B8 B9 -100.34(17) . . . . ?
B4 B3 B8 B9 -37.54(14) . . . . ?
B9 B3 B8 B2 138.01(16) . . . . ?
B1 B3 B8 B2 37.67(14) . . . . ?
B4 B3 B8 B2 100.48(15) . . . . ?
B9 B3 B8 B12 37.33(14) . . . . ?
B2 B3 B8 B12 -100.68(16) . . . . ?
B1 B3 B8 B12 -63.00(19) . . . . ?
B4 B3 B8 B12 -0.20(19) . . . . ?
B9 B3 B8 B7 100.65(17) . . . . ?
B2 B3 B8 B7 -37.36(14) . . . . ?
B1 B3 B8 B7 0.3(2) . . . . ?
B4 B3 B8 B7 63.12(19) . . . . ?
B7 B2 B8 B9 -100.72(17) . . . . ?
B1 B2 B8 B9 -0.3(2) . . . . ?
B3 B2 B8 B9 37.50(15) . . . . ?
B6 B2 B8 B9 -63.71(19) . . . . ?
B7 B2 B8 B3 -138.22(16) . . . . ?
B1 B2 B8 B3 -37.80(14) . . . . ?
B6 B2 B8 B3 -101.21(16) . . . . ?
B7 B2 B8 B12 -37.08(14) . . . . ?
B1 B2 B8 B12 63.34(19) . . . . ?
B3 B2 B8 B12 101.14(17) . . . . ?
B6 B2 B8 B12 -0.1(2) . . . . ?
B1 B2 B8 B7 100.42(16) . . . . ?
B3 B2 B8 B7 138.22(16) . . . . ?
B6 B2 B8 B7 37.01(14) . . . . ?
B11 B7 B8 B9 -0.1(2) . . . . ?
B12 B7 B8 B9 -37.56(15) . . . . ?
B2 B7 B8 B9 100.87(16) . . . . ?
B6 B7 B8 B9 63.78(19) . . . . ?
B11 B7 B8 B3 -63.48(19) . . . . ?
B12 B7 B8 B3 -100.92(17) . . . . ?
B2 B7 B8 B3 37.51(15) . . . . ?
B6 B7 B8 B3 0.4(2) . . . . ?
B11 B7 B8 B2 -100.98(15) . . . . ?
B12 B7 B8 B2 -138.43(15) . . . . ?
B6 B7 B8 B2 -37.09(14) . . . . ?
B11 B7 B8 B12 37.45(14) . . . . ?
B2 B7 B8 B12 138.43(15) . . . . ?
B6 B7 B8 B12 101.34(16) . . . . ?
B2 B8 B9 B3 -37.66(14) . . . . ?
B12 B8 B9 B3 -138.40(15) . . . . ?
B7 B8 B9 B3 -101.01(16) . . . . ?
B3 B8 B9 B4 38.07(15) . . . . ?
B2 B8 B9 B4 0.4(2) . . . . ?
B12 B8 B9 B4 -100.33(17) . . . . ?
B7 B8 B9 B4 -62.9(2) . . . . ?
B3 B8 B9 B12 138.40(15) . . . . ?
B2 B8 B9 B12 100.75(16) . . . . ?
B7 B8 B9 B12 37.39(14) . . . . ?
B3 B8 B9 B10 101.25(16) . . . . ?
B2 B8 B9 B10 63.6(2) . . . . ?
B12 B8 B9 B10 -37.15(15) . . . . ?
B7 B8 B9 B10 0.2(2) . . . . ?
B2 B3 B9 B8 37.43(14) . . . . ?
B1 B3 B9 B8 100.60(16) . . . . ?
B4 B3 B9 B8 137.84(16) . . . . ?
B8 B3 B9 B4 -137.84(16) . . . . ?
B2 B3 B9 B4 -100.41(15) . . . . ?
B1 B3 B9 B4 -37.24(14) . . . . ?
B8 B3 B9 B12 -37.39(15) . . . . ?
B2 B3 B9 B12 0.0(2) . . . . ?
B1 B3 B9 B12 63.20(19) . . . . ?
B4 B3 B9 B12 100.45(17) . . . . ?
B8 B3 B9 B10 -100.59(17) . . . . ?
B2 B3 B9 B10 -63.16(19) . . . . ?
B1 B3 B9 B10 0.0(2) . . . . ?
B4 B3 B9 B10 37.25(14) . . . . ?
B10 B4 B9 B8 100.38(17) . . . . ?
B1 B4 B9 B8 -0.4(2) . . . . ?
B5 B4 B9 B8 63.0(2) . . . . ?
B3 B4 B9 B8 -37.88(15) . . . . ?
B10 B4 B9 B3 138.27(15) . . . . ?
B1 B4 B9 B3 37.52(14) . . . . ?
B5 B4 B9 B3 100.85(16) . . . . ?
B10 B4 B9 B12 36.69(15) . . . . ?
B1 B4 B9 B12 -64.06(19) . . . . ?
B5 B4 B9 B12 -0.7(2) . . . . ?
B3 B4 B9 B12 -101.58(16) . . . . ?
B1 B4 B9 B10 -100.75(16) . . . . ?
B5 B4 B9 B10 -37.42(15) . . . . ?
B3 B4 B9 B10 -138.27(15) . . . . ?
B1 B4 B10 B12 63.41(19) . . . . ?
B9 B4 B10 B12 -37.10(14) . . . . ?
B5 B4 B10 B12 101.17(16) . . . . ?
B3 B4 B10 B12 0.0(2) . . . . ?
B1 B4 B10 B5 -37.75(14) . . . . ?
B9 B4 B10 B5 -138.26(15) . . . . ?
B3 B4 B10 B5 -101.21(16) . . . . ?
B1 B4 B10 B9 100.51(16) . . . . ?
B5 B4 B10 B9 138.26(15) . . . . ?
B3 B4 B10 B9 37.05(14) . . . . ?
B1 B4 B10 B11 -0.6(2) . . . . ?
B9 B4 B10 B11 -101.08(17) . . . . ?
B5 B4 B10 B11 37.18(14) . . . . ?
B3 B4 B10 B11 -64.03(19) . . . . ?
B11 B5 B10 B4 138.48(16) . . . . ?
B1 B5 B10 B4 37.53(14) . . . . ?
B6 B5 B10 B4 100.68(16) . . . . ?
B11 B5 B10 B12 37.25(15) . . . . ?
B1 B5 B10 B12 -63.69(19) . . . . ?
B4 B5 B10 B12 -101.22(17) . . . . ?
B6 B5 B10 B12 -0.5(2) . . . . ?
B11 B5 B10 B9 101.05(17) . . . . ?
B1 B5 B10 B9 0.1(2) . . . . ?
B4 B5 B10 B9 -37.43(15) . . . . ?
B6 B5 B10 B9 63.25(19) . . . . ?
B1 B5 B10 B11 -100.94(16) . . . . ?
B4 B5 B10 B11 -138.48(16) . . . . ?
B6 B5 B10 B11 -37.80(14) . . . . ?
B8 B9 B10 B4 -101.34(17) . . . . ?
B3 B9 B10 B4 -37.66(14) . . . . ?
B12 B9 B10 B4 -138.74(16) . . . . ?
B8 B9 B10 B12 37.40(15) . . . . ?
B3 B9 B10 B12 101.09(16) . . . . ?
B4 B9 B10 B12 138.74(16) . . . . ?
B8 B9 B10 B5 -63.75(19) . . . . ?
B3 B9 B10 B5 -0.1(2) . . . . ?
B4 B9 B10 B5 37.59(14) . . . . ?
B12 B9 B10 B5 -101.16(17) . . . . ?
B8 B9 B10 B11 -0.3(2) . . . . ?
B3 B9 B10 B11 63.41(19) . . . . ?
B4 B9 B10 B11 101.06(16) . . . . ?
B12 B9 B10 B11 -37.68(15) . . . . ?
B12 B7 B11 B5 100.58(16) . . . . ?
B2 B7 B11 B5 -0.03(19) . . . . ?
B6 B7 B11 B5 -37.75(14) . . . . ?
B8 B7 B11 B5 63.30(18) . . . . ?
B12 B7 B11 B10 37.22(14) . . . . ?
B2 B7 B11 B10 -63.39(18) . . . . ?
B6 B7 B11 B10 -101.11(16) . . . . ?
B8 B7 B11 B10 -0.1(2) . . . . ?
B2 B7 B11 B12 -100.60(16) . . . . ?
B6 B7 B11 B12 -138.33(15) . . . . ?
B8 B7 B11 B12 -37.28(14) . . . . ?
B12 B7 B11 B6 138.33(15) . . . . ?
B2 B7 B11 B6 37.72(14) . . . . ?
B8 B7 B11 B6 101.05(16) . . . . ?
B1 B5 B11 B7 -0.13(19) . . . . ?
B10 B5 B11 B7 -100.10(16) . . . . ?
B4 B5 B11 B7 -63.21(18) . . . . ?
B6 B5 B11 B7 37.61(14) . . . . ?
B1 B5 B11 B10 99.97(16) . . . . ?
B4 B5 B11 B10 36.90(14) . . . . ?
B6 B5 B11 B10 137.71(15) . . . . ?
B1 B5 B11 B12 63.22(18) . . . . ?
B10 B5 B11 B12 -36.75(15) . . . . ?
B4 B5 B11 B12 0.1(2) . . . . ?
B6 B5 B11 B12 100.96(16) . . . . ?
B1 B5 B11 B6 -37.74(13) . . . . ?
B10 B5 B11 B6 -137.71(15) . . . . ?
B4 B5 B11 B6 -100.81(16) . . . . ?
B4 B10 B11 B7 63.85(19) . . . . ?
B12 B10 B11 B7 -37.40(14) . . . . ?
B5 B10 B11 B7 101.24(16) . . . . ?
B9 B10 B11 B7 0.2(2) . . . . ?
B4 B10 B11 B5 -37.40(15) . . . . ?
B12 B10 B11 B5 -138.64(16) . . . . ?
B9 B10 B11 B5 -101.04(17) . . . . ?
B4 B10 B11 B12 101.24(17) . . . . ?
B5 B10 B11 B12 138.64(16) . . . . ?
B9 B10 B11 B12 37.60(15) . . . . ?
B4 B10 B11 B6 0.5(2) . . . . ?
B12 B10 B11 B6 -100.71(16) . . . . ?
B5 B10 B11 B6 37.93(14) . . . . ?
B9 B10 B11 B6 -63.11(19) . . . . ?
B1 B6 B11 B7 -100.43(15) . . . . ?
B2 B6 B11 B7 -37.36(14) . . . . ?
B5 B6 B11 B7 -137.95(15) . . . . ?
B7 B6 B11 B5 137.95(15) . . . . ?
B1 B6 B11 B5 37.52(13) . . . . ?
B2 B6 B11 B5 100.59(15) . . . . ?
B7 B6 B11 B10 100.16(16) . . . . ?
B1 B6 B11 B10 -0.28(19) . . . . ?
B2 B6 B11 B10 62.80(18) . . . . ?
B5 B6 B11 B10 -37.79(14) . . . . ?
B7 B6 B11 B12 37.23(14) . . . . ?
B1 B6 B11 B12 -63.21(18) . . . . ?
B2 B6 B11 B12 -0.13(19) . . . . ?
B5 B6 B11 B12 -100.72(16) . . . . ?
B4 B10 B12 B7 -63.69(19) . . . . ?
B5 B10 B12 B7 0.3(2) . . . . ?
B9 B10 B12 B7 -100.73(17) . . . . ?
B11 B10 B12 B7 37.40(14) . . . . ?
B4 B10 B12 B9 37.04(15) . . . . ?
B5 B10 B12 B9 101.08(17) . . . . ?
B11 B10 B12 B9 138.13(16) . . . . ?
B4 B10 B12 B8 -0.1(2) . . . . ?
B5 B10 B12 B8 63.96(19) . . . . ?
B9 B10 B12 B8 -37.12(15) . . . . ?
B11 B10 B12 B8 101.01(16) . . . . ?
B4 B10 B12 B11 -101.10(17) . . . . ?
B5 B10 B12 B11 -37.05(15) . . . . ?
B9 B10 B12 B11 -138.13(16) . . . . ?
B11 B7 B12 B10 -37.56(15) . . . . ?
B2 B7 B12 B10 63.75(19) . . . . ?
B6 B7 B12 B10 0.0(2) . . . . ?
B8 B7 B12 B10 100.80(17) . . . . ?
B11 B7 B12 B9 -101.11(16) . . . . ?
B2 B7 B12 B9 0.2(2) . . . . ?
B6 B7 B12 B9 -63.57(19) . . . . ?
B8 B7 B12 B9 37.25(15) . . . . ?
B11 B7 B12 B8 -138.37(15) . . . . ?
B2 B7 B12 B8 -37.06(14) . . . . ?
B6 B7 B12 B8 -100.82(16) . . . . ?
B2 B7 B12 B11 101.31(15) . . . . ?
B6 B7 B12 B11 37.55(14) . . . . ?
B8 B7 B12 B11 138.37(15) . . . . ?
B8 B9 B12 B10 -138.24(16) . . . . ?
B3 B9 B12 B10 -100.85(17) . . . . ?
B4 B9 B12 B10 -36.71(15) . . . . ?
B8 B9 B12 B7 -37.54(15) . . . . ?
B3 B9 B12 B7 -0.1(2) . . . . ?
B4 B9 B12 B7 63.99(19) . . . . ?
B10 B9 B12 B7 100.70(16) . . . . ?
B3 B9 B12 B8 37.39(14) . . . . ?
B4 B9 B12 B8 101.52(17) . . . . ?
B10 B9 B12 B8 138.24(16) . . . . ?
B8 B9 B12 B11 -100.71(17) . . . . ?
B3 B9 B12 B11 -63.3(2) . . . . ?
B4 B9 B12 B11 0.8(2) . . . . ?
B10 B9 B12 B11 37.53(15) . . . . ?
B9 B8 B12 B10 37.38(15) . . . . ?
B3 B8 B12 B10 0.2(2) . . . . ?
B2 B8 B12 B10 -63.56(19) . . . . ?
B7 B8 B12 B10 -100.69(16) . . . . ?
B9 B8 B12 B7 138.07(16) . . . . ?
B3 B8 B12 B7 100.86(16) . . . . ?
B2 B8 B12 B7 37.12(14) . . . . ?
B3 B8 B12 B9 -37.20(14) . . . . ?
B2 B8 B12 B9 -100.95(17) . . . . ?
B7 B8 B12 B9 -138.07(16) . . . . ?
B9 B8 B12 B11 100.93(17) . . . . ?
B3 B8 B12 B11 63.73(19) . . . . ?
B2 B8 B12 B11 0.0(2) . . . . ?
B7 B8 B12 B11 -37.14(14) . . . . ?
B7 B11 B12 B10 137.97(16) . . . . ?
B5 B11 B12 B10 36.96(15) . . . . ?
B6 B11 B12 B10 100.71(16) . . . . ?
B5 B11 B12 B7 -101.00(16) . . . . ?
B10 B11 B12 B7 -137.97(16) . . . . ?
B6 B11 B12 B7 -37.26(14) . . . . ?
B7 B11 B12 B9 100.41(17) . . . . ?
B5 B11 B12 B9 -0.6(2) . . . . ?
B10 B11 B12 B9 -37.56(15) . . . . ?
B6 B11 B12 B9 63.15(19) . . . . ?
B7 B11 B12 B8 37.35(14) . . . . ?
B5 B11 B12 B8 -63.65(19) . . . . ?
B10 B11 B12 B8 -100.62(17) . . . . ?
B6 B11 B12 B8 0.1(2) . . . . ?
 
_refine_diff_density_max    0.276
_refine_diff_density_min   -0.208
_refine_diff_density_rms    0.035

_shelx_res_file
;
TITL Zh202_RT in P2(1)/n
    Zh202.res
    created by SHELXL-2018/3 at 12:02:09 on 13-Mar-2020
CELL 0.71073  11.1175  12.6408  20.8691  90.000  92.663  90.000
ZERR    4.00   0.0005   0.0005   0.0010   0.000   0.002   0.000
LATT 1
SYMM 0.5-X, 0.5+Y, 0.5-Z
SFAC C  H   B  N
UNIT 72 212 48 12
TEMP 23
SIZE 0.36 0.22 0.20
L.S. 8
BOND $H
FMAP 2
PLAN 20
ACTA
CONF
SHEL 5 0.5
OMIT -2 55
OMIT    -2   4   3
OMIT    -3   2   4
OMIT    -1   6   2
OMIT    -3   3  10
OMIT    -7   3   6
OMIT     2   3   7
OMIT     0   5   9
OMIT     0   3   8
WGHT    0.092800    0.536900
FVAR       0.15581
N1    4    0.197673    0.486878    0.551207    11.00000    0.03707    0.05385 =
         0.05038   -0.00795    0.00834   -0.00117
AFIX  43
H1A   2    0.123690    0.498614    0.559260    11.00000   -1.20000
AFIX   0
N2    4    0.390251    0.535661    0.576410    11.00000    0.04887    0.10053 =
         0.11107   -0.05544    0.01595   -0.02244
AFIX  93
H2A   2    0.416022    0.492692    0.548190    11.00000   -1.20000
H2B   2    0.440424    0.573565    0.599057    11.00000   -1.20000
AFIX   0
N3    4    0.772810    0.191321    0.624216    11.00000    0.04133    0.03950 =
         0.03799    0.00611    0.00203   -0.00381
C1    1    0.275126    0.543337    0.584856    11.00000    0.04703    0.04488 =
         0.04931   -0.00220    0.00838   -0.00659
C3    1    0.236612    0.616783    0.635212    11.00000    0.07423    0.06065 =
         0.06547   -0.01830    0.01301   -0.00960
AFIX 137
H3A   2    0.298516    0.668427    0.643978    11.00000   -1.50000
H3B   2    0.222612    0.577719    0.673604    11.00000   -1.50000
H3C   2    0.163732    0.651831    0.620708    11.00000   -1.50000
AFIX   0
C11   1    0.856604    0.097155    0.635065    11.00000    0.05153    0.04106 =
         0.04991    0.00819   -0.00551   -0.00031
AFIX  23
H11A  2    0.878043    0.092340    0.680559    11.00000   -1.20000
H11B  2    0.812787    0.033307    0.622977    11.00000   -1.20000
AFIX   0
C12   1    0.971631    0.100096    0.598793    11.00000    0.05239    0.06318 =
         0.07512    0.00264    0.00615    0.00910
AFIX  23
H12A  2    0.952824    0.085759    0.553776    11.00000   -1.20000
H12B  2    1.006498    0.170333    0.602131    11.00000   -1.20000
AFIX   0
C13   1    1.062267    0.020061    0.624551    11.00000    0.05832    0.06802 =
         0.11661   -0.00998   -0.01043    0.01356
AFIX  23
H13A  2    1.021796   -0.047047    0.630204    11.00000   -1.20000
H13B  2    1.122892    0.009674    0.593188    11.00000   -1.20000
AFIX   0
C14   1    1.123092    0.051954    0.686915    11.00000    0.08044    0.12184 =
         0.12678    0.00646   -0.03602    0.01625
AFIX  33
H14A  2    1.179405   -0.001875    0.700758    11.00000   -1.50000
H14B  2    1.165056    0.117493    0.681513    11.00000   -1.50000
H14C  2    1.063901    0.060739    0.718550    11.00000   -1.50000
AFIX   0
C21   1    0.743177    0.207804    0.553118    11.00000    0.04975    0.04475 =
         0.03833    0.00735    0.00035    0.00056
AFIX  23
H21A  2    0.691539    0.269387    0.548118    11.00000   -1.20000
H21B  2    0.817329    0.223382    0.532276    11.00000   -1.20000
AFIX   0
C22   1    0.682211    0.116031    0.518759    11.00000    0.05553    0.05526 =
         0.04486    0.00351   -0.00491   -0.00583
AFIX  23
H22A  2    0.602969    0.105378    0.535251    11.00000   -1.20000
H22B  2    0.728840    0.052144    0.526780    11.00000   -1.20000
AFIX   0
C23   1    0.670255    0.136389    0.447368    11.00000    0.06047    0.06895 =
         0.04528    0.00590   -0.00128    0.00806
AFIX  23
H23A  2    0.749594    0.148849    0.431418    11.00000   -1.20000
H23B  2    0.622742    0.199874    0.439680    11.00000   -1.20000
AFIX   0
C24   1    0.611541    0.045303    0.410488    11.00000    0.07377    0.09407 =
         0.05163   -0.01376   -0.00935    0.00398
AFIX  33
H24A  2    0.606105    0.062134    0.365590    11.00000   -1.50000
H24B  2    0.659097   -0.017473    0.417127    11.00000   -1.50000
H24C  2    0.532236    0.033556    0.425390    11.00000   -1.50000
AFIX   0
C31   1    0.832000    0.292604    0.649100    11.00000    0.05038    0.04231 =
         0.04749    0.00126    0.00120   -0.00568
AFIX  23
H31A  2    0.905962    0.303018    0.627024    11.00000   -1.20000
H31B  2    0.779069    0.351421    0.637903    11.00000   -1.20000
AFIX   0
C32   1    0.861355    0.296217    0.720491    11.00000    0.08134    0.07416 =
         0.04629   -0.00709    0.00620   -0.02426
AFIX  23
H32A  2    0.909280    0.234797    0.732899    11.00000   -1.20000
H32B  2    0.787192    0.293262    0.743142    11.00000   -1.20000
AFIX   0
C33   1    0.929796    0.395591    0.739869    11.00000    0.07614    0.06240 =
         0.06822   -0.01210   -0.00828   -0.00504
AFIX  23
H33A  2    0.889419    0.456114    0.720035    11.00000   -1.20000
H33B  2    0.927854    0.404150    0.786000    11.00000   -1.20000
AFIX   0
C34   1    1.057056    0.394682    0.721448    11.00000    0.09337    0.15674 =
         0.08511   -0.01586   -0.00111   -0.05511
AFIX  33
H34A  2    1.095428    0.459488    0.734978    11.00000   -1.50000
H34B  2    1.098281    0.335987    0.741725    11.00000   -1.50000
H34C  2    1.059822    0.387984    0.675718    11.00000   -1.50000
AFIX   0
C41   1    0.660508    0.166187    0.659811    11.00000    0.04544    0.06936 =
         0.04382    0.00515    0.00579   -0.01138
AFIX  23
H41A  2    0.625265    0.101886    0.641860    11.00000   -1.20000
H41B  2    0.684335    0.151727    0.704252    11.00000   -1.20000
AFIX   0
C42   1    0.564963    0.250403    0.658403    11.00000    0.05182    0.09804 =
         0.08278   -0.00762    0.01677    0.00314
AFIX  23
H42A  2    0.532142    0.260066    0.614916    11.00000   -1.20000
H42B  2    0.599245    0.317071    0.673283    11.00000   -1.20000
AFIX   0
C43   1    0.464022    0.215287    0.702682    11.00000    0.06577    0.13946 =
         0.09348   -0.01321    0.01974    0.01035
AFIX  23
H43A  2    0.424128    0.153504    0.684109    11.00000   -1.20000
H43B  2    0.500401    0.194764    0.743970    11.00000   -1.20000
AFIX   0
C44   1    0.375349    0.295636    0.712544    11.00000    0.08625    0.18673 =
         0.13805   -0.04132    0.03440    0.01357
AFIX  33
H44A  2    0.315854    0.268846    0.740233    11.00000   -1.50000
H44B  2    0.413645    0.356521    0.731950    11.00000   -1.50000
H44C  2    0.337304    0.315223    0.672036    11.00000   -1.50000
AFIX   0
B1    3    0.215832    0.403064    0.499690    11.00000    0.03654    0.04033 =
         0.04295   -0.00137    0.00408   -0.00085
B2    3    0.352253    0.334709    0.486200    11.00000    0.03580    0.04496 =
         0.04853    0.00149   -0.00053    0.00513
H2    2    0.439016    0.351420    0.514625    11.00000   -1.20000
B3    3    0.230260    0.266488    0.520029    11.00000    0.05441    0.04526 =
         0.04329    0.00618    0.00542   -0.00120
H3    2    0.233441    0.243369    0.570114    11.00000   -1.20000
B4    3    0.093984    0.315631    0.482137    11.00000    0.03745    0.04837 =
         0.05079   -0.00356    0.01004   -0.00550
H4    2    0.009960    0.324714    0.506951    11.00000   -1.20000
B5    3    0.132199    0.414113    0.425355    11.00000    0.03653    0.04618 =
         0.04824    0.00231    0.00010    0.00497
H5    2    0.071349    0.482010    0.416263    11.00000   -1.20000
B6    3    0.292613    0.426430    0.428062    11.00000    0.03734    0.04106 =
         0.04438    0.00329    0.00552   -0.00099
H6    2    0.340356    0.504784    0.419662    11.00000   -1.20000
B7    3    0.351965    0.303173    0.403220    11.00000    0.03970    0.04289 =
         0.04963   -0.00200    0.00934    0.00117
H7    2    0.437030    0.296313    0.375812    11.00000   -1.20000
B8    3    0.314003    0.204873    0.460161    11.00000    0.04977    0.04070 =
         0.05598    0.00272    0.00449    0.00502
H8    2    0.376106    0.137138    0.470342    11.00000   -1.20000
B9    3    0.155465    0.193159    0.458042    11.00000    0.05025    0.04238 =
         0.05522   -0.00238    0.01056   -0.00748
H9    2    0.112505    0.115902    0.467233    11.00000   -1.20000
B10   3    0.095124    0.283548    0.399695    11.00000    0.04187    0.05561 =
         0.05089   -0.00614   -0.00199   -0.00334
H10   2    0.007460    0.265989    0.371034    11.00000   -1.20000
B11   3    0.216695    0.352018    0.365788    11.00000    0.04947    0.04999 =
         0.03784    0.00315    0.00189    0.00068
H11   2    0.212909    0.381568    0.315372    11.00000   -1.20000
B12   3    0.230232    0.215223    0.385742    11.00000    0.05017    0.04547 =
         0.04714   -0.00632    0.00822   -0.00334
H12   2    0.240027    0.151656    0.349390    11.00000   -1.20000

HKLF 4


REM  Zh202_RT in P2(1)/n
REM wR2 = 0.1897, GooF = S = 1.015, Restrained GooF = 1.015 for all data
REM R1 = 0.0619 for 4159 Fo > 4sig(Fo) and 0.1058 for all 6697 data
REM 332 parameters refined using 0 restraints

END

WGHT      0.0929      0.5372

REM Highest difference peak  0.276,  deepest hole -0.208,  1-sigma level  0.035
Q1    1   0.4868  0.3028  0.7037  11.00000  0.05    0.28
Q2    1   0.5720  0.3181  0.6431  11.00000  0.05    0.23
Q3    1   0.4439  0.2504  0.6638  11.00000  0.05    0.22
Q4    1   0.1511  0.5969  0.6506  11.00000  0.05    0.19
Q5    1   0.2915  0.3969  0.4807  11.00000  0.05    0.19
Q6    1   0.4537  0.2641  0.7484  11.00000  0.05    0.18
Q7    1   0.9456  0.0984  0.6362  11.00000  0.05    0.18
Q8    1   0.7200  0.1822  0.6432  11.00000  0.05    0.18
Q9    1   0.7580  0.1946  0.5888  11.00000  0.05    0.17
Q10   1   0.3805  0.1916  0.7055  11.00000  0.05    0.17
Q11   1   0.2058  0.4255  0.4335  11.00000  0.05    0.17
Q12   1   1.0324  0.0030  0.6723  11.00000  0.05    0.17
Q13   1   0.6305  0.2207  0.6576  11.00000  0.05    0.16
Q14   1   1.0796  0.0376  0.7285  11.00000  0.05    0.16
Q15   1   1.0852  0.3487  0.6866  11.00000  0.05    0.16
Q16   1   0.8040  0.1477  0.6294  11.00000  0.05    0.16
Q17   1   0.9831  0.4376  0.7224  11.00000  0.05    0.15
Q18   1   0.1026  0.2589  0.4403  11.00000  0.05    0.15
Q19   1   0.2136  0.4486  0.5267  11.00000  0.05    0.14
Q20   1   0.3497  0.2833  0.4487  11.00000  0.05    0.14
;
_shelx_res_checksum   43918

_shelx_hkl_file
;
   1   0   0   -0.50    0.02
   1   0   0   -0.50    0.02
  -1   0   0   -0.48    0.02
  -1   0   0   -0.49    0.02
  -2   0   0  283.72    7.74
   2   0   0  353.67    7.87
   2   0   0  302.82    7.69
  -2   0   0  367.09    7.89
  -3   0   0   -0.06    0.07
   3   0   0   -0.05    0.09
  -4   0   0   56.96    1.45
   4   0   0   56.10    1.46
  -5   0   0    0.06    0.10
   5   0   0    0.00    0.11
   6   0   0    5.76    0.32
  -6   0   0    4.94    0.29
   6   0   0    5.25    0.17
   7   0   0   -0.01    0.14
  -7   0   0   -0.03    0.13
   8   0   0    0.78    0.20
  -8   0   0    0.72    0.19
   9   0   0    0.19    0.19
  -9   0   0   -0.15    0.15
  10   0   0    1.56    0.28
 -10   0   0    2.01    0.29
 -11   0   0    0.34    0.21
  11   0   0   -0.14    0.19
 -12   0   0    0.22    0.21
  12   0   0    0.21    0.25
  13   0   0   -0.28    0.24
 -13   0   0    0.41    0.27
 -14   0   0    0.87    0.32
  14   0   0    0.40    0.29
   0  -1   0   -0.01    0.01
   0  -1   0    0.00    0.01
   0   1   0    0.01    0.01
   0   1   0   -0.01    0.01
   1  -1   0   -0.05    0.02
   1  -1   0   -0.07    0.03
  -1  -1   0   -0.07    0.02
   1  -1   0   -0.08    0.03
  -1  -1   0   -0.05    0.03
  -1   1   0   -0.07    0.02
  -1   1   0   -0.05    0.03
   1   1   0   -0.10    0.02
  -1   1   0   -0.08    0.02
   1   1   0   -0.05    0.02
   1   1   0   -0.10    0.02
   2  -1   0    3.39    0.15
  -2  -1   0    3.18    0.15
  -2   1   0    3.10    0.14
  -2   1   0    2.77    0.14
   2   1   0    2.97    0.12
   2   1   0    3.08    0.16
   2   1   0    2.86    0.15
   3  -1   0   28.02    0.69
  -3  -1   0   27.32    0.75
   3  -1   0   27.80    0.76
   3   1   0   28.07    0.76
  -3   1   0   28.45    0.76
  -4  -1   0    1.35    0.14
   4  -1   0    1.31    0.15
   4  -1   0    1.55    0.09
   4   1   0    1.12    0.14
  -4   1   0    1.49    0.15
   4   1   0    1.56    0.12
   5  -1   0    8.56    0.37
   5  -1   0    9.12    0.25
  -5  -1   0    9.36    0.38
  -5   1   0    9.23    0.37
   5   1   0    9.31    0.39
   5   1   0    8.76    0.28
   6  -1   0    1.07    0.18
  -6  -1   0    1.16    0.18
   6   1   0    1.19    0.10
  -6   1   0    1.28    0.18
   6   1   0    1.19    0.19
  -7  -1   0    4.87    0.33
   7  -1   0    4.42    0.31
   7   1   0    4.22    0.31
  -7   1   0    4.53    0.31
   7   1   0    4.64    0.19
   8  -1   0   19.33    0.71
  -8  -1   0   18.89    0.70
  -8   1   0   19.22    0.72
   8   1   0   18.68    0.71
   8   1   0   18.75    0.52
  -9  -1   0    0.35    0.20
   9  -1   0    0.29    0.22
   9   1   0    0.13    0.20
  -9   1   0    0.63    0.20
  10  -1   0    0.46    0.22
 -10  -1   0    0.51    0.22
 -10   1   0    0.15    0.19
  10   1   0    0.47    0.24
  11  -1   0    2.09    0.32
 -11  -1   0    1.77    0.30
 -11   1   0    1.78    0.31
  11   1   0    2.71    0.36
  12  -1   0    0.33    0.25
 -12  -1   0   -0.29    0.19
  12   1   0    0.21    0.25
 -12   1   0    0.19    0.21
 -13  -1   0   -0.22    0.21
  13  -1   0    0.07    0.26
  13   1   0   -0.12    0.22
 -13   1   0    0.28    0.24
  14  -1   0    0.30    0.27
 -14  -1   0    0.51    0.29
  14   1   0    0.09    0.28
 -14   1   0    0.54    0.31
  -1  -2   0  261.11    6.67
  -1  -2   0  295.84    6.67
   1  -2   0  292.01    6.68
  -1   2   0  290.15    6.93
   1   2   0  274.26    6.83
   2  -2   0   46.75    1.15
  -2  -2   0   46.06    1.14
   2  -2   0   46.54    1.16
  -2   2   0   46.13    1.16
   2   2   0   46.85    1.14
  -2   2   0   46.47    1.15
   2   2   0   46.10    1.15
  -2   2   0   46.45    1.15
   2   2   0   45.64    1.18
   3  -2   0    1.43    0.11
   3  -2   0    1.36    0.14
  -3  -2   0    1.57    0.13
  -3   2   0    1.27    0.13
   3   2   0    1.45    0.12
   3   2   0    1.28    0.13
  -4  -2   0    8.54    0.32
   4  -2   0    8.86    0.27
   4  -2   0    8.47    0.34
  -4   2   0    8.53    0.34
   4   2   0    8.21    0.33
   4   2   0    8.55    0.30
  -5  -2   0    8.08    0.36
   5  -2   0    8.44    0.26
   5  -2   0    8.93    0.36
   5   2   0    8.71    0.36
  -5   2   0    8.02    0.35
   5   2   0    8.84    0.30
  -6  -2   0    1.25    0.18
   6  -2   0    1.28    0.10
   6  -2   0    1.14    0.19
   6   2   0    0.96    0.18
  -6   2   0    1.11    0.18
   6   2   0    1.19    0.12
  -7  -2   0    3.58    0.29
   7  -2   0    3.46    0.30
   7   2   0    3.69    0.31
  -7   2   0    3.83    0.28
   7   2   0    3.56    0.20
   8  -2   0    1.00    0.21
  -8  -2   0    0.64    0.18
   8   2   0    0.98    0.23
  -8   2   0    0.66    0.19
   8   2   0    1.13    0.12
   9  -2   0    0.40    0.22
  -9  -2   0    0.34    0.19
  -9   2   0    0.48    0.22
   9   2   0    0.07    0.20
  10  -2   0    7.21    0.47
 -10  -2   0    6.99    0.48
  10   2   0    7.88    0.48
 -10   2   0    6.57    0.45
  11  -2   0    0.71    0.24
 -11  -2   0    0.76    0.23
 -11   2   0    0.72    0.26
  11   2   0    0.57    0.27
 -12  -2   0    5.38    0.48
  12  -2   0    5.79    0.51
 -12   2   0    4.10    0.44
  12   2   0    5.32    0.50
 -13  -2   0    0.34    0.25
  13  -2   0    0.12    0.24
 -13   2   0    0.79    0.30
  13   2   0    0.83    0.31
  14  -2   0    0.27    0.29
 -14  -2   0   -0.48    0.20
  14   2   0    0.28    0.30
 -14   2   0    0.24    0.27
   0  -3   0    0.03    0.08
   0  -3   0   -0.04    0.08
   0   3   0   -0.05    0.06
  -1  -3   0  100.00    2.40
   1  -3   0   92.07    2.39
   1  -3   0  102.27    2.47
  -1  -3   0  101.01    2.48
   1   3   0   99.66    2.47
   1   3   0  102.45    2.36
  -1   3   0  102.28    2.36
   1   3   0  100.44    2.36
  -1   3   0  100.40    2.47
  -1   3   0  100.05    2.36
   2  -3   0  112.93    2.77
   2  -3   0  112.40    2.68
  -2  -3   0  112.27    2.70
   2   3   0  112.40    2.69
   2   3   0  109.73    2.69
   2   3   0  112.50    2.78
  -2   3   0  114.15    2.77
  -2   3   0  114.92    2.70
  -2   3   0  113.83    2.70
  -3  -3   0   11.31    0.36
   3  -3   0   10.53    0.36
   3  -3   0   11.67    0.37
   3   3   0   11.63    0.39
  -3   3   0   11.46    0.38
  -3   3   0   11.28    0.36
   3   3   0   11.55    0.37
   3   3   0   11.39    0.37
  -3   3   0   11.70    0.38
   4  -3   0   35.91    0.96
  -4  -3   0   35.09    0.95
   4  -3   0   35.57    0.93
   4   3   0   35.96    0.97
  -4   3   0   36.59    0.98
   4   3   0   35.18    0.96
   5  -3   0    0.37    0.08
  -5  -3   0    0.20    0.10
   5  -3   0    0.43    0.14
   5   3   0    0.44    0.11
   5   3   0    0.31    0.13
  -5   3   0    0.36    0.13
   6  -3   0    3.88    0.27
   6  -3   0    4.36    0.19
  -6  -3   0    5.21    0.28
  -6   3   0    4.01    0.28
   6   3   0    4.43    0.31
   6   3   0    4.73    0.24
   7  -3   0    8.18    0.42
   7  -3   0    8.16    0.26
  -7  -3   0    7.99    0.40
   7   3   0    8.33    0.43
   7   3   0    8.00    0.33
  -7   3   0    7.45    0.39
   8  -3   0    0.67    0.20
  -8  -3   0    0.50    0.18
   8   3   0    0.44    0.20
   8   3   0    0.69    0.13
  -8   3   0    0.75    0.19
  -9  -3   0    0.48    0.20
   9  -3   0    0.03    0.20
  -9   3   0    0.09    0.17
   9   3   0    0.26    0.20
  10  -3   0    0.05    0.18
 -10  -3   0    0.31    0.20
  10   3   0    0.34    0.21
 -10   3   0    0.13    0.20
  11  -3   0    2.57    0.34
 -11  -3   0    2.48    0.33
  11   3   0    1.99    0.34
 -11   3   0    2.03    0.32
  12  -3   0    0.17    0.24
 -12  -3   0    0.30    0.23
  12   3   0    0.36    0.27
 -12   3   0    0.21    0.25
  13  -3   0    0.16    0.25
 -13  -3   0    0.21    0.20
 -13   3   0    0.25    0.24
  13   3   0    0.04    0.25
  14  -3   0    1.06    0.35
  14   3   0    0.98    0.33
 -14   3   0    0.69    0.32
   0  -4   0    1.58    0.16
   0  -4   0    2.21    0.18
   0   4   0    2.17    0.17
  -1  -4   0    8.39    0.33
   1  -4   0    8.02    0.32
   1  -4   0    8.34    0.31
  -1  -4   0    8.66    0.31
  -1   4   0    8.40    0.23
   1   4   0    8.07    0.22
  -1   4   0    8.10    0.32
  -1   4   0    8.07    0.23
   1   4   0    8.32    0.32
  -2  -4   0    2.70    0.11
  -2  -4   0    2.74    0.18
   2  -4   0    2.41    0.19
  -2  -4   0    2.58    0.20
  -2   4   0    2.89    0.15
   2   4   0    2.78    0.15
   2   4   0    2.45    0.20
  -2   4   0    2.67    0.21
  -2   4   0    2.67    0.16
   2   4   0    2.86    0.15
  -3  -4   0    0.43    0.11
   3  -4   0    0.65    0.10
   3  -4   0    0.49    0.11
  -3  -4   0    0.39    0.07
  -3   4   0    0.43    0.10
   3   4   0    0.45    0.11
   3   4   0    0.53    0.10
  -3   4   0    0.43    0.11
   3   4   0    0.50    0.10
  -3   4   0    0.51    0.10
   4  -4   0    0.07    0.09
  -4  -4   0   -0.04    0.09
   4  -4   0   -0.01    0.10
  -4   4   0    0.01    0.09
   4   4   0   -0.02    0.10
  -4   4   0   -0.24    0.09
   4   4   0   -0.12    0.10
   5  -4   0    6.76    0.32
   5  -4   0    6.74    0.28
  -5  -4   0    6.69    0.30
   5   4   0    6.55    0.31
   5   4   0    6.64    0.32
  -5   4   0    6.40    0.31
   6  -4   0   10.11    0.35
   6  -4   0   10.18    0.43
  -6  -4   0   10.91    0.42
   6   4   0   10.04    0.44
  -6   4   0   10.39    0.45
   6   4   0   10.09    0.41
  -7  -4   0   30.42    0.92
   7  -4   0   30.85    0.81
   7  -4   0   31.04    0.94
   7   4   0   28.00    0.93
  -7   4   0   28.64    0.93
  -8  -4   0    0.03    0.16
   8  -4   0    0.02    0.17
  -8   4   0   -0.03    0.16
   8   4   0   -0.13    0.18
   9  -4   0   -0.10    0.18
  -9  -4   0   -0.05    0.16
  -9   4   0    0.02    0.17
   9   4   0    0.12    0.19
  10  -4   0    0.85    0.23
 -10  -4   0    0.84    0.22
  10   4   0    0.53    0.24
 -10   4   0    0.65    0.23
  11  -4   0    2.42    0.34
 -11  -4   0    1.66    0.27
 -11   4   0    1.57    0.32
  11   4   0    1.91    0.33
  12  -4   0   -0.07    0.21
 -12   4   0    0.29    0.24
  12   4   0    0.22    0.25
  13  -4   0    0.27    0.26
  13   4   0    0.51    0.27
 -13   4   0    0.56    0.29
 -14   4   0    0.64    0.30
  14   4   0    0.26    0.30
   0  -5   0   -0.13    0.09
   0  -5   0    0.01    0.10
   0   5   0   -0.05    0.07
  -1  -5   0    0.05    0.10
   1  -5   0    0.07    0.10
  -1  -5   0    0.10    0.11
   1  -5   0   -0.08    0.10
  -1   5   0    0.11    0.04
   1   5   0    0.12    0.08
  -1   5   0    0.12    0.09
  -1   5   0    0.15    0.04
   2  -5   0   17.79    0.58
  -2  -5   0   18.54    0.60
  -2  -5   0   17.69    0.56
  -2   5   0   18.01    0.58
   2   5   0   18.41    0.49
  -2   5   0   18.28    0.50
   2   5   0   17.34    0.48
  -2   5   0   18.10    0.50
   3  -5   0    1.84    0.18
  -3  -5   0    1.74    0.11
  -3  -5   0    2.24    0.19
  -3   5   0    1.94    0.16
   3   5   0    1.83    0.14
  -3   5   0    2.14    0.19
   3   5   0    2.16    0.16
  -3   5   0    1.91    0.15
  -4  -5   0   15.68    0.46
   4  -5   0   15.13    0.48
   4  -5   0   15.40    0.51
  -4  -5   0   16.24    0.54
  -4   5   0   15.54    0.52
   4   5   0   15.68    0.49
  -4   5   0   15.61    0.51
   4   5   0   14.57    0.50
   5  -5   0    0.51    0.12
  -5  -5   0    0.58    0.12
   5  -5   0    0.64    0.14
   5   5   0    0.68    0.14
  -5   5   0    0.74    0.15
   6  -5   0    0.99    0.17
   6  -5   0    1.20    0.15
  -6  -5   0    1.14    0.17
  -6   5   0    1.22    0.20
   6   5   0    0.98    0.18
  -7  -5   0    2.21    0.23
   7  -5   0    1.99    0.24
   7  -5   0    2.56    0.21
  -7   5   0    1.73    0.24
   7   5   0    2.34    0.27
   8  -5   0    5.52    0.39
  -8  -5   0    5.22    0.33
   8   5   0    5.61    0.41
  -8   5   0    5.44    0.37
   9  -5   0    0.07    0.17
  -9  -5   0   -0.15    0.14
  -9   5   0   -0.19    0.17
   9   5   0    0.36    0.20
  10  -5   0    4.57    0.40
 -10  -5   0    4.70    0.35
  10   5   0    4.99    0.45
 -10   5   0    4.96    0.45
  11  -5   0    4.02    0.40
 -11   5   0    3.91    0.42
  11   5   0    3.94    0.44
 -12   5   0    0.59    0.28
  12   5   0    0.72    0.29
  13   5   0    1.38    0.34
 -13   5   0    1.72    0.36
   0  -6   0   -0.08    0.11
   0  -6   0    0.06    0.12
   1  -6   0   15.90    0.54
   1  -6   0   15.75    0.56
  -1  -6   0   16.66    0.57
  -1  -6   0   15.65    0.53
  -1   6   0   15.55    0.40
  -1   6   0   15.72    0.40
   2  -6   0    8.12    0.38
  -2  -6   0    7.49    0.34
  -2   6   0    7.81    0.26
   2   6   0    7.37    0.24
  -2   6   0    7.74    0.26
   2   6   0    7.26    0.25
   3  -6   0    3.87    0.16
   3  -6   0    3.97    0.28
  -3  -6   0    4.50    0.28
   3   6   0    3.78    0.20
   3   6   0    4.09    0.21
  -3   6   0    3.81    0.21
  -3   6   0    4.12    0.22
  -4  -6   0    4.31    0.27
   4  -6   0    4.47    0.27
  -4  -6   0    4.46    0.18
   4   6   0    4.43    0.25
  -4   6   0    3.97    0.26
  -4   6   0    4.73    0.26
   4   6   0    4.47    0.24
   5  -6   0   13.22    0.48
  -5  -6   0   12.56    0.42
   5  -6   0   13.16    0.44
  -5  -6   0   12.41    0.50
  -5   6   0   12.68    0.48
   5   6   0   13.15    0.48
  -6  -6   0    3.87    0.24
   6  -6   0    3.50    0.27
   6  -6   0    3.69    0.25
  -6   6   0    3.72    0.29
   6   6   0    3.54    0.29
   7  -6   0   16.00    0.53
  -7  -6   0   15.12    0.54
   7  -6   0   15.19    0.58
   7   6   0   13.53    0.59
  -7   6   0   15.51    0.61
   8  -6   0    0.82    0.21
  -8  -6   0    0.80    0.18
   8   6   0    0.45    0.21
  -8   6   0    0.66    0.21
   9  -6   0   -0.10    0.15
   9   6   0    0.00    0.19
  -9   6   0   -0.02    0.17
 -10   6   0   -0.17    0.18
  10   6   0    0.11    0.20
 -11   6   0   -0.36    0.21
  11   6   0   -0.27    0.19
 -12   6   0    1.74    0.34
  12   6   0    2.30    0.37
 -13   6   0    0.20    0.28
  13   6   0    0.19    0.26
   0  -7   0    0.07    0.13
   0  -7   0    0.17    0.13
   1  -7   0    1.21    0.19
   1  -7   0    0.84    0.17
  -1  -7   0    0.81    0.17
  -1  -7   0    1.12    0.17
  -1   7   0    0.90    0.07
  -1   7   0    0.97    0.07
  -2  -7   0    4.95    0.29
   2  -7   0    4.52    0.30
   2   7   0    5.00    0.18
   2   7   0    5.17    0.19
  -2   7   0    4.60    0.20
  -2   7   0    5.14    0.21
  -3  -7   0    9.98    0.43
   3  -7   0   10.73    0.45
   3   7   0   10.04    0.35
  -3   7   0   10.85    0.37
  -3   7   0   10.38    0.36
   3   7   0   10.19    0.35
   4  -7   0    9.45    0.43
   4  -7   0    9.34    0.30
  -4  -7   0    9.33    0.43
   4   7   0    9.06    0.36
  -4   7   0    9.39    0.39
  -4   7   0    9.81    0.38
   4   7   0    9.66    0.36
   5  -7   0   12.47    0.50
  -5  -7   0   12.81    0.39
  -5  -7   0   11.56    0.51
  -5   7   0   12.27    0.47
   5   7   0   12.68    0.48
   6  -7   0    0.90    0.16
   6  -7   0    1.04    0.18
  -6  -7   0    1.29    0.22
  -6   7   0    0.78    0.18
   6   7   0    0.82    0.19
  -7  -7   0    1.01    0.23
   7  -7   0    1.00    0.18
   7   7   0    1.17    0.23
  -7   7   0    0.58    0.20
   8   7   0    0.56    0.21
  -8   7   0    0.41    0.19
   9   7   0    0.28    0.21
  -9   7   0    0.27    0.21
 -10   7   0    0.22    0.21
  10   7   0    0.01    0.20
 -11   7   0    0.22    0.25
  11   7   0    0.09    0.25
  12   7   0    0.57    0.29
 -12   7   0    0.81    0.30
  13   7   0   -0.02    0.26
 -13   7   0    0.49    0.29
   0  -8   0    9.12    0.46
   0  -8   0    9.68    0.44
  -1  -8   0    0.98    0.18
   1  -8   0    0.64    0.18
   1  -8   0    0.59    0.17
  -1   8   0    0.80    0.07
  -1   8   0    0.59    0.06
  -2  -8   0    3.89    0.29
   2  -8   0    3.73    0.30
   2   8   0    3.71    0.17
  -2   8   0    3.71    0.19
  -2   8   0    3.76    0.18
   2   8   0    3.75    0.16
  -3  -8   0    0.77    0.18
   3  -8   0    0.64    0.18
  -3   8   0    0.86    0.12
   3   8   0    0.69    0.12
  -3   8   0    0.66    0.12
   3   8   0    0.52    0.10
  -4  -8   0    4.78    0.34
   4  -8   0    5.69    0.35
  -4   8   0    5.58    0.30
   4   8   0    5.31    0.27
   4   8   0    5.86    0.28
  -4   8   0    5.92    0.30
   5  -8   0    3.55    0.29
  -5  -8   0    3.68    0.33
   5   8   0    3.56    0.27
  -5   8   0    3.85    0.28
  -6  -8   0    0.34    0.18
   6  -8   0    0.41    0.17
   6   8   0    0.39    0.17
  -6   8   0    0.53    0.17
  -7  -8   0    5.13    0.35
   7   8   0    4.50    0.37
  -7   8   0    4.47    0.34
  -8  -8   0    5.25    0.39
  -8   8   0    5.09    0.39
   8   8   0    4.96    0.38
  -9  -8   0    0.90    0.24
  -9   8   0    1.14    0.24
   9   8   0    0.94    0.25
 -10  -8   0    0.59    0.23
 -10   8   0    0.07    0.20
  10   8   0   -0.04    0.20
  11   8   0    0.76    0.29
 -11   8   0    0.58    0.26
  12   8   0    0.26    0.26
 -12   8   0   -0.23    0.21
   0  -9   0    0.28    0.16
   1  -9   0    2.81    0.31
   1  -9   0    3.17    0.30
  -1  -9   0    3.81    0.31
  -1   9   0    3.50    0.14
  -1   9   0    3.44    0.14
   2  -9   0   20.78    0.78
  -2  -9   0   22.09    0.74
  -2   9   0   21.29    0.59
   2   9   0   20.74    0.57
   2   9   0   21.51    0.56
  -2   9   0   20.56    0.58
  -3  -9   0    7.29    0.41
   3  -9   0    7.84    0.45
   3   9   0    7.60    0.30
   3   9   0    7.29    0.29
  -3   9   0    7.77    0.31
  -3   9   0    7.62    0.31
  -4  -9   0    4.63    0.33
   4  -9   0    3.66    0.34
  -4   9   0    4.62    0.28
   4   9   0    4.84    0.28
  -5  -9   0    1.99    0.26
   5  -9   0    2.07    0.25
  -5   9   0    1.71    0.22
   5   9   0    1.60    0.21
  -6  -9   0    4.79    0.37
   6   9   0    5.46    0.34
  -6   9   0    5.17    0.34
  -7  -9   0    2.68    0.31
  -7   9   0    2.42    0.29
   7   9   0    2.14    0.27
  -8  -9   0    0.08    0.17
  -8   9   0    0.04    0.17
   8   9   0   -0.09    0.17
  -9  -9   0    0.15    0.21
   9   9   0    0.42    0.23
  -9   9   0    0.29    0.21
 -10  -9   0    0.24    0.22
  10   9   0   -0.19    0.21
 -10   9   0   -0.03    0.21
 -11  -9   0   -0.12    0.19
 -11   9   0    0.24    0.24
  11   9   0    0.20    0.24
 -12  -9   0   -0.20    0.21
  12   9   0    0.01    0.26
 -12   9   0    0.30    0.26
   0 -10   0   32.81    1.05
  -1 -10   0    3.36    0.34
   1 -10   0    3.96    0.36
  -1  10   0    4.20    0.17
  -1  10   0    4.06    0.16
  -2 -10   0    2.07    0.28
   2  10   0    1.84    0.14
   2  10   0    1.92    0.15
  -2  10   0    1.87    0.14
  -2  10   0    1.90    0.14
  -3 -10   0    0.53    0.20
  -3  10   0    0.69    0.13
   3  10   0    0.41    0.11
  -4 -10   0    0.22    0.19
  -4  10   0    0.15    0.12
   4  10   0    0.26    0.12
  -5 -10   0   -0.03    0.17
  -5  10   0    0.10    0.13
   5  10   0    0.16    0.13
  -6 -10   0    0.51    0.21
  -6  10   0    0.56    0.18
   6  10   0    0.63    0.18
  -7 -10   0    0.42    0.21
  -7  10   0    0.74    0.20
   7  10   0    0.11    0.17
  -8 -10   0   -0.02    0.19
  -8  10   0   -0.05    0.17
   8  10   0   -0.11    0.18
  -9 -10   0    0.42    0.22
   9  10   0    0.11    0.21
  -9  10   0   -0.08    0.20
 -10 -10   0    0.61    0.25
  10  10   0    0.34    0.24
 -10  10   0    0.57    0.25
 -11 -10   0   -0.07    0.22
  11  10   0   -0.18    0.23
 -11  10   0    0.28    0.24
   0 -11   0    0.00    0.19
  -1 -11   0    0.84    0.22
   1 -11   0    0.57    0.21
  -2 -11   0    0.40    0.21
  -2  11   0    0.44    0.10
   2  11   0    0.52    0.09
  -3 -11   0    0.49    0.19
  -3  11   0    0.24    0.11
   3  11   0    0.28    0.10
  -4 -11   0   -0.12    0.18
  -4  11   0   -0.10    0.11
   4  11   0    0.08    0.12
  -5 -11   0    0.37    0.21
   5  11   0    0.38    0.15
  -5  11   0    0.53    0.16
  -6 -11   0    0.00    0.19
   6  11   0    0.18    0.15
  -6  11   0    0.16    0.16
  -7 -11   0    0.48    0.23
   7  11   0    0.67    0.20
  -7  11   0    0.76    0.21
  -8 -11   0    1.48    0.29
  -8  11   0    1.58    0.28
   8  11   0    1.85    0.28
  -9 -11   0    0.64    0.25
   9  11   0    0.72    0.24
  -9  11   0    0.69    0.25
 -10 -11   0    0.18    0.22
 -10  11   0   -0.12    0.21
  10  11   0   -0.02    0.24
   0 -12   0    3.94    0.38
   1 -12   0    0.58    0.24
  -1 -12   0    0.10    0.19
  -2 -12   0    1.49    0.27
  -2  12   0    1.99    0.16
  -3 -12   0    0.19    0.21
   3  12   0    0.05    0.09
  -3  12   0   -0.08    0.10
  -4 -12   0   -0.07    0.18
  -4  12   0    0.55    0.14
   4  12   0    0.24    0.13
  -5 -12   0    0.25    0.21
   5  12   0   -0.11    0.13
  -5  12   0    0.09    0.15
  -6 -12   0    0.39    0.22
   6  12   0    0.15    0.16
  -6  12   0    0.13    0.17
  -7 -12   0    0.25    0.22
  -7  12   0   -0.25    0.16
   7  12   0    0.18    0.19
  -8 -12   0    0.31    0.24
   8  12   0    0.57    0.22
  -8  12   0    0.32    0.22
  -9 -12   0    0.09    0.23
   9  12   0    0.15    0.22
  -9  12   0    0.24    0.22
   0 -13   0    0.24    0.21
  -1 -13   0   -0.03    0.22
  -2 -13   0    0.28    0.23
  -2  13   0    0.39    0.10
  -3 -13   0    0.41    0.23
  -3  13   0    0.25    0.12
   3  13   0    0.17    0.10
  -4 -13   0    0.23    0.22
   4  13   0    0.59    0.14
  -4  13   0    0.16    0.14
  -5 -13   0    0.04    0.19
  -5  13   0   -0.15    0.14
   5  13   0    0.02    0.14
  -6 -13   0    0.46    0.25
   6  13   0    0.23    0.16
  -6  13   0    0.37    0.19
  -7 -13   0   -0.16    0.22
  -7  13   0    0.01    0.20
   7  13   0    0.02    0.18
  -8 -13   0    0.04    0.22
   8  13   0    0.35    0.21
  -8  13   0   -0.09    0.19
   0 -14   0    0.07    0.22
  -1 -14   0    3.05    0.39
  -2 -14   0    0.85    0.28
  -2  14   0    0.70    0.11
  -3 -14   0    0.20    0.24
  -3  14   0    0.25    0.12
  -4 -14   0   -0.11    0.19
   4  14   0    0.07    0.12
  -4  14   0    0.17    0.14
  -5 -14   0    0.70    0.27
  -5  14   0    0.64    0.19
   5  14   0    0.60    0.17
  -6 -14   0   -0.04    0.22
  -6  14   0    0.23    0.19
   6  14   0    0.13    0.17
  -7 -14   0   -0.09    0.22
   7  14   0    0.19    0.19
  -7  14   0    0.27    0.21
   0 -15   0    0.20    0.26
  -1 -15   0    0.35    0.26
  -2 -15   0   -0.06    0.25
  -3 -15   0   -0.12    0.23
  -4 -15   0    0.03    0.24
  -4  15   0    0.04    0.14
  -5 -15   0   -0.17    0.22
  -5  15   0   -0.16    0.16
  -1 -16   0    0.16    0.24
  -2 -16   0    0.06    0.26
  -3 -16   0    0.28    0.27
 -14   0   1   -0.15    0.20
  14   0  -1    0.54    0.30
 -13   0   1    0.37    0.24
  13   0  -1   -0.07    0.23
 -12   0   1    0.35    0.23
  12   0  -1   -0.19    0.22
 -11   0   1    0.22    0.22
  11   0  -1    0.25    0.22
  10   0  -1    0.03    0.18
 -10   0   1    0.25    0.19
   9   0  -1    6.26    0.45
  -9   0   1    7.20    0.46
  -8   0   1   -0.16    0.15
   8   0  -1   -0.25    0.16
   7   0  -1   19.02    0.69
  -7   0   1   19.00    0.68
  -6   0   1   -0.09    0.11
   6   0  -1   -0.11    0.11
  -5   0   1   38.55    1.06
   5   0  -1   37.36    1.05
   4   0  -1    0.00    0.11
  -4   0   1    0.07    0.10
   3   0  -1   77.46    1.90
  -3   0   1   76.22    1.89
   2   0  -1   -0.01    0.06
  -2   0   1   -0.11    0.05
  -2   0   1   -0.03    0.05
   2   0  -1   -0.03    0.05
   1   0  -1   -1.49    0.02
   1   0  -1   -1.49    0.02
  -1   0   1   -1.47    0.02
  -1   0   1   -1.46    0.02
   0   0   1    0.00    0.00
   0   0  -1    0.00    0.00
   0   0   1    0.00    0.00
   0   0  -1    0.00    0.00
  -1   0  -1   -0.22    0.02
   1   0   1   -0.19    0.02
   1   0   1   -0.18    0.02
  -1   0  -1   -0.19    0.02
   2   0   1   -0.10    0.05
   2   0   1    0.01    0.05
  -2   0  -1   -0.04    0.05
   3   0   1    0.05    0.09
  -3   0  -1    0.32    0.09
   4   0   1   -0.12    0.09
  -4   0  -1   -0.05    0.09
   5   0   1    0.53    0.14
  -5   0  -1    0.64    0.13
   6   0   1   -0.15    0.12
  -6   0  -1   -0.09    0.11
   7   0   1    2.37    0.25
  -7   0  -1    2.25    0.24
   8   0   1    0.07    0.06
  -8   0  -1   -0.08    0.13
   8   0   1   -0.18    0.14
  -9   0  -1    9.35    0.49
   9   0   1    9.20    0.53
 -10   0  -1   -0.32    0.15
  10   0   1   -0.07    0.18
 -11   0  -1    7.34    0.52
  11   0   1    7.08    0.50
  12   0   1    0.21    0.25
 -12   0  -1   -0.54    0.14
 -13   0  -1    0.49    0.26
  13   0   1    0.54    0.27
 -14   0  -1   -0.07    0.27
  14   0   1   -0.34    0.25
 -14  -1   1    0.70    0.28
  14  -1  -1    0.44    0.28
 -14   1   1    1.09    0.31
  14   1  -1    0.92    0.34
  13  -1  -1    0.54    0.30
 -13  -1   1    1.28    0.30
 -13   1   1    0.86    0.29
  13   1  -1    0.54    0.29
 -12  -1   1    1.43    0.30
  12  -1  -1    1.53    0.32
 -12   1   1    1.60    0.31
  12   1  -1    0.86    0.30
 -11  -1   1    0.50    0.22
  11  -1  -1    0.96    0.27
 -11   1   1    0.74    0.24
  11   1  -1    0.70    0.27
 -10  -1   1    5.77    0.44
  10  -1  -1    5.75    0.43
  10   1  -1    5.47    0.47
 -10   1   1    4.90    0.40
  -9  -1   1   -0.12    0.17
   9  -1  -1    0.00    0.18
  -9   1   1    0.02    0.18
   9   1  -1   -0.20    0.17
   8  -1  -1    1.48    0.25
  -8  -1   1    1.34    0.22
  -8   1   1    1.27    0.22
   8   1  -1    1.25    0.25
   7  -1  -1    4.01    0.30
  -7  -1   1    3.81    0.31
   7   1  -1    3.94    0.16
  -7   1   1    4.50    0.30
   7   1  -1    4.65    0.31
   6  -1  -1    1.04    0.18
  -6  -1   1    1.15    0.18
   6   1  -1    1.12    0.19
   6   1  -1    1.32    0.09
  -6   1   1    1.09    0.17
   5  -1  -1    1.26    0.17
  -5  -1   1    1.28    0.16
   5   1  -1    1.51    0.17
   5   1  -1    1.30    0.11
  -5   1   1    1.27    0.16
   4  -1  -1    0.19    0.11
  -4  -1   1   -0.02    0.10
   4   1  -1   -0.02    0.09
  -4   1   1    0.18    0.10
   4   1  -1    0.05    0.06
   3  -1  -1   63.86    1.61
  -3  -1   1   65.43    1.61
   3   1  -1   65.25    1.59
  -3   1   1   64.72    1.61
   3   1  -1   64.64    1.61
   2  -1  -1  178.68    4.10
  -2  -1   1  176.02    4.18
  -2  -1   1  178.17    4.10
   2   1  -1  173.28    4.10
   2   1  -1  165.24    4.10
  -2   1   1  180.37    4.11
  -2   1   1  168.76    4.10
  -2   1   1  175.21    4.17
   2   1  -1  163.66    4.18
  -1  -1   1    0.05    0.03
  -1  -1   1    0.01    0.03
   1  -1  -1   -0.04    0.03
  -1  -1   1   -0.03    0.03
   1  -1  -1   -0.08    0.03
   1   1  -1   -0.01    0.03
  -1   1   1   -0.03    0.02
   1   1  -1   -0.02    0.03
  -1   1   1   -0.05    0.02
   1   1  -1   -0.04    0.02
   0  -1   1   -0.01    0.02
   0  -1  -1    0.01    0.02
   0  -1   1   -0.02    0.01
   0  -1   1   -0.01    0.00
   0  -1   1   -0.01    0.02
   0  -1  -1   -0.03    0.02
   0  -1  -1   -0.02    0.01
   0   1  -1    0.01    0.02
   0   1   1   -0.01    0.01
   0   1  -1    0.00    0.02
   0   1  -1   -0.02    0.01
   0   1   1   -0.01    0.01
   0   1   1   -0.01    0.01
   0   1  -1    0.00    0.01
  -1  -1  -1   -0.02    0.03
   1  -1   1    0.02    0.03
   1  -1   1    0.03    0.03
  -1  -1  -1    0.00    0.03
  -1   1  -1    0.01    0.03
   1   1   1    0.02    0.03
   1   1   1   -0.02    0.02
  -1   1  -1    0.02    0.03
  -2  -1  -1    8.76    0.27
   2  -1   1    8.81    0.27
   2   1   1    8.23    0.27
  -2   1  -1    8.44    0.27
   2   1   1    8.15    0.27
  -2   1  -1    8.57    0.27
  -3  -1  -1    0.25    0.10
   3  -1   1    0.24    0.09
   3   1   1    0.14    0.09
  -3   1  -1    0.34    0.09
   4  -1   1   11.60    0.42
  -4  -1  -1   11.20    0.39
  -4   1  -1   11.14    0.40
   4   1   1   11.58    0.42
   5  -1   1    2.41    0.22
  -5  -1  -1    2.66    0.21
   5   1   1    2.27    0.20
  -5   1  -1    2.17    0.20
   6  -1   1   22.92    0.73
  -6  -1  -1   22.38    0.71
   6   1   1   21.81    0.72
  -6   1  -1   23.18    0.74
  -7  -1  -1    0.14    0.13
   7  -1   1    0.17    0.15
   7   1   1    0.14    0.07
  -7   1  -1    0.21    0.15
   7   1   1   -0.01    0.13
   8  -1   1    0.23    0.19
  -8  -1  -1    0.42    0.18
   8   1   1    0.32    0.20
   8   1   1    0.47    0.09
  -8   1  -1    0.76    0.19
  -9  -1  -1    1.24    0.23
   9  -1   1    1.60    0.27
   9   1   1    1.56    0.27
  -9   1  -1    1.58    0.25
  10  -1   1    2.41    0.34
 -10  -1  -1    2.64    0.33
 -10   1  -1    2.10    0.30
  10   1   1    1.79    0.30
 -11  -1  -1    0.72    0.24
  11  -1   1    0.84    0.27
  11   1   1    0.80    0.26
 -11   1  -1    0.74    0.24
 -12  -1  -1    2.88    0.37
  12  -1   1    2.53    0.37
  12   1   1    2.62    0.40
 -12   1  -1    1.75    0.32
  13  -1   1    0.19    0.26
 -13  -1  -1    0.28    0.26
  13   1   1    0.51    0.30
 -13   1  -1    0.26    0.27
  14  -1   1    0.96    0.33
 -14  -1  -1    0.96    0.30
 -14   1  -1    0.71    0.32
  14   1   1    0.80    0.31
  14  -2  -1   -0.27    0.25
 -14  -2   1   -0.12    0.23
  14   2  -1    0.27    0.30
 -14   2   1   -0.06    0.24
 -13  -2   1    0.57    0.26
  13  -2  -1    0.49    0.26
 -13   2   1    0.57    0.27
  13   2  -1    0.72    0.30
 -12  -2   1    0.40    0.22
  12  -2  -1   -0.17    0.22
  12   2  -1    0.15    0.24
 -12   2   1    0.01    0.21
  11  -2  -1    1.64    0.31
 -11  -2   1    1.32    0.28
  11   2  -1    1.06    0.28
 -11   2   1    1.63    0.30
 -10  -2   1    3.15    0.34
  10  -2  -1    2.88    0.35
 -10   2   1    3.02    0.34
  10   2  -1    3.83    0.39
  -9  -2   1   15.34    0.64
   9  -2  -1   15.68    0.68
   9   2  -1   14.86    0.66
  -9   2   1   15.66    0.66
   8  -2  -1    1.24    0.22
  -8  -2   1    1.00    0.20
  -8   2   1    1.45    0.24
   8   2  -1    1.01    0.22
   8   2  -1    1.36    0.12
  -7  -2   1   -0.03    0.13
   7  -2  -1   -0.11    0.14
   7   2  -1    0.09    0.14
   7   2  -1    0.11    0.08
  -7   2   1   -0.14    0.12
  -6  -2   1    9.50    0.42
   6  -2  -1    9.87    0.42
  -6   2   1   10.11    0.44
   6   2  -1    9.74    0.42
   6   2  -1   10.24    0.34
  -5  -2   1    6.72    0.30
   5  -2  -1    6.43    0.30
   5   2  -1    5.92    0.32
  -5   2   1    6.37    0.31
   5   2  -1    6.26    0.24
   4  -2  -1   75.38    1.92
   4  -2  -1   78.02    1.87
  -4  -2   1   77.79    1.92
  -4   2   1   75.28    1.92
   4   2  -1   77.10    1.90
   4   2  -1   76.50    1.92
  -3  -2   1   14.83    0.45
  -3  -2   1   15.04    0.44
   3  -2  -1   15.11    0.41
   3  -2  -1   15.64    0.46
  -3   2   1   14.65    0.45
   3   2  -1   15.11    0.46
   3   2  -1   14.80    0.44
  -3   2   1   14.61    0.41
   2  -2  -1  140.13    3.38
  -2  -2   1  142.24    3.32
  -2  -2   1  140.49    3.40
   2  -2  -1  141.15    3.33
  -2   2   1  139.09    3.38
   2   2  -1  141.78    3.40
   2   2  -1  140.54    3.32
  -2   2   1  138.25    3.33
   2   2  -1  136.87    3.32
  -2   2   1  138.67    3.33
   1   2  -1  134.59    3.59
  -1   2   1  167.73    3.67
   1   2   1  131.08    3.09
  -1   2  -1  146.46    3.14
  -1   2  -1  112.89    3.06
   2  -2   1   14.22    0.41
  -2  -2  -1   14.01    0.40
   2  -2   1   14.27    0.41
  -2   2  -1   14.72    0.41
   2   2   1   14.23    0.41
   2   2   1   14.47    0.41
  -2   2  -1   14.23    0.41
   3  -2   1    0.32    0.08
  -3  -2  -1    0.24    0.09
   3  -2   1    0.13    0.09
  -3   2  -1    0.20    0.09
   3   2   1    0.20    0.09
  -4  -2  -1    6.62    0.28
   4  -2   1    6.39    0.23
   4  -2   1    5.65    0.27
   4   2   1    5.71    0.29
  -4   2  -1    6.34    0.29
   5  -2   1    2.00    0.13
  -5  -2  -1    2.04    0.18
   5  -2   1    2.19    0.21
   5   2   1    2.14    0.21
  -5   2  -1    2.07    0.20
   6  -2   1    0.78    0.09
  -6  -2  -1    0.82    0.16
   6  -2   1    0.78    0.17
  -6   2  -1    0.47    0.15
   6   2   1    0.78    0.11
   6   2   1    0.47    0.15
   7  -2   1    7.90    0.25
   7  -2   1    7.40    0.39
  -7  -2  -1    7.86    0.40
   7   2   1    7.56    0.30
  -7   2  -1    8.16    0.42
   7   2   1    7.81    0.41
  -8  -2  -1   25.92    0.84
   8  -2   1   23.83    0.62
   8  -2   1   24.42    0.85
   8   2   1   22.96    0.83
   8   2   1   24.56    0.69
  -8   2  -1   24.03    0.84
  -9  -2  -1    9.67    0.52
   9  -2   1    9.66    0.52
  -9   2  -1    9.92    0.52
   9   2   1   10.32    0.55
  10  -2   1    6.19    0.44
 -10  -2  -1    6.41    0.46
 -10   2  -1    6.60    0.44
  10   2   1    5.38    0.43
 -11  -2  -1    0.28    0.22
  11  -2   1    0.78    0.24
  11   2   1    0.25    0.22
 -11   2  -1    0.18    0.21
 -12  -2  -1    1.22    0.30
  12  -2   1    1.38    0.30
  12   2   1    0.59    0.29
 -12   2  -1    0.54    0.25
  13  -2   1    0.12    0.23
 -13  -2  -1    0.72    0.27
 -13   2  -1    0.51    0.26
  13   2   1    0.18    0.26
 -14  -2  -1   -0.18    0.24
  14  -2   1    0.13    0.28
 -14   2  -1    0.32    0.30
  14   2   1   -0.03    0.25
  14  -3  -1    0.76    0.32
  14   3  -1    0.70    0.31
 -14   3   1    0.49    0.29
 -13  -3   1    2.08    0.34
  13  -3  -1    1.41    0.33
  13   3  -1    1.73    0.37
 -13   3   1    1.56    0.34
 -12  -3   1    0.11    0.19
  12  -3  -1    0.54    0.26
 -12   3   1    0.61    0.27
  12   3  -1    0.21    0.26
  11  -3  -1    0.78    0.26
 -11  -3   1    0.43    0.20
  11   3  -1    0.43    0.24
 -11   3   1    0.87    0.26
 -10  -3   1    0.31    0.19
  10  -3  -1    0.25    0.19
  10   3  -1    0.12    0.20
 -10   3   1    0.34    0.22
   9  -3  -1    0.59    0.21
  -9  -3   1    1.05    0.23
  -9   3   1    1.23    0.25
   9   3  -1    0.74    0.24
  -8  -3   1   -0.29    0.11
   8  -3  -1   -0.34    0.15
   8   3  -1    0.08    0.09
   8   3  -1    0.30    0.19
  -8   3   1   -0.05    0.16
   7  -3  -1    3.66    0.30
  -7  -3   1    3.55    0.29
  -7   3   1    3.61    0.29
   7   3  -1    3.37    0.30
   7   3  -1    3.21    0.22
  -6  -3   1    0.45    0.14
   6  -3  -1    0.07    0.13
   6   3  -1    0.27    0.14
  -6   3   1    0.12    0.12
   6   3  -1    0.30    0.10
  -5  -3   1   16.30    0.54
   5  -3  -1   16.99    0.55
   5   3  -1   16.26    0.55
   5   3  -1   16.60    0.52
  -5   3   1   16.15    0.55
  -4  -3   1    0.61    0.11
   4  -3  -1    0.82    0.13
   4  -3  -1    0.75    0.09
  -4   3   1    0.82    0.10
   4   3  -1    0.59    0.11
  -4   3   1    0.56    0.11
   4   3  -1    0.72    0.12
   3  -3  -1   33.65    0.89
  -3  -3   1   34.76    0.92
   3  -3  -1   33.11    0.89
  -3  -3   1   34.46    0.88
  -3   3   1   33.49    0.89
   3   3  -1   32.45    0.88
  -3   3   1   34.20    0.89
  -3   3   1   34.62    0.90
   3   3  -1   33.78    0.88
   3   3  -1   33.09    0.91
  -2  -3   1   65.74    1.67
   2  -3  -1   65.58    1.65
  -2  -3   1   64.00    1.62
   2  -3  -1   64.92    1.59
   2   3  -1   66.32    1.60
   2   3  -1   67.21    1.60
  -2   3   1   65.16    1.65
  -2   3   1   67.96    1.61
  -2   3   1   65.62    1.61
   2   3  -1   66.23    1.67
   1  -3  -1  475.56   11.07
  -1  -3   1  472.57   11.29
  -1  -3   1  471.85   11.24
   1  -3  -1  465.09   11.41
   1  -3  -1  460.19   11.06
   1   3  -1  472.34   11.10
   1   3  -1  471.79   11.11
  -1   3   1  476.67   11.18
   1   3  -1  475.18   11.55
  -1   3   1  467.75   11.34
  -1   3   1  476.47   11.18
   0  -3  -1   30.54    0.79
   0  -3   1   30.97    0.83
   0  -3   1   30.84    0.81
   0   3  -1   30.29    0.83
   0   3   1   31.11    0.83
   1  -3   1   77.85    1.95
  -1  -3  -1   78.20    1.88
   1  -3   1   78.61    1.84
   1  -3   1   78.08    1.91
   1   3   1   78.60    1.86
  -1   3  -1   79.00    1.95
   1   3   1   77.85    1.86
  -1   3  -1   77.80    1.86
  -1   3  -1   78.41    1.86
   1   3   1   78.44    1.96
  -2  -3  -1  124.53    2.98
   2  -3   1  126.06    2.98
   2  -3   1  126.86    3.07
   2   3   1  125.36    2.99
  -2   3  -1  126.14    3.07
   2   3   1  125.33    2.98
  -2   3  -1  125.78    2.99
   2   3   1  122.30    3.08
  -2   3  -1  124.52    2.99
  -3  -3  -1    0.74    0.11
   3  -3   1    0.75    0.10
   3  -3   1    0.82    0.12
   3   3   1    0.91    0.11
  -3   3  -1    1.08    0.12
   3   3   1    0.91    0.12
   3   3   1    0.80    0.12
  -3   3  -1    0.74    0.11
   4  -3   1   79.21    1.98
  -4  -3  -1   79.31    1.97
   4  -3   1   80.00    1.98
   4   3   1   77.96    2.00
   4   3   1   80.72    1.99
  -4   3  -1   78.87    1.99
  -5  -3  -1    2.87    0.22
   5  -3   1    2.55    0.22
   5  -3   1    2.57    0.17
  -5   3  -1    2.86    0.23
   5   3   1    2.44    0.21
   5   3   1    2.93    0.20
   6  -3   1   11.74    0.48
   6  -3   1   12.57    0.39
  -6  -3  -1   12.69    0.48
   6   3   1   12.96    0.51
  -6   3  -1   12.45    0.49
   6   3   1   12.56    0.44
   7  -3   1    2.50    0.16
   7  -3   1    2.67    0.27
  -7  -3  -1    2.17    0.24
   7   3   1    2.67    0.20
   7   3   1    2.51    0.26
  -7   3  -1    2.26    0.25
  -8  -3  -1    2.21    0.27
   8  -3   1    2.06    0.14
   8  -3   1    2.01    0.26
   8   3   1    2.18    0.19
   8   3   1    2.70    0.31
  -8   3  -1    1.98    0.26
   9  -3   1    0.67    0.22
  -9  -3  -1    0.85    0.22
  -9   3  -1    0.70    0.22
   9   3   1    1.36    0.28
  10  -3   1    2.14    0.31
 -10  -3  -1    2.40    0.31
 -10   3  -1    2.33    0.32
  10   3   1    1.90    0.31
 -11  -3  -1    0.36    0.21
  11  -3   1    0.03    0.20
  11   3   1    0.09    0.23
 -11   3  -1    0.01    0.21
 -12  -3  -1    1.04    0.25
  12  -3   1    0.31    0.25
  12   3   1    0.53    0.29
 -12   3  -1    0.25    0.25
  13  -3   1    3.08    0.42
 -13  -3  -1    2.69    0.37
  13   3   1    2.44    0.42
 -13   3  -1    2.56    0.41
  14  -3   1    0.46    0.31
  14   3   1    0.54    0.30
 -14   3  -1   -0.14    0.26
 -14   4   1   -0.12    0.25
  14   4  -1   -0.09    0.25
  13  -4  -1   -0.20    0.23
  13   4  -1    0.11    0.26
 -13   4   1    0.10    0.25
  12  -4  -1    5.49    0.49
 -12   4   1    4.07    0.45
  12   4  -1    3.63    0.44
  11  -4  -1    4.57    0.42
 -11  -4   1    4.78    0.38
 -11   4   1    4.31    0.45
  11   4  -1    4.45    0.45
  10  -4  -1    1.08    0.25
 -10  -4   1    0.89    0.22
  10   4  -1    0.79    0.26
 -10   4   1    1.07    0.26
   9  -4  -1    1.33    0.26
  -9  -4   1    1.37    0.23
  -9   4   1    1.51    0.27
   9   4  -1    1.50    0.27
   8  -4  -1   23.38    0.82
  -8  -4   1   23.20    0.79
  -8   4   1   23.15    0.84
   8   4  -1   23.60    0.73
   8   4  -1   24.04    0.84
   7  -4  -1    0.24    0.17
  -7  -4   1    0.32    0.15
   7   4  -1   -0.18    0.16
  -7   4   1    0.27    0.17
   7   4  -1    0.17    0.12
   6  -4  -1    0.88    0.17
  -6  -4   1    0.61    0.14
  -6   4   1    0.73    0.15
   6   4  -1    0.57    0.13
   6   4  -1    0.41    0.15
   5  -4  -1    1.41    0.14
   5  -4  -1    1.54    0.17
  -5  -4   1    2.02    0.18
   5   4  -1    1.60    0.19
  -5   4   1    1.98    0.15
  -5   4   1    1.49    0.17
   5   4  -1    1.76    0.17
  -4  -4   1   67.47    1.66
   4  -4  -1   65.97    1.67
   4  -4  -1   66.97    1.69
  -4   4   1   67.68    1.68
   4   4  -1   66.19    1.68
  -4   4   1   64.37    1.68
   4   4  -1   65.31    1.72
  -3  -4   1    7.29    0.31
   3  -4  -1    7.49    0.27
   3  -4  -1    6.96    0.29
  -3  -4   1    7.39    0.31
  -3   4   1    7.45    0.30
   3   4  -1    7.42    0.28
   3   4  -1    7.28    0.28
  -3   4   1    7.43    0.29
   3   4  -1    7.01    0.31
  -3   4   1    7.74    0.29
  -2  -4   1    2.51    0.20
   2  -4  -1    2.51    0.18
  -2  -4   1    2.24    0.10
  -2  -4   1    2.22    0.17
  -2   4   1    2.58    0.15
  -2   4   1    2.13    0.14
   2   4  -1    2.22    0.14
   2   4  -1    2.13    0.18
   2   4  -1    2.29    0.13
  -2   4   1    2.43    0.20
   1  -4  -1    2.01    0.17
  -1  -4   1    2.07    0.18
  -1  -4   1    2.54    0.18
   1  -4  -1    2.24    0.18
   1   4  -1    2.34    0.08
   1   4  -1    2.50    0.09
   1   4  -1    2.72    0.19
  -1   4   1    2.28    0.11
  -1   4   1    2.58    0.18
   1   4  -1    2.40    0.09
  -1   4   1    2.32    0.11
   0  -4   1   20.17    0.62
   0  -4   1   21.20    0.60
   0  -4  -1   20.69    0.58
   0   4   1   19.94    0.60
   0   4  -1   19.47    0.60
   1  -4   1    7.96    0.32
   1  -4   1    7.47    0.30
  -1  -4  -1    7.57    0.28
   1   4   1    7.29    0.30
   1   4   1    7.37    0.22
  -1   4  -1    7.62    0.22
   1   4   1    7.99    0.22
  -1   4  -1    7.80    0.22
  -1   4  -1    7.66    0.30
   2  -4   1   73.68    1.87
  -2  -4  -1   73.28    1.81
  -2  -4  -1   74.63    1.75
   2   4   1   73.86    1.78
  -2   4  -1   73.51    1.78
   2   4   1   72.24    1.78
  -2   4  -1   73.99    1.79
   2   4   1   72.78    1.88
  -2   4  -1   73.76    1.87
  -3  -4  -1   43.12    1.13
   3  -4   1   43.62    1.10
  -3  -4  -1   43.21    1.09
   3  -4   1   42.79    1.15
  -3   4  -1   43.32    1.12
  -3   4  -1   44.05    1.15
   3   4   1   42.99    1.11
   3   4   1   44.01    1.11
   3   4   1   41.87    1.17
  -3   4  -1   43.61    1.12
   4  -4   1    0.15    0.09
  -4  -4  -1    0.10    0.09
   4  -4   1    0.03    0.10
   4   4   1   -0.07    0.09
   4   4   1    0.08    0.10
  -4   4  -1    0.13    0.11
  -5  -4  -1    9.15    0.36
   5  -4   1    8.77    0.33
   5  -4   1    8.49    0.36
   5   4   1    8.87    0.37
  -5   4  -1    8.39    0.38
   5   4   1    9.43    0.39
   6  -4   1   10.01    0.43
  -6  -4  -1   10.31    0.42
   6  -4   1    9.89    0.36
  -6   4  -1    9.81    0.43
   6   4   1    9.68    0.43
   7  -4   1    0.82    0.19
  -7  -4  -1    1.22    0.20
   7  -4   1    1.04    0.13
  -7   4  -1    0.55    0.19
   7   4   1    0.82    0.21
   8  -4   1    7.96    0.30
   8  -4   1    8.06    0.45
  -8  -4  -1    7.14    0.42
  -8   4  -1    7.56    0.43
   8   4   1    7.61    0.47
   9  -4   1    2.96    0.33
  -9  -4  -1    3.10    0.32
  -9   4  -1    2.84    0.33
   9   4   1    3.27    0.36
  10  -4   1    1.10    0.26
 -10  -4  -1    1.14    0.24
 -10   4  -1    1.03    0.24
  10   4   1    1.39    0.29
 -11  -4  -1   -0.12    0.17
  11  -4   1   -0.19    0.20
  11   4   1    0.15    0.22
 -11   4  -1   -0.09    0.21
  12  -4   1    1.35    0.31
 -12   4  -1    1.30    0.31
  12   4   1    0.97    0.30
 -13   4  -1    0.58    0.28
  13   4   1    0.46    0.29
  13   5  -1   -0.11    0.26
 -13   5   1    0.17    0.25
  12   5  -1    0.20    0.25
 -12   5   1   -0.07    0.23
  11  -5  -1    0.39    0.22
 -11   5   1    0.06    0.23
  11   5  -1    0.00    0.21
  10  -5  -1    2.40    0.30
 -10  -5   1    2.01    0.27
 -10   5   1    2.41    0.34
  10   5  -1    1.82    0.32
   9  -5  -1    3.50    0.34
  -9  -5   1    3.95    0.31
   9   5  -1    3.13    0.34
  -9   5   1    3.28    0.35
  -8  -5   1    4.32    0.31
   8  -5  -1    4.69    0.37
  -8   5   1    4.11    0.37
   8   5  -1    4.68    0.38
   7  -5  -1    4.10    0.32
  -7  -5   1    4.14    0.28
  -7   5   1    3.60    0.32
   7   5  -1    3.86    0.33
  -6  -5   1   17.04    0.58
   6  -5  -1   17.86    0.60
   6   5  -1   18.67    0.63
  -6   5   1   16.40    0.61
  -5  -5   1    0.06    0.09
   5  -5  -1   -0.04    0.09
   5  -5  -1    0.02    0.10
  -5   5   1    0.09    0.09
   5   5  -1   -0.05    0.11
  -5   5   1    0.19    0.11
  -4  -5   1   41.95    1.12
  -4  -5   1   39.45    1.04
   4  -5  -1   40.22    1.10
   4  -5  -1   41.51    1.06
  -4   5   1   40.13    1.10
  -4   5   1   40.98    1.09
   4   5  -1   38.82    1.07
   4   5  -1   40.44    1.07
  -3  -5   1    0.05    0.11
   3  -5  -1    0.04    0.03
  -3  -5   1    0.16    0.12
   3  -5  -1    0.13    0.11
  -3  -5   1   -0.04    0.06
   3   5  -1    0.14    0.09
   3   5  -1    0.01    0.07
  -3   5   1    0.14    0.09
  -3   5   1    0.01    0.09
  -3   5   1   -0.06    0.08
   2  -5  -1    1.19    0.16
  -2  -5   1    1.36    0.17
  -2  -5   1    1.30    0.16
  -2   5   1    1.11    0.16
  -2   5   1    1.20    0.11
   2   5  -1    1.22    0.10
  -2   5   1    1.10    0.10
   2   5  -1    1.26    0.10
   1  -5  -1    0.80    0.13
  -1  -5   1    0.83    0.14
   1  -5  -1    1.82    0.18
  -1  -5   1    0.72    0.14
   1   5  -1    1.00    0.14
  -1   5   1    0.93    0.07
  -1   5   1    0.94    0.13
  -1   5   1    1.00    0.08
   0  -5   1    5.65    0.29
   0  -5   1    5.45    0.27
   0  -5  -1    5.63    0.26
   0   5  -1    5.74    0.27
   0   5   1    5.88    0.27
   1  -5   1   11.88    0.43
  -1  -5  -1   12.17    0.41
   1  -5   1   11.79    0.44
  -1   5  -1   11.55    0.43
   1   5   1   12.46    0.44
   1   5   1   11.59    0.31
   1   5   1   11.78    0.31
  -1   5  -1   12.15    0.32
  -1   5  -1   12.21    0.32
  -2  -5  -1  100.73    2.46
   2  -5   1   99.62    2.54
  -2   5  -1   99.22    2.41
   2   5   1  100.28    2.41
  -2   5  -1  100.75    2.54
   2   5   1  102.12    2.41
  -2   5  -1  101.22    2.42
  -3  -5  -1   82.72    2.08
  -3  -5  -1   87.88    2.15
   3  -5   1   87.29    2.21
  -3   5  -1   89.15    2.21
  -3   5  -1   86.63    2.13
   3   5   1   85.75    2.12
  -3   5  -1   86.69    2.13
   3   5   1   87.08    2.12
   4  -5   1   48.15    1.23
   4  -5   1   48.06    1.29
  -4  -5  -1   47.71    1.27
  -4  -5  -1   48.34    1.22
  -4   5  -1   47.60    1.29
  -4   5  -1   47.81    1.26
   4   5   1   47.36    1.26
   4   5   1   47.69    1.25
  -5  -5  -1   -0.09    0.09
   5  -5   1    0.04    0.10
   5  -5   1    0.04    0.10
  -5   5  -1    0.09    0.11
   5   5   1    0.18    0.12
  -6  -5  -1    1.50    0.18
   6  -5   1    1.65    0.20
   6  -5   1    1.60    0.17
  -6   5  -1    1.30    0.21
   6   5   1    1.88    0.22
   7  -5   1    3.65    0.30
  -7  -5  -1    3.27    0.28
   7  -5   1    3.65    0.23
   7   5   1    3.22    0.30
  -7   5  -1    3.71    0.32
   8  -5   1    0.09    0.11
   8  -5   1    0.31    0.18
  -8  -5  -1    0.25    0.15
  -8   5  -1   -0.19    0.16
   8   5   1   -0.07    0.18
   9  -5   1    0.07    0.18
  -9  -5  -1   -0.05    0.14
   9   5   1    0.04    0.20
  -9   5  -1    0.10    0.18
 -10  -5  -1    0.07    0.17
  10  -5   1    0.29    0.21
 -10   5  -1    0.12    0.21
  10   5   1    0.08    0.21
  11  -5   1   -0.08    0.19
 -11   5  -1    0.06    0.23
  11   5   1    0.00    0.22
  12   5   1    1.32    0.32
 -12   5  -1    1.19    0.32
  13   5   1   -0.41    0.25
 -13   5  -1   -0.26    0.23
 -13   6   1    0.90    0.31
  13   6  -1    0.28    0.29
  12   6  -1    2.38    0.39
 -12   6   1    1.38    0.33
 -11   6   1    2.47    0.36
  11   6  -1    2.72    0.39
 -10   6   1    0.73    0.25
  10   6  -1    0.20    0.23
   9  -6  -1    0.31    0.18
   9   6  -1    0.28    0.21
  -9   6   1    0.22    0.19
   8  -6  -1    6.83    0.40
  -8  -6   1    6.71    0.36
  -8   6   1    6.26    0.40
   8   6  -1    7.03    0.43
  -7  -6   1    9.59    0.40
   7  -6  -1    9.15    0.44
  -7   6   1    8.75    0.44
   7   6  -1    8.30    0.47
  -6  -6   1    0.77    0.14
   6  -6  -1    1.01    0.16
   6   6  -1    0.83    0.18
  -6   6   1    0.80    0.17
  -6   6   1    0.82    0.15
   5  -6  -1    3.68    0.24
  -5  -6   1    3.94    0.30
  -5  -6   1    3.66    0.20
  -5   6   1    4.13    0.26
   5   6  -1    3.44    0.26
   4  -6  -1    0.13    0.12
   4  -6  -1    0.12    0.07
  -4  -6   1    0.14    0.07
  -4  -6   1    0.17    0.14
   4   6  -1    0.30    0.11
   4   6  -1    0.42    0.11
  -4   6   1    0.33    0.12
  -3  -6   1   31.98    0.93
  -3  -6   1   32.79    0.97
   3  -6  -1   29.45    0.92
   3  -6  -1   30.78    0.79
  -3   6   1   31.59    0.85
   3   6  -1   32.26    0.84
   3   6  -1   31.71    0.84
  -3   6   1   32.61    0.86
   2  -6  -1   17.81    0.60
  -2  -6   1   16.82    0.58
  -2  -6   1   17.43    0.62
   2   6  -1   17.10    0.46
  -2   6   1   17.57    0.49
  -2   6   1   17.07    0.48
   2   6  -1   17.17    0.47
   1  -6  -1    1.38    0.18
  -1  -6   1    1.27    0.18
   1  -6  -1    1.69    0.18
  -1  -6   1    1.36    0.17
  -1   6   1    1.38    0.09
  -1   6   1    1.24    0.09
   0  -6   1   -0.09    0.10
   0  -6   1   -0.13    0.11
   0  -6  -1   -0.03    0.11
  -1  -6  -1    1.43    0.17
   1  -6   1    1.36    0.17
   1  -6   1    1.46    0.18
  -1   6  -1    1.14    0.08
  -1   6  -1    1.28    0.08
   1   6   1    1.07    0.08
   1   6   1    1.36    0.08
   2  -6   1    4.83    0.31
  -2  -6  -1    4.31    0.26
   2   6   1    4.72    0.20
  -2   6  -1    5.08    0.20
  -2   6  -1    5.18    0.20
   2   6   1    4.89    0.19
   3  -6   1    7.34    0.36
   3  -6   1    6.97    0.22
  -3  -6  -1    7.02    0.32
  -3   6  -1    6.96    0.28
  -3   6  -1    6.55    0.28
   3   6   1    7.07    0.28
   3   6   1    7.11    0.27
   4  -6   1    8.14    0.38
  -4  -6  -1    8.62    0.29
  -4  -6  -1    9.16    0.39
  -4   6  -1    8.51    0.36
   4   6   1    9.39    0.36
  -4   6  -1    8.81    0.36
   4   6   1    8.79    0.34
   5  -6   1    0.15    0.12
  -5  -6  -1    0.19    0.15
   5  -6   1    0.09    0.12
  -5  -6  -1    0.05    0.09
  -5   6  -1    0.10    0.13
   5   6   1    0.13    0.12
   6  -6   1   21.76    0.70
   6  -6   1   22.41    0.71
  -6  -6  -1   22.57    0.69
   6   6   1   22.05    0.74
  -6   6  -1   23.66    0.76
   7  -6   1    9.52    0.44
  -7  -6  -1    9.15    0.41
   7  -6   1   10.65    0.42
   7   6   1    9.60    0.48
  -7   6  -1    8.83    0.47
   8  -6   1    1.99    0.25
   8  -6   1    2.06    0.20
  -8  -6  -1    2.50    0.25
  -8   6  -1    1.38    0.26
   8   6   1    1.92    0.28
   9  -6   1    0.98    0.22
   9   6   1    0.67    0.23
  -9   6  -1    0.58    0.21
 -10   6  -1    0.59    0.23
  10   6   1    0.38    0.22
  11   6   1    0.84    0.28
 -11   6  -1    0.31    0.23
  12   6   1    1.31    0.33
 -12   6  -1    1.29    0.32
 -13   6  -1   -0.39    0.22
  13   6   1   -0.42    0.24
  13   7  -1   -0.08    0.25
 -13   7   1    0.21    0.27
 -12   7   1    0.25    0.25
  12   7  -1    0.57    0.28
  11   7  -1    0.34    0.24
 -11   7   1    0.73    0.27
  10   7  -1    0.75    0.25
 -10   7   1    0.84    0.26
   9   7  -1    1.66    0.28
  -9   7   1    1.30    0.26
   8   7  -1    0.34    0.19
  -8   7   1    0.33    0.19
  -7  -7   1   13.96    0.60
   7  -7  -1   15.29    0.55
   7   7  -1   14.33    0.59
  -7   7   1   14.29    0.59
   6  -7  -1    9.41    0.39
  -6  -7   1    9.64    0.47
  -6   7   1    9.29    0.43
   6   7  -1    8.80    0.42
  -5  -7   1    5.40    0.34
  -5  -7   1    5.75    0.23
   5   7  -1    5.54    0.32
  -5   7   1    6.37    0.32
  -4  -7   1    3.80    0.28
   4  -7  -1    3.81    0.18
   4  -7  -1    4.10    0.29
   4   7  -1    3.91    0.23
  -4   7   1    4.00    0.25
   4   7  -1    3.75    0.23
  -4   7   1    3.70    0.24
   3  -7  -1   27.57    0.86
  -3  -7   1   27.03    0.88
  -3  -7   1   26.25    0.83
   3   7  -1   27.21    0.73
  -3   7   1   27.14    0.76
  -3   7   1   27.36    0.75
   3   7  -1   27.49    0.74
  -2  -7   1    0.32    0.15
  -2  -7   1    0.46    0.15
   2  -7  -1    0.36    0.14
   2   7  -1    0.44    0.08
   2   7  -1    0.33    0.06
  -2   7   1    0.33    0.08
  -2   7   1    0.44    0.08
   1  -7  -1    0.25    0.13
  -1  -7   1    0.19    0.13
  -1  -7   1    0.06    0.12
  -1   7   1    0.01    0.04
  -1   7   1    0.02    0.04
   0  -7  -1    0.35    0.14
   0  -7   1    0.05    0.12
   0  -7   1    0.33    0.15
   1  -7   1   -0.01    0.13
   1  -7   1    0.10    0.13
  -1  -7  -1   -0.05    0.11
   1   7   1    0.15    0.04
  -1   7  -1    0.03    0.04
  -1   7  -1    0.10    0.04
   1   7   1    0.02    0.04
  -2  -7  -1    7.67    0.36
   2  -7   1    8.82    0.41
   2  -7   1    8.65    0.40
   2   7   1    9.07    0.28
  -2   7  -1    8.56    0.29
  -2   7  -1    8.62    0.29
   2   7   1    8.23    0.28
   3  -7   1    3.88    0.28
  -3  -7  -1    3.58    0.26
   3   7   1    3.28    0.20
   3   7   1    3.50    0.19
  -3   7  -1    3.37    0.21
  -3   7  -1    3.10    0.20
  -4  -7  -1    8.12    0.40
   4  -7   1    8.38    0.28
   4  -7   1    8.40    0.40
   4   7   1    8.73    0.35
  -4   7  -1    8.43    0.36
  -4   7  -1    8.04    0.35
   4   7   1    8.28    0.33
   5  -7   1    3.14    0.27
  -5  -7  -1    3.12    0.28
  -5  -7  -1    3.04    0.17
   5   7   1    2.90    0.25
  -5   7  -1    3.06    0.25
  -6  -7  -1    1.99    0.26
   6  -7   1    2.27    0.21
   6  -7   1    2.38    0.24
  -6  -7  -1    2.02    0.17
   6   7   1    2.67    0.27
  -6   7  -1    2.24    0.25
   7  -7   1    3.77    0.29
   7  -7   1    4.30    0.31
  -7  -7  -1    3.51    0.32
   7   7   1    3.75    0.33
  -7   7  -1    3.41    0.32
   8  -7   1    0.25    0.14
   8   7   1    0.19    0.18
  -8   7  -1    0.00    0.17
   9   7   1    1.01    0.25
  -9   7  -1    0.96    0.24
  10   7   1   -0.14    0.20
 -10   7  -1   -0.09    0.18
  11   7   1    0.89    0.28
 -11   7  -1    1.59    0.31
 -12   7  -1   -0.05    0.24
  12   7   1    0.86    0.30
 -13   7  -1    0.19    0.27
  13   7   1    0.56    0.30
  12   8  -1    0.23    0.26
 -12   8   1    0.13    0.24
  11   8  -1    1.91    0.34
 -11   8   1    2.40    0.36
 -10  -8   1    0.04    0.21
  10   8  -1   -0.10    0.20
 -10   8   1    0.21    0.22
  -9  -8   1    1.37    0.27
  -9   8   1    1.56    0.28
   9   8  -1    1.34    0.28
  -8  -8   1    4.37    0.39
   8   8  -1    4.97    0.38
  -8   8   1    4.36    0.38
  -7  -8   1    0.09    0.17
  -7   8   1    0.32    0.17
   7   8  -1    0.34    0.18
  -6  -8   1    0.37    0.18
  -6   8   1   -0.03    0.14
   6   8  -1    0.37    0.17
  -5  -8   1    0.69    0.21
  -5   8   1    0.77    0.17
   5   8  -1    0.98    0.18
  -4  -8   1    3.90    0.32
  -4   8   1    3.39    0.25
   4   8  -1    3.23    0.22
  -4   8   1    3.46    0.23
   4   8  -1    3.22    0.23
  -3  -8   1    6.48    0.37
   3   8  -1    5.85    0.26
   3   8  -1    5.99    0.25
  -3   8   1    5.83    0.27
  -3   8   1    5.78    0.26
  -2  -8   1    5.45    0.33
  -2  -8   1    6.80    0.40
  -2   8   1    5.96    0.23
   2   8  -1    6.08    0.21
   2   8  -1    6.14    0.22
  -2   8   1    6.10    0.24
  -1  -8   1    7.93    0.39
   1  -8  -1    7.67    0.39
  -1  -8   1    7.96    0.42
  -1   8   1    7.96    0.24
  -1   8   1    7.96    0.24
   0  -8  -1    2.47    0.25
   0  -8   1    2.23    0.26
   0  -8   1    2.28    0.25
  -1  -8  -1    8.44    0.40
   1  -8   1    8.69    0.42
   1  -8   1    8.84    0.45
  -1   8  -1    8.72    0.25
  -1   8  -1    8.84    0.25
  -2  -8  -1    0.95    0.18
   2  -8   1    0.98    0.20
   2  -8   1    1.00    0.20
   2   8   1    0.99    0.10
   2   8   1    1.27    0.10
  -2   8  -1    1.02    0.11
  -2   8  -1    1.04    0.11
  -3  -8  -1    2.94    0.27
   3  -8   1    2.85    0.29
   3   8   1    3.37    0.20
   3   8   1    2.72    0.19
  -3   8  -1    2.62    0.20
  -3   8  -1    2.88    0.20
  -4  -8  -1    0.55    0.18
   4  -8   1    0.37    0.16
   4   8   1    0.27    0.11
  -4   8  -1    0.32    0.12
  -4   8  -1    0.16    0.12
   4   8   1    0.42    0.13
  -5  -8  -1    3.62    0.32
   5  -8   1    3.92    0.33
  -5   8  -1    3.96    0.29
   5   8   1    3.73    0.28
   6  -8   1    0.99    0.20
  -6  -8  -1    0.71    0.21
  -6   8  -1    0.96    0.19
   6   8   1    0.73    0.19
  -7  -8  -1    1.34    0.24
   7  -8   1    1.44    0.23
  -7   8  -1    1.46    0.24
   7   8   1    1.30    0.23
  -8  -8  -1    0.53    0.20
   8  -8   1    0.12    0.15
  -8   8  -1    0.17    0.18
   8   8   1    0.07    0.19
  -9  -8  -1    0.84    0.23
  -9   8  -1    1.10    0.25
   9   8   1    0.36    0.22
 -10  -8  -1    0.04    0.18
 -10   8  -1   -0.03    0.20
  10   8   1   -0.24    0.19
  11   8   1   -0.20    0.22
 -11   8  -1    0.48    0.26
  12   8   1    0.00    0.25
 -12   8  -1   -0.32    0.23
 -12  -9   1    0.34    0.25
  12   9  -1   -0.19    0.24
 -12   9   1    0.42    0.27
 -11  -9   1    0.62    0.27
  11   9  -1    0.47    0.27
 -11   9   1    0.63    0.27
 -10  -9   1    1.74    0.32
 -10   9   1    1.59    0.31
  10   9  -1    2.01    0.32
  -9  -9   1    0.11    0.21
  -9   9   1   -0.15    0.19
   9   9  -1   -0.37    0.17
  -8  -9   1    0.14    0.19
  -8   9   1   -0.02    0.17
   8   9  -1   -0.07    0.17
  -7  -9   1    0.17    0.19
   7   9  -1    0.20    0.18
  -7   9   1   -0.01    0.15
  -6  -9   1   -0.08    0.18
   6   9  -1   -0.07    0.15
  -6   9   1    0.15    0.15
  -5  -9   1   11.20    0.53
   5   9  -1   11.14    0.46
  -5   9   1   10.92    0.47
  -4  -9   1    1.60    0.24
  -4   9   1    1.31    0.17
   4   9  -1    1.79    0.18
  -3  -9   1    5.51    0.35
  -3   9   1    5.35    0.27
   3   9  -1    5.11    0.24
   3   9  -1    4.80    0.23
  -3   9   1    5.13    0.26
  -2  -9   1   -0.16    0.14
  -2  -9   1   -0.11    0.15
  -2   9   1    0.07    0.08
   2   9  -1    0.05    0.06
   2   9  -1   -0.03    0.07
  -2   9   1    0.00    0.08
  -1  -9   1    1.03    0.22
  -1  -9   1    0.52    0.20
   1  -9  -1    0.53    0.18
  -1   9   1    0.82    0.08
  -1   9   1    0.82    0.08
   0  -9   1    1.66    0.25
   0  -9   1    1.90    0.25
   0  -9  -1    1.69    0.24
   1  -9   1    6.10    0.37
  -1  -9  -1    5.82    0.36
   1  -9   1    5.51    0.40
  -1   9  -1    5.37    0.19
  -1   9  -1    5.37    0.19
   2  -9   1    0.00    0.17
  -2  -9  -1    0.13    0.15
  -2   9  -1   -0.10    0.08
   2   9   1   -0.03    0.07
  -2   9  -1   -0.06    0.07
   2   9   1   -0.10    0.07
  -3  -9  -1    0.29    0.16
   3  -9   1    0.22    0.18
   3   9   1    0.14    0.09
   3   9   1    0.15    0.10
  -3   9  -1    0.20    0.10
  -3   9  -1    0.28    0.11
  -4  -9  -1    0.61    0.19
   4  -9   1    0.51    0.19
   4   9   1    0.55    0.14
  -4   9  -1    0.36    0.14
   5  -9   1    0.85    0.21
  -5  -9  -1    0.57    0.19
   5   9   1    0.37    0.16
  -5   9  -1    0.74    0.17
   6  -9   1    1.39    0.23
  -6  -9  -1    1.40    0.24
  -6   9  -1    1.49    0.22
   6   9   1    1.18    0.20
  -7  -9  -1    0.20    0.17
   7  -9   1    0.03    0.15
   7   9   1   -0.09    0.16
  -7   9  -1    0.15    0.18
  -8  -9  -1    0.19    0.19
  -8   9  -1   -0.15    0.17
   8   9   1    0.38    0.21
  -9  -9  -1    0.84    0.25
  -9   9  -1    1.49    0.29
   9   9   1    1.00    0.26
 -10  -9  -1    0.06    0.19
  10   9   1   -0.05    0.21
 -10   9  -1    0.22    0.22
 -11  -9  -1    0.20    0.22
  11   9   1   -0.08    0.23
 -11   9  -1   -0.08    0.23
 -12  -9  -1   -0.17    0.21
 -12   9  -1    0.22    0.26
  12   9   1    0.09    0.26
 -11 -10   1   -0.15    0.22
  11  10  -1    0.46    0.27
 -11  10   1    0.43    0.25
 -10 -10   1    0.16    0.21
  10  10  -1   -0.10    0.21
 -10  10   1   -0.10    0.21
  -9 -10   1    0.09    0.21
   9  10  -1    0.12    0.21
  -9  10   1   -0.01    0.20
  -8 -10   1    0.23    0.21
   8  10  -1   -0.13    0.18
  -8  10   1    0.38    0.21
  -7 -10   1    0.20    0.20
   7  10  -1    0.01    0.17
  -7  10   1    0.18    0.17
  -6 -10   1    0.48    0.21
   6  10  -1    0.48    0.17
  -6  10   1    0.01    0.15
  -5 -10   1    0.87    0.24
  -5  10   1    0.87    0.18
   5  10  -1    1.34    0.18
  -4 -10   1    0.28    0.19
  -4  10   1    0.08    0.12
   4  10  -1    0.20    0.12
  -3 -10   1    6.07    0.41
  -3  10   1    6.63    0.29
   3  10  -1    6.37    0.27
  -2 -10   1    1.80    0.27
   2  10  -1    1.43    0.11
  -2  10   1    1.62    0.14
   2  10  -1    1.57    0.13
  -2  10   1    1.80    0.14
  -1 -10   1    0.21    0.20
  -1 -10   1   -0.30    0.16
   1 -10  -1   -0.02    0.18
  -1  10   1    0.01    0.06
  -1  10   1    0.07    0.06
   0 -10   1    1.00    0.24
   0 -10  -1    1.26    0.24
   0 -10   1    1.25    0.24
   1 -10   1   28.87    1.00
   1 -10   1   30.11    0.98
  -1 -10  -1   29.32    0.95
  -1  10  -1   28.24    0.73
  -1  10  -1   28.13    0.72
  -2 -10  -1    1.01    0.22
   2 -10   1    0.96    0.23
   2  10   1    1.09    0.11
   2  10   1    0.95    0.11
  -2  10  -1    1.02    0.11
  -2  10  -1    0.85    0.11
  -3 -10  -1    0.95    0.22
   3 -10   1    1.27    0.24
  -3  10  -1    1.25    0.15
   3  10   1    1.18    0.14
  -4 -10  -1    2.12    0.27
   4 -10   1    2.83    0.31
   4  10   1    2.74    0.22
  -4  10  -1    2.56    0.22
   5 -10   1    1.31    0.25
  -5 -10  -1    1.02    0.22
  -5  10  -1    1.44    0.20
   5  10   1    1.14    0.19
   6 -10   1    0.91    0.22
  -6 -10  -1    1.01    0.22
   6  10   1    0.95    0.19
  -6  10  -1    1.05    0.20
  -7 -10  -1    0.57    0.20
  -7  10  -1    0.40    0.18
   7  10   1    0.25    0.19
  -8 -10  -1   -0.33    0.17
   8  10   1   -0.30    0.16
  -8  10  -1    0.48    0.20
  -9 -10  -1    1.22    0.27
   9  10   1    1.56    0.29
  -9  10  -1    1.02    0.27
 -10 -10  -1    0.07    0.20
  10  10   1    0.25    0.24
 -10  10  -1    0.05    0.22
 -11 -10  -1    0.64    0.26
 -11  10  -1    0.28    0.25
  11  10   1    0.50    0.27
 -10 -11   1    1.10    0.29
 -10  11   1    0.50    0.26
  10  11  -1    0.83    0.28
  -9 -11   1   -0.22    0.20
   9  11  -1    0.03    0.20
  -9  11   1   -0.10    0.19
  -8 -11   1    0.37    0.22
  -8  11   1    0.14    0.20
   8  11  -1    0.40    0.21
  -7 -11   1    0.17    0.21
  -7  11   1    0.22    0.19
   7  11  -1    0.50    0.19
  -6 -11   1    0.53    0.22
   6  11  -1    0.47    0.17
  -6  11   1    0.11    0.16
  -5 -11   1    0.20    0.19
   5  11  -1    0.19    0.14
  -5  11   1    0.49    0.16
  -4 -11   1    2.78    0.33
  -4  11   1    2.88    0.24
   4  11  -1    2.57    0.21
  -3 -11   1    5.58    0.40
   3  11  -1    5.61    0.26
  -3  11   1    5.39    0.28
  -2 -11   1    0.61    0.21
   2  11  -1    0.69    0.09
  -2  11   1    0.56    0.11
   1 -11  -1    8.13    0.46
  -1 -11   1    7.63    0.47
  -1  11   1    7.12    0.25
  -1  11   1    7.02    0.24
   0 -11  -1    0.05    0.19
   0 -11   1    0.17    0.20
   1 -11   1    0.49    0.20
  -1 -11  -1    0.79    0.21
   1 -11   1    0.37    0.21
  -1  11  -1    0.35    0.07
  -2 -11  -1    0.78    0.21
   2 -11   1    0.53    0.22
  -2  11  -1    0.67    0.10
   2  11   1    0.46    0.09
  -3 -11  -1   -0.17    0.17
   3 -11   1   -0.28    0.16
   3  11   1   -0.07    0.10
  -3  11  -1    0.03    0.10
   4 -11   1    0.00    0.20
  -4 -11  -1    0.15    0.18
  -4  11  -1    0.12    0.13
   4  11   1    0.17    0.12
  -5 -11  -1   -0.05    0.16
   5 -11   1   -0.20    0.16
  -5  11  -1    0.17    0.15
   5  11   1    0.39    0.15
  -6 -11  -1    0.14    0.19
   6  11   1    0.13    0.15
  -6  11  -1    0.23    0.16
  -7 -11  -1    0.48    0.22
  -7  11  -1    0.42    0.20
   7  11   1    0.20    0.18
  -8 -11  -1    0.50    0.23
   8  11   1    0.01    0.18
  -8  11  -1   -0.07    0.18
  -9 -11  -1    2.39    0.35
   9  11   1    2.40    0.33
  -9  11  -1    2.63    0.34
 -10 -11  -1    0.10    0.22
 -10  11  -1   -0.01    0.23
  10  11   1   -0.13    0.24
  -9 -12   1    0.04    0.23
   9  12  -1   -0.32    0.19
  -9  12   1    0.27    0.23
  -8 -12   1   -0.11    0.22
  -8  12   1    0.22    0.21
   8  12  -1   -0.28    0.17
  -7 -12   1    0.23    0.21
   7  12  -1    0.03    0.18
  -7  12   1   -0.01    0.17
  -6 -12   1    0.03    0.21
   6  12  -1    0.36    0.17
  -6  12   1    0.31    0.18
  -5 -12   1    0.47    0.23
   5  12  -1    0.06    0.14
  -5  12   1    0.28    0.15
  -4 -12   1   -0.03    0.19
  -4  12   1   -0.20    0.12
   4  12  -1    0.07    0.12
  -3 -12   1    1.92    0.30
   3  12  -1    1.60    0.15
  -3  12   1    1.25    0.16
  -2 -12   1   -0.15    0.18
  -2  12   1    0.03    0.09
  -1 -12   1    0.34    0.22
  -1  12   1    0.23    0.07
   0 -12  -1    0.20    0.19
   0 -12   1    0.21    0.22
   1 -12   1    0.53    0.22
  -1 -12  -1    0.22    0.20
  -2 -12  -1    0.83    0.24
  -2  12  -1    0.64    0.10
   2  12   1    0.52    0.10
  -3 -12  -1   -0.03    0.17
   3  12   1    0.08    0.10
  -3  12  -1    0.01    0.10
  -4 -12  -1    0.08    0.18
   4  12   1    0.19    0.13
  -4  12  -1    0.26    0.14
  -5 -12  -1    0.08    0.20
   5  12   1    0.40    0.15
  -5  12  -1    0.53    0.17
  -6 -12  -1    0.69    0.24
   6  12   1    0.45    0.18
  -6  12  -1    0.54    0.18
  -7 -12  -1    0.17    0.20
   7  12   1    0.06    0.18
  -7  12  -1   -0.35    0.15
  -8 -12  -1    1.90    0.32
   8  12   1    1.36    0.26
  -8  12  -1    1.68    0.29
  -9 -12  -1   -0.15    0.20
   9  12   1   -0.03    0.21
  -9  12  -1   -0.19    0.21
  -8 -13   1    0.02    0.23
   8  13  -1   -0.04    0.19
  -8  13   1    0.01    0.20
  -7 -13   1    0.21    0.24
   7  13  -1    0.27    0.19
  -7  13   1    0.28    0.21
  -6 -13   1   -0.02    0.23
  -6  13   1    0.34    0.19
   6  13  -1    0.20    0.17
  -5 -13   1    0.16    0.22
  -5  13   1   -0.28    0.13
   5  13  -1   -0.11    0.13
  -4 -13   1    0.02    0.21
   4  13  -1    0.31    0.13
  -4  13   1   -0.02    0.13
  -3 -13   1    1.24    0.28
   3  13  -1    1.75    0.15
  -3  13   1    1.35    0.17
  -2 -13   1    1.88    0.32
  -2  13   1    2.22    0.16
  -1 -13   1    0.15    0.22
   0 -13  -1    3.26    0.38
   0 -13   1    3.39    0.40
   1 -13   1    1.27    0.28
  -1 -13  -1    1.62    0.30
  -2 -13  -1    0.96    0.25
   2  13   1    1.47    0.12
  -2  13  -1    1.12    0.13
  -3 -13  -1   -0.05    0.20
  -3  13  -1   -0.05    0.11
   3  13   1    0.10    0.10
  -4 -13  -1   -0.10    0.19
   4  13   1    0.14    0.12
  -4  13  -1    0.05    0.12
  -5 -13  -1   -0.04    0.19
   5  13   1    0.01    0.14
  -5  13  -1    0.00    0.14
  -6 -13  -1    0.00    0.21
  -6  13  -1    0.21    0.17
   6  13   1   -0.11    0.15
  -7 -13  -1    0.98    0.28
  -7  13  -1    0.79    0.23
   7  13   1    1.01    0.22
  -8 -13  -1   -0.05    0.22
  -8  13  -1    0.00    0.20
   8  13   1   -0.14    0.18
  -7 -14   1    0.42    0.26
   7  14  -1    0.13    0.19
  -7  14   1    0.16    0.20
  -6 -14   1    0.05    0.21
   6  14  -1    0.53    0.19
  -6  14   1    0.32    0.18
  -5 -14   1   -0.02    0.22
  -5  14   1   -0.16    0.15
   5  14  -1    0.29    0.15
  -4 -14   1    2.11    0.34
  -4  14   1    2.71    0.24
   4  14  -1    2.53    0.21
  -3 -14   1    0.39    0.26
  -3  14   1    0.32    0.13
  -2 -14   1    2.19    0.35
  -2  14   1    1.90    0.16
  -1 -14   1    0.50    0.27
   0 -14   1   -0.15    0.22
   0 -14  -1    0.72    0.26
  -1 -14  -1    0.83    0.27
  -2 -14  -1    0.26    0.23
  -3 -14  -1    0.18    0.21
   3  14   1    0.70    0.13
  -3  14  -1    0.39    0.13
  -4 -14  -1   -0.08    0.21
  -4  14  -1    0.13    0.14
   4  14   1    0.06    0.13
  -5 -14  -1    0.10    0.22
  -5  14  -1    0.07    0.16
   5  14   1    0.10    0.14
  -6 -14  -1    0.44    0.25
  -6  14  -1    0.83    0.21
   6  14   1    0.39    0.18
  -7 -14  -1   -0.18    0.21
  -7  14  -1    0.13    0.20
   7  14   1    0.10    0.18
  -5 -15   1   -0.10    0.25
  -5  15   1    0.23    0.18
  -4 -15   1   -0.02    0.24
  -4  15   1    0.28    0.15
  -3 -15   1    0.59    0.27
  -2 -15   1    1.46    0.35
  -1 -15   1    1.34    0.33
   0 -15   1    0.52    0.27
  -1 -15  -1    1.47    0.31
  -2 -15  -1    0.94    0.30
  -3 -15  -1    0.10    0.24
  -4 -15  -1    0.26    0.26
  -4  15  -1    0.07    0.14
  -5 -15  -1   -0.11    0.22
   5  15   1    0.00    0.15
  -5  15  -1   -0.05    0.16
  -3 -16   1    0.24    0.27
  -2 -16   1   -0.16    0.25
  -1 -16   1   -0.24    0.24
  -1 -16  -1    0.50    0.29
  -2 -16  -1    0.02    0.24
  -3 -16  -1   -0.03    0.24
 -14   0   2    1.06    0.32
  14   0  -2    1.32    0.37
 -13   0   2   -0.27    0.17
  13   0  -2   -0.26    0.21
  12   0  -2    0.07    0.24
 -12   0   2    0.50    0.25
  11   0  -2    0.14    0.20
 -11   0   2    0.06    0.18
 -10   0   2    2.38    0.32
  10   0  -2    1.53    0.28
  -9   0   2    0.20    0.18
   9   0  -2    0.16    0.20
   8   0  -2    4.38    0.34
  -8   0   2    4.76    0.37
  -7   0   2    0.08    0.15
   7   0  -2    0.04    0.15
  -6   0   2   17.20    0.60
   6   0  -2   16.74    0.60
  -5   0   2   -0.07    0.10
   5   0  -2   -0.12    0.11
  -4   0   2   12.81    0.43
   4   0  -2   12.58    0.44
  -3   0   2   -0.07    0.03
   3   0  -2   -0.05    0.09
  -3   0   2   -0.09    0.08
  -2   0   2 1000.00   23.40
   2   0  -2  982.33   23.41
  -1   0   2    0.03    0.04
   1   0  -2   -0.02    0.03
  -1   0   2   -0.06    0.03
   1   0  -2    0.01    0.03
   0   0   2   -0.12    0.02
   0   0   2   -0.17    0.02
   0   0  -2   -0.15    0.02
   0   0  -2   -0.16    0.02
  -1   0  -2   -0.20    0.03
   1   0   2   -0.21    0.03
  -1   0  -2   -0.20    0.03
   1   0   2   -0.14    0.04
  -2   0  -2  126.57    3.01
   2   0   2  125.91    3.02
  -3   0  -2   -0.02    0.08
   3   0   2    0.00    0.10
   4   0   2    2.65    0.20
  -4   0  -2    2.40    0.19
  -5   0  -2   -0.17    0.10
   5   0   2    0.03    0.12
  -6   0  -2    0.77    0.16
   6   0   2    0.66    0.16
  -7   0  -2    0.07    0.13
   7   0   2   -0.05    0.15
   8   0   2    1.97    0.27
  -8   0  -2    1.56    0.23
  -9   0  -2    0.14    0.18
   9   0   2   -0.11    0.17
 -10   0  -2   23.77    0.87
  10   0   2   21.68    0.88
  11   0   2    0.12    0.22
 -11   0  -2   -0.06    0.20
 -12   0  -2    0.41    0.24
  12   0   2    0.16    0.22
 -13   0  -2    0.13    0.24
  13   0   2    0.23    0.27
 -14   0  -2    1.41    0.36
  14   0   2    1.15    0.36
 -14  -1   2    0.90    0.31
  14  -1  -2    0.25    0.29
  14   1  -2    0.65    0.31
 -14   1   2    0.08    0.25
  13  -1  -2    0.11    0.25
 -13  -1   2    0.06    0.21
  13   1  -2    0.22    0.25
 -13   1   2    0.08    0.24
 -12  -1   2   -0.06    0.19
  12  -1  -2   -0.09    0.22
 -12   1   2   -0.29    0.18
  12   1  -2    0.20    0.25
 -11  -1   2    0.72    0.25
  11  -1  -2    0.83    0.25
 -11   1   2    0.75    0.25
  11   1  -2    0.82    0.26
  10  -1  -2    7.48    0.48
 -10  -1   2    8.25    0.48
  10   1  -2    7.82    0.49
 -10   1   2    7.49    0.50
   9  -1  -2    3.76    0.36
  -9  -1   2    4.19    0.37
  -9   1   2    3.86    0.37
   9   1  -2    3.76    0.36
   8  -1  -2    0.34    0.18
  -8  -1   2    0.28    0.17
   8   1  -2    0.25    0.18
  -8   1   2    0.18    0.16
   7  -1  -2   -0.21    0.13
  -7  -1   2   -0.02    0.13
  -7   1   2   -0.06    0.12
   7   1  -2    0.18    0.14
  -6  -1   2    2.32    0.22
   6  -1  -2    1.88    0.21
  -6   1   2    2.46    0.23
   6   1  -2    1.81    0.22
   5  -1  -2   21.79    0.67
  -5  -1   2   20.57    0.67
  -5   1   2   21.38    0.68
   5   1  -2   21.08    0.56
   5   1  -2   22.68    0.68
  -4  -1   2    3.84    0.22
   4  -1  -2    3.71    0.22
  -4   1   2    3.56    0.24
   4   1  -2    4.02    0.16
   4   1  -2    3.24    0.24
  -3  -1   2  209.10    4.99
  -3  -1   2  208.01    4.92
   3  -1  -2  207.88    4.92
   3   1  -2  205.91    4.92
  -3   1   2  206.51    4.96
   3   1  -2  206.04    4.96
  -3   1   2  204.91    4.92
  -2  -1   2   26.89    0.69
   2  -1  -2   26.99    0.70
  -2  -1   2   27.06    0.68
   2   1  -2   26.48    0.69
  -2   1   2   26.32    0.70
   2   1  -2   26.53    0.69
  -2   1   2   26.19    0.70
   2   1  -2   26.43    0.68
   0  -1  -2   -0.02    0.03
   0  -1   2    0.00    0.03
   0  -1  -2   -0.06    0.03
   0  -1  -2   -0.02    0.03
   0  -1   2   -0.02    0.03
   0  -1   2   -0.03    0.02
   0   1   2    0.01    0.03
   0   1  -2   -0.05    0.02
   0   1  -2   -0.04    0.02
   0   1   2   -0.02    0.02
   1  -1   2   19.50    0.48
  -1  -1  -2   17.15    0.48
  -2  -1  -2  286.87    6.72
   2  -1   2  281.13    6.79
  -2   1  -2  284.25    6.80
   2   1   2  288.19    6.73
  -2   1  -2  285.74    6.73
   2   1   2  287.81    6.73
   3  -1   2    0.27    0.10
  -3  -1  -2    0.40    0.10
   3   1   2    0.58    0.11
  -3   1  -2    0.36    0.10
  -4  -1  -2    0.24    0.11
   4  -1   2    0.14    0.11
   4   1   2    0.38    0.12
  -4   1  -2    0.15    0.10
  -5  -1  -2    0.07    0.11
   5  -1   2   -0.13    0.10
   5   1   2   -0.01    0.11
  -5   1  -2    0.01    0.11
  -6  -1  -2    0.60    0.15
   6  -1   2    0.49    0.16
   6   1   2    0.37    0.15
  -6   1  -2    0.25    0.14
   7  -1   2    0.16    0.15
  -7  -1  -2   -0.01    0.13
   7   1   2    0.25    0.15
  -7   1  -2    0.11    0.13
  -8  -1  -2    5.73    0.36
   8  -1   2    4.89    0.38
   8   1   2    5.36    0.40
  -8   1  -2    5.35    0.36
  -9  -1  -2   -0.19    0.16
   9  -1   2    0.06    0.20
   9  -1   2    0.01    0.07
  -9   1  -2   -0.06    0.17
   9   1   2   -0.05    0.20
  10  -1   2    0.15    0.22
 -10  -1  -2    0.41    0.21
  10   1   2    0.29    0.21
 -10   1  -2    0.48    0.23
  11  -1   2    0.81    0.27
 -11  -1  -2    0.61    0.24
 -11   1  -2    0.63    0.24
  11   1   2    0.61    0.26
  12  -1   2   -0.01    0.21
 -12  -1  -2    0.13    0.21
  12   1   2   -0.11    0.23
 -12   1  -2    0.01    0.21
 -13  -1  -2    1.63    0.35
  13  -1   2    2.02    0.36
  13   1   2    2.02    0.38
 -13   1  -2    1.19    0.31
 -14  -1  -2   -0.05    0.24
  14  -1   2    0.24    0.29
  14   1   2    0.09    0.27
 -14   1  -2   -0.19    0.25
  14  -2  -2    0.31    0.27
 -14  -2   2   -0.11    0.23
  14   2  -2    0.18    0.28
 -14   2   2   -0.24    0.24
 -13  -2   2    0.55    0.26
  13  -2  -2    0.05    0.25
  13   2  -2    0.29    0.25
 -13   2   2   -0.07    0.23
  12  -2  -2    2.41    0.37
 -12  -2   2    1.60    0.30
  12   2  -2    1.89    0.34
 -12   2   2    1.48    0.31
 -11  -2   2   -0.36    0.16
  11  -2  -2    0.39    0.22
 -11   2   2    0.41    0.23
  11   2  -2    0.44    0.24
 -10  -2   2    1.50    0.24
  10  -2  -2    1.32    0.27
 -10   2   2    1.15    0.26
  10   2  -2    1.28    0.27
   9  -2  -2    2.12    0.29
  -9  -2   2    2.56    0.30
  -9   2   2    2.19    0.29
   9   2  -2    2.56    0.32
   8  -2  -2    3.77    0.34
  -8  -2   2    3.58    0.31
   8   2  -2    3.95    0.35
  -8   2   2    3.88    0.34
   7  -2  -2    0.13    0.16
  -7  -2   2    0.39    0.16
   7   2  -2    0.34    0.08
   7   2  -2    0.37    0.16
  -7   2   2    0.36    0.15
  -6  -2   2   16.45    0.57
   6  -2  -2   16.82    0.58
  -6   2   2   17.26    0.59
   6   2  -2   16.32    0.48
   6   2  -2   16.17    0.59
  -5  -2   2   -0.12    0.10
   5  -2  -2   -0.14    0.11
   5   2  -2   -0.13    0.10
  -5   2   2   -0.01    0.11
   5   2  -2   -0.09    0.07
  -4  -2   2   23.74    0.64
  -4  -2   2   23.90    0.68
   4  -2  -2   24.13    0.69
   4   2  -2   23.36    0.64
  -4   2   2   23.55    0.69
   4   2  -2   22.71    0.68
  -4   2   2   23.19    0.60
  -3  -2   2    0.09    0.08
  -3  -2   2   -0.03    0.07
   3  -2  -2    0.04    0.08
   3   2  -2    0.03    0.07
  -3   2   2    0.05    0.06
  -3   2   2   -0.08    0.08
   3   2  -2   -0.01    0.09
   2  -2  -2   14.61    0.42
  -2  -2   2   14.50    0.42
  -2  -2   2   14.87    0.41
   2   2  -2   13.95    0.42
  -2   2   2   14.15    0.41
  -2   2   2   13.42    0.41
   2   2  -2   14.35    0.41
  -2   2   2   14.34    0.41
   2   2  -2   14.49    0.41
   1  -2  -2  310.23    7.29
  -1  -2   2  302.77    7.11
  -1  -2   2  310.20    7.20
  -1  -2   2  309.54    7.43
   1   2  -2  308.09    7.20
  -1   2   2  285.21    7.26
  -1   2   2  304.86    7.29
   1   2  -2  315.43    7.37
   1   2  -2  296.69    7.26
   0   2   2    8.03    0.24
   0   2  -2    9.13    0.24
   1  -2   2   61.83    1.52
   1  -2   2   60.48    1.50
   1  -2   2   60.73    1.56
  -1  -2  -2   65.37    1.49
  -1  -2  -2   62.47    1.50
   1   2   2   63.04    1.51
  -1   2  -2   62.48    1.50
   1   2   2   61.86    1.50
  -1   2  -2   62.72    1.50
   2  -2   2    1.18    0.11
  -2  -2  -2    1.37    0.11
   2  -2   2    1.13    0.11
   2   2   2    1.18    0.11
  -2   2  -2    1.31    0.11
   2   2   2    1.32    0.12
  -2   2  -2    1.45    0.12
   3  -2   2   -0.03    0.09
  -3  -2  -2    0.03    0.08
  -3   2  -2   -0.01    0.08
   3   2   2    0.05    0.08
  -4  -2  -2    1.39    0.16
   4  -2   2    1.15    0.15
  -4   2  -2    1.32    0.15
   4   2   2    1.41    0.15
  -5  -2  -2    1.84    0.18
   5  -2   2    1.66    0.18
   5   2   2    1.84    0.19
  -5   2  -2    1.61    0.18
   6  -2   2    3.36    0.26
  -6  -2  -2    3.60    0.28
   6  -2   2    3.72    0.18
   6   2   2    3.51    0.27
  -6   2  -2    3.72    0.26
  -7  -2  -2    0.13    0.13
   7  -2   2    0.03    0.08
   7  -2   2    0.02    0.14
   7   2   2    0.09    0.14
  -7   2  -2    0.13    0.15
   8  -2   2    0.16    0.19
   8  -2   2    0.31    0.08
  -8  -2  -2    0.25    0.16
   8   2   2    0.05    0.09
   8   2   2    0.31    0.19
  -8   2  -2    0.21    0.17
  -9  -2  -2    3.66    0.34
   9  -2   2    3.32    0.34
   9  -2   2    3.72    0.17
   9   2   2    3.75    0.38
  -9   2  -2    3.26    0.36
  10  -2   2    1.22    0.28
 -10  -2  -2    1.17    0.26
  10   2   2    1.17    0.29
 -10   2  -2    1.14    0.26
  11  -2   2    0.54    0.25
 -11  -2  -2    0.74    0.25
  11   2   2    0.54    0.25
 -11   2  -2    0.90    0.25
  12  -2   2    2.96    0.40
 -12  -2  -2    3.10    0.38
  12   2   2    2.63    0.40
 -12   2  -2    2.42    0.36
 -13  -2  -2    0.01    0.23
  13  -2   2    0.10    0.25
 -13   2  -2   -0.09    0.24
  13   2   2    0.05    0.24
  14  -2   2    0.06    0.28
 -14  -2  -2   -0.24    0.24
  14   2   2   -0.05    0.26
 -14   2  -2   -0.14    0.27
  14  -3  -2   -0.11    0.24
  14   3  -2    0.51    0.31
 -14   3   2    0.12    0.26
 -13  -3   2    0.41    0.22
  13  -3  -2    0.22    0.24
  13   3  -2    0.50    0.30
 -13   3   2    0.02    0.25
  12  -3  -2    0.23    0.24
 -12  -3   2    0.13    0.20
 -12   3   2    0.38    0.25
  12   3  -2    0.17    0.26
  11  -3  -2   -0.06    0.19
 -11  -3   2    0.12    0.18
  11   3  -2    0.35    0.24
 -11   3   2   -0.01    0.19
 -10  -3   2    0.68    0.20
  10  -3  -2    0.73    0.22
  10   3  -2    1.19    0.27
 -10   3   2    1.20    0.25
   9  -3  -2   12.17    0.59
  -9  -3   2   10.97    0.53
   9   3  -2   11.92    0.59
  -9   3   2   11.74    0.58
  -8  -3   2   -0.06    0.13
   8  -3  -2    0.09    0.17
  -8   3   2   -0.08    0.16
   8   3  -2   -0.21    0.15
   8   3  -2   -0.09    0.09
   7  -3  -2    5.31    0.36
  -7  -3   2    6.18    0.33
   7   3  -2    5.34    0.34
   7   3  -2    5.45    0.27
  -7   3   2    5.99    0.37
  -6  -3   2    7.60    0.34
   6  -3  -2    7.13    0.37
  -6   3   2    8.23    0.39
   6   3  -2    7.63    0.31
   6   3  -2    7.63    0.37
   5  -3  -2    1.35    0.17
  -5  -3   2    2.02    0.18
  -5   3   2    1.59    0.18
  -5   3   2    1.65    0.12
   5   3  -2    1.77    0.15
   5   3  -2    1.50    0.18
  -4  -3   2    0.69    0.12
   4  -3  -2    0.58    0.12
  -4  -3   2    1.05    0.13
   4   3  -2    0.71    0.11
   4   3  -2    0.34    0.12
  -4   3   2    0.64    0.12
  -4   3   2    0.62    0.09
   3  -3  -2    0.51    0.10
  -3  -3   2    0.45    0.11
  -3  -3   2    0.44    0.09
  -3   3   2    0.59    0.09
   3   3  -2    0.61    0.10
   3   3  -2    0.45    0.10
  -3   3   2    0.63    0.11
   3   3  -2    0.68    0.11
  -2  -3   2   44.98    1.15
  -2  -3   2   44.31    1.17
   2  -3  -2   45.12    1.11
  -2   3   2   44.69    1.12
  -2   3   2   43.93    1.12
   2   3  -2   44.02    1.16
   2   3  -2   43.19    1.11
  -2   3   2   44.55    1.15
   2   3  -2   45.73    1.11
  -1  -3   2    0.47    0.10
  -1  -3   2    0.45    0.04
  -1  -3   2    0.68    0.12
  -1  -3   2    0.55    0.04
   1   3  -2    0.57    0.06
  -1   3   2    0.43    0.07
  -1   3   2    0.43    0.07
   1   3  -2    0.40    0.06
  -1   3   2    0.35    0.10
   1   3  -2    0.60    0.07
   1   3  -2    0.37    0.10
   0  -3  -2   60.30    1.47
   0  -3   2   61.04    1.50
   0  -3  -2   60.89    1.43
   0  -3   2   60.02    1.55
   0   3  -2   60.35    1.44
   0   3   2   61.25    1.45
   0   3  -2   61.19    1.44
   0   3   2   60.17    1.45
   0   3  -2   60.58    1.54
   1  -3   2   42.39    1.11
  -1  -3  -2   41.18    1.04
   1   3   2   42.10    1.03
  -1   3  -2   42.46    1.11
   1   3   2   43.02    1.03
  -1   3  -2   42.18    1.03
  -1   3  -2   41.58    1.03
  -2  -3  -2   66.73    1.63
  -2  -3  -2   67.80    1.63
   2  -3   2   66.11    1.69
   2  -3   2   65.66    1.63
  -2   3  -2   66.88    1.64
   2   3   2   67.19    1.64
  -2   3  -2   68.19    1.64
   2   3   2   67.24    1.64
   3  -3   2    5.97    0.25
   3  -3   2    6.05    0.25
  -3  -3  -2    5.62    0.24
   3   3   2    5.86    0.26
  -3   3  -2    5.27    0.25
   3   3   2    5.98    0.25
   4  -3   2   32.79    0.90
   4  -3   2   32.85    0.89
  -4  -3  -2   33.40    0.90
   4   3   2   32.22    0.91
  -4   3  -2   33.21    0.92
   5  -3   2   13.67    0.44
   5  -3   2   13.50    0.49
  -5  -3  -2   13.82    0.47
   5   3   2   14.00    0.50
  -5   3  -2   13.95    0.50
  -6  -3  -2    8.90    0.39
   6  -3   2    8.38    0.32
   6  -3   2    8.49    0.40
  -6   3  -2    9.16    0.40
   6   3   2    9.29    0.42
   7  -3   2    1.32    0.22
   7  -3   2    1.24    0.13
  -7  -3  -2    1.20    0.20
   7   3   2    1.21    0.15
  -7   3  -2    1.38    0.21
   7   3   2    0.78    0.19
   8  -3   2    1.85    0.25
   8  -3   2    2.10    0.17
  -8  -3  -2    1.70    0.23
   8   3   2    1.88    0.27
   8   3   2    2.30    0.20
  -8   3  -2    1.80    0.26
  -9  -3  -2   -0.35    0.13
   9  -3   2    0.07    0.08
   9  -3   2    0.07    0.20
  -9   3  -2    0.22    0.18
   9   3   2    0.03    0.19
 -10  -3  -2    1.63    0.28
  10  -3   2    1.48    0.28
  10   3   2    1.51    0.29
 -10   3  -2    1.09    0.24
  11  -3   2    4.43    0.44
 -11  -3  -2    4.63    0.42
  11   3   2    3.80    0.42
 -11   3  -2    3.86    0.43
  12  -3   2    0.36    0.25
 -12  -3  -2    0.39    0.23
 -12   3  -2    0.63    0.26
  12   3   2    0.22    0.27
  13  -3   2    0.22    0.24
 -13  -3  -2   -0.03    0.21
 -13   3  -2    0.45    0.26
  13   3   2    0.38    0.28
  14  -3   2   -0.25    0.25
  14   3   2    0.35    0.30
 -14   3  -2    0.09    0.29
  14   4  -2    1.33    0.35
 -14   4   2    0.99    0.33
  13  -4  -2   -0.19    0.22
  13   4  -2   -0.33    0.23
 -13   4   2    0.07    0.26
  12  -4  -2    0.22    0.24
  12   4  -2    0.10    0.25
 -12   4   2    0.22    0.24
  11  -4  -2    0.25    0.23
 -11  -4   2   -0.17    0.16
 -11   4   2    0.08    0.22
  11   4  -2   -0.16    0.22
  10  -4  -2    0.14    0.18
 -10  -4   2    0.20    0.17
 -10   4   2    0.45    0.21
  10   4  -2    0.29    0.23
   9  -4  -2   19.22    0.74
  -9  -4   2   17.55    0.69
   9   4  -2   17.34    0.72
  -9   4   2   18.08    0.74
   8  -4  -2    1.12    0.24
  -8  -4   2    1.04    0.21
  -8   4   2    1.40    0.25
   8   4  -2    1.27    0.17
   8   4  -2    1.23    0.25
   7  -4  -2   45.49    1.29
  -7  -4   2   45.01    1.28
   7   4  -2   45.06    1.24
  -7   4   2   46.85    1.33
   7   4  -2   45.11    1.31
   6  -4  -2    1.79    0.21
  -6  -4   2    1.89    0.20
   6   4  -2    1.92    0.18
  -6   4   2    1.67    0.20
   6   4  -2    2.03    0.23
   5  -4  -2   11.99    0.45
  -5  -4   2   12.79    0.44
  -5   4   2   12.20    0.47
   5   4  -2   12.17    0.44
  -5   4   2   12.37    0.40
   5   4  -2   12.59    0.46
  -4  -4   2    8.15    0.34
  -4  -4   2    7.61    0.30
   4  -4  -2    8.35    0.32
  -4   4   2    7.78    0.30
  -4   4   2    7.99    0.33
   4   4  -2    7.85    0.34
   4   4  -2    8.17    0.33
  -3  -4   2   17.98    0.58
   3  -4  -2   18.77    0.52
  -3  -4   2   18.71    0.58
  -3  -4   2   16.85    0.50
   3   4  -2   18.37    0.53
  -3   4   2   18.69    0.55
   3   4  -2   18.80    0.53
   3   4  -2   18.10    0.57
  -3   4   2   18.53    0.54
  -3   4   2   17.71    0.55
  -2  -4   2    0.56    0.13
  -2  -4   2    0.55    0.12
  -2  -4   2    0.58    0.06
   2   4  -2    0.54    0.09
   2   4  -2    0.57    0.12
  -2   4   2    0.75    0.09
  -2   4   2    0.48    0.09
   2   4  -2    0.54    0.08
  -2   4   2    0.61    0.11
  -1  -4   2   37.52    0.99
  -1  -4   2   38.70    1.03
  -1   4   2   38.17    1.02
   1   4  -2   36.51    1.02
   1   4  -2   38.19    0.91
   1   4  -2   37.61    0.91
  -1   4   2   37.00    0.93
  -1   4   2   37.24    0.93
   0  -4   2    3.15    0.20
   0  -4   2    3.61    0.23
   0  -4  -2    3.26    0.19
   0   4  -2    3.18    0.10
   0   4   2    3.09    0.12
   0   4  -2    3.10    0.20
   0   4   2    3.14    0.20
   0   4  -2    3.41    0.11
   0   4   2    3.23    0.13
   1  -4   2   20.79    0.63
   1  -4   2   20.43    0.61
  -1  -4  -2   21.10    0.58
   1   4   2   20.42    0.62
  -1   4  -2   20.54    0.62
  -1   4  -2   21.08    0.54
  -1   4  -2   21.00    0.54
   1   4   2   21.13    0.54
   1   4   2   21.27    0.54
   2  -4   2   13.39    0.45
  -2  -4  -2   13.25    0.42
   2   4   2   12.67    0.40
  -2   4  -2   13.86    0.45
  -2   4  -2   13.43    0.40
   2   4   2   13.18    0.46
   2   4   2   13.45    0.39
  -2   4  -2   13.56    0.40
   3  -4   2    4.04    0.20
  -3  -4  -2    4.19    0.22
   3  -4   2    4.06    0.24
  -3  -4  -2    3.77    0.19
   3   4   2    4.34    0.22
   3   4   2    3.88    0.21
  -3   4  -2    3.83    0.22
   3   4   2    4.32    0.25
  -3   4  -2    3.96    0.21
   4  -4   2    1.95    0.17
   4  -4   2    2.14    0.18
  -4  -4  -2    2.32    0.17
   4   4   2    2.47    0.21
  -4   4  -2    2.23    0.20
   4   4   2    2.51    0.20
  -5  -4  -2    0.77    0.14
   5  -4   2    0.63    0.14
   5  -4   2    0.64    0.12
   5   4   2    0.64    0.15
  -5   4  -2    0.39    0.14
   6  -4   2   27.08    0.83
  -6  -4  -2   26.85    0.81
   6  -4   2   25.90    0.76
   6   4   2   27.36    0.85
  -6   4  -2   26.70    0.84
  -7  -4  -2   12.01    0.49
   7  -4   2   12.00    0.51
   7  -4   2   11.41    0.41
  -7   4  -2   10.39    0.51
   7   4   2   12.22    0.53
  -8  -4  -2    2.34    0.27
   8  -4   2    2.80    0.20
   8  -4   2    2.45    0.30
   8   4   2    2.25    0.29
  -8   4  -2    2.22    0.29
  -9  -4  -2    1.95    0.26
   9  -4   2    2.10    0.29
   9  -4   2    1.81    0.16
  -9   4  -2    1.87    0.28
   9   4   2    2.18    0.31
  10  -4   2   -0.12    0.18
 -10  -4  -2    0.20    0.18
 -10   4  -2   -0.01    0.17
  10   4   2    0.21    0.22
 -11  -4  -2    3.91    0.39
  11  -4   2    3.37    0.39
  11   4   2    3.81    0.43
 -11   4  -2    3.18    0.39
  12  -4   2    0.42    0.24
  12   4   2    0.96    0.31
 -12   4  -2    0.82    0.27
 -13   4  -2    1.20    0.34
  13   4   2    1.54    0.36
  13   5  -2    0.49    0.31
 -13   5   2    0.88    0.32
 -12   5   2    0.98    0.30
  12   5  -2    0.53    0.29
  11  -5  -2    3.87    0.40
 -11   5   2    3.90    0.42
  11   5  -2    3.75    0.42
  10  -5  -2    6.07    0.44
 -10  -5   2    6.09    0.40
 -10   5   2    6.38    0.47
  10   5  -2    6.17    0.47
   9  -5  -2    0.21    0.18
  -9  -5   2   -0.12    0.14
   9   5  -2   -0.19    0.16
  -9   5   2   -0.03    0.18
   8  -5  -2    0.29    0.19
  -8  -5   2    0.82    0.18
   8   5  -2    0.37    0.20
  -8   5   2    0.50    0.19
   7  -5  -2   29.52    0.92
  -7  -5   2   29.99    0.90
  -7   5   2   29.11    0.95
   7   5  -2   29.96    0.95
   6  -5  -2    0.17    0.14
  -6  -5   2    0.18    0.12
  -6   5   2    0.42    0.11
   6   5  -2    0.31    0.16
  -6   5   2    0.28    0.15
   5  -5  -2   -0.07    0.10
  -5  -5   2    0.23    0.10
  -5   5   2    0.07    0.09
   5   5  -2    0.07    0.11
  -5   5   2    0.05    0.11
  -4  -5   2    5.09    0.30
  -4  -5   2    4.89    0.22
  -4  -5   2    4.92    0.28
   4  -5  -2    5.18    0.25
  -4   5   2    5.48    0.27
   4   5  -2    5.00    0.26
  -4   5   2    4.48    0.26
   4   5  -2    5.29    0.27
  -3  -5   2   24.52    0.63
  -3  -5   2   25.18    0.77
  -3  -5   2   24.54    0.64
  -3  -5   2   24.95    0.75
  -3   5   2   24.52    0.69
  -3   5   2   24.87    0.69
  -3   5   2   25.15    0.74
   3   5  -2   24.76    0.68
   3   5  -2   24.72    0.68
  -2  -5   2    6.51    0.30
   2  -5  -2    6.40    0.20
  -2  -5   2    6.29    0.32
  -2   5   2    5.97    0.31
  -2   5   2    6.29    0.24
   2   5  -2    6.67    0.23
  -2   5   2    6.35    0.24
   2   5  -2    6.45    0.22
  -1  -5   2    6.85    0.32
  -1  -5   2    7.54    0.34
  -1   5   2    7.19    0.32
  -1   5   2    7.01    0.23
  -1   5   2    7.27    0.23
   1   5  -2    7.11    0.20
   1   5  -2    7.27    0.21
   1   5  -2    7.18    0.32
   0  -5   2    0.06    0.10
   0  -5   2    0.04    0.10
   0  -5  -2    0.08    0.10
   0   5   2    0.01    0.04
   0   5   2    0.01    0.04
   0   5  -2    0.03    0.08
   0   5   2   -0.02    0.07
  -1  -5  -2    0.02    0.09
   1  -5   2    0.05    0.11
   1  -5   2    0.02    0.10
  -1   5  -2   -0.01    0.08
   1   5   2    0.02    0.05
   1   5   2    0.12    0.05
  -1   5  -2    0.07    0.05
  -1   5  -2    0.15    0.05
   2  -5   2    3.64    0.25
  -2  -5  -2    4.31    0.23
   2  -5   2    4.28    0.25
   2  -5   2    4.13    0.14
  -2   5  -2    4.14    0.19
  -2   5  -2    3.94    0.19
   2   5   2    4.07    0.19
  -2   5  -2    4.01    0.25
   2   5   2    4.22    0.19
   3  -5   2  191.92    4.68
  -3  -5  -2  187.89    4.53
  -3   5  -2  190.27    4.68
   3   5   2  188.01    4.54
  -3   5  -2  191.99    4.55
  -3   5  -2  191.07    4.55
   3   5   2  190.79    4.54
  -4  -5  -2    0.24    0.12
   4  -5   2    0.24    0.11
  -4  -5  -2    0.29    0.10
   4  -5   2    0.18    0.10
  -4   5  -2    0.05    0.11
   4   5   2    0.10    0.11
   5  -5   2    3.39    0.23
  -5  -5  -2    3.26    0.22
   5  -5   2    3.08    0.24
  -5   5  -2    3.43    0.26
   5   5   2    3.02    0.25
   6  -5   2   -0.07    0.10
  -6  -5  -2    0.07    0.11
   6  -5   2    0.04    0.13
  -6   5  -2    0.09    0.14
   6   5   2   -0.14    0.12
   7  -5   2    4.00    0.31
   7  -5   2    3.40    0.24
  -7  -5  -2    3.50    0.28
   7   5   2    3.19    0.31
  -7   5  -2    3.72    0.32
   8  -5   2    3.90    0.34
   8  -5   2    4.41    0.27
  -8  -5  -2    4.41    0.35
   8   5   2    3.68    0.34
  -8   5  -2    4.01    0.36
   9  -5   2    2.17    0.19
  -9  -5  -2    2.44    0.28
   9  -5   2    2.31    0.29
  -9   5  -2    2.51    0.31
   9   5   2    2.50    0.32
  10  -5   2   -0.11    0.18
 -10  -5  -2    0.03    0.16
  10   5   2   -0.16    0.19
 -10   5  -2    0.00    0.18
  11  -5   2    0.02    0.19
  11   5   2   -0.03    0.22
 -11   5  -2    0.18    0.24
  12   5   2    0.66    0.29
 -12   5  -2    0.18    0.24
  13   5   2   -0.12    0.27
 -13   5  -2    0.15    0.26
 -13   6   2    0.26    0.27
  13   6  -2   -0.38    0.24
 -12   6   2    0.61    0.27
  12   6  -2    0.54    0.28
 -11   6   2    2.37    0.37
  11   6  -2    1.86    0.34
 -10   6   2    0.34    0.20
  10   6  -2    0.27    0.22
   9  -6  -2    0.41    0.18
  -9   6   2    0.03    0.19
   9   6  -2   -0.07    0.19
  -8  -6   2    3.23    0.28
   8  -6  -2    3.85    0.32
   8   6  -2    3.41    0.34
  -8   6   2    3.84    0.36
   7  -6  -2    7.66    0.41
  -7  -6   2    8.03    0.37
   7   6  -2    8.96    0.45
  -7   6   2    8.34    0.45
  -6  -6   2    3.69    0.24
   6  -6  -2    3.76    0.28
   6   6  -2    4.15    0.30
  -6   6   2    4.00    0.30
  -6   6   2    4.03    0.27
  -5  -6   2    4.45    0.32
   5  -6  -2    4.87    0.27
  -5  -6   2    4.55    0.22
  -5   6   2    4.92    0.29
   5   6  -2    4.66    0.29
  -4  -6   2    4.24    0.29
  -4  -6   2    4.95    0.30
  -4  -6   2    4.93    0.19
   4  -6  -2    4.34    0.22
  -4  -6   2    4.62    0.19
   4   6  -2    4.90    0.25
   4   6  -2    4.50    0.25
  -4   6   2    4.91    0.26
  -3  -6   2   22.07    0.71
  -3  -6   2   22.93    0.75
   3  -6  -2   22.14    0.59
  -3   6   2   22.20    0.65
   3   6  -2   22.75    0.63
   3   6  -2   22.70    0.63
  -3   6   2   22.30    0.64
  -2  -6   2   34.91    1.04
  -2  -6   2   34.57    1.00
  -2   6   2   35.90    0.90
   2   6  -2   35.23    0.88
   2   6  -2   34.64    0.88
  -2   6   2   34.66    0.90
   1  -6  -2    3.31    0.23
  -1  -6   2    2.94    0.23
  -1  -6   2    3.11    0.26
   1   6  -2    3.13    0.11
   1   6  -2    3.23    0.11
  -1   6   2    3.16    0.14
  -1   6   2    3.07    0.14
   0  -6  -2    6.43    0.30
   0  -6   2    6.62    0.31
   0  -6   2    6.28    0.33
   0   6   2    6.31    0.20
   0   6   2    6.22    0.19
  -1  -6  -2    2.84    0.21
   1  -6   2    2.40    0.22
   1  -6   2    2.45    0.22
  -1   6  -2    2.42    0.12
   1   6   2    2.54    0.13
  -1   6  -2    2.61    0.12
   1   6   2    2.50    0.13
   2  -6   2    0.57    0.15
   2  -6   2    0.58    0.15
  -2  -6  -2    0.51    0.13
   2   6   2    0.48    0.08
  -2   6  -2    0.38    0.09
  -2   6  -2    0.48    0.09
   2   6   2    0.40    0.09
   3  -6   2    5.78    0.21
   3  -6   2    6.05    0.32
  -3  -6  -2    5.94    0.29
  -3   6  -2    6.10    0.27
  -3   6  -2    5.49    0.26
   3   6   2    5.65    0.25
   3   6   2    6.07    0.27
  -4  -6  -2    8.29    0.36
   4  -6   2    8.61    0.38
   4   6   2    8.46    0.34
   4   6   2    8.76    0.36
  -4   6  -2    8.68    0.35
  -5  -6  -2   25.05    0.78
   5  -6   2   25.43    0.79
   5  -6   2   25.19    0.73
  -5  -6  -2   25.81    0.72
  -5   6  -2   24.79    0.77
   5   6   2   24.25    0.77
   6  -6   2    3.67    0.28
  -6  -6  -2    3.91    0.26
   6  -6   2    3.91    0.27
   6   6   2    4.52    0.32
  -6   6  -2    3.96    0.30
  -7  -6  -2    0.48    0.15
   7  -6   2    0.47    0.17
   7  -6   2    0.69    0.15
   7   6   2    0.44    0.19
  -7   6  -2    0.13    0.17
   8  -6   2   11.88    0.45
  -8  -6  -2   11.88    0.49
   8  -6   2   11.20    0.51
   8   6   2   12.51    0.57
  -8   6  -2   11.01    0.55
   9  -6   2    0.60    0.14
   9  -6   2    0.85    0.21
  -9   6  -2    0.08    0.19
   9   6   2    0.59    0.23
  10   6   2   -0.03    0.21
 -10   6  -2   -0.03    0.19
 -11   6  -2    2.01    0.33
  11   6   2    1.85    0.34
 -12   6  -2    0.74    0.30
  12   6   2    1.04    0.32
  13   6   2    0.25    0.26
 -13   6  -2    0.29    0.29
 -13   7   2   -0.20    0.25
  13   7  -2   -0.08    0.25
 -12   7   2    0.57    0.27
  12   7  -2    0.12    0.25
 -11   7   2    0.29    0.25
  11   7  -2    0.72    0.28
 -10   7   2   -0.30    0.19
  10   7  -2    0.19    0.22
   9   7  -2    4.25    0.40
  -9   7   2    4.02    0.39
  -8   7   2    0.08    0.18
   8   7  -2    0.31    0.19
   7  -7  -2    0.93    0.18
  -7  -7   2    1.01    0.23
  -7   7   2    0.65    0.20
   7   7  -2    0.79    0.21
  -6  -7   2    0.16    0.16
  -6  -7   2    0.02    0.05
   6  -7  -2    0.14    0.13
  -6   7   2   -0.07    0.13
   6   7  -2   -0.10    0.15
  -5  -7   2    1.92    0.15
  -5  -7   2    2.29    0.27
   5  -7  -2    2.30    0.18
  -5  -7   2    2.54    0.16
  -5   7   2    1.98    0.21
   5   7  -2    2.45    0.22
  -4  -7   2    0.02    0.14
   4  -7  -2    0.02    0.08
  -4  -7   2    0.11    0.14
  -4   7   2    0.15    0.11
   4   7  -2    0.15    0.11
   4   7  -2    0.30    0.10
  -4   7   2    0.24    0.11
  -3  -7   2    8.07    0.42
  -3  -7   2    8.65    0.40
   3   7  -2    8.67    0.31
   3   7  -2    8.96    0.32
  -3   7   2    8.79    0.33
  -3   7   2    8.61    0.33
  -2  -7   2    6.38    0.36
  -2  -7   2    6.48    0.34
   2   7  -2    6.20    0.22
  -2   7   2    6.39    0.25
   2   7  -2    6.64    0.23
  -2   7   2    5.94    0.24
  -1  -7   2   -0.06    0.12
  -1  -7   2    0.11    0.13
   1  -7  -2    0.22    0.13
  -1   7   2    0.10    0.06
  -1   7   2    0.07    0.05
   0  -7   2    2.38    0.23
   0  -7   2    2.23    0.24
   0  -7  -2    2.25    0.22
   0   7   2    1.94    0.11
   0   7   2    2.02    0.10
   1  -7   2    2.20    0.24
  -1  -7  -2    1.94    0.21
   1  -7   2    2.30    0.24
  -1   7  -2    2.01    0.11
   1   7   2    1.88    0.12
  -1   7  -2    1.97    0.11
   1   7   2    1.76    0.12
   2  -7   2   14.29    0.55
  -2  -7  -2   14.70    0.51
   2  -7   2   14.17    0.56
  -2   7  -2   14.70    0.44
  -2   7  -2   15.08    0.44
   2   7   2   14.83    0.44
   2   7   2   15.15    0.43
   3  -7   2   19.55    0.67
  -3  -7  -2   18.24    0.61
  -3   7  -2   18.50    0.57
  -3   7  -2   19.92    0.57
   3   7   2   18.30    0.56
   3   7   2   19.36    0.56
   4  -7   2   14.03    0.54
  -4  -7  -2   13.50    0.52
   4  -7   2   14.44    0.42
   4   7   2   14.70    0.48
   4   7   2   14.07    0.48
  -4   7  -2   14.25    0.49
  -4   7  -2   14.04    0.49
   5  -7   2   23.85    0.78
  -5  -7  -2   23.34    0.65
  -5  -7  -2   22.85    0.76
  -5   7  -2   24.59    0.75
   5   7   2   23.38    0.74
  -6  -7  -2    0.24    0.10
   6  -7   2    0.36    0.13
  -6  -7  -2    0.26    0.16
   6  -7   2    0.10    0.14
  -6   7  -2    0.44    0.16
   6   7   2    0.13    0.15
   7  -7   2    0.03    0.13
  -7  -7  -2   -0.19    0.15
   7  -7   2   -0.10    0.13
  -7   7  -2   -0.05    0.17
   7   7   2   -0.06    0.17
   8  -7   2    0.38    0.16
  -8   7  -2    0.28    0.19
   8   7   2    0.24    0.19
   9   7   2   -0.04    0.19
  -9   7  -2    0.06    0.19
 -10   7  -2   -0.47    0.16
  10   7   2    0.21    0.21
 -11   7  -2    0.00    0.23
  11   7   2    0.16    0.24
  12   7   2    1.29    0.33
 -12   7  -2    0.69    0.28
 -12   8   2    0.80    0.28
  12   8  -2    0.56    0.28
 -11   8   2    0.55    0.26
  11   8  -2    0.56    0.27
 -10  -8   2    0.46    0.23
 -10   8   2    0.22    0.22
  10   8  -2    0.32    0.23
  -9  -8   2    0.42    0.23
   9   8  -2    0.42    0.21
  -9   8   2    0.37    0.21
  -8  -8   2    1.66    0.29
   8   8  -2    1.38    0.26
  -8   8   2    1.82    0.28
  -7  -8   2    0.17    0.19
   7   8  -2   -0.01    0.17
  -7   8   2    0.29    0.17
  -6  -8   2    6.86    0.40
   6   8  -2    6.50    0.38
  -6   8   2    5.77    0.36
  -5  -8   2    0.64    0.21
  -5   8   2    1.37    0.19
   5   8  -2    1.39    0.19
  -4  -8   2    0.23    0.16
  -4   8   2    0.13    0.12
  -4   8   2    0.09    0.11
   4   8  -2   -0.12    0.11
   4   8  -2    0.20    0.10
  -3  -8   2    2.00    0.25
  -3  -8   2    2.27    0.28
  -3   8   2    1.88    0.17
   3   8  -2    1.96    0.16
   3   8  -2    2.27    0.18
  -3   8   2    2.13    0.18
  -2  -8   2    0.39    0.16
  -2  -8   2    0.20    0.16
   2   8  -2    0.41    0.08
  -2   8   2    0.60    0.10
   2   8  -2    0.45    0.07
  -2   8   2    0.61    0.10
   1  -8  -2    9.59    0.42
  -1  -8   2    9.49    0.47
  -1  -8   2    9.10    0.43
  -1   8   2    9.52    0.29
  -1   8   2    9.03    0.29
   0  -8   2    0.46    0.16
   0  -8  -2    0.23    0.15
   0  -8   2    0.30    0.16
   0   8   2    0.34    0.06
   0   8   2    0.40    0.06
  -1  -8  -2    2.45    0.25
   1  -8   2    2.52    0.27
   1  -8   2    2.81    0.28
  -1   8  -2    2.74    0.13
   1   8   2    2.62    0.14
   1   8   2    2.61    0.14
  -1   8  -2    2.56    0.13
   2  -8   2    7.57    0.43
  -2  -8  -2    7.03    0.36
   2  -8   2    7.15    0.41
   2   8   2    7.41    0.27
  -2   8  -2    7.40    0.28
  -2   8  -2    7.52    0.27
   2   8   2    7.43    0.27
  -3  -8  -2    0.16    0.14
   3  -8   2   -0.03    0.13
   3   8   2   -0.08    0.08
  -3   8  -2    0.07    0.10
  -3   8  -2    0.19    0.09
   3   8   2    0.08    0.10
  -4  -8  -2    0.10    0.15
   4  -8   2    0.16    0.15
   4   8   2   -0.08    0.09
  -4   8  -2   -0.11    0.11
  -4   8  -2    0.11    0.10
   4   8   2   -0.03    0.10
   5  -8   2    6.17    0.38
  -5  -8  -2    5.55    0.35
   5   8   2    5.57    0.34
  -5   8  -2    5.97    0.33
   6  -8   2    0.26    0.16
  -6  -8  -2    0.18    0.17
   6   8   2    0.10    0.16
  -6   8  -2    0.16    0.16
  -7  -8  -2    5.44    0.37
   7  -8   2    5.26    0.35
  -7   8  -2    5.42    0.39
   7   8   2    5.49    0.40
  -8  -8  -2    1.14    0.23
   8  -8   2    0.95    0.20
  -8   8  -2    1.07    0.24
   8   8   2    1.03    0.23
  -9  -8  -2    0.20    0.18
   9   8   2    0.08    0.22
  -9   8  -2    0.44    0.20
 -10  -8  -2   -0.14    0.18
 -10   8  -2   -0.02    0.19
  10   8   2   -0.17    0.21
 -11  -8  -2   -0.03    0.20
 -11   8  -2    0.23    0.24
  11   8   2    0.09    0.24
  12   8   2   -0.27    0.25
 -12   8  -2   -0.02    0.25
 -12  -9   2    0.23    0.25
  12   9  -2    0.02    0.25
 -12   9   2   -0.04    0.25
 -11  -9   2   -0.28    0.19
 -11   9   2    0.11    0.24
  11   9  -2    0.39    0.25
 -10  -9   2   -0.02    0.21
  10   9  -2   -0.11    0.21
 -10   9   2    0.44    0.24
  -9  -9   2    0.57    0.24
  -9   9   2    0.73    0.24
   9   9  -2    0.27    0.23
  -8  -9   2    1.41    0.28
  -8   9   2    0.86    0.23
   8   9  -2    0.93    0.23
  -7  -9   2    0.74    0.23
   7   9  -2    0.17    0.18
  -7   9   2    0.64    0.19
  -6  -9   2    1.16    0.24
  -6   9   2    0.78    0.18
   6   9  -2    0.72    0.18
  -5  -9   2   12.03    0.55
   5   9  -2   12.38    0.48
  -5   9   2   11.49    0.48
  -4  -9   2   -0.11    0.17
  -4   9   2   -0.15    0.11
   4   9  -2    0.06    0.11
  -3  -9   2   22.05    0.77
  -3  -9   2   21.11    0.81
  -3   9   2   22.09    0.65
  -3   9   2   21.77    0.64
   3   9  -2   21.86    0.62
   3   9  -2   21.32    0.61
  -2  -9   2    5.80    0.36
  -2  -9   2    5.14    0.38
   2   9  -2    5.50    0.21
  -2   9   2    5.25    0.24
   2   9  -2    5.45    0.20
  -2   9   2    5.39    0.24
  -1  -9   2    1.37    0.24
  -1  -9   2    1.66    0.24
   1  -9  -2    1.77    0.24
  -1   9   2    1.60    0.12
  -1   9   2    1.84    0.13
   0  -9   2    1.51    0.24
   0  -9   2    2.02    0.28
   0  -9  -2    2.02    0.24
   0   9   2    1.45    0.12
   0   9   2    1.81    0.10
   1  -9   2    2.63    0.30
   1  -9   2    2.32    0.28
  -1  -9  -2    2.53    0.27
  -1   9  -2    2.65    0.14
   1   9   2    2.73    0.15
  -1   9  -2    2.53    0.13
   1   9   2    2.75    0.15
   2  -9   2    0.30    0.18
   2  -9   2    0.20    0.19
  -2  -9  -2    0.35    0.17
  -2   9  -2    0.18    0.09
   2   9   2    0.25    0.09
  -2   9  -2    0.19    0.08
   2   9   2    0.15    0.08
   3  -9   2    3.77    0.34
  -3  -9  -2    2.78    0.28
  -3   9  -2    3.13    0.22
  -3   9  -2    3.11    0.22
   3   9   2    3.68    0.21
   3   9   2    2.74    0.21
  -4  -9  -2    5.86    0.35
   4  -9   2    5.57    0.38
  -4   9  -2    6.31    0.32
   4   9   2    5.95    0.30
  -5  -9  -2    2.02    0.26
   5  -9   2    2.00    0.27
   5   9   2    2.24    0.23
  -5   9  -2    2.13    0.23
   6  -9   2    3.31    0.32
  -6  -9  -2    3.26    0.32
   6   9   2    3.44    0.30
  -6   9  -2    3.57    0.31
  -7  -9  -2    0.30    0.18
   7  -9   2    0.15    0.16
  -7   9  -2    0.35    0.19
   7   9   2    0.06    0.17
   8  -9   2    1.74    0.25
  -8  -9  -2    1.58    0.26
  -8   9  -2    1.85    0.28
   8   9   2    1.33    0.25
  -9  -9  -2   -0.06    0.17
  -9   9  -2   -0.22    0.17
   9   9   2    0.12    0.20
 -10  -9  -2    0.12    0.21
  10   9   2   -0.01    0.23
 -10   9  -2    0.07    0.21
 -11  -9  -2    0.84    0.26
 -11   9  -2    0.22    0.26
  11   9   2    0.73    0.27
 -12   9  -2    0.11    0.27
 -11 -10   2   -0.16    0.21
 -11  10   2   -0.09    0.21
  11  10  -2    0.05    0.24
 -10 -10   2   -0.01    0.22
 -10  10   2    0.56    0.25
  10  10  -2    0.16    0.24
  -9 -10   2    0.44    0.23
   9  10  -2    0.65    0.24
  -9  10   2    0.12    0.21
  -8 -10   2    2.19    0.31
  -8  10   2    1.97    0.29
   8  10  -2    2.48    0.31
  -7 -10   2    0.38    0.21
   7  10  -2    0.47    0.19
  -7  10   2    0.30    0.19
  -6 -10   2    0.89    0.25
   6  10  -2    0.91    0.19
  -6  10   2    0.93    0.20
  -5 -10   2    0.08    0.17
   5  10  -2    0.00    0.13
  -5  10   2   -0.16    0.12
  -4 -10   2   -0.08    0.17
   4  10  -2    0.06    0.11
  -4  10   2    0.05    0.12
  -3 -10   2    0.34    0.19
  -3  10   2    0.61    0.13
   3  10  -2    0.55    0.11
  -2 -10   2    6.58    0.45
  -2 -10   2    7.78    0.45
   2  10  -2    6.89    0.25
  -2  10   2    6.97    0.28
   2  10  -2    6.57    0.24
  -2  10   2    7.10    0.27
   1 -10  -2    0.41    0.21
  -1 -10   2    1.36    0.23
  -1 -10   2    0.32    0.20
  -1  10   2    0.61    0.09
  -1  10   2    0.68    0.09
   0 -10  -2    0.90    0.21
   0 -10   2    1.21    0.25
   0 -10   2    1.09    0.25
   0  10   2    1.25    0.10
   0  10   2    1.21    0.09
   1 -10   2    0.05    0.19
  -1 -10  -2   -0.03    0.16
   1 -10   2   -0.01    0.19
   1  10   2    0.05    0.07
  -1  10  -2    0.04    0.06
   1  10   2   -0.05    0.07
  -1  10  -2   -0.02    0.06
   2 -10   2    0.05    0.18
   2 -10   2    0.26    0.19
  -2 -10  -2    0.14    0.17
  -2  10  -2    0.03    0.08
   2  10   2    0.01    0.08
  -2  10  -2    0.03    0.08
   2  10   2    0.13    0.08
  -3 -10  -2    0.79    0.21
   3 -10   2    1.21    0.25
   3  10   2    1.15    0.14
  -3  10  -2    0.97    0.15
  -4 -10  -2    1.14    0.22
   4 -10   2    1.15    0.24
  -4  10  -2    1.27    0.17
   4  10   2    1.11    0.16
   5 -10   2   -0.05    0.16
  -5 -10  -2    0.18    0.17
  -5  10  -2   -0.15    0.12
   5  10   2    0.10    0.14
   6 -10   2    0.01    0.18
  -6 -10  -2    0.15    0.18
  -6  10  -2   -0.30    0.14
   6  10   2    0.04    0.15
  -7 -10  -2    0.46    0.20
   7 -10   2    0.85    0.22
   7  10   2    0.30    0.18
  -7  10  -2    0.44    0.19
  -8 -10  -2    0.62    0.22
   8 -10   2    0.37    0.20
   8  10   2    0.69    0.21
  -8  10  -2    0.09    0.18
  -9 -10  -2    0.71    0.24
   9  10   2    0.58    0.25
  -9  10  -2    0.16    0.21
 -10 -10  -2    0.87    0.25
  10  10   2    0.86    0.27
 -10  10  -2    0.73    0.27
 -11 -10  -2    0.49    0.25
 -11  10  -2    0.29    0.25
  11  10   2    0.56    0.27
 -10 -11   2    0.05    0.23
 -10  11   2   -0.07    0.22
  10  11  -2   -0.01    0.23
  -9 -11   2    0.18    0.25
  -9  11   2    0.76    0.26
   9  11  -2    0.95    0.26
  -8 -11   2   -0.32    0.19
  -8  11   2    0.21    0.20
   8  11  -2    0.01    0.19
  -7 -11   2   -0.05    0.18
   7  11  -2    0.01    0.17
  -7  11   2   -0.20    0.16
  -6 -11   2   -0.10    0.19
  -6  11   2    0.20    0.16
   6  11  -2    0.16    0.16
  -5 -11   2    0.30    0.22
   5  11  -2    0.29    0.15
  -5  11   2    0.50    0.16
  -4 -11   2    2.45    0.33
  -4  11   2    2.53    0.23
   4  11  -2    2.75    0.22
  -3 -11   2    0.82    0.23
  -3  11   2    0.52    0.13
   3  11  -2    0.65    0.12
  -2 -11   2    7.62    0.47
   2  11  -2    8.14    0.27
  -2  11   2    7.93    0.30
  -1 -11   2    0.28    0.21
  -1 -11   2    0.34    0.20
  -1  11   2    0.38    0.08
   0 -11  -2    0.59    0.20
   0 -11   2    0.51    0.21
   0 -11   2    0.96    0.25
   0  11   2    0.87    0.09
   0  11   2    1.04    0.09
   1 -11   2    0.29    0.21
   1 -11   2    0.61    0.24
  -1 -11  -2    0.35    0.20
  -1  11  -2    0.58    0.08
   1  11   2    0.48    0.09
  -1  11  -2    0.62    0.08
   2 -11   2    3.71    0.38
  -2 -11  -2    3.90    0.36
   2  11   2    3.65    0.21
  -2  11  -2    4.00    0.20
  -3 -11  -2    0.22    0.18
   3 -11   2    0.46    0.23
   3  11   2    0.17    0.11
  -3  11  -2    0.14    0.11
   4 -11   2    0.04    0.19
  -4 -11  -2   -0.09    0.16
  -4  11  -2   -0.07    0.12
   4  11   2   -0.19    0.11
   5 -11   2    0.23    0.20
  -5 -11  -2    0.23    0.18
  -5  11  -2    0.14    0.15
   5  11   2    0.16    0.14
  -6 -11  -2    0.12    0.19
   6 -11   2    0.17    0.20
   6  11   2    0.12    0.15
  -6  11  -2    0.33    0.18
   7 -11   2    1.11    0.26
  -7 -11  -2    0.92    0.25
  -7  11  -2    1.59    0.26
   7  11   2    1.51    0.24
  -8 -11  -2    0.11    0.20
  -8  11  -2    0.44    0.21
   8  11   2   -0.06    0.19
  -9 -11  -2    1.63    0.29
   9  11   2    1.05    0.27
  -9  11  -2    1.40    0.28
 -10 -11  -2    0.02    0.22
  10  11   2   -0.18    0.22
 -10  11  -2   -0.20    0.21
  -9 -12   2   -0.11    0.22
   9  12  -2   -0.19    0.21
  -9  12   2    0.08    0.21
  -8 -12   2    0.13    0.24
  -8  12   2    0.03    0.20
   8  12  -2    0.04    0.19
  -7 -12   2    0.38    0.24
   7  12  -2    0.23    0.18
  -7  12   2    0.37    0.19
  -6 -12   2    0.80    0.25
  -6  12   2    0.51    0.19
   6  12  -2    0.88    0.19
  -5 -12   2    0.56    0.23
  -5  12   2    0.67    0.17
   5  12  -2    0.66    0.17
  -4 -12   2    0.77    0.23
   4  12  -2    0.62    0.14
  -4  12   2    0.65    0.16
  -3 -12   2    1.04    0.26
  -3  12   2    0.73    0.14
   3  12  -2    0.82    0.12
  -2 -12   2    2.32    0.32
   2  12  -2    2.21    0.14
  -2  12   2    1.70    0.16
  -1 -12   2    0.66    0.24
  -1  12   2    0.36    0.09
   0 -12   2    0.10    0.21
   0 -12   2    0.05    0.19
   0 -12  -2    0.13    0.19
   1 -12   2   -0.08    0.20
  -1 -12  -2   -0.28    0.15
   1 -12   2    0.29    0.22
  -1  12  -2   -0.11    0.06
   1  12   2   -0.06    0.07
   2 -12   2    0.36    0.22
  -2 -12  -2    0.59    0.22
  -2  12  -2    0.34    0.10
   2  12   2    0.32    0.10
  -3 -12  -2    0.09    0.17
   3 -12   2   -0.13    0.20
  -3  12  -2   -0.07    0.10
   3  12   2    0.09    0.11
  -4 -12  -2    0.08    0.19
   4 -12   2   -0.22    0.20
  -4  12  -2   -0.11    0.12
   4  12   2   -0.07    0.11
  -5 -12  -2   -0.09    0.18
   5 -12   2   -0.27    0.19
  -5  12  -2   -0.07    0.14
   5  12   2   -0.03    0.13
  -6 -12  -2   -0.07    0.18
   6  12   2    0.34    0.17
  -6  12  -2    0.19    0.17
  -7 -12  -2    0.21    0.21
   7  12   2    0.35    0.20
  -7  12  -2    0.63    0.21
  -8 -12  -2    0.88    0.26
  -8  12  -2    0.51    0.23
   8  12   2    0.50    0.23
  -9 -12  -2    1.16    0.29
  -9  12  -2    0.57    0.25
   9  12   2    0.73    0.25
  -8 -13   2   -0.04    0.24
   8  13  -2    0.41    0.22
  -8  13   2    0.11    0.20
  -7 -13   2    0.27    0.25
  -7  13   2    0.44    0.20
   7  13  -2    0.26    0.19
  -6 -13   2    0.63    0.25
   6  13  -2    0.90    0.20
  -6  13   2    0.87    0.21
  -5 -13   2    0.61    0.26
  -5  13   2    1.15    0.20
   5  13  -2    0.86    0.18
  -4 -13   2   -0.01    0.22
  -4  13   2    0.40    0.15
   4  13  -2    0.45    0.13
  -3 -13   2    1.40    0.31
  -3  13   2    1.37    0.17
   3  13  -2    1.68    0.15
  -2 -13   2    0.36    0.22
  -2  13   2    0.03    0.10
  -1 -13   2    1.92    0.32
  -1  13   2    1.94    0.15
  -1  13   2    2.09    0.14
   0 -13  -2    3.71    0.39
   0 -13   2    4.16    0.42
  -1 -13  -2    2.39    0.33
   1 -13   2    3.02    0.38
  -2 -13  -2   -0.26    0.17
   2  13   2   -0.01    0.09
  -2  13  -2    0.16    0.09
  -3 -13  -2    1.95    0.30
   3  13   2    1.75    0.17
  -3  13  -2    1.72    0.17
  -4 -13  -2   -0.02    0.19
  -4  13  -2   -0.01    0.13
   4  13   2   -0.11    0.12
  -5 -13  -2    0.78    0.25
   5  13   2    0.82    0.17
  -5  13  -2    0.66    0.18
  -6 -13  -2   -0.02    0.20
   6  13   2    0.33    0.17
  -6  13  -2   -0.21    0.16
  -7 -13  -2    0.23    0.23
  -7  13  -2   -0.20    0.18
   7  13   2    0.00    0.18
  -8 -13  -2    1.52    0.31
   8  13   2    1.01    0.26
  -8  13  -2    1.60    0.29
  -7 -14   2    0.27    0.26
  -7  14   2    0.57    0.22
   7  14  -2    0.53    0.22
  -6 -14   2    0.34    0.25
   6  14  -2   -0.10    0.16
  -6  14   2   -0.21    0.16
  -5 -14   2    0.19    0.25
   5  14  -2   -0.04    0.14
  -5  14   2    0.17    0.16
  -4 -14   2    0.06    0.24
   4  14  -2    0.00    0.12
  -4  14   2   -0.14    0.13
  -3 -14   2    0.56    0.27
  -3  14   2    0.48    0.14
  -2 -14   2    0.05    0.23
  -2  14   2    0.12    0.10
  -1 -14   2    2.86    0.40
   0 -14   2    0.05    0.21
  -1 -14  -2    0.22    0.23
   1 -14   2   -0.16    0.22
  -2 -14  -2    0.07    0.19
  -2  14  -2   -0.10    0.08
  -3 -14  -2    0.00    0.20
  -3  14  -2   -0.08    0.11
   3  14   2    0.21    0.12
  -4 -14  -2    0.08    0.22
  -4  14  -2    0.12    0.14
   4  14   2    0.41    0.14
  -5 -14  -2   -0.02    0.21
  -5  14  -2    0.28    0.17
   5  14   2    0.04    0.15
  -6 -14  -2    0.18    0.23
   6  14   2    0.05    0.16
  -6  14  -2    0.03    0.17
  -7 -14  -2    0.31    0.25
  -7  14  -2    0.45    0.21
   7  14   2    0.39    0.20
  -5 -15   2    0.55    0.29
  -5  15   2    0.17    0.17
  -4 -15   2    0.45    0.28
  -4  15   2    0.29    0.15
  -3 -15   2    0.28    0.27
  -2 -15   2    0.26    0.26
  -1 -15   2    0.35    0.26
   0 -15   2    0.28    0.23
  -1 -15  -2    0.79    0.28
  -2 -15  -2   -0.11    0.22
  -3 -15  -2    0.50    0.26
  -4 -15  -2   -0.05    0.22
  -4  15  -2    0.05    0.14
  -5 -15  -2    1.14    0.30
   5  15   2    0.58    0.18
  -5  15  -2    0.53    0.18
  -3 -16   2   -0.21    0.25
  -2 -16   2    0.88    0.32
  -1 -16   2   -0.13    0.25
   0 -16   2   -0.11    0.26
  -2 -16  -2    0.74    0.28
  14   0  -3   -0.19    0.23
 -14   0   3   -0.03    0.22
 -13   0   3    0.13    0.23
  13   0  -3   -0.07    0.25
 -12   0   3    0.18    0.21
  12   0  -3   -0.11    0.23
  11   0  -3    0.51    0.22
 -11   0   3    0.76    0.23
 -10   0   3   -0.06    0.18
  10   0  -3    0.21    0.22
   9   0  -3    5.20    0.42
  -9   0   3    5.67    0.42
   8   0  -3   -0.11    0.15
  -8   0   3   -0.16    0.13
  -7   0   3    4.99    0.35
   7   0  -3    5.48    0.34
  -6   0   3   -0.09    0.11
   6   0  -3   -0.10    0.13
   5   0  -3   11.50    0.45
  -5   0   3   12.19    0.45
   4   0  -3    0.01    0.11
  -4   0   3   -0.05    0.04
  -4   0   3   -0.06    0.09
   3   0  -3   66.45    1.69
  -3   0   3   69.22    1.70
   2   0  -3   -0.18    0.07
  -2   0   3   -0.19    0.07
   1   0  -3  131.85    3.13
   0   0   3   -0.09    0.04
   0   0   3   -0.09    0.03
   0   0  -3   -0.09    0.03
   0   0  -3   -0.04    0.04
  -1   0  -3   13.97    0.36
   1   0   3   12.10    0.36
  -1   0  -3   11.14    0.36
  -2   0  -3   -0.09    0.07
   2   0   3   -0.12    0.08
   3   0   3   77.74    1.95
  -3   0  -3   79.68    1.95
   4   0   3   -0.07    0.09
  -4   0  -3    0.03    0.10
   5   0   3    8.45    0.37
  -5   0  -3    8.37    0.36
  -6   0  -3    0.09    0.12
   6   0   3   -0.02    0.11
   7   0   3    1.38    0.21
  -7   0  -3    1.10    0.19
  -8   0  -3   -0.19    0.13
   8   0   3   -0.18    0.15
   9   0   3    5.81    0.42
  -9   0  -3    6.83    0.45
 -10   0  -3    0.01    0.19
  10   0   3    0.01    0.20
  11   0   3    0.06    0.21
 -11   0  -3   -0.06    0.18
  12   0   3    0.15    0.23
 -12   0  -3    0.09    0.23
  13   0   3    0.35    0.28
 -13   0  -3    0.10    0.24
  14   0   3   -0.07    0.28
 -14   0  -3   -0.58    0.22
  14  -1  -3    0.60    0.31
 -14  -1   3    0.01    0.22
  14   1  -3    0.73    0.32
 -14   1   3    0.74    0.29
  13  -1  -3    0.02    0.26
 -13  -1   3    0.14    0.23
 -13   1   3   -0.06    0.23
  13   1  -3    0.19    0.25
  12  -1  -3    0.15    0.22
 -12  -1   3    0.26    0.21
  12   1  -3    0.45    0.26
 -12   1   3    0.52    0.25
 -11  -1   3    0.66    0.24
  11  -1  -3    1.47    0.30
  11   1  -3    0.67    0.25
 -11   1   3    0.65    0.24
 -10  -1   3   -0.11    0.15
  10  -1  -3   -0.09    0.20
 -10   1   3    0.28    0.19
  10   1  -3    0.15    0.20
   9  -1  -3    0.18    0.20
  -9  -1   3    0.44    0.19
  -9   1   3    0.20    0.20
   9   1  -3    0.02    0.18
  -8  -1   3    3.77    0.33
   8  -1  -3    3.50    0.33
  -8   1   3    3.04    0.30
   8   1  -3    2.97    0.31
   7  -1  -3    1.58    0.23
  -7  -1   3    1.99    0.23
   7   1  -3    1.61    0.23
  -7   1   3    1.93    0.23
  -6  -1   3    3.09    0.26
   6  -1  -3    3.23    0.26
   6   1  -3    2.84    0.26
  -6   1   3    3.36    0.28
   5  -1  -3   57.78    1.56
  -5  -1   3   61.21    1.56
   5   1  -3   58.69    1.56
  -5   1   3   59.88    1.56
  -4  -1   3   71.56    1.80
  -4  -1   3   71.51    1.74
   4  -1  -3   71.49    1.80
   4   1  -3   70.13    1.80
  -4   1   3   70.50    1.80
  -3  -1   3    5.32    0.20
  -3  -1   3    5.41    0.24
   3  -1  -3    5.70    0.26
   3   1  -3    5.09    0.24
  -3   1   3    6.06    0.25
  -2  -1   3   52.25    1.28
   2  -1  -3   50.53    1.28
  -2  -1   3   52.26    1.28
   2   1  -3   51.01    1.28
   2   1  -3   50.31    1.28
  -2   1   3   51.18    1.28
   1  -1  -3  111.53    2.41
  -1  -1   3  110.59    2.41
  -1  -1   3  108.26    2.40
   1   1  -3   91.74    2.40
  -1   1   3   81.68    2.40
   0  -1  -3   34.47    0.91
   0  -1   3   38.98    0.92
   1  -1   3  168.47    3.76
  -1  -1  -3  168.22    3.75
  -1   1  -3  158.25    3.75
   1   1   3  154.26    3.76
  -1   1  -3  143.48    3.75
  -2  -1  -3    5.50    0.22
   2  -1   3    5.45    0.22
   2   1   3    5.48    0.23
  -2   1  -3    5.46    0.23
  -3  -1  -3    2.19    0.16
   3  -1   3    1.85    0.16
   3   1   3    1.85    0.16
  -3   1  -3    1.84    0.16
   4  -1   3    5.52    0.27
  -4  -1  -3    5.29    0.26
   4   1   3    5.42    0.27
  -4   1  -3    5.03    0.27
  -5  -1  -3    3.41    0.25
   5  -1   3    3.57    0.25
   5   1   3    3.28    0.26
  -5   1  -3    2.97    0.23
  -6  -1  -3    0.67    0.15
   6  -1   3    0.46    0.15
  -6   1  -3    0.53    0.15
   6   1   3    0.64    0.16
   7  -1   3    3.65    0.31
  -7  -1  -3    3.71    0.30
   7   1   3    3.28    0.30
  -7   1  -3    4.11    0.33
  -8  -1  -3   -0.09    0.14
   8  -1   3    0.45    0.18
   8   1   3   -0.04    0.15
  -8   1  -3    0.20    0.16
  -9  -1  -3    0.02    0.16
   9  -1   3   -0.16    0.18
   9   1   3   -0.24    0.19
  -9   1  -3    0.20    0.19
 -10  -1  -3   -0.02    0.18
  10  -1   3    0.26    0.20
 -10   1  -3   -0.30    0.15
  10   1   3    0.01    0.19
  11  -1   3    2.68    0.38
 -11  -1  -3    2.24    0.33
  11   1   3    2.58    0.37
 -11   1  -3    2.44    0.34
 -12  -1  -3    1.84    0.33
  12  -1   3    0.78    0.30
 -12   1  -3    1.59    0.33
  12   1   3    1.42    0.34
 -13  -1  -3    0.37    0.26
  13  -1   3    0.18    0.27
  13   1   3    0.31    0.26
 -13   1  -3    0.33    0.24
 -14  -1  -3    0.39    0.27
  14  -1   3    0.30    0.30
 -14   1  -3    0.66    0.31
  14   1   3    0.73    0.34
 -14  -2   3    0.76    0.30
  14  -2  -3    1.28    0.36
  14   2  -3    0.84    0.34
 -14   2   3    0.88    0.30
 -13  -2   3    0.27    0.24
  13  -2  -3   -0.06    0.25
  13   2  -3    0.11    0.24
 -13   2   3    0.13    0.23
  12  -2  -3    0.51    0.25
 -12  -2   3    0.22    0.21
  12   2  -3    0.11    0.26
 -12   2   3    0.13    0.23
  11  -2  -3   -0.13    0.21
 -11  -2   3    0.12    0.19
 -11   2   3    0.07    0.21
  11   2  -3    0.23    0.23
  10  -2  -3    0.36    0.20
 -10  -2   3    0.26    0.19
  10   2  -3    0.63    0.24
 -10   2   3    0.43    0.22
   9  -2  -3    0.25    0.21
  -9  -2   3    0.14    0.16
   9   2  -3    0.08    0.19
  -9   2   3    0.25    0.19
   8  -2  -3    0.13    0.17
  -8  -2   3   -0.35    0.12
   8   2  -3   -0.08    0.17
  -8   2   3   -0.04    0.15
  -7  -2   3    5.99    0.35
   7  -2  -3    6.08    0.36
  -7   2   3    6.67    0.39
   7   2  -3    6.56    0.37
  -6  -2   3   20.68    0.71
   6  -2  -3   22.99    0.72
   6   2  -3   23.21    0.73
  -6   2   3   22.16    0.72
  -5  -2   3   49.78    1.27
   5  -2  -3   49.85    1.34
  -5  -2   3   51.95    1.34
   5   2  -3   50.05    1.27
  -5   2   3   49.50    1.34
   5   2  -3   49.66    1.34
  -5   2   3   49.08    1.21
   4  -2  -3   -0.18    0.09
  -4  -2   3    0.10    0.08
  -4  -2   3   -0.02    0.09
   4   2  -3    0.08    0.07
  -4   2   3    0.00    0.05
  -4   2   3    0.11    0.11
   4   2  -3   -0.05    0.10
   3  -2  -3    5.05    0.23
  -3  -2   3    4.72    0.21
  -3  -2   3    4.42    0.22
   3   2  -3    4.80    0.22
  -3   2   3    4.70    0.22
   3   2  -3    4.59    0.23
  -2  -2   3    0.43    0.09
  -2  -2   3    0.27    0.08
   2  -2  -3    0.26    0.09
  -2   2   3    0.21    0.09
   2   2  -3    0.28    0.09
   2   2  -3    0.26    0.08
   2   2  -3    0.30    0.09
  -2   2   3    0.34    0.09
  -1  -2   3   59.68    1.47
   1  -2  -3   58.79    1.45
  -1  -2   3   60.30    1.51
  -1  -2   3   60.02    1.45
   1   2  -3   59.64    1.45
   1   2  -3   60.53    1.46
  -1   2   3   59.50    1.46
  -1   2   3   60.74    1.46
   1   2  -3   59.75    1.45
   0  -2   3  451.18   11.10
   0  -2  -3  463.28   10.79
   0  -2   3  457.90   10.87
   0  -2   3  457.38   10.86
   0   2   3  453.03   10.76
   0   2  -3  461.14   10.90
   0   2   3  462.13   10.88
   0   2   3  447.17   10.66
   0   2  -3  454.54   10.81
  -1  -2  -3  675.37   16.30
   1  -2   3  679.62   16.18
  -1  -2  -3  696.05   16.05
   1  -2   3  701.26   16.36
  -1   2  -3  686.67   16.31
   1   2   3  685.42   16.28
   1   2   3  684.17   16.37
  -1   2  -3  698.05   16.35
  -2  -2  -3   -0.05    0.07
   2  -2   3    0.00    0.08
  -2   2  -3    0.02    0.08
   2   2   3    0.01    0.07
   2   2   3   -0.05    0.08
  -2   2  -3   -0.06    0.07
  -3  -2  -3   46.40    1.19
   3  -2   3   45.02    1.19
  -3   2  -3   46.95    1.20
   3   2   3   46.57    1.20
   4  -2   3    0.60    0.13
  -4  -2  -3    0.65    0.12
  -4   2  -3    0.94    0.14
   4   2   3    0.66    0.13
   5  -2   3    3.36    0.26
  -5  -2  -3    3.43    0.23
  -5   2  -3    2.98    0.24
   5   2   3    3.20    0.24
  -6  -2  -3    2.14    0.22
   6  -2   3    1.76    0.21
   6   2   3    1.46    0.20
  -6   2  -3    1.48    0.19
   7  -2   3    3.02    0.28
  -7  -2  -3    2.62    0.25
  -7   2  -3    2.47    0.26
   7   2   3    2.92    0.29
  -8  -2  -3    6.98    0.39
   8  -2   3    6.47    0.43
   8  -2   3    5.89    0.27
   8   2   3    6.43    0.43
  -8   2  -3    6.13    0.42
   9  -2   3    2.57    0.18
  -9  -2  -3    2.34    0.30
   9  -2   3    2.38    0.31
   9   2   3    1.97    0.31
  -9   2  -3    2.99    0.33
 -10  -2  -3    0.17    0.19
  10  -2   3    0.64    0.23
  10   2   3    0.41    0.22
 -10   2  -3    0.81    0.24
 -11  -2  -3    0.28    0.21
  11  -2   3    0.46    0.22
  11   2   3    0.44    0.24
 -11   2  -3    0.26    0.21
  12  -2   3    1.25    0.32
 -12  -2  -3    1.32    0.29
  12   2   3    1.20    0.31
 -12   2  -3    1.67    0.33
  13  -2   3    0.41    0.29
 -13  -2  -3    0.55    0.27
  13   2   3    0.24    0.28
 -13   2  -3    0.23    0.24
 -14  -2  -3    0.78    0.30
  14  -2   3    0.48    0.31
 -14   2  -3    0.09    0.28
  14   2   3    0.40    0.30
  14  -3  -3    1.09    0.34
  14   3  -3    1.57    0.36
 -14   3   3    1.26    0.33
 -13  -3   3   -0.09    0.18
  13  -3  -3   -0.28    0.23
 -13   3   3   -0.02    0.23
  13   3  -3    0.12    0.25
  12  -3  -3    2.71    0.38
 -12  -3   3    2.58    0.33
 -12   3   3    2.46    0.37
  12   3  -3    2.24    0.38
 -11  -3   3    0.76    0.21
  11  -3  -3    0.49    0.25
  11   3  -3    0.59    0.26
 -11   3   3    0.59    0.23
  10  -3  -3    0.28    0.19
 -10  -3   3    0.34    0.19
  10   3  -3    0.32    0.23
 -10   3   3    0.24    0.19
   9  -3  -3    0.17    0.20
  -9  -3   3   -0.04    0.16
   9   3  -3    0.30    0.22
  -9   3   3    0.01    0.18
   8  -3  -3    6.79    0.43
  -8  -3   3    6.72    0.38
   8   3  -3    7.03    0.42
  -8   3   3    7.54    0.44
  -7  -3   3    0.38    0.15
   7  -3  -3    0.37    0.16
  -7   3   3    0.13    0.15
   7   3  -3    0.36    0.10
   7   3  -3    0.51    0.17
   6  -3  -3    4.05    0.28
  -6  -3   3    3.97    0.26
   6   3  -3    4.88    0.31
  -6   3   3    4.67    0.31
   6   3  -3    4.25    0.23
   5  -3  -3    0.20    0.12
  -5  -3   3    0.02    0.09
  -5  -3   3    0.07    0.10
   5   3  -3    0.03    0.08
  -5   3   3   -0.05    0.10
   5   3  -3   -0.04    0.11
  -5   3   3   -0.06    0.06
  -4  -3   3    3.53    0.21
  -4  -3   3    3.28    0.20
   4  -3  -3    3.13    0.22
  -4   3   3    3.20    0.17
   4   3  -3    3.31    0.21
  -4   3   3    3.62    0.22
   4   3  -3    3.69    0.23
  -3  -3   3    2.10    0.17
   3  -3  -3    2.11    0.17
  -3  -3   3    1.94    0.15
  -3   3   3    2.38    0.18
   3   3  -3    2.08    0.16
  -3   3   3    2.20    0.15
   3   3  -3    2.13    0.17
   3   3  -3    2.16    0.17
  -2  -3   3   65.28    1.62
   2  -3  -3   63.73    1.58
  -2  -3   3   62.68    1.57
  -2  -3   3   66.25    1.66
  -2  -3   3   62.26    1.57
   2   3  -3   65.26    1.59
   2   3  -3   64.94    1.65
  -2   3   3   65.34    1.60
   2   3  -3   65.24    1.59
  -2   3   3   65.76    1.59
   1  -3  -3    7.80    0.25
  -1  -3   3    8.54    0.32
  -1  -3   3    8.21    0.30
   1   3  -3    7.91    0.26
   1   3  -3    8.80    0.32
   1   3  -3    8.32    0.26
  -1   3   3    8.60    0.27
  -1   3   3    8.49    0.27
   0  -3   3   90.48    2.27
   0  -3   3   91.27    2.20
   0  -3  -3   89.90    2.16
   0   3   3   92.48    2.18
   0   3  -3   92.76    2.17
   0   3  -3   90.18    2.16
   0   3   3   90.28    2.17
   0   3   3   89.32    2.17
   0   3  -3   91.72    2.27
  -1  -3  -3    0.23    0.05
   1  -3   3    0.01    0.04
   1  -3   3    0.33    0.10
   1  -3   3    0.25    0.10
  -1  -3  -3    0.12    0.07
  -1   3  -3    0.41    0.08
  -1   3  -3    0.26    0.07
   1   3   3    0.17    0.07
   1   3   3    0.23    0.07
   2  -3   3    0.13    0.08
  -2  -3  -3    0.01    0.07
   2  -3   3   -0.02    0.09
  -2  -3  -3    0.06    0.07
   2   3   3   -0.06    0.07
   2   3   3   -0.08    0.08
  -2   3  -3    0.03    0.07
  -2   3  -3    0.05    0.08
   3  -3   3   16.54    0.50
   3  -3   3   16.79    0.52
  -3  -3  -3   16.70    0.50
  -3   3  -3   17.60    0.52
   3   3   3   16.51    0.52
  -4  -3  -3    4.64    0.25
   4  -3   3    4.23    0.23
   4  -3   3    4.57    0.25
   4   3   3    4.66    0.25
  -4   3  -3    5.10    0.27
  -5  -3  -3    2.46    0.21
   5  -3   3    2.20    0.17
   5  -3   3    2.30    0.21
  -5   3  -3    2.16    0.21
   5   3   3    2.22    0.21
   6  -3   3    0.03    0.09
  -6  -3  -3   -0.10    0.11
   6  -3   3   -0.05    0.13
  -6   3  -3    0.01    0.12
   6   3   3   -0.14    0.13
  -7  -3  -3    3.04    0.27
   7  -3   3    3.18    0.21
   7  -3   3    3.49    0.30
   7   3   3    3.05    0.30
  -7   3  -3    3.02    0.28
  -8  -3  -3    0.60    0.18
   8  -3   3    0.34    0.11
   8  -3   3    0.45    0.18
  -8   3  -3    0.13    0.16
   8   3   3    0.32    0.19
   9  -3   3    8.15    0.32
  -9  -3  -3    8.27    0.48
   9  -3   3    8.07    0.49
  -9   3  -3    8.87    0.48
   9   3   3    7.70    0.47
 -10  -3  -3    3.50    0.36
  10  -3   3    2.88    0.35
 -10   3  -3    2.72    0.35
  10   3   3    2.18    0.33
 -11  -3  -3    1.13    0.26
  11  -3   3    0.89    0.27
  11   3   3    1.04    0.28
 -11   3  -3    1.53    0.30
  12  -3   3    3.40    0.42
 -12  -3  -3    3.36    0.40
  12   3   3    3.46    0.43
 -12   3  -3    3.01    0.41
  13  -3   3   -0.09    0.25
 -13  -3  -3    0.48    0.25
 -13   3  -3    0.12    0.24
  13   3   3    0.54    0.28
  14  -3   3    0.47    0.31
  14   3   3    0.16    0.30
 -14   3  -3   -0.22    0.26
 -14   4   3    0.30    0.26
  13  -4  -3    0.66    0.29
 -13   4   3    0.76    0.29
  13   4  -3    0.42    0.28
  12  -4  -3    2.51    0.37
  12   4  -3    2.86    0.41
 -12   4   3    2.55    0.37
 -11  -4   3    0.80    0.23
  11  -4  -3    0.79    0.24
  11   4  -3    0.42    0.24
 -11   4   3    1.07    0.27
 -10  -4   3    2.01    0.28
  10  -4  -3    1.35    0.26
 -10   4   3    1.69    0.29
  10   4  -3    1.29    0.27
   9  -4  -3    0.17    0.18
  -9  -4   3    0.35    0.18
   9   4  -3    0.46    0.21
  -9   4   3    0.23    0.20
  -8  -4   3    8.19    0.43
   8  -4  -3    9.01    0.48
   8   4  -3    9.37    0.50
  -8   4   3    8.81    0.47
   8   4  -3    8.41    0.37
  -7  -4   3    1.00    0.18
   7  -4  -3    0.87    0.20
   7   4  -3    0.97    0.20
   7   4  -3    0.79    0.15
  -7   4   3    0.57    0.19
   6  -4  -3    3.53    0.28
  -6  -4   3    3.93    0.25
   6   4  -3    3.34    0.23
   6   4  -3    3.19    0.28
  -6   4   3    3.85    0.19
  -6   4   3    3.61    0.29
   5  -4  -3    2.45    0.21
  -5  -4   3    2.26    0.20
  -5  -4   3    2.12    0.19
   5   4  -3    2.67    0.23
  -5   4   3    2.28    0.17
   5   4  -3    2.44    0.20
  -5   4   3    1.95    0.20
  -4  -4   3   13.58    0.48
  -4  -4   3   13.52    0.44
   4  -4  -3   14.11    0.46
  -4   4   3   13.87    0.44
   4   4  -3   13.75    0.48
  -4   4   3   13.58    0.47
   4   4  -3   13.83    0.47
  -3  -4   3    0.06    0.10
  -3  -4   3    0.08    0.10
  -3  -4   3    0.25    0.08
   3  -4  -3    0.04    0.08
  -3   4   3    0.13    0.09
  -3   4   3    0.20    0.09
   3   4  -3    0.00    0.08
   3   4  -3    0.34    0.10
  -3   4   3    0.11    0.09
   3   4  -3    0.16    0.10
   2  -4  -3    1.79    0.13
  -2  -4   3    1.81    0.18
  -2  -4   3    1.73    0.17
  -2   4   3    1.86    0.15
  -2   4   3    1.59    0.15
   2   4  -3    1.98    0.15
  -2   4   3    1.93    0.14
   2   4  -3    1.86    0.13
  -1  -4   3   44.12    1.18
  -1  -4   3   46.00    1.22
  -1   4   3   45.74    1.12
   1   4  -3   45.53    1.11
   1   4  -3   44.93    1.11
   1   4  -3   44.66    1.21
  -1   4   3   45.23    1.12
  -1   4   3   45.26    1.20
   0  -4   3   16.55    0.51
   0  -4   3   16.61    0.54
   0  -4  -3   16.61    0.41
   0  -4  -3   16.44    0.48
   0   4  -3   15.97    0.52
   0   4   3   16.65    0.45
   0   4  -3   16.33    0.43
   0   4  -3   16.74    0.44
   0   4   3   17.27    0.45
   1  -4   3    2.14    0.10
  -1  -4  -3    2.10    0.11
  -1  -4  -3    2.20    0.15
   1  -4   3    2.22    0.18
   1  -4   3    2.00    0.18
  -1   4  -3    2.09    0.13
   1   4   3    2.11    0.14
  -1   4  -3    2.52    0.18
   1   4   3    2.23    0.14
  -1   4  -3    2.36    0.13
   2  -4   3    6.99    0.32
   2  -4   3    7.52    0.32
  -2  -4  -3    7.29    0.27
  -2   4  -3    7.66    0.27
  -2   4  -3    7.34    0.27
   2   4   3    7.34    0.27
   2   4   3    7.03    0.27
   3  -4   3   27.54    0.74
   3  -4   3   27.18    0.79
  -3  -4  -3   27.33    0.74
  -3  -4  -3   26.48    0.73
  -3   4  -3   27.69    0.76
  -3   4  -3   27.37    0.76
   3   4   3   27.95    0.76
   3   4   3   27.06    0.75
  -4  -4  -3    0.08    0.09
   4  -4   3   -0.06    0.09
   4  -4   3   -0.06    0.09
  -4   4  -3    0.13    0.11
   4   4   3   -0.14    0.09
   5  -4   3    7.07    0.33
   5  -4   3    7.41    0.31
  -5  -4  -3    7.12    0.32
   5   4   3    6.53    0.35
  -5   4  -3    7.38    0.35
  -6  -4  -3   -0.09    0.11
   6  -4   3    0.04    0.13
   6  -4   3    0.20    0.11
  -6   4  -3    0.12    0.13
   6   4   3   -0.08    0.12
   7  -4   3    0.51    0.13
  -7  -4  -3    0.61    0.17
   7  -4   3    0.63    0.17
  -7   4  -3    0.55    0.17
   7   4   3    0.57    0.18
  -8  -4  -3    0.26    0.16
   8  -4   3   -0.25    0.16
   8  -4   3   -0.03    0.10
  -8   4  -3    0.16    0.18
   8   4   3   -0.23    0.17
   9  -4   3    0.36    0.11
  -9  -4  -3   -0.09    0.15
   9  -4   3    0.20    0.20
   9   4   3    0.04    0.19
  -9   4  -3    0.08    0.18
 -10  -4  -3    2.52    0.31
  10  -4   3    2.17    0.32
 -10   4  -3    2.67    0.35
  10   4   3    2.27    0.34
  11  -4   3    4.05    0.42
 -11  -4  -3    3.84    0.39
  11   4   3    3.11    0.41
 -11   4  -3    3.30    0.40
  12  -4   3    0.18    0.23
  12   4   3    0.31    0.25
 -12   4  -3    0.05    0.25
 -13   4  -3    0.60    0.30
  13   4   3    0.62    0.32
  13   5  -3    0.15    0.28
 -13   5   3   -0.25    0.23
 -12   5   3    0.64    0.27
  12   5  -3    1.22    0.31
  11  -5  -3    0.22    0.21
  11   5  -3    0.51    0.26
 -11   5   3    0.37    0.25
  10  -5  -3    1.17    0.26
 -10  -5   3    2.03    0.27
 -10   5   3    1.58    0.28
  10   5  -3    1.59    0.29
  -9  -5   3    5.45    0.36
   9  -5  -3    5.42    0.40
  -9   5   3    5.65    0.40
   9   5  -3    4.87    0.38
   8  -5  -3   -0.01    0.17
  -8  -5   3    0.15    0.14
   8   5  -3    0.15    0.19
  -8   5   3   -0.11    0.15
   7  -5  -3    8.46    0.43
  -7  -5   3    9.47    0.41
  -7   5   3    9.24    0.45
   7   5  -3    9.20    0.46
   6  -5  -3   20.97    0.69
  -6  -5   3   21.28    0.67
  -6   5   3   21.38    0.72
   6   5  -3   21.26    0.71
  -6   5   3   21.64    0.64
  -5  -5   3    1.18    0.17
  -5  -5   3    1.04    0.14
   5  -5  -3    0.73    0.14
   5   5  -3    0.87    0.16
  -5   5   3    0.91    0.16
  -5   5   3    1.24    0.15
  -4  -5   3    2.21    0.16
  -4  -5   3    2.44    0.24
  -4  -5   3    2.30    0.22
   4  -5  -3    2.27    0.18
  -4   5   3    2.27    0.19
   4   5  -3    2.40    0.19
   4   5  -3    1.96    0.18
  -4   5   3    2.17    0.19
  -3  -5   3    0.12    0.12
  -3  -5   3   -0.04    0.11
  -3  -5   3    0.06    0.06
   3  -5  -3    0.00    0.07
  -3   5   3    0.05    0.09
   3   5  -3    0.03    0.08
  -3   5   3   -0.08    0.10
   3   5  -3    0.04    0.09
  -3   5   3   -0.07    0.08
  -2  -5   3    0.74    0.14
  -2  -5   3    0.82    0.15
   2  -5  -3    0.85    0.08
  -2   5   3    0.88    0.11
  -2   5   3    0.87    0.13
  -2   5   3    0.94    0.11
   2   5  -3    0.89    0.10
   2   5  -3    0.75    0.10
  -1  -5   3    4.02    0.26
  -1  -5   3    4.27    0.25
  -1   5   3    4.18    0.18
   1   5  -3    4.35    0.16
  -1   5   3    4.16    0.18
  -1   5   3    4.27    0.25
   1   5  -3    4.14    0.16
   0  -5   3    2.59    0.20
   0  -5  -3    2.99    0.19
   0  -5   3    2.76    0.23
   0   5  -3    2.67    0.12
   0   5   3    2.82    0.14
   0   5   3    2.78    0.14
   0   5  -3    2.66    0.12
   1  -5   3    2.72    0.23
   1  -5   3    2.92    0.22
  -1  -5  -3    3.07    0.19
  -1   5  -3    2.97    0.14
   1   5   3    2.95    0.15
   1   5   3    3.07    0.16
  -1   5  -3    3.14    0.15
   2  -5   3    0.62    0.07
   2  -5   3    0.40    0.13
  -2  -5  -3    0.44    0.07
  -2  -5  -3    0.56    0.12
   2  -5   3    0.46    0.13
   2   5   3    0.47    0.09
   2   5   3    0.38    0.09
  -2   5  -3    0.40    0.09
  -2   5  -3    0.49    0.09
  -3  -5  -3   18.55    0.56
   3  -5   3   18.10    0.61
  -3   5  -3   18.21    0.56
   3   5   3   18.15    0.55
   3   5   3   18.94    0.56
  -3   5  -3   18.79    0.56
  -4  -5  -3   89.83    2.26
   4  -5   3   91.35    2.34
  -4  -5  -3   91.38    2.25
   4  -5   3   93.30    2.26
  -4   5  -3   91.38    2.29
   4   5   3   91.76    2.29
   5  -5   3    4.90    0.28
   5  -5   3    4.17    0.26
  -5  -5  -3    4.74    0.26
  -5   5  -3    4.82    0.29
   5   5   3    4.65    0.29
   6  -5   3    0.73    0.14
  -6  -5  -3    0.62    0.15
   6  -5   3    1.05    0.18
  -6   5  -3    0.60    0.16
   6   5   3    0.51    0.17
  -7  -5  -3    3.05    0.27
   7  -5   3    2.99    0.28
   7  -5   3    2.71    0.23
   7   5   3    2.06    0.27
  -7   5  -3    2.45    0.27
   8  -5   3    3.48    0.25
  -8  -5  -3    3.46    0.30
   8  -5   3    2.38    0.28
  -8   5  -3    3.41    0.33
   8   5   3    3.45    0.35
   9  -5   3    0.25    0.12
   9  -5   3   -0.01    0.15
  -9  -5  -3    0.06    0.16
  -9   5  -3    0.23    0.18
   9   5   3   -0.03    0.18
 -10  -5  -3    0.68    0.20
  10  -5   3    0.49    0.22
 -10   5  -3    0.15    0.22
  10   5   3    0.80    0.26
  11  -5   3   -0.08    0.17
 -11   5  -3   -0.27    0.20
  11   5   3   -0.44    0.18
 -12   5  -3    2.03    0.37
  12   5   3    1.79    0.35
 -13   5  -3    0.54    0.27
  13   5   3   -0.01    0.25
  13   6  -3    1.31    0.33
 -13   6   3    0.85    0.32
 -12   6   3    0.15    0.23
  12   6  -3    0.84    0.30
 -11   6   3    4.60    0.46
  11   6  -3    5.07    0.48
  10   6  -3    0.54    0.24
 -10   6   3    0.95    0.25
   9  -6  -3    0.60    0.19
  -9   6   3    0.70    0.23
   9   6  -3    0.43    0.22
  -8  -6   3    5.61    0.33
   8  -6  -3    5.62    0.37
   8   6  -3    5.55    0.40
  -8   6   3    5.29    0.40
  -7  -6   3   12.81    0.50
   7  -6  -3   14.15    0.56
  -7   6   3   12.93    0.47
   7   6  -3   12.68    0.56
  -7   6   3   13.41    0.57
   6  -6  -3    5.52    0.31
  -6  -6   3    5.90    0.29
  -6   6   3    6.00    0.35
  -6   6   3    5.60    0.30
   6   6  -3    5.72    0.35
  -5  -6   3    1.59    0.22
  -5  -6   3    1.71    0.15
  -5  -6   3    1.54    0.21
   5  -6  -3    1.44    0.17
   5   6  -3    1.44    0.19
  -5   6   3    1.58    0.20
  -4  -6   3   10.71    0.33
  -4  -6   3   10.85    0.46
  -4  -6   3   11.01    0.46
   4  -6  -3   10.38    0.36
   4   6  -3   10.60    0.40
  -4   6   3   10.33    0.41
   4   6  -3   10.74    0.39
  -3  -6   3    0.36    0.15
   3  -6  -3   -0.02    0.06
  -3  -6   3    0.21    0.14
  -3   6   3    0.09    0.09
   3   6  -3   -0.01    0.08
  -3   6   3    0.04    0.09
   3   6  -3    0.10    0.09
  -2  -6   3   13.93    0.53
  -2  -6   3   14.66    0.51
  -2   6   3   13.59    0.42
  -2   6   3   13.58    0.42
   2   6  -3   13.45    0.40
   2   6  -3   13.32    0.40
  -1  -6   3    8.34    0.38
  -1  -6   3    7.83    0.38
   1   6  -3    8.18    0.25
  -1   6   3    8.33    0.27
  -1   6   3    8.22    0.27
   1   6  -3    7.89    0.25
   0  -6   3    1.85    0.21
   0  -6  -3    2.45    0.19
   0  -6   3    2.18    0.21
   0   6  -3    2.03    0.11
   0   6   3    2.36    0.13
   0   6  -3    2.19    0.11
   0   6   3    2.26    0.12
  -1  -6  -3    1.49    0.17
   1  -6   3    1.98    0.21
   1  -6   3    1.13    0.18
  -1   6  -3    1.50    0.12
  -1   6  -3    1.59    0.11
   1   6   3    1.69    0.13
   1   6   3    1.68    0.13
   2  -6   3   83.83    2.18
  -2  -6  -3   86.63    2.13
   2  -6   3   85.90    2.24
  -2   6  -3   84.99    2.08
  -2   6  -3   85.50    2.08
   2   6   3   85.70    2.09
   2   6   3   86.33    2.08
  -3  -6  -3    7.28    0.23
  -3  -6  -3    7.19    0.32
   3  -6   3    7.01    0.37
   3  -6   3    6.93    0.24
  -3   6  -3    7.14    0.30
   3   6   3    7.22    0.29
  -3   6  -3    7.16    0.30
   3   6   3    7.40    0.31
   4  -6   3    0.70    0.11
   4  -6   3    0.73    0.16
  -4  -6  -3    0.92    0.16
   4   6   3    0.75    0.13
  -4   6  -3    0.71    0.14
   4   6   3    0.91    0.15
  -5  -6  -3    0.34    0.12
  -5  -6  -3    0.21    0.14
   5  -6   3   -0.01    0.11
   5  -6   3    0.32    0.14
   5   6   3   -0.19    0.12
  -5   6  -3    0.04    0.13
  -6  -6  -3    0.50    0.14
   6  -6   3    0.49    0.15
   6  -6   3    0.42    0.15
  -6   6  -3    0.34    0.16
   6   6   3    0.56    0.18
   7  -6   3   -0.01    0.14
   7  -6   3    0.18    0.14
  -7  -6  -3    0.00    0.12
   7   6   3    0.14    0.16
  -7   6  -3    0.04    0.16
  -8  -6  -3    0.99    0.19
   8  -6   3    0.80    0.20
   8  -6   3    1.05    0.18
   8   6   3    0.94    0.23
  -8   6  -3    0.66    0.22
   9  -6   3    0.31    0.14
   9  -6   3    0.48    0.19
   9   6   3    0.12    0.19
  -9   6  -3   -0.03    0.19
  10   6   3    0.36    0.22
 -10   6  -3    0.17    0.20
 -11   6  -3    0.05    0.20
  11   6   3    0.00    0.24
  12   6   3   -0.30    0.23
 -12   6  -3    0.04    0.25
  13   6   3    0.12    0.26
 -13   6  -3    0.01    0.26
 -13   7   3    1.01    0.32
  13   7  -3    1.05    0.34
 -12   7   3    2.58    0.38
  12   7  -3    2.96    0.40
 -11   7   3    0.15    0.23
  11   7  -3   -0.16    0.23
  10   7  -3    2.04    0.33
 -10   7   3    1.60    0.29
  -9   7   3    4.22    0.40
   9   7  -3    3.94    0.38
  -8   7   3    0.49    0.20
   8   7  -3    0.50    0.21
   7  -7  -3   14.58    0.54
  -7  -7   3   13.30    0.60
   7   7  -3   13.12    0.57
  -7   7   3   12.95    0.58
   6  -7  -3    3.75    0.26
  -6  -7   3    4.55    0.34
   6   7  -3    3.37    0.29
  -6   7   3    3.83    0.31
   5  -7  -3    4.65    0.25
  -5  -7   3    4.53    0.21
  -5  -7   3    4.24    0.31
  -5  -7   3    3.96    0.32
   5   7  -3    4.92    0.29
  -5   7   3    4.11    0.29
  -4  -7   3    7.22    0.39
   4  -7  -3    7.55    0.27
  -4  -7   3    6.74    0.38
   4   7  -3    7.80    0.33
   4   7  -3    7.50    0.32
  -4   7   3    7.90    0.35
  -3  -7   3    4.10    0.31
  -3  -7   3    4.07    0.29
  -3   7   3    3.84    0.23
   3   7  -3    4.03    0.22
   3   7  -3    4.44    0.21
  -3   7   3    3.97    0.23
  -2  -7   3   -0.01    0.13
  -2  -7   3   -0.03    0.13
   2   7  -3    0.14    0.08
  -2   7   3    0.12    0.08
  -2   7   3    0.05    0.08
   2   7  -3   -0.01    0.06
  -1  -7   3    5.85    0.35
  -1  -7   3    6.80    0.36
   1   7  -3    6.39    0.20
   1   7  -3    6.33    0.20
  -1   7   3    6.14    0.23
  -1   7   3    6.24    0.23
   0  -7  -3    0.16    0.13
   0  -7   3    0.33    0.15
   0  -7   3    0.25    0.14
   0   7  -3    0.26    0.05
   0   7  -3    0.23    0.05
   0   7   3    0.18    0.07
   0   7   3    0.11    0.06
   1  -7   3   19.60    0.68
  -1  -7  -3   19.17    0.61
   1  -7   3   19.42    0.67
  -1   7  -3   19.01    0.52
   1   7   3   19.76    0.53
  -1   7  -3   19.17    0.52
   1   7   3   19.23    0.53
   2  -7   3    3.03    0.28
   2  -7   3    3.49    0.27
  -2  -7  -3    3.24    0.24
  -2   7  -3    3.56    0.19
   2   7   3    3.58    0.19
  -2   7  -3    3.88    0.20
   2   7   3    3.64    0.20
   3  -7   3    5.14    0.32
  -3  -7  -3    5.10    0.29
  -3   7  -3    4.99    0.26
   3   7   3    5.27    0.26
   3   7   3    5.01    0.25
  -3   7  -3    4.87    0.26
  -4  -7  -3    2.98    0.15
   4  -7   3    2.97    0.27
   4  -7   3    2.71    0.17
  -4  -7  -3    3.01    0.25
  -4   7  -3    3.14    0.23
   4   7   3    2.67    0.22
  -4   7  -3    2.78    0.23
   4   7   3    2.74    0.22
   5  -7   3   11.44    0.48
  -5  -7  -3   11.94    0.46
   5  -7   3    9.87    0.39
   5   7   3   11.07    0.46
  -5   7  -3   11.08    0.46
   6  -7   3    3.65    0.27
   6  -7   3    3.83    0.30
  -6  -7  -3    3.45    0.30
  -6  -7  -3    3.32    0.22
  -6   7  -3    3.54    0.30
   6   7   3    3.74    0.31
  -7  -7  -3    0.02    0.15
   7  -7   3    0.28    0.15
   7  -7   3   -0.25    0.12
  -7   7  -3   -0.03    0.15
   7   7   3   -0.04    0.16
  -8  -7  -3    1.82    0.25
   8  -7   3    1.94    0.23
   8   7   3    2.01    0.29
  -8   7  -3    1.93    0.29
   9  -7   3   -0.27    0.12
   9   7   3   -0.16    0.16
  -9   7  -3   -0.15    0.18
  10   7   3   -0.29    0.19
 -10   7  -3   -0.04    0.20
  11   7   3    0.68    0.27
 -11   7  -3    0.17    0.24
 -12   7  -3    0.23    0.26
  12   7   3    0.01    0.23
 -12   8   3    0.64    0.29
  12   8  -3    0.91    0.31
 -11   8   3    0.26    0.24
  11   8  -3    0.76    0.29
 -10  -8   3    0.37    0.23
 -10   8   3    0.11    0.21
  10   8  -3    0.53    0.23
  -9  -8   3    0.17    0.22
  -9   8   3    0.48    0.22
   9   8  -3    0.11    0.20
  -8  -8   3   -0.12    0.17
   8   8  -3    0.20    0.18
  -8   8   3    0.36    0.20
  -7  -8   3    0.26    0.20
   7   8  -3    0.43    0.18
  -7   8   3    0.08    0.17
  -6  -8   3    0.53    0.21
  -6   8   3    0.75    0.19
   6   8  -3    1.04    0.19
  -5  -8   3    0.69    0.21
   5   8  -3    1.02    0.17
  -5   8   3    0.78    0.17
  -4  -8   3   13.10    0.56
  -4  -8   3   13.12    0.57
  -4   8   3   13.25    0.48
   4   8  -3   13.19    0.45
   4   8  -3   13.38    0.46
  -4   8   3   12.67    0.47
  -3  -8   3    2.12    0.26
  -3  -8   3    2.51    0.27
  -3   8   3    2.79    0.20
  -3   8   3    2.99    0.21
   3   8  -3    2.32    0.18
   3   8  -3    2.47    0.17
  -2  -8   3    0.68    0.19
  -2  -8   3    0.66    0.18
  -2   8   3    0.70    0.11
  -2   8   3    0.89    0.12
   2   8  -3    0.93    0.10
   2   8  -3    0.91    0.10
  -1  -8   3   14.66    0.57
  -1  -8   3   14.25    0.59
   1   8  -3   14.85    0.40
  -1   8   3   14.70    0.43
   1   8  -3   14.14    0.39
  -1   8   3   14.64    0.43
   0  -8  -3   10.49    0.44
   0  -8   3   10.25    0.46
   0  -8   3   10.18    0.49
   0   8  -3   10.26    0.29
   0   8  -3   10.26    0.29
   0   8   3   10.55    0.32
   0   8   3   10.21    0.31
   0   8   3   10.06    0.32
  -1  -8  -3   29.67    0.87
   1  -8   3   27.68    0.93
   1  -8   3   28.18    0.90
  -1   8  -3   28.13    0.73
  -1   8  -3   28.05    0.73
   1   8   3   29.07    0.74
   1   8   3   27.94    0.74
  -2  -8  -3    0.89    0.18
   2  -8   3    1.00    0.21
   2  -8   3    0.70    0.18
   2   8   3    0.81    0.11
   2   8   3    0.76    0.11
  -2   8  -3    0.98    0.11
  -2   8  -3    0.93    0.11
  -3  -8  -3    1.92    0.22
   3  -8   3    1.67    0.24
   3   8   3    2.12    0.17
  -3   8  -3    1.66    0.16
   3   8   3    1.82    0.17
  -3   8  -3    1.67    0.16
   4  -8   3    0.83    0.20
  -4  -8  -3    0.71    0.18
   4   8   3    0.72    0.14
  -4   8  -3    0.89    0.15
  -4   8  -3    0.61    0.14
   4   8   3    0.69    0.15
   5  -8   3    0.53    0.18
  -5  -8  -3    0.72    0.19
   5   8   3    0.49    0.15
  -5   8  -3    0.30    0.15
  -6  -8  -3    0.28    0.17
   6  -8   3    0.26    0.17
   6   8   3    0.09    0.16
  -6   8  -3    0.08    0.15
  -7  -8  -3    0.92    0.21
   7  -8   3    1.20    0.21
   7   8   3    1.27    0.23
  -7   8  -3    0.88    0.22
   8  -8   3    1.84    0.25
  -8  -8  -3    1.69    0.25
  -8   8  -3    0.85    0.23
   8   8   3    1.81    0.27
  -9  -8  -3    0.12    0.19
  -9   8  -3    0.23    0.21
   9   8   3    0.44    0.21
 -10  -8  -3    0.87    0.23
 -10   8  -3    0.99    0.27
  10   8   3    0.62    0.25
 -11  -8  -3   -0.08    0.20
  11   8   3   -0.48    0.20
 -11   8  -3    0.48    0.25
 -12  -8  -3   -0.05    0.21
 -12   8  -3    0.10    0.23
  12   8   3    0.42    0.27
 -12  -9   3    1.72    0.35
 -12   9   3    1.67    0.36
  12   9  -3    1.57    0.34
 -11  -9   3    0.18    0.24
 -11   9   3    0.28    0.23
  11   9  -3    0.21    0.24
 -10  -9   3    2.00    0.32
 -10   9   3    1.28    0.29
  10   9  -3    1.01    0.29
  -9  -9   3   -0.26    0.18
   9   9  -3   -0.23    0.20
  -9   9   3    0.15    0.21
  -8  -9   3   -0.10    0.18
   8   9  -3   -0.17    0.16
  -8   9   3    0.05    0.19
  -7  -9   3    0.51    0.21
  -7   9   3    0.50    0.19
   7   9  -3    0.15    0.17
  -6  -9   3   -0.18    0.18
   6   9  -3    0.23    0.16
  -6   9   3   -0.27    0.12
  -5  -9   3    7.39    0.44
  -5   9   3    8.07    0.38
   5   9  -3    6.65    0.35
  -4  -9   3    1.99    0.28
  -4  -9   3    2.87    0.30
   4   9  -3    2.19    0.20
  -4   9   3    2.38    0.22
  -3  -9   3    0.87    0.22
  -3  -9   3    0.77    0.21
   3   9  -3    0.58    0.11
  -3   9   3    0.72    0.13
   3   9  -3    0.70    0.12
  -3   9   3    0.63    0.13
  -2  -9   3    0.73    0.20
  -2  -9   3    0.71    0.21
  -2   9   3    0.85    0.12
  -2   9   3    0.44    0.11
   2   9  -3    0.62    0.10
   2   9  -3    0.77    0.09
  -1  -9   3   14.52    0.63
  -1  -9   3   13.93    0.58
   1   9  -3   14.52    0.39
  -1   9   3   13.72    0.42
   1   9  -3   14.10    0.39
  -1   9   3   14.40    0.43
   0  -9   3    5.06    0.35
   0  -9  -3    5.72    0.35
   0  -9   3    5.51    0.38
   0   9  -3    5.43    0.19
   0   9   3    5.50    0.21
   0   9  -3    5.79    0.19
   0   9   3    5.45    0.22
   1  -9   3    5.08    0.37
  -1  -9  -3    4.23    0.29
   1  -9   3    4.40    0.35
  -1   9  -3    4.14    0.18
   1   9   3    4.23    0.20
   1   9   3    4.60    0.20
  -1   9  -3    4.36    0.19
   2  -9   3    0.08    0.16
  -2  -9  -3   -0.04    0.15
   2  -9   3    0.16    0.17
  -2   9  -3    0.00    0.08
   2   9   3   -0.01    0.08
   2   9   3   -0.08    0.08
  -2   9  -3    0.03    0.09
  -3  -9  -3    0.84    0.19
   3  -9   3    0.58    0.21
  -3   9  -3    0.68    0.13
   3   9   3    0.71    0.13
  -3   9  -3    0.81    0.13
   3   9   3    0.73    0.12
  -4  -9  -3    8.58    0.42
   4  -9   3    9.25    0.49
   4   9   3    8.83    0.38
  -4   9  -3    9.10    0.39
   5  -9   3   -0.02    0.16
  -5  -9  -3    0.08    0.15
  -5   9  -3   -0.13    0.13
   5   9   3    0.00    0.13
   6  -9   3    2.92    0.30
  -6  -9  -3    2.56    0.28
   6   9   3    2.48    0.26
  -6   9  -3    2.01    0.25
  -7  -9  -3    0.07    0.17
   7  -9   3   -0.13    0.15
   7   9   3    0.09    0.17
  -7   9  -3    0.32    0.18
  -8  -9  -3   -0.08    0.17
   8  -9   3    0.04    0.16
  -8   9  -3    0.12    0.18
   8   9   3   -0.32    0.16
  -9  -9  -3    0.34    0.19
  -9   9  -3    0.33    0.22
   9   9   3    0.35    0.22
 -10  -9  -3    0.25    0.22
  10   9   3    0.50    0.25
 -10   9  -3   -0.23    0.19
 -11  -9  -3   -0.14    0.19
 -11   9  -3    0.12    0.24
  11   9   3    0.29    0.27
 -11 -10   3   -0.24    0.23
 -11  10   3    0.14    0.24
  11  10  -3    0.13    0.24
 -10 -10   3    0.38    0.24
 -10  10   3    0.20    0.23
  10  10  -3    0.56    0.25
  -9 -10   3    0.44    0.22
  -9  10   3   -0.17    0.18
   9  10  -3    0.04    0.20
  -8 -10   3    0.19    0.22
   8  10  -3    0.26    0.19
  -8  10   3   -0.13    0.17
  -7 -10   3    0.78    0.25
  -7  10   3    0.58    0.20
   7  10  -3    0.52    0.20
  -6 -10   3    0.23    0.21
   6  10  -3    0.51    0.17
  -6  10   3    0.29    0.16
  -5 -10   3   -0.11    0.17
  -5  10   3    0.04    0.13
   5  10  -3   -0.24    0.12
  -4 -10   3    1.40    0.27
   4  10  -3    1.16    0.16
  -4  10   3    1.33    0.18
  -3 -10   3    0.36    0.20
  -3 -10   3    0.16    0.18
  -3  10   3    0.24    0.12
   3  10  -3    0.28    0.11
  -2 -10   3    2.68    0.31
  -2 -10   3    2.42    0.32
  -2  10   3    3.27    0.19
   2  10  -3    2.85    0.17
   2  10  -3    2.82    0.15
  -1 -10   3   14.85    0.68
  -1 -10   3   15.83    0.66
  -1  10   3   15.85    0.47
  -1  10   3   16.08    0.47
   1  10  -3   16.03    0.43
   0 -10   3    1.26    0.26
   0 -10  -3    1.37    0.23
   0 -10   3    1.30    0.25
   0  10   3    1.58    0.12
   0  10  -3    1.38    0.09
   0  10   3    1.15    0.12
   1 -10   3    8.50    0.48
   1 -10   3    9.73    0.53
  -1 -10  -3    9.60    0.47
  -1  10  -3    9.58    0.30
   1  10   3    9.15    0.31
   1  10   3    9.42    0.32
  -1  10  -3    9.11    0.30
   2 -10   3    2.13    0.31
  -2 -10  -3    1.78    0.26
   2 -10   3    2.38    0.31
  -2  10  -3    1.88    0.15
   2  10   3    2.08    0.16
   3 -10   3    0.05    0.18
  -3 -10  -3   -0.15    0.15
   3  10   3    0.09    0.11
  -3  10  -3   -0.02    0.10
  -4 -10  -3    0.58    0.19
   4 -10   3    0.04    0.18
   4  10   3    0.20    0.13
  -4  10  -3    0.18    0.13
   5 -10   3    0.41    0.20
  -5 -10  -3    0.52    0.19
   5  10   3    0.65    0.17
  -5  10  -3    0.49    0.16
  -6 -10  -3    3.09    0.32
   6 -10   3    3.18    0.35
  -6  10  -3    3.07    0.30
   6  10   3    3.21    0.29
   7 -10   3   -0.03    0.17
  -7 -10  -3    0.02    0.18
   7  10   3    0.02    0.17
  -7  10  -3    0.19    0.18
  -8 -10  -3    0.05    0.19
   8 -10   3   -0.12    0.17
   8  10   3   -0.11    0.18
  -8  10  -3   -0.24    0.18
  -9 -10  -3    3.24    0.37
   9  10   3    4.05    0.40
  -9  10  -3    4.31    0.42
 -10 -10  -3    0.35    0.22
  10  10   3   -0.03    0.23
 -10  10  -3    0.26    0.23
 -11 -10  -3    0.29    0.23
 -11  10  -3    0.29    0.23
  11  10   3    0.62    0.28
 -10 -11   3    0.04    0.25
 -10  11   3    0.14    0.23
  10  11  -3    0.01    0.22
  -9 -11   3   -0.12    0.20
   9  11  -3   -0.22    0.19
  -9  11   3    0.00    0.20
  -8 -11   3    0.13    0.21
  -8  11   3    0.26    0.21
   8  11  -3   -0.15    0.18
  -7 -11   3    0.27    0.21
   7  11  -3    0.11    0.17
  -7  11   3    0.38    0.18
  -6 -11   3    1.27    0.28
   6  11  -3    0.77    0.18
  -6  11   3    1.23    0.22
  -5 -11   3    0.83    0.25
  -5  11   3    0.81    0.17
   5  11  -3    0.72    0.17
  -4 -11   3    0.86    0.25
  -4  11   3    0.96    0.17
   4  11  -3    0.90    0.16
  -3 -11   3    0.31    0.20
  -3 -11   3    0.21    0.19
  -3  11   3    0.20    0.12
   3  11  -3    0.44    0.12
  -2 -11   3    0.03    0.19
  -2 -11   3    0.25    0.20
   2  11  -3    0.02    0.08
  -2  11   3   -0.08    0.09
  -1 -11   3   -0.08    0.18
  -1 -11   3    0.18    0.20
  -1  11   3   -0.08    0.08
   0 -11   3    4.95    0.38
   0 -11   3    4.74    0.43
   0 -11  -3    4.73    0.35
   0  11   3    4.33    0.21
   1 -11   3    1.16    0.27
   1 -11   3    1.01    0.25
  -1 -11  -3    0.86    0.23
  -1  11  -3    1.05    0.11
   1  11   3    1.31    0.12
  -2 -11  -3    2.93    0.31
   2 -11   3    2.63    0.35
   2 -11   3    3.40    0.38
  -2  11  -3    3.22    0.20
   2  11   3    3.47    0.21
   3 -11   3    1.37    0.28
  -3 -11  -3    0.91    0.22
  -3  11  -3    1.29    0.16
   3  11   3    1.21    0.15
   4 -11   3   -0.06    0.18
  -4 -11  -3   -0.08    0.16
  -4  11  -3   -0.03    0.12
   4  11   3    0.17    0.12
  -5 -11  -3   -0.05    0.16
   5 -11   3   -0.04    0.18
  -5  11  -3   -0.20    0.13
   5  11   3   -0.02    0.13
  -6 -11  -3    0.51    0.21
   6 -11   3    0.12    0.20
   6  11   3    0.27    0.17
  -6  11  -3    0.48    0.19
  -7 -11  -3    0.30    0.20
   7 -11   3    0.05    0.21
  -7  11  -3    0.20    0.19
   7  11   3    0.32    0.19
  -8 -11  -3    0.24    0.20
   8 -11   3   -0.02    0.19
   8  11   3    0.29    0.21
  -8  11  -3    0.01    0.20
  -9 -11  -3    0.08    0.21
   9  11   3    0.22    0.23
  -9  11  -3    0.70    0.23
 -10 -11  -3    0.05    0.23
 -10  11  -3    0.27    0.25
  10  11   3    0.21    0.23
  -9 -12   3   -0.04    0.24
   9  12  -3   -0.45    0.19
  -9  12   3   -0.01    0.21
  -8 -12   3    0.56    0.26
   8  12  -3    0.47    0.21
  -8  12   3    0.00    0.19
  -7 -12   3    0.43    0.25
  -7  12   3    0.60    0.21
   7  12  -3    0.43    0.20
  -6 -12   3    0.29    0.23
   6  12  -3    0.11    0.15
  -6  12   3   -0.35    0.15
  -5 -12   3    1.68    0.29
   5  12  -3    1.54    0.21
  -5  12   3    1.76    0.23
  -4 -12   3    0.03    0.21
   4  12  -3    0.17    0.13
  -4  12   3    0.10    0.13
  -3 -12   3    3.24    0.36
  -3  12   3    4.05    0.25
   3  12  -3    4.34    0.24
  -2 -12   3    0.67    0.23
  -2 -12   3    0.47    0.24
  -2  12   3    0.32    0.11
   2  12  -3    0.39    0.08
  -1 -12   3    0.53    0.23
  -1 -12   3    0.38    0.23
  -1  12   3    0.66    0.11
   0 -12   3    2.36    0.34
   0 -12   3    2.32    0.32
   0 -12  -3    2.22    0.29
   0  12   3    2.58    0.17
  -1 -12  -3    0.84    0.24
   1 -12   3    0.82    0.26
   1 -12   3    0.76    0.25
   1  12   3    0.63    0.11
  -1  12  -3    0.57    0.09
  -2 -12  -3    0.33    0.20
   2 -12   3    0.05    0.21
  -2  12  -3    0.05    0.09
   2  12   3    0.18    0.10
  -3 -12  -3    0.50    0.21
   3 -12   3    0.57    0.24
  -3  12  -3    0.63    0.14
   3  12   3    0.50    0.12
  -4 -12  -3    0.34    0.20
   4 -12   3    0.11    0.23
   4  12   3    0.34    0.13
  -4  12  -3    0.41    0.14
  -5 -12  -3    0.04    0.18
   5 -12   3    0.22    0.22
  -5  12  -3    0.23    0.16
   5  12   3    0.19    0.15
  -6 -12  -3    0.68    0.23
   6 -12   3    1.04    0.28
  -6  12  -3    1.18    0.21
   6  12   3    0.80    0.20
  -7 -12  -3    1.09    0.26
   7 -12   3    1.42    0.30
   7  12   3    1.41    0.24
  -7  12  -3    1.14    0.24
  -8 -12  -3    1.18    0.28
   8  12   3    0.79    0.24
  -8  12  -3    0.96    0.25
  -9 -12  -3    0.32    0.24
   9  12   3    0.01    0.22
  -9  12  -3   -0.31    0.21
  -8 -13   3    0.61    0.29
   8  13  -3    1.29    0.27
  -8  13   3    0.57    0.24
  -7 -13   3    0.00    0.24
  -7  13   3    0.08    0.19
   7  13  -3    0.00    0.18
  -6 -13   3    3.52    0.42
  -6  13   3    3.06    0.31
   6  13  -3    3.55    0.30
  -5 -13   3   -0.01    0.21
   5  13  -3    0.06    0.14
  -5  13   3    0.16    0.16
  -4 -13   3    0.49    0.25
   4  13  -3    0.53    0.14
  -4  13   3    0.42    0.15
  -3 -13   3    0.71    0.25
   3  13  -3    0.18    0.10
  -3  13   3    0.25    0.14
  -2 -13   3    2.51    0.36
  -2  13   3    2.35    0.19
  -1 -13   3    1.91    0.33
  -1  13   3    2.20    0.16
   0 -13   3    2.96    0.39
   0 -13  -3    1.65    0.30
   0 -13   3    2.60    0.37
   0  13   3    2.15    0.15
  -1 -13  -3    4.00    0.40
   1 -13   3    3.04    0.40
   1 -13   3    3.09    0.39
   1  13   3    3.33    0.20
  -2 -13  -3    0.25    0.21
   2 -13   3    0.12    0.23
   2  13   3    0.20    0.10
  -2  13  -3    0.18    0.10
  -3 -13  -3   -0.28    0.18
   3 -13   3   -0.19    0.21
   3  13   3    0.14    0.11
  -3  13  -3   -0.01    0.11
  -4 -13  -3   -0.17    0.19
   4 -13   3    0.07    0.25
  -4  13  -3    0.07    0.13
   4  13   3   -0.03    0.12
  -5 -13  -3    0.19    0.21
   5 -13   3    0.21    0.23
  -5  13  -3    0.00    0.14
   5  13   3    0.05    0.15
   6 -13   3    0.06    0.22
  -6 -13  -3   -0.12    0.19
  -6  13  -3    0.02    0.17
   6  13   3   -0.45    0.14
  -7 -13  -3    0.53    0.25
  -7  13  -3    0.37    0.20
   7  13   3    0.33    0.20
  -8 -13  -3    0.89    0.26
   8  13   3    0.33    0.22
  -8  13  -3    0.02    0.20
  -7 -14   3    1.25    0.33
  -7  14   3    1.24    0.26
   7  14  -3    0.92    0.23
  -6 -14   3    1.67    0.34
  -6  14   3    1.82    0.26
   6  14  -3    2.23    0.26
  -5 -14   3    0.43    0.26
   5  14  -3    0.78    0.18
  -5  14   3    0.79    0.20
  -4 -14   3    1.80    0.34
   4  14  -3    1.63    0.17
  -4  14   3    1.46    0.21
  -3 -14   3    1.09    0.29
  -3  14   3    0.74    0.16
  -2 -14   3    0.58    0.28
  -2  14   3    0.41    0.12
  -1 -14   3    2.89    0.38
  -1  14   3    2.55    0.19
   0 -14   3    0.15    0.25
  -1 -14  -3    0.96    0.26
   1 -14   3    0.72    0.28
  -2 -14  -3    1.22    0.28
  -2  14  -3    1.20    0.13
   2  14   3    0.95    0.13
  -3 -14  -3    0.06    0.21
   3  14   3    0.03    0.12
  -3  14  -3    0.00    0.11
  -4 -14  -3    0.25    0.22
  -4  14  -3    0.65    0.17
   4  14   3    0.46    0.15
  -5 -14  -3    0.56    0.24
  -5  14  -3   -0.02    0.15
   5  14   3    0.22    0.16
  -6 -14  -3    0.02    0.23
  -6  14  -3    0.42    0.19
   6  14   3    0.40    0.18
  -7 -14  -3   -0.01    0.23
  -7  14  -3    0.00    0.20
   7  14   3   -0.02    0.19
  -5 -15   3    1.69    0.37
  -5  15   3    1.64    0.24
  -4 -15   3   -0.12    0.23
  -4  15   3   -0.15    0.13
  -3 -15   3    0.05    0.25
  -3  15   3   -0.29    0.11
  -2 -15   3    1.84    0.35
  -1 -15   3    0.12    0.27
   0 -15   3    2.82    0.42
  -1 -15  -3    0.00    0.22
  -2 -15  -3   -0.01    0.22
  -3 -15  -3   -0.32    0.20
  -4 -15  -3    0.83    0.28
  -4  15  -3    1.24    0.19
  -5 -15  -3    0.31    0.25
  -5  15  -3    0.64    0.19
   5  15   3    0.38    0.17
  -2 -16   3    0.27    0.27
  -1 -16   3    0.23    0.27
   0 -16   3    0.44    0.29
  -2 -16  -3    0.33    0.25
  14   0  -4    0.98    0.35
 -14   0   4    0.14    0.26
  13   0  -4   -0.11    0.25
 -13   0   4   -0.10    0.21
 -12   0   4    0.18    0.20
  12   0  -4   -0.24    0.22
  11   0  -4    0.14    0.22
 -11   0   4   -0.03    0.17
  10   0  -4    1.68    0.30
 -10   0   4    1.76    0.27
  -9   0   4   -0.23    0.16
   9   0  -4   -0.16    0.17
  -8   0   4    4.00    0.31
   8   0  -4    3.48    0.34
   7   0  -4    0.09    0.15
  -7   0   4    0.12    0.14
   6   0  -4   48.23    1.32
  -6   0   4   46.07    1.31
   5   0  -4    0.00    0.12
  -5   0   4    0.03    0.11
  -5   0   4    0.01    0.04
   4   0  -4  186.03    4.46
  -4   0   4  184.07    4.46
  -3   0   4    0.07    0.09
   3   0  -4    0.07    0.09
   2   0  -4    4.70    0.21
  -2   0   4    4.66    0.21
   1   0  -4   -0.14    0.07
  -1   0   4   -0.11    0.07
  -1   0   4   -0.06    0.07
   0   0  -4  101.58    2.42
   0   0   4  100.12    2.42
   1   0   4   -0.13    0.07
  -1   0  -4   -0.05    0.04
  -1   0  -4   -0.13    0.07
   2   0   4  120.74    2.90
  -2   0  -4  119.42    2.89
   3   0   4   -0.03    0.10
  -3   0  -4   -0.15    0.08
   4   0   4   30.62    0.87
  -4   0  -4   30.06    0.86
  -5   0  -4    0.16    0.11
   5   0   4   -0.12    0.10
   6   0   4    6.87    0.36
  -6   0  -4    6.60    0.36
   7   0   4    0.01    0.14
  -7   0  -4    0.06    0.14
   8   0   4    6.22    0.42
  -8   0  -4    6.14    0.41
  -9   0  -4   -0.06    0.17
   9   0   4    0.06    0.20
  10   0   4    1.56    0.29
 -10   0  -4    0.88    0.24
  11   0   4    0.17    0.21
 -11   0  -4    0.14    0.20
  12   0   4   -0.02    0.22
 -12   0  -4   -0.23    0.19
 -13   0  -4   -0.07    0.21
  13   0   4    0.09    0.27
 -14   0  -4    0.05    0.27
  14   0   4    0.23    0.28
  14  -1  -4    1.09    0.35
 -14  -1   4    1.36    0.34
  14   1  -4    1.44    0.35
 -14   1   4    1.11    0.33
  13  -1  -4    0.00    0.26
 -13  -1   4    0.30    0.24
  13   1  -4    0.37    0.27
 -13   1   4    0.14    0.25
 -12  -1   4    0.27    0.22
  12  -1  -4   -0.06    0.22
  12   1  -4    0.06    0.23
 -12   1   4    0.11    0.22
  11  -1  -4    0.19    0.21
 -11  -1   4    0.10    0.19
 -11   1   4    0.20    0.19
  11   1  -4    0.04    0.23
  10  -1  -4    0.05    0.20
 -10  -1   4    0.11    0.19
 -10   1   4    0.04    0.16
  10   1  -4    0.48    0.23
  -9  -1   4    0.47    0.21
   9  -1  -4    0.65    0.23
  -9   1   4    0.50    0.20
   9   1  -4    0.58    0.23
  -8  -1   4    1.42    0.23
   8  -1  -4    1.04    0.22
   8   1  -4    0.93    0.23
  -8   1   4    1.68    0.25
  -7  -1   4    9.56    0.45
   7  -1  -4   10.06    0.46
  -7   1   4   10.67    0.48
   7   1  -4   10.71    0.49
   6  -1  -4   27.41    0.85
  -6  -1   4   26.68    0.84
   6   1  -4   27.81    0.85
  -6   1   4   26.39    0.84
  -5  -1   4   27.73    0.72
   5  -1  -4   27.43    0.82
  -5  -1   4   27.97    0.82
   5   1  -4   27.67    0.82
  -5   1   4   26.85    0.82
  -4  -1   4  321.90    7.55
   4  -1  -4  317.45    7.55
  -4  -1   4  309.99    7.61
   4   1  -4  314.73    7.55
  -4   1   4  324.73    7.56
  -3  -1   4    4.23    0.19
  -3  -1   4    4.42    0.23
   3  -1  -4    4.09    0.24
  -3   1   4    4.43    0.22
   3   1  -4    4.13    0.23
   2  -1  -4    1.43    0.13
  -2  -1   4    1.72    0.14
  -2   1   4    1.80    0.14
   2   1  -4    1.60    0.14
  -1  -1   4  193.71    4.71
   1  -1  -4  195.48    4.71
   1   1  -4  203.49    4.71
  -1   1   4  202.31    4.71
  -1   1   4  202.38    4.72
   1   1  -4  198.35    4.71
   1   1  -4  197.67    4.71
   0  -1  -4  639.73   14.73
   0  -1   4  529.13   14.58
   0  -1   4  640.68   14.80
   0   1  -4  628.16   14.80
   0   1   4  635.21   14.69
   0   1  -4  641.88   14.79
   0   1   4  630.65   14.70
  -1  -1  -4   49.49    1.25
   1  -1   4   51.19    1.26
   1  -1   4   50.78    1.23
  -1   1  -4   50.65    1.26
   1   1   4   49.74    1.26
   1   1   4   49.91    1.25
  -1   1  -4   51.77    1.26
   2  -1   4   23.58    0.65
  -2  -1  -4   22.84    0.64
  -2   1  -4   22.59    0.64
   2   1   4   23.82    0.66
   3  -1   4    2.16    0.18
  -3  -1  -4    2.27    0.18
   3   1   4    2.20    0.18
  -3   1  -4    2.28    0.18
  -4  -1  -4   60.77    1.55
   4  -1   4   59.06    1.55
  -4   1  -4   59.16    1.55
   4   1   4   60.79    1.56
  -5  -1  -4   -0.07    0.11
   5  -1   4   -0.01    0.11
   5   1   4    0.11    0.12
  -5   1  -4    0.03    0.11
   6  -1   4    2.47    0.25
  -6  -1  -4    2.40    0.24
  -6   1  -4    2.43    0.24
   6   1   4    2.05    0.23
  -7  -1  -4    6.48    0.37
   7  -1   4    7.91    0.42
   7   1   4    6.56    0.39
  -7   1  -4    7.10    0.38
   8  -1   4    0.07    0.18
  -8  -1  -4    0.53    0.17
   8   1   4    0.55    0.20
  -8   1  -4    0.13    0.17
  -9  -1  -4    0.36    0.19
   9  -1   4    0.20    0.20
  -9   1  -4    0.39    0.20
   9   1   4    0.23    0.19
  10  -1   4    0.97    0.25
 -10  -1  -4    0.94    0.25
  10   1   4    1.11    0.28
 -10   1  -4    1.30    0.27
  11  -1   4    1.71    0.33
 -11  -1  -4    2.04    0.33
 -11   1  -4    1.70    0.30
  11   1   4    1.77    0.32
  12  -1   4    0.39    0.25
 -12  -1  -4    0.34    0.22
  12   1   4   -0.23    0.22
 -12   1  -4    0.06    0.21
  13  -1   4    0.14    0.26
 -13  -1  -4   -0.13    0.22
  13   1   4    0.40    0.28
 -13   1  -4   -0.10    0.24
  14  -1   4    0.23    0.28
 -14  -1  -4   -0.08    0.22
 -14   1  -4   -0.12    0.26
  14   1   4    0.20    0.30
  14  -2  -4    0.00    0.28
 -14  -2   4    0.06    0.24
  14   2  -4   -0.33    0.24
 -14   2   4   -0.23    0.24
  13  -2  -4   -0.45    0.19
 -13  -2   4   -0.08    0.21
 -13   2   4   -0.05    0.22
  13   2  -4    0.22    0.26
  12  -2  -4    0.20    0.22
 -12  -2   4    0.24    0.20
 -12   2   4    0.18    0.23
  12   2  -4    0.20    0.25
  11  -2  -4    0.30    0.21
 -11  -2   4    0.33    0.20
 -11   2   4    0.53    0.22
  11   2  -4    0.31    0.22
 -10  -2   4    3.88    0.36
  10  -2  -4    4.59    0.41
  10   2  -4    4.37    0.41
 -10   2   4    3.46    0.37
   9  -2  -4   11.15    0.57
  -9  -2   4   10.43    0.52
   9   2  -4   10.35    0.54
  -9   2   4   10.16    0.53
  -8  -2   4    4.10    0.32
   8  -2  -4    4.91    0.38
  -8   2   4    5.13    0.36
   8   2  -4    4.82    0.39
  -7  -2   4    0.00    0.12
   7  -2  -4    0.19    0.15
  -7   2   4    0.28    0.16
   7   2  -4    0.06    0.14
   6  -2  -4    2.48    0.24
  -6  -2   4    2.02    0.15
  -6  -2   4    2.12    0.22
  -6   2   4    1.91    0.22
   6   2  -4    1.95    0.23
   5  -2  -4    3.06    0.23
  -5  -2   4    3.06    0.22
  -5  -2   4    3.34    0.19
   5   2  -4    2.90    0.24
  -5   2   4    3.03    0.25
  -5   2   4    3.08    0.13
  -4  -2   4    5.00    0.23
  -4  -2   4    5.29    0.26
   4  -2  -4    5.40    0.28
   4   2  -4    5.00    0.26
  -4   2   4    5.15    0.27
  -3  -2   4    3.42    0.19
   3  -2  -4    3.45    0.22
  -3  -2   4    3.52    0.20
  -3   2   4    3.50    0.20
   3   2  -4    4.14    0.23
  -2  -2   4  103.38    2.56
   2  -2  -4  102.09    2.50
  -2  -2   4  104.09    2.50
  -2  -2   4  103.07    2.50
  -2   2   4  104.16    2.51
   2   2  -4  101.89    2.50
   2   2  -4  105.95    2.51
   1  -2  -4   50.62    1.27
  -1  -2   4   52.00    1.28
  -1  -2   4   51.10    1.27
  -1   2   4   51.05    1.27
  -1   2   4   51.55    1.28
   1   2  -4   50.97    1.27
   1   2  -4   51.49    1.27
   0  -2  -4   17.29    0.48
   0  -2   4   17.49    0.48
   0  -2   4   17.10    0.49
   0   2   4   16.90    0.48
   0   2  -4   17.24    0.48
   0   2   4   17.40    0.48
   0   2   4   17.46    0.44
   0   2  -4   17.57    0.48
  -1  -2  -4    7.36    0.20
   1  -2   4    7.36    0.26
   1  -2   4    6.91    0.26
  -1  -2  -4    6.71    0.25
  -1   2  -4    7.04    0.26
  -1   2  -4    6.98    0.25
   1   2   4    7.26    0.26
   1   2   4    6.90    0.25
   2  -2   4   16.44    0.50
  -2  -2  -4   17.67    0.50
  -2   2  -4   17.08    0.50
   2   2   4   16.92    0.50
   3  -2   4   60.53    1.53
  -3  -2  -4   60.02    1.52
   3   2   4   61.51    1.54
  -3   2  -4   59.06    1.52
   4  -2   4   26.87    0.78
  -4  -2  -4   26.64    0.78
  -4   2  -4   27.05    0.79
   4   2   4   27.47    0.79
  -5  -2  -4    6.34    0.32
   5  -2   4    6.03    0.34
   5   2   4    6.40    0.32
  -5   2  -4    6.78    0.34
   6  -2   4    6.66    0.37
  -6  -2  -4    5.98    0.34
  -6   2  -4    5.96    0.33
   6   2   4    6.63    0.36
   7  -2   4    1.57    0.23
  -7  -2  -4    1.61    0.22
   7   2   4    1.55    0.24
  -7   2  -4    1.81    0.24
  -8  -2  -4    0.48    0.18
   8  -2   4    0.25    0.18
  -8   2  -4    0.20    0.17
   8   2   4    0.48    0.20
   9  -2   4    0.50    0.22
  -9  -2  -4    0.76    0.22
   9  -2   4    0.32    0.12
   9   2   4    0.43    0.22
  -9   2  -4    0.46    0.21
 -10  -2  -4    5.65    0.44
  10  -2   4    5.04    0.45
 -10   2  -4    5.00    0.45
  10   2   4    5.62    0.44
 -11  -2  -4    1.26    0.27
  11  -2   4    1.47    0.29
 -11   2  -4    1.13    0.27
  11   2   4    1.54    0.32
 -12  -2  -4    0.11    0.22
  12  -2   4    0.17    0.25
  12   2   4    0.04    0.24
 -12   2  -4    0.12    0.22
 -13  -2  -4    0.62    0.26
  13  -2   4    0.90    0.31
  13   2   4    0.49    0.30
 -13   2  -4   -0.17    0.21
  14  -2   4    0.16    0.28
 -14  -2  -4    0.13    0.26
 -14   2  -4    0.48    0.30
  14   2   4   -0.02    0.30
  14  -3  -4   -0.49    0.24
  14   3  -4   -0.08    0.27
 -14   3   4   -0.14    0.25
  13  -3  -4    0.01    0.26
 -13   3   4   -0.22    0.22
  13   3  -4    0.30    0.26
  12  -3  -4   -0.07    0.23
 -12  -3   4   -0.34    0.16
  12   3  -4   -0.01    0.24
 -12   3   4    0.12    0.23
  11  -3  -4   -0.13    0.18
 -11  -3   4    0.12    0.17
  11   3  -4    0.54    0.24
 -11   3   4    0.17    0.20
 -10  -3   4    0.55    0.19
  10  -3  -4    0.76    0.23
  10   3  -4    0.30    0.23
 -10   3   4    0.73    0.23
  -9  -3   4    3.51    0.33
   9  -3  -4    3.38    0.34
  -9   3   4    3.64    0.36
   9   3  -4    3.57    0.37
  -8  -3   4    9.54    0.46
   8  -3  -4    8.91    0.47
   8   3  -4    8.98    0.48
  -8   3   4    9.06    0.48
  -7  -3   4   -0.13    0.11
   7  -3  -4    0.26    0.16
   7   3  -4   -0.10    0.13
  -7   3   4    0.09    0.15
  -6  -3   4    0.14    0.13
  -6  -3   4    0.00    0.09
   6  -3  -4    0.16    0.14
  -6   3   4   -0.05    0.11
   6   3  -4   -0.06    0.12
  -6   3   4    0.09    0.06
   5  -3  -4    8.47    0.38
  -5  -3   4    9.16    0.37
  -5  -3   4    8.68    0.34
  -5   3   4    8.96    0.39
   5   3  -4    8.85    0.39
  -5   3   4    8.59    0.29
   5   3  -4    8.73    0.34
   4  -3  -4    4.31    0.25
  -4  -3   4    3.74    0.22
  -4  -3   4    3.76    0.22
  -4   3   4    3.82    0.19
   4   3  -4    3.81    0.23
   4   3  -4    3.96    0.24
  -4   3   4    3.80    0.23
  -3  -3   4    0.10    0.10
   3  -3  -4    0.10    0.09
  -3  -3   4    0.00    0.08
  -3   3   4    0.04    0.09
   3   3  -4    0.13    0.09
   3   3  -4    0.00    0.09
  -2  -3   4    1.48    0.16
   2  -3  -4    1.37    0.12
  -2  -3   4    1.25    0.14
  -2  -3   4    1.56    0.12
  -2   3   4    1.88    0.14
  -2   3   4    1.51    0.14
   2   3  -4    1.41    0.13
   2   3  -4    1.55    0.13
   1  -3  -4   14.85    0.42
  -1  -3   4   15.01    0.48
  -1  -3   4   12.81    0.40
  -1  -3   4   15.32    0.46
  -1   3   4   14.49    0.43
  -1   3   4   15.70    0.44
   1   3  -4   14.91    0.42
   1   3  -4   14.97    0.42
   0  -3  -4    9.85    0.30
   0  -3   4   10.18    0.34
   0  -3   4   10.11    0.37
   0   3   4    9.88    0.31
   0   3  -4   10.16    0.31
   0   3  -4    9.95    0.31
   0   3   4    9.75    0.31
  -1  -3  -4   28.08    0.70
   1  -3   4   27.83    0.72
  -1  -3  -4   28.28    0.73
   1  -3   4   27.28    0.76
   1  -3   4   28.21    0.80
   1   3   4   27.81    0.73
  -1   3  -4   28.92    0.74
  -1   3  -4   27.26    0.73
   1   3   4   28.49    0.75
   2  -3   4   54.67    1.37
  -2  -3  -4   55.23    1.34
  -2  -3  -4   54.87    1.37
   2  -3   4   54.40    1.40
   2   3   4   54.66    1.38
  -2   3  -4   56.03    1.39
   2   3   4   55.08    1.39
  -2   3  -4   55.83    1.38
  -3  -3  -4   17.09    0.51
   3  -3   4   16.22    0.52
   3   3   4   16.83    0.53
  -3   3  -4   16.92    0.52
  -4  -3  -4    0.20    0.10
   4  -3   4    0.32    0.12
  -4   3  -4    0.02    0.09
   4   3   4    0.19    0.11
   5  -3   4    4.29    0.28
  -5  -3  -4    4.55    0.27
  -5   3  -4    4.68    0.27
   5   3   4    4.44    0.27
   6  -3   4   16.88    0.60
  -6  -3  -4   16.33    0.59
   6   3   4   17.61    0.63
  -6   3  -4   16.82    0.61
   7  -3   4    2.59    0.26
   7  -3   4    2.26    0.20
  -7  -3  -4    2.54    0.26
  -7   3  -4    1.93    0.24
   7   3   4    2.34    0.27
   8  -3   4    2.00    0.27
   8  -3   4    1.82    0.18
  -8  -3  -4    1.64    0.24
   8   3   4    1.85    0.27
  -8   3  -4    2.11    0.28
   9  -3   4    0.11    0.17
  -9  -3  -4    0.10    0.18
   9  -3   4    0.02    0.10
  -9   3  -4    0.15    0.18
   9   3   4    0.05    0.20
  10  -3   4    0.24    0.20
 -10  -3  -4   -0.03    0.17
 -10   3  -4   -0.31    0.17
  10   3   4    0.11    0.22
  11  -3   4    0.43    0.23
 -11  -3  -4   -0.10    0.18
  11   3   4   -0.17    0.22
 -11   3  -4    0.58    0.25
 -12  -3  -4    1.84    0.33
  12  -3   4    1.21    0.31
 -12   3  -4    1.89    0.34
  12   3   4    1.56    0.34
  13  -3   4    0.29    0.26
 -13  -3  -4   -0.04    0.21
  13   3   4    0.04    0.25
 -13   3  -4    0.26    0.25
  13  -4  -4   -0.02    0.21
 -13   4   4   -0.03    0.25
  13   4  -4    0.04    0.25
  12  -4  -4   -0.12    0.22
  12   4  -4    0.34    0.24
 -12   4   4    0.22    0.25
 -11  -4   4    1.27    0.26
  11  -4  -4    1.68    0.31
 -11   4   4    1.40    0.30
  11   4  -4    0.92    0.28
 -10  -4   4    0.00    0.16
  10  -4  -4   -0.46    0.14
 -10   4   4   -0.06    0.19
  10   4  -4    0.13    0.21
  -9  -4   4    0.92    0.21
   9  -4  -4    1.12    0.24
  -9   4   4    0.99    0.25
   9   4  -4    0.64    0.22
  -8  -4   4   18.70    0.70
   8  -4  -4   19.51    0.72
  -8   4   4   19.68    0.74
   8   4  -4   20.98    0.77
   7  -4  -4    7.42    0.41
  -7  -4   4    7.29    0.37
   7   4  -4    7.23    0.34
   7   4  -4    7.17    0.39
  -7   4   4    6.99    0.39
  -6  -4   4   12.54    0.45
  -6  -4   4   13.00    0.48
   6  -4  -4   12.19    0.49
   6   4  -4   12.62    0.46
  -6   4   4   11.45    0.50
   6   4  -4   12.55    0.50
  -6   4   4   12.11    0.39
   5  -4  -4    0.49    0.14
  -5  -4   4    0.20    0.12
  -5  -4   4    0.33    0.12
  -5   4   4    0.33    0.12
   5   4  -4    0.24    0.11
   5   4  -4    0.51    0.13
  -5   4   4    0.29    0.09
  -4  -4   4    0.88    0.14
  -4  -4   4    0.92    0.13
   4  -4  -4    0.83    0.14
  -4   4   4    0.75    0.13
   4   4  -4    0.78    0.14
  -4   4   4    0.72    0.12
   4   4  -4    0.91    0.14
   3  -4  -4    0.14    0.09
  -3  -4   4    0.08    0.08
  -3  -4   4    0.02    0.08
  -3  -4   4    0.15    0.11
  -3  -4   4   -0.11    0.10
  -3   4   4    0.15    0.10
   3   4  -4    0.10    0.08
   3   4  -4    0.03    0.09
  -3   4   4    0.10    0.09
   3   4  -4   -0.07    0.09
  -2  -4   4   12.12    0.43
  -2  -4   4   12.08    0.44
   2  -4  -4   11.99    0.38
   2   4  -4   11.94    0.44
  -2   4   4   12.39    0.39
   2   4  -4   12.48    0.38
   2   4  -4   12.26    0.39
  -2   4   4   12.12    0.39
  -1  -4   4    1.13    0.08
  -1  -4   4    1.11    0.15
  -1  -4   4    1.15    0.15
  -1   4   4    0.96    0.11
   1   4  -4    0.93    0.10
   1   4  -4    1.12    0.10
  -1   4   4    1.04    0.11
   1   4  -4    0.90    0.14
   0  -4   4   20.50    0.51
   0  -4  -4   20.73    0.56
   0  -4   4   20.59    0.64
   0  -4   4   20.41    0.61
   0   4  -4   20.05    0.55
   0   4  -4   20.90    0.55
   0   4   4   21.21    0.56
   0   4   4   19.43    0.55
  -1  -4  -4   21.47    0.58
   1  -4   4   22.06    0.64
   1  -4   4   21.43    0.66
  -1   4  -4   21.01    0.58
   1   4   4   20.77    0.58
  -1   4  -4   21.86    0.58
   1   4   4   21.36    0.59
   2  -4   4   48.96    1.23
   2  -4   4   46.54    1.28
  -2  -4  -4   48.70    1.23
   2  -4   4   49.36    1.32
  -2  -4  -4   50.07    1.23
  -2   4  -4   50.76    1.25
   2   4   4   50.10    1.25
  -2   4  -4   49.45    1.25
   2   4   4   49.01    1.26
  -3  -4  -4   94.30    2.26
  -3  -4  -4   93.64    2.28
   3  -4   4   91.83    2.29
   3  -4   4   94.09    2.38
   3   4   4   93.34    2.31
  -3   4  -4   94.18    2.31
   4  -4   4   34.37    0.96
  -4  -4  -4   35.33    0.96
   4  -4   4   35.25    0.99
  -4   4  -4   35.03    0.98
   4   4   4   35.90    0.99
   5  -4   4   10.95    0.44
   5  -4   4   11.61    0.44
  -5  -4  -4   11.16    0.43
   5   4   4   11.38    0.45
  -5   4  -4   11.85    0.45
  -6  -4  -4   -0.03    0.12
   6  -4   4   -0.10    0.11
   6  -4   4   -0.02    0.13
   6   4   4   -0.06    0.13
  -6   4  -4    0.24    0.14
   7  -4   4    1.45    0.18
  -7  -4  -4    1.64    0.21
   7  -4   4    1.79    0.24
   7   4   4    1.67    0.23
  -7   4  -4    1.37    0.22
  -8  -4  -4    0.00    0.15
   8  -4   4    0.20    0.17
   8  -4   4    0.19    0.12
  -8   4  -4    0.32    0.20
   8   4   4    0.01    0.18
   9  -4   4   -0.15    0.16
   9  -4   4   -0.06    0.11
  -9  -4  -4   -0.12    0.15
  -9   4  -4    0.15    0.20
   9   4   4    0.13    0.20
  10  -4   4   -0.01    0.18
 -10  -4  -4   -0.11    0.16
 -10   4  -4   -0.34    0.18
  10   4   4   -0.21    0.18
 -11  -4  -4    2.18    0.31
  11  -4   4    1.56    0.31
 -11   4  -4    1.22    0.29
  11   4   4    1.38    0.31
  12  -4   4    0.32    0.22
  12   4   4    0.59    0.28
 -12   4  -4    0.06    0.23
 -13   4  -4    1.10    0.31
  13   4   4    0.91    0.33
 -13   5   4   -0.08    0.23
  13   5  -4    0.07    0.28
  12   5  -4    1.79    0.35
 -12   5   4    1.68    0.33
  11  -5  -4    0.79    0.25
 -11   5   4    0.37    0.24
  11   5  -4    0.15    0.24
  10  -5  -4    1.59    0.27
 -10  -5   4    0.94    0.21
  10   5  -4    2.00    0.31
 -10   5   4    1.18    0.27
  -9  -5   4    4.08    0.32
   9  -5  -4    3.74    0.35
   9   5  -4    3.53    0.35
  -9   5   4    3.87    0.37
   8  -5  -4    5.70    0.40
  -8  -5   4    6.38    0.36
  -8   5   4    6.38    0.43
   8   5  -4    5.57    0.41
   7  -5  -4    1.84    0.24
  -7  -5   4    1.49    0.21
   7   5  -4    1.16    0.22
  -7   5   4    1.63    0.15
  -7   5   4    0.91    0.21
  -6  -5   4    5.15    0.30
  -6  -5   4    5.52    0.29
   6  -5  -4    5.74    0.32
  -6   5   4    4.78    0.31
  -6   5   4    5.16    0.26
   6   5  -4    5.14    0.33
   5  -5  -4    0.62    0.15
  -5  -5   4    0.66    0.13
  -5  -5   4    0.61    0.15
  -5   5   4    0.83    0.13
   5   5  -4    0.63    0.15
  -5   5   4    0.74    0.16
  -4  -5   4   11.38    0.38
   4  -5  -4   11.70    0.40
  -4  -5   4   11.73    0.38
  -4  -5   4   11.77    0.46
  -4  -5   4   11.69    0.46
  -4   5   4   11.12    0.42
  -4   5   4   11.74    0.43
   4   5  -4   11.89    0.42
  -3  -5   4   10.31    0.42
  -3  -5   4   11.27    0.44
   3  -5  -4   10.94    0.36
  -3   5   4   10.69    0.39
  -3   5   4   10.80    0.41
  -3   5   4   10.67    0.38
   3   5  -4   10.25    0.37
   3   5  -4   11.56    0.37
  -2  -5   4    0.17    0.12
  -2  -5   4    0.32    0.06
  -2  -5   4    0.34    0.13
  -2   5   4    0.17    0.09
  -2   5   4    0.19    0.09
  -2   5   4    0.12    0.10
   2   5  -4    0.16    0.08
   2   5  -4    0.23    0.08
  -1  -5   4   32.99    0.97
  -1  -5   4   33.93    0.94
   1  -5  -4   32.68    0.82
  -1   5   4   33.15    0.86
   1   5  -4   33.58    0.85
  -1   5   4   33.14    0.86
   1   5  -4   32.83    0.84
   0  -5   4   14.68    0.53
   0  -5   4   15.65    0.51
   0  -5  -4   14.60    0.46
   0   5   4   14.52    0.43
   0   5  -4   15.20    0.42
   0   5  -4   14.85    0.42
   0   5   4   15.19    0.43
   0   5   4   15.18    0.43
   1  -5   4  107.95    2.67
   1  -5   4  107.16    2.75
  -1  -5  -4  107.73    2.55
  -1  -5  -4  107.89    2.60
  -1   5  -4  109.18    2.59
  -1   5  -4  107.72    2.59
   1   5   4  107.99    2.60
   1   5   4  108.14    2.60
   2  -5   4   28.17    0.85
   2  -5   4   28.33    0.84
  -2  -5  -4   28.57    0.77
   2   5   4   28.21    0.76
   2   5   4   28.68    0.78
  -2   5  -4   27.85    0.76
  -2   5  -4   28.32    0.76
   3  -5   4   19.34    0.64
   3  -5   4   19.37    0.55
  -3  -5  -4   19.48    0.55
  -3  -5  -4   19.07    0.58
   3   5   4   19.21    0.59
  -3   5  -4   20.10    0.59
  -3   5  -4   19.43    0.59
   3   5   4   19.49    0.58
  -4  -5  -4    3.30    0.21
   4  -5   4    3.41    0.26
  -4  -5  -4    3.56    0.22
   4  -5   4    3.08    0.22
  -4   5  -4    3.27    0.24
   4   5   4    3.08    0.25
   5  -5   4   -0.10    0.10
  -5  -5  -4    0.10    0.11
   5  -5   4   -0.07    0.11
  -5   5  -4   -0.08    0.10
   5   5   4    0.10    0.12
   6  -5   4    5.33    0.31
  -6  -5  -4    5.36    0.31
   6  -5   4    5.77    0.33
  -6   5  -4    5.69    0.33
   6   5   4    5.24    0.35
   7  -5   4    5.09    0.35
   7  -5   4    5.04    0.31
  -7  -5  -4    5.35    0.33
   7   5   4    5.67    0.38
  -7   5  -4    5.43    0.35
   8  -5   4   -0.03    0.12
  -8  -5  -4   -0.08    0.15
   8  -5   4    0.31    0.18
   8   5   4   -0.16    0.15
  -8   5  -4    0.02    0.17
   9  -5   4    3.22    0.33
   9  -5   4    3.51    0.26
  -9  -5  -4    3.69    0.34
  -9   5  -4    2.71    0.33
   9   5   4    4.01    0.40
 -10  -5  -4    0.16    0.19
  10  -5   4    0.40    0.20
 -10   5  -4    0.05    0.19
  10   5   4    0.47    0.22
  11  -5   4   -0.02    0.18
 -11   5  -4    0.56    0.26
  11   5   4    0.59    0.26
 -12   5  -4    0.21    0.24
  12   5   4    0.70    0.30
 -13   5  -4    0.47    0.27
  13   5   4    0.23    0.26
  13   6  -4    0.19    0.27
 -13   6   4    0.01    0.27
 -12   6   4    0.02    0.23
  12   6  -4   -0.19    0.21
 -11   6   4    1.50    0.32
  11   6  -4    1.29    0.29
  10   6  -4    0.42    0.23
 -10   6   4    0.39    0.22
   9  -6  -4    1.15    0.24
  -9   6   4    0.64    0.23
   9   6  -4    0.76    0.23
  -8  -6   4    1.66    0.22
   8  -6  -4    1.72    0.24
   8   6  -4    1.86    0.26
  -8   6   4    2.04    0.28
   7  -6  -4    0.25    0.16
  -7  -6   4   -0.02    0.13
  -7   6   4    0.17    0.17
   7   6  -4   -0.14    0.16
  -7   6   4    0.20    0.12
  -6  -6   4    1.46    0.21
   6  -6  -4    1.57    0.20
  -6  -6   4    1.31    0.16
   6   6  -4    1.33    0.21
  -6   6   4    1.18    0.20
  -6   6   4    1.56    0.18
  -5  -6   4    0.40    0.16
   5  -6  -4    0.40    0.13
  -5  -6   4    0.47    0.11
  -5  -6   4    0.54    0.18
  -5   6   4    0.35    0.14
   5   6  -4    0.47    0.15
   4  -6  -4    3.49    0.21
  -4  -6   4    3.35    0.28
  -4  -6   4    3.60    0.29
   4   6  -4    3.42    0.23
  -4   6   4    3.30    0.25
   4   6  -4    3.40    0.23
  -3  -6   4    7.10    0.37
  -3  -6   4    7.72    0.37
  -3   6   4    7.48    0.31
  -3   6   4    7.31    0.31
   3   6  -4    7.11    0.30
   3   6  -4    7.38    0.29
  -2  -6   4   16.64    0.60
   2  -6  -4   16.47    0.44
  -2  -6   4   15.75    0.57
  -2   6   4   16.33    0.50
   2   6  -4   16.89    0.48
  -2   6   4   16.84    0.50
   2   6  -4   16.76    0.48
  -1  -6   4    4.32    0.30
  -1  -6   4    4.29    0.27
   1   6  -4    4.44    0.18
  -1   6   4    4.22    0.20
   1   6  -4    4.41    0.19
  -1   6   4    4.66    0.21
   0  -6   4    1.11    0.17
   0  -6  -4    0.86    0.14
   0  -6   4    0.98    0.17
   0   6   4    0.69    0.10
   0   6  -4    0.86    0.09
   0   6   4    0.86    0.10
   0   6  -4    0.83    0.09
   0   6   4    0.99    0.10
   1  -6   4    0.80    0.16
  -1  -6  -4    0.64    0.13
   1  -6   4    0.50    0.15
  -1   6  -4    0.71    0.09
  -1   6  -4    0.75    0.10
   1   6   4    0.74    0.10
   1   6   4    0.73    0.10
  -2  -6  -4    2.42    0.20
   2  -6   4    3.12    0.26
   2  -6   4    3.00    0.26
  -2   6  -4    2.89    0.19
  -2   6  -4    3.01    0.19
   2   6   4    3.17    0.19
   2   6   4    3.17    0.20
   3  -6   4    0.14    0.13
  -3  -6  -4    0.48    0.12
  -3  -6  -4    0.27    0.07
   3  -6   4    0.15    0.06
  -3   6  -4    0.31    0.11
   3   6   4    0.25    0.11
  -3   6  -4    0.33    0.10
   3   6   4    0.40    0.11
   4  -6   4   13.47    0.44
   4  -6   4   13.24    0.51
  -4  -6  -4   13.05    0.46
   4   6   4   13.08    0.48
  -4   6  -4   13.09    0.48
   5  -6   4    3.81    0.25
  -5  -6  -4    4.03    0.26
  -5  -6  -4    3.62    0.23
   5  -6   4    3.50    0.26
  -5   6  -4    3.15    0.26
   5   6   4    3.73    0.28
   6  -6   4    3.11    0.26
   6  -6   4    3.47    0.28
  -6  -6  -4    3.41    0.25
  -6  -6  -4    3.13    0.27
   6   6   4    3.30    0.29
  -6   6  -4    2.95    0.29
   7  -6   4    0.43    0.16
   7  -6   4    0.57    0.16
  -7  -6  -4    0.45    0.15
   7   6   4    0.26    0.17
  -7   6  -4    0.27    0.18
  -8  -6  -4    0.50    0.16
   8  -6   4    0.23    0.15
   8  -6   4    0.14    0.14
   8   6   4   -0.02    0.18
  -8   6  -4    0.30    0.18
   9  -6   4    0.70    0.17
   9  -6   4    1.23    0.23
   9   6   4    0.83    0.23
  -9   6  -4    0.88    0.25
  10   6   4    1.29    0.28
 -10   6  -4    1.46    0.30
  11   6   4    1.45    0.32
 -11   6  -4    1.17    0.28
 -12   6  -4    0.10    0.25
  12   6   4    0.14    0.26
 -13   6  -4   -0.05    0.26
  13   6   4    0.24    0.28
 -13   7   4    2.03    0.38
 -12   7   4    0.68    0.28
  12   7  -4    0.25    0.27
 -11   7   4    8.86    0.57
  11   7  -4    8.05    0.55
  10   7  -4    0.88    0.26
 -10   7   4    0.42    0.23
   9   7  -4    8.02    0.49
  -9   7   4    8.19    0.50
  -8   7   4    0.29    0.19
   8   7  -4    0.28    0.20
   7  -7  -4    0.32    0.16
  -7  -7   4    0.42    0.20
   7   7  -4    0.41    0.19
  -7   7   4    0.17    0.18
  -6  -7   4    0.18    0.16
  -6  -7   4   -0.22    0.16
  -6  -7   4    0.01    0.07
   6  -7  -4   -0.19    0.12
  -6  -7   4    0.01    0.07
  -6   7   4    0.07    0.15
   6   7  -4    0.13    0.16
   5  -7  -4    6.47    0.30
  -5  -7   4    6.74    0.39
  -5  -7   4    6.41    0.38
  -5  -7   4    6.88    0.26
  -5   7   4    6.60    0.35
   5   7  -4    7.03    0.35
  -4  -7   4    0.24    0.16
   4  -7  -4    0.03    0.04
  -4  -7   4    0.62    0.18
   4   7  -4    0.33    0.11
  -4   7   4    0.32    0.13
   4   7  -4    0.23    0.12
   3  -7  -4    5.81    0.21
  -3  -7   4    6.14    0.35
  -3  -7   4    5.31    0.35
   3   7  -4    5.89    0.27
  -3   7   4    5.53    0.28
   3   7  -4    5.77    0.25
  -3   7   4    5.70    0.28
  -2  -7   4   14.13    0.57
  -2  -7   4   13.81    0.53
   2   7  -4   14.04    0.42
  -2   7   4   13.13    0.43
  -2   7   4   13.74    0.44
   2   7  -4   13.90    0.42
  -1  -7   4    4.91    0.31
  -1  -7   4    4.66    0.32
  -1   7   4    5.59    0.22
   1   7  -4    4.48    0.19
   1   7  -4    5.09    0.20
  -1   7   4    5.06    0.22
   0  -7   4   21.72    0.72
   0  -7   4   22.65    0.76
   0  -7  -4   21.57    0.68
   0   7  -4   21.72    0.58
   0   7   4   22.16    0.60
   0   7   4   21.23    0.59
   0   7   4   22.18    0.60
   0   7  -4   21.97    0.58
  -1  -7  -4    3.50    0.24
   1  -7   4    3.36    0.27
   1  -7   4    3.22    0.29
   1   7   4    3.28    0.19
  -1   7  -4    3.51    0.18
  -1   7  -4    3.30    0.17
   1   7   4    3.15    0.18
  -2  -7  -4    0.90    0.15
   2  -7   4    0.82    0.19
   2  -7   4    0.70    0.18
  -2   7  -4    0.79    0.11
   2   7   4    0.76    0.12
  -2   7  -4    0.82    0.11
   2   7   4    0.72    0.11
   3  -7   4    0.19    0.14
  -3  -7  -4    0.06    0.12
  -3   7  -4    0.17    0.11
  -3   7  -4    0.11    0.09
   3   7   4    0.10    0.10
   3   7   4    0.04    0.10
  -4  -7  -4   11.73    0.37
  -4  -7  -4   11.41    0.45
   4  -7   4   11.86    0.51
   4  -7   4   12.27    0.38
  -4   7  -4   12.18    0.46
   4   7   4   11.89    0.44
   4   7   4   11.86    0.45
   5  -7   4    5.05    0.27
   5  -7   4    4.87    0.35
  -5  -7  -4    4.85    0.29
  -5   7  -4    5.38    0.33
   5   7   4    5.39    0.32
  -6  -7  -4    0.95    0.19
   6  -7   4    1.36    0.21
   6  -7   4    1.08    0.17
  -6  -7  -4    1.32    0.17
   6   7   4    0.61    0.19
  -6   7  -4    1.05    0.21
  -7  -7  -4    2.89    0.28
   7  -7   4    3.02    0.28
  -7   7  -4    2.67    0.30
   7   7   4    2.97    0.31
  -8  -7  -4    1.93    0.25
   8  -7   4    3.10    0.28
  -8   7  -4    3.35    0.34
   8   7   4    2.26    0.30
   9  -7   4   -0.08    0.14
  -9   7  -4   -0.21    0.18
   9   7   4   -0.32    0.17
  10   7   4    0.19    0.22
 -10   7  -4    0.75    0.25
  11   7   4    0.33    0.24
 -11   7  -4    0.06    0.21
  12   7   4   -0.37    0.22
 -12   7  -4   -0.13    0.23
  12   8  -4   -0.40    0.23
 -12   8   4    0.36    0.27
 -11   8   4    0.10    0.23
  11   8  -4    0.10    0.25
 -10  -8   4    0.35    0.24
 -10   8   4    0.40    0.22
  10   8  -4    0.07    0.21
  -9  -8   4    0.04    0.22
  -9   8   4   -0.08    0.18
   9   8  -4   -0.02    0.19
  -8  -8   4    0.80    0.24
   8   8  -4    0.45    0.20
  -8   8   4    0.69    0.21
  -7  -8   4    0.10    0.19
   7   8  -4    0.39    0.18
  -7   8   4    0.15    0.16
  -6  -8   4    0.20    0.20
   6   8  -4    0.62    0.18
  -6   8   4    0.63    0.18
  -5  -8   4    0.51    0.19
  -5  -8   4    0.58    0.20
   5   8  -4    0.95    0.17
  -5   8   4    0.72    0.17
  -4  -8   4    0.25    0.19
  -4  -8   4    0.00    0.14
  -4   8   4    0.23    0.13
   4   8  -4    0.09    0.10
   4   8  -4   -0.04    0.11
  -4   8   4    0.14    0.12
  -3  -8   4   20.80    0.77
  -3  -8   4   19.74    0.73
   3   8  -4   20.72    0.61
  -3   8   4   20.82    0.63
  -3   8   4   20.83    0.63
   3   8  -4   20.88    0.60
  -2  -8   4    2.94    0.30
  -2  -8   4    2.74    0.29
   2   8  -4    3.28    0.18
   2   8  -4    3.45    0.19
  -2   8   4    2.57    0.20
  -2   8   4    3.39    0.20
  -1  -8   4    3.91    0.32
  -1  -8   4    3.05    0.29
   1   8  -4    3.63    0.17
   1   8  -4    3.86    0.17
  -1   8   4    3.68    0.19
  -1   8   4    3.10    0.19
   0  -8  -4    1.66    0.21
   0  -8   4    1.87    0.24
   0  -8   4    1.93    0.25
   0   8  -4    1.94    0.13
   0   8   4    1.87    0.15
   0   8   4    2.07    0.16
   0   8  -4    1.91    0.13
   1  -8   4    4.12    0.32
   1  -8   4    4.09    0.33
  -1  -8  -4    4.23    0.28
   1   8   4    4.14    0.21
   1   8   4    4.28    0.21
  -1   8  -4    4.20    0.19
  -1   8  -4    4.16    0.20
   2  -8   4    7.88    0.42
   2  -8   4    8.37    0.44
  -2  -8  -4    7.96    0.37
   2   8   4    8.03    0.31
   2   8   4    8.56    0.33
  -2   8  -4    8.33    0.31
  -2   8  -4    8.37    0.31
   3  -8   4   20.00    0.73
  -3  -8  -4   19.75    0.66
  -3   8  -4   19.45    0.61
   3   8   4   20.46    0.60
   3   8   4   19.40    0.61
  -3   8  -4   19.86    0.61
   4  -8   4    0.80    0.19
  -4  -8  -4    0.91    0.18
  -4   8  -4    0.77    0.16
   4   8   4    1.01    0.17
   5  -8   4    1.62    0.24
  -5  -8  -4    1.53    0.22
  -5   8  -4    1.75    0.22
   5   8   4    1.78    0.22
   6  -8   4    0.79    0.20
  -6  -8  -4    1.03    0.20
   6   8   4    0.86    0.20
  -6   8  -4    1.03    0.21
   7  -8   4    0.30    0.17
  -7  -8  -4   -0.04    0.15
  -7   8  -4    0.04    0.17
   7   8   4    0.14    0.16
  -8  -8  -4    0.15    0.17
   8  -8   4    0.01    0.16
  -8   8  -4   -0.03    0.18
   8   8   4    0.07    0.18
   9  -8   4    0.38    0.18
  -9  -8  -4    0.65    0.21
   9   8   4    0.20    0.21
  -9   8  -4    0.69    0.24
 -10  -8  -4    0.54    0.21
 -10   8  -4    0.17    0.23
  10   8   4    0.19    0.23
 -11  -8  -4   -0.16    0.18
  11   8   4    0.25    0.24
 -11   8  -4   -0.63    0.18
 -12  -8  -4   -0.17    0.21
  12   8   4   -0.31    0.24
 -12   8  -4   -0.13    0.24
 -12   9   4    1.79    0.37
 -11  -9   4    0.34    0.26
 -11   9   4    0.41    0.26
  11   9  -4    0.62    0.28
 -10  -9   4    0.35    0.23
 -10   9   4    0.14    0.22
  10   9  -4   -0.30    0.21
  -9  -9   4    0.38    0.23
  -9   9   4    0.25    0.20
   9   9  -4    0.58    0.23
  -8  -9   4    0.17    0.21
   8   9  -4    0.30    0.20
  -8   9   4    0.62    0.21
  -7  -9   4    1.52    0.27
  -7   9   4    1.65    0.25
   7   9  -4    1.48    0.24
  -6  -9   4    6.75    0.44
   6   9  -4    7.51    0.40
  -6   9   4    7.32    0.41
  -5  -9   4    1.68    0.27
  -5  -9   4    2.01    0.29
   5   9  -4    1.69    0.21
  -5   9   4    1.81    0.22
  -4  -9   4    2.65    0.32
  -4  -9   4    2.27    0.30
   4   9  -4    2.05    0.20
  -4   9   4    2.20    0.22
  -3  -9   4    6.74    0.45
  -3  -9   4    7.52    0.44
   3   9  -4    6.07    0.28
  -3   9   4    7.16    0.32
   3   9  -4    7.06    0.30
  -2  -9   4    0.97    0.22
  -2  -9   4    0.93    0.21
   2   9  -4    1.01    0.12
  -2   9   4    0.97    0.13
   2   9  -4    1.04    0.11
  -2   9   4    1.22    0.14
  -1  -9   4   15.80    0.67
  -1  -9   4   15.24    0.63
  -1   9   4   16.52    0.49
   1   9  -4   16.50    0.46
  -1   9   4   16.54    0.49
   1   9  -4   16.23    0.46
   0  -9  -4    6.49    0.36
   0  -9   4    6.91    0.43
   0  -9   4    6.47    0.40
   0   9  -4    6.70    0.24
   0   9  -4    6.79    0.24
   0   9   4    6.83    0.26
   0   9   4    6.67    0.26
   1  -9   4   -0.30    0.14
   1  -9   4   -0.04    0.16
  -1  -9  -4    0.06    0.14
   1   9   4    0.01    0.08
  -1   9  -4    0.04    0.07
   1   9   4    0.20    0.09
  -1   9  -4    0.06    0.08
   2  -9   4   15.24    0.65
  -2  -9  -4   16.04    0.58
   2  -9   4   15.45    0.65
   2   9   4   15.67    0.50
  -2   9  -4   15.70    0.49
  -2   9  -4   16.37    0.49
   2   9   4   15.63    0.49
   3  -9   4    0.33    0.19
  -3  -9  -4    0.19    0.16
   3   9   4    0.33    0.12
  -3   9  -4    0.44    0.13
   4  -9   4    1.24    0.25
  -4  -9  -4    1.40    0.22
  -4   9  -4    1.58    0.20
   4   9   4    1.53    0.19
   5  -9   4    1.12    0.24
  -5  -9  -4    0.99    0.20
  -5   9  -4    1.15    0.20
   5   9   4    1.29    0.20
   6  -9   4    1.19    0.23
  -6  -9  -4    1.50    0.23
   6   9   4    0.97    0.21
  -6   9  -4    0.96    0.21
   7  -9   4    1.40    0.25
  -7  -9  -4    1.66    0.25
   7   9   4    1.71    0.26
  -7   9  -4    1.69    0.26
  -8  -9  -4   -0.07    0.17
   8  -9   4   -0.10    0.16
   8   9   4    0.22    0.20
  -8   9  -4   -0.08    0.18
  -9  -9  -4    0.27    0.19
  -9   9  -4    0.03    0.21
   9   9   4    0.17    0.21
 -10  -9  -4    0.16    0.21
  10   9   4    0.19    0.22
 -10   9  -4    0.27    0.23
 -11  -9  -4    0.68    0.25
  11   9   4    0.15    0.25
 -11   9  -4    0.12    0.25
 -11 -10   4   -0.13    0.24
 -11  10   4   -0.27    0.22
  11  10  -4    0.05    0.24
 -10 -10   4    0.58    0.27
  10  10  -4    0.39    0.26
 -10  10   4    0.50    0.25
  -9 -10   4    0.01    0.20
   9  10  -4   -0.01    0.21
  -9  10   4   -0.08    0.20
  -8 -10   4    1.48    0.30
  -8  10   4    1.74    0.28
   8  10  -4    1.47    0.27
  -7 -10   4    0.19    0.21
   7  10  -4    0.40    0.19
  -7  10   4    0.31    0.18
  -6 -10   4    0.13    0.19
  -6  10   4   -0.22    0.14
   6  10  -4   -0.16    0.13
  -5 -10   4    0.17    0.19
   5  10  -4    0.18    0.14
  -5  10   4    0.20    0.15
  -4 -10   4    1.20    0.26
  -4 -10   4    1.45    0.28
  -4  10   4    1.79    0.20
   4  10  -4    1.64    0.18
  -3 -10   4    2.72    0.33
  -3 -10   4    3.67    0.36
  -3  10   4    3.21    0.23
   3  10  -4    3.87    0.23
  -2 -10   4    3.95    0.39
  -2 -10   4    4.39    0.39
  -2  10   4    4.41    0.24
   2  10  -4    4.23    0.20
   2  10  -4    4.80    0.22
  -1 -10   4    7.19    0.46
  -1 -10   4    7.23    0.46
   1  10  -4    6.46    0.24
  -1  10   4    7.20    0.28
   1  10  -4    6.69    0.25
   1  10  -4    6.72    0.24
   0 -10  -4   -0.23    0.15
   0 -10   4    0.22    0.19
   0 -10   4    0.12    0.18
   0  10   4   -0.03    0.08
   0  10  -4   -0.06    0.07
   0  10  -4    0.01    0.06
   0  10   4   -0.07    0.08
  -1 -10  -4    4.58    0.34
   1 -10   4    5.08    0.44
   1 -10   4    5.43    0.39
  -1  10  -4    5.56    0.23
  -1  10  -4    5.43    0.23
   1  10   4    4.99    0.24
   1  10   4    5.76    0.26
   2 -10   4    4.84    0.40
   2 -10   4    4.88    0.40
  -2 -10  -4    4.76    0.33
  -2  10  -4    5.20    0.25
   2  10   4    4.68    0.25
   3 -10   4    4.64    0.41
  -3 -10  -4    4.05    0.31
  -3  10  -4    4.43    0.27
   3  10   4    4.17    0.26
   4 -10   4    4.26    0.39
  -4 -10  -4    3.82    0.30
  -4  10  -4    3.23    0.26
   4  10   4    3.47    0.27
   5 -10   4    0.61    0.21
  -5 -10  -4    0.03    0.16
   5  10   4    0.58    0.17
  -5  10  -4    0.48    0.17
  -6 -10  -4    0.20    0.18
   6 -10   4    0.48    0.21
  -6  10  -4    0.30    0.18
   6  10   4    0.62    0.19
  -7 -10  -4    0.10    0.19
   7 -10   4    0.25    0.19
  -7  10  -4   -0.08    0.17
   7  10   4    0.10    0.18
  -8 -10  -4    1.29    0.25
   8 -10   4    1.33    0.27
   8  10   4    1.58    0.28
  -8  10  -4    1.08    0.26
  -9 -10  -4    0.32    0.20
  -9  10  -4    0.63    0.26
   9  10   4    0.59    0.25
 -10 -10  -4    1.82    0.30
  10  10   4    2.28    0.35
 -10  10  -4    2.55    0.36
 -11 -10  -4    0.36    0.22
  11  10   4    0.44    0.26
 -11  10  -4    0.45    0.27
 -10 -11   4   -0.40    0.21
 -10  11   4   -0.21    0.22
  10  11  -4   -0.08    0.23
  -9 -11   4   -0.04    0.24
  -9  11   4    0.42    0.23
   9  11  -4    0.15    0.21
  -8 -11   4    0.97    0.29
  -8  11   4    0.86    0.25
   8  11  -4    0.50    0.22
  -7 -11   4   -0.17    0.21
  -7  11   4    0.01    0.18
   7  11  -4    0.00    0.18
  -6 -11   4    0.10    0.21
  -6  11   4   -0.05    0.16
   6  11  -4    0.29    0.16
  -5 -11   4    0.04    0.20
   5  11  -4    0.11    0.14
  -5  11   4    0.17    0.15
  -4 -11   4   10.36    0.55
  -4 -11   4    9.58    0.56
   4  11  -4   10.41    0.42
  -4  11   4   10.19    0.43
  -3 -11   4    0.10    0.19
  -3 -11   4    0.05    0.19
   3  11  -4   -0.11    0.10
  -3  11   4    0.03    0.12
  -2 -11   4    4.20    0.41
  -2 -11   4    4.59    0.42
   2  11  -4    4.28    0.21
  -2  11   4    4.00    0.24
  -1 -11   4    0.17    0.21
  -1 -11   4   -0.02    0.19
  -1  11   4    0.16    0.10
   1  11  -4    0.08    0.07
   0 -11  -4    0.08    0.18
   0 -11   4    0.21    0.20
   0 -11   4   -0.03    0.19
   0  11   4   -0.02    0.09
   0  11  -4   -0.02    0.07
   1 -11   4    6.90    0.47
  -1 -11  -4    6.95    0.42
   1 -11   4    6.66    0.46
  -1  11  -4    6.58    0.26
   1  11   4    6.75    0.29
   2 -11   4    0.05    0.21
   2 -11   4    0.55    0.22
  -2 -11  -4    0.16    0.17
   2  11   4    0.10    0.10
  -2  11  -4    0.18    0.10
   3 -11   4    0.65    0.24
  -3 -11  -4    0.52    0.19
  -3  11  -4    0.36    0.13
   3  11   4    0.36    0.13
  -4 -11  -4    0.18    0.18
   4 -11   4    0.43    0.22
   4  11   4    0.60    0.15
  -4  11  -4    0.55    0.15
   5 -11   4   -0.13    0.18
  -5 -11  -4    0.17    0.17
  -5  11  -4    0.03    0.14
   5  11   4    0.07    0.14
  -6 -11  -4    0.12    0.17
   6 -11   4   -0.53    0.17
  -6  11  -4    0.02    0.16
   6  11   4    0.31    0.18
  -7 -11  -4    4.00    0.37
   7 -11   4    3.36    0.38
  -7  11  -4    3.58    0.35
   7  11   4    3.42    0.34
  -8 -11  -4    0.70    0.23
   8 -11   4    0.77    0.24
   8  11   4    0.66    0.23
  -8  11  -4    0.80    0.24
  -9 -11  -4    1.07    0.26
  -9  11  -4    1.07    0.28
   9  11   4    0.94    0.26
 -10 -11  -4    0.00    0.21
  10  11   4   -0.14    0.23
 -10  11  -4    0.63    0.25
  -9 -12   4    0.64    0.28
  -9  12   4    0.64    0.25
   9  12  -4    0.15    0.23
  -8 -12   4    0.41    0.26
   8  12  -4    0.19    0.20
  -8  12   4    0.13    0.21
  -7 -12   4    0.48    0.26
   7  12  -4    0.07    0.18
  -7  12   4    0.56    0.21
  -6 -12   4    0.46    0.25
  -6  12   4    0.28    0.18
   6  12  -4    0.31    0.17
  -5 -12   4    0.17    0.22
   5  12  -4    0.21    0.15
  -5  12   4    0.28    0.17
  -4 -12   4    0.43    0.24
   4  12  -4    0.32    0.14
  -4  12   4    0.13    0.15
  -3 -12   4    1.04    0.28
  -3 -12   4    1.17    0.29
   3  12  -4    1.08    0.14
  -3  12   4    1.05    0.17
  -2 -12   4    1.60    0.30
  -2 -12   4    2.08    0.31
   2  12  -4    1.58    0.13
  -2  12   4    1.52    0.17
  -1 -12   4    0.44    0.23
  -1 -12   4    0.30    0.22
   1  12  -4    0.33    0.08
  -1  12   4    0.21    0.10
   0 -12   4    1.02    0.28
   0 -12   4    0.91    0.26
   0  12  -4    0.92    0.10
   0  12   4    0.91    0.13
   1 -12   4   -0.17    0.20
   1 -12   4    0.21    0.22
  -1 -12  -4    0.09    0.18
   1  12   4    0.05    0.10
  -1  12  -4    0.15    0.08
   2 -12   4    0.31    0.23
  -2 -12  -4    0.64    0.21
   2 -12   4    0.50    0.25
  -2  12  -4    0.50    0.12
   2  12   4    0.60    0.13
  -3 -12  -4    0.49    0.21
   3 -12   4    0.47    0.25
   3  12   4    0.35    0.13
  -3  12  -4    0.31    0.13
  -4 -12  -4    0.54    0.21
   4 -12   4    0.46    0.24
   4  12   4    0.54    0.15
  -4  12  -4    0.39    0.15
   5 -12   4    0.19    0.22
  -5 -12  -4    0.42    0.20
  -5  12  -4    0.09    0.15
   5  12   4    0.21    0.15
  -6 -12  -4    0.91    0.24
   6 -12   4    1.31    0.29
  -6  12  -4    1.02    0.22
   6  12   4    1.06    0.22
   7 -12   4    0.33    0.23
  -7 -12  -4    0.51    0.22
   7  12   4    0.53    0.20
  -7  12  -4    0.50    0.20
   8 -12   4    2.79    0.36
  -8 -12  -4    1.51    0.30
  -8  12  -4    2.31    0.32
   8  12   4    2.03    0.31
  -9 -12  -4    2.81    0.36
   9  12   4    2.72    0.36
  -9  12  -4    2.43    0.35
  -8 -13   4   -0.14    0.24
   8  13  -4   -0.03    0.20
  -8  13   4    0.29    0.22
  -7 -13   4    0.24    0.26
   7  13  -4   -0.06    0.18
  -7  13   4   -0.09    0.18
  -6 -13   4    0.26    0.23
   6  13  -4    0.05    0.16
  -6  13   4   -0.05    0.17
  -5 -13   4   -0.27    0.19
  -5  13   4    0.08    0.16
   5  13  -4    0.07    0.15
  -4 -13   4    0.07    0.22
  -4  13   4    0.15    0.15
   4  13  -4    0.21    0.13
  -3 -13   4    1.21    0.30
   3  13  -4    1.06    0.14
  -3  13   4    1.37    0.18
  -2 -13   4    0.29    0.23
  -2 -13   4    0.39    0.24
  -2  13   4    0.49    0.13
   2  13  -4    0.45    0.09
  -1 -13   4    5.38    0.49
  -1 -13   4    4.74    0.48
  -1  13   4    4.86    0.26
   0 -13   4    1.05    0.31
   0 -13   4    0.97    0.29
   0  13   4    1.30    0.14
  -1 -13  -4    0.00    0.18
   1 -13   4    0.13    0.22
   1 -13   4   -0.04    0.21
  -1  13  -4   -0.02    0.08
   1  13   4    0.14    0.11
  -2 -13  -4    0.45    0.22
   2 -13   4   -0.09    0.21
   2  13   4    0.19    0.11
  -2  13  -4    0.16    0.10
  -3 -13  -4    0.45    0.22
   3 -13   4    0.22    0.23
  -3  13  -4    0.38    0.13
   3  13   4    0.12    0.12
  -4 -13  -4    0.10    0.18
   4 -13   4    0.29    0.25
   4  13   4    0.27    0.14
  -4  13  -4    0.26    0.15
   5 -13   4   -0.29    0.22
  -5 -13  -4    0.25    0.21
   5  13   4    0.46    0.17
  -5  13  -4    0.16    0.16
   6 -13   4    1.21    0.31
  -6 -13  -4    0.90    0.25
   6  13   4    1.51    0.24
  -6  13  -4    1.00    0.23
   7 -13   4    0.07    0.25
  -7 -13  -4    0.15    0.22
  -7  13  -4    0.14    0.19
   7  13   4    0.35    0.20
  -8 -13  -4    1.38    0.30
  -8  13  -4    1.05    0.26
   8  13   4    1.48    0.28
  -7 -14   4   -0.07    0.25
  -7  14   4    0.37    0.23
   7  14  -4    0.04    0.20
  -6 -14   4    0.91    0.30
   6  14  -4    0.78    0.21
  -6  14   4    0.85    0.23
  -5 -14   4   -0.16    0.21
   5  14  -4    0.25    0.15
  -5  14   4    0.02    0.16
  -4 -14   4    0.28    0.25
  -4  14   4    0.15    0.16
   4  14  -4    0.33    0.13
  -3 -14   4   -0.25    0.22
  -3  14   4    0.26    0.14
   3  14  -4    0.10    0.10
  -2 -14   4    0.45    0.26
  -2  14   4    0.88    0.15
  -2  14   4    1.06    0.15
  -1 -14   4    1.07    0.30
  -1  14   4    0.71    0.13
   0 -14   4   -0.03    0.23
   0 -14   4    0.60    0.27
   0  14   4    0.36    0.11
   1 -14   4    0.16    0.26
  -1 -14  -4   -0.16    0.19
   1 -14   4    0.17    0.25
   1  14   4    0.03    0.10
   2 -14   4    0.16    0.26
  -2 -14  -4   -0.02    0.20
   2  14   4    0.36    0.12
  -2  14  -4    0.21    0.10
   3 -14   4   -0.13    0.24
  -3 -14  -4    0.36    0.23
   3  14   4   -0.09    0.12
  -3  14  -4    0.29    0.13
   4 -14   4   -0.06    0.24
  -4 -14  -4   -0.30    0.19
   4  14   4    0.19    0.15
  -4  14  -4    0.11    0.15
  -5 -14  -4    0.40    0.25
   5 -14   4    1.06    0.31
  -5  14  -4    0.43    0.18
   5  14   4    0.34    0.17
  -6 -14  -4   -0.37    0.18
   6 -14   4   -0.28    0.23
  -6  14  -4    0.19    0.18
   6  14   4    0.13    0.18
  -7 -14  -4    0.07    0.23
  -7  14  -4    0.38    0.20
   7  14   4   -0.19    0.18
  -5 -15   4    0.21    0.28
  -5  15   4    0.43    0.20
  -4 -15   4   -0.01    0.27
  -4  15   4    0.16    0.16
  -3 -15   4    0.53    0.29
  -3  15   4   -0.17    0.13
  -2 -15   4    0.16    0.27
  -1 -15   4   -0.06    0.24
   0 -15   4    0.36    0.26
   1 -15   4    0.21    0.27
  -2 -15  -4    0.62    0.25
  -3 -15  -4   -0.51    0.18
  -4 -15  -4    0.26    0.25
  -4  15  -4    0.69    0.17
   4  15   4    0.13    0.15
  -5 -15  -4   -0.12    0.22
  -5  15  -4   -0.11    0.15
   5  15   4    0.15    0.16
  -2 -16   4    0.17    0.28
  -1 -16   4    0.28    0.29
   0 -16   4    0.28    0.27
  -2 -16  -4   -0.47    0.22
 -14   0   5   -0.29    0.24
  14   0  -5   -0.09    0.24
  13   0  -5   -0.37    0.24
 -13   0   5    0.27    0.24
 -12   0   5    0.21    0.22
  12   0  -5    0.15    0.23
 -11   0   5    0.15    0.20
  11   0  -5    0.60    0.23
 -10   0   5   -0.08    0.17
  10   0  -5   -0.17    0.18
  -9   0   5    1.00    0.24
   9   0  -5    0.80    0.24
   8   0  -5   -0.18    0.16
  -8   0   5   -0.02    0.15
  -7   0   5    0.16    0.14
   7   0  -5    0.09    0.16
   6   0  -5    0.00    0.13
  -6   0   5    0.00    0.12
  -6   0   5    0.04    0.04
  -5   0   5   15.84    0.55
  -5   0   5   16.03    0.44
   5   0  -5   15.91    0.56
  -4   0   5   -0.09    0.11
   4   0  -5    0.13    0.12
  -3   0   5   21.98    0.64
   3   0  -5   21.03    0.63
   2   0  -5   -0.08    0.09
  -2   0   5    0.06    0.09
   1   0  -5   15.33    0.45
  -1   0   5   15.01    0.45
   0   0   5   -0.06    0.05
   0   0   5    0.01    0.08
   0   0  -5   -0.05    0.08
  -1   0  -5   59.16    1.40
   1   0   5   58.72    1.48
  -1   0  -5   59.26    1.47
   1   0   5   58.58    1.40
  -2   0  -5    0.05    0.08
   2   0   5   -0.03    0.09
  -3   0  -5    5.17    0.27
   3   0   5    5.46    0.26
   4   0   5   -0.05    0.11
  -4   0  -5    0.07    0.10
   5   0   5   10.65    0.44
  -5   0  -5   10.24    0.42
   6   0   5    0.05    0.14
  -6   0  -5   -0.06    0.11
  -7   0  -5    2.18    0.25
   7   0   5    1.81    0.24
   8   0   5   -0.05    0.18
  -8   0  -5   -0.01    0.15
  -9   0  -5    3.86    0.36
   9   0   5    4.22    0.38
  10   0   5    0.04    0.20
 -10   0  -5   -0.03    0.18
 -11   0  -5   -0.05    0.20
  11   0   5    0.14    0.23
 -12   0  -5    0.03    0.22
  12   0   5    0.19    0.25
 -13   0  -5   -0.44    0.21
  13   0   5   -0.23    0.24
 -14   0  -5   -0.22    0.24
  14   0   5   -0.19    0.28
  14  -1  -5   -0.28    0.27
 -14  -1   5   -0.35    0.21
  14   1  -5    0.66    0.32
 -14   1   5   -0.03    0.22
 -13  -1   5   -0.07    0.22
  13  -1  -5   -0.24    0.23
  13   1  -5   -0.19    0.26
 -13   1   5   -0.22    0.22
  12  -1  -5    0.26    0.25
 -12  -1   5    0.28    0.22
  12   1  -5    0.41    0.27
 -12   1   5    0.29    0.21
  11  -1  -5    0.78    0.27
 -11  -1   5    0.56    0.22
 -11   1   5    1.00    0.26
  11   1  -5    0.93    0.26
 -10  -1   5    2.55    0.31
  10  -1  -5    2.77    0.35
  10   1  -5    2.34    0.33
 -10   1   5    2.38    0.32
   9  -1  -5    3.15    0.34
  -9  -1   5    3.08    0.33
   9   1  -5    4.05    0.39
  -9   1   5    3.06    0.34
   8  -1  -5    0.62    0.20
  -8  -1   5    0.45    0.17
  -8   1   5    0.69    0.20
   8   1  -5    0.63    0.21
   7  -1  -5    3.18    0.31
  -7  -1   5    3.50    0.27
  -7   1   5    3.24    0.29
   7   1  -5    2.88    0.28
   6  -1  -5    6.67    0.35
  -6  -1   5    5.93    0.34
  -6  -1   5    6.22    0.23
   6   1  -5    5.88    0.34
  -6   1   5    6.73    0.36
  -5  -1   5    8.27    0.28
  -5  -1   5    8.41    0.37
   5  -1  -5    8.69    0.38
   5   1  -5    8.70    0.40
  -5   1   5    7.87    0.37
  -4  -1   5    3.85    0.19
   4  -1  -5    3.85    0.24
  -4  -1   5    3.39    0.22
  -4   1   5    3.54    0.24
   4   1  -5    3.32    0.24
  -3  -1   5    3.24    0.21
   3  -1  -5    3.05    0.20
  -3   1   5    3.09    0.21
   3   1  -5    2.56    0.21
  -2  -1   5   60.00    1.52
   2  -1  -5   60.79    1.52
   2   1  -5   60.07    1.52
  -2   1   5   62.11    1.54
   1  -1  -5    0.02    0.09
  -1  -1   5   -0.09    0.07
  -1   1   5   -0.10    0.08
  -1   1   5   -0.09    0.08
   1   1  -5   -0.04    0.07
   0  -1   5    0.39    0.09
   0  -1  -5    0.42    0.09
   0  -1   5    0.41    0.08
   0   1  -5    0.49    0.09
   0   1   5    0.42    0.09
  -1  -1  -5   98.14    2.38
   1  -1   5   98.22    2.39
   1  -1   5   98.17    2.33
   1   1   5   97.89    2.39
  -1   1  -5   98.51    2.38
  -2  -1  -5   32.08    0.87
   2  -1   5   32.84    0.88
  -2   1  -5   32.17    0.88
   2   1   5   33.39    0.89
   3  -1   5    0.06    0.11
  -3  -1  -5    0.05    0.10
  -3   1  -5    0.07    0.10
   3   1   5    0.04    0.09
  -4  -1  -5   24.84    0.74
   4  -1   5   25.79    0.75
   4   1   5   25.68    0.76
  -4   1  -5   24.25    0.74
  -5  -1  -5   23.94    0.75
   5  -1   5   24.29    0.76
  -5   1  -5   23.80    0.75
   5   1   5   23.76    0.75
  -6  -1  -5   10.71    0.47
   6  -1   5   11.33    0.47
  -6   1  -5   10.60    0.46
   6   1   5   11.15    0.49
  -7  -1  -5    5.92    0.35
   7  -1   5    6.24    0.40
  -7   1  -5    5.66    0.38
   7   1   5    5.85    0.39
   8  -1   5    1.88    0.27
  -8  -1  -5    1.86    0.25
   8   1   5    1.99    0.29
  -8   1  -5    2.13    0.27
   9  -1   5    0.79    0.24
  -9  -1  -5    1.07    0.24
   9   1   5    0.80    0.24
  -9   1  -5    0.44    0.20
  10  -1   5    0.19    0.21
 -10  -1  -5    0.03    0.18
  10   1   5   -0.45    0.18
 -10   1  -5   -0.04    0.19
 -11  -1  -5    0.25    0.21
  11  -1   5    0.04    0.21
 -11   1  -5    0.15    0.21
  11   1   5    0.19    0.24
 -12  -1  -5   -0.20    0.21
  12  -1   5    0.36    0.24
 -12   1  -5    0.21    0.23
  12   1   5    0.00    0.23
 -13  -1  -5    0.06    0.24
  13  -1   5    0.21    0.25
 -13   1  -5    0.35    0.26
  13   1   5    0.45    0.28
 -14  -1  -5    0.73    0.30
  14  -1   5    0.33    0.31
  14   1   5    0.30    0.29
 -14   1  -5    0.22    0.29
  14  -2  -5    0.11    0.28
 -14  -2   5   -0.01    0.25
  14   2  -5    0.55    0.33
 -14   2   5   -0.14    0.25
  13  -2  -5    0.16    0.24
 -13  -2   5    0.00    0.23
  13   2  -5    0.11    0.26
 -13   2   5    0.07    0.24
 -12  -2   5    0.31    0.23
  12  -2  -5   -0.14    0.20
  12   2  -5    0.23    0.24
 -12   2   5   -0.23    0.19
  11  -2  -5    0.49    0.25
 -11  -2   5    0.23    0.19
  11   2  -5    0.31    0.22
 -11   2   5    0.06    0.20
  10  -2  -5    0.48    0.22
 -10  -2   5    0.38    0.21
  10   2  -5    0.12    0.20
 -10   2   5    0.36    0.20
   9  -2  -5    5.07    0.39
  -9  -2   5    4.03    0.36
   9   2  -5    4.10    0.38
  -9   2   5    3.58    0.35
   8  -2  -5    0.97    0.22
  -8  -2   5    1.06    0.21
  -8   2   5    0.84    0.22
   8   2  -5    0.98    0.22
   7  -2  -5    6.95    0.41
  -7  -2   5    6.48    0.37
   7   2  -5    6.88    0.41
  -7   2   5    6.93    0.38
  -6  -2   5    1.17    0.18
   6  -2  -5    0.94    0.18
  -6  -2   5    1.11    0.12
  -6   2   5    0.93    0.18
   6   2  -5    0.74    0.18
  -5  -2   5   10.83    0.42
   5  -2  -5   11.08    0.45
  -5  -2   5   10.91    0.37
   5   2  -5   11.12    0.43
  -5   2   5   10.58    0.43
   4  -2  -5   14.31    0.48
  -4  -2   5   14.60    0.45
  -4  -2   5   14.11    0.48
  -4   2   5   14.10    0.49
   4   2  -5   13.85    0.49
  -3  -2   5   21.99    0.63
  -3  -2   5   21.19    0.62
   3  -2  -5   21.32    0.63
  -3   2   5   21.55    0.64
   3   2  -5   21.28    0.63
  -2  -2   5    3.95    0.20
   2  -2  -5    4.07    0.20
  -2  -2   5    3.98    0.20
   2   2  -5    4.22    0.22
  -2   2   5    4.27    0.22
  -1  -2   5   54.87    1.36
   1  -2  -5   54.41    1.36
  -1  -2   5   54.88    1.36
  -1   2   5   55.43    1.37
   1   2  -5   53.51    1.36
   1   2  -5   53.88    1.36
   0  -2   5  161.21    3.85
   0  -2  -5  163.04    3.88
   0  -2   5  162.18    3.88
   0   2   5  163.37    3.88
   0   2   5  160.99    3.88
   0   2  -5  165.23    3.88
   0   2  -5  163.97    3.88
   1  -2   5   31.17    0.83
   1  -2   5   31.36    0.82
  -1  -2  -5   31.45    0.83
  -1   2  -5   31.41    0.83
   1   2   5   31.61    0.84
  -1   2  -5   32.04    0.84
   2  -2   5   56.19    1.42
  -2  -2  -5   55.26    1.41
  -2   2  -5   56.18    1.42
   2   2   5   56.14    1.43
   3  -2   5    2.13    0.18
  -3  -2  -5    2.48    0.19
   3   2   5    2.08    0.18
  -3   2  -5    2.45    0.20
  -4  -2  -5    1.28    0.16
   4  -2   5    1.63    0.18
  -4   2  -5    1.68    0.18
   4   2   5    1.68    0.19
   5  -2   5   10.52    0.44
  -5  -2  -5   11.14    0.42
  -5   2  -5   10.38    0.43
   5   2   5   10.24    0.43
  -6  -2  -5    6.58    0.36
   6  -2   5    6.63    0.36
  -6   2  -5    7.19    0.38
   6   2   5    6.20    0.36
   7  -2   5    2.09    0.25
  -7  -2  -5    1.66    0.22
  -7   2  -5    1.57    0.23
   7   2   5    1.46    0.23
  -8  -2  -5    7.31    0.43
   8  -2   5    6.50    0.41
  -8   2  -5    5.95    0.40
   8   2   5    7.17    0.43
  -9  -2  -5    7.65    0.47
   9  -2   5    6.75    0.47
   9   2   5    7.00    0.49
  -9   2  -5    6.82    0.45
 -10  -2  -5    2.91    0.33
  10  -2   5    3.11    0.36
  10   2   5    2.31    0.33
 -10   2  -5    2.49    0.34
 -11  -2  -5    0.64    0.23
  11  -2   5    0.48    0.27
  11   2   5    1.01    0.28
 -11   2  -5    0.95    0.28
  12  -2   5    0.15    0.24
 -12  -2  -5    0.00    0.19
  12   2   5   -0.04    0.25
 -12   2  -5    0.49    0.23
 -13  -2  -5    0.85    0.30
  13  -2   5    0.31    0.28
  13   2   5    0.55    0.30
 -13   2  -5    0.36    0.26
  14  -3  -5    0.75    0.30
 -14   3   5    0.64    0.29
  14   3  -5    0.74    0.32
  13  -3  -5    0.39    0.25
  13   3  -5   -0.33    0.21
 -13   3   5   -0.08    0.24
  12  -3  -5    0.49    0.27
 -12  -3   5    0.51    0.23
  12   3  -5    0.74    0.29
 -12   3   5    0.55    0.27
 -11  -3   5    0.19    0.19
  11  -3  -5   -0.24    0.19
 -11   3   5    0.09    0.21
  11   3  -5   -0.05    0.20
 -10  -3   5    0.28    0.19
  10  -3  -5   -0.10    0.17
 -10   3   5    0.25    0.20
  10   3  -5    0.08    0.20
  -9  -3   5   -0.09    0.15
   9  -3  -5   -0.13    0.18
  -9   3   5   -0.21    0.16
   9   3  -5    0.35    0.21
  -8  -3   5   24.20    0.82
   8  -3  -5   24.97    0.85
  -8   3   5   23.02    0.83
   8   3  -5   21.72    0.82
   7  -3  -5    0.29    0.16
  -7  -3   5    0.12    0.14
   7   3  -5   -0.21    0.13
  -7   3   5    0.11    0.15
  -6  -3   5   20.89    0.62
  -6  -3   5   20.89    0.68
   6  -3  -5   20.27    0.69
   6   3  -5   21.23    0.71
  -6   3   5   20.43    0.71
  -6   3   5   20.39    0.56
  -5  -3   5    0.93    0.13
  -5  -3   5    0.77    0.15
   5  -3  -5    0.77    0.16
   5   3  -5    0.94    0.17
  -5   3   5    1.12    0.17
  -5   3   5    1.06    0.11
   4  -3  -5    0.76    0.14
  -4  -3   5    1.20    0.15
  -4  -3   5    1.25    0.15
   4   3  -5    1.36    0.17
  -4   3   5    1.11    0.16
  -3  -3   5   20.94    0.63
  -3  -3   5   20.77    0.60
  -3  -3   5   21.02    0.60
   3  -3  -5   20.66    0.61
  -3   3   5   20.10    0.62
   3   3  -5   20.80    0.62
  -2  -3   5    5.60    0.26
  -2  -3   5    5.13    0.25
  -2  -3   5    5.25    0.22
   2  -3  -5    4.73    0.23
   2   3  -5    5.36    0.23
  -2   3   5    5.13    0.24
   2   3  -5    5.07    0.25
  -1  -3   5   10.25    0.39
   1  -3  -5   10.47    0.35
  -1  -3   5   10.44    0.37
  -1  -3   5   10.21    0.33
   1   3  -5   10.58    0.35
  -1   3   5   10.71    0.35
  -1   3   5   10.77    0.35
   1   3  -5   10.83    0.34
   0  -3  -5   26.33    0.70
   0  -3   5   26.65    0.69
   0  -3   5   26.28    0.72
   0   3  -5   25.96    0.70
   0   3   5   26.64    0.71
   0   3  -5   26.48    0.70
   0   3   5   25.29    0.71
  -1  -3  -5   28.76    0.69
  -1  -3  -5   26.32    0.73
   1  -3   5   28.44    0.74
   1  -3   5   27.88    0.77
  -1   3  -5   27.94    0.74
   1   3   5   27.54    0.75
   1   3   5   27.34    0.75
  -1   3  -5   27.89    0.75
  -2  -3  -5    9.35    0.27
   2  -3   5    8.26    0.32
   2  -3   5    8.69    0.31
  -2  -3  -5    8.26    0.31
   2   3   5    9.04    0.34
  -2   3  -5    8.51    0.32
  -3  -3  -5   14.66    0.46
   3  -3   5   13.59    0.46
  -3   3  -5   13.78    0.47
   3   3   5   14.01    0.48
   4  -3   5    9.21    0.37
  -4  -3  -5    9.28    0.37
   4   3   5    9.09    0.39
  -4   3  -5    8.98    0.37
  -5  -3  -5    5.06    0.28
   5  -3   5    5.16    0.29
   5   3   5    4.74    0.31
  -5   3  -5    4.96    0.29
  -6  -3  -5    0.29    0.13
   6  -3   5    0.08    0.13
  -6   3  -5    0.01    0.14
   6   3   5    0.05    0.14
   7  -3   5   12.05    0.51
  -7  -3  -5   11.42    0.49
   7   3   5   10.86    0.51
  -7   3  -5   12.00    0.52
   8  -3   5    0.31    0.13
  -8  -3  -5    0.15    0.15
   8  -3   5    0.28    0.19
   8   3   5    0.14    0.19
  -8   3  -5    0.29    0.19
   9  -3   5    2.44    0.21
   9  -3   5    2.66    0.33
  -9  -3  -5    2.49    0.30
  -9   3  -5    2.78    0.33
   9   3   5    2.54    0.32
 -10  -3  -5    0.30    0.21
  10  -3   5    0.48    0.22
 -10   3  -5    0.33    0.22
  10   3   5    0.14    0.22
 -11  -3  -5    0.47    0.23
  11  -3   5    0.16    0.23
  11   3   5    0.44    0.25
 -11   3  -5    0.49    0.24
  12  -3   5   -0.07    0.23
 -12  -3  -5    0.05    0.21
 -12   3  -5    0.06    0.22
  12   3   5    0.13    0.25
  13  -3   5   -0.29    0.23
 -13   3  -5    0.17    0.24
  13   3   5    0.36    0.28
  13  -4  -5    0.08    0.24
  13   4  -5   -0.12    0.25
 -13   4   5    0.28    0.27
  12  -4  -5    1.81    0.33
  12   4  -5    0.97    0.31
 -12   4   5    1.22    0.30
  11  -4  -5    0.12    0.20
 -11  -4   5    0.21    0.19
  11   4  -5    0.43    0.25
 -11   4   5    0.16    0.22
  10  -4  -5   -0.15    0.16
 -10  -4   5   -0.06    0.16
  10   4  -5   -0.27    0.20
 -10   4   5    0.13    0.20
  -9  -4   5    0.24    0.17
   9  -4  -5    0.14    0.18
   9   4  -5   -0.41    0.15
  -9   4   5    0.38    0.20
  -8  -4   5    0.24    0.17
   8  -4  -5    0.27    0.19
   8   4  -5    0.22    0.20
  -8   4   5    0.49    0.20
  -7  -4   5    2.12    0.24
  -7  -4   5    2.28    0.21
   7  -4  -5    2.36    0.25
  -7   4   5    1.67    0.23
  -7   4   5    2.10    0.15
   7   4  -5    2.22    0.25
  -6  -4   5    2.46    0.23
   6  -4  -5    2.64    0.24
  -6  -4   5    1.95    0.20
   6   4  -5    2.24    0.24
  -6   4   5    2.15    0.24
  -6   4   5    2.39    0.17
  -5  -4   5   11.66    0.43
  -5  -4   5   11.55    0.43
   5  -4  -5   10.72    0.44
  -5   4   5   10.48    0.45
   5   4  -5   11.51    0.44
  -5   4   5   10.98    0.38
  -4  -4   5    3.29    0.24
  -4  -4   5    3.69    0.22
   4  -4  -5    3.97    0.25
  -4   4   5    3.36    0.23
  -4   4   5    3.59    0.22
   4   4  -5    3.45    0.24
  -3  -4   5   15.10    0.46
   3  -4  -5   14.96    0.47
  -3  -4   5   14.54    0.52
  -3  -4   5   15.61    0.52
   3   4  -5   15.56    0.49
  -3   4   5   14.87    0.49
  -2  -4   5   19.47    0.61
  -2  -4   5   18.77    0.52
  -2  -4   5   18.22    0.58
   2  -4  -5   18.18    0.54
   2   4  -5   18.45    0.54
   2   4  -5   18.74    0.54
  -2   4   5   18.50    0.56
  -2   4   5   18.83    0.55
  -1  -4   5   20.11    0.66
  -1  -4   5   21.70    0.64
   1  -4  -5   20.59    0.58
  -1   4   5   21.06    0.59
   1   4  -5   21.52    0.59
  -1   4   5   21.75    0.60
   1   4  -5   21.39    0.59
   0  -4  -5   13.73    0.41
   0  -4   5   14.20    0.50
   0  -4   5   14.71    0.47
   0   4  -5   14.57    0.42
   0   4   5   14.37    0.43
   0   4  -5   13.71    0.42
   0   4   5   14.06    0.43
   1  -4   5    2.67    0.19
   1  -4   5    2.90    0.23
  -1  -4  -5    2.59    0.15
   1  -4   5    1.73    0.13
  -1  -4  -5    2.24    0.15
   1   4   5    2.57    0.18
  -1   4  -5    2.28    0.17
   1   4   5    2.67    0.18
  -1   4  -5    2.47    0.17
  -2  -4  -5    7.46    0.28
   2  -4   5    7.48    0.28
   2  -4   5    8.01    0.34
  -2  -4  -5    8.18    0.27
   2  -4   5    8.13    0.35
   2   4   5    8.04    0.32
  -2   4  -5    7.03    0.30
   2   4   5    7.88    0.30
  -2   4  -5    7.35    0.30
  -3  -4  -5   16.04    0.49
  -3  -4  -5   16.47    0.47
   3  -4   5   15.70    0.55
   3  -4   5   15.58    0.50
  -3   4  -5   16.34    0.52
   3   4   5   16.22    0.53
  -4  -4  -5    2.00    0.18
   4  -4   5    2.12    0.19
   4  -4   5    1.91    0.20
  -4   4  -5    1.92    0.19
   4   4   5    2.10    0.20
   5  -4   5    1.38    0.18
  -5  -4  -5    1.35    0.17
   5  -4   5    1.38    0.17
   5   4   5    1.44    0.19
  -5   4  -5    1.23    0.18
   6  -4   5    2.53    0.25
  -6  -4  -5    2.49    0.24
   6  -4   5    2.61    0.23
   6   4   5    2.74    0.26
  -6   4  -5    2.82    0.27
  -7  -4  -5    8.93    0.44
   7  -4   5    8.85    0.40
   7  -4   5    8.73    0.45
   7   4   5    9.03    0.48
  -7   4  -5    9.93    0.48
   8  -4   5    0.36    0.19
   8  -4   5    0.27    0.14
  -8  -4  -5    0.59    0.19
   8   4   5    0.06    0.19
  -8   4  -5    0.08    0.17
   9  -4   5    2.24    0.22
  -9  -4  -5    2.99    0.32
   9  -4   5    1.91    0.28
   9   4   5    2.21    0.32
  -9   4  -5    1.92    0.29
 -10  -4  -5    0.78    0.22
  10  -4   5    0.47    0.21
  10   4   5    0.77    0.25
 -10   4  -5    1.11    0.28
 -11  -4  -5    1.29    0.27
  11  -4   5    0.83    0.25
  11   4   5    0.88    0.29
 -11   4  -5    1.16    0.30
  12  -4   5    0.42    0.26
 -12   4  -5    0.06    0.24
  12   4   5    0.23    0.27
  13   4   5   -0.02    0.24
 -13   4  -5   -0.33    0.23
  13   5  -5    0.20    0.29
 -13   5   5    0.37    0.27
 -12   5   5    0.57    0.28
  12   5  -5    0.06    0.25
  11  -5  -5    0.52    0.22
 -11   5   5    0.05    0.20
  11   5  -5    0.10    0.22
  10  -5  -5    0.68    0.22
 -10  -5   5    0.81    0.21
  10   5  -5    0.55    0.23
 -10   5   5    0.29    0.22
   9  -5  -5    0.60    0.21
  -9  -5   5    0.48    0.19
  -9   5   5    0.46    0.20
   9   5  -5    0.32    0.21
  -8  -5   5   15.00    0.58
   8  -5  -5   14.47    0.62
   8   5  -5   13.88    0.62
  -8   5   5   14.03    0.62
  -7  -5   5    3.83    0.29
  -7  -5   5    4.66    0.29
   7  -5  -5    4.19    0.33
  -7   5   5    3.98    0.23
   7   5  -5    4.16    0.32
  -7   5   5    4.09    0.33
   6  -5  -5    5.84    0.35
  -6  -5   5    5.78    0.33
  -6  -5   5    5.35    0.30
   6   5  -5    5.58    0.33
  -6   5   5    5.36    0.26
  -6   5   5    5.16    0.34
   5  -5  -5    0.06    0.11
  -5  -5   5   -0.14    0.09
  -5  -5   5   -0.06    0.12
   5   5  -5   -0.01    0.12
  -5   5   5   -0.06    0.12
  -5   5   5   -0.04    0.09
  -4  -5   5    2.34    0.22
  -4  -5   5    2.95    0.19
  -4  -5   5    3.14    0.25
  -4  -5   5    2.43    0.18
   4  -5  -5    2.44    0.20
  -4   5   5    3.00    0.22
   4   5  -5    2.63    0.21
  -4   5   5    2.69    0.22
  -3  -5   5    7.53    0.36
  -3  -5   5    7.70    0.36
   3  -5  -5    7.70    0.31
   3   5  -5    7.93    0.31
  -3   5   5    8.06    0.34
   3   5  -5    7.42    0.31
  -3   5   5    7.79    0.33
  -2  -5   5   -0.04    0.11
  -2  -5   5    0.03    0.11
   2  -5  -5    0.05    0.07
  -2  -5   5   -0.04    0.06
  -2   5   5    0.05    0.08
   2   5  -5    0.03    0.08
  -2   5   5   -0.07    0.09
   2   5  -5   -0.11    0.08
  -1  -5   5    0.02    0.11
  -1  -5   5    0.00    0.05
  -1  -5   5    0.20    0.11
  -1   5   5    0.18    0.08
   1   5  -5    0.12    0.07
  -1   5   5    0.23    0.09
   1   5  -5    0.14    0.08
   0  -5   5    0.41    0.13
   0  -5   5    0.45    0.06
   0  -5   5    0.23    0.13
   0  -5  -5    0.17    0.06
   0   5   5    0.50    0.10
   0   5   5    0.43    0.10
   0   5  -5    0.57    0.09
   0   5  -5    0.50    0.09
   1  -5   5    3.58    0.28
  -1  -5  -5    3.66    0.20
   1  -5   5    3.46    0.15
   1  -5   5    3.54    0.24
  -1   5  -5    3.86    0.20
  -1   5  -5    3.93    0.20
   1   5   5    3.88    0.20
   1   5   5    3.54    0.21
   2  -5   5  104.09    2.63
   2  -5   5  100.96    2.55
  -2  -5  -5  101.32    2.47
   2   5   5  102.31    2.51
  -2   5  -5  103.79    2.50
  -2   5  -5  100.93    2.50
   2   5   5  102.88    2.50
   3  -5   5    1.40    0.14
  -3  -5  -5    1.47    0.15
   3  -5   5    1.41    0.18
  -3  -5  -5    1.33    0.14
   3   5   5    1.30    0.16
  -3   5  -5    1.22    0.15
  -4  -5  -5    2.95    0.20
   4  -5   5    2.61    0.20
  -4  -5  -5    2.64    0.21
   4  -5   5    2.84    0.25
   4   5   5    2.80    0.23
  -4   5  -5    2.65    0.22
   5  -5   5    0.43    0.14
   5  -5   5    0.34    0.13
  -5  -5  -5    0.18    0.11
  -5   5  -5    0.35    0.15
   5   5   5    0.47    0.15
  -6  -5  -5   -0.02    0.11
   6  -5   5    0.07    0.14
   6  -5   5    0.11    0.14
   6   5   5   -0.23    0.13
  -6   5  -5    0.16    0.15
   7  -5   5    4.71    0.33
   7  -5   5    4.94    0.32
  -7  -5  -5    4.39    0.31
  -7   5  -5    4.48    0.36
   7   5   5    3.85    0.35
   8  -5   5    1.26    0.19
  -8  -5  -5    1.39    0.22
   8  -5   5    1.36    0.23
   8   5   5    1.00    0.24
  -8   5  -5    1.59    0.26
   9  -5   5    3.56    0.35
   9  -5   5    3.38    0.28
  -9  -5  -5    3.56    0.34
  -9   5  -5    3.58    0.37
   9   5   5    3.23    0.36
 -10  -5  -5    0.28    0.19
  10  -5   5    0.41    0.21
  10   5   5    0.43    0.21
 -10   5  -5    0.31    0.23
  11   5   5    0.46    0.27
 -11   5  -5    0.71    0.26
  12   5   5    0.18    0.27
 -12   5  -5    0.37    0.26
  13   5   5    0.73    0.30
 -13   5  -5   -0.25    0.22
 -13   6   5    0.04    0.26
  13   6  -5    0.44    0.29
 -12   6   5    1.11    0.32
  12   6  -5    1.24    0.34
  11   6  -5    4.49    0.45
 -11   6   5    3.49    0.43
  10   6  -5    0.72    0.25
 -10   6   5    1.26    0.28
   9  -6  -5    3.90    0.35
  -9   6   5    3.16    0.35
   9   6  -5    3.69    0.37
   8  -6  -5    5.69    0.39
  -8  -6   5    5.48    0.34
   8   6  -5    4.99    0.39
  -8   6   5    5.98    0.40
   7  -6  -5    5.05    0.37
  -7  -6   5    5.50    0.31
  -7   6   5    5.64    0.30
   7   6  -5    5.54    0.38
  -7   6   5    5.33    0.37
  -6  -6   5    0.45    0.16
  -6  -6   5    0.52    0.14
   6  -6  -5    0.53    0.15
  -6   6   5    0.39    0.15
   6   6  -5    0.48    0.17
  -5  -6   5    2.92    0.29
   5  -6  -5    3.37    0.25
  -5  -6   5    3.52    0.29
  -5  -6   5    3.49    0.22
  -5  -6   5    4.05    0.22
  -5   6   5    3.75    0.27
   5   6  -5    3.62    0.27
  -4  -6   5    2.18    0.23
   4  -6  -5    2.28    0.18
  -4  -6   5    1.91    0.23
   4   6  -5    1.86    0.19
  -4   6   5    2.01    0.20
  -3  -6   5    2.40    0.24
  -3  -6   5    2.59    0.14
   3  -6  -5    1.98    0.15
  -3  -6   5    2.69    0.25
   3   6  -5    2.74    0.18
  -3   6   5    2.68    0.20
  -3   6   5    2.64    0.19
   3   6  -5    2.43    0.19
  -2  -6   5    1.48    0.20
  -2  -6   5    1.73    0.21
   2  -6  -5    1.65    0.12
   2   6  -5    1.67    0.14
  -2   6   5    1.62    0.15
   2   6  -5    1.58    0.14
  -2   6   5    1.27    0.15
   1  -6  -5   16.97    0.44
  -1  -6   5   17.07    0.62
  -1  -6   5   16.98    0.59
   1   6  -5   16.50    0.49
  -1   6   5   17.52    0.51
   1   6  -5   16.76    0.49
  -1   6   5   17.19    0.51
   0  -6  -5   12.32    0.43
   0  -6   5   12.72    0.49
   0  -6   5   12.28    0.51
   0   6  -5   12.88    0.39
   0   6   5   12.46    0.40
   0   6   5   12.55    0.40
   0   6  -5   12.52    0.39
   1  -6   5   13.41    0.53
   1  -6   5   13.35    0.51
  -1  -6  -5   13.98    0.45
  -1   6  -5   13.01    0.42
  -1   6  -5   13.80    0.42
   1   6   5   13.29    0.42
   1   6   5   13.47    0.43
  -2  -6  -5    1.19    0.14
   2  -6   5    1.06    0.09
   2  -6   5    0.78    0.17
   2  -6   5    0.94    0.18
  -2  -6  -5    1.10    0.10
  -2   6  -5    1.12    0.13
  -2   6  -5    1.03    0.13
   2   6   5    1.16    0.13
   2   6   5    1.14    0.14
  -3  -6  -5   17.34    0.53
   3  -6   5   17.40    0.63
  -3   6  -5   17.86    0.56
   3   6   5   16.79    0.54
   3   6   5   17.12    0.56
  -3   6  -5   16.77    0.55
  -4  -6  -5    0.27    0.12
   4  -6   5    0.27    0.15
   4  -6   5    0.34    0.12
  -4  -6  -5    0.18    0.09
  -4   6  -5    0.03    0.12
   4   6   5    0.32    0.14
  -5  -6  -5    3.02    0.22
   5  -6   5    3.17    0.28
   5  -6   5    3.58    0.25
  -5  -6  -5    3.10    0.22
   5   6   5    3.02    0.27
  -5   6  -5    3.52    0.28
   6  -6   5    7.62    0.39
   6  -6   5    7.45    0.37
  -6  -6  -5    7.03    0.35
  -6  -6  -5    6.30    0.34
   6   6   5    7.10    0.40
  -6   6  -5    7.85    0.41
   7  -6   5    2.58    0.26
   7  -6   5    2.36    0.25
  -7  -6  -5    2.37    0.24
  -7   6  -5    1.98    0.26
   7   6   5    2.60    0.29
   8  -6   5    0.62    0.18
  -8  -6  -5    1.06    0.20
   8  -6   5    0.96    0.21
  -8   6  -5    0.43    0.20
   8   6   5    0.57    0.21
   9  -6   5    0.35    0.15
   9  -6   5    0.60    0.19
  -9   6  -5    0.24    0.21
   9   6   5    0.62    0.23
 -10   6  -5   -0.17    0.20
  10   6   5    0.15    0.21
 -11   6  -5   -0.14    0.22
  11   6   5    0.04    0.23
  12   6   5    0.30    0.27
 -12   6  -5   -0.15    0.21
 -13   6  -5    0.09    0.26
  13   6   5    0.34    0.28
 -12   7   5    0.04    0.25
  12   7  -5   -0.17    0.24
  11   7  -5    0.42    0.27
 -11   7   5    0.53    0.26
 -10   7   5    0.22    0.21
  10   7  -5    0.15    0.22
  -9   7   5    1.39    0.27
   9   7  -5    1.26    0.27
  -8   7   5    1.48    0.26
   8   7  -5    1.52    0.26
  -7  -7   5   15.67    0.67
   7  -7  -5   15.12    0.58
   7   7  -5   14.45    0.61
  -7   7   5   15.10    0.62
   6  -7  -5    2.44    0.22
  -6  -7   5    2.57    0.31
  -6  -7   5    2.61    0.28
  -6   7   5    2.18    0.26
   6   7  -5    2.05    0.25
  -5  -7   5    2.20    0.27
   5  -7  -5    2.43    0.20
  -5  -7   5    2.33    0.17
  -5  -7   5    2.26    0.26
  -5   7   5    2.21    0.24
   5   7  -5    2.39    0.24
  -4  -7   5   13.10    0.55
  -4  -7   5   13.09    0.55
  -4   7   5   12.78    0.48
   4   7  -5   13.20    0.46
   4   7  -5   13.19    0.47
   3  -7  -5   13.46    0.40
  -3  -7   5   12.12    0.54
  -3  -7   5   13.78    0.55
   3   7  -5   13.68    0.45
  -3   7   5   13.82    0.47
   3   7  -5   13.65    0.46
  -3   7   5   13.82    0.47
  -2  -7   5   29.53    0.97
  -2  -7   5   31.24    0.94
  -2   7   5   30.17    0.84
   2   7  -5   30.20    0.82
  -2   7   5   30.93    0.85
   2   7  -5   30.76    0.82
  -1  -7   5    7.85    0.39
  -1  -7   5    7.36    0.40
  -1   7   5    7.46    0.29
  -1   7   5    7.03    0.29
   1   7  -5    7.06    0.26
   1   7  -5    7.09    0.27
   0  -7   5    0.66    0.17
   0  -7  -5    0.52    0.14
   0  -7   5    0.67    0.17
   0   7   5    0.65    0.11
   0   7  -5    0.60    0.09
   0   7  -5    0.68    0.10
   0   7   5    0.62    0.10
  -1  -7  -5    1.74    0.18
   1  -7   5    1.56    0.21
   1  -7   5    1.24    0.21
   1   7   5    1.49    0.15
   1   7   5    1.64    0.14
  -1   7  -5    1.87    0.14
  -1   7  -5    1.59    0.14
   2  -7   5    0.03    0.14
  -2  -7  -5    0.04    0.12
   2  -7   5    0.01    0.14
   2   7   5    0.16    0.10
  -2   7  -5    0.00    0.08
  -2   7  -5    0.17    0.10
   2   7   5    0.04    0.08
   3  -7   5    3.07    0.30
  -3  -7  -5    3.19    0.22
   3   7   5    3.22    0.23
  -3   7  -5    3.30    0.23
   3   7   5    2.95    0.23
  -3   7  -5    3.17    0.23
  -4  -7  -5    0.03    0.08
   4  -7   5    0.05    0.05
  -4  -7  -5    0.13    0.13
   4  -7   5    0.06    0.15
  -4   7  -5   -0.01    0.11
   4   7   5    0.07    0.12
   5  -7   5    0.65    0.19
  -5  -7  -5    0.55    0.16
   5  -7   5    0.71    0.14
  -5  -7  -5    0.45    0.10
  -5   7  -5    0.50    0.16
   5   7   5    0.58    0.16
  -6  -7  -5   -0.10    0.10
   6  -7   5   -0.30    0.12
   6  -7   5    0.10    0.16
  -6  -7  -5    0.08    0.13
   6   7   5    0.19    0.17
  -6   7  -5    0.11    0.16
  -7  -7  -5    0.28    0.16
   7  -7   5    0.15    0.17
  -7   7  -5    0.56    0.20
   7   7   5    0.21    0.18
  -8  -7  -5   -0.01    0.15
   8  -7   5    0.19    0.15
   8   7   5   -0.11    0.18
  -8   7  -5   -0.01    0.17
   9  -7   5   -0.03    0.15
   9   7   5    0.30    0.21
  -9   7  -5   -0.03    0.19
 -10   7  -5    0.21    0.22
  10   7   5    0.13    0.20
 -11   7  -5    0.44    0.26
  11   7   5   -0.03    0.23
  12   7   5    0.07    0.26
 -12   7  -5   -0.12    0.21
 -12   8   5    0.71    0.31
  12   8  -5    0.17    0.27
  11   8  -5    0.07    0.24
 -11   8   5    0.28    0.25
 -10  -8   5    1.51    0.30
  10   8  -5    1.45    0.30
 -10   8   5    0.93    0.27
  -9  -8   5    0.42    0.22
  -9   8   5    0.28    0.21
   9   8  -5    0.04    0.20
  -8  -8   5    3.95    0.40
   8   8  -5    3.15    0.34
  -8   8   5    2.55    0.31
  -7  -8   5    0.27    0.21
   7   8  -5    0.25    0.18
  -7   8   5   -0.05    0.17
  -6  -8   5    6.64    0.41
  -6  -8   5    6.66    0.45
   6   8  -5    7.05    0.40
  -6   8   5    7.49    0.41
  -5  -8   5    0.26    0.19
  -5  -8   5    0.00    0.17
   5   8  -5    0.32    0.15
  -5   8   5    0.46    0.16
  -4  -8   5    3.18    0.32
  -4  -8   5    3.20    0.31
  -4   8   5    2.79    0.24
   4   8  -5    3.11    0.25
  -3  -8   5    1.00    0.22
  -3  -8   5    0.54    0.20
   3   8  -5    0.68    0.13
   3   8  -5    0.56    0.13
  -3   8   5    0.73    0.14
  -3   8   5    0.74    0.14
  -2  -8   5    2.46    0.28
  -2  -8   5    2.64    0.29
   2   8  -5    2.29    0.19
   2   8  -5    2.74    0.18
  -2   8   5    2.44    0.19
  -2   8   5    2.60    0.21
  -1  -8   5   -0.10    0.14
  -1  -8   5   -0.03    0.15
   1   8  -5    0.05    0.08
  -1   8   5    0.01    0.09
  -1   8   5   -0.17    0.07
   1   8  -5   -0.04    0.07
   0  -8  -5    0.83    0.17
   0  -8   5    1.32    0.22
   0  -8   5    0.97    0.20
   0   8  -5    0.90    0.10
   0   8  -5    0.93    0.11
   0   8   5    0.98    0.12
   0   8   5    0.89    0.12
   1  -8   5   13.90    0.57
  -1  -8  -5   13.21    0.49
   1  -8   5   12.94    0.57
   1   8   5   13.13    0.43
  -1   8  -5   13.06    0.41
  -1   8  -5   12.83    0.41
   1   8   5   13.07    0.42
   2  -8   5    2.18    0.27
  -2  -8  -5    2.95    0.23
   2  -8   5    2.61    0.29
  -2   8  -5    2.68    0.20
   2   8   5    2.76    0.21
  -2   8  -5    3.26    0.22
   2   8   5    2.77    0.21
   3  -8   5    1.54    0.24
  -3  -8  -5    1.22    0.18
   3   8   5    1.15    0.16
  -3   8  -5    1.22    0.16
  -3   8  -5    1.70    0.17
   3   8   5    1.32    0.16
   4  -8   5   12.41    0.56
  -4  -8  -5   12.28    0.48
  -4   8  -5   12.97    0.48
   4   8   5   12.64    0.49
  -5  -8  -5    1.64    0.21
   5  -8   5    1.33    0.24
  -5   8  -5    1.48    0.21
   5   8   5    1.63    0.22
  -6  -8  -5    1.26    0.20
   6  -8   5    1.17    0.22
   6   8   5    1.18    0.21
  -6   8  -5    1.63    0.23
  -7  -8  -5    1.29    0.21
   7  -8   5    0.72    0.20
  -7   8  -5    0.82    0.21
   7   8   5    1.36    0.23
   8  -8   5   -0.14    0.16
  -8  -8  -5   -0.03    0.16
   8   8   5   -0.02    0.18
  -8   8  -5   -0.18    0.16
  -9  -8  -5    0.39    0.19
   9  -8   5    0.35    0.19
   9   8   5    0.28    0.21
  -9   8  -5    0.50    0.23
 -10  -8  -5    0.49    0.21
  10   8   5    0.08    0.21
 -10   8  -5    0.83    0.25
 -11  -8  -5   -0.14    0.17
 -11   8  -5    0.32    0.24
  11   8   5    0.18    0.23
 -12  -8  -5    0.08    0.22
 -12   8  -5    0.66    0.29
  12   8   5    0.25    0.28
 -11  -9   5    0.28    0.25
 -11   9   5   -0.32    0.23
  11   9  -5    0.08    0.25
 -10  -9   5    0.18    0.23
  10   9  -5    0.21    0.23
 -10   9   5    0.05    0.22
  -9  -9   5   -0.02    0.20
   9   9  -5    0.15    0.20
  -9   9   5   -0.20    0.19
  -8  -9   5   -0.12    0.19
   8   9  -5   -0.36    0.17
  -8   9   5   -0.09    0.18
  -7  -9   5    0.91    0.25
  -7   9   5    0.91    0.22
   7   9  -5    0.72    0.22
  -6  -9   5    0.03    0.18
  -6  -9   5    0.13    0.19
   6   9  -5    0.12    0.16
  -6   9   5    0.23    0.17
  -5  -9   5    3.66    0.36
  -5  -9   5    3.59    0.35
   5   9  -5    3.58    0.28
  -5   9   5    3.28    0.29
  -4  -9   5    6.95    0.44
  -4  -9   5    6.77    0.43
   4   9  -5    8.00    0.36
  -4   9   5    7.57    0.36
  -3  -9   5    7.25    0.44
  -3  -9   5    7.63    0.46
  -3   9   5    7.68    0.34
   3   9  -5    7.46    0.32
  -2  -9   5    6.31    0.42
  -2  -9   5    6.85    0.43
   2   9  -5    6.47    0.28
   2   9  -5    6.49    0.27
  -2   9   5    6.29    0.29
  -2   9   5    6.87    0.31
  -1  -9   5    2.13    0.28
  -1  -9   5    2.24    0.29
   1   9  -5    2.18    0.16
   1   9  -5    1.72    0.14
  -1   9   5    2.19    0.18
  -1   9   5    2.02    0.16
   0  -9   5    0.86    0.22
   0  -9  -5    0.47    0.17
   0  -9   5    0.77    0.21
   0   9   5    0.63    0.12
   0   9  -5    0.52    0.09
   0   9  -5    0.46    0.10
   0   9   5    0.62    0.11
  -1  -9  -5    5.46    0.33
   1  -9   5    4.98    0.38
   1  -9   5    4.93    0.38
   1   9   5    5.19    0.26
  -1   9  -5    5.17    0.24
   1   9   5    5.46    0.26
  -1   9  -5    5.78    0.25
   2  -9   5    0.35    0.19
   2  -9   5   -0.05    0.17
  -2  -9  -5    0.19    0.15
  -2   9  -5    0.08    0.10
   2   9   5    0.14    0.10
   2   9   5    0.10    0.11
  -2   9  -5    0.15    0.10
  -3  -9  -5    6.74    0.35
   3  -9   5    6.30    0.42
   3   9   5    6.36    0.32
  -3   9  -5    6.05    0.31
   4  -9   5    1.28    0.25
  -4  -9  -5    1.97    0.23
   4   9   5    1.76    0.20
  -4   9  -5    1.65    0.20
   5  -9   5    0.75    0.21
  -5  -9  -5    0.71    0.18
   5   9   5    0.61    0.17
  -5   9  -5    0.60    0.18
  -6  -9  -5    1.10    0.20
   6  -9   5    0.65    0.21
   6   9   5    0.80    0.20
  -6   9  -5    0.57    0.19
   7  -9   5    0.59    0.21
  -7  -9  -5    0.39    0.18
  -7   9  -5    0.36    0.19
   7   9   5    0.85    0.21
   8  -9   5   -0.09    0.17
  -8  -9  -5    0.53    0.20
  -8   9  -5    0.05    0.20
   8   9   5    0.19    0.19
  -9  -9  -5    0.70    0.22
   9   9   5    0.70    0.25
  -9   9  -5    0.63    0.25
 -10  -9  -5    0.13    0.19
  10   9   5    0.18    0.22
 -10   9  -5   -0.11    0.21
 -11  -9  -5    0.43    0.23
  11   9   5    0.24    0.26
 -11   9  -5    0.34    0.25
 -11 -10   5    0.54    0.29
  11  10  -5    0.45    0.27
 -11  10   5    0.59    0.28
 -10 -10   5    0.16    0.25
  10  10  -5    0.17    0.23
 -10  10   5    0.04    0.22
  -9 -10   5    0.45    0.26
   9  10  -5    0.63    0.25
  -9  10   5    0.32    0.23
  -8 -10   5    0.98    0.28
  -8  10   5    1.78    0.28
   8  10  -5    1.18    0.26
  -7 -10   5    0.44    0.24
  -7  10   5    0.52    0.20
   7  10  -5    0.28    0.19
  -6 -10   5    0.86    0.25
   6  10  -5    0.41    0.18
  -6  10   5    0.36    0.18
  -5 -10   5    1.34    0.25
  -5 -10   5    1.17    0.26
  -5  10   5    1.04    0.20
   5  10  -5    1.44    0.20
  -4 -10   5   -0.03    0.18
  -4 -10   5   -0.08    0.18
  -4  10   5    0.14    0.13
   4  10  -5    0.18    0.13
  -3 -10   5    0.21    0.20
  -3 -10   5    0.09    0.19
   3  10  -5    0.09    0.11
  -3  10   5    0.15    0.12
  -2 -10   5    0.02    0.18
  -2 -10   5    0.07    0.18
   2  10  -5   -0.09    0.09
  -2  10   5   -0.05    0.11
  -1 -10   5    6.79    0.45
  -1 -10   5    6.70    0.42
  -1  10   5    6.31    0.29
   1  10  -5    6.55    0.25
   1  10  -5    6.50    0.26
  -1  10   5    6.26    0.28
   0 -10   5    2.79    0.34
   0 -10   5    2.34    0.31
   0  10  -5    2.57    0.17
   0  10   5    2.60    0.20
   0  10  -5    2.63    0.18
   1 -10   5    2.29    0.32
   1 -10   5    2.20    0.31
  -1 -10  -5    1.74    0.24
   1  10   5    2.29    0.19
  -1  10  -5    2.15    0.16
   2 -10   5   -0.07    0.18
  -2 -10  -5    0.20    0.16
   2 -10   5   -0.13    0.19
  -2  10  -5    0.07    0.10
   2  10   5   -0.01    0.11
   3 -10   5    0.22    0.21
  -3 -10  -5    0.52    0.18
  -3  10  -5    0.44    0.13
   3  10   5    0.21    0.13
  -4 -10  -5    0.47    0.17
   4 -10   5    0.31    0.21
  -4  10  -5    0.02    0.12
   4  10   5    0.07    0.14
  -5 -10  -5    0.32    0.18
   5 -10   5    0.28    0.21
  -5  10  -5   -0.05    0.14
   5  10   5    0.39    0.16
   6 -10   5    0.02    0.19
  -6 -10  -5    0.05    0.16
  -6  10  -5    0.06    0.16
   6  10   5    0.07    0.16
   7 -10   5   -0.19    0.18
  -7 -10  -5   -0.12    0.15
  -7  10  -5   -0.06    0.15
   7  10   5    0.32    0.19
   8 -10   5   -0.01    0.18
  -8 -10  -5    0.05    0.17
   8  10   5    0.15    0.20
  -8  10  -5    0.26    0.21
  -9 -10  -5    0.75    0.24
  -9  10  -5    1.08    0.28
   9  10   5    0.59    0.25
 -10 -10  -5    1.16    0.25
  10  10   5    0.36    0.25
 -10  10  -5    0.59    0.27
 -11 -10  -5   -0.08    0.18
  11  10   5   -0.14    0.24
 -11  10  -5   -0.24    0.24
 -10 -11   5    0.00    0.23
 -10  11   5   -0.01    0.23
  10  11  -5    0.27    0.24
  -9 -11   5    0.41    0.25
  -9  11   5    0.41    0.25
   9  11  -5    0.22    0.23
  -8 -11   5    0.00    0.21
  -8  11   5   -0.02    0.19
   8  11  -5    0.23    0.20
  -7 -11   5    0.13    0.22
   7  11  -5   -0.10    0.17
  -7  11   5    0.10    0.18
  -6 -11   5    0.25    0.21
   6  11  -5    0.02    0.16
  -6  11   5   -0.18    0.15
  -5 -11   5    1.75    0.32
  -5 -11   5    2.09    0.32
   5  11  -5    1.89    0.22
  -5  11   5    1.87    0.23
  -4 -11   5    0.13    0.19
  -4 -11   5   -0.03    0.19
  -4  11   5    0.03    0.14
   4  11  -5    0.29    0.13
  -3 -11   5    2.67    0.34
  -3 -11   5    3.26    0.38
   3  11  -5    3.10    0.23
  -3  11   5    2.91    0.24
  -2 -11   5    0.13    0.19
  -2 -11   5    0.32    0.21
  -2  11   5    0.27    0.12
   2  11  -5    0.45    0.11
  -1 -11   5    0.41    0.22
  -1 -11   5    0.38    0.23
   1  11  -5    0.43    0.10
  -1  11   5    0.49    0.12
  -1  11   5    0.58    0.13
   0 -11   5    3.81    0.38
   0 -11   5    3.28    0.37
   0  11   5    3.54    0.23
   0  11  -5    3.35    0.19
   1 -11   5    0.64    0.24
  -1 -11  -5    0.74    0.20
   1 -11   5    0.81    0.25
  -1  11  -5    0.66    0.11
   1  11   5    0.83    0.14
   2 -11   5    0.42    0.22
  -2 -11  -5    0.49    0.19
   2 -11   5    0.71    0.23
   2  11   5    0.27    0.12
  -2  11  -5    0.53    0.12
   3 -11   5    0.01    0.19
  -3 -11  -5   -0.25    0.15
   3  11   5    0.13    0.12
  -3  11  -5   -0.09    0.11
  -4 -11  -5    0.64    0.19
   4 -11   5    0.65    0.25
   4  11   5    0.68    0.17
  -4  11  -5    0.62    0.16
  -5 -11  -5    0.04    0.16
   5 -11   5    0.07    0.20
   5  11   5    0.39    0.16
  -5  11  -5    0.14    0.15
   6 -11   5    0.71    0.26
  -6 -11  -5    0.81    0.22
  -6  11  -5    1.10    0.22
   6  11   5    1.17    0.22
  -7 -11  -5    0.16    0.19
   7 -11   5    0.27    0.23
  -7  11  -5    0.07    0.18
   7  11   5    0.28    0.19
  -8 -11  -5    0.15    0.19
   8 -11   5    0.40    0.23
   8  11   5    0.40    0.23
  -8  11  -5    0.04    0.20
  -9 -11  -5   -0.35    0.17
  -9  11  -5   -0.32    0.19
   9  11   5    0.23    0.21
 -10 -11  -5    0.53    0.24
  10  11   5    0.04    0.24
 -10  11  -5    0.30    0.24
  -9 -12   5    0.00    0.25
  -9  12   5   -0.15    0.21
   9  12  -5   -0.10    0.21
  -8 -12   5   -0.43    0.21
  -8  12   5   -0.15    0.19
   8  12  -5   -0.06    0.19
  -7 -12   5    1.04    0.29
  -7  12   5    1.31    0.26
   7  12  -5    1.48    0.25
  -6 -12   5    0.65    0.27
   6  12  -5    0.63    0.19
  -6  12   5    0.53    0.20
  -5 -12   5    1.34    0.29
   5  12  -5    1.11    0.20
  -5  12   5    1.55    0.22
  -4 -12   5    0.79    0.26
  -4 -12   5    0.65    0.27
   4  12  -5    0.26    0.14
  -4  12   5    0.55    0.17
  -3 -12   5    0.26    0.23
  -3 -12   5    0.18    0.21
  -3  12   5    0.08    0.13
   3  12  -5    0.03    0.11
  -2 -12   5    0.56    0.24
  -2 -12   5    0.38    0.24
  -2  12   5    0.45    0.14
   2  12  -5    0.52    0.11
  -1 -12   5    0.22    0.21
  -1 -12   5    0.13    0.22
   1  12  -5   -0.05    0.08
  -1  12   5   -0.03    0.10
   0 -12   5    2.18    0.34
   0 -12   5    1.77    0.32
   0  12   5    2.38    0.19
   0  12  -5    2.55    0.17
   1 -12   5    1.19    0.28
  -1 -12  -5    0.93    0.22
   1 -12   5    0.95    0.26
  -1  12  -5    0.89    0.12
   1  12   5    1.09    0.15
   2 -12   5    0.03    0.21
   2 -12   5   -0.25    0.19
  -2 -12  -5    0.07    0.19
   2  12   5    0.13    0.11
  -2  12  -5    0.02    0.11
   3 -12   5    1.44    0.31
  -3 -12  -5    1.43    0.25
   3  12   5    1.54    0.19
  -3  12  -5    0.98    0.16
  -4 -12  -5    0.77    0.21
   4 -12   5    0.69    0.25
  -4  12  -5    0.36    0.15
   4  12   5    0.36    0.15
  -5 -12  -5    0.22    0.18
   5 -12   5    0.91    0.26
  -5  12  -5    0.33    0.17
   5  12   5    0.58    0.18
  -6 -12  -5    0.29    0.19
   6 -12   5    0.25    0.25
  -6  12  -5    0.64    0.20
   6  12   5    0.00    0.17
  -7 -12  -5    2.25    0.31
   7 -12   5    2.76    0.39
  -7  12  -5    2.41    0.31
   7  12   5    2.77    0.31
   8 -12   5    0.15    0.24
  -8 -12  -5    0.21    0.21
   8  12   5    0.13    0.22
  -8  12  -5    0.17    0.22
  -9 -12  -5   -0.04    0.19
   9  12   5    0.09    0.23
  -9  12  -5    0.27    0.25
  -8 -13   5    1.14    0.31
   8  13  -5    0.65    0.24
  -8  13   5    1.07    0.26
  -7 -13   5   -0.17    0.24
   7  13  -5    0.11    0.19
  -7  13   5    0.02    0.20
  -6 -13   5    2.59    0.37
   6  13  -5    2.82    0.29
  -6  13   5    2.88    0.32
  -5 -13   5    0.06    0.22
  -5  13   5    0.33    0.18
   5  13  -5   -0.01    0.14
  -4 -13   5    0.70    0.26
   4  13  -5    0.95    0.16
  -4  13   5    0.72    0.18
  -3 -13   5    0.17    0.24
  -3 -13   5   -0.13    0.22
   3  13  -5    0.16    0.12
  -3  13   5    0.26    0.14
  -2 -13   5    0.10    0.23
  -2 -13   5    0.47    0.26
   2  13  -5   -0.02    0.10
  -2  13   5   -0.01    0.12
  -2  13   5   -0.01    0.12
  -1 -13   5    1.22    0.29
  -1 -13   5    1.36    0.32
  -1  13   5    1.59    0.17
   1  13  -5    1.28    0.13
   0 -13   5    0.09    0.22
   0 -13   5    0.13    0.22
   0  13   5   -0.07    0.10
   0  13  -5   -0.05    0.08
  -1 -13  -5    0.69    0.24
   1 -13   5    0.83    0.28
   1 -13   5    0.86    0.28
  -1  13  -5    0.51    0.11
   1  13   5    0.85    0.14
  -2 -13  -5    1.92    0.30
   2 -13   5    1.68    0.33
   2 -13   5    1.81    0.35
  -2  13  -5    1.86    0.18
   2  13   5    2.18    0.19
  -3 -13  -5    0.33    0.20
   3 -13   5    0.16    0.24
  -3  13  -5   -0.09    0.12
   3  13   5   -0.09    0.12
   4 -13   5    0.81    0.29
  -4 -13  -5    0.58    0.23
   4  13   5    0.66    0.17
  -4  13  -5    1.08    0.19
  -5 -13  -5    0.07    0.20
   5 -13   5    0.07    0.23
   5  13   5   -0.09    0.14
  -5  13  -5    0.02    0.15
   6 -13   5    0.65    0.29
  -6 -13  -5    0.31    0.22
  -6  13  -5    0.70    0.21
   6  13   5    0.98    0.21
  -7 -13  -5    0.33    0.22
   7 -13   5    0.08    0.25
   7  13   5    0.49    0.22
  -7  13  -5   -0.05    0.19
  -8 -13  -5    1.06    0.27
  -8  13  -5    1.37    0.29
   8  13   5    0.83    0.25
  -7 -14   5    0.37    0.27
   7  14  -5    0.43    0.21
  -7  14   5    0.62    0.24
  -6 -14   5    1.17    0.33
   6  14  -5    1.42    0.23
  -6  14   5    1.21    0.24
  -5 -14   5   -0.22    0.21
  -5  14   5   -0.16    0.16
   5  14  -5   -0.10    0.14
  -4 -14   5    0.07    0.26
  -4  14   5    0.51    0.18
   4  14  -5    0.39    0.14
  -3 -14   5    0.20    0.25
  -3  14   5    0.03    0.14
   3  14  -5   -0.11    0.10
  -2 -14   5    0.58    0.28
  -2 -14   5    0.47    0.26
  -2  14   5    0.13    0.12
  -1 -14   5   -0.05    0.25
  -1 -14   5   -0.09    0.21
  -1  14   5   -0.05    0.11
   0 -14   5    0.09    0.26
   0 -14   5   -0.27    0.24
   0  14   5    0.11    0.12
   1 -14   5    0.34    0.26
   1 -14   5   -0.31    0.20
   1  14   5    0.08    0.11
  -2 -14  -5    0.72    0.24
   2 -14   5    0.20    0.26
   2  14   5    0.77    0.15
  -2  14  -5    0.32    0.12
  -3 -14  -5   -0.12    0.19
   3 -14   5    0.02    0.24
   3  14   5   -0.19    0.12
  -3  14  -5   -0.16    0.12
   4 -14   5    0.56    0.28
  -4 -14  -5    0.03    0.20
   4  14   5    0.05    0.15
  -4  14  -5   -0.20    0.14
   5 -14   5    0.21    0.28
  -5 -14  -5   -0.12    0.20
  -5  14  -5    0.18    0.18
   5  14   5   -0.16    0.15
   6 -14   5    0.48    0.30
  -6 -14  -5    0.54    0.23
   6  14   5    0.82    0.22
  -6  14  -5    0.43    0.20
  -5 -15   5    0.94    0.33
  -5  15   5    1.21    0.24
  -4 -15   5   -0.13    0.26
  -4  15   5    0.05    0.16
  -3 -15   5    0.44    0.27
  -3  15   5    0.59    0.16
  -3  15   5    0.34    0.15
  -2 -15   5    0.49    0.27
  -2  15   5    0.60    0.14
  -1 -15   5    0.72    0.33
   0 -15   5    1.02    0.35
   0 -15   5    1.00    0.33
   1 -15   5    1.52    0.37
   1 -15   5    0.40    0.29
   2 -15   5    1.21    0.34
  -2 -15  -5    0.42    0.25
   3 -15   5    0.20    0.28
  -3 -15  -5   -0.03    0.22
   4 -15   5   -0.46    0.23
  -4 -15  -5   -0.11    0.23
  -4  15  -5   -0.11    0.14
   4  15   5    0.35    0.16
  -5 -15  -5    0.00    0.23
   5 -15   5    0.14    0.28
   5  15   5   -0.01    0.15
  -5  15  -5   -0.15    0.16
  -1 -16   5    0.02    0.26
   0 -16   5   -0.49    0.25
  14   0  -6   -0.02    0.29
 -14   0   6    0.15    0.25
 -13   0   6    0.00    0.22
  13   0  -6    0.23    0.26
 -12   0   6    0.92    0.26
  12   0  -6    1.87    0.35
  11   0  -6   -0.10    0.19
 -11   0   6   -0.22    0.19
 -10   0   6   -0.18    0.17
  10   0  -6   -0.21    0.18
  -9   0   6    0.10    0.19
   9   0  -6    0.45    0.22
   8   0  -6   34.60    1.10
  -8   0   6   34.39    1.10
  -7   0   6   -0.22    0.13
   7   0  -6   -0.01    0.15
   6   0  -6   82.44    2.13
  -6   0   6   80.39    2.13
  -6   0   6   81.00    1.99
   5   0  -6   -0.11    0.12
  -5   0   6   -0.06    0.12
  -4   0   6   75.68    1.96
   4   0  -6   77.66    1.96
  -3   0   6    0.15    0.11
   3   0  -6    0.06    0.10
   2   0  -6   13.69    0.45
  -2   0   6   13.48    0.45
   1   0  -6   -0.07    0.09
  -1   0   6    0.00    0.08
   0   0   6   47.40    1.22
   0   0  -6   47.91    1.22
   0   0   6   47.63    1.15
   1   0   6    0.03    0.09
   1   0   6    0.03    0.05
  -1   0  -6    0.01    0.05
  -1   0  -6    0.02    0.09
   2   0   6   35.02    0.95
  -2   0  -6   34.83    0.94
   3   0   6   -0.03    0.10
  -3   0  -6    0.01    0.09
   4   0   6   92.95    2.33
  -4   0  -6   90.81    2.31
  -5   0  -6   -0.25    0.11
   5   0   6   -0.03    0.12
  -6   0  -6    3.83    0.28
   6   0   6    4.17    0.30
   7   0   6    0.03    0.15
  -7   0  -6    0.00    0.13
   8   0   6    2.66    0.31
  -8   0  -6    2.57    0.30
   9   0   6    0.20    0.20
  -9   0  -6   -0.02    0.18
 -10   0  -6    4.63    0.43
  10   0   6    6.12    0.49
 -11   0  -6    0.08    0.20
  11   0   6   -0.21    0.20
  12   0   6    0.75    0.29
 -12   0  -6    1.00    0.29
 -13   0  -6   -0.02    0.21
  13   0   6   -0.01    0.24
 -14  -1   6    0.17    0.26
  14  -1  -6   -0.08    0.27
 -14   1   6    0.35    0.27
  14   1  -6    0.13    0.27
 -13  -1   6   -0.03    0.22
  13  -1  -6   -0.49    0.20
 -13   1   6   -0.29    0.22
  13   1  -6    0.09    0.27
 -12  -1   6    0.01    0.20
  12  -1  -6    0.13    0.25
  12   1  -6    0.03    0.25
 -12   1   6   -0.07    0.22
 -11  -1   6    0.17    0.18
  11  -1  -6    0.13    0.22
 -11   1   6    0.32    0.20
  11   1  -6   -0.29    0.18
  10  -1  -6    0.18    0.20
 -10  -1   6    0.04    0.18
 -10   1   6    0.13    0.18
  10   1  -6   -0.02    0.19
  -9  -1   6    0.89    0.23
   9  -1  -6    0.44    0.22
  -9   1   6    0.73    0.23
   9   1  -6    1.03    0.25
   8  -1  -6    5.23    0.37
  -8  -1   6    5.44    0.35
  -8   1   6    4.19    0.34
   8   1  -6    4.64    0.37
  -7  -1   6    1.95    0.14
   7  -1  -6    2.17    0.26
  -7  -1   6    1.77    0.23
   7   1  -6    2.23    0.27
  -7   1   6    1.91    0.24
  -6  -1   6   39.90    1.02
   6  -1  -6   39.75    1.14
  -6  -1   6   40.04    1.15
  -6   1   6   39.38    1.15
   6   1  -6   37.99    1.14
  -5  -1   6   41.70    1.08
  -5  -1   6   42.97    1.18
   5  -1  -6   41.08    1.16
   5   1  -6   40.52    1.16
  -5   1   6   42.49    1.18
   4  -1  -6   17.58    0.57
  -4  -1   6   17.66    0.57
   4   1  -6   17.03    0.56
  -4   1   6   17.46    0.58
   3  -1  -6    0.97    0.14
  -3  -1   6    0.88    0.13
  -3   1   6    0.78    0.14
   3   1  -6    0.70    0.14
  -2  -1   6    8.87    0.33
  -2  -1   6    8.31    0.32
   2  -1  -6    8.53    0.33
  -2   1   6    8.43    0.32
   2   1  -6    8.37    0.32
  -1  -1   6    0.61    0.11
   1  -1  -6    0.67    0.11
   1   1  -6    0.51    0.11
  -1   1   6    0.68    0.12
   0  -1  -6   41.06    1.08
   0  -1   6   42.76    1.04
   0  -1   6   40.90    1.07
   0   1  -6   41.80    1.08
   0   1   6   40.53    1.08
  -1  -1  -6    3.59    0.20
   1  -1   6    3.65    0.17
   1  -1   6    3.57    0.21
  -1   1  -6    3.60    0.20
   1   1   6    3.55    0.21
  -2  -1  -6    5.04    0.26
   2  -1   6    5.21    0.27
   2   1   6    5.34    0.27
  -2   1  -6    5.28    0.27
   3  -1   6    6.89    0.31
  -3  -1  -6    6.72    0.31
   3   1   6    6.45    0.30
  -3   1  -6    6.80    0.31
   4  -1   6   17.25    0.58
  -4  -1  -6   17.70    0.58
   4   1   6   17.53    0.60
  -4   1  -6   17.07    0.57
  -5  -1  -6   10.63    0.45
   5  -1   6   10.81    0.46
  -5   1  -6   11.60    0.46
   5   1   6   11.05    0.45
   6  -1   6    2.79    0.27
  -6  -1  -6    3.05    0.27
   6   1   6    2.94    0.27
  -6   1  -6    2.78    0.26
  -7  -1  -6   12.83    0.55
   7  -1   6   13.61    0.58
   7   1   6   13.36    0.59
  -7   1  -6   12.73    0.55
  -8  -1  -6    1.38    0.23
   8  -1   6    1.45    0.26
   8   1   6    1.51    0.26
  -8   1  -6    1.46    0.25
  -9  -1  -6    9.38    0.50
   9  -1   6   10.05    0.55
  -9   1  -6    8.98    0.50
   9   1   6    9.51    0.56
 -10  -1  -6    0.04    0.17
  10  -1   6   -0.14    0.20
  10   1   6    0.03    0.19
 -10   1  -6    0.03    0.20
 -11  -1  -6    0.02    0.19
  11  -1   6    0.25    0.22
  11   1   6    0.25    0.23
 -11   1  -6   -0.32    0.19
 -12  -1  -6    1.02    0.30
  12  -1   6    0.51    0.26
 -12   1  -6    0.13    0.24
  12   1   6    0.88    0.30
 -13  -1  -6    0.05    0.24
  13  -1   6   -0.31    0.21
 -13   1  -6    0.06    0.23
  13   1   6    0.24    0.28
  14  -2  -6    0.49    0.31
 -14   2   6    0.60    0.29
  14   2  -6    0.49    0.31
 -13  -2   6    0.55    0.27
  13  -2  -6    0.28    0.28
  13   2  -6    0.40    0.29
 -13   2   6    0.26    0.26
  12  -2  -6    1.11    0.31
 -12  -2   6    1.03    0.28
 -12   2   6    0.82    0.28
  12   2  -6    0.97    0.32
  11  -2  -6    0.94    0.28
 -11  -2   6    0.52    0.22
  11   2  -6    0.43    0.25
 -11   2   6    0.74    0.24
  10  -2  -6   -0.16    0.19
 -10  -2   6    0.14    0.19
 -10   2   6    0.12    0.20
  10   2  -6    0.24    0.22
   9  -2  -6    4.18    0.39
  -9  -2   6    3.60    0.34
   9   2  -6    2.91    0.34
  -9   2   6    3.20    0.34
  -8  -2   6   13.00    0.57
   8  -2  -6   14.08    0.62
   8   2  -6   12.96    0.59
  -8   2   6   14.41    0.61
  -7  -2   6    3.07    0.19
  -7  -2   6    2.81    0.27
   7  -2  -6    2.86    0.29
  -7   2   6    3.34    0.30
   7   2  -6    3.14    0.30
  -6  -2   6    2.13    0.23
   6  -2  -6    1.47    0.22
  -6  -2   6    2.11    0.16
  -6   2   6    1.91    0.23
   6   2  -6    1.50    0.21
   5  -2  -6    9.69    0.41
  -5  -2   6    9.17    0.34
  -5  -2   6    9.56    0.40
  -5   2   6    8.28    0.40
   5   2  -6    9.35    0.40
  -4  -2   6    4.68    0.24
   4  -2  -6    5.22    0.29
  -4  -2   6    4.74    0.26
   4   2  -6    4.87    0.27
  -4   2   6    4.46    0.28
  -3  -2   6    0.12    0.10
   3  -2  -6    0.29    0.11
  -3  -2   6    0.17    0.09
   3   2  -6    0.04    0.10
  -3   2   6    0.15    0.10
   2  -2  -6   17.43    0.53
  -2  -2   6   17.60    0.53
   2   2  -6   18.35    0.54
  -2   2   6   17.69    0.55
  -1  -2   6    7.56    0.29
   1  -2  -6    7.60    0.30
  -1  -2   6    7.39    0.29
   1   2  -6    7.90    0.29
  -1   2   6    7.72    0.29
  -1   2   6    7.98    0.30
   0  -2  -6  131.44    3.22
   0  -2   6  135.30    3.19
   0  -2   6  133.16    3.22
   0   2   6  134.26    3.23
   0   2  -6  136.02    3.23
   1  -2   6   53.89    1.35
  -1  -2  -6   53.68    1.37
   1  -2   6   55.96    1.38
  -1   2  -6   52.93    1.37
   1   2   6   53.74    1.38
   2  -2   6   29.39    0.80
   2  -2   6   30.39    0.83
  -2  -2  -6   30.62    0.83
   2   2   6   30.38    0.85
  -2   2  -6   30.81    0.84
  -3  -2  -6    2.16    0.18
   3  -2   6    2.14    0.18
   3   2   6    1.72    0.18
  -3   2  -6    2.19    0.19
   4  -2   6    2.00    0.20
  -4  -2  -6    1.90    0.19
  -4   2  -6    2.02    0.20
   4   2   6    1.64    0.18
  -5  -2  -6    3.75    0.27
   5  -2   6    3.22    0.27
   5   2   6    3.08    0.26
  -5   2  -6    3.10    0.26
  -6  -2  -6    7.31    0.39
   6  -2   6    7.69    0.41
  -6   2  -6    7.35    0.40
   6   2   6    8.48    0.43
  -7  -2  -6    1.68    0.23
   7  -2   6    2.43    0.28
   7   2   6    2.06    0.26
  -7   2  -6    2.03    0.26
   8  -2   6    1.52    0.25
  -8  -2  -6    2.17    0.27
   8   2   6    1.23    0.26
  -8   2  -6    1.55    0.26
  -9  -2  -6    0.03    0.17
   9  -2   6    0.02    0.19
  -9   2  -6    0.30    0.19
   9   2   6    0.00    0.20
  10  -2   6   -0.23    0.17
 -10  -2  -6   -0.03    0.18
 -10   2  -6    0.21    0.22
  10   2   6   -0.01    0.19
 -11  -2  -6    4.12    0.41
  11  -2   6    3.59    0.41
  11   2   6    4.24    0.45
 -11   2  -6    2.97    0.39
  12  -2   6    0.35    0.24
 -12  -2  -6    0.25    0.23
 -12   2  -6    0.32    0.25
  12   2   6    0.12    0.27
  13  -2   6    0.22    0.25
 -13  -2  -6    0.12    0.24
 -13   2  -6    0.50    0.29
  13   2   6    0.46    0.29
 -14   3   6    0.05    0.28
  13  -3  -6   -0.11    0.24
  13   3  -6   -0.27    0.23
 -13   3   6    0.15    0.25
 -12  -3   6    0.39    0.21
  12  -3  -6    0.48    0.26
  12   3  -6    0.63    0.27
 -12   3   6    0.13    0.22
  11  -3  -6   -0.07    0.19
 -11  -3   6    0.12    0.20
  11   3  -6   -0.12    0.20
 -11   3   6    0.02    0.20
  10  -3  -6    1.67    0.28
 -10  -3   6    1.89    0.28
  10   3  -6    2.07    0.32
 -10   3   6    1.29    0.25
   9  -3  -6    0.07    0.17
  -9  -3   6    0.58    0.19
  -9   3   6    0.12    0.19
   9   3  -6    0.13    0.21
  -8  -3   6    4.57    0.33
   8  -3  -6    5.05    0.40
   8   3  -6    4.71    0.39
  -8   3   6    4.15    0.37
   7  -3  -6    0.22    0.16
  -7  -3   6    0.38    0.12
  -7  -3   6    0.24    0.14
  -7   3   6    0.52    0.07
   7   3  -6    0.38    0.18
  -7   3   6    0.30    0.17
  -6  -3   6   16.61    0.54
   6  -3  -6   16.43    0.61
  -6  -3   6   16.75    0.59
  -6   3   6   16.37    0.62
   6   3  -6   16.89    0.61
  -6   3   6   16.22    0.48
   5  -3  -6    0.24    0.13
  -5  -3   6   -0.09    0.10
  -5  -3   6    0.15    0.10
   5   3  -6   -0.10    0.11
  -5   3   6    0.34    0.13
  -4  -3   6    5.96    0.29
  -4  -3   6    6.15    0.29
   4  -3  -6    5.78    0.31
  -4   3   6    6.05    0.31
   4   3  -6    6.87    0.32
  -3  -3   6    1.42    0.15
   3  -3  -6    1.18    0.15
  -3  -3   6    1.36    0.16
  -3  -3   6    1.44    0.15
   3   3  -6    1.37    0.16
  -3   3   6    1.09    0.15
  -2  -3   6    6.00    0.28
   2  -3  -6    5.69    0.26
  -2  -3   6    5.92    0.25
  -2  -3   6    5.74    0.28
  -2   3   6    5.84    0.26
   2   3  -6    5.55    0.26
  -1  -3   6    0.71    0.12
  -1  -3   6    0.60    0.10
   1  -3  -6    0.72    0.11
  -1   3   6    0.68    0.12
   1   3  -6    0.83    0.11
   1   3  -6    0.63    0.11
  -1   3   6    0.76    0.12
   0  -3  -6    6.82    0.27
   0  -3   6    6.53    0.28
   0  -3   6    6.66    0.27
   0   3   6    6.59    0.28
   0   3  -6    6.70    0.27
   0   3  -6    6.68    0.27
   1  -3   6   21.22    0.59
   1  -3   6   20.56    0.61
  -1  -3  -6   21.22    0.59
   1   3   6   20.34    0.52
  -1   3  -6   20.66    0.60
   1   3   6   20.38    0.61
   2  -3   6    5.35    0.25
   2  -3   6    4.61    0.24
  -2  -3  -6    4.88    0.24
  -2  -3  -6    4.91    0.17
  -2   3  -6    4.85    0.25
   2   3   6    4.95    0.26
   3  -3   6    5.16    0.27
  -3  -3  -6    5.15    0.26
  -3   3  -6    5.00    0.26
   3   3   6    5.82    0.29
  -4  -3  -6    1.51    0.17
   4  -3   6    1.45    0.17
   4   3   6    1.40    0.18
  -4   3  -6    1.41    0.17
  -5  -3  -6   14.15    0.52
   5  -3   6   14.85    0.54
   5   3   6   13.68    0.54
  -5   3  -6   14.54    0.54
   6  -3   6    9.45    0.45
  -6  -3  -6    9.36    0.43
  -6   3  -6    9.21    0.43
   6   3   6    8.84    0.45
   7  -3   6    0.32    0.18
  -7  -3  -6    0.37    0.16
   7   3   6    0.52    0.19
  -7   3  -6    0.30    0.17
  -8  -3  -6    5.59    0.40
   8  -3   6    6.26    0.43
  -8   3  -6    6.22    0.40
   8   3   6    5.37    0.40
   9  -3   6    0.22    0.18
   9  -3   6    0.08    0.13
  -9  -3  -6    0.14    0.17
  -9   3  -6   -0.23    0.17
   9   3   6   -0.35    0.16
  10  -3   6    0.01    0.18
 -10  -3  -6   -0.08    0.17
  10   3   6    0.30    0.22
 -10   3  -6    0.10    0.22
  11  -3   6   -0.18    0.19
 -11  -3  -6   -0.27    0.17
 -11   3  -6    0.15    0.24
  11   3   6    0.26    0.24
  12  -3   6    0.78    0.29
 -12  -3  -6    1.06    0.28
  12   3   6    0.85    0.30
 -12   3  -6    1.01    0.31
  13  -3   6    0.56    0.28
  13   3   6   -0.03    0.28
 -13   3  -6    0.11    0.24
 -13   4   6    1.36    0.35
  13   4  -6    0.75    0.31
  12  -4  -6    0.24    0.24
 -12   4   6    0.32    0.24
  12   4  -6    0.01    0.25
 -11  -4   6    3.03    0.34
  11  -4  -6    2.92    0.36
 -11   4   6    2.18    0.35
  11   4  -6    3.12    0.39
  10  -4  -6    1.51    0.28
 -10  -4   6    1.98    0.28
  10   4  -6    1.02    0.26
 -10   4   6    0.91    0.25
   9  -4  -6    0.33    0.20
  -9  -4   6   -0.21    0.13
  -9   4   6   -0.22    0.16
   9   4  -6   -0.03    0.19
   8  -4  -6    7.86    0.48
  -8  -4   6    8.13    0.42
  -8   4   6    8.20    0.48
   8   4  -6    7.46    0.44
   7  -4  -6   -0.01    0.16
  -7  -4   6   -0.03    0.12
  -7  -4   6    0.10    0.14
  -7   4   6   -0.15    0.07
  -7   4   6    0.03    0.15
   7   4  -6   -0.15    0.14
  -6  -4   6    0.32    0.13
  -6  -4   6    0.16    0.13
   6  -4  -6    0.39    0.16
   6   4  -6    0.39    0.16
  -6   4   6    0.55    0.10
  -6   4   6    0.30    0.16
  -5  -4   6    3.79    0.25
   5  -4  -6    2.99    0.25
  -5  -4   6    3.05    0.23
  -5   4   6    3.11    0.21
  -5   4   6    3.04    0.24
   5   4  -6    2.88    0.25
   4  -4  -6    8.07    0.34
  -4  -4   6    7.09    0.31
  -4  -4   6    7.23    0.31
  -4  -4   6    6.87    0.33
   4   4  -6    7.05    0.34
  -4   4   6    7.35    0.34
   3  -4  -6    0.43    0.11
  -3  -4   6    0.34    0.13
  -3  -4   6    0.28    0.10
  -3  -4   6    0.42    0.13
   3   4  -6    0.36    0.11
  -3   4   6    0.50    0.13
  -2  -4   6   33.79    0.97
  -2  -4   6   32.98    0.94
   2  -4  -6   32.59    0.90
  -2  -4   6   33.55    0.88
   2   4  -6   35.23    0.91
   2   4  -6   32.87    0.90
  -2   4   6   34.30    0.93
  -1  -4   6    5.74    0.31
  -1  -4   6    6.24    0.23
  -1  -4   6    6.05    0.30
   1  -4  -6    5.81    0.25
  -1   4   6    6.09    0.26
  -1   4   6    5.88    0.26
   1   4  -6    5.89    0.26
   1   4  -6    5.49    0.25
  -1   4   6    5.74    0.26
   0  -4   6   41.91    1.11
   0  -4   6   42.12    1.05
   0  -4  -6   41.35    1.05
   0  -4   6   41.19    1.15
   0   4   6   41.75    1.08
   0   4   6   40.46    1.07
   0   4  -6   40.14    1.06
   0   4  -6   40.18    1.06
   1  -4   6    5.34    0.30
   1  -4   6    5.19    0.26
  -1  -4  -6    4.90    0.23
  -1  -4  -6    4.91    0.19
   1  -4   6    5.32    0.23
  -1   4  -6    4.95    0.25
   1   4   6    4.83    0.25
  -1   4  -6    5.05    0.24
   1   4   6    5.36    0.26
   2  -4   6   52.28    1.35
  -2  -4  -6   50.42    1.30
  -2  -4  -6   50.65    1.25
   2  -4   6   51.14    1.40
   2  -4   6   51.21    1.30
   2   4   6   51.26    1.34
  -2   4  -6   50.93    1.32
   3  -4   6   10.77    0.39
  -3  -4  -6   10.33    0.38
  -3  -4  -6   10.67    0.33
   3   4   6   10.64    0.41
  -3   4  -6   10.70    0.40
   4  -4   6   38.79    1.06
  -4  -4  -6   38.58    1.05
   4   4   6   37.38    1.08
  -4   4  -6   38.11    1.07
  -5  -4  -6    0.95    0.16
   5  -4   6    1.20    0.18
  -5   4  -6    1.11    0.18
   5   4   6    1.26    0.20
   6  -4   6    0.42    0.16
   6  -4   6    0.78    0.16
  -6  -4  -6    0.29    0.14
  -6   4  -6    0.63    0.17
   6   4   6    0.57    0.17
   7  -4   6    0.64    0.19
   7  -4   6    0.67    0.17
  -7  -4  -6    0.57    0.17
   7   4   6    0.63    0.20
  -7   4  -6    0.83    0.21
   8  -4   6    0.43    0.16
  -8  -4  -6    0.42    0.18
   8  -4   6    0.58    0.20
  -8   4  -6    0.37    0.19
   8   4   6    0.42    0.20
   9  -4   6    2.91    0.25
  -9  -4  -6    3.41    0.33
   9  -4   6    3.72    0.37
   9   4   6    2.55    0.34
  -9   4  -6    3.25    0.36
  10  -4   6    0.80    0.23
 -10  -4  -6    0.77    0.22
  10   4   6    0.72    0.26
 -10   4  -6    0.78    0.27
 -11  -4  -6    0.74    0.23
  11  -4   6    0.60    0.25
 -11   4  -6    0.69    0.26
  11   4   6    0.21    0.23
  12  -4   6    0.38    0.25
  12   4   6    0.21    0.27
 -12   4  -6    0.30    0.25
 -13   4  -6   -0.11    0.25
  13   4   6    0.29    0.27
 -13   5   6    0.38    0.26
  13   5  -6   -0.03    0.28
 -12   5   6    0.64    0.27
  12   5  -6    1.20    0.31
  11  -5  -6    0.54    0.25
 -11   5   6    0.80    0.26
  11   5  -6    0.40    0.24
  10  -5  -6    0.22    0.20
  10   5  -6   -0.18    0.20
 -10   5   6   -0.10    0.19
  -9  -5   6    0.73    0.19
   9  -5  -6    1.00    0.24
   9   5  -6    1.30    0.27
  -9   5   6    0.50    0.21
   8  -5  -6   -0.03    0.17
  -8  -5   6    0.22    0.16
  -8   5   6    0.03    0.17
   8   5  -6   -0.21    0.17
  -7  -5   6   10.28    0.45
  -7  -5   6   10.62    0.45
   7  -5  -6   10.47    0.49
   7   5  -6    9.72    0.48
  -7   5   6   10.20    0.49
  -7   5   6   10.33    0.38
   6  -5  -6   -0.14    0.13
  -6  -5   6    0.14    0.12
  -6  -5   6    0.04    0.13
   6   5  -6    0.15    0.15
  -6   5   6   -0.11    0.13
  -6   5   6   -0.02    0.10
   5  -5  -6   24.20    0.74
  -5  -5   6   23.26    0.76
  -5  -5   6   22.90    0.71
  -5  -5   6   23.40    0.71
   5   5  -6   23.35    0.75
  -5   5   6   24.68    0.77
  -5   5   6   23.99    0.72
  -4  -5   6    1.47    0.20
   4  -5  -6    1.67    0.17
  -4  -5   6    1.54    0.21
  -4  -5   6    1.56    0.15
  -4   5   6    1.58    0.17
  -4   5   6    1.65    0.19
   4   5  -6    1.64    0.19
  -3  -5   6    2.08    0.16
  -3  -5   6    2.26    0.23
   3  -5  -6    1.93    0.17
  -3  -5   6    2.30    0.23
   3   5  -6    1.91    0.18
  -3   5   6    2.10    0.20
   3   5  -6    2.44    0.18
  -2  -5   6    3.80    0.26
  -2  -5   6    3.87    0.27
   2  -5  -6    3.71    0.20
   2   5  -6    3.59    0.21
  -2   5   6    3.85    0.22
   2   5  -6    3.81    0.21
   1  -5  -6   54.47    1.33
  -1  -5   6   45.72    1.30
  -1  -5   6   54.41    1.42
  -1  -5   6   52.98    1.47
   1   5  -6   53.92    1.35
  -1   5   6   55.37    1.38
  -1   5   6   54.79    1.37
   1   5  -6   55.26    1.35
   0  -5   6   12.01    0.44
   0  -5   6   11.93    0.47
   0  -5   6   10.49    0.33
   0   5  -6   11.66    0.38
   0   5   6   11.60    0.39
   0   5  -6   11.37    0.38
   0   5   6   11.83    0.39
  -1  -5  -6   10.70    0.36
  -1  -5  -6   12.84    0.38
   1  -5   6   12.22    0.49
   1  -5   6   11.38    0.45
   1   5   6   12.58    0.41
  -1   5  -6   12.36    0.40
  -1   5  -6   12.03    0.40
   1   5   6   12.07    0.42
  -2  -5  -6   12.21    0.40
  -2  -5  -6   12.70    0.39
   2  -5   6   12.41    0.39
   2  -5   6   11.75    0.46
   2  -5   6   13.27    0.50
  -2   5  -6   12.89    0.44
   2   5   6   12.68    0.44
  -2   5  -6   12.49    0.43
   2   5   6   12.28    0.42
  -3  -5  -6    3.03    0.20
   3  -5   6    2.55    0.24
  -3  -5  -6    3.45    0.19
   3  -5   6    3.22    0.21
  -3   5  -6    3.13    0.22
   3   5   6    3.11    0.24
   4  -5   6    0.18    0.11
  -4  -5  -6    0.02    0.09
   4  -5   6   -0.02    0.13
  -4  -5  -6   -0.02    0.10
   4   5   6    0.09    0.12
  -4   5  -6   -0.08    0.11
   5  -5   6    0.86    0.18
  -5  -5  -6    0.79    0.14
   5  -5   6    1.11    0.17
  -5  -5  -6    0.82    0.15
  -5   5  -6    0.64    0.16
   5   5   6    0.62    0.16
   6  -5   6    1.22    0.20
  -6  -5  -6    1.26    0.19
   6  -5   6    1.08    0.19
   6   5   6    0.94    0.20
  -6   5  -6    0.99    0.19
   7  -5   6    0.31    0.16
  -7  -5  -6    0.35    0.15
   7  -5   6    0.50    0.18
  -7   5  -6    0.48    0.19
   7   5   6    0.42    0.19
  -8  -5  -6    3.30    0.30
   8  -5   6    3.11    0.28
   8  -5   6    2.36    0.29
  -8   5  -6    2.56    0.31
   8   5   6    2.91    0.33
  -9  -5  -6    1.73    0.25
   9  -5   6    1.17    0.20
   9  -5   6    1.24    0.25
  -9   5  -6    1.20    0.27
   9   5   6    1.13    0.25
  10  -5   6    0.30    0.20
  10   5   6   -0.31    0.20
 -10   5  -6   -0.04    0.21
 -11   5  -6    0.02    0.21
  11   5   6    0.03    0.24
  12   5   6   -0.25    0.24
 -12   5  -6    0.18    0.25
 -13   5  -6    0.43    0.29
  13   5   6    0.36    0.30
 -13   6   6   -0.13    0.26
  13   6  -6   -0.23    0.26
  12   6  -6   -0.22    0.22
 -12   6   6    0.13    0.25
 -11   6   6    0.57    0.25
  11   6  -6    0.48    0.24
 -10   6   6    0.00    0.21
  10   6  -6   -0.27    0.19
   9  -6  -6    0.47    0.20
  -9   6   6    0.40    0.20
   9   6  -6    0.22    0.21
   8  -6  -6    0.66    0.20
  -8  -6   6    0.56    0.17
   8   6  -6    0.41    0.20
  -8   6   6    0.66    0.20
  -7  -6   6    1.17    0.20
   7  -6  -6    1.11    0.21
  -7  -6   6    1.21    0.18
  -7   6   6    0.69    0.20
  -7   6   6    1.00    0.15
   7   6  -6    1.14    0.23
  -6  -6   6    2.96    0.23
  -6  -6   6    3.00    0.28
  -6  -6   6    3.44    0.25
   6  -6  -6    3.31    0.27
  -6   6   6    2.89    0.29
   6   6  -6    2.64    0.27
  -5  -6   6    3.93    0.24
  -5  -6   6    4.28    0.32
  -5  -6   6    3.83    0.29
   5  -6  -6    3.77    0.27
  -5   6   6    4.04    0.29
   5   6  -6    4.35    0.31
  -4  -6   6    7.26    0.40
  -4  -6   6    8.43    0.41
   4  -6  -6    8.19    0.34
  -4   6   6    8.60    0.37
   4   6  -6    8.06    0.36
   3  -6  -6    4.88    0.24
  -3  -6   6    4.66    0.31
  -3  -6   6    5.00    0.20
  -3  -6   6    4.53    0.31
   3   6  -6    5.00    0.25
   3   6  -6    5.02    0.26
  -3   6   6    4.79    0.26
  -2  -6   6   -0.15    0.12
   2  -6  -6    0.03    0.03
  -2  -6   6    0.05    0.06
  -2  -6   6    0.23    0.13
   2   6  -6    0.06    0.09
  -2   6   6   -0.04    0.09
   2   6  -6    0.06    0.09
  -2   6   6   -0.17    0.09
   1  -6  -6    2.23    0.14
  -1  -6   6    2.28    0.24
  -1  -6   6    2.62    0.25
  -1   6   6    2.66    0.19
  -1   6   6    2.53    0.18
   1   6  -6    2.34    0.18
   1   6  -6    2.28    0.17
   0  -6   6    2.61    0.24
   0  -6  -6    3.17    0.15
   0  -6   6    3.16    0.28
   0   6  -6    3.25    0.20
   0   6   6    3.19    0.20
   0   6   6    3.47    0.20
   0   6  -6    3.05    0.19
  -1  -6  -6    2.58    0.18
   1  -6   6    2.81    0.25
  -1  -6  -6    2.62    0.14
   1  -6   6    2.52    0.25
   1  -6   6    2.59    0.12
   1   6   6    2.46    0.20
  -1   6  -6    2.48    0.18
  -1   6  -6    2.29    0.18
   1   6   6    2.50    0.19
   2  -6   6    9.27    0.43
   2  -6   6   10.03    0.45
   2  -6   6    9.33    0.30
  -2  -6  -6    9.15    0.34
  -2   6  -6    9.28    0.36
   2   6   6    9.47    0.36
  -2   6  -6   10.28    0.37
   2   6   6    9.49    0.37
  -3  -6  -6    0.91    0.11
  -3  -6  -6    1.19    0.14
   3  -6   6    1.32    0.20
   3  -6   6    0.68    0.10
  -3   6  -6    0.95    0.15
   3   6   6    1.12    0.16
   4  -6   6    0.04    0.09
  -4  -6  -6    0.02    0.11
  -4  -6  -6    0.12    0.10
   4  -6   6   -0.04    0.13
  -4   6  -6   -0.14    0.11
   4   6   6    0.00    0.12
   5  -6   6    2.02    0.20
  -5  -6  -6    1.91    0.19
   5  -6   6    1.76    0.23
  -5  -6  -6    1.68    0.18
   5   6   6    1.57    0.22
  -5   6  -6    1.67    0.21
  -6  -6  -6   -0.02    0.12
   6  -6   6    0.10    0.15
   6  -6   6   -0.10    0.13
  -6  -6  -6   -0.06    0.12
  -6   6  -6   -0.09    0.14
   6   6   6   -0.12    0.15
  -7  -6  -6    1.09    0.19
   7  -6   6    1.24    0.21
   7  -6   6    1.34    0.22
   7   6   6    1.16    0.24
  -7   6  -6    0.85    0.21
   8  -6   6    2.73    0.29
  -8  -6  -6    2.42    0.27
   8  -6   6    2.33    0.26
   8   6   6    2.54    0.32
  -8   6  -6    2.44    0.32
   9  -6   6    0.68    0.18
   9   6   6    0.84    0.24
  -9   6  -6    1.12    0.26
 -10   6  -6    0.54    0.24
  10   6   6    0.39    0.24
  11   6   6   -0.09    0.21
 -11   6  -6   -0.06    0.21
  12   6   6   -0.18    0.25
 -12   6  -6   -0.12    0.22
  12   7  -6    0.41    0.28
 -12   7   6    0.64    0.30
  11   7  -6    2.40    0.37
 -11   7   6    2.84    0.39
  10   7  -6    0.16    0.22
 -10   7   6    0.06    0.21
   9   7  -6   -0.13    0.20
  -9   7   6    0.03    0.18
  -8   7   6    0.62    0.21
   8   7  -6    0.67    0.21
   7  -7  -6    0.65    0.18
  -7  -7   6    0.54    0.19
  -7  -7   6    0.65    0.22
  -7   7   6    0.75    0.21
   7   7  -6    0.78    0.21
   6  -7  -6   15.20    0.55
  -6  -7   6   14.05    0.60
  -6  -7   6   15.40    0.65
   6   7  -6   16.02    0.60
  -6   7   6   16.96    0.63
  -5  -7   6    0.24    0.17
   5  -7  -6    0.22    0.12
  -5  -7   6    0.12    0.06
  -5  -7   6    0.43    0.19
  -5   7   6    0.35    0.16
   5   7  -6    0.17    0.15
   4  -7  -6    1.21    0.14
  -4  -7   6    1.22    0.11
  -4  -7   6    0.82    0.21
  -4  -7   6    1.11    0.20
   4   7  -6    1.34    0.17
  -4   7   6    0.92    0.17
   4   7  -6    1.09    0.17
   3  -7  -6    0.28    0.08
  -3  -7   6    0.42    0.18
  -3  -7   6    0.23    0.15
   3   7  -6    0.27    0.11
  -3   7   6    0.21    0.13
   3   7  -6    0.36    0.12
  -2  -7   6   11.10    0.48
  -2  -7   6   10.86    0.50
   2  -7  -6   11.21    0.33
   2   7  -6   11.03    0.39
   2   7  -6   11.25    0.39
  -2   7   6   11.58    0.41
  -2   7   6   11.14    0.41
  -1  -7   6    0.08    0.15
  -1  -7   6   -0.07    0.14
   1   7  -6    0.11    0.09
  -1   7   6    0.13    0.10
  -1   7   6    0.20    0.10
   1   7  -6   -0.04    0.07
   0  -7   6    5.28    0.35
   0  -7   6    4.48    0.31
   0   7   6    4.48    0.25
   0   7   6    4.84    0.25
   0   7  -6    5.16    0.24
   0   7  -6    4.89    0.23
   1  -7   6    0.03    0.14
   1  -7   6    0.09    0.14
  -1  -7  -6    0.10    0.11
   1   7   6   -0.04    0.09
  -1   7  -6   -0.03    0.09
  -1   7  -6    0.00    0.08
   1   7   6   -0.16    0.09
   2  -7   6    0.11    0.15
   2  -7   6    0.26    0.16
  -2  -7  -6    0.34    0.13
   2   7   6   -0.01    0.09
  -2   7  -6    0.09    0.09
   2   7   6    0.14    0.11
  -2   7  -6    0.01    0.10
  -3  -7  -6    1.12    0.11
   3  -7   6    0.75    0.20
   3  -7   6    1.23    0.12
  -3  -7  -6    1.15    0.16
  -3   7  -6    1.04    0.16
  -3   7  -6    0.77    0.15
   3   7   6    1.00    0.15
   3   7   6    1.09    0.17
   4  -7   6    2.51    0.28
  -4  -7  -6    2.74    0.22
   4   7   6    2.21    0.23
  -4   7  -6    2.47    0.23
  -5  -7  -6   15.93    0.53
  -5  -7  -6   16.93    0.57
   5  -7   6   16.24    0.55
   5  -7   6   16.81    0.65
   5   7   6   17.18    0.62
  -5   7  -6   16.38    0.60
   6  -7   6    0.96    0.21
  -6  -7  -6    1.37    0.19
   6  -7   6    1.42    0.19
  -6   7  -6    1.10    0.21
   6   7   6    1.17    0.22
   7  -7   6    1.27    0.23
  -7  -7  -6    1.04    0.19
   7   7   6    1.28    0.24
  -7   7  -6    1.26    0.24
   8  -7   6    4.41    0.35
  -8  -7  -6    5.01    0.32
   8   7   6    4.60    0.41
  -8   7  -6    3.98    0.38
  -9  -7  -6    0.44    0.17
   9  -7   6    0.17    0.16
   9   7   6   -0.02    0.19
  -9   7  -6    0.17    0.21
 -10   7  -6   -0.07    0.19
  10   7   6    0.18    0.24
 -11   7  -6   -0.05    0.22
  11   7   6    0.47    0.25
 -12   7  -6   -0.12    0.21
  12   7   6    0.29    0.27
 -12   8   6   -0.14    0.26
  12   8  -6    0.38    0.28
 -11  -8   6    0.52    0.26
  11   8  -6    0.26    0.25
 -11   8   6    0.58    0.27
 -10  -8   6    0.34    0.25
 -10   8   6    0.07    0.20
  10   8  -6    0.39    0.23
  -9  -8   6    1.04    0.29
   9   8  -6    1.45    0.28
  -9   8   6    0.49    0.24
  -8  -8   6    1.42    0.29
   8   8  -6    1.33    0.26
  -8   8   6    1.47    0.27
  -7  -8   6    0.77    0.23
  -7  -8   6    0.84    0.22
  -7   8   6    0.55    0.20
   7   8  -6    0.85    0.21
  -6  -8   6    4.36    0.35
  -6  -8   6    3.73    0.36
  -6   8   6    4.11    0.32
   6   8  -6    3.52    0.31
  -5  -8   6    3.78    0.36
  -5  -8   6    3.57    0.33
   5   8  -6    4.25    0.31
  -5   8   6    3.77    0.29
  -4  -8   6    1.24    0.24
  -4  -8   6    1.33    0.24
   4   8  -6    1.31    0.18
  -4   8   6    1.14    0.18
  -3  -8   6    5.22    0.36
  -3  -8   6    4.94    0.36
  -3   8   6    4.39    0.27
  -3   8   6    4.87    0.30
   3   8  -6    4.48    0.27
   3   8  -6    5.25    0.26
  -2  -8   6    0.87    0.21
  -2  -8   6    0.65    0.19
   2   8  -6    0.86    0.13
  -2   8   6    0.72    0.12
  -2   8   6    0.85    0.15
   2   8  -6    0.96    0.14
  -1  -8   6    7.34    0.42
  -1  -8   6    6.43    0.38
   1   8  -6    6.17    0.27
  -1   8   6    6.79    0.30
   1   8  -6    6.37    0.27
  -1   8   6    6.48    0.29
  -1   8   6    6.40    0.29
   0  -8   6    3.31    0.32
   0  -8   6    4.04    0.35
   0   8  -6    3.31    0.21
   0   8   6    3.43    0.22
   0   8   6    3.39    0.22
   0   8  -6    3.41    0.20
   1  -8   6    0.47    0.18
   1  -8   6    0.71    0.19
  -1  -8  -6    0.81    0.16
   1   8   6    0.69    0.12
  -1   8  -6    0.65    0.12
   1   8   6    0.42    0.12
  -1   8  -6    0.62    0.12
   2  -8   6    8.53    0.46
   2  -8   6    8.39    0.46
  -2  -8  -6    8.29    0.37
   2   8   6    8.16    0.36
  -2   8  -6    8.40    0.35
   2   8   6    8.55    0.35
  -2   8  -6    8.90    0.35
   3  -8   6    0.07    0.16
  -3  -8  -6    0.12    0.13
   3   8   6    0.02    0.11
  -3   8  -6    0.25    0.12
   3   8   6   -0.06    0.12
  -3   8  -6   -0.06    0.10
   4  -8   6    1.59    0.25
  -4  -8  -6    1.52    0.20
   4   8   6    1.23    0.19
  -4   8  -6    1.17    0.18
  -5  -8  -6   -0.15    0.13
   5  -8   6    0.01    0.16
  -5   8  -6    0.09    0.15
   5   8   6    0.01    0.15
  -6  -8  -6    0.67    0.17
   6  -8   6    0.33    0.19
   6   8   6    0.43    0.18
  -6   8  -6    0.21    0.17
   7  -8   6    0.18    0.17
  -7  -8  -6    0.18    0.16
   7   8   6    0.32    0.18
  -7   8  -6    0.30    0.19
   8  -8   6    0.15    0.17
  -8  -8  -6    0.06    0.15
  -8   8  -6    0.10    0.19
   8   8   6    0.07    0.18
   9  -8   6    0.89    0.23
  -9  -8  -6    1.03    0.22
   9   8   6    0.98    0.26
  -9   8  -6    0.51    0.23
 -10  -8  -6   -0.02    0.17
 -10   8  -6   -0.01    0.22
  10   8   6    0.21    0.23
 -11  -8  -6    0.05    0.18
  11   8   6    0.05    0.24
 -11   8  -6   -0.21    0.22
 -12   8  -6    0.92    0.31
  12   8   6    1.22    0.33
 -11  -9   6    0.45    0.30
  11   9  -6    0.57    0.28
 -11   9   6    0.22    0.27
 -10  -9   6    1.52    0.34
 -10   9   6    1.46    0.31
  10   9  -6    1.21    0.29
  -9  -9   6    1.58    0.31
   9   9  -6    1.82    0.30
  -9   9   6    1.33    0.28
  -8  -9   6    1.53    0.30
  -8   9   6    1.37    0.27
   8   9  -6    1.56    0.27
  -7  -9   6    1.24    0.28
   7   9  -6    1.98    0.26
  -7   9   6    2.27    0.29
  -6  -9   6    0.78    0.23
  -6  -9   6    0.87    0.24
  -6   9   6    0.94    0.20
   6   9  -6    0.85    0.20
  -5  -9   6    0.60    0.21
  -5  -9   6    0.05    0.19
  -5   9   6    0.14    0.15
   5   9  -6    0.09    0.14
  -4  -9   6    0.51    0.20
  -4  -9   6    0.31    0.22
  -4   9   6    0.04    0.14
   4   9  -6    0.24    0.14
  -3  -9   6   -0.14    0.16
  -3  -9   6    0.13    0.18
  -3   9   6    0.03    0.12
   3   9  -6   -0.06    0.12
  -2  -9   6    1.76    0.27
  -2  -9   6    1.89    0.27
   2   9  -6    2.12    0.17
  -2   9   6    2.09    0.20
   2   9  -6    2.01    0.17
  -1  -9   6    1.13    0.23
  -1  -9   6    1.32    0.25
  -1   9   6    1.43    0.16
   1   9  -6    1.12    0.14
  -1   9   6    1.02    0.14
   1   9  -6    1.45    0.14
  -1   9   6    1.13    0.15
   0  -9   6    5.57    0.40
   0  -9   6    5.73    0.38
   0   9  -6    5.76    0.26
   0   9  -6    5.58    0.26
   0   9   6    5.44    0.28
   0   9   6    5.23    0.28
   1  -9   6    2.49    0.30
   1  -9   6    2.53    0.31
  -1  -9  -6    2.70    0.26
  -1   9  -6    2.79    0.20
   1   9   6    2.71    0.20
   1   9   6    2.86    0.22
  -1   9  -6    2.74    0.20
  -2  -9  -6   13.72    0.53
   2  -9   6   14.82    0.65
   2  -9   6   14.66    0.63
  -2   9  -6   13.79    0.49
   2   9   6   14.46    0.50
   3  -9   6   -0.06    0.18
  -3  -9  -6    0.07    0.14
   3   9   6    0.03    0.12
  -3   9  -6    0.09    0.13
  -4  -9  -6    0.55    0.16
   4  -9   6    0.35    0.19
  -4   9  -6    0.16    0.14
   4   9   6    0.44    0.15
   5  -9   6    1.80    0.27
  -5  -9  -6    1.92    0.22
  -5   9  -6    1.81    0.23
   5   9   6    2.01    0.24
   6  -9   6   -0.23    0.15
  -6  -9  -6   -0.15    0.13
   6   9   6   -0.02    0.15
  -6   9  -6   -0.16    0.14
  -7  -9  -6   -0.02    0.15
   7  -9   6    0.00    0.16
   7   9   6   -0.33    0.15
  -7   9  -6    0.04    0.18
  -8  -9  -6    0.56    0.20
   8  -9   6    0.60    0.23
  -8   9  -6    0.68    0.23
   8   9   6    0.70    0.24
  -9  -9  -6    0.76    0.21
  -9   9  -6    0.76    0.26
   9   9   6    0.49    0.24
 -10  -9  -6   -0.01    0.17
  10   9   6    0.26    0.24
 -10   9  -6   -0.07    0.22
 -11   9  -6    0.39    0.26
  11   9   6    0.01    0.23
 -11 -10   6    0.57    0.30
  11  10  -6    0.21    0.26
 -11  10   6    0.41    0.27
 -10 -10   6    0.50    0.26
 -10  10   6   -0.05    0.23
  10  10  -6    0.41    0.26
  -9 -10   6   -0.10    0.21
  -9  10   6    0.10    0.22
   9  10  -6   -0.06    0.20
  -8 -10   6    0.23    0.21
   8  10  -6    0.15    0.21
  -8  10   6    0.16    0.21
  -7 -10   6    0.12    0.23
   7  10  -6    0.08    0.18
  -7  10   6    0.24    0.18
  -6 -10   6    1.16    0.26
  -6 -10   6    1.56    0.31
   6  10  -6    1.43    0.23
  -6  10   6    1.05    0.23
  -5 -10   6    2.29    0.32
  -5 -10   6    2.36    0.33
  -5  10   6    2.19    0.25
   5  10  -6    1.94    0.23
  -4 -10   6    0.12    0.19
  -4 -10   6    0.12    0.21
  -4  10   6    0.20    0.15
   4  10  -6    0.09    0.13
  -3 -10   6    2.57    0.33
  -3 -10   6    2.06    0.30
  -3  10   6    2.59    0.23
   3  10  -6    2.58    0.21
  -2 -10   6    1.10    0.24
  -2 -10   6    1.27    0.25
  -2  10   6    0.69    0.15
   2  10  -6    1.02    0.14
  -1 -10   6    0.22    0.19
  -1 -10   6    0.31    0.22
  -1  10   6    0.20    0.11
   1  10  -6    0.19    0.11
   0 -10   6    0.68    0.22
   0 -10   6    0.66    0.24
   0  10  -6    0.51    0.12
   0  10   6    0.61    0.13
   1 -10   6    0.93    0.25
  -1 -10  -6    0.93    0.20
   1 -10   6    1.33    0.26
  -1  10  -6    1.42    0.16
   1  10   6    1.19    0.16
   2 -10   6    2.36    0.32
  -2 -10  -6    2.43    0.26
   2 -10   6    2.00    0.30
  -2  10  -6    2.00    0.19
   2  10   6    2.15    0.20
   3 -10   6    0.19    0.19
  -3 -10  -6    0.21    0.16
   3  10   6    0.09    0.13
  -3  10  -6    0.05    0.13
   4 -10   6    2.27    0.31
  -4 -10  -6    2.39    0.26
   4  10   6    2.04    0.23
  -4  10  -6    2.49    0.24
  -5 -10  -6    0.11    0.16
   5 -10   6    0.04    0.18
  -5  10  -6   -0.02    0.14
   5  10   6    0.05    0.16
  -6 -10  -6    1.03    0.21
   6 -10   6    1.77    0.29
   6  10   6    1.30    0.22
  -6  10  -6    1.13    0.22
  -7 -10  -6    0.39    0.19
   7 -10   6    0.93    0.26
  -7  10  -6    1.25    0.24
   7  10   6    0.66    0.23
  -8 -10  -6    0.10    0.17
   8 -10   6   -0.31    0.18
   8  10   6    0.05    0.19
  -8  10  -6   -0.32    0.19
  -9 -10  -6    0.42    0.20
  -9  10  -6    0.20    0.22
   9  10   6    0.30    0.23
  10  10   6    1.87    0.33
 -10  10  -6    0.73    0.29
 -10 -11   6    0.34    0.27
  10  11  -6   -0.03    0.24
 -10  11   6    0.41    0.26
  -9 -11   6    0.06    0.23
  -9  11   6   -0.25    0.21
   9  11  -6   -0.16    0.21
  -8 -11   6    0.16    0.24
  -8  11   6    0.25    0.21
   8  11  -6    0.04    0.20
  -7 -11   6    0.54    0.25
  -7  11   6    0.58    0.22
   7  11  -6    0.53    0.20
  -6 -11   6    0.10    0.23
  -6 -11   6    0.16    0.21
   6  11  -6    0.33    0.18
  -6  11   6   -0.01    0.17
  -5 -11   6    0.49    0.22
  -5 -11   6    0.42    0.23
  -5  11   6    0.46    0.18
   5  11  -6    0.37    0.16
  -4 -11   6   -0.03    0.21
  -4 -11   6   -0.04    0.18
  -4  11   6   -0.03    0.14
   4  11  -6    0.03    0.13
  -3 -11   6   -0.01    0.20
  -3 -11   6   -0.35    0.17
   3  11  -6   -0.25    0.10
  -3  11   6    0.14    0.14
  -2 -11   6   -0.14    0.19
  -2 -11   6    0.17    0.20
   2  11  -6    0.26    0.11
  -2  11   6   -0.03    0.11
  -1 -11   6    0.31    0.20
  -1 -11   6    0.55    0.23
  -1  11   6    0.30    0.12
   1  11  -6    0.36    0.11
   0 -11   6    0.27    0.22
   0 -11   6    0.35    0.23
   0  11   6    0.61    0.13
   0  11  -6    0.45    0.11
  -1 -11  -6    1.45    0.24
   1 -11   6    1.33    0.29
   1 -11   6    1.51    0.30
   1  11   6    1.38    0.17
  -1  11  -6    1.64    0.16
   2 -11   6    0.60    0.26
  -2 -11  -6    0.69    0.21
   2 -11   6    1.15    0.26
   2  11   6    0.83    0.16
  -2  11  -6    0.93    0.15
   3 -11   6    0.54    0.23
  -3 -11  -6    0.33    0.17
  -3  11  -6    0.31    0.14
   3  11   6    0.22    0.13
  -4 -11  -6    0.11    0.17
   4 -11   6    0.24    0.22
   4  11   6    0.43    0.16
  -4  11  -6    0.72    0.18
  -5 -11  -6   -0.21    0.15
   5 -11   6    0.01    0.21
   5  11   6   -0.07    0.14
  -5  11  -6   -0.10    0.14
  -6 -11  -6    1.27    0.24
   6 -11   6    1.44    0.29
  -6  11  -6    1.45    0.25
   6  11   6    1.67    0.25
  -7 -11  -6    1.32    0.24
   7 -11   6    1.68    0.32
  -7  11  -6    1.40    0.27
   7  11   6    1.16    0.24
   8 -11   6    2.12    0.33
  -8 -11  -6    1.51    0.25
  -8  11  -6    1.68    0.30
   8  11   6    1.96    0.30
   9  11   6   -0.20    0.22
  -9  11  -6    0.00    0.23
 -10  11  -6   -0.25    0.23
  10  11   6   -0.02    0.24
  -9 -12   6    0.02    0.24
  -9  12   6   -0.26    0.19
   9  12  -6   -0.21    0.21
  -8 -12   6    0.77    0.29
   8  12  -6    0.96    0.26
  -8  12   6    1.27    0.28
  -7 -12   6    0.30    0.26
   7  12  -6    0.11    0.19
  -7  12   6   -0.06    0.18
  -6 -12   6    1.19    0.29
   6  12  -6    1.71    0.24
  -6  12   6    1.68    0.26
  -5 -12   6    0.53    0.26
  -5 -12   6    0.47    0.24
   5  12  -6    0.92    0.19
  -5  12   6    0.37    0.18
  -4 -12   6    0.00    0.22
  -4 -12   6   -0.18    0.19
   4  12  -6    0.04    0.13
  -4  12   6   -0.07    0.14
  -3 -12   6    2.09    0.33
  -3 -12   6    1.28    0.31
   3  12  -6    1.82    0.19
  -3  12   6    1.46    0.20
  -2 -12   6   -0.08    0.21
  -2 -12   6    0.21    0.22
   2  12  -6    0.05    0.10
  -2  12   6   -0.04    0.12
  -2  12   6   -0.01    0.12
  -1 -12   6    0.33    0.22
  -1 -12   6    0.06    0.21
  -1  12   6    0.06    0.12
   1  12  -6    0.22    0.10
   0 -12   6    3.34    0.38
   0 -12   6    2.26    0.35
   0  12   6    2.75    0.22
   0  12  -6    2.63    0.21
   1 -12   6    1.29    0.29
   1 -12   6    1.03    0.28
  -1 -12  -6    1.46    0.26
   1  12   6    1.25    0.17
  -1  12  -6    1.53    0.16
   2 -12   6    0.44    0.24
  -2 -12  -6    0.44    0.19
   2 -12   6    0.26    0.23
  -2  12  -6    0.61    0.14
   2  12   6    0.30    0.14
  -3 -12  -6   -0.17    0.17
   3 -12   6   -0.31    0.21
   3  12   6   -0.03    0.13
  -3  12  -6    0.36    0.14
  -4 -12  -6   -0.24    0.17
   4 -12   6   -0.05    0.21
   4  12   6   -0.02    0.14
  -4  12  -6   -0.23    0.12
   5 -12   6    0.04    0.21
  -5 -12  -6    0.02    0.18
   5  12   6    0.34    0.17
  -5  12  -6    0.23    0.17
  -6 -12  -6   -0.13    0.16
   6 -12   6    0.20    0.24
   6  12   6   -0.03    0.16
  -6  12  -6    0.38    0.19
   7 -12   6   -0.08    0.22
  -7 -12  -6   -0.02    0.18
   7  12   6    0.18    0.20
  -7  12  -6   -0.10    0.19
   8 -12   6    0.00    0.23
  -8 -12  -6   -0.17    0.17
  -8  12  -6    0.11    0.22
   8  12   6   -0.28    0.19
  -9  12  -6    2.11    0.34
   9  12   6    2.51    0.35
  -8 -13   6    0.27    0.28
   8  13  -6    0.09    0.21
  -8  13   6    0.08    0.23
  -7 -13   6    1.11    0.32
   7  13  -6    1.26    0.25
  -7  13   6    1.43    0.27
  -6 -13   6   -0.12    0.24
   6  13  -6    0.48    0.19
  -6  13   6   -0.34    0.16
  -5 -13   6    3.13    0.42
   5  13  -6    2.49    0.25
  -5  13   6    2.13    0.27
  -4 -13   6   -0.36    0.19
  -4 -13   6    0.22    0.24
   4  13  -6    0.11    0.13
  -4  13   6   -0.18    0.14
  -3 -13   6    0.27    0.25
  -3 -13   6    0.20    0.23
   3  13  -6   -0.01    0.11
  -3  13   6    0.13    0.14
  -2 -13   6   -0.02    0.22
  -2 -13   6    0.28    0.25
  -2  13   6    0.14    0.13
   2  13  -6    0.26    0.11
  -1 -13   6   -0.10    0.22
  -1 -13   6    0.40    0.25
  -1  13   6   -0.03    0.12
   1  13  -6    0.28    0.10
   0 -13   6    1.89    0.35
   0 -13   6    1.61    0.32
   0  13  -6    1.30    0.14
   0  13   6    1.59    0.18
   1 -13   6    0.84    0.28
   1 -13   6    0.43    0.25
   1  13   6    0.55    0.14
  -1  13  -6    0.44    0.12
   2 -13   6    0.21    0.24
  -2 -13  -6    0.07    0.18
   2 -13   6    0.31    0.27
  -2  13  -6    0.25    0.12
   2  13   6    0.04    0.12
   3 -13   6    1.59    0.34
  -3 -13  -6    1.70    0.28
   3  13   6    1.79    0.21
  -3  13  -6    1.68    0.21
  -4 -13  -6    0.15    0.19
   4 -13   6    0.43    0.26
   4  13   6    0.15    0.15
  -4  13  -6   -0.06    0.14
   5 -13   6    1.05    0.30
  -5 -13  -6    0.75    0.24
   5  13   6    0.66    0.19
  -5  13  -6    0.97    0.22
   6 -13   6    3.15    0.42
  -6 -13  -6    2.52    0.33
  -6  13  -6    3.32    0.33
   6  13   6    2.71    0.31
   7 -13   6    0.27    0.27
  -7  13  -6    0.05    0.20
   7  13   6   -0.19    0.18
   8 -13   6    2.14    0.38
   8  13   6    1.84    0.31
  -8  13  -6    1.92    0.32
  -7  14   6   -0.01    0.22
  -6 -14   6    0.60    0.30
   6  14  -6    0.55    0.20
  -6  14   6    0.44    0.21
  -5 -14   6    0.27    0.25
   5  14  -6    0.15    0.16
  -5  14   6    0.08    0.18
  -4 -14   6    0.40    0.28
   4  14  -6    0.15    0.13
  -4  14   6    0.09    0.16
  -3 -14   6   -0.04    0.22
  -3 -14   6    0.20    0.27
   3  14  -6   -0.04    0.11
  -3  14   6   -0.01    0.14
  -3  14   6    0.12    0.14
  -2 -14   6    0.66    0.28
  -2 -14   6    1.49    0.33
   2  14  -6    1.11    0.14
  -2  14   6    1.10    0.18
  -1 -14   6   -0.01    0.24
  -1 -14   6   -0.32    0.22
  -1  14   6    0.22    0.13
   0 -14   6    0.74    0.28
   0 -14   6    1.02    0.32
   0  14   6    0.82    0.15
   1 -14   6    1.09    0.32
   1 -14   6    1.25    0.33
  -1  14  -6    1.47    0.16
   1  14   6    1.20    0.16
  -2 -14  -6    0.09    0.22
   2 -14   6    0.17    0.25
  -2  14  -6   -0.03    0.12
   2  14   6   -0.13    0.12
  -3 -14  -6    0.32    0.21
   3 -14   6    0.34    0.28
   3  14   6    0.29    0.15
  -3  14  -6    0.15    0.14
  -4 -14  -6   -0.04    0.20
   4 -14   6   -0.37    0.22
   4  14   6    0.09    0.16
  -4  14  -6    0.11    0.15
  -5 -14  -6    0.10    0.21
   5 -14   6   -0.04    0.25
  -5  14  -6   -0.06    0.17
   5  14   6   -0.03    0.16
   6 -14   6   -0.31    0.23
  -6  14  -6    0.09    0.19
   6  14   6    0.38    0.20
  -5 -15   6    1.27    0.36
   5  15  -6    1.23    0.21
  -5  15   6    1.28    0.24
  -4 -15   6    0.39    0.30
  -4  15   6    0.55    0.19
  -3 -15   6    0.00    0.25
  -3  15   6    0.17    0.15
  -2 -15   6    0.01    0.25
  -2 -15   6    0.16    0.26
  -2  15   6    0.09    0.14
  -1 -15   6    0.47    0.31
  -1 -15   6    0.51    0.30
  -1  15   6    0.47    0.15
   0 -15   6    1.09    0.34
   0 -15   6    0.15    0.27
   1 -15   6    0.19    0.28
   1 -15   6   -0.09    0.24
   2 -15   6    1.61    0.38
   3 -15   6    0.70    0.31
  -3 -15  -6    0.31    0.23
  -3  15  -6    0.25    0.15
   3  15   6    0.43    0.15
   4 -15   6    0.10    0.26
  -4 -15  -6   -0.29    0.22
  -4  15  -6    0.10    0.16
   4  15   6   -0.03    0.15
 -14   0   7   -0.31    0.23
  14   0  -7   -0.21    0.25
  13   0  -7    0.13    0.25
 -13   0   7   -0.02    0.23
  12   0  -7    0.04    0.25
 -12   0   7    0.19    0.23
 -11   0   7   -0.23    0.18
  11   0  -7    0.04    0.23
 -10   0   7    0.16    0.18
  10   0  -7   -0.35    0.17
  -9   0   7   28.25    0.99
   9   0  -7   28.35    1.01
   8   0  -7    0.18    0.19
  -8   0   7   -0.11    0.16
   7   0  -7   14.44    0.58
  -7   0   7   13.73    0.39
  -7   0   7   13.87    0.57
  -6   0   7    0.02    0.14
   6   0  -7   -0.01    0.15
  -6   0   7    0.02    0.07
  -5   0   7   56.39    1.52
   5   0  -7   56.01    1.52
  -4   0   7    0.12    0.12
   4   0  -7    0.04    0.12
   3   0  -7   42.22    1.14
  -3   0   7   42.61    1.15
  -2   0   7   -0.07    0.09
   2   0  -7    0.06    0.09
  -2   0   7    0.02    0.09
  -1   0   7    8.58    0.32
   1   0  -7    8.08    0.32
   0   0   7    0.04    0.06
   0   0   7   -0.03    0.09
   0   0  -7   -0.14    0.08
   1   0   7    3.59    0.14
   1   0   7    3.31    0.23
  -1   0  -7    3.17    0.23
   2   0   7    0.04    0.10
  -2   0  -7   -0.05    0.09
  -3   0  -7   13.30    0.46
   3   0   7   12.58    0.47
  -4   0  -7   -0.03    0.11
   4   0   7   -0.13    0.12
  -5   0  -7    4.36    0.28
   5   0   7    4.63    0.31
  -6   0  -7   -0.03    0.14
   6   0   7   -0.03    0.13
   7   0   7    7.70    0.46
  -7   0  -7    7.58    0.44
   8   0   7    0.10    0.18
  -8   0  -7    0.10    0.17
  -9   0  -7    8.90    0.52
   9   0   7    8.50    0.51
  10   0   7   -0.34    0.17
 -10   0  -7    0.25    0.23
 -11   0  -7    4.84    0.47
  11   0   7    5.17    0.48
  12   0   7    0.43    0.25
 -12   0  -7   -0.02    0.23
  13   0   7    1.35    0.36
 -13   0  -7    2.10    0.37
  14  -1  -7    0.34    0.28
 -14  -1   7    0.53    0.29
  14   1  -7    0.48    0.32
 -14   1   7   -0.06    0.27
 -13  -1   7    0.74    0.28
  13  -1  -7    0.07    0.24
  13   1  -7   -0.25    0.27
 -13   1   7    0.40    0.27
  12  -1  -7    0.45    0.27
 -12  -1   7    0.31    0.24
  12   1  -7    0.04    0.23
 -12   1   7    0.24    0.23
  11  -1  -7    0.15    0.21
 -11  -1   7   -0.04    0.19
 -11   1   7    0.05    0.21
  11   1  -7   -0.30    0.18
  10  -1  -7    0.85    0.24
 -10  -1   7    1.03    0.25
  10   1  -7    1.03    0.25
 -10   1   7    0.77    0.23
  -9  -1   7    1.86    0.28
   9  -1  -7    2.43    0.32
  -9   1   7    1.84    0.29
   9   1  -7    1.92    0.31
   8  -1  -7    0.40    0.21
  -8  -1   7    0.28    0.17
   8   1  -7    0.14    0.20
  -8   1   7    0.53    0.20
  -7  -1   7    3.93    0.33
   7  -1  -7    3.66    0.33
  -7  -1   7    3.79    0.19
   7   1  -7    4.27    0.33
  -7   1   7    4.29    0.15
  -7   1   7    3.98    0.31
   6  -1  -7    1.67    0.23
  -6  -1   7    2.22    0.17
  -6  -1   7    1.72    0.22
  -6   1   7    1.44    0.21
   6   1  -7    1.88    0.23
  -5  -1   7    0.05    0.13
  -5  -1   7    0.07    0.09
   5  -1  -7    0.05    0.12
  -5   1   7   -0.02    0.13
   5   1  -7    0.21    0.14
   4  -1  -7   19.06    0.63
  -4  -1   7   19.29    0.63
  -4   1   7   19.67    0.63
   4   1  -7   19.32    0.63
   3  -1  -7    7.31    0.34
  -3  -1   7    7.31    0.32
  -3   1   7    7.86    0.34
   3   1  -7    7.22    0.32
  -2  -1   7    0.43    0.11
   2  -1  -7    0.15    0.10
   2   1  -7    0.26    0.11
  -2   1   7    0.19    0.11
  -2   1   7    0.19    0.11
   1  -1  -7   11.09    0.39
  -1  -1   7   10.31    0.39
  -1   1   7   11.43    0.40
   1   1  -7   11.28    0.40
   0  -1   7   63.24    1.59
   0  -1   7   63.26    1.53
   0  -1  -7   61.81    1.58
   0   1   7   62.24    1.59
   0   1  -7   62.54    1.58
  -1  -1  -7   76.21    1.89
   1  -1   7   75.69    1.89
   1  -1   7   75.38    1.82
  -1   1  -7   74.46    1.88
   1   1   7   74.74    1.89
  -2  -1  -7    1.63    0.09
   2  -1   7    1.38    0.16
  -2  -1  -7    1.63    0.16
  -2   1  -7    1.88    0.18
   2   1   7    1.57    0.17
  -3  -1  -7   12.73    0.45
   3  -1   7   12.51    0.46
   3   1   7   12.79    0.46
  -3   1  -7   12.57    0.45
  -4  -1  -7    5.42    0.29
   4  -1   7    4.96    0.29
  -4   1  -7    5.29    0.30
   4   1   7    5.20    0.30
  -5  -1  -7    8.54    0.41
   5  -1   7    9.05    0.40
  -5   1  -7    8.65    0.40
   5   1   7    8.65    0.41
  -6  -1  -7    2.97    0.27
   6  -1   7    3.05    0.29
  -6   1  -7    2.96    0.27
   6   1   7    2.82    0.28
  -7  -1  -7    4.66    0.37
   7  -1   7    6.00    0.41
  -7   1  -7    4.96    0.36
   7   1   7    5.29    0.37
  -8  -1  -7    1.89    0.28
   8  -1   7    2.28    0.31
  -8   1  -7    1.59    0.26
   8   1   7    1.16    0.24
   9  -1   7    0.67    0.25
  -9  -1  -7    0.11    0.18
   9   1   7    1.20    0.28
  -9   1  -7    0.67    0.22
 -10  -1  -7    0.78    0.25
  10  -1   7    0.64    0.23
  10   1   7    0.68    0.26
 -10   1  -7    0.62    0.23
 -11  -1  -7    0.92    0.27
  11  -1   7    1.36    0.32
  11   1   7    1.01    0.29
 -11   1  -7    1.27    0.30
  12  -1   7    1.04    0.33
 -12  -1  -7    0.97    0.29
 -12   1  -7    1.32    0.32
  12   1   7    1.56    0.34
 -13  -1  -7   -0.06    0.22
  13  -1   7    0.21    0.28
 -13   1  -7    0.18    0.23
  13   1   7    0.29    0.28
  14  -2  -7   -0.25    0.26
 -14   2   7   -0.01    0.26
  14   2  -7   -0.37    0.27
  13  -2  -7    0.42    0.28
 -13  -2   7    0.10    0.24
  13   2  -7    0.37    0.29
 -13   2   7   -0.48    0.22
  12  -2  -7    0.06    0.24
 -12  -2   7    0.11    0.22
 -12   2   7    0.29    0.23
  12   2  -7   -0.06    0.23
 -11  -2   7    0.03    0.19
  11  -2  -7   -0.01    0.20
  11   2  -7   -0.05    0.23
 -11   2   7    0.02    0.21
  10  -2  -7    0.68    0.23
 -10  -2   7    1.02    0.23
  10   2  -7    0.78    0.26
 -10   2   7    1.08    0.25
  -9  -2   7    1.77    0.26
   9  -2  -7    1.31    0.27
  -9   2   7    1.32    0.25
   9   2  -7    1.37    0.28
   8  -2  -7    5.63    0.43
  -8  -2   7    5.97    0.39
  -8  -2   7    6.20    0.25
  -8   2   7    5.21    0.38
   8   2  -7    5.88    0.43
   7  -2  -7    7.13    0.41
  -7  -2   7    7.25    0.29
  -7  -2   7    7.18    0.38
  -7   2   7    6.41    0.39
   7   2  -7    6.62    0.42
  -6  -2   7    1.94    0.17
  -6  -2   7    2.26    0.23
   6  -2  -7    2.34    0.24
  -6   2   7    1.84    0.23
   6   2  -7    1.91    0.24
   5  -2  -7   50.86    1.39
  -5  -2   7   52.37    1.40
  -5  -2   7   50.22    1.34
  -5   2   7   49.76    1.40
   5   2  -7   51.22    1.40
   4  -2  -7   25.78    0.76
  -4  -2   7   23.81    0.74
  -4  -2   7   24.30    0.72
  -4   2   7   24.49    0.76
   4   2  -7   24.52    0.76
  -3  -2   7    0.18    0.10
   3  -2  -7   -0.06    0.09
  -3  -2   7    0.12    0.10
   3   2  -7    0.10    0.10
  -3   2   7    0.10    0.11
   2  -2  -7    1.76    0.17
  -2  -2   7    1.68    0.16
   2   2  -7    1.66    0.16
  -2   2   7    2.20    0.19
  -1  -2   7    0.23    0.10
   1  -2  -7    0.29    0.11
  -1  -2   7    0.19    0.09
  -1   2   7    0.31    0.10
   1   2  -7    0.08    0.09
   0  -2   7    1.72    0.16
   0  -2   7    2.00    0.16
   0  -2  -7    1.55    0.15
   0   2   7    1.77    0.17
   0   2  -7    1.51    0.15
   1  -2   7    0.55    0.11
  -1  -2  -7    0.51    0.12
   1  -2   7    0.56    0.12
   1   2   7    0.68    0.13
  -1   2  -7    0.59    0.12
   2  -2   7    1.63    0.14
  -2  -2  -7    1.57    0.16
   2  -2   7    1.41    0.15
  -2   2  -7    1.55    0.16
   2   2   7    1.76    0.18
  -3  -2  -7    0.12    0.11
   3  -2   7    0.18    0.11
  -3   2  -7    0.29    0.12
   3   2   7    0.24    0.12
   4  -2   7    0.18    0.12
  -4  -2  -7    0.05    0.11
  -4   2  -7    0.13    0.11
   4   2   7    0.10    0.12
   5  -2   7    0.13    0.14
  -5  -2  -7    0.01    0.12
  -5   2  -7    0.03    0.11
   5   2   7    0.23    0.14
   6  -2   7    2.10    0.24
  -6  -2  -7    2.34    0.24
  -6   2  -7    2.69    0.27
   6   2   7    2.45    0.26
   7  -2   7    6.67    0.42
  -7  -2  -7    5.88    0.37
  -7   2  -7    5.71    0.38
   7   2   7    6.59    0.43
   8  -2   7    3.71    0.36
  -8  -2  -7    4.35    0.34
  -8   2  -7    3.81    0.36
   8   2   7    3.89    0.38
   9  -2   7    0.41    0.21
  -9  -2  -7    0.04    0.17
   9   2   7    0.54    0.23
  -9   2  -7    0.25    0.19
  10  -2   7    0.81    0.26
 -10  -2  -7    0.57    0.23
 -10   2  -7    0.63    0.24
  10   2   7    0.26    0.23
 -11  -2  -7   -0.14    0.19
  11  -2   7   -0.02    0.20
 -11   2  -7    0.30    0.25
  11   2   7   -0.01    0.24
 -12  -2  -7    0.19    0.23
  12  -2   7    0.08    0.24
 -12   2  -7   -0.05    0.21
  12   2   7    0.08    0.25
 -13  -2  -7   -0.37    0.19
  13  -2   7   -0.02    0.26
 -13   2  -7    0.16    0.26
  13   2   7    0.06    0.27
  13  -3  -7    0.01    0.27
  13   3  -7    0.40    0.27
 -13   3   7    0.18    0.26
  12  -3  -7    0.37    0.26
 -12  -3   7    0.08    0.20
  12   3  -7    0.31    0.24
 -12   3   7    0.00    0.23
 -11  -3   7    0.83    0.24
  11  -3  -7    0.66    0.26
 -11   3   7    0.52    0.24
  11   3  -7    0.44    0.26
  10  -3  -7    0.76    0.24
 -10  -3   7    0.26    0.19
 -10   3   7    0.38    0.22
  10   3  -7    0.44    0.22
  -9  -3   7   -0.19    0.15
   9  -3  -7    0.01    0.20
   9   3  -7    0.16    0.21
  -9   3   7   -0.02    0.16
   8  -3  -7    0.39    0.20
  -8  -3   7    0.07    0.16
  -8  -3   7    0.06    0.10
  -8   3   7    0.05    0.16
   8   3  -7   -0.05    0.19
  -7  -3   7    0.65    0.13
  -7  -3   7    0.60    0.18
   7  -3  -7    0.79    0.21
  -7   3   7    0.66    0.09
  -7   3   7    0.50    0.18
   7   3  -7    0.67    0.19
  -6  -3   7   16.69    0.56
   6  -3  -7   17.27    0.62
  -6  -3   7   17.34    0.62
  -6   3   7   17.29    0.64
   6   3  -7   17.22    0.64
   5  -3  -7    6.20    0.33
  -5  -3   7    6.74    0.33
  -5  -3   7    6.48    0.31
   5   3  -7    5.93    0.34
  -5   3   7    6.79    0.35
  -4  -3   7   37.51    1.04
  -4  -3   7   37.62    1.05
   4  -3  -7   38.52    1.06
  -4   3   7   38.57    1.08
   4   3  -7   35.93    1.05
   3  -3  -7    9.12    0.36
  -3  -3   7    9.28    0.35
  -3  -3   7    8.84    0.37
  -3   3   7    8.30    0.36
   3   3  -7    9.15    0.37
   2  -3  -7   23.91    0.69
  -2  -3   7   22.97    0.69
  -2  -3   7   23.78    0.68
   2   3  -7   24.16    0.69
  -2   3   7   22.94    0.70
  -1  -3   7    1.84    0.18
   1  -3  -7    1.76    0.16
  -1  -3   7    1.79    0.15
   1   3  -7    1.52    0.15
  -1   3   7    1.76    0.17
  -1   3   7    1.54    0.16
   0  -3   7   73.34    1.87
   0  -3  -7   75.27    1.87
   0  -3   7   76.60    1.87
   0   3  -7   74.48    1.88
   0   3   7   76.67    1.89
  -1  -3  -7   23.39    0.69
   1  -3   7   24.01    0.69
   1  -3   7   24.13    0.70
   1   3   7   24.69    0.71
   1   3   7   24.44    0.59
  -1   3  -7   24.91    0.70
  -2  -3  -7    0.76    0.12
  -2  -3  -7    0.74    0.06
   2  -3   7    0.73    0.13
   2  -3   7    0.64    0.12
   2   3   7    0.61    0.13
  -2   3  -7    0.88    0.14
  -3  -3  -7    2.63    0.13
  -3  -3  -7    2.41    0.20
   3  -3   7    2.24    0.20
   3   3   7    2.50    0.22
  -3   3  -7    2.79    0.21
   4  -3   7    0.51    0.14
  -4  -3  -7    0.51    0.13
   4   3   7    0.53    0.14
  -4   3  -7    0.39    0.13
   5  -3   7    0.20    0.13
  -5  -3  -7    0.06    0.12
   5   3   7    0.41    0.16
  -5   3  -7    0.24    0.14
   6  -3   7    4.50    0.32
  -6  -3  -7    4.35    0.32
   6   3   7    4.66    0.35
  -6   3  -7    4.57    0.32
   7  -3   7    5.14    0.38
  -7  -3  -7    5.28    0.36
   7   3   7    5.00    0.39
  -7   3  -7    4.79    0.38
   8  -3   7    3.29    0.33
  -8  -3  -7    3.76    0.34
  -8   3  -7    3.90    0.37
   8   3   7    3.22    0.34
  -9  -3  -7    1.17    0.25
   9  -3   7    1.10    0.24
   9   3   7    1.01    0.27
  -9   3  -7    1.32    0.28
  10  -3   7    0.34    0.23
 -10  -3  -7    0.24    0.21
  10   3   7    0.62    0.24
 -10   3  -7    0.41    0.22
  11  -3   7    0.35    0.24
 -11  -3  -7   -0.27    0.18
  11   3   7    0.23    0.25
 -11   3  -7   -0.25    0.21
 -12  -3  -7   -0.08    0.21
  12  -3   7   -0.08    0.24
  12   3   7    0.20    0.25
 -12   3  -7    0.32    0.26
  13  -3   7   -0.11    0.26
 -13   3  -7   -0.10    0.24
  13   3   7    0.35    0.27
 -13   4   7   -0.21    0.23
  13   4  -7    0.03    0.24
  12  -4  -7   -0.43    0.21
  12   4  -7    0.04    0.24
 -12   4   7    0.04    0.24
 -11  -4   7    0.10    0.16
  11  -4  -7    0.37    0.23
  11   4  -7    0.01    0.23
 -11   4   7    0.04    0.21
  10  -4  -7    0.75    0.25
 -10  -4   7    0.99    0.23
 -10   4   7    0.63    0.24
  10   4  -7    1.05    0.28
  -9  -4   7    1.00    0.21
   9  -4  -7    0.89    0.24
  -9   4   7    0.92    0.23
   9   4  -7    0.52    0.23
  -8  -4   7    1.73    0.20
  -8  -4   7    1.95    0.25
   8  -4  -7    1.77    0.26
   8   4  -7    1.62    0.27
  -8   4   7    1.53    0.25
  -7  -4   7    0.56    0.18
  -7  -4   7    0.63    0.15
   7  -4  -7    0.63    0.20
   7   4  -7    0.79    0.22
  -7   4   7    0.84    0.11
  -7   4   7    0.75    0.21
   6  -4  -7    3.13    0.28
  -6  -4   7    3.20    0.24
  -6  -4   7    3.10    0.25
  -6   4   7    3.04    0.21
  -6   4   7    2.97    0.28
   6   4  -7    2.97    0.28
   5  -4  -7    4.90    0.31
  -5  -4   7    5.29    0.29
  -5  -4   7    4.41    0.28
  -5   4   7    4.98    0.31
   5   4  -7    4.89    0.32
  -4  -4   7    8.55    0.35
   4  -4  -7    8.86    0.37
  -4  -4   7    8.68    0.36
  -4  -4   7    8.83    0.39
   4   4  -7    9.16    0.38
  -4   4   7    8.61    0.39
  -3  -4   7    3.11    0.25
  -3  -4   7    2.51    0.23
  -3  -4   7    2.89    0.19
   3  -4  -7    2.56    0.20
  -3   4   7    2.95    0.22
   3   4  -7    2.74    0.22
   2  -4  -7    9.21    0.35
  -2  -4   7    8.92    0.39
  -2  -4   7    9.04    0.33
  -2  -4   7    8.95    0.37
   2   4  -7    8.90    0.35
  -2   4   7    8.30    0.35
   1  -4  -7   22.74    0.66
  -1  -4   7   23.43    0.74
  -1  -4   7   22.59    0.70
  -1  -4   7   22.92    0.64
   1   4  -7   22.59    0.67
   1   4  -7   22.90    0.66
  -1   4   7   23.21    0.68
  -1   4   7   23.81    0.68
   0  -4   7   13.18    0.41
   0  -4  -7   12.32    0.41
   0  -4   7   12.61    0.45
   0   4   7   12.52    0.43
   0   4  -7   12.42    0.42
   0   4  -7   13.29    0.43
  -1  -4  -7    0.76    0.12
   1  -4   7    0.38    0.12
   1  -4   7    0.88    0.12
  -1   4  -7    0.80    0.13
   1   4   7    0.67    0.13
   2  -4   7    0.37    0.11
  -2  -4  -7    0.49    0.11
  -2  -4  -7    0.46    0.08
   2  -4   7    0.60    0.13
   2   4   7    0.45    0.13
  -2   4  -7    0.29    0.11
  -3  -4  -7   13.47    0.47
  -3  -4  -7   13.84    0.40
   3  -4   7   13.68    0.47
   3   4   7   14.17    0.51
  -3   4  -7   13.97    0.49
  -4  -4  -7    3.14    0.24
   4  -4   7    3.93    0.28
  -4  -4  -7    3.86    0.19
   4   4   7    3.46    0.27
  -4   4  -7    3.79    0.25
   5  -4   7    0.12    0.13
  -5  -4  -7    0.17    0.13
  -5   4  -7    0.07    0.13
   5   4   7    0.26    0.14
  -6  -4  -7    0.26    0.15
   6  -4   7    0.06    0.15
  -6   4  -7    0.25    0.15
   6   4   7    0.44    0.17
  -7  -4  -7    2.75    0.28
   7  -4   7    2.88    0.29
   7   4   7    2.86    0.32
  -7   4  -7    3.73    0.33
  -8  -4  -7    2.23    0.27
   8  -4   7    2.17    0.24
   8  -4   7    2.04    0.27
  -8   4  -7    1.76    0.27
   8   4   7    1.52    0.26
   9  -4   7    0.28    0.16
   9  -4   7    0.34    0.21
  -9  -4  -7    0.16    0.19
  -9   4  -7    0.30    0.20
   9   4   7    0.13    0.22
 -10  -4  -7    2.93    0.33
  10  -4   7    2.76    0.36
 -10   4  -7    2.55    0.36
  10   4   7    2.40    0.35
 -11  -4  -7    0.40    0.22
  11  -4   7    0.00    0.21
 -11   4  -7    0.44    0.25
  11   4   7    0.45    0.24
  12  -4   7   -0.28    0.20
 -12   4  -7    0.22    0.25
  12   4   7    0.21    0.26
  13   4   7   -0.35    0.25
 -13   4  -7    0.18    0.26
  13   5  -7    0.34    0.30
 -13   5   7    0.23    0.26
 -12   5   7    1.19    0.31
  12   5  -7    1.70    0.36
  11  -5  -7    0.49    0.23
 -11   5   7    0.19    0.23
  11   5  -7    0.08    0.23
  10  -5  -7    0.18    0.18
  10   5  -7   -0.07    0.19
 -10   5   7    0.15    0.20
   9  -5  -7   -0.32    0.16
  -9  -5   7    0.02    0.15
  -9   5   7   -0.31    0.16
   9   5  -7   -0.11    0.19
  -8  -5   7    0.15    0.14
   8  -5  -7    0.15    0.18
  -8  -5   7   -0.04    0.12
   8   5  -7    0.00    0.17
  -8   5   7    0.10    0.18
  -7  -5   7    3.80    0.29
   7  -5  -7    4.41    0.36
  -7  -5   7    4.36    0.31
  -7   5   7    4.69    0.34
   7   5  -7    4.42    0.37
  -7   5   7    4.63    0.26
  -6  -5   7    2.04    0.22
  -6  -5   7    2.26    0.23
   6  -5  -7    2.39    0.25
   6   5  -7    2.07    0.25
  -6   5   7    2.10    0.26
  -6   5   7    2.51    0.20
   5  -5  -7    0.13    0.13
  -5  -5   7    0.01    0.11
  -5  -5   7    0.17    0.13
  -5  -5   7   -0.09    0.11
  -5   5   7    0.30    0.15
   5   5  -7    0.19    0.14
  -5   5   7    0.18    0.11
  -4  -5   7    1.19    0.20
  -4  -5   7    1.14    0.14
   4  -5  -7    1.17    0.16
  -4  -5   7    1.53    0.20
   4   5  -7    1.56    0.18
  -4   5   7    1.28    0.19
  -3  -5   7    0.00    0.12
   3  -5  -7    0.20    0.10
  -3  -5   7   -0.09    0.07
  -3  -5   7    0.08    0.13
   3   5  -7   -0.17    0.09
  -3   5   7    0.16    0.11
  -2  -5   7   11.43    0.46
  -2  -5   7   10.92    0.36
   2  -5  -7   10.80    0.38
  -2  -5   7   10.75    0.44
  -2   5   7   10.90    0.41
   2   5  -7   10.61    0.39
   2   5  -7   10.81    0.39
  -1  -5   7   -0.01    0.12
  -1  -5   7    0.04    0.12
   1  -5  -7    0.26    0.09
  -1  -5   7    0.01    0.04
  -1   5   7    0.13    0.10
   1   5  -7    0.05    0.09
   1   5  -7    0.06    0.08
  -1   5   7   -0.15    0.09
   0  -5  -7    0.70    0.11
   0  -5   7    0.71    0.15
   0  -5   7    0.61    0.16
   0   5  -7    0.59    0.12
   0   5  -7    0.79    0.12
   0   5   7    0.49    0.12
   1  -5   7    0.03    0.07
  -1  -5  -7   -0.07    0.07
   1  -5   7   -0.07    0.12
   1  -5   7    0.07    0.12
   1   5   7   -0.02    0.09
  -1   5  -7   -0.02    0.10
  -1   5  -7   -0.01    0.08
  -2  -5  -7    1.19    0.13
   2  -5   7    1.19    0.19
   2  -5   7    1.21    0.14
  -2  -5  -7    1.30    0.12
   2  -5   7    1.25    0.18
   2   5   7    1.22    0.16
  -2   5  -7    1.15    0.15
  -3  -5  -7    1.71    0.14
   3  -5   7    1.58    0.21
   3  -5   7    1.81    0.17
  -3  -5  -7    1.91    0.17
  -3   5  -7    1.71    0.18
   3   5   7    1.40    0.18
  -4  -5  -7    6.83    0.33
   4  -5   7    7.15    0.37
   4  -5   7    6.65    0.33
  -4  -5  -7    6.49    0.27
   4   5   7    6.90    0.35
  -4   5  -7    6.84    0.35
   5  -5   7    2.28    0.22
   5  -5   7    1.74    0.22
  -5  -5  -7    2.60    0.23
  -5  -5  -7    2.11    0.18
   5   5   7    1.58    0.22
  -5   5  -7    2.00    0.23
   6  -5   7    1.61    0.21
   6  -5   7    1.35    0.21
  -6  -5  -7    1.26    0.20
   6   5   7    1.31    0.22
  -6   5  -7    1.09    0.20
   7  -5   7    2.54    0.27
   7  -5   7    2.85    0.28
  -7  -5  -7    2.46    0.26
  -7   5  -7    2.36    0.29
   7   5   7    2.40    0.29
  -8  -5  -7    1.21    0.22
   8  -5   7    1.76    0.23
   8  -5   7    1.32    0.23
   8   5   7    1.13    0.24
  -8   5  -7    1.37    0.26
   9  -5   7    0.38    0.20
  -9  -5  -7    0.72    0.20
   9  -5   7    0.14    0.17
   9   5   7    0.43    0.23
  -9   5  -7    0.28    0.20
  10  -5   7    0.73    0.24
 -10   5  -7    0.36    0.22
  10   5   7    0.78    0.27
 -11   5  -7    0.01    0.22
  11   5   7   -0.09    0.23
  12   5   7   -0.23    0.24
 -12   5  -7   -0.36    0.21
  13   5   7    0.01    0.26
 -13   5  -7    0.34    0.28
  13   6  -7    0.57    0.31
 -13   6   7    0.24    0.28
  12   6  -7    0.63    0.29
 -12   6   7    0.64    0.29
 -11   6   7    0.72    0.27
  11   6  -7    0.60    0.26
 -10   6   7   -0.36    0.17
  10   6  -7    0.05    0.21
   9  -6  -7    1.48    0.25
   9   6  -7    0.89    0.25
  -9   6   7    1.26    0.25
   8  -6  -7    4.66    0.36
  -8  -6   7    3.86    0.29
  -8   6   7    3.90    0.37
   8   6  -7    3.87    0.36
  -7  -6   7   -0.08    0.14
   7  -6  -7    0.21    0.16
  -7  -6   7    0.62    0.16
   7   6  -7    0.46    0.20
  -7   6   7    0.07    0.17
  -6  -6   7    4.46    0.32
  -6  -6   7    5.02    0.28
   6  -6  -7    4.95    0.32
  -6  -6   7    5.00    0.29
   6   6  -7    4.53    0.34
  -6   6   7    5.58    0.36
  -5  -6   7    3.74    0.25
   5  -6  -7    3.62    0.27
  -5  -6   7    3.65    0.28
  -5  -6   7    4.00    0.32
  -5   6   7    4.09    0.30
   5   6  -7    3.76    0.30
  -4  -6   7    1.89    0.23
   4  -6  -7    2.08    0.19
  -4  -6   7    1.54    0.23
  -4  -6   7    2.28    0.18
  -4   6   7    1.77    0.21
   4   6  -7    2.20    0.21
  -3  -6   7    0.06    0.13
  -3  -6   7    0.01    0.04
  -3  -6   7    0.27    0.14
   3  -6  -7   -0.04    0.09
   3   6  -7    0.10    0.11
  -3   6   7    0.26    0.12
   2  -6  -7    1.48    0.14
  -2  -6   7    1.78    0.14
  -2  -6   7    1.52    0.21
  -2  -6   7    1.55    0.21
  -2   6   7    1.35    0.17
   2   6  -7    1.56    0.16
   2   6  -7    1.46    0.16
  -1  -6   7    1.35    0.10
  -1  -6   7    0.97    0.19
  -1  -6   7    1.02    0.18
  -1   6   7    0.97    0.14
   1   6  -7    1.33    0.15
   1   6  -7    1.18    0.13
  -1   6   7    1.15    0.15
  -1   6   7    1.25    0.16
   0  -6   7    6.57    0.35
   0  -6   7    6.72    0.22
   0  -6   7    7.26    0.38
   0   6  -7    6.42    0.29
   0   6   7    6.42    0.30
   0   6   7    6.64    0.30
   0   6  -7    6.55    0.28
   1  -6   7    5.14    0.20
   1  -6   7    5.02    0.30
   1  -6   7    5.03    0.33
  -1  -6  -7    4.94    0.23
  -1   6  -7    4.81    0.26
   1   6   7    5.37    0.27
  -1   6  -7    4.64    0.25
   1   6   7    4.79    0.27
   2  -6   7    1.11    0.20
  -2  -6  -7    1.59    0.15
  -2  -6  -7    1.14    0.12
   2  -6   7    1.51    0.21
   2   6   7    1.29    0.16
  -2   6  -7    1.26    0.16
  -2   6  -7    1.47    0.16
   3  -6   7   26.76    0.76
  -3  -6  -7   27.43    0.76
   3  -6   7   26.87    0.89
  -3  -6  -7   26.79    0.75
  -3   6  -7   27.19    0.81
   3   6   7   28.16    0.83
  -4  -6  -7    0.03    0.10
  -4  -6  -7   -0.03    0.10
   4  -6   7    0.14    0.16
   4  -6   7    0.02    0.10
   4   6   7   -0.13    0.12
  -4   6  -7   -0.04    0.13
   5  -6   7    5.63    0.38
   5  -6   7    5.70    0.32
  -5  -6  -7    5.56    0.31
  -5  -6  -7    5.78    0.28
   5   6   7    5.87    0.36
  -5   6  -7    5.75    0.35
  -6  -6  -7    0.17    0.13
   6  -6   7   -0.06    0.13
   6  -6   7   -0.01    0.16
  -6  -6  -7    0.01    0.11
   6   6   7    0.01    0.14
  -6   6  -7    0.16    0.16
  -7  -6  -7    1.06    0.19
   7  -6   7    1.12    0.21
   7  -6   7    1.11    0.22
  -7  -6  -7    1.64    0.20
   7   6   7    1.12    0.24
  -7   6  -7    0.85    0.22
  -8  -6  -7    4.79    0.33
   8  -6   7    4.98    0.35
   8  -6   7    4.06    0.35
  -8   6  -7    5.31    0.41
   8   6   7    5.03    0.43
   9  -6   7    0.54    0.18
  -9   6  -7    0.78    0.24
   9   6   7    0.52    0.21
 -10   6  -7    0.59    0.25
  10   6   7    0.49    0.23
 -11   6  -7   -0.04    0.23
  11   6   7    0.15    0.23
 -12   6  -7    0.17    0.27
  12   6   7   -0.06    0.25
 -12   7   7    1.28    0.33
  12   7  -7    1.20    0.33
  11   7  -7    0.94    0.30
 -11   7   7    0.87    0.30
  10   7  -7    0.10    0.23
 -10   7   7   -0.14    0.20
   9   7  -7    1.87    0.29
  -9   7   7    1.24    0.28
  -8  -7   7    1.70    0.24
   8   7  -7    2.45    0.31
  -8   7   7    1.81    0.28
  -7  -7   7    1.89    0.29
  -7  -7   7    1.83    0.26
   7   7  -7    1.93    0.26
  -7   7   7    1.74    0.27
   6  -7  -7    0.59    0.16
  -6  -7   7    0.98    0.20
  -6  -7   7    1.45    0.25
   6   7  -7    0.82    0.21
  -6   7   7    0.71    0.20
  -5  -7   7    0.36    0.17
  -5  -7   7    0.38    0.19
   5  -7  -7    0.57    0.14
   5   7  -7    0.49    0.17
  -5   7   7    0.29    0.16
   4  -7  -7    7.15    0.32
  -4  -7   7    7.37    0.42
  -4  -7   7    7.41    0.27
  -4  -7   7    7.02    0.41
   4   7  -7    7.59    0.36
  -4   7   7    7.25    0.36
  -3  -7   7    0.65    0.18
  -3  -7   7    0.80    0.19
   3   7  -7    0.86    0.14
   3   7  -7    0.70    0.14
  -3   7   7    0.74    0.15
  -2  -7   7    0.11    0.15
  -2  -7   7    0.06    0.15
   2  -7  -7   -0.04    0.07
  -2   7   7    0.01    0.11
   2   7  -7   -0.06    0.10
  -2   7   7    0.07    0.11
   2   7  -7    0.13    0.10
  -1  -7   7    2.37    0.26
   1  -7  -7    2.89    0.15
  -1  -7   7    3.28    0.31
  -1   7   7    3.31    0.22
  -1   7   7    3.15    0.22
   1   7  -7    2.99    0.20
  -1   7   7    3.67    0.24
   1   7  -7    2.87    0.20
   0  -7  -7    1.72    0.12
   0  -7   7    1.39    0.21
   0  -7   7    1.63    0.23
   0   7   7    1.43    0.16
   0   7  -7    1.84    0.17
   0   7   7    1.57    0.17
   0   7  -7    2.00    0.16
  -1  -7  -7    3.86    0.23
   1  -7   7    4.08    0.33
  -1  -7  -7    3.95    0.17
   1  -7   7    3.73    0.29
   1   7   7    4.09    0.25
  -1   7  -7    3.83    0.25
   1   7   7    4.28    0.25
  -1   7  -7    4.12    0.23
  -2  -7  -7   10.86    0.39
   2  -7   7   10.39    0.50
   2  -7   7    9.93    0.48
  -2  -7  -7   10.66    0.33
  -2   7  -7   11.03    0.41
   2   7   7   10.28    0.41
  -2   7  -7    9.69    0.39
   2   7   7   10.18    0.41
   3  -7   7   18.13    0.68
   3  -7   7   18.00    0.52
  -3  -7  -7   17.97    0.57
   3  -7   7   18.63    0.70
   3   7   7   18.63    0.62
  -3   7  -7   18.04    0.60
  -4  -7  -7    1.27    0.14
   4  -7   7    0.83    0.21
  -4  -7  -7    1.11    0.16
   4  -7   7    0.96    0.14
  -4   7  -7    0.92    0.17
   4   7   7    0.80    0.18
  -5  -7  -7   -0.04    0.12
   5  -7   7    0.03    0.16
  -5  -7  -7   -0.03    0.10
   5  -7   7   -0.03    0.11
   5   7   7    0.05    0.15
  -5   7  -7   -0.07    0.13
  -6  -7  -7    0.38    0.14
   6  -7   7    0.75    0.20
  -6   7  -7    0.56    0.19
   6   7   7    0.49    0.19
   7  -7   7    1.77    0.26
  -7  -7  -7    1.81    0.22
   7   7   7    1.68    0.26
  -7   7  -7    2.22    0.28
   8  -7   7    1.26    0.23
  -8  -7  -7    1.18    0.20
   8   7   7    1.70    0.29
  -8   7  -7    1.55    0.27
   9  -7   7    0.52    0.19
  -9  -7  -7    0.17    0.16
  -9   7  -7    0.41    0.23
   9   7   7    0.16    0.22
 -10  -7  -7    0.28    0.17
 -10   7  -7    0.30    0.23
  10   7   7    0.20    0.22
  11   7   7   -0.19    0.21
 -11   7  -7   -0.06    0.21
 -12   7  -7    0.58    0.29
  12   7   7    0.19    0.26
  12   8  -7    1.45    0.35
 -12   8   7    0.71    0.30
 -11  -8   7    0.10    0.27
  11   8  -7    0.19    0.25
 -11   8   7    0.02    0.23
 -10  -8   7    0.35    0.27
 -10   8   7    0.57    0.26
  10   8  -7    0.64    0.27
  -9  -8   7    1.25    0.29
  -9   8   7    1.55    0.30
   9   8  -7    1.27    0.28
  -8  -8   7    1.26    0.28
   8   8  -7    1.44    0.28
  -8   8   7    1.39    0.26
  -7  -8   7    5.19    0.45
  -7  -8   7    4.56    0.36
  -7   8   7    5.17    0.38
   7   8  -7    4.59    0.36
  -6  -8   7    2.92    0.33
  -6  -8   7    2.76    0.30
  -6   8   7    2.40    0.28
   6   8  -7    2.61    0.28
  -5  -8   7    0.85    0.24
  -5  -8   7    0.44    0.19
  -5   8   7    0.65    0.18
   5   8  -7    0.62    0.18
  -4  -8   7    0.40    0.18
  -4  -8   7    0.57    0.21
   4   8  -7    0.48    0.15
  -4   8   7    0.53    0.16
  -3  -8   7   -0.03    0.16
  -3  -8   7   -0.09    0.14
   3   8  -7    0.04    0.11
   3   8  -7   -0.23    0.11
  -3   8   7    0.02    0.12
  -2  -8   7    0.36    0.19
  -2  -8   7    0.12    0.17
  -2   8   7    0.19    0.11
  -2   8   7    0.21    0.13
   2   8  -7    0.19    0.11
   2   8  -7    0.32    0.11
  -1  -8   7   -0.03    0.15
  -1  -8   7   -0.03    0.15
   1   8  -7    0.02    0.10
  -1   8   7    0.16    0.10
  -1   8   7    0.11    0.10
   1   8  -7   -0.01    0.08
  -1   8   7   -0.05    0.11
   0  -8   7   -0.16    0.16
   0  -8   7   -0.18    0.14
   0   8   7   -0.13    0.09
   0   8  -7   -0.06    0.08
   0   8  -7   -0.01    0.10
   0   8   7    0.01    0.10
   1  -8   7    4.51    0.34
  -1  -8  -7    4.93    0.28
   1  -8   7    4.87    0.40
   1   8   7    4.98    0.28
  -1   8  -7    4.96    0.26
   1   8   7    4.60    0.26
  -1   8  -7    4.91    0.27
   2  -8   7    5.43    0.37
   2  -8   7    6.14    0.43
  -2  -8  -7    5.76    0.30
   2   8   7    6.03    0.31
  -2   8  -7    5.99    0.30
   2   8   7    5.56    0.30
  -2   8  -7    5.57    0.30
   3  -8   7    0.61    0.21
  -3  -8  -7    0.23    0.13
   3  -8   7    0.38    0.19
  -3   8  -7    0.36    0.14
   3   8   7    0.40    0.15
   4  -8   7    9.25    0.52
  -4  -8  -7    9.50    0.39
   4   8   7    9.76    0.44
  -4   8  -7    9.79    0.43
  -5  -8  -7    0.00    0.13
   5  -8   7   -0.11    0.16
  -5   8  -7   -0.05    0.15
   5   8   7    0.01    0.14
   6  -8   7    1.13    0.23
  -6  -8  -7    1.61    0.21
   6   8   7    0.99    0.22
  -6   8  -7    0.63    0.21
   7  -8   7    0.78    0.22
  -7  -8  -7    0.98    0.20
   7   8   7    0.72    0.21
  -7   8  -7    0.86    0.23
  -8  -8  -7   -0.01    0.14
   8  -8   7   -0.13    0.16
   8   8   7    0.00    0.18
  -8   8  -7    0.06    0.19
   9  -8   7   -0.03    0.17
  -9  -8  -7    0.09    0.16
  -9   8  -7   -0.06    0.20
   9   8   7   -0.06    0.20
 -10  -8  -7    0.09    0.17
 -10   8  -7   -0.07    0.21
  10   8   7    0.20    0.23
  11   8   7   -0.23    0.24
 -11   8  -7    1.20    0.31
 -11  -9   7    0.06    0.25
  11   9  -7    1.04    0.30
 -11   9   7    0.99    0.31
 -10  -9   7    0.07    0.23
  10   9  -7    0.13    0.23
 -10   9   7    0.33    0.24
  -9  -9   7    0.13    0.23
  -9   9   7    0.26    0.23
   9   9  -7    0.21    0.22
  -8  -9   7    0.14    0.23
  -8   9   7   -0.02    0.19
   8   9  -7    0.33    0.22
  -7  -9   7    0.73    0.21
  -7  -9   7    0.47    0.24
   7   9  -7    0.50    0.21
  -7   9   7    0.24    0.19
  -6  -9   7    1.19    0.25
  -6  -9   7    1.68    0.29
   6   9  -7    1.48    0.23
  -6   9   7    1.40    0.24
  -5  -9   7    3.18    0.36
  -5  -9   7    2.95    0.33
   5   9  -7    3.27    0.28
  -5   9   7    3.42    0.30
  -4  -9   7   13.41    0.63
  -4  -9   7   12.73    0.62
   4   9  -7   14.23    0.52
  -4   9   7   14.38    0.55
  -3  -9   7    1.04    0.24
  -3  -9   7    1.18    0.25
   3   9  -7    1.30    0.17
  -3   9   7    1.25    0.19
  -2  -9   7    0.12    0.18
  -2  -9   7    0.18    0.18
  -2   9   7    0.52    0.14
   2   9  -7    0.58    0.14
  -1  -9   7    3.11    0.33
  -1  -9   7    3.25    0.33
  -1   9   7    3.58    0.25
   1   9  -7    3.71    0.24
   0  -9   7   -0.11    0.16
   0  -9   7   -0.28    0.15
   0   9  -7   -0.03    0.10
   0   9   7   -0.07    0.11
   0   9  -7    0.00    0.09
   1  -9   7   12.69    0.60
   1  -9   7   11.45    0.55
  -1  -9  -7   12.15    0.48
   1   9   7   11.68    0.45
  -1   9  -7   12.06    0.43
   2  -9   7    8.30    0.49
  -2  -9  -7    7.72    0.38
   2  -9   7    7.65    0.46
   2   9   7    8.74    0.38
  -2   9  -7    8.29    0.37
   3  -9   7    1.60    0.28
  -3  -9  -7    2.08    0.23
  -3   9  -7    1.45    0.19
   3   9   7    1.90    0.22
   4  -9   7    1.84    0.29
  -4  -9  -7    1.16    0.19
  -4   9  -7    1.34    0.21
   4   9   7    1.88    0.23
  -5  -9  -7   -0.07    0.13
   5  -9   7    0.61    0.22
  -5   9  -7    0.18    0.15
   5   9   7    0.14    0.16
   6  -9   7   -0.05    0.17
  -6  -9  -7    0.03    0.14
   6   9   7    0.24    0.18
  -6   9  -7   -0.24    0.15
   7  -9   7    0.52    0.21
  -7  -9  -7    0.25    0.16
  -7   9  -7    0.43    0.20
   7   9   7    0.14    0.19
   8  -9   7    1.10    0.25
  -8  -9  -7    1.68    0.24
   8   9   7    0.99    0.26
  -8   9  -7    1.27    0.27
   9  -9   7    0.92    0.25
  -9  -9  -7    0.97    0.21
   9   9   7    0.35    0.24
  -9   9  -7    0.30    0.24
 -10   9  -7   -0.13    0.22
  10   9   7    0.10    0.22
 -11   9  -7    0.65    0.28
  11   9   7    0.03    0.25
 -11  10   7    0.02    0.25
 -10 -10   7   -0.01    0.22
  10  10  -7   -0.40    0.20
 -10  10   7   -0.01    0.24
  -9 -10   7    0.14    0.23
  -9  10   7    0.03    0.21
   9  10  -7   -0.25    0.21
  -8 -10   7    2.22    0.35
  -8  10   7    3.08    0.35
   8  10  -7    2.57    0.33
  -7 -10   7    0.06    0.21
  -7 -10   7   -0.36    0.17
  -7  10   7    0.05    0.18
   7  10  -7    0.09    0.18
  -6 -10   7    1.57    0.32
  -6 -10   7    1.89    0.30
  -6  10   7    2.69    0.30
   6  10  -7    2.00    0.26
  -5 -10   7    0.69    0.24
  -5 -10   7    0.93    0.24
   5  10  -7    0.57    0.18
  -5  10   7    0.39    0.17
  -4 -10   7    1.41    0.27
  -4 -10   7    0.99    0.24
   4  10  -7    1.19    0.18
  -4  10   7    1.34    0.21
  -3 -10   7    0.13    0.20
  -3 -10   7    0.53    0.22
   3  10  -7    0.17    0.12
  -3  10   7    0.22    0.13
  -2 -10   7    1.19    0.27
  -2 -10   7    0.65    0.22
  -2  10   7    0.89    0.16
   2  10  -7    0.70    0.14
  -1 -10   7    0.87    0.23
  -1 -10   7    0.50    0.21
  -1  10   7    0.48    0.14
   1  10  -7    0.42    0.13
   0 -10   7    1.12    0.26
   0 -10   7    1.02    0.25
   0  10  -7    1.39    0.16
   0  10   7    1.60    0.18
   1 -10   7   -0.20    0.19
   1 -10   7    0.08    0.19
   1  10   7    0.08    0.12
  -1  10  -7    0.34    0.12
   2 -10   7    0.51    0.22
   2 -10   7    0.63    0.23
  -2 -10  -7    0.41    0.17
  -2  10  -7    0.52    0.14
   2  10   7    0.54    0.15
   3 -10   7    1.29    0.27
  -3 -10  -7    1.47    0.22
   3  10   7    1.63    0.20
  -3  10  -7    1.58    0.20
  -4 -10  -7    0.04    0.15
   4 -10   7    0.60    0.22
   4  10   7    0.20    0.15
  -4  10  -7    0.32    0.15
  -5 -10  -7    0.59    0.18
   5 -10   7    0.80    0.24
   5  10   7    0.43    0.17
  -5  10  -7    0.73    0.19
   6 -10   7    2.56    0.34
  -6 -10  -7    2.53    0.27
   6  10   7    2.30    0.29
  -6  10  -7    2.66    0.29
  -7 -10  -7    0.55    0.18
   7 -10   7    0.32    0.23
  -7  10  -7    0.37    0.21
   7  10   7    0.41    0.20
   8 -10   7    1.50    0.29
  -8 -10  -7    0.95    0.21
   8  10   7    1.12    0.27
  -8  10  -7    0.95    0.26
   9  10   7    0.79    0.27
  -9  10  -7    0.20    0.23
 -10  10  -7    0.13    0.26
  10  10   7    0.22    0.26
 -10 -11   7    0.17    0.25
  10  11  -7   -0.26    0.23
 -10  11   7   -0.01    0.24
  -9 -11   7   -0.10    0.25
   9  11  -7    0.31    0.24
  -9  11   7    0.15    0.24
  -8 -11   7    0.26    0.24
   8  11  -7    0.21    0.20
  -8  11   7    0.09    0.21
  -7 -11   7    0.07    0.22
  -7  11   7   -0.04    0.19
   7  11  -7    0.01    0.18
  -6 -11   7    1.08    0.27
  -6 -11   7    0.51    0.27
  -6  11   7    0.90    0.23
   6  11  -7    0.72    0.20
  -5 -11   7    0.19    0.21
  -5 -11   7    0.27    0.22
  -5  11   7    0.17    0.17
   5  11  -7    0.16    0.15
  -4 -11   7    0.07    0.21
  -4 -11   7    0.00    0.20
   4  11  -7    0.20    0.14
  -4  11   7    0.20    0.16
  -3 -11   7    0.10    0.22
  -3 -11   7    0.31    0.21
   3  11  -7    0.27    0.13
  -3  11   7    0.12    0.14
  -2 -11   7   -0.13    0.19
  -2 -11   7    0.26    0.20
   2  11  -7    0.19    0.11
  -2  11   7    0.35    0.14
  -2  11   7    0.17    0.14
  -1 -11   7    0.01    0.21
  -1 -11   7   -0.08    0.19
  -1  11   7    0.02    0.12
   1  11  -7    0.09    0.11
   0 -11   7    1.55    0.29
   0 -11   7    0.76    0.25
   0  11   7    1.30    0.18
   0  11  -7    1.58    0.17
   1 -11   7    3.63    0.38
   1 -11   7    3.79    0.40
   1  11   7    3.31    0.27
  -1  11  -7    3.24    0.25
  -2 -11  -7    0.85    0.21
   2 -11   7    0.84    0.25
   2 -11   7    1.08    0.27
   2  11   7    0.93    0.17
  -2  11  -7    0.85    0.16
   3 -11   7    0.35    0.23
  -3 -11  -7    0.59    0.19
  -3  11  -7    0.58    0.16
   3  11   7    0.28    0.15
   4 -11   7    0.35    0.22
  -4 -11  -7   -0.25    0.14
  -4  11  -7   -0.17    0.13
   4  11   7    0.08    0.14
  -5 -11  -7    1.18    0.22
   5 -11   7    1.25    0.28
  -5  11  -7    1.10    0.21
   5  11   7    1.37    0.23
  -6 -11  -7    0.37    0.17
   6 -11   7    0.39    0.23
  -6  11  -7   -0.06    0.18
   6  11   7    0.06    0.17
   7 -11   7    1.79    0.32
  -7 -11  -7    0.93    0.22
   7  11   7    0.68    0.23
  -7  11  -7    1.59    0.27
   8 -11   7    0.34    0.24
   8  11   7    0.37    0.24
  -8  11  -7    0.20    0.23
  -9  11  -7    0.23    0.24
   9  11   7    0.16    0.22
  -9 -12   7   -0.03    0.24
  -9  12   7    0.05    0.24
   9  12  -7   -0.16    0.21
  -8 -12   7   -0.08    0.24
  -8  12   7    0.02    0.22
   8  12  -7   -0.20    0.19
  -7 -12   7    0.08    0.25
   7  12  -7   -0.08    0.18
  -7  12   7    0.39    0.22
  -6 -12   7    3.01    0.40
  -6 -12   7    2.11    0.36
   6  12  -7    2.98    0.30
  -6  12   7    2.71    0.32
  -5 -12   7    0.23    0.23
  -5 -12   7   -0.07    0.20
  -5  12   7   -0.30    0.14
   5  12  -7    0.10    0.15
  -4 -12   7    0.23    0.22
  -4 -12   7   -0.08    0.21
   4  12  -7    0.12    0.14
  -4  12   7    0.30    0.16
  -3 -12   7    0.07    0.21
  -3 -12   7   -0.15    0.20
   3  12  -7    0.10    0.13
  -3  12   7    0.13    0.14
  -2 -12   7    0.64    0.25
  -2 -12   7    0.47    0.25
  -2  12   7    0.28    0.14
   2  12  -7    0.56    0.14
  -2  12   7    0.20    0.13
  -1 -12   7   -0.19    0.21
  -1 -12   7   -0.02    0.20
  -1  12   7    0.05    0.13
   1  12  -7    0.12    0.11
   0 -12   7    1.29    0.31
   0 -12   7    1.02    0.27
   0  12   7    1.07    0.17
   0  12  -7    0.86    0.15
   1 -12   7    2.87    0.39
   1 -12   7    2.46    0.37
  -1  12  -7    2.59    0.21
   1  12   7    2.35    0.22
   2 -12   7   -0.13    0.23
  -2 -12  -7    0.07    0.17
   2 -12   7   -0.40    0.19
   2  12   7   -0.01    0.13
  -2  12  -7   -0.22    0.12
  -3 -12  -7    3.89    0.35
   3 -12   7    4.20    0.45
  -3  12  -7    3.32    0.27
   3  12   7    4.17    0.31
   4 -12   7   -0.02    0.21
  -4 -12  -7   -0.01    0.16
  -4  12  -7   -0.14    0.14
   4  12   7    0.06    0.15
   5 -12   7   -0.37    0.20
  -5 -12  -7   -0.01    0.16
  -5  12  -7    0.02    0.16
   5  12   7   -0.10    0.16
  -6 -12  -7   -0.26    0.15
   6 -12   7    0.17    0.22
   6  12   7    0.10    0.18
  -6  12  -7   -0.11    0.18
   7 -12   7    0.48    0.27
  -7  12  -7    0.42    0.22
   7  12   7    0.25    0.22
   8 -12   7   -0.13    0.23
   8  12   7    0.35    0.23
  -8  12  -7    0.07    0.21
  -8 -13   7   -0.22    0.25
  -8  13   7    0.14    0.22
   8  13  -7    0.28    0.21
  -7 -13   7   -0.17    0.23
  -7  13   7   -0.26    0.19
   7  13  -7    0.08    0.20
  -6 -13   7   -0.20    0.22
  -6  13   7   -0.21    0.18
   6  13  -7    0.07    0.17
  -5 -13   7   -0.12    0.21
  -5 -13   7    0.17    0.24
  -5  13   7    0.32    0.20
   5  13  -7   -0.08    0.16
  -4 -13   7   -0.37    0.20
  -4 -13   7    0.08    0.24
   4  13  -7    0.02    0.14
  -4  13   7   -0.08    0.16
  -3 -13   7    0.41    0.25
  -3 -13   7   -0.02    0.23
  -3  13   7   -0.08    0.14
  -3  13   7    0.18    0.15
   3  13  -7   -0.18    0.11
  -2 -13   7    0.10    0.23
  -2 -13   7    0.39    0.25
   2  13  -7    0.01    0.11
  -2  13   7   -0.18    0.12
  -1 -13   7    0.60    0.28
  -1 -13   7    0.79    0.27
   1  13  -7    0.29    0.12
  -1  13   7    0.73    0.16
   0 -13   7    0.38    0.25
   0 -13   7    0.12    0.23
   0  13   7    0.13    0.13
   0  13  -7   -0.12    0.10
   1 -13   7    1.61    0.35
   1 -13   7    1.28    0.32
   1  13   7    1.94    0.21
  -1  13  -7    2.04    0.19
   2 -13   7    0.90    0.29
  -2 -13  -7    1.03    0.24
   2 -13   7    1.03    0.31
  -2  13  -7    0.98    0.17
   2  13   7    1.00    0.18
   3 -13   7    0.95    0.31
  -3 -13  -7    0.58    0.22
  -3  13  -7    0.77    0.17
   3  13   7    0.60    0.17
  -4 -13  -7    0.38    0.21
   4 -13   7    1.05    0.30
   4  13   7    0.75    0.19
  -4  13  -7    0.50    0.18
   5 -13   7    0.16    0.25
  -5 -13  -7   -0.09    0.17
  -5  13  -7   -0.13    0.17
   5  13   7    0.21    0.17
   6 -13   7    0.45    0.28
  -6  13  -7   -0.08    0.18
   6  13   7    0.08    0.18
   7 -13   7    0.73    0.30
   7  13   7    0.41    0.23
  -7  13  -7    0.53    0.23
  -6 -14   7    1.52    0.35
   6  14  -7    1.62    0.25
  -6  14   7    2.01    0.30
  -5 -14   7    0.87    0.32
  -5  14   7    0.37    0.19
   5  14  -7    0.07    0.17
  -4 -14   7    0.23    0.25
  -4 -14   7    0.21    0.24
   4  14  -7    0.39    0.15
  -4  14   7    0.19    0.18
  -3 -14   7    0.14    0.25
  -3 -14   7    0.35    0.28
   3  14  -7    0.02    0.12
  -3  14   7    0.04    0.15
  -3  14   7    0.05    0.15
  -2 -14   7    0.92    0.30
  -2 -14   7    0.71    0.29
   2  14  -7    1.10    0.16
  -2  14   7    0.67    0.17
  -1 -14   7    0.76    0.29
  -1 -14   7    0.21    0.27
  -1  14   7    0.47    0.15
   1  14  -7    0.35    0.13
   0 -14   7    0.03    0.24
   0 -14   7   -0.24    0.22
   0  14  -7   -0.10    0.11
   0  14   7    0.16    0.14
   1 -14   7   -0.05    0.25
   1 -14   7    0.62    0.29
   1  14   7    0.51    0.15
  -1  14  -7    0.20    0.12
   2 -14   7    0.77    0.30
  -2  14  -7    0.00    0.12
   2  14   7    0.28    0.14
   3 -14   7    0.17    0.28
  -3 -14  -7    0.20    0.20
   3  14   7    0.17    0.16
  -3  14  -7    0.16    0.15
   4 -14   7   -0.27    0.23
  -4 -14  -7   -0.29    0.19
  -4  14  -7   -0.03    0.15
   4  14   7   -0.22    0.14
   5 -14   7    0.85    0.32
   5  14   7    0.29    0.19
  -5  14  -7    0.60    0.21
   6 -14   7   -0.02    0.28
  -6  14  -7    0.10    0.20
   6  14   7   -0.19    0.19
  -4 -15   7   -0.15    0.25
  -4  15   7   -0.22    0.15
  -4  15   7    0.00    0.16
  -3 -15   7   -0.11    0.27
  -3 -15   7    0.51    0.29
  -3  15   7    0.15    0.15
  -2 -15   7   -0.48    0.23
  -2 -15   7    0.08    0.25
  -2  15   7   -0.09    0.13
  -1 -15   7    0.05    0.27
  -1 -15   7    0.58    0.31
  -1  15   7    0.33    0.15
   0 -15   7   -0.26    0.25
   0 -15   7   -0.01    0.26
   0  15   7    0.02    0.13
   1 -15   7   -0.14    0.28
   1 -15   7    0.55    0.30
   1  15   7    0.65    0.16
   2 -15   7    0.75    0.32
   2  15   7    0.18    0.16
   3 -15   7    1.55    0.40
  -3 -15  -7    1.31    0.30
   3  15   7    1.59    0.22
  -3  15  -7    1.45    0.22
   4 -15   7    0.79    0.33
   4  15   7    0.99    0.21
  -4  15  -7    0.67    0.20
 -14   0   8    1.13    0.34
 -13   0   8   -0.02    0.23
  13   0  -8   -0.06    0.24
  12   0  -8    0.89    0.28
 -12   0   8    0.30    0.24
  11   0  -8   -0.25    0.20
 -11   0   8   -0.01    0.19
  10   0  -8    0.77    0.26
 -10   0   8    1.55    0.29
  -9   0   8    0.26    0.18
   9   0  -8    0.07    0.20
  -8   0   8    2.66    0.30
   8   0  -8    3.28    0.34
  -7   0   8   -0.07    0.15
  -7   0   8   -0.01    0.07
   7   0  -8   -0.25    0.16
   6   0  -8    3.34    0.30
  -6   0   8    3.67    0.28
  -5   0   8    0.14    0.13
   5   0  -8    0.03    0.12
  -4   0   8   30.23    0.90
   4   0  -8   31.02    0.91
  -3   0   8   -0.05    0.11
   3   0  -8    0.08    0.11
   2   0  -8   85.05    2.11
  -2   0   8   82.82    2.11
   1   0  -8   -0.07    0.09
  -1   0   8   -0.16    0.10
   0   0   8   16.49    0.53
   0   0   8   16.37    0.45
   0   0  -8   16.24    0.52
  -1   0  -8    0.06    0.10
   1   0   8    0.04    0.10
   1   0   8    0.04    0.06
  -2   0  -8   73.35    1.85
   2   0   8   71.75    1.86
  -3   0  -8    0.09    0.11
   3   0   8   -0.08    0.10
  -4   0  -8   14.83    0.55
   4   0   8   15.11    0.55
  -5   0  -8   -0.16    0.11
   5   0   8    0.10    0.13
  -6   0  -8   13.07    0.54
   6   0   8   13.02    0.56
  -7   0  -8   -0.18    0.14
   7   0   8    0.21    0.18
  -8   0  -8    1.09    0.23
   8   0   8    0.59    0.21
  -9   0  -8   -0.13    0.17
   9   0   8    0.02    0.19
  10   0   8    6.01    0.47
 -10   0  -8    5.24    0.46
  11   0   8    0.16    0.24
 -11   0  -8    0.15    0.23
 -12   0  -8    0.31    0.24
  12   0   8    0.45    0.28
 -13   0  -8   -0.01    0.24
  13   0   8   -0.30    0.22
  13  -1  -8    0.36    0.25
 -13  -1   8   -0.31    0.22
 -13   1   8    0.09    0.25
  13   1  -8    0.05    0.28
  12  -1  -8   -0.29    0.21
 -12  -1   8    0.05    0.22
  12   1  -8    0.15    0.25
 -12   1   8    0.15    0.22
  11  -1  -8    0.08    0.22
 -11  -1   8   -0.19    0.19
  11   1  -8    0.18    0.24
 -11   1   8    0.09    0.22
  10  -1  -8    0.96    0.24
 -10  -1   8    0.70    0.22
  10   1  -8    0.58    0.25
 -10   1   8    0.90    0.26
  -9  -1   8    2.30    0.30
   9  -1  -8    3.14    0.34
   9   1  -8    2.88    0.34
  -9   1   8    2.53    0.32
  -8  -1   8    1.12    0.24
   8  -1  -8    1.39    0.27
  -8  -1   8    1.50    0.12
   8   1  -8    1.27    0.25
  -8   1   8    1.27    0.24
  -7  -1   8    1.56    0.14
   7  -1  -8    2.07    0.27
  -7  -1   8    1.68    0.24
  -7   1   8    1.61    0.23
   7   1  -8    1.15    0.22
  -6  -1   8    9.63    0.36
  -6  -1   8   10.78    0.46
   6  -1  -8   10.05    0.46
  -6   1   8    9.70    0.45
   6   1  -8   10.05    0.48
  -5  -1   8   17.06    0.60
   5  -1  -8   17.10    0.60
   5   1  -8   16.81    0.61
  -5   1   8   15.73    0.59
  -4  -1   8    4.84    0.29
   4  -1  -8    5.18    0.30
  -4   1   8    5.10    0.29
   4   1  -8    4.91    0.29
  -3  -1   8    0.06    0.10
   3  -1  -8    0.03    0.11
  -3  -1   8    0.00    0.10
  -3   1   8   -0.01    0.11
   3   1  -8    0.21    0.11
   2  -1  -8   -0.03    0.11
  -2  -1   8    0.08    0.10
   2   1  -8   -0.07    0.10
  -2   1   8   -0.02    0.10
  -2   1   8   -0.07    0.11
  -1  -1   8   28.33    0.77
   1  -1  -8   29.10    0.82
  -1  -1   8   29.00    0.81
  -1   1   8   28.10    0.82
   1   1  -8   29.80    0.82
   0  -1  -8    1.04    0.15
   0  -1   8    1.06    0.11
   0  -1   8    0.99    0.14
   0   1   8    0.93    0.14
   0   1  -8    1.17    0.15
  -1  -1  -8   34.02    0.93
   1  -1   8   33.84    0.94
   1  -1   8   33.27    0.86
  -1   1  -8   32.89    0.93
   1   1   8   33.60    0.94
  -2  -1  -8   76.87    1.78
   2  -1   8   74.88    1.93
  -2  -1  -8   75.12    1.92
   2   1   8   77.59    1.94
  -2   1  -8   74.78    1.93
   3  -1   8    1.01    0.16
  -3  -1  -8    0.72    0.14
  -3   1  -8    0.88    0.15
   3   1   8    0.68    0.15
   4  -1   8    4.17    0.28
  -4  -1  -8    4.27    0.30
   4   1   8    4.13    0.28
  -4   1  -8    4.29    0.29
   5  -1   8    4.94    0.32
  -5  -1  -8    5.73    0.34
   5   1   8    5.31    0.35
  -5   1  -8    4.54    0.31
  -6  -1  -8    1.31    0.20
   6  -1   8    1.12    0.20
  -6   1  -8    1.38    0.22
   6   1   8    1.05    0.21
  -7  -1  -8    2.94    0.29
   7  -1   8    3.31    0.33
  -7   1  -8    2.91    0.30
   7   1   8    3.14    0.32
  -8  -1  -8    3.04    0.33
   8  -1   8    3.01    0.34
  -8   1  -8    2.86    0.32
   8   1   8    2.61    0.32
   9  -1   8    4.47    0.41
  -9  -1  -8    4.38    0.40
   9   1   8    3.72    0.39
  -9   1  -8    4.99    0.43
  10  -1   8    0.00    0.21
 -10  -1  -8   -0.09    0.18
 -10   1  -8    0.23    0.21
  10   1   8    0.37    0.25
 -11  -1  -8    0.12    0.22
  11  -1   8   -0.18    0.20
  11   1   8   -0.01    0.24
 -11   1  -8   -0.02    0.23
  12  -1   8    2.50    0.40
 -12  -1  -8    2.19    0.37
 -12   1  -8    2.43    0.38
  12   1   8    2.37    0.41
  13  -1   8    0.11    0.26
 -13  -1  -8    0.41    0.26
  13   1   8   -0.16    0.27
 -13   1  -8    0.18    0.27
  13  -2  -8   -0.37    0.23
 -13  -2   8   -0.17    0.21
 -13   2   8   -0.19    0.24
  13   2  -8   -0.40    0.23
  12  -2  -8    1.05    0.31
 -12  -2   8    0.67    0.28
 -12   2   8    1.85    0.33
  12   2  -8    1.42    0.32
  11  -2  -8   -0.18    0.22
 -11  -2   8   -0.10    0.19
 -11   2   8    0.24    0.23
  11   2  -8   -0.11    0.23
 -10  -2   8    1.97    0.29
  10  -2  -8    1.71    0.29
  10   2  -8    2.84    0.36
 -10   2   8    2.16    0.32
   9  -2  -8    0.31    0.22
  -9  -2   8    0.64    0.21
  -9   2   8    0.79    0.24
   9   2  -8    0.45    0.23
   8  -2  -8    0.48    0.23
  -8  -2   8    0.69    0.21
  -8  -2   8    1.13    0.13
   8   2  -8    0.81    0.23
  -8   2   8    0.93    0.22
  -7  -2   8    5.37    0.27
  -7  -2   8    5.61    0.35
   7  -2  -8    5.70    0.40
  -7   2   8    5.23    0.36
   7   2  -8    5.77    0.38
  -6  -2   8    0.04    0.10
   6  -2  -8    0.10    0.16
  -6  -2   8    0.17    0.15
  -6   2   8    0.07    0.15
   6   2  -8   -0.08    0.13
  -5  -2   8    1.56    0.19
  -5  -2   8    1.75    0.17
   5  -2  -8    1.63    0.21
  -5   2   8    1.34    0.20
   5   2  -8    1.37    0.20
   4  -2  -8    3.58    0.25
  -4  -2   8    3.87    0.26
   4   2  -8    4.15    0.28
  -4   2   8    3.46    0.27
   3  -2  -8    3.28    0.23
  -3  -2   8    3.16    0.21
  -3  -2   8    3.21    0.22
  -3   2   8    2.84    0.23
   3   2  -8    2.76    0.23
  -2  -2   8   20.79    0.64
   2  -2  -8   22.21    0.65
  -2   2   8   21.40    0.66
  -2   2   8   21.49    0.66
   2   2  -8   20.75    0.64
  -1  -2   8    1.01    0.13
  -1  -2   8    0.82    0.13
   1  -2  -8    0.96    0.14
  -1   2   8    0.93    0.14
   1   2  -8    0.79    0.14
   0  -2   8   60.13    1.53
   0  -2   8   59.24    1.49
   0  -2  -8   59.77    1.53
   0   2  -8   58.79    1.53
   0   2   8   59.99    1.54
   1  -2   8    5.46    0.25
   1  -2   8    5.05    0.27
  -1  -2  -8    5.83    0.27
   1   2   8    4.96    0.27
  -1   2  -8    5.10    0.26
   2  -2   8   13.25    0.42
   2  -2   8   12.98    0.46
  -2  -2  -8   12.98    0.46
  -2   2  -8   12.67    0.46
   2   2   8   14.05    0.48
   3  -2   8    0.04    0.11
  -3  -2  -8    0.06    0.10
   3   2   8   -0.05    0.10
  -3   2  -8   -0.07    0.11
  -4  -2  -8    6.19    0.31
   4  -2   8    6.15    0.32
   4   2   8    5.91    0.33
  -4   2  -8    6.22    0.34
  -5  -2  -8    1.08    0.17
   5  -2   8    0.81    0.16
  -5   2  -8    0.71    0.18
   5   2   8    0.72    0.17
   6  -2   8    2.20    0.26
  -6  -2  -8    2.22    0.24
  -6   2  -8    1.85    0.24
   6   2   8    2.08    0.25
   7  -2   8    3.68    0.33
  -7  -2  -8    4.63    0.36
   7   2   8    4.37    0.38
  -7   2  -8    4.30    0.34
   8  -2   8    0.78    0.23
  -8  -2  -8    1.58    0.26
  -8   2  -8    0.98    0.24
   8   2   8    0.95    0.25
  -9  -2  -8   -0.11    0.16
   9  -2   8    0.10    0.19
  -9   2  -8   -0.05    0.19
   9   2   8   -0.12    0.20
 -10  -2  -8    1.86    0.30
  10  -2   8    2.35    0.33
 -10   2  -8    2.13    0.32
  10   2   8    1.63    0.31
  11  -2   8    1.12    0.30
 -11  -2  -8    0.94    0.26
 -11   2  -8    1.36    0.29
  11   2   8    1.20    0.30
 -12  -2  -8    0.47    0.24
  12  -2   8   -0.27    0.24
 -12   2  -8    0.07    0.22
  12   2   8    0.16    0.24
  13  -2   8    0.63    0.29
 -13  -2  -8    0.38    0.27
 -13   2  -8    0.21    0.25
  13   2   8    0.37    0.29
  13  -3  -8   -0.25    0.24
 -13   3   8    0.09    0.25
  13   3  -8    0.06    0.25
  12  -3  -8    0.83    0.27
 -12  -3   8    0.26    0.20
  12   3  -8    1.14    0.32
 -12   3   8    0.33    0.24
 -11  -3   8   -0.18    0.15
  11  -3  -8   -0.20    0.19
  11   3  -8    0.14    0.23
 -11   3   8    0.26    0.21
  10  -3  -8    2.53    0.34
 -10  -3   8    3.14    0.35
  10   3  -8    2.66    0.35
 -10   3   8    2.81    0.35
  -9  -3   8    1.02    0.22
   9  -3  -8    0.89    0.23
   9   3  -8    0.80    0.26
  -9   3   8    1.60    0.27
   8  -3  -8    4.36    0.37
  -8  -3   8    4.85    0.34
  -8  -3   8    4.41    0.26
   8   3  -8    3.47    0.35
  -8   3   8    3.81    0.37
  -7  -3   8    1.20    0.17
   7  -3  -8    1.66    0.25
  -7  -3   8    1.52    0.23
   7   3  -8    1.18    0.23
  -7   3   8    1.09    0.22
  -7   3   8    1.53    0.13
  -6  -3   8    0.07    0.11
  -6  -3   8    0.17    0.14
   6  -3  -8    0.18    0.16
  -6   3   8    0.21    0.15
   6   3  -8    0.08    0.15
  -5  -3   8    1.58    0.20
   5  -3  -8    1.08    0.19
  -5  -3   8    1.04    0.15
  -5   3   8    1.15    0.20
   5   3  -8    0.71    0.17
  -4  -3   8    2.82    0.23
  -4  -3   8    2.91    0.21
  -4  -3   8    2.53    0.22
   4  -3  -8    2.40    0.23
   4   3  -8    2.58    0.23
  -4   3   8    2.79    0.25
  -3  -3   8   -0.10    0.10
   3  -3  -8   -0.07    0.10
  -3  -3   8   -0.03    0.10
  -3   3   8    0.04    0.11
   3   3  -8    0.13    0.11
  -2  -3   8    2.75    0.22
   2  -3  -8    2.90    0.22
  -2  -3   8    2.79    0.21
  -2   3   8    3.08    0.21
  -2   3   8    2.68    0.21
   2   3  -8    2.69    0.22
   1  -3  -8   14.31    0.47
  -1  -3   8   14.26    0.47
  -1  -3   8   13.44    0.46
  -1   3   8   14.70    0.49
   1   3  -8   13.70    0.47
   0  -3   8    0.38    0.11
   0  -3  -8    0.70    0.13
   0  -3   8    0.42    0.12
   0   3   8    0.60    0.13
   0   3  -8    0.38    0.11
  -1  -3  -8    2.60    0.21
   1  -3   8    2.31    0.18
   1  -3   8    2.70    0.21
   1   3   8    2.92    0.21
  -1   3  -8    2.55    0.21
   2  -3   8   30.21    0.84
   2  -3   8   29.49    0.85
  -2  -3  -8   29.60    0.85
  -2   3  -8   30.57    0.87
   2   3   8   30.25    0.88
   3  -3   8    2.88    0.23
  -3  -3  -8    2.26    0.20
  -3  -3  -8    2.82    0.12
   3   3   8    3.17    0.24
  -3   3  -8    2.72    0.23
   4  -3   8   24.03    0.77
  -4  -3  -8   24.37    0.76
   4   3   8   24.47    0.78
  -4   3  -8   24.95    0.78
   5  -3   8    1.28    0.20
  -5  -3  -8    1.40    0.20
   5   3   8    1.12    0.20
  -5   3  -8    1.21    0.19
   6  -3   8   17.25    0.66
  -6  -3  -8   17.91    0.64
  -6   3  -8   16.96    0.66
   6   3   8   17.35    0.67
   7  -3   8    2.35    0.28
  -7  -3  -8    2.47    0.27
   7   3   8    2.56    0.30
  -7   3  -8    2.83    0.31
   8  -3   8   -0.06    0.16
  -8  -3  -8    0.14    0.18
   8   3   8   -0.21    0.18
  -8   3  -8    0.23    0.18
   9  -3   8    2.26    0.32
  -9  -3  -8    2.40    0.32
  -9   3  -8    1.77    0.29
   9   3   8    2.22    0.31
 -10  -3  -8    0.16    0.20
  10  -3   8    0.00    0.22
  10   3   8    0.05    0.21
 -10   3  -8   -0.12    0.20
  11  -3   8    2.62    0.38
 -11  -3  -8    2.13    0.33
  11   3   8    1.72    0.33
 -11   3  -8    2.09    0.36
  12  -3   8    0.68    0.28
 -12  -3  -8    0.77    0.27
  12   3   8    1.02    0.32
 -12   3  -8    0.39    0.25
  13  -3   8   -0.01    0.27
  13   3   8    0.28    0.31
 -13   3  -8    0.06    0.24
  13   4  -8    1.09    0.32
 -13   4   8    1.40    0.35
  12  -4  -8    0.27    0.24
  12   4  -8   -0.23    0.24
 -12   4   8    0.22    0.23
  11  -4  -8    0.47    0.23
 -11  -4   8    0.43    0.19
 -11   4   8    0.49    0.24
  11   4  -8    0.11    0.24
 -10  -4   8    0.07    0.16
  10  -4  -8    0.29    0.21
 -10   4   8   -0.01    0.21
  10   4  -8   -0.34    0.18
   9  -4  -8    0.59    0.22
  -9  -4   8    0.70    0.21
   9   4  -8    0.54    0.23
  -9   4   8    0.65    0.22
  -8  -4   8    6.06    0.39
  -8  -4   8    6.42    0.33
   8  -4  -8    7.28    0.46
   8   4  -8    6.27    0.44
  -8   4   8    6.89    0.43
   7  -4  -8    0.89    0.22
  -7  -4   8    1.38    0.18
  -7  -4   8    1.09    0.20
  -7   4   8    1.04    0.23
   7   4  -8    1.41    0.23
  -7   4   8    1.25    0.14
  -6  -4   8    2.81    0.26
   6  -4  -8    2.40    0.26
  -6  -4   8    3.01    0.24
  -6   4   8    2.99    0.29
   6   4  -8    2.37    0.26
  -5  -4   8    0.42    0.14
  -5  -4   8    0.03    0.11
  -5  -4   8    0.21    0.13
   5  -4  -8    0.05    0.14
  -5   4   8    0.20    0.15
   5   4  -8    0.00    0.14
  -4  -4   8    0.12    0.10
  -4  -4   8   -0.04    0.11
   4  -4  -8   -0.08    0.11
  -4   4   8   -0.10    0.12
   4   4  -8    0.06    0.12
  -3  -4   8    5.63    0.32
  -3  -4   8    6.02    0.28
   3  -4  -8    6.36    0.31
  -3  -4   8    6.53    0.34
  -3   4   8    6.46    0.32
   3   4  -8    5.91    0.31
   2  -4  -8   31.85    0.89
  -2  -4   8   30.62    0.95
  -2  -4   8   31.63    0.92
  -2  -4   8   31.98    0.87
  -2   4   8   31.96    0.91
   2   4  -8   31.87    0.89
  -1  -4   8    1.39    0.14
   1  -4  -8    1.41    0.15
  -1  -4   8    1.03    0.17
  -1  -4   8    1.05    0.16
  -1   4   8    0.95    0.15
   1   4  -8    1.24    0.15
   0  -4   8   36.05    0.99
   0  -4   8   36.76    1.03
   0  -4  -8   37.82    1.01
   0   4   8   37.73    1.03
   0   4  -8   37.82    1.01
  -1  -4  -8    0.00    0.09
   1  -4   8   -0.03    0.10
   1  -4   8   -0.05    0.09
   1   4   8    0.01    0.10
  -1   4  -8    0.00    0.10
   2  -4   8    0.30    0.12
  -2  -4  -8    0.07    0.10
  -2  -4  -8    0.23    0.06
   2  -4   8    0.10    0.12
   2   4   8    0.19    0.11
  -2   4  -8    0.16    0.11
   3  -4   8    0.18    0.12
  -3  -4  -8    0.18    0.11
  -3  -4  -8    0.22    0.07
   3   4   8    0.28    0.13
  -3   4  -8    0.07    0.12
   4  -4   8    3.59    0.26
  -4  -4  -8    3.11    0.17
  -4  -4  -8    3.50    0.25
   4   4   8    3.05    0.27
  -4   4  -8    2.90    0.25
[truncated: 458,244 more chars]
