# Supplementary material for: Primary Amine Nucleophilic Addition to Nitrilium Closo-Dodecaborate [B12H11NCCH3]−: A Simple and Effective Route to the New BNCT Drug Design
Source: Int J Mol Sci. 2021 Dec 13;22(24):13391. doi: 10.3390/ijms222413391 (PMC8707455; doi:10.3390/ijms222413391)
Supplement: Supplementary file 1 [file ijms-22-13391-s001.zip › CCDC 2122677.cif]

 
data_Zh104
 
_audit_creation_method            SHELXL-2014
_chemical_name_systematic
;
 ?
;
_chemical_name_common             ?
_chemical_melting_point           ?
_chemical_formula_moiety          ?
_chemical_formula_sum
 'C32 H49 B12 N2 O3 P' 
_chemical_formula_weight          670.42

loop_
 _atom_type_symbol
 _atom_type_description
 _atom_type_scat_dispersion_real
 _atom_type_scat_dispersion_imag
 _atom_type_scat_source
 'C'  'C'   0.0033   0.0016
 'International Tables Vol C Tables 4.2.6.8 and 6.1.1.4'
 'H'  'H'   0.0000   0.0000
 'International Tables Vol C Tables 4.2.6.8 and 6.1.1.4'
 'B'  'B'   0.0013   0.0007
 'International Tables Vol C Tables 4.2.6.8 and 6.1.1.4'
 'N'  'N'   0.0061   0.0033
 'International Tables Vol C Tables 4.2.6.8 and 6.1.1.4'
 'O'  'O'   0.0106   0.0060
 'International Tables Vol C Tables 4.2.6.8 and 6.1.1.4'
 'P'  'P'   0.1023   0.0942
 'International Tables Vol C Tables 4.2.6.8 and 6.1.1.4'
 
_space_group_crystal_system       monoclinic
_space_group_IT_number            14
_space_group_name_H-M_alt         'P 21/c'
_space_group_name_Hall            '-P 2ybc'
 
_shelx_space_group_comment
;
The symmetry employed for this shelxl refinement is uniquely defined
by the following loop, which should always be used as a source of
symmetry information in preference to the above space-group names.
They are only intended as comments.
;
 
loop_
 _space_group_symop_operation_xyz
 'x, y, z'
 '-x, y+1/2, -z+1/2'
 '-x, -y, -z'
 'x, -y-1/2, z-1/2'
 
_cell_length_a                    10.1707(2)
_cell_length_b                    26.5124(6)
_cell_length_c                    14.0828(3)
_cell_angle_alpha                 90
_cell_angle_beta                  96.0170(10)
_cell_angle_gamma                 90
_cell_volume                      3776.50(14)
_cell_formula_units_Z             4
_cell_measurement_temperature     100(2)
_cell_measurement_reflns_used     6859
_cell_measurement_theta_min       2.91
_cell_measurement_theta_max       26.66
 
_exptl_crystal_description        'fragment'
_exptl_crystal_colour             'colourless'
_exptl_crystal_density_meas       ? 
_exptl_crystal_density_method     ?              
_exptl_crystal_density_diffrn     1.179          
_exptl_crystal_F_000              1416
_exptl_transmission_factor_min    ?                                             
_exptl_transmission_factor_max    ?                                             
_exptl_crystal_size_max           0.360
_exptl_crystal_size_mid           0.320
_exptl_crystal_size_min           0.200
_exptl_absorpt_coefficient_mu     0.109
_shelx_estimated_absorpt_T_min    0.962
_shelx_estimated_absorpt_T_max    0.979
_exptl_absorpt_correction_type    none
_exptl_absorpt_correction_T_min   ? 
_exptl_absorpt_correction_T_max   ? 
_exptl_absorpt_process_details    ? 
 
_exptl_special_details
;
 ?
;
 
_diffrn_ambient_temperature       100(2)
_diffrn_radiation_wavelength      0.71073
_diffrn_radiation_type            MoK\a
_diffrn_source                    ?                       
_diffrn_measurement_device_type    
'Bruker KAPPA APEX II area-detector diffractometer' 
_diffrn_measurement_method        ? 
_diffrn_detector_area_resol_mean  ? 
_diffrn_reflns_number             53688
_diffrn_reflns_av_unetI/netI      0.0627
_diffrn_reflns_av_R_equivalents   0.0718
_diffrn_reflns_limit_h_min        -14
_diffrn_reflns_limit_h_max        14
_diffrn_reflns_limit_k_min        -37
_diffrn_reflns_limit_k_max        37
_diffrn_reflns_limit_l_min        -19
_diffrn_reflns_limit_l_max        19
_diffrn_reflns_theta_min          4.076
_diffrn_reflns_theta_max          29.998
_diffrn_reflns_theta_full         25.242
_diffrn_measured_fraction_theta_max   0.997
_diffrn_measured_fraction_theta_full  0.996
_diffrn_reflns_Laue_measured_fraction_max    0.997
_diffrn_reflns_Laue_measured_fraction_full   0.996
_diffrn_reflns_point_group_measured_fraction_max   0.997
_diffrn_reflns_point_group_measured_fraction_full  0.996
_reflns_number_total              10981
_reflns_number_gt                 7561
_reflns_threshold_expression      'I > 2\s(I)'
_reflns_Friedel_coverage          0.000
_reflns_Friedel_fraction_max      .
_reflns_Friedel_fraction_full     .
 
_reflns_special_details
;
 Reflections were merged by SHELXL according to the crystal
 class for the calculation of statistics and refinement.
 
 _reflns_Friedel_fraction is defined as the number of unique
 Friedel pairs measured divided by the number that would be
 possible theoretically, ignoring centric projections and
 systematic absences.
;
 
_computing_data_collection        ?
_computing_cell_refinement        ?
_computing_data_reduction         ?
_computing_structure_solution     ?
_computing_structure_refinement   'SHELXL-2014 (Sheldrick, 2014)'
_computing_molecular_graphics     ?
_computing_publication_material   ?
 
_refine_special_details
;
 ?
;
_refine_ls_structure_factor_coef  Fsqd
_refine_ls_matrix_type            full
_refine_ls_weighting_scheme       calc
_refine_ls_weighting_details
'w=1/[\s^2^(Fo^2^)+(0.0501P)^2^+1.1298P] where P=(Fo^2^+2Fc^2^)/3'
_atom_sites_solution_primary      ?
_atom_sites_solution_secondary    ?
_atom_sites_solution_hydrogens    mixed
_refine_ls_hydrogen_treatment     mixed
_refine_ls_extinction_method      none
_refine_ls_extinction_coef        .
_refine_ls_number_reflns          10981
_refine_ls_number_parameters      489
_refine_ls_number_restraints      0
_refine_ls_R_factor_all           0.0842
_refine_ls_R_factor_gt            0.0495
_refine_ls_wR_factor_ref          0.1264
_refine_ls_wR_factor_gt           0.1100
_refine_ls_goodness_of_fit_ref    1.026
_refine_ls_restrained_S_all       1.026
_refine_ls_shift/su_max           0.001
_refine_ls_shift/su_mean          0.000
 
loop_
 _atom_site_label
 _atom_site_type_symbol
 _atom_site_fract_x
 _atom_site_fract_y
 _atom_site_fract_z
 _atom_site_U_iso_or_equiv
 _atom_site_adp_type
 _atom_site_occupancy
 _atom_site_site_symmetry_order  
 _atom_site_calc_flag
 _atom_site_refinement_flags_posn
 _atom_site_refinement_flags_adp
 _atom_site_refinement_flags_occupancy
 _atom_site_disorder_assembly
 _atom_site_disorder_group
P1 P 0.36896(4) 0.71204(2) 0.65153(3) 0.01452(9) Uani 1 1 d . . . . .
O1 O 0.87185(13) 0.64189(5) 0.79452(10) 0.0376(3) Uani 1 1 d . . . . .
O2 O 1.03844(13) 0.65798(5) 0.90946(9) 0.0321(3) Uani 1 1 d . . . . .
O3 O 0.97002(15) 0.71813(5) 0.81374(11) 0.0436(4) Uani 1 1 d . . . . .
N1 N 0.44393(12) 0.51281(5) 0.15353(9) 0.0191(3) Uani 1 1 d . . . . .
H1A H 0.4237 0.5107 0.0913 0.023 Uiso 1 1 calc R U . . .
N2 N 0.36389(13) 0.50696(5) 0.29861(9) 0.0215(3) Uani 1 1 d . . . . .
H2D H 0.4426 0.5172 0.3230 0.026 Uiso 1 1 calc R U . . .
C1 C 0.34578(15) 0.50310(6) 0.20468(11) 0.0182(3) Uani 1 1 d . . . . .
C2 C 0.21349(15) 0.48881(7) 0.15647(11) 0.0241(3) Uani 1 1 d . . . . .
H2A H 0.2171 0.4879 0.0872 0.036 Uiso 1 1 calc R U . . .
H2B H 0.1477 0.5137 0.1717 0.036 Uiso 1 1 calc R U . . .
H2C H 0.1887 0.4555 0.1788 0.036 Uiso 1 1 calc R U . . .
C3 C 0.26792(16) 0.49618(6) 0.36734(11) 0.0216(3) Uani 1 1 d . . . . .
H3A H 0.1765 0.5020 0.3357 0.026 Uiso 1 1 calc R U . . .
C4 C 0.28063(19) 0.44161(6) 0.39982(13) 0.0292(4) Uani 1 1 d . . . . .
H4A H 0.2561 0.4193 0.3454 0.044 Uiso 1 1 calc R U . . .
H4B H 0.2218 0.4355 0.4494 0.044 Uiso 1 1 calc R U . . .
H4C H 0.3722 0.4349 0.4256 0.044 Uiso 1 1 calc R U . . .
C5 C 0.29449(19) 0.53277(7) 0.45029(12) 0.0288(4) Uani 1 1 d . . . . .
H5A H 0.2831 0.5674 0.4268 0.043 Uiso 1 1 calc R U . . .
H5B H 0.3852 0.5282 0.4800 0.043 Uiso 1 1 calc R U . . .
H5C H 0.2323 0.5262 0.4975 0.043 Uiso 1 1 calc R U . . .
C6 C 0.95207(17) 0.66934(7) 0.83520(13) 0.0287(4) Uani 1 1 d . . . . .
C7 C 1.03608(19) 0.60549(7) 0.93892(13) 0.0304(4) Uani 1 1 d . . . . .
H7A H 1.1081 0.5993 0.9894 0.046 Uiso 1 1 calc R U . . .
H7B H 1.0473 0.5837 0.8841 0.046 Uiso 1 1 calc R U . . .
H7C H 0.9512 0.5980 0.9630 0.046 Uiso 1 1 calc R U . . .
C8 C 0.8831(2) 0.73620(9) 0.73283(17) 0.0526(6) Uani 1 1 d . . . . .
H8A H 0.8998 0.7721 0.7228 0.079 Uiso 1 1 calc R U . . .
H8B H 0.7909 0.7315 0.7453 0.079 Uiso 1 1 calc R U . . .
H8C H 0.8997 0.7172 0.6756 0.079 Uiso 1 1 calc R U . . .
C11 C 0.23697(15) 0.67858(6) 0.58545(10) 0.0164(3) Uani 1 1 d . . . . .
C12 C 0.19279(16) 0.69485(6) 0.49260(11) 0.0206(3) Uani 1 1 d . . . . .
H12A H 0.2351 0.7223 0.4648 0.025 Uiso 1 1 calc R U . . .
C13 C 0.08712(16) 0.67057(6) 0.44194(11) 0.0234(3) Uani 1 1 d . . . . .
H13A H 0.0564 0.6817 0.3794 0.028 Uiso 1 1 calc R U . . .
C14 C 0.02587(17) 0.63026(7) 0.48177(12) 0.0261(4) Uani 1 1 d . . . . .
H14A H -0.0469 0.6139 0.4467 0.031 Uiso 1 1 calc R U . . .
C15 C 0.07090(17) 0.61369(7) 0.57322(12) 0.0264(4) Uani 1 1 d . . . . .
H15A H 0.0294 0.5858 0.6001 0.032 Uiso 1 1 calc R U . . .
C16 C 0.17624(16) 0.63778(6) 0.62537(11) 0.0209(3) Uani 1 1 d . . . . .
H16A H 0.2067 0.6265 0.6879 0.025 Uiso 1 1 calc R U . . .
C21 C 0.31512(15) 0.77372(5) 0.68319(10) 0.0159(3) Uani 1 1 d . . . . .
C22 C 0.19468(15) 0.79395(6) 0.64393(11) 0.0197(3) Uani 1 1 d . . . . .
H22A H 0.1393 0.7756 0.5976 0.024 Uiso 1 1 calc R U . . .
C23 C 0.15695(17) 0.84146(6) 0.67372(11) 0.0234(3) Uani 1 1 d . . . . .
H23A H 0.0747 0.8555 0.6484 0.028 Uiso 1 1 calc R U . . .
C24 C 0.23963(17) 0.86824(6) 0.74039(12) 0.0231(3) Uani 1 1 d . . . . .
H24A H 0.2138 0.9008 0.7597 0.028 Uiso 1 1 calc R U . . .
C25 C 0.35880(16) 0.84832(6) 0.77901(11) 0.0213(3) Uani 1 1 d . . . . .
H25A H 0.4148 0.8672 0.8242 0.026 Uiso 1 1 calc R U . . .
C26 C 0.39638(15) 0.80065(6) 0.75150(11) 0.0183(3) Uani 1 1 d . . . . .
H26A H 0.4772 0.7864 0.7790 0.022 Uiso 1 1 calc R U . . .
C31 C 0.41844(15) 0.68108(5) 0.76212(10) 0.0157(3) Uani 1 1 d . . . . .
C32 C 0.33291(16) 0.68447(6) 0.83396(10) 0.0188(3) Uani 1 1 d . . . . .
H32A H 0.2517 0.7023 0.8226 0.023 Uiso 1 1 calc R U . . .
C33 C 0.36750(17) 0.66178(6) 0.92120(11) 0.0215(3) Uani 1 1 d . . . . .
H33A H 0.3098 0.6638 0.9699 0.026 Uiso 1 1 calc R U . . .
C34 C 0.48617(17) 0.63598(6) 0.93785(11) 0.0236(3) Uani 1 1 d . . . . .
H34A H 0.5095 0.6205 0.9981 0.028 Uiso 1 1 calc R U . . .
C35 C 0.57122(17) 0.63259(6) 0.86732(11) 0.0243(3) Uani 1 1 d . . . . .
H35A H 0.6524 0.6148 0.8793 0.029 Uiso 1 1 calc R U . . .
C36 C 0.53764(16) 0.65522(6) 0.77883(11) 0.0198(3) Uani 1 1 d . . . . .
H36A H 0.5956 0.6530 0.7303 0.024 Uiso 1 1 calc R U . . .
C41 C 0.50496(15) 0.71649(6) 0.58000(10) 0.0168(3) Uani 1 1 d . . . . .
C42 C 0.58049(16) 0.76034(6) 0.57826(11) 0.0219(3) Uani 1 1 d . . . . .
H42A H 0.5595 0.7891 0.6140 0.026 Uiso 1 1 calc R U . . .
C43 C 0.68681(18) 0.76159(7) 0.52378(13) 0.0274(4) Uani 1 1 d . . . . .
H43A H 0.7385 0.7914 0.5222 0.033 Uiso 1 1 calc R U . . .
C44 C 0.71787(17) 0.71966(7) 0.47183(12) 0.0264(4) Uani 1 1 d . . . . .
H44A H 0.7911 0.7207 0.4352 0.032 Uiso 1 1 calc R U . . .
C45 C 0.64247(17) 0.67611(7) 0.47314(12) 0.0264(4) Uani 1 1 d . . . . .
H45A H 0.6641 0.6475 0.4373 0.032 Uiso 1 1 calc R U . . .
C46 C 0.53570(16) 0.67432(6) 0.52664(11) 0.0220(3) Uani 1 1 d . . . . .
H46A H 0.4836 0.6446 0.5271 0.026 Uiso 1 1 calc R U . . .
B1 B 0.68364(17) 0.54746(7) 0.09425(11) 0.0166(3) Uani 1 1 d . . . . .
H1 H 0.6331(17) 0.5498(6) 0.0186(12) 0.020 Uiso 1 1 d . U . . .
B2 B 0.58732(17) 0.52709(6) 0.18487(12) 0.0160(3) Uani 1 1 d . . . . .
B3 B 0.71556(17) 0.48762(7) 0.14953(12) 0.0173(3) Uani 1 1 d . . . . .
H3 H 0.6912(17) 0.4514(7) 0.1106(12) 0.021 Uiso 1 1 d . U . . .
B4 B 0.84902(17) 0.52743(7) 0.12515(12) 0.0164(3) Uani 1 1 d . . . . .
H4 H 0.9127(17) 0.5174(6) 0.0695(12) 0.020 Uiso 1 1 d . U . . .
B5 B 0.80243(18) 0.59141(7) 0.14501(12) 0.0187(3) Uani 1 1 d . . . . .
H5 H 0.8402(18) 0.6251(7) 0.1015(12) 0.022 Uiso 1 1 d . U . . .
B6 B 0.64090(17) 0.59126(7) 0.18208(12) 0.0168(3) Uani 1 1 d . . . . .
H6 H 0.5676(18) 0.6210(6) 0.1642(12) 0.020 Uiso 1 1 d . U . . .
B7 B 0.64718(17) 0.55830(6) 0.29326(11) 0.0160(3) Uani 1 1 d . . . . .
H7 H 0.5806(17) 0.5687(6) 0.3486(12) 0.019 Uiso 1 1 d . U . . .
B8 B 0.69240(17) 0.49396(6) 0.27346(12) 0.0165(3) Uani 1 1 d . . . . .
H8 H 0.6536(17) 0.4624(7) 0.3135(12) 0.020 Uiso 1 1 d . U . . .
B9 B 0.85523(17) 0.49459(6) 0.23621(12) 0.0168(3) Uani 1 1 d . . . . .
H9 H 0.9290(17) 0.4628(6) 0.2546(12) 0.020 Uiso 1 1 d . U . . .
B10 B 0.90845(17) 0.55858(7) 0.23335(12) 0.0174(3) Uani 1 1 d . . . . .
H10 H 1.0164(18) 0.5688(6) 0.2505(12) 0.021 Uiso 1 1 d . U . . .
B11 B 0.78026(17) 0.59793(7) 0.26819(12) 0.0170(3) Uani 1 1 d . . . . .
H11 H 0.7999(17) 0.6356(7) 0.3071(12) 0.020 Uiso 1 1 d . U . . .
B12 B 0.81266(17) 0.53786(7) 0.32435(12) 0.0173(3) Uani 1 1 d . . . . .
H12 H 0.8574(17) 0.5348(7) 0.4009(12) 0.021 Uiso 1 1 d . U . . .
 
loop_
 _atom_site_aniso_label
 _atom_site_aniso_U_11
 _atom_site_aniso_U_22
 _atom_site_aniso_U_33
 _atom_site_aniso_U_23
 _atom_site_aniso_U_13
 _atom_site_aniso_U_12
P1 0.01447(18) 0.01467(18) 0.01417(17) -0.00012(14) 0.00039(13) 0.00135(14)
O1 0.0295(7) 0.0395(8) 0.0419(8) -0.0046(6) -0.0051(6) -0.0069(6)
O2 0.0293(7) 0.0318(7) 0.0337(7) -0.0023(5) -0.0048(5) -0.0042(5)
O3 0.0404(8) 0.0362(8) 0.0503(9) 0.0063(7) -0.0129(7) -0.0090(6)
N1 0.0155(6) 0.0275(7) 0.0142(6) -0.0043(5) 0.0006(5) -0.0010(5)
N2 0.0148(6) 0.0314(8) 0.0181(6) -0.0002(5) 0.0012(5) -0.0046(5)
C1 0.0162(7) 0.0196(7) 0.0190(7) -0.0024(6) 0.0024(6) 0.0009(6)
C2 0.0160(8) 0.0344(9) 0.0215(8) -0.0075(7) 0.0006(6) -0.0015(7)
C3 0.0176(8) 0.0276(8) 0.0205(7) 0.0025(6) 0.0062(6) -0.0012(6)
C4 0.0325(10) 0.0248(9) 0.0315(9) 0.0018(7) 0.0092(7) -0.0018(7)
C5 0.0372(10) 0.0280(9) 0.0228(8) -0.0011(7) 0.0103(7) -0.0042(8)
C6 0.0215(9) 0.0336(10) 0.0313(9) -0.0044(8) 0.0040(7) -0.0025(7)
C7 0.0336(10) 0.0278(9) 0.0297(9) -0.0038(7) 0.0034(7) -0.0006(8)
C8 0.0491(14) 0.0521(14) 0.0529(13) 0.0138(11) -0.0125(11) -0.0031(11)
C11 0.0162(7) 0.0179(7) 0.0146(7) -0.0021(5) -0.0001(5) 0.0016(6)
C12 0.0225(8) 0.0232(8) 0.0159(7) 0.0016(6) 0.0003(6) 0.0000(6)
C13 0.0243(8) 0.0297(9) 0.0152(7) -0.0012(6) -0.0027(6) 0.0026(7)
C14 0.0222(8) 0.0289(9) 0.0254(8) -0.0047(7) -0.0055(6) -0.0033(7)
C15 0.0253(9) 0.0251(8) 0.0276(8) 0.0027(7) -0.0033(7) -0.0077(7)
C16 0.0227(8) 0.0206(8) 0.0185(7) 0.0013(6) -0.0014(6) -0.0011(6)
C21 0.0177(7) 0.0146(7) 0.0159(7) 0.0009(5) 0.0031(5) 0.0018(5)
C22 0.0173(7) 0.0222(8) 0.0193(7) 0.0007(6) 0.0005(6) 0.0042(6)
C23 0.0215(8) 0.0242(8) 0.0247(8) 0.0028(6) 0.0031(6) 0.0078(6)
C24 0.0248(8) 0.0166(7) 0.0292(8) 0.0002(6) 0.0091(7) 0.0032(6)
C25 0.0202(8) 0.0189(8) 0.0254(8) -0.0044(6) 0.0050(6) -0.0021(6)
C26 0.0160(7) 0.0175(7) 0.0213(7) 0.0000(6) 0.0019(6) 0.0010(6)
C31 0.0177(7) 0.0142(7) 0.0144(6) -0.0010(5) -0.0019(5) -0.0010(5)
C32 0.0190(7) 0.0191(7) 0.0179(7) -0.0012(6) 0.0003(6) 0.0007(6)
C33 0.0266(8) 0.0211(8) 0.0166(7) -0.0014(6) 0.0019(6) -0.0011(6)
C34 0.0315(9) 0.0209(8) 0.0171(7) 0.0022(6) -0.0042(6) 0.0005(7)
C35 0.0230(8) 0.0234(8) 0.0250(8) 0.0033(6) -0.0042(6) 0.0060(7)
C36 0.0191(8) 0.0201(8) 0.0199(7) -0.0001(6) 0.0004(6) 0.0029(6)
C41 0.0175(7) 0.0179(7) 0.0148(7) 0.0015(5) 0.0008(5) 0.0023(6)
C42 0.0223(8) 0.0191(8) 0.0249(8) 0.0012(6) 0.0050(6) 0.0017(6)
C43 0.0250(9) 0.0245(9) 0.0336(9) 0.0067(7) 0.0070(7) -0.0013(7)
C44 0.0221(8) 0.0333(9) 0.0252(8) 0.0037(7) 0.0089(6) 0.0032(7)
C45 0.0260(9) 0.0299(9) 0.0244(8) -0.0047(7) 0.0081(7) 0.0046(7)
C46 0.0223(8) 0.0221(8) 0.0218(7) -0.0039(6) 0.0038(6) -0.0002(6)
B1 0.0167(8) 0.0200(8) 0.0133(7) -0.0004(6) 0.0017(6) 0.0032(6)
B2 0.0143(8) 0.0193(8) 0.0145(7) -0.0020(6) 0.0017(6) -0.0002(6)
B3 0.0157(8) 0.0186(8) 0.0175(8) -0.0023(6) 0.0005(6) 0.0013(6)
B4 0.0148(8) 0.0189(8) 0.0158(7) 0.0003(6) 0.0029(6) 0.0007(6)
B5 0.0196(9) 0.0196(8) 0.0172(8) 0.0028(6) 0.0034(6) 0.0008(7)
B6 0.0179(8) 0.0181(8) 0.0149(7) 0.0010(6) 0.0039(6) 0.0032(6)
B7 0.0159(8) 0.0187(8) 0.0138(7) -0.0016(6) 0.0030(6) 0.0000(6)
B8 0.0154(8) 0.0175(8) 0.0166(8) 0.0019(6) 0.0025(6) -0.0004(6)
B9 0.0158(8) 0.0175(8) 0.0168(8) 0.0014(6) 0.0009(6) 0.0019(6)
B10 0.0153(8) 0.0201(8) 0.0169(8) 0.0010(6) 0.0024(6) -0.0013(6)
B11 0.0179(8) 0.0174(8) 0.0156(8) -0.0015(6) 0.0009(6) -0.0017(6)
B12 0.0172(8) 0.0199(8) 0.0142(7) 0.0015(6) -0.0006(6) -0.0034(6)
 
_geom_special_details
;
 All esds (except the esd in the dihedral angle between two l.s. planes)
 are estimated using the full covariance matrix.  The cell esds are taken
 into account individually in the estimation of esds in distances, angles
 and torsion angles; correlations between esds in cell parameters are only
 used when they are defined by crystal symmetry.  An approximate (isotropic)
 treatment of cell esds is used for estimating esds involving l.s. planes.
;
 
loop_
 _geom_bond_atom_site_label_1
 _geom_bond_atom_site_label_2
 _geom_bond_distance
 _geom_bond_site_symmetry_2
 _geom_bond_publ_flag
P1 C31 1.7856(15) . ?
P1 C11 1.7870(15) . ?
P1 C21 1.7955(15) . ?
P1 C41 1.7983(15) . ?
O1 C6 1.194(2) . ?
O2 C6 1.328(2) . ?
O2 C7 1.453(2) . ?
O3 C6 1.345(2) . ?
O3 C8 1.449(2) . ?
N1 C1 1.3162(19) . ?
N1 B2 1.527(2) . ?
N1 H1A 0.8800 . ?
N2 C1 1.3203(19) . ?
N2 C3 1.4729(19) . ?
N2 H2D 0.8800 . ?
C1 C2 1.491(2) . ?
C2 H2A 0.9800 . ?
C2 H2B 0.9800 . ?
C2 H2C 0.9800 . ?
C3 C4 1.519(2) . ?
C3 C5 1.521(2) . ?
C3 H3A 1.0000 . ?
C4 H4A 0.9800 . ?
C4 H4B 0.9800 . ?
C4 H4C 0.9800 . ?
C5 H5A 0.9800 . ?
C5 H5B 0.9800 . ?
C5 H5C 0.9800 . ?
C7 H7A 0.9800 . ?
C7 H7B 0.9800 . ?
C7 H7C 0.9800 . ?
C8 H8A 0.9800 . ?
C8 H8B 0.9800 . ?
C8 H8C 0.9800 . ?
C11 C16 1.393(2) . ?
C11 C12 1.405(2) . ?
C12 C13 1.385(2) . ?
C12 H12A 0.9500 . ?
C13 C14 1.385(2) . ?
C13 H13A 0.9500 . ?
C14 C15 1.392(2) . ?
C14 H14A 0.9500 . ?
C15 C16 1.389(2) . ?
C15 H15A 0.9500 . ?
C16 H16A 0.9500 . ?
C21 C26 1.397(2) . ?
C21 C22 1.397(2) . ?
C22 C23 1.394(2) . ?
C22 H22A 0.9500 . ?
C23 C24 1.388(2) . ?
C23 H23A 0.9500 . ?
C24 C25 1.380(2) . ?
C24 H24A 0.9500 . ?
C25 C26 1.387(2) . ?
C25 H25A 0.9500 . ?
C26 H26A 0.9500 . ?
C31 C36 1.391(2) . ?
C31 C32 1.405(2) . ?
C32 C33 1.380(2) . ?
C32 H32A 0.9500 . ?
C33 C34 1.386(2) . ?
C33 H33A 0.9500 . ?
C34 C35 1.387(2) . ?
C34 H34A 0.9500 . ?
C35 C36 1.393(2) . ?
C35 H35A 0.9500 . ?
C36 H36A 0.9500 . ?
C41 C42 1.395(2) . ?
C41 C46 1.401(2) . ?
C42 C43 1.390(2) . ?
C42 H42A 0.9500 . ?
C43 C44 1.385(2) . ?
C43 H43A 0.9500 . ?
C44 C45 1.387(2) . ?
C44 H44A 0.9500 . ?
C45 C46 1.386(2) . ?
C45 H45A 0.9500 . ?
C46 H46A 0.9500 . ?
B1 B2 1.773(2) . ?
B1 B5 1.774(3) . ?
B1 B4 1.774(2) . ?
B1 B3 1.782(2) . ?
B1 B6 1.783(2) . ?
B1 H1 1.135(17) . ?
B2 B3 1.783(2) . ?
B2 B8 1.786(2) . ?
B2 B7 1.786(2) . ?
B2 B6 1.788(2) . ?
B3 B4 1.781(2) . ?
B3 B9 1.783(2) . ?
B3 B8 1.793(2) . ?
B3 H3 1.120(17) . ?
B4 B10 1.782(2) . ?
B4 B9 1.785(2) . ?
B4 B5 1.791(2) . ?
B4 H4 1.100(17) . ?
B5 B6 1.775(2) . ?
B5 B11 1.781(2) . ?
B5 B10 1.785(2) . ?
B5 H5 1.170(17) . ?
B6 B11 1.775(2) . ?
B6 B7 1.788(2) . ?
B6 H6 1.097(18) . ?
B7 B11 1.778(2) . ?
B7 B12 1.779(2) . ?
B7 B8 1.796(2) . ?
B7 H7 1.119(16) . ?
B8 B12 1.783(2) . ?
B8 B9 1.789(2) . ?
B8 H8 1.103(17) . ?
B9 B12 1.777(2) . ?
B9 B10 1.782(2) . ?
B9 H9 1.140(17) . ?
B10 B12 1.776(2) . ?
B10 B11 1.779(2) . ?
B10 H10 1.132(18) . ?
B11 B12 1.793(2) . ?
B11 H11 1.146(17) . ?
B12 H12 1.127(17) . ?
 
loop_
 _geom_angle_atom_site_label_1
 _geom_angle_atom_site_label_2
 _geom_angle_atom_site_label_3
 _geom_angle
 _geom_angle_site_symmetry_1
 _geom_angle_site_symmetry_3
 _geom_angle_publ_flag
C31 P1 C11 110.71(7) . . ?
C31 P1 C21 105.52(7) . . ?
C11 P1 C21 110.45(7) . . ?
C31 P1 C41 110.84(7) . . ?
C11 P1 C41 108.71(7) . . ?
C21 P1 C41 110.60(7) . . ?
C6 O2 C7 114.37(14) . . ?
C6 O3 C8 114.11(16) . . ?
C1 N1 B2 130.29(13) . . ?
C1 N1 H1A 114.9 . . ?
B2 N1 H1A 114.9 . . ?
C1 N2 C3 127.66(14) . . ?
C1 N2 H2D 116.2 . . ?
C3 N2 H2D 116.2 . . ?
N1 C1 N2 119.94(14) . . ?
N1 C1 C2 120.03(13) . . ?
N2 C1 C2 120.02(14) . . ?
C1 C2 H2A 109.5 . . ?
C1 C2 H2B 109.5 . . ?
H2A C2 H2B 109.5 . . ?
C1 C2 H2C 109.5 . . ?
H2A C2 H2C 109.5 . . ?
H2B C2 H2C 109.5 . . ?
N2 C3 C4 109.95(13) . . ?
N2 C3 C5 107.73(13) . . ?
C4 C3 C5 111.94(14) . . ?
N2 C3 H3A 109.1 . . ?
C4 C3 H3A 109.1 . . ?
C5 C3 H3A 109.1 . . ?
C3 C4 H4A 109.5 . . ?
C3 C4 H4B 109.5 . . ?
H4A C4 H4B 109.5 . . ?
C3 C4 H4C 109.5 . . ?
H4A C4 H4C 109.5 . . ?
H4B C4 H4C 109.5 . . ?
C3 C5 H5A 109.5 . . ?
C3 C5 H5B 109.5 . . ?
H5A C5 H5B 109.5 . . ?
C3 C5 H5C 109.5 . . ?
H5A C5 H5C 109.5 . . ?
H5B C5 H5C 109.5 . . ?
O1 C6 O2 127.01(18) . . ?
O1 C6 O3 125.48(18) . . ?
O2 C6 O3 107.51(15) . . ?
O2 C7 H7A 109.5 . . ?
O2 C7 H7B 109.5 . . ?
H7A C7 H7B 109.5 . . ?
O2 C7 H7C 109.5 . . ?
H7A C7 H7C 109.5 . . ?
H7B C7 H7C 109.5 . . ?
O3 C8 H8A 109.5 . . ?
O3 C8 H8B 109.5 . . ?
H8A C8 H8B 109.5 . . ?
O3 C8 H8C 109.5 . . ?
H8A C8 H8C 109.5 . . ?
H8B C8 H8C 109.5 . . ?
C16 C11 C12 120.12(14) . . ?
C16 C11 P1 121.07(11) . . ?
C12 C11 P1 118.79(12) . . ?
C13 C12 C11 119.47(15) . . ?
C13 C12 H12A 120.3 . . ?
C11 C12 H12A 120.3 . . ?
C12 C13 C14 120.51(15) . . ?
C12 C13 H13A 119.7 . . ?
C14 C13 H13A 119.7 . . ?
C13 C14 C15 120.00(15) . . ?
C13 C14 H14A 120.0 . . ?
C15 C14 H14A 120.0 . . ?
C16 C15 C14 120.31(15) . . ?
C16 C15 H15A 119.8 . . ?
C14 C15 H15A 119.8 . . ?
C15 C16 C11 119.58(14) . . ?
C15 C16 H16A 120.2 . . ?
C11 C16 H16A 120.2 . . ?
C26 C21 C22 120.47(14) . . ?
C26 C21 P1 117.56(11) . . ?
C22 C21 P1 121.94(12) . . ?
C23 C22 C21 119.04(15) . . ?
C23 C22 H22A 120.5 . . ?
C21 C22 H22A 120.5 . . ?
C24 C23 C22 119.96(15) . . ?
C24 C23 H23A 120.0 . . ?
C22 C23 H23A 120.0 . . ?
C25 C24 C23 121.02(15) . . ?
C25 C24 H24A 119.5 . . ?
C23 C24 H24A 119.5 . . ?
C24 C25 C26 119.65(15) . . ?
C24 C25 H25A 120.2 . . ?
C26 C25 H25A 120.2 . . ?
C25 C26 C21 119.84(15) . . ?
C25 C26 H26A 120.1 . . ?
C21 C26 H26A 120.1 . . ?
C36 C31 C32 120.29(14) . . ?
C36 C31 P1 122.34(12) . . ?
C32 C31 P1 117.36(11) . . ?
C33 C32 C31 119.60(15) . . ?
C33 C32 H32A 120.2 . . ?
C31 C32 H32A 120.2 . . ?
C32 C33 C34 120.14(15) . . ?
C32 C33 H33A 119.9 . . ?
C34 C33 H33A 119.9 . . ?
C33 C34 C35 120.56(15) . . ?
C33 C34 H34A 119.7 . . ?
C35 C34 H34A 119.7 . . ?
C34 C35 C36 120.00(15) . . ?
C34 C35 H35A 120.0 . . ?
C36 C35 H35A 120.0 . . ?
C31 C36 C35 119.42(15) . . ?
C31 C36 H36A 120.3 . . ?
C35 C36 H36A 120.3 . . ?
C42 C41 C46 120.09(14) . . ?
C42 C41 P1 121.46(12) . . ?
C46 C41 P1 118.44(12) . . ?
C43 C42 C41 119.41(15) . . ?
C43 C42 H42A 120.3 . . ?
C41 C42 H42A 120.3 . . ?
C44 C43 C42 120.39(16) . . ?
C44 C43 H43A 119.8 . . ?
C42 C43 H43A 119.8 . . ?
C43 C44 C45 120.26(15) . . ?
C43 C44 H44A 119.9 . . ?
C45 C44 H44A 119.9 . . ?
C46 C45 C44 120.10(16) . . ?
C46 C45 H45A 120.0 . . ?
C44 C45 H45A 120.0 . . ?
C45 C46 C41 119.74(15) . . ?
C45 C46 H46A 120.1 . . ?
C41 C46 H46A 120.1 . . ?
B2 B1 B5 108.33(11) . . ?
B2 B1 B4 108.27(11) . . ?
B5 B1 B4 60.64(10) . . ?
B2 B1 B3 60.22(10) . . ?
B5 B1 B3 108.88(12) . . ?
B4 B1 B3 60.11(10) . . ?
B2 B1 B6 60.39(9) . . ?
B5 B1 B6 59.87(10) . . ?
B4 B1 B6 108.58(12) . . ?
B3 B1 B6 108.86(11) . . ?
B2 B1 H1 117.6(9) . . ?
B5 B1 H1 124.3(9) . . ?
B4 B1 H1 124.8(9) . . ?
B3 B1 H1 120.2(9) . . ?
B6 B1 H1 119.7(9) . . ?
N1 B2 B1 116.79(12) . . ?
N1 B2 B3 118.58(12) . . ?
B1 B2 B3 60.15(9) . . ?
N1 B2 B8 124.31(13) . . ?
B1 B2 B8 108.50(12) . . ?
B3 B2 B8 60.32(9) . . ?
N1 B2 B7 126.28(12) . . ?
B1 B2 B7 108.03(12) . . ?
B3 B2 B7 108.46(12) . . ?
B8 B2 B7 60.36(9) . . ?
N1 B2 B6 120.91(13) . . ?
B1 B2 B6 60.10(9) . . ?
B3 B2 B6 108.58(12) . . ?
B8 B2 B6 108.77(12) . . ?
B7 B2 B6 60.04(9) . . ?
B4 B3 B1 59.73(10) . . ?
B4 B3 B9 60.12(9) . . ?
B1 B3 B9 107.61(12) . . ?
B4 B3 B2 107.50(12) . . ?
B1 B3 B2 59.63(9) . . ?
B9 B3 B2 107.56(12) . . ?
B4 B3 B8 108.21(12) . . ?
B1 B3 B8 107.77(12) . . ?
B9 B3 B8 60.03(9) . . ?
B2 B3 B8 59.92(9) . . ?
B4 B3 H3 123.2(9) . . ?
B1 B3 H3 121.9(9) . . ?
B9 B3 H3 122.9(9) . . ?
B2 B3 H3 120.5(9) . . ?
B8 B3 H3 120.7(9) . . ?
B1 B4 B3 60.16(10) . . ?
B1 B4 B10 107.39(12) . . ?
B3 B4 B10 107.87(11) . . ?
B1 B4 B9 107.85(12) . . ?
B3 B4 B9 59.99(9) . . ?
B10 B4 B9 59.95(9) . . ?
B1 B4 B5 59.68(10) . . ?
B3 B4 B5 108.16(12) . . ?
B10 B4 B5 59.94(10) . . ?
B9 B4 B5 108.10(12) . . ?
B1 B4 H4 120.7(9) . . ?
B3 B4 H4 120.8(9) . . ?
B10 B4 H4 123.3(9) . . ?
B9 B4 H4 122.5(9) . . ?
B5 B4 H4 121.6(9) . . ?
B1 B5 B6 60.32(10) . . ?
B1 B5 B11 107.81(12) . . ?
B6 B5 B11 59.88(9) . . ?
B1 B5 B10 107.25(12) . . ?
B6 B5 B10 107.70(12) . . ?
B11 B5 B10 59.83(10) . . ?
B1 B5 B4 59.68(10) . . ?
B6 B5 B4 108.18(12) . . ?
B11 B5 B4 107.85(12) . . ?
B10 B5 B4 59.78(10) . . ?
B1 B5 H5 122.5(9) . . ?
B6 B5 H5 121.4(9) . . ?
B11 B5 H5 121.2(8) . . ?
B10 B5 H5 122.0(9) . . ?
B4 B5 H5 122.3(9) . . ?
B11 B6 B5 60.22(10) . . ?
B11 B6 B1 107.67(12) . . ?
B5 B6 B1 59.81(10) . . ?
B11 B6 B7 59.86(9) . . ?
B5 B6 B7 108.02(12) . . ?
B1 B6 B7 107.46(12) . . ?
B11 B6 B2 107.65(12) . . ?
B5 B6 B2 107.58(12) . . ?
B1 B6 B2 59.51(9) . . ?
B7 B6 B2 59.92(9) . . ?
B11 B6 H6 124.1(9) . . ?
B5 B6 H6 123.9(9) . . ?
B1 B6 H6 121.2(9) . . ?
B7 B6 H6 120.9(9) . . ?
B2 B6 H6 119.3(9) . . ?
B11 B7 B12 60.56(10) . . ?
B11 B7 B2 107.61(11) . . ?
B12 B7 B2 107.35(12) . . ?
B11 B7 B6 59.70(10) . . ?
B12 B7 B6 108.09(12) . . ?
B2 B7 B6 60.04(9) . . ?
B11 B7 B8 108.53(12) . . ?
B12 B7 B8 59.85(10) . . ?
B2 B7 B8 59.81(9) . . ?
B6 B7 B8 108.32(11) . . ?
B11 B7 H7 121.4(9) . . ?
B12 B7 H7 122.0(9) . . ?
B2 B7 H7 122.2(9) . . ?
B6 B7 H7 121.3(9) . . ?
B8 B7 H7 121.7(9) . . ?
B12 B8 B2 107.15(12) . . ?
B12 B8 B9 59.65(10) . . ?
B2 B8 B9 107.16(11) . . ?
B12 B8 B3 107.32(12) . . ?
B2 B8 B3 59.75(9) . . ?
B9 B8 B3 59.70(9) . . ?
B12 B8 B7 59.59(10) . . ?
B2 B8 B7 59.82(9) . . ?
B9 B8 B7 107.26(12) . . ?
B3 B8 B7 107.58(11) . . ?
B12 B8 H8 123.7(9) . . ?
B2 B8 H8 120.6(9) . . ?
B9 B8 H8 123.2(9) . . ?
B3 B8 H8 121.1(9) . . ?
B7 B8 H8 121.9(9) . . ?
B12 B9 B10 59.87(9) . . ?
B12 B9 B3 108.07(12) . . ?
B10 B9 B3 107.77(12) . . ?
B12 B9 B4 107.96(12) . . ?
B10 B9 B4 59.94(9) . . ?
B3 B9 B4 59.88(9) . . ?
B12 B9 B8 60.02(10) . . ?
B10 B9 B8 107.95(12) . . ?
B3 B9 B8 60.27(9) . . ?
B4 B9 B8 108.21(12) . . ?
B12 B9 H9 121.4(9) . . ?
B10 B9 H9 120.9(9) . . ?
B3 B9 H9 122.5(9) . . ?
B4 B9 H9 121.4(8) . . ?
B8 B9 H9 122.3(9) . . ?
B12 B10 B11 60.59(10) . . ?
B12 B10 B4 108.12(12) . . ?
B11 B10 B4 108.36(12) . . ?
B12 B10 B9 59.90(10) . . ?
B11 B10 B9 108.60(12) . . ?
B4 B10 B9 60.11(10) . . ?
B12 B10 B5 108.46(12) . . ?
B11 B10 B5 59.97(10) . . ?
B4 B10 B5 60.28(10) . . ?
B9 B10 B5 108.49(12) . . ?
B12 B10 H10 120.9(9) . . ?
B11 B10 H10 121.5(9) . . ?
B4 B10 H10 121.9(9) . . ?
B9 B10 H10 120.9(9) . . ?
B5 B10 H10 122.2(9) . . ?
B6 B11 B7 60.45(9) . . ?
B6 B11 B10 108.00(12) . . ?
B7 B11 B10 107.66(12) . . ?
B6 B11 B5 59.89(9) . . ?
B7 B11 B5 108.23(12) . . ?
B10 B11 B5 60.20(10) . . ?
B6 B11 B12 108.03(12) . . ?
B7 B11 B12 59.74(10) . . ?
B10 B11 B12 59.64(10) . . ?
B5 B11 B12 107.89(12) . . ?
B6 B11 H11 120.0(9) . . ?
B7 B11 H11 121.2(9) . . ?
B10 B11 H11 123.2(9) . . ?
B5 B11 H11 121.1(8) . . ?
B12 B11 H11 123.2(9) . . ?
B10 B12 B9 60.22(10) . . ?
B10 B12 B7 107.73(12) . . ?
B9 B12 B7 108.56(12) . . ?
B10 B12 B8 108.47(12) . . ?
B9 B12 B8 60.33(9) . . ?
B7 B12 B8 60.56(10) . . ?
B10 B12 B11 59.77(10) . . ?
B9 B12 B11 108.20(11) . . ?
B7 B12 B11 59.70(10) . . ?
B8 B12 B11 108.40(12) . . ?
B10 B12 H12 121.0(9) . . ?
B9 B12 H12 121.2(9) . . ?
B7 B12 H12 122.2(9) . . ?
B8 B12 H12 121.9(9) . . ?
B11 B12 H12 121.4(9) . . ?
 
loop_
 _geom_torsion_atom_site_label_1
 _geom_torsion_atom_site_label_2
 _geom_torsion_atom_site_label_3
 _geom_torsion_atom_site_label_4
 _geom_torsion
 _geom_torsion_site_symmetry_1
 _geom_torsion_site_symmetry_2
 _geom_torsion_site_symmetry_3
 _geom_torsion_site_symmetry_4
 _geom_torsion_publ_flag
B2 N1 C1 N2 2.5(3) . . . . ?
B2 N1 C1 C2 -178.75(15) . . . . ?
C3 N2 C1 N1 -177.93(15) . . . . ?
C3 N2 C1 C2 3.3(2) . . . . ?
C1 N2 C3 C4 91.4(2) . . . . ?
C1 N2 C3 C5 -146.38(16) . . . . ?
C7 O2 C6 O1 3.3(3) . . . . ?
C7 O2 C6 O3 -177.20(14) . . . . ?
C8 O3 C6 O1 -1.1(3) . . . . ?
C8 O3 C6 O2 179.42(17) . . . . ?
C31 P1 C11 C16 7.06(15) . . . . ?
C21 P1 C11 C16 -109.44(13) . . . . ?
C41 P1 C11 C16 129.04(13) . . . . ?
C31 P1 C11 C12 -174.40(12) . . . . ?
C21 P1 C11 C12 69.10(14) . . . . ?
C41 P1 C11 C12 -52.42(14) . . . . ?
C16 C11 C12 C13 1.1(2) . . . . ?
P1 C11 C12 C13 -177.42(12) . . . . ?
C11 C12 C13 C14 -0.6(2) . . . . ?
C12 C13 C14 C15 -0.3(3) . . . . ?
C13 C14 C15 C16 0.7(3) . . . . ?
C14 C15 C16 C11 -0.2(3) . . . . ?
C12 C11 C16 C15 -0.7(2) . . . . ?
P1 C11 C16 C15 177.79(13) . . . . ?
C31 P1 C21 C26 47.08(13) . . . . ?
C11 P1 C21 C26 166.77(11) . . . . ?
C41 P1 C21 C26 -72.84(13) . . . . ?
C31 P1 C21 C22 -130.90(13) . . . . ?
C11 P1 C21 C22 -11.22(15) . . . . ?
C41 P1 C21 C22 109.17(13) . . . . ?
C26 C21 C22 C23 0.2(2) . . . . ?
P1 C21 C22 C23 178.10(12) . . . . ?
C21 C22 C23 C24 1.0(2) . . . . ?
C22 C23 C24 C25 -0.8(2) . . . . ?
C23 C24 C25 C26 -0.5(2) . . . . ?
C24 C25 C26 C21 1.6(2) . . . . ?
C22 C21 C26 C25 -1.5(2) . . . . ?
P1 C21 C26 C25 -179.51(12) . . . . ?
C11 P1 C31 C36 108.30(13) . . . . ?
C21 P1 C31 C36 -132.19(13) . . . . ?
C41 P1 C31 C36 -12.43(15) . . . . ?
C11 P1 C31 C32 -72.94(13) . . . . ?
C21 P1 C31 C32 46.57(13) . . . . ?
C41 P1 C31 C32 166.34(11) . . . . ?
C36 C31 C32 C33 -0.3(2) . . . . ?
P1 C31 C32 C33 -179.11(12) . . . . ?
C31 C32 C33 C34 0.3(2) . . . . ?
C32 C33 C34 C35 -0.1(2) . . . . ?
C33 C34 C35 C36 0.0(3) . . . . ?
C32 C31 C36 C35 0.2(2) . . . . ?
P1 C31 C36 C35 178.94(12) . . . . ?
C34 C35 C36 C31 -0.1(2) . . . . ?
C31 P1 C41 C42 -97.74(14) . . . . ?
C11 P1 C41 C42 140.36(13) . . . . ?
C21 P1 C41 C42 18.93(15) . . . . ?
C31 P1 C41 C46 81.12(13) . . . . ?
C11 P1 C41 C46 -40.78(14) . . . . ?
C21 P1 C41 C46 -162.20(12) . . . . ?
C46 C41 C42 C43 -0.5(2) . . . . ?
P1 C41 C42 C43 178.36(13) . . . . ?
C41 C42 C43 C44 -0.2(3) . . . . ?
C42 C43 C44 C45 0.5(3) . . . . ?
C43 C44 C45 C46 -0.1(3) . . . . ?
C44 C45 C46 C41 -0.5(3) . . . . ?
C42 C41 C46 C45 0.8(2) . . . . ?
P1 C41 C46 C45 -178.03(13) . . . . ?
C1 N1 B2 B1 -169.83(15) . . . . ?
C1 N1 B2 B3 121.26(17) . . . . ?
C1 N1 B2 B8 49.4(2) . . . . ?
C1 N1 B2 B7 -26.6(3) . . . . ?
C1 N1 B2 B6 -100.23(19) . . . . ?
B5 B1 B2 N1 149.13(13) . . . . ?
B4 B1 B2 N1 -146.63(13) . . . . ?
B3 B1 B2 N1 -109.15(14) . . . . ?
B6 B1 B2 N1 111.93(15) . . . . ?
B5 B1 B2 B3 -101.72(13) . . . . ?
B4 B1 B2 B3 -37.48(11) . . . . ?
B6 B1 B2 B3 -138.91(12) . . . . ?
B5 B1 B2 B8 -64.28(15) . . . . ?
B4 B1 B2 B8 -0.04(16) . . . . ?
B3 B1 B2 B8 37.44(11) . . . . ?
B6 B1 B2 B8 -101.48(13) . . . . ?
B5 B1 B2 B7 -0.35(16) . . . . ?
B4 B1 B2 B7 63.89(15) . . . . ?
B3 B1 B2 B7 101.37(13) . . . . ?
B6 B1 B2 B7 -37.54(11) . . . . ?
B5 B1 B2 B6 37.19(11) . . . . ?
B4 B1 B2 B6 101.43(13) . . . . ?
B3 B1 B2 B6 138.91(12) . . . . ?
B2 B1 B3 B4 -138.21(12) . . . . ?
B5 B1 B3 B4 -37.41(11) . . . . ?
B6 B1 B3 B4 -101.06(13) . . . . ?
B2 B1 B3 B9 -100.42(12) . . . . ?
B5 B1 B3 B9 0.37(15) . . . . ?
B4 B1 B3 B9 37.78(11) . . . . ?
B6 B1 B3 B9 -63.28(15) . . . . ?
B5 B1 B3 B2 100.79(12) . . . . ?
B4 B1 B3 B2 138.21(12) . . . . ?
B6 B1 B3 B2 37.14(11) . . . . ?
B2 B1 B3 B8 -37.08(11) . . . . ?
B5 B1 B3 B8 63.71(14) . . . . ?
B4 B1 B3 B8 101.13(12) . . . . ?
B6 B1 B3 B8 0.06(16) . . . . ?
N1 B2 B3 B4 143.33(13) . . . . ?
B1 B2 B3 B4 37.12(11) . . . . ?
B8 B2 B3 B4 -101.31(12) . . . . ?
B7 B2 B3 B4 -63.51(14) . . . . ?
B6 B2 B3 B4 0.18(15) . . . . ?
N1 B2 B3 B1 106.21(14) . . . . ?
B8 B2 B3 B1 -138.43(12) . . . . ?
B7 B2 B3 B1 -100.64(13) . . . . ?
B6 B2 B3 B1 -36.95(11) . . . . ?
N1 B2 B3 B9 -153.29(13) . . . . ?
B1 B2 B3 B9 100.51(13) . . . . ?
B8 B2 B3 B9 -37.93(11) . . . . ?
B7 B2 B3 B9 -0.13(15) . . . . ?
B6 B2 B3 B9 63.56(14) . . . . ?
N1 B2 B3 B8 -115.36(15) . . . . ?
B1 B2 B3 B8 138.43(12) . . . . ?
B7 B2 B3 B8 37.80(11) . . . . ?
B6 B2 B3 B8 101.49(12) . . . . ?
B2 B1 B4 B3 37.53(11) . . . . ?
B5 B1 B4 B3 138.73(12) . . . . ?
B6 B1 B4 B3 101.55(13) . . . . ?
B2 B1 B4 B10 -63.49(15) . . . . ?
B5 B1 B4 B10 37.71(11) . . . . ?
B3 B1 B4 B10 -101.02(12) . . . . ?
B6 B1 B4 B10 0.53(16) . . . . ?
B2 B1 B4 B9 -0.26(16) . . . . ?
B5 B1 B4 B9 100.95(13) . . . . ?
B3 B1 B4 B9 -37.78(11) . . . . ?
B6 B1 B4 B9 63.76(15) . . . . ?
B2 B1 B4 B5 -101.20(12) . . . . ?
B3 B1 B4 B5 -138.73(12) . . . . ?
B6 B1 B4 B5 -37.18(11) . . . . ?
B9 B3 B4 B1 -137.66(12) . . . . ?
B2 B3 B4 B1 -37.08(11) . . . . ?
B8 B3 B4 B1 -100.37(12) . . . . ?
B1 B3 B4 B10 100.20(13) . . . . ?
B9 B3 B4 B10 -37.47(11) . . . . ?
B2 B3 B4 B10 63.12(14) . . . . ?
B8 B3 B4 B10 -0.17(16) . . . . ?
B1 B3 B4 B9 137.66(12) . . . . ?
B2 B3 B4 B9 100.58(12) . . . . ?
B8 B3 B4 B9 37.30(11) . . . . ?
B1 B3 B4 B5 36.82(11) . . . . ?
B9 B3 B4 B5 -100.85(12) . . . . ?
B2 B3 B4 B5 -0.26(15) . . . . ?
B8 B3 B4 B5 -63.55(14) . . . . ?
B2 B1 B5 B6 -37.42(11) . . . . ?
B4 B1 B5 B6 -138.52(12) . . . . ?
B3 B1 B5 B6 -101.34(12) . . . . ?
B2 B1 B5 B11 0.43(16) . . . . ?
B4 B1 B5 B11 -100.67(13) . . . . ?
B3 B1 B5 B11 -63.49(15) . . . . ?
B6 B1 B5 B11 37.85(11) . . . . ?
B2 B1 B5 B10 63.50(14) . . . . ?
B4 B1 B5 B10 -37.61(11) . . . . ?
B3 B1 B5 B10 -0.42(15) . . . . ?
B6 B1 B5 B10 100.92(12) . . . . ?
B2 B1 B5 B4 101.10(12) . . . . ?
B3 B1 B5 B4 37.18(11) . . . . ?
B6 B1 B5 B4 138.52(12) . . . . ?
B3 B4 B5 B1 -37.02(11) . . . . ?
B10 B4 B5 B1 -137.59(12) . . . . ?
B9 B4 B5 B1 -100.51(12) . . . . ?
B1 B4 B5 B6 37.28(11) . . . . ?
B3 B4 B5 B6 0.25(15) . . . . ?
B10 B4 B5 B6 -100.31(12) . . . . ?
B9 B4 B5 B6 -63.23(15) . . . . ?
B1 B4 B5 B11 100.59(13) . . . . ?
B3 B4 B5 B11 63.57(15) . . . . ?
B10 B4 B5 B11 -37.00(11) . . . . ?
B9 B4 B5 B11 0.09(16) . . . . ?
B1 B4 B5 B10 137.59(12) . . . . ?
B3 B4 B5 B10 100.57(12) . . . . ?
B9 B4 B5 B10 37.09(11) . . . . ?
B1 B5 B6 B11 137.52(12) . . . . ?
B10 B5 B6 B11 37.35(11) . . . . ?
B4 B5 B6 B11 100.52(13) . . . . ?
B11 B5 B6 B1 -137.52(12) . . . . ?
B10 B5 B6 B1 -100.17(13) . . . . ?
B4 B5 B6 B1 -37.00(11) . . . . ?
B1 B5 B6 B7 100.13(13) . . . . ?
B11 B5 B6 B7 -37.39(11) . . . . ?
B10 B5 B6 B7 -0.04(16) . . . . ?
B4 B5 B6 B7 63.13(15) . . . . ?
B1 B5 B6 B2 36.85(11) . . . . ?
B11 B5 B6 B2 -100.66(13) . . . . ?
B10 B5 B6 B2 -63.31(15) . . . . ?
B4 B5 B6 B2 -0.14(15) . . . . ?
B2 B1 B6 B11 100.46(13) . . . . ?
B5 B1 B6 B11 -37.97(11) . . . . ?
B4 B1 B6 B11 -0.45(16) . . . . ?
B3 B1 B6 B11 63.39(15) . . . . ?
B2 B1 B6 B5 138.43(12) . . . . ?
B4 B1 B6 B5 37.52(11) . . . . ?
B3 B1 B6 B5 101.36(13) . . . . ?
B2 B1 B6 B7 37.35(11) . . . . ?
B5 B1 B6 B7 -101.08(13) . . . . ?
B4 B1 B6 B7 -63.56(15) . . . . ?
B3 B1 B6 B7 0.28(16) . . . . ?
B5 B1 B6 B2 -138.43(12) . . . . ?
B4 B1 B6 B2 -100.92(13) . . . . ?
B3 B1 B6 B2 -37.07(11) . . . . ?
N1 B2 B6 B11 154.32(13) . . . . ?
B1 B2 B6 B11 -100.51(13) . . . . ?
B3 B2 B6 B11 -63.54(14) . . . . ?
B8 B2 B6 B11 0.52(15) . . . . ?
B7 B2 B6 B11 37.52(11) . . . . ?
N1 B2 B6 B5 -142.16(13) . . . . ?
B1 B2 B6 B5 -36.98(11) . . . . ?
B3 B2 B6 B5 -0.02(15) . . . . ?
B8 B2 B6 B5 64.04(14) . . . . ?
B7 B2 B6 B5 101.04(13) . . . . ?
N1 B2 B6 B1 -105.17(14) . . . . ?
B3 B2 B6 B1 36.97(11) . . . . ?
B8 B2 B6 B1 101.03(12) . . . . ?
B7 B2 B6 B1 138.02(12) . . . . ?
N1 B2 B6 B7 116.80(15) . . . . ?
B1 B2 B6 B7 -138.02(12) . . . . ?
B3 B2 B6 B7 -101.06(13) . . . . ?
B8 B2 B6 B7 -37.00(11) . . . . ?
N1 B2 B7 B11 -145.64(14) . . . . ?
B1 B2 B7 B11 0.14(16) . . . . ?
B3 B2 B7 B11 63.82(15) . . . . ?
B8 B2 B7 B11 101.60(13) . . . . ?
B6 B2 B7 B11 -37.44(11) . . . . ?
N1 B2 B7 B12 150.53(14) . . . . ?
B1 B2 B7 B12 -63.69(14) . . . . ?
B3 B2 B7 B12 0.00(15) . . . . ?
B8 B2 B7 B12 37.78(11) . . . . ?
B6 B2 B7 B12 -101.26(13) . . . . ?
N1 B2 B7 B6 -108.20(17) . . . . ?
B1 B2 B7 B6 37.57(11) . . . . ?
B3 B2 B7 B6 101.26(13) . . . . ?
B8 B2 B7 B6 139.04(12) . . . . ?
N1 B2 B7 B8 112.76(17) . . . . ?
B1 B2 B7 B8 -101.47(13) . . . . ?
B3 B2 B7 B8 -37.78(11) . . . . ?
B6 B2 B7 B8 -139.04(12) . . . . ?
B5 B6 B7 B11 37.55(11) . . . . ?
B1 B6 B7 B11 100.68(13) . . . . ?
B2 B6 B7 B11 137.85(12) . . . . ?
B11 B6 B7 B12 -37.84(11) . . . . ?
B5 B6 B7 B12 -0.29(16) . . . . ?
B1 B6 B7 B12 62.84(15) . . . . ?
B2 B6 B7 B12 100.01(13) . . . . ?
B11 B6 B7 B2 -137.85(12) . . . . ?
B5 B6 B7 B2 -100.30(13) . . . . ?
B1 B6 B7 B2 -37.17(11) . . . . ?
B11 B6 B7 B8 -101.20(13) . . . . ?
B5 B6 B7 B8 -63.65(15) . . . . ?
B1 B6 B7 B8 -0.52(16) . . . . ?
B2 B6 B7 B8 36.65(11) . . . . ?
N1 B2 B8 B12 -153.46(13) . . . . ?
B1 B2 B8 B12 63.06(14) . . . . ?
B3 B2 B8 B12 100.42(12) . . . . ?
B7 B2 B8 B12 -37.61(11) . . . . ?
B6 B2 B8 B12 -0.75(15) . . . . ?
N1 B2 B8 B9 143.81(14) . . . . ?
B1 B2 B8 B9 0.32(15) . . . . ?
B3 B2 B8 B9 37.68(11) . . . . ?
B7 B2 B8 B9 -100.34(12) . . . . ?
B6 B2 B8 B9 -63.49(14) . . . . ?
N1 B2 B8 B3 106.13(16) . . . . ?
B1 B2 B8 B3 -37.36(11) . . . . ?
B7 B2 B8 B3 -138.02(12) . . . . ?
B6 B2 B8 B3 -101.17(12) . . . . ?
N1 B2 B8 B7 -115.85(16) . . . . ?
B1 B2 B8 B7 100.66(13) . . . . ?
B3 B2 B8 B7 138.02(12) . . . . ?
B6 B2 B8 B7 36.86(11) . . . . ?
B4 B3 B8 B12 -0.02(16) . . . . ?
B1 B3 B8 B12 -63.16(15) . . . . ?
B9 B3 B8 B12 37.32(11) . . . . ?
B2 B3 B8 B12 -100.12(13) . . . . ?
B4 B3 B8 B2 100.09(13) . . . . ?
B1 B3 B8 B2 36.95(11) . . . . ?
B9 B3 B8 B2 137.43(12) . . . . ?
B4 B3 B8 B9 -37.34(11) . . . . ?
B1 B3 B8 B9 -100.48(13) . . . . ?
B2 B3 B8 B9 -137.43(12) . . . . ?
B4 B3 B8 B7 62.76(14) . . . . ?
B1 B3 B8 B7 -0.38(15) . . . . ?
B9 B3 B8 B7 100.10(13) . . . . ?
B2 B3 B8 B7 -37.34(11) . . . . ?
B11 B7 B8 B12 37.43(11) . . . . ?
B2 B7 B8 B12 137.46(12) . . . . ?
B6 B7 B8 B12 100.71(13) . . . . ?
B11 B7 B8 B2 -100.03(12) . . . . ?
B12 B7 B8 B2 -137.46(12) . . . . ?
B6 B7 B8 B2 -36.74(11) . . . . ?
B11 B7 B8 B9 0.16(15) . . . . ?
B12 B7 B8 B9 -37.27(11) . . . . ?
B2 B7 B8 B9 100.19(12) . . . . ?
B6 B7 B8 B9 63.44(14) . . . . ?
B11 B7 B8 B3 -62.72(14) . . . . ?
B12 B7 B8 B3 -100.15(12) . . . . ?
B2 B7 B8 B3 37.31(11) . . . . ?
B6 B7 B8 B3 0.56(15) . . . . ?
B4 B3 B9 B12 100.70(13) . . . . ?
B1 B3 B9 B12 63.09(14) . . . . ?
B2 B3 B9 B12 0.21(16) . . . . ?
B8 B3 B9 B12 -37.66(11) . . . . ?
B4 B3 B9 B10 37.43(11) . . . . ?
B1 B3 B9 B10 -0.17(15) . . . . ?
B2 B3 B9 B10 -63.05(14) . . . . ?
B8 B3 B9 B10 -100.93(13) . . . . ?
B1 B3 B9 B4 -37.61(11) . . . . ?
B2 B3 B9 B4 -100.49(13) . . . . ?
B8 B3 B9 B4 -138.36(12) . . . . ?
B4 B3 B9 B8 138.36(12) . . . . ?
B1 B3 B9 B8 100.76(12) . . . . ?
B2 B3 B9 B8 37.88(11) . . . . ?
B1 B4 B9 B12 -63.03(15) . . . . ?
B3 B4 B9 B12 -100.89(13) . . . . ?
B10 B4 B9 B12 37.13(11) . . . . ?
B5 B4 B9 B12 0.05(16) . . . . ?
B1 B4 B9 B10 -100.16(13) . . . . ?
B3 B4 B9 B10 -138.02(12) . . . . ?
B5 B4 B9 B10 -37.08(11) . . . . ?
B1 B4 B9 B3 37.86(11) . . . . ?
B10 B4 B9 B3 138.02(12) . . . . ?
B5 B4 B9 B3 100.94(13) . . . . ?
B1 B4 B9 B8 0.46(16) . . . . ?
B3 B4 B9 B8 -37.40(11) . . . . ?
B10 B4 B9 B8 100.62(13) . . . . ?
B5 B4 B9 B8 63.54(15) . . . . ?
B2 B8 B9 B12 100.18(12) . . . . ?
B3 B8 B9 B12 137.89(12) . . . . ?
B7 B8 B9 B12 37.24(11) . . . . ?
B12 B8 B9 B10 -37.26(11) . . . . ?
B2 B8 B9 B10 62.92(14) . . . . ?
B3 B8 B9 B10 100.63(13) . . . . ?
B7 B8 B9 B10 -0.02(15) . . . . ?
B12 B8 B9 B3 -137.89(12) . . . . ?
B2 B8 B9 B3 -37.71(11) . . . . ?
B7 B8 B9 B3 -100.64(12) . . . . ?
B12 B8 B9 B4 -100.66(13) . . . . ?
B2 B8 B9 B4 -0.48(15) . . . . ?
B3 B8 B9 B4 37.23(11) . . . . ?
B7 B8 B9 B4 -63.41(14) . . . . ?
B1 B4 B10 B12 63.76(15) . . . . ?
B3 B4 B10 B12 0.30(16) . . . . ?
B9 B4 B10 B12 -37.18(11) . . . . ?
B5 B4 B10 B12 101.35(13) . . . . ?
B1 B4 B10 B11 -0.41(15) . . . . ?
B3 B4 B10 B11 -63.87(15) . . . . ?
B9 B4 B10 B11 -101.35(13) . . . . ?
B5 B4 B10 B11 37.18(11) . . . . ?
B1 B4 B10 B9 100.94(13) . . . . ?
B3 B4 B10 B9 37.49(11) . . . . ?
B5 B4 B10 B9 138.54(12) . . . . ?
B1 B4 B10 B5 -37.59(11) . . . . ?
B3 B4 B10 B5 -101.05(13) . . . . ?
B9 B4 B10 B5 -138.54(12) . . . . ?
B3 B9 B10 B12 100.99(13) . . . . ?
B4 B9 B10 B12 138.40(12) . . . . ?
B8 B9 B10 B12 37.32(11) . . . . ?
B12 B9 B10 B11 -37.45(11) . . . . ?
B3 B9 B10 B11 63.54(14) . . . . ?
B4 B9 B10 B11 100.95(13) . . . . ?
B8 B9 B10 B11 -0.13(15) . . . . ?
B12 B9 B10 B4 -138.40(12) . . . . ?
B3 B9 B10 B4 -37.41(11) . . . . ?
B8 B9 B10 B4 -101.08(12) . . . . ?
B12 B9 B10 B5 -101.08(13) . . . . ?
B3 B9 B10 B5 -0.09(15) . . . . ?
B4 B9 B10 B5 37.32(11) . . . . ?
B8 B9 B10 B5 -63.76(14) . . . . ?
B1 B5 B10 B12 -63.22(15) . . . . ?
B6 B5 B10 B12 0.36(16) . . . . ?
B11 B5 B10 B12 37.73(11) . . . . ?
B4 B5 B10 B12 -100.78(13) . . . . ?
B1 B5 B10 B11 -100.94(13) . . . . ?
B6 B5 B10 B11 -37.37(11) . . . . ?
B4 B5 B10 B11 -138.51(12) . . . . ?
B1 B5 B10 B4 37.56(11) . . . . ?
B6 B5 B10 B4 101.13(13) . . . . ?
B11 B5 B10 B4 138.51(12) . . . . ?
B1 B5 B10 B9 0.31(15) . . . . ?
B6 B5 B10 B9 63.88(15) . . . . ?
B11 B5 B10 B9 101.26(13) . . . . ?
B4 B5 B10 B9 -37.25(11) . . . . ?
B5 B6 B11 B7 -138.10(12) . . . . ?
B1 B6 B11 B7 -100.32(13) . . . . ?
B2 B6 B11 B7 -37.55(11) . . . . ?
B5 B6 B11 B10 -37.59(11) . . . . ?
B1 B6 B11 B10 0.20(16) . . . . ?
B7 B6 B11 B10 100.52(13) . . . . ?
B2 B6 B11 B10 62.97(14) . . . . ?
B1 B6 B11 B5 37.78(11) . . . . ?
B7 B6 B11 B5 138.10(12) . . . . ?
B2 B6 B11 B5 100.56(13) . . . . ?
B5 B6 B11 B12 -100.64(13) . . . . ?
B1 B6 B11 B12 -62.86(14) . . . . ?
B7 B6 B11 B12 37.46(11) . . . . ?
B2 B6 B11 B12 -0.08(15) . . . . ?
B12 B7 B11 B6 137.96(12) . . . . ?
B2 B7 B11 B6 37.59(11) . . . . ?
B8 B7 B11 B6 100.85(12) . . . . ?
B12 B7 B11 B10 36.88(11) . . . . ?
B2 B7 B11 B10 -63.49(14) . . . . ?
B6 B7 B11 B10 -101.08(12) . . . . ?
B8 B7 B11 B10 -0.24(15) . . . . ?
B12 B7 B11 B5 100.50(13) . . . . ?
B2 B7 B11 B5 0.13(16) . . . . ?
B6 B7 B11 B5 -37.46(11) . . . . ?
B8 B7 B11 B5 63.39(15) . . . . ?
B2 B7 B11 B12 -100.38(13) . . . . ?
B6 B7 B11 B12 -137.96(12) . . . . ?
B8 B7 B11 B12 -37.12(11) . . . . ?
B12 B10 B11 B6 -100.77(13) . . . . ?
B4 B10 B11 B6 0.13(16) . . . . ?
B9 B10 B11 B6 -63.62(15) . . . . ?
B5 B10 B11 B6 37.45(11) . . . . ?
B12 B10 B11 B7 -36.93(11) . . . . ?
B4 B10 B11 B7 63.98(14) . . . . ?
B9 B10 B11 B7 0.23(15) . . . . ?
B5 B10 B11 B7 101.30(13) . . . . ?
B12 B10 B11 B5 -138.22(12) . . . . ?
B4 B10 B11 B5 -37.32(11) . . . . ?
B9 B10 B11 B5 -101.07(13) . . . . ?
B4 B10 B11 B12 100.90(13) . . . . ?
B9 B10 B11 B12 37.15(11) . . . . ?
B5 B10 B11 B12 138.22(12) . . . . ?
B1 B5 B11 B6 -38.05(11) . . . . ?
B10 B5 B11 B6 -138.05(13) . . . . ?
B4 B5 B11 B6 -101.07(13) . . . . ?
B1 B5 B11 B7 -0.34(16) . . . . ?
B6 B5 B11 B7 37.70(11) . . . . ?
B10 B5 B11 B7 -100.34(13) . . . . ?
B4 B5 B11 B7 -63.37(15) . . . . ?
B1 B5 B11 B10 100.00(13) . . . . ?
B6 B5 B11 B10 138.05(13) . . . . ?
B4 B5 B11 B10 36.97(11) . . . . ?
B1 B5 B11 B12 62.84(15) . . . . ?
B6 B5 B11 B12 100.88(13) . . . . ?
B10 B5 B11 B12 -37.16(11) . . . . ?
B4 B5 B11 B12 -0.19(16) . . . . ?
B11 B10 B12 B9 138.58(12) . . . . ?
B4 B10 B12 B9 37.27(11) . . . . ?
B5 B10 B12 B9 101.13(13) . . . . ?
B11 B10 B12 B7 36.92(11) . . . . ?
B4 B10 B12 B7 -64.38(15) . . . . ?
B9 B10 B12 B7 -101.66(13) . . . . ?
B5 B10 B12 B7 -0.53(16) . . . . ?
B11 B10 B12 B8 100.99(13) . . . . ?
B4 B10 B12 B8 -0.32(16) . . . . ?
B9 B10 B12 B8 -37.59(11) . . . . ?
B5 B10 B12 B8 63.54(15) . . . . ?
B4 B10 B12 B11 -101.31(13) . . . . ?
B9 B10 B12 B11 -138.58(12) . . . . ?
B5 B10 B12 B11 -37.45(11) . . . . ?
B3 B9 B12 B10 -100.47(13) . . . . ?
B4 B9 B12 B10 -37.16(11) . . . . ?
B8 B9 B12 B10 -138.25(12) . . . . ?
B10 B9 B12 B7 100.25(13) . . . . ?
B3 B9 B12 B7 -0.22(16) . . . . ?
B4 B9 B12 B7 63.09(15) . . . . ?
B8 B9 B12 B7 -38.00(11) . . . . ?
B10 B9 B12 B8 138.25(12) . . . . ?
B3 B9 B12 B8 37.78(11) . . . . ?
B4 B9 B12 B8 101.09(13) . . . . ?
B10 B9 B12 B11 36.99(11) . . . . ?
B3 B9 B12 B11 -63.48(15) . . . . ?
B4 B9 B12 B11 -0.17(16) . . . . ?
B8 B9 B12 B11 -101.26(13) . . . . ?
B11 B7 B12 B10 -36.95(11) . . . . ?
B2 B7 B12 B10 63.86(15) . . . . ?
B6 B7 B12 B10 0.50(16) . . . . ?
B8 B7 B12 B10 101.62(13) . . . . ?
B11 B7 B12 B9 -100.68(13) . . . . ?
B2 B7 B12 B9 0.14(15) . . . . ?
B6 B7 B12 B9 -63.22(15) . . . . ?
B8 B7 B12 B9 37.89(11) . . . . ?
B11 B7 B12 B8 -138.57(12) . . . . ?
B2 B7 B12 B8 -37.76(11) . . . . ?
B6 B7 B12 B8 -101.12(12) . . . . ?
B2 B7 B12 B11 100.81(12) . . . . ?
B6 B7 B12 B11 37.46(11) . . . . ?
B8 B7 B12 B11 138.57(12) . . . . ?
B2 B8 B12 B10 -62.67(15) . . . . ?
B9 B8 B12 B10 37.54(11) . . . . ?
B3 B8 B12 B10 0.21(16) . . . . ?
B7 B8 B12 B10 -100.38(13) . . . . ?
B2 B8 B12 B9 -100.21(12) . . . . ?
B3 B8 B12 B9 -37.34(11) . . . . ?
B7 B8 B12 B9 -137.92(12) . . . . ?
B2 B8 B12 B7 37.71(11) . . . . ?
B9 B8 B12 B7 137.92(12) . . . . ?
B3 B8 B12 B7 100.59(12) . . . . ?
B2 B8 B12 B11 0.70(15) . . . . ?
B9 B8 B12 B11 100.91(13) . . . . ?
B3 B8 B12 B11 63.57(15) . . . . ?
B7 B8 B12 B11 -37.02(11) . . . . ?
B6 B11 B12 B10 100.72(13) . . . . ?
B7 B11 B12 B10 138.49(12) . . . . ?
B5 B11 B12 B10 37.41(11) . . . . ?
B6 B11 B12 B9 63.53(15) . . . . ?
B7 B11 B12 B9 101.30(13) . . . . ?
B10 B11 B12 B9 -37.19(11) . . . . ?
B5 B11 B12 B9 0.22(16) . . . . ?
B6 B11 B12 B7 -37.78(11) . . . . ?
B10 B11 B12 B7 -138.49(12) . . . . ?
B5 B11 B12 B7 -101.08(13) . . . . ?
B6 B11 B12 B8 -0.38(16) . . . . ?
B7 B11 B12 B8 37.39(11) . . . . ?
B10 B11 B12 B8 -101.10(13) . . . . ?
B5 B11 B12 B8 -63.69(15) . . . . ?
 
_refine_diff_density_max    0.366
_refine_diff_density_min   -0.255
_refine_diff_density_rms    0.056

_shelxl_version_number 2014-3

_shelx_res_file
;
TITL Zh104_LT_0m in P2(1)/c
CELL 0.71073  10.1707   26.5124   14.0828  90.000  96.017  90.000
ZERR    4.00   0.0002    0.0006    0.0003   0.000   0.001   0.000
LATT 1
SYMM -X, 0.5+Y, 0.5-Z
SFAC C  H  B  N  O P
UNIT 128  196  48  8  12 4
TEMP -173
SIZE 0.36 0.32 0.20
L.S. 8
BOND $H
FMAP 2
PLAN 20
HTAB
SHEL 5 0.5
OMIT -2 60
ACTA
CONF
WGHT    0.050100    1.129800
FVAR       0.35285
P1    6    0.368965    0.712041    0.651532    11.00000    0.01447    0.01467 =
         0.01417   -0.00012    0.00039    0.00135
O1    5    0.871849    0.641892    0.794524    11.00000    0.02949    0.03950 =
         0.04188   -0.00458   -0.00509   -0.00687
O2    5    1.038436    0.657978    0.909464    11.00000    0.02926    0.03178 =
         0.03365   -0.00231   -0.00479   -0.00419
O3    5    0.970024    0.718132    0.813741    11.00000    0.04044    0.03618 =
         0.05035    0.00631   -0.01289   -0.00904
N1    4    0.443925    0.512807    0.153525    11.00000    0.01550    0.02751 =
         0.01419   -0.00426    0.00059   -0.00095
AFIX  43
H1A   2    0.423652    0.510735    0.091348    11.00000   -1.20000
AFIX   0
N2    4    0.363891    0.506957    0.298609    11.00000    0.01483    0.03145 =
         0.01815   -0.00019    0.00124   -0.00462
AFIX  43
H2D   2    0.442583    0.517165    0.323031    11.00000   -1.20000
AFIX   0
C1    1    0.345775    0.503102    0.204675    11.00000    0.01617    0.01956 =
         0.01902   -0.00237    0.00236    0.00090
C2    1    0.213488    0.488811    0.156474    11.00000    0.01597    0.03439 =
         0.02151   -0.00749    0.00057   -0.00151
AFIX 137
H2A   2    0.217112    0.487853    0.087232    11.00000   -1.50000
H2B   2    0.147687    0.513723    0.171726    11.00000   -1.50000
H2C   2    0.188718    0.455464    0.178782    11.00000   -1.50000
AFIX   0
C3    1    0.267917    0.496184    0.367341    11.00000    0.01758    0.02758 =
         0.02051    0.00251    0.00620   -0.00123
AFIX  13
H3A   2    0.176498    0.501981    0.335683    11.00000   -1.20000
AFIX   0
C4    1    0.280629    0.441615    0.399818    11.00000    0.03245    0.02485 =
         0.03148    0.00175    0.00915   -0.00179
AFIX 137
H4A   2    0.256121    0.419281    0.345380    11.00000   -1.50000
H4B   2    0.221772    0.435494    0.449425    11.00000   -1.50000
H4C   2    0.372197    0.434857    0.425605    11.00000   -1.50000
AFIX   0
C5    1    0.294487    0.532771    0.450290    11.00000    0.03721    0.02804 =
         0.02275   -0.00106    0.01030   -0.00418
AFIX 137
H5A   2    0.283058    0.567445    0.426754    11.00000   -1.50000
H5B   2    0.385200    0.528211    0.480048    11.00000   -1.50000
H5C   2    0.232326    0.526237    0.497526    11.00000   -1.50000
AFIX   0
C6    1    0.952066    0.669338    0.835198    11.00000    0.02152    0.03357 =
         0.03130   -0.00442    0.00404   -0.00254
C7    1    1.036082    0.605486    0.938916    11.00000    0.03360    0.02778 =
         0.02969   -0.00381    0.00342   -0.00057
AFIX 137
H7A   2    1.108108    0.599331    0.989449    11.00000   -1.50000
H7B   2    1.047323    0.583689    0.884148    11.00000   -1.50000
H7C   2    0.951229    0.598036    0.963016    11.00000   -1.50000
AFIX   0
C8    1    0.883062    0.736197    0.732828    11.00000    0.04907    0.05208 =
         0.05295    0.01385   -0.01255   -0.00306
AFIX 137
H8A   2    0.899765    0.772114    0.722846    11.00000   -1.50000
H8B   2    0.790869    0.731477    0.745319    11.00000   -1.50000
H8C   2    0.899726    0.717220    0.675583    11.00000   -1.50000
AFIX   0
C11   1    0.236973    0.678580    0.585454    11.00000    0.01624    0.01792 =
         0.01462   -0.00209   -0.00008    0.00157
C12   1    0.192794    0.694851    0.492604    11.00000    0.02252    0.02318 =
         0.01589    0.00158    0.00032    0.00000
AFIX  43
H12A  2    0.235081    0.722286    0.464811    11.00000   -1.20000
AFIX   0
C13   1    0.087118    0.670574    0.441937    11.00000    0.02428    0.02970 =
         0.01524   -0.00123   -0.00273    0.00260
AFIX  43
H13A  2    0.056402    0.681655    0.379374    11.00000   -1.20000
AFIX   0
C14   1    0.025866    0.630264    0.481772    11.00000    0.02215    0.02895 =
         0.02544   -0.00472   -0.00547   -0.00334
AFIX  43
H14A  2   -0.046878    0.613927    0.446687    11.00000   -1.20000
AFIX   0
C15   1    0.070899    0.613690    0.573220    11.00000    0.02528    0.02506 =
         0.02763    0.00275   -0.00329   -0.00769
AFIX  43
H15A  2    0.029401    0.585778    0.600096    11.00000   -1.20000
AFIX   0
C16   1    0.176244    0.637775    0.625367    11.00000    0.02267    0.02064 =
         0.01854    0.00128   -0.00137   -0.00107
AFIX  43
H16A  2    0.206673    0.626489    0.687850    11.00000   -1.20000
AFIX   0
C21   1    0.315117    0.773719    0.683188    11.00000    0.01769    0.01455 =
         0.01588    0.00086    0.00313    0.00182
C22   1    0.194678    0.793955    0.643929    11.00000    0.01735    0.02216 =
         0.01929    0.00071    0.00046    0.00420
AFIX  43
H22A  2    0.139297    0.775605    0.597604    11.00000   -1.20000
AFIX   0
C23   1    0.156953    0.841457    0.673716    11.00000    0.02148    0.02419 =
         0.02471    0.00276    0.00307    0.00778
AFIX  43
H23A  2    0.074721    0.855494    0.648411    11.00000   -1.20000
AFIX   0
C24   1    0.239635    0.868243    0.740390    11.00000    0.02481    0.01661 =
         0.02923    0.00024    0.00908    0.00316
AFIX  43
H24A  2    0.213799    0.900783    0.759730    11.00000   -1.20000
AFIX   0
C25   1    0.358802    0.848324    0.779015    11.00000    0.02023    0.01889 =
         0.02545   -0.00438    0.00503   -0.00205
AFIX  43
H25A  2    0.414784    0.867160    0.824198    11.00000   -1.20000
AFIX   0
C26   1    0.396380    0.800651    0.751500    11.00000    0.01596    0.01750 =
         0.02133   -0.00002    0.00186    0.00101
AFIX  43
H26A  2    0.477173    0.786357    0.779043    11.00000   -1.20000
AFIX   0
C31   1    0.418436    0.681076    0.762123    11.00000    0.01771    0.01420 =
         0.01443   -0.00100   -0.00186   -0.00103
C32   1    0.332908    0.684473    0.833957    11.00000    0.01899    0.01909 =
         0.01787   -0.00121    0.00034    0.00071
AFIX  43
H32A  2    0.251741    0.702286    0.822560    11.00000   -1.20000
AFIX   0
C33   1    0.367496    0.661778    0.921196    11.00000    0.02655    0.02110 =
         0.01663   -0.00140    0.00190   -0.00110
AFIX  43
H33A  2    0.309826    0.663843    0.969933    11.00000   -1.20000
AFIX   0
C34   1    0.486172    0.635983    0.937851    11.00000    0.03145    0.02089 =
         0.01706    0.00221   -0.00419    0.00049
AFIX  43
H34A  2    0.509466    0.620493    0.998098    11.00000   -1.20000
AFIX   0
C35   1    0.571223    0.632590    0.867316    11.00000    0.02303    0.02343 =
         0.02505    0.00331   -0.00420    0.00596
AFIX  43
H35A  2    0.652387    0.614832    0.879347    11.00000   -1.20000
AFIX   0
C36   1    0.537643    0.655219    0.778830    11.00000    0.01912    0.02014 =
         0.01992   -0.00013    0.00036    0.00295
AFIX  43
H36A  2    0.595631    0.653015    0.730317    11.00000   -1.20000
AFIX   0
C41   1    0.504956    0.716494    0.580000    11.00000    0.01746    0.01792 =
         0.01485    0.00150    0.00080    0.00229
C42   1    0.580490    0.760342    0.578261    11.00000    0.02225    0.01914 =
         0.02492    0.00120    0.00504    0.00171
AFIX  43
H42A  2    0.559465    0.789095    0.613984    11.00000   -1.20000
AFIX   0
C43   1    0.686811    0.761587    0.523784    11.00000    0.02495    0.02451 =
         0.03359    0.00674    0.00705   -0.00133
AFIX  43
H43A  2    0.738474    0.791368    0.522178    11.00000   -1.20000
AFIX   0
C44   1    0.717866    0.719658    0.471826    11.00000    0.02207    0.03328 =
         0.02520    0.00369    0.00887    0.00316
AFIX  43
H44A  2    0.791077    0.720733    0.435159    11.00000   -1.20000
AFIX   0
C45   1    0.642471    0.676111    0.473136    11.00000    0.02602    0.02988 =
         0.02439   -0.00473    0.00806    0.00458
AFIX  43
H45A  2    0.664055    0.647473    0.437305    11.00000   -1.20000
AFIX   0
C46   1    0.535705    0.674322    0.526639    11.00000    0.02232    0.02212 =
         0.02179   -0.00395    0.00379   -0.00020
AFIX  43
H46A  2    0.483576    0.644608    0.527121    11.00000   -1.20000
AFIX   0
B1    3    0.683636    0.547459    0.094252    11.00000    0.01666    0.02001 =
         0.01327   -0.00036    0.00172    0.00316
H1    2    0.633090    0.549825    0.018581    11.00000   -1.20000
B2    3    0.587322    0.527086    0.184870    11.00000    0.01432    0.01933 =
         0.01450   -0.00198    0.00172   -0.00020
B3    3    0.715561    0.487624    0.149525    11.00000    0.01568    0.01858 =
         0.01745   -0.00231    0.00051    0.00133
H3    2    0.691153    0.451401    0.110641    11.00000   -1.20000
B4    3    0.849021    0.527426    0.125154    11.00000    0.01483    0.01894 =
         0.01578    0.00030    0.00286    0.00071
H4    2    0.912697    0.517421    0.069503    11.00000   -1.20000
B5    3    0.802426    0.591410    0.145008    11.00000    0.01958    0.01956 =
         0.01721    0.00283    0.00343    0.00084
H5    2    0.840171    0.625075    0.101503    11.00000   -1.20000
B6    3    0.640903    0.591263    0.182080    11.00000    0.01787    0.01806 =
         0.01492    0.00100    0.00389    0.00320
H6    2    0.567630    0.621043    0.164177    11.00000   -1.20000
B7    3    0.647183    0.558302    0.293259    11.00000    0.01586    0.01872 =
         0.01377   -0.00161    0.00296   -0.00005
H7    2    0.580565    0.568732    0.348565    11.00000   -1.20000
B8    3    0.692397    0.493963    0.273461    11.00000    0.01539    0.01751 =
         0.01663    0.00191    0.00247   -0.00044
H8    2    0.653650    0.462446    0.313477    11.00000   -1.20000
B9    3    0.855234    0.494591    0.236211    11.00000    0.01585    0.01750 =
         0.01678    0.00144    0.00093    0.00190
H9    2    0.929023    0.462821    0.254585    11.00000   -1.20000
B10   3    0.908448    0.558580    0.233348    11.00000    0.01528    0.02009 =
         0.01685    0.00096    0.00235   -0.00128
H10   2    1.016409    0.568827    0.250496    11.00000   -1.20000
B11   3    0.780259    0.597933    0.268192    11.00000    0.01788    0.01739 =
         0.01563   -0.00147    0.00091   -0.00168
H11   2    0.799863    0.635588    0.307068    11.00000   -1.20000
B12   3    0.812663    0.537862    0.324354    11.00000    0.01720    0.01989 =
         0.01423    0.00152   -0.00059   -0.00339
H12   2    0.857360    0.534842    0.400860    11.00000   -1.20000

HKLF 4

REM  Zh104_LT_0m in P2(1)/c
REM R1 =  0.0495 for    7561 Fo > 4sig(Fo)  and  0.0842 for all   10981 data
REM    489 parameters refined using      0 restraints

END

WGHT      0.0499      1.1439

REM No hydrogen bonds found for HTAB generation

REM Highest difference peak  0.366,  deepest hole -0.255,  1-sigma level  0.056
Q1    1   0.2146  0.6846  0.5375  11.00000  0.05    0.37
Q2    1   0.4466  0.7138  0.6212  11.00000  0.05    0.35
Q3    1   0.3747  0.6779  0.7977  11.00000  0.05    0.35
Q4    1   0.6069  0.5403  0.1221  11.00000  0.05    0.34
Q5    1   0.3389  0.7452  0.6855  11.00000  0.05    0.32
Q6    1   0.3925  0.6926  0.7066  11.00000  0.05    0.32
Q7    1   0.5939  0.5413  0.2398  11.00000  0.05    0.31
Q8    1   0.2779  0.8512  0.7778  11.00000  0.05    0.30
Q9    1   0.8364  0.5829  0.2336  11.00000  0.05    0.30
Q10   1   0.1594  0.4994  0.2879  11.00000  0.05    0.29
Q11   1   0.7602  0.4820  0.2042  11.00000  0.05    0.29
Q12   1   0.8782  0.5255  0.1873  11.00000  0.05    0.29
Q13   1   0.2590  0.7861  0.6669  11.00000  0.05    0.29
Q14   1   0.5332  0.6951  0.5626  11.00000  0.05    0.28
Q15   1   0.2706  0.6981  0.6144  11.00000  0.05    0.28
Q16   1   0.5396  0.6410  0.8194  11.00000  0.05    0.27
Q17   1   0.1599  0.6764  0.4586  11.00000  0.05    0.27
Q18   1   0.7808  0.5578  0.1178  11.00000  0.05    0.27
Q19   1   0.6256  0.7629  0.5396  11.00000  0.05    0.27
Q20   1   0.3483  0.7841  0.7227  11.00000  0.05    0.26
;
_shelx_res_checksum   61305

_shelx_hkl_file
;
   1   0   0 -0.8797  0.4123   1
   1   0   0 -1.2132  0.2742   3
  -1   0   0 -1.2341  0.3682   1
  -2   0   0 636.689  21.012   1
   2   0   0 659.736  21.230   1
   3   0   0 968.613  31.838   1
   3   0   0 984.061  31.351   3
  -3   0   0 969.893  31.681   1
   4   0   0 402.597  14.468   3
  -4   0   0 407.696  15.613   1
   4   0   0 399.352  15.729   1
   5   0   0 199.223  10.297   1
   5   0   0 193.836   8.561   3
  -5   0   0 184.189   9.686   1
   6   0   0 216.024   9.848   3
  -6   0   0 223.300  11.598   1
   6   0   0 217.501  11.575   1
   7   0   0 235.297  10.581   3
   7   0   0 225.915  12.794   1
  -7   0   0 207.666  12.058   1
  -8   0   0 5.12275 4.15129   1
   8   0   0 4.41380 3.99958   1
   8   0   0 -2.0825  2.3783   3
   9   0   0 21.2457  4.0517   3
  -9   0   0 17.5439  5.0000   1
   9   0   0 22.6365  5.9689   1
 -10   0   0 33.9503  7.1103   1
  10   0   0 29.2463  6.8562   1
 -11   0   0 31.0905  7.1960   1
  11   0   0 22.0684  6.9492   1
  12   0   0 102.552  12.273   1
 -12   0   0 70.8077 10.4792   1
 -13   0   0 29.3180  8.1443   1
  13   0   0 30.5251  8.0585   1
 -14   0   0 62.3011 11.7576   1
   0  -1   0 -0.0155  0.0473   1
   0  -1   0 0.00287 0.06245   1
   0   1   0 -0.0087  0.0704   1
   0   1   0 -0.0286  0.0482   1
   1  -1   0 -2.5152  0.4971   1
   1  -1   0 -2.7446  0.3105   3
  -1  -1   0 -3.0649  0.3358   1
  -1   1   0 -2.0645  0.4746   1
   1   1   0 -2.9893  0.4115   1
   2  -1   0 44.7843  2.7140   3
   2  -1   0 60.5526  3.7853   1
  -2  -1   0 56.7986  3.3259   1
   2   1   0 48.8259  3.3739   1
   2   1   0 46.0333  2.8654   3
  -2   1   0 54.0125  3.2916   1
   3  -1   0 0.88453 2.10945   1
  -3  -1   0 6.99659 2.13244   1
   3  -1   0 2.54152 1.48338   3
   3   1   0 3.19105 1.69254   3
   3   1   0 0.22339 1.89596   1
  -3   1   0 6.83879 2.06722   1
   4  -1   0 20.9427  3.5117   1
   4  -1   0 17.9548  2.5155   3
  -4  -1   0 15.1855  3.0444   1
  -4   1   0 11.5308  2.6598   1
   4   1   0 16.8978  2.4991   3
   4   1   0 13.2011  3.2116   1
   5  -1   0 204.042  10.593   1
   5  -1   0 201.903   8.932   3
  -5  -1   0 189.384  10.174   1
   5   1   0 217.485   9.228   3
   5   1   0 215.352  10.734   1
  -5   1   0 209.781  10.307   1
  -6  -1   0 1186.81   40.72   1
   6  -1   0 1181.34   40.88   1
   6  -1   0 1141.28   39.04   3
   6   1   0 1198.27   39.32   3
  -6   1   0 1199.31   40.88   1
   6   1   0 1183.07   40.92   1
   7  -1   0 15.0699  3.2198   3
  -7  -1   0 15.1522  4.3327   1
   7  -1   0 12.8140  4.2761   1
  -7   1   0 7.07287 3.66141   1
   7   1   0 8.01001 3.95022   1
   7   1   0 13.1161  3.1290   3
  -8  -1   0 0.70605 3.27735   1
   8  -1   0 2.33976 2.69498   3
   8  -1   0 6.02930 4.09481   1
   8   1   0 5.72717 2.80565   3
   8   1   0 0.35380 3.33501   1
  -8   1   0 -2.3353  3.0445   1
   9  -1   0 24.8083  4.2231   3
   9  -1   0 3.87363 4.24868   1
  -9  -1   0 7.16016 4.02249   1
  -9   1   0 17.6606  5.0705   1
   9   1   0 13.5932  3.6921   3
   9   1   0 19.6633  5.5157   1
  10  -1   0 84.0923 10.2107   1
 -10  -1   0 76.5060  9.8921   1
  10   1   0 56.9943  8.6302   1
 -10   1   0 88.0189 10.4672   1
  11  -1   0 4.65530 4.77157   1
 -11  -1   0 2.18633 4.15763   1
  11   1   0 5.29971 4.63675   1
 -11   1   0 5.97329 4.81880   1
  12  -1   0 -0.6332  4.4963   1
 -12  -1   0 4.68760 4.58687   1
  12   1   0 -5.8902  3.9703   1
 -12   1   0 3.84891 4.34717   1
 -13  -1   0 -3.1907  4.7213   1
 -13   1   0 6.88501 6.11978   1
  13   1   0 1.99910 4.93663   1
 -14  -1   0 16.4188  7.9843   1
 -14   1   0 28.9359  8.7639   1
   0  -2   0 -0.1828  0.1549   5
   0  -2   0 0.01509 0.25499   1
   0   2   0 -0.1124  0.0723   5
   0   2   0 0.06926 0.27656   1
  -1  -2   0 -3.4447  0.5166   1
   1  -2   0 -4.7787  0.5258   1
  -1   2   0 -3.9416  0.5300   1
   1   2   0 -3.8559  0.5721   1
   2  -2   0 1668.21   51.13   1
   2  -2   0 1624.15   51.48   3
   2   2   0 1646.06   51.15   1
  -2   2   0 1672.12   51.06   1
  -3  -2   0 11.5211  2.4071   1
   3  -2   0 10.1615  2.4897   1
   3  -2   0 11.4230  2.0127   3
  -3   2   0 13.3539  2.5683   1
   3   2   0 13.6919  2.2676   3
   3   2   0 12.0068  2.7872   1
   4  -2   0 16.6235  2.5042   3
   4  -2   0 16.5699  3.2789   1
  -4  -2   0 10.4389  2.6827   1
  -4   2   0 16.3829  2.9716   1
   4   2   0 12.3731  3.0461   1
   4   2   0 16.6044  2.5995   3
  -5  -2   0 46.6183  5.2497   1
   5  -2   0 60.8076  6.0002   1
   5  -2   0 55.1742  4.3670   3
  -5   2   0 50.5280  5.4338   1
   5   2   0 56.2368  4.5427   3
   5   2   0 55.6041  5.9401   1
  -6  -2   0 8.39681 3.09233   1
   6  -2   0 11.8038  3.7966   1
   6  -2   0 9.72532 2.72794   3
   6   2   0 11.8941  3.6176   1
  -6   2   0 9.86993 3.57866   1
   6   2   0 12.1267  2.9884   3
   7  -2   0 136.742   7.699   3
  -7  -2   0 139.041   9.734   1
   7  -2   0 148.406   9.749   1
   7   2   0 145.825   9.773   1
   7   2   0 129.829   7.875   3
  -7   2   0 135.513   9.421   1
   8  -2   0 65.0190  6.0582   3
  -8  -2   0 63.9465  8.1452   1
   8  -2   0 53.7149  7.4033   1
  -8   2   0 62.9309  7.8084   1
   8   2   0 62.0536  8.0509   1
   8   2   0 68.2119  6.3259   3
   9  -2   0 12.2235  3.5955   3
  -9  -2   0 16.6463  5.1386   1
   9  -2   0 17.6557  5.4511   1
   9   2   0 21.1673  4.1183   3
   9   2   0 7.23891 4.64999   1
  -9   2   0 11.1673  4.5413   1
  10  -2   0 2.30628 4.23734   1
 -10  -2   0 7.81066 4.48772   1
  10   2   0 2.01463 4.36086   1
 -10   2   0 -3.0259  3.6276   1
 -11  -2   0 2.70836 4.25520   1
  11  -2   0 4.65533 4.65639   1
 -11   2   0 9.72194 5.15662   1
  11   2   0 11.4712  5.5341   1
  12  -2   0 5.59413 4.93325   1
 -12  -2   0 7.38069 4.87348   1
  12   2   0 1.75023 4.78932   1
 -12   2   0 8.51268 5.15911   1
 -13  -2   0 -0.8821  5.1781   1
  13   2   0 3.15351 5.10672   1
 -13   2   0 -5.3989  4.5597   1
 -14  -2   0 37.7208  9.7006   1
 -14   2   0 17.4326  7.6225   1
   0  -3   0 -11.693   0.471   1
   0  -3   0 -11.724   0.382   5
   0   3   0 -11.741   0.486   1
   0   3   0 -11.607   0.326   5
   2  -3   0 573.870  19.372   1
  -2  -3   0 596.186  19.398   1
   2   3   0 575.069  19.403   1
  -2   3   0 566.517  19.266   1
  -3  -3   0 45.0132  4.2099   1
   3  -3   0 50.7052  4.2257   1
   3   3   0 46.5716  3.9331   3
  -3   3   0 54.1988  4.5406   1
   3   3   0 56.0705  4.4098   1
   4  -3   0 492.634  17.839   3
   4  -3   0 503.915  19.093   1
  -4  -3   0 525.051  19.105   1
   4   3   0 521.681  18.323   3
   4   3   0 516.712  19.264   1
  -4   3   0 512.163  19.069   1
  -5  -3   0 803.925  29.304   1
   5  -3   0 868.257  29.680   1
   5  -3   0 818.038  28.045   3
   5   3   0 826.909  28.503   3
   5   3   0 866.058  29.826   1
  -5   3   0 808.646  29.387   1
  -6  -3   0 154.527   9.301   1
   6  -3   0 140.805   8.937   1
   6  -3   0 143.710   7.579   3
   6   3   0 137.321   7.800   3
   6   3   0 121.373   8.951   1
  -6   3   0 138.041   9.192   1
   7  -3   0 100.001   9.163   1
  -7  -3   0 94.6229  8.9296   1
   7  -3   0 91.3376  6.2471   3
   7   3   0 82.6919  7.0043   3
   7   3   0 86.4150  8.7182   1
  -7   3   0 84.5592  8.6362   1
  -8  -3   0 156.197  11.264   1
   8  -3   0 175.954  11.537   1
   8   3   0 170.373   9.534   3
   8   3   0 153.811  11.360   1
  -8   3   0 164.062  11.546   1
  -9  -3   0 11.7683  4.7559   1
   9  -3   0 5.58901 4.08497   1
   9   3   0 5.72319 3.36181   3
   9   3   0 4.32364 4.24916   1
  -9   3   0 6.31569 4.14791   1
 -10  -3   0 33.6525  7.0355   1
  10  -3   0 30.1001  6.9190   1
 -10   3   0 20.3144  6.0511   1
  10   3   0 18.2199  5.8091   1
  11  -3   0 -2.7367  3.7703   1
 -11  -3   0 0.50078 3.83363   1
  11   3   0 1.41155 4.46808   1
 -11   3   0 -0.6161  3.7795   1
 -12  -3   0 5.74662 5.02778   1
  12  -3   0 5.86562 5.01957   1
 -12   3   0 6.39548 4.99870   1
  12   3   0 4.70281 5.14721   1
 -13  -3   0 9.01127 5.88702   1
 -13   3   0 15.5152  7.2282   1
 -14  -3   0 -0.6542  5.6647   1
 -14   3   0 -0.3071  5.5469   1
   1  -4   0 1738.14   50.58   1
  -1  -4   0 1714.55   50.55   1
  -1   4   0 1501.09   50.41   1
   1   4   0 1627.70   50.58   1
  -2  -4   0 2481.75   76.99   1
   2  -4   0 2601.69   77.23   1
  -2  -4   0 2488.42   77.04   1
   2   4   0 2480.55   77.13   1
  -2   4   0 2541.85   77.11   1
   3  -4   0 518.102  18.603   1
  -3  -4   0 539.264  18.709   1
   3   4   0 493.242  18.686   1
  -3   4   0 538.763  18.662   1
  -4  -4   0 191.142   9.459   1
   4  -4   0 199.399   9.596   1
   4   4   0 195.992   8.947   3
  -4   4   0 190.318   9.406   1
   4   4   0 207.577   9.937   1
  -5  -4   0 118.429   7.294   1
   5  -4   0 117.436   7.764   1
   5   4   0 98.0466  7.4069   1
  -5   4   0 105.950   7.098   1
   5   4   0 101.371   6.534   3
  -6  -4   0 11.6412  3.6774   1
   6  -4   0 12.2273  3.9684   1
  -6   4   0 12.0446  3.6242   1
   6   4   0 19.9621  4.4731   1
   6   4   0 15.9409  3.5377   3
   7  -4   0 159.362  10.323   1
  -7  -4   0 154.057  10.125   1
  -7   4   0 165.140  10.389   1
   7   4   0 152.371  10.628   1
   7   4   0 150.824   8.930   3
   8  -4   0 1.46336 3.77730   1
  -8  -4   0 -4.4263  3.0471   1
   8   4   0 -2.8549  3.5141   1
   8   4   0 2.34358 2.93169   3
  -8   4   0 2.96132 3.74916   1
   9  -4   0 -1.0741  3.7113   1
  -9  -4   0 5.11352 3.66510   1
   9   4   0 4.19046 3.42101   3
  -9   4   0 3.25922 3.95705   1
   9   4   0 -2.0349  3.4960   1
 -10  -4   0 54.2490  8.5721   1
  10  -4   0 54.7051  8.4194   1
  10   4   0 56.2558  9.0637   1
 -10   4   0 67.7919  9.3715   1
  11  -4   0 9.13103 5.23036   1
 -11  -4   0 1.77449 4.26352   1
  11   4   0 2.79535 4.78335   1
 -11   4   0 3.04448 4.23229   1
  12  -4   0 11.8305  5.4541   1
 -12  -4   0 0.35597 4.31854   1
 -12   4   0 2.33402 4.74110   1
  12   4   0 12.0558  5.9457   1
 -13  -4   0 -1.7478  4.6452   1
 -13   4   0 2.97932 5.47059   1
  13   4   0 1.07188 5.09272   1
 -14  -4   0 53.9026 11.1830   1
 -14   4   0 36.3926  9.1997   1
   0  -5   0 0.50738 1.18400   1
   0  -5   0 0.34917 0.96505   5
   0   5   0 -0.2834  0.8004   5
   0   5   0 2.08829 1.34382   1
  -1  -5   0 3439.32  106.21   5
  -1  -5   0 3348.73  102.30   1
   1  -5   0 3409.44  102.36   1
   1   5   0 3359.31  106.19   5
   1   5   0 3311.32  102.41   1
  -1   5   0 3424.05  102.43   1
  -2  -5   0 438.267  15.424   1
   2  -5   0 432.265  15.483   1
  -2   5   0 416.527  15.401   1
   2   5   0 440.495  15.576   1
   3  -5   0 3.54964 2.30176   1
  -3  -5   0 3.73676 1.95368   1
   3   5   0 5.51586 2.47080   1
  -3   5   0 3.72296 2.15589   1
  -4  -5   0 64.8369  5.1764   1
   4  -5   0 77.8884  5.5739   1
  -4   5   0 74.1150  5.8300   1
   4   5   0 64.7432  6.0265   1
   5  -5   0 4.63227 2.71717   1
  -5  -5   0 9.70198 2.95107   1
  -5   5   0 14.0307  3.2925   1
   5   5   0 14.6598  3.1378   3
   5   5   0 14.0043  3.6034   1
  -6  -5   0 312.778  14.684   1
   6  -5   0 285.345  14.294   1
   6   5   0 308.116  14.509   1
  -6   5   0 301.854  14.501   1
   6   5   0 295.170  13.194   3
   7  -5   0 6.04373 3.83560   1
  -7  -5   0 -0.6042  2.9378   1
  -7   5   0 -3.4083  2.8649   1
   7   5   0 8.23217 4.02512   1
   7   5   0 2.48885 2.97133   3
  -8  -5   0 15.0148  5.0645   1
   8  -5   0 15.1513  4.9526   1
  -8   5   0 34.8983  6.2083   1
   8   5   0 34.2273  5.0537   3
   8   5   0 13.3039  4.8917   1
  -9  -5   0 19.6189  5.2439   1
   9  -5   0 19.7576  5.6126   1
  -9   5   0 25.4451  6.0113   1
   9   5   0 18.9975  4.5423   3
   9   5   0 16.6312  5.1545   1
 -10  -5   0 0.55623 3.84091   1
  10  -5   0 8.57906 4.81065   1
  10   5   0 6.67477 5.32062   1
 -10   5   0 4.52247 4.43177   1
 -11  -5   0 21.2809  6.5791   1
  11  -5   0 7.74585 4.69344   1
 -11   5   0 9.29709 5.06360   1
  11   5   0 6.54388 5.28190   1
 -12  -5   0 3.44557 4.93423   1
  12  -5   0 8.67213 5.47251   1
 -12   5   0 6.38587 5.16961   1
  12   5   0 2.00805 4.90126   1
 -13  -5   0 70.9223 11.7500   1
 -13   5   0 91.4543 13.2106   1
 -14  -5   0 -1.0011  5.2442   1
 -14   5   0 -2.2293  5.2305   1
   0  -6   0 7773.23  234.94   1
   0  -6   0 7872.83  246.90   5
   0   6   0 7810.98  235.04   1
   0   6   0 7942.48  247.07   5
   1  -6   0 534.372  18.181   1
  -1  -6   0 518.863  18.200   1
  -1  -6   0 521.182  18.661   5
   1   6   0 541.826  18.400   1
  -1   6   0 537.732  18.271   1
   1   6   0 553.390  18.790   5
  -2  -6   0 8.99828 2.14525   1
   2  -6   0 7.77213 2.24158   1
   2   6   0 6.60248 2.11278   5
  -2   6   0 4.39511 2.03230   1
   2   6   0 8.31407 2.35532   1
  -3  -6   0 57.3442  5.1002   1
   3  -6   0 63.1015  4.9663   1
   3  -6   0 62.9275  2.8208   2
  -3  -6   0 74.6802  5.1898   1
   3   6   0 63.1493  4.9999   1
  -3   6   0 67.2758  5.2165   1
   4  -6   0 137.989   7.808   1
  -4  -6   0 145.224   8.042   1
  -4   6   0 133.667   7.994   1
   4   6   0 133.850   7.862   1
   5  -6   0 52.3714  5.7176   1
  -5  -6   0 58.5524  6.1000   1
   5   6   0 66.1340  6.6586   1
  -5   6   0 57.8629  6.1224   1
   5   6   0 59.5438  5.5309   3
  -6  -6   0 22.7932  4.5495   1
   6  -6   0 18.9219  4.2236   1
   6   6   0 21.0319  4.7002   1
  -6   6   0 24.6907  4.8009   1
   6   6   0 25.9638  4.1960   3
   7  -6   0 -7.5926  2.5911   1
  -7  -6   0 1.40481 3.19245   1
   7   6   0 -0.3633  2.7372   3
   7   6   0 7.55592 3.68672   1
  -7   6   0 4.37157 3.24749   1
   8  -6   0 2.81405 3.78043   1
  -8  -6   0 1.65576 3.34459   1
   8   6   0 3.63508 3.34524   3
  -8   6   0 4.14012 3.53571   1
   8   6   0 5.24935 4.07565   1
  -9  -6   0 -0.2180  3.3124   1
   9  -6   0 1.68949 3.92523   1
  -9   6   0 1.57013 3.43859   1
   9   6   0 10.6730  3.8064   3
   9   6   0 4.95713 4.17791   1
 -10  -6   0 200.585  14.049   1
  10  -6   0 190.074  13.943   1
  10   6   0 199.137  12.014   3
 -10   6   0 214.808  14.761   1
  10   6   0 233.474  15.125   1
 -11  -6   0 4.06756 5.03547   1
  11  -6   0 4.34690 4.61925   1
  11   6   0 10.5845  5.5093   1
 -11   6   0 5.60375 4.57117   1
 -12  -6   0 9.89471 5.91507   1
  12  -6   0 -3.7821  4.0755   1
  12   6   0 5.97634 5.16835   1
 -12   6   0 1.64412 4.85135   1
 -13  -6   0 -2.6625  4.5374   1
 -13   6   0 2.60887 5.95126   1
 -14  -6   0 -1.6980  5.3190   1
 -14   6   0 11.9704  6.5331   1
   0  -7   0 -4.2054  1.5483   1
   0  -7   0 0.43111 1.39229   5
   0   7   0 -5.1544  1.4727   1
   0   7   0 -0.1378  1.4297   5
   0   7   0 -0.2093  0.6681   4
   1  -7   0 1140.50   36.40   1
  -1  -7   0 1062.29   37.38   5
  -1  -7   0 1150.65   36.47   1
   1   7   0 1180.63   36.66   1
   1   7   0 1166.72   37.67   5
  -1   7   0 1124.16   36.49   1
  -2  -7   0 435.893  16.058   1
   2  -7   0 429.471  15.926   1
   2   7   0 427.434  16.096   1
   2   7   0 450.049  16.715   5
  -2   7   0 441.853  16.218   1
  -3  -7   0 3.44422 2.20583   1
   3  -7   0 0.69933 2.11942   1
  -3  -7   0 1.93968 1.97799   1
  -3   7   0 1.08182 1.96009   1
   3   7   0 2.37186 2.09268   1
   4  -7   0 18.3519  3.6984   1
  -4  -7   0 20.9751  3.7098   1
  -4   7   0 25.5666  4.0765   1
   4   7   0 22.0265  3.9593   1
  -5  -7   0 51.5371  5.7193   1
   5  -7   0 36.0937  5.0457   1
  -5   7   0 37.5772  5.2132   1
   5   7   0 34.4163  5.1997   1
  -6  -7   0 3.59009 3.04400   1
   6  -7   0 -5.1840  2.3863   1
   6   7   0 4.49636 3.35078   1
  -6   7   0 4.54781 3.19498   1
   6   7   0 0.74102 2.74442   3
   7  -7   0 56.2136  7.0812   1
  -7  -7   0 63.2194  7.5966   1
  -7   7   0 58.8467  7.3948   1
   7   7   0 50.0181  6.9812   1
   7   7   0 52.2664  6.0939   3
   8  -7   0 -0.6757  3.4911   1
  -8  -7   0 -0.4682  3.3590   1
  -8   7   0 6.08442 4.14471   1
   8   7   0 -3.1779  3.5121   1
   8   7   0 4.42905 3.61415   3
  -9  -7   0 36.1517  6.7304   1
   9  -7   0 33.3426  6.8363   1
  -9   7   0 33.1704  6.4469   1
   9   7   0 33.9528  6.7880   1
   9   7   0 35.4547  5.7341   3
  10  -7   0 25.9539  6.3783   1
 -10  -7   0 20.8689  6.0137   1
  10   7   0 24.6587  5.4107   3
  10   7   0 18.2101  6.4346   1
 -10   7   0 26.6844  6.3341   1
  11  -7   0 5.20265 4.52127   1
 -11  -7   0 4.48453 4.42499   1
  11   7   0 0.67891 4.78794   1
 -11   7   0 2.21953 4.21292   1
  12  -7   0 6.07730 5.45160   1
 -12  -7   0 13.2432  6.0886   1
  12   7   0 30.7210  7.8823   1
 -12   7   0 10.9876  6.0587   1
 -13  -7   0 10.9821  6.4382   1
 -13   7   0 9.19636 6.19674   1
   0  -8   0 737.524  25.382   5
   0  -8   0 753.431  25.073   1
   0   8   0 746.533  25.218   1
   0   8   0 752.617  25.476   5
   1  -8   0 45.8677  4.1280   1
  -1  -8   0 48.0725  3.9627   1
  -1  -8   0 42.2966  3.6001   5
  -1   8   0 46.8627  4.3330   1
   1   8   0 45.9187  4.2624   1
   1   8   0 44.7101  3.7200   5
   2  -8   0 16.0315  2.8100   1
  -2  -8   0 20.6407  3.2412   1
   2   8   0 15.4756  2.8577   5
   2   8   0 16.7261  2.9903   1
  -2   8   0 17.5819  3.1613   1
  -3  -8   0 189.981   9.587   1
   3  -8   0 207.035   9.908   1
  -3   8   0 200.136   9.691   1
   3   8   0 224.845  10.149   1
  -4  -8   0 23.6281  3.9568   1
   4  -8   0 47.7778  5.2376   1
  -4   8   0 53.8023  5.4427   1
   4   8   0 39.4912  5.0647   1
   5  -8   0 54.1470  6.1583   1
  -5  -8   0 51.5364  5.7935   1
  -5   8   0 54.2261  6.0831   1
   5   8   0 55.4846  6.3324   1
   6  -8   0 1.23100 2.96673   1
  -6  -8   0 1.71365 2.62989   1
  -6   8   0 1.36661 2.73465   1
   6   8   0 -3.0545  2.5964   3
   6   8   0 -0.4666  2.7224   1
   7  -8   0 210.059  12.451   1
  -7  -8   0 227.260  12.805   1
   7   8   0 217.717  11.817   3
  -7   8   0 200.686  12.661   1
   7   8   0 230.334  13.440   1
   8  -8   0 7.96554 4.21850   1
  -8  -8   0 4.93562 4.08864   1
   8   8   0 -0.1961  3.2595   3
  -8   8   0 5.86952 4.02441   1
   8   8   0 1.54590 3.53696   1
  -9  -8   0 3.64530 3.72932   1
   9  -8   0 3.35141 4.26928   1
  -9   8   0 11.0745  4.7234   1
   9   8   0 9.56145 4.20476   3
   9   8   0 0.91963 3.53328   1
 -10  -8   0 16.4304  5.7005   1
  10  -8   0 11.5060  5.2556   1
 -10   8   0 21.6842  6.2315   1
  10   8   0 18.4259  5.1885   3
  10   8   0 16.2934  6.2819   1
 -11  -8   0 42.4996  7.9907   1
  11  -8   0 45.6690  8.4370   1
  11   8   0 37.7202  8.1890   1
 -11   8   0 30.8090  7.6830   1
 -12  -8   0 10.3863  5.5192   1
  12  -8   0 3.18052 5.29361   1
  12   8   0 -0.4853  5.1246   1
 -12   8   0 1.58777 4.66214   1
 -13  -8   0 8.08253 5.65220   1
 -13   8   0 2.56191 5.50346   1
   0  -9   0 0.45317 1.38051   5
   0  -9   0 -1.2725  1.6809   1
   0   9   0 1.14504 1.51927   5
   0   9   0 -0.8638  1.8177   1
  -1  -9   0 127.862   4.796   4
  -1  -9   0 132.919   6.753   5
   1  -9   0 133.648   6.860   1
   1  -9   0 128.554   6.335   5
  -1  -9   0 116.338   6.578   1
  -1   9   0 136.975   7.029   1
   1   9   0 115.452   6.516   5
   1   9   0 124.624   7.061   1
  -2  -9   0 3.55684 2.29737   1
   2  -9   0 4.19266 2.32968   1
  -2   9   0 11.2176  2.6968   1
   2   9   0 6.02583 2.41862   1
   2   9   0 5.61811 2.21180   5
  -3  -9   0 316.845  13.022   1
   3  -9   0 280.967  12.711   1
   3   9   0 294.608  12.977   1
   3   9   0 304.896  13.438   5
  -3   9   0 288.668  12.941   1
   4  -9   0 366.307  15.615   1
  -4  -9   0 386.328  15.805   1
   4  -9   0 364.436  12.372   2
  -4  -9   0 360.644  15.473   1
   4   9   0 378.401  16.521   5
   4   9   0 375.092  15.964   1
  -4   9   0 374.891  15.862   1
   5  -9   0 99.4069  7.2324   1
  -5  -9   0 76.4066  6.5491   1
  -5   9   0 89.1967  7.3514   1
   5   9   0 85.1976  7.9541   1
   6  -9   0 -1.8686  2.8435   1
  -6  -9   0 2.59572 2.92542   1
  -6   9   0 -1.6548  2.8099   1
   6   9   0 8.32958 3.39705   3
   6   9   0 7.18201 3.74307   1
   7  -9   0 131.780   9.985   1
  -7  -9   0 108.519   9.095   1
   7   9   0 94.2128  9.6466   1
  -7   9   0 123.453   9.397   1
   7   9   0 108.859   8.398   3
  -8  -9   0 6.63837 4.27690   1
   8  -9   0 15.4193  4.9230   1
  -8   9   0 3.95591 3.76529   1
   8   9   0 14.4523  5.0934   1
   8   9   0 12.3561  4.4562   3
  -9  -9   0 91.2172 10.4984   1
   9  -9   0 110.827  11.312   1
   9   9   0 119.764   9.433   3
   9   9   0 101.284  11.018   1
  -9   9   0 102.972  11.087   1
  10  -9   0 46.5636  8.1092   1
 -10  -9   0 40.3740  7.7148   1
 -10   9   0 36.7349  7.6371   1
  10   9   0 41.3368  6.6559   3
  10   9   0 55.4226  8.7251   1
 -11  -9   0 3.38958 4.24090   1
  11  -9   0 -1.1230  4.3269   1
 -11   9   0 -3.0353  4.0115   1
  11   9   0 1.27398 4.54928   1
 -12  -9   0 12.8264  5.9386   1
  12  -9   0 6.86388 5.78776   1
  12   9   0 20.7813  7.1375   1
 -12   9   0 5.45618 5.45488   1
 -13  -9   0 15.0159  6.9038   1
 -13   9   0 11.5233  6.7064   1
   0 -10   0 134.165   7.256   1
   0 -10   0 129.300   6.598   5
   0  10   0 134.299   7.214   1
   0  10   0 127.911   6.602   5
  -1 -10   0 74.9318  4.8915   5
   1 -10   0 75.6489  4.7676   5
   1 -10   0 70.4231  5.3747   1
  -1 -10   0 72.0556  5.1860   1
  -1  10   0 74.3937  5.3775   1
   1  10   0 72.9442  5.0928   5
   1  10   0 67.2905  5.5505   1
  -2 -10   0 222.100  10.602   1
   2 -10   0 247.183  10.766   1
  -2  10   0 240.850  10.787   1
   2  10   0 234.653  10.806   5
   2  10   0 219.300  10.647   1
  -3 -10   0 65.5177  6.0282   1
   3 -10   0 71.2108  5.6162   1
  -3  10   0 81.1171  5.9713   1
   3  10   0 50.5076  5.5608   1
   3  10   0 65.9979  5.5399   5
   4 -10   0 20.1477  3.8252   1
  -4 -10   0 22.1868  4.1044   1
  -4 -10   0 22.0519  4.0730   1
   4  10   0 21.3730  4.2255   1
   4  10   0 23.2931  4.1015   5
  -4  10   0 24.8126  4.2088   1
   5 -10   0 351.006  16.399   1
  -5 -10   0 377.547  16.744   1
   5  10   0 365.647  16.731   1
  -5  10   0 390.388  16.816   1
   6 -10   0 3.42826 3.00659   1
  -6 -10   0 0.12970 2.95037   1
  -6  10   0 -0.1494  2.6074   1
   6  10   0 4.81094 3.44483   1
  -7 -10   0 198.272  12.420   1
   7 -10   0 183.605  12.174   1
   7  10   0 191.534  12.528   1
   7  10   0 204.879  11.753   3
  -7  10   0 195.806  12.296   1
  -8 -10   0 29.2244  5.7343   1
   8 -10   0 43.1861  7.0116   1
   8  10   0 33.8560  6.6234   1
   8  10   0 28.5108  5.5543   3
  -8  10   0 26.8882  6.0724   1
  -9 -10   0 4.02175 4.02853   1
   9 -10   0 8.28311 4.73049   1
   9  10   0 0.83673 3.86931   3
  -9  10   0 2.19085 3.93811   1
   9  10   0 1.07158 4.24111   1
 -10 -10   0 -2.7381  3.0556   1
  10 -10   0 2.68304 4.25027   1
  10  10   0 0.43434 3.96873   3
  10  10   0 0.80244 4.35330   1
 -10  10   0 -2.0255  3.7611   1
  11 -10   0 10.8506  5.4338   1
 -11 -10   0 13.1586  5.2977   1
 -11  10   0 22.2799  6.6044   1
  11  10   0 15.7116  5.9581   1
 -12 -10   0 62.6792 10.2466   1
  12 -10   0 44.4310  8.8366   1
 -12  10   0 38.3058  8.8426   1
  12  10   0 40.5273  8.7731   1
 -13 -10   0 -2.3271  4.7335   1
 -13  10   0 5.83985 6.02324   1
   0 -11   0 -1.2352  1.8452   1
   0 -11   0 -0.7570  1.3597   5
   0  11   0 -1.0784  2.0938   1
   0  11   0 2.13172 1.70503   5
   1 -11   0 746.437  26.678   1
  -1 -11   0 761.167  26.727   1
  -1 -11   0 776.624  27.221   5
   1 -11   0 771.044  26.851   5
  -1  11   0 775.882  27.030   1
   1  11   0 773.094  27.067   1
   1  11   0 771.089  27.379   5
   2 -11   0 655.282  23.317   1
  -2 -11   0 623.957  23.083   1
   2  11   0 659.978  23.620   1
   2  11   0 599.481  23.621   5
  -2  11   0 655.843  23.512   1
  -3 -11   0 150.933   8.667   1
   3 -11   0 151.494   8.929   1
  -3  11   0 163.771   9.014   1
   3  11   0 151.330   8.903   5
   3  11   0 177.053   9.567   1
  -4 -11   0 13.1968  3.3607   1
  -4 -11   0 5.88160 2.87233   1
   4 -11   0 13.0615  3.4630   1
   4  11   0 7.94589 2.93069   5
   4  11   0 8.13853 3.26141   1
  -4  11   0 10.9428  3.2374   1
   5 -11   0 6.39497 3.16090   1
  -5 -11   0 2.87380 3.02723   1
   5  11   0 0.48496 2.83198   1
   5  11   0 5.91425 2.98933   5
  -5  11   0 6.34822 3.31721   1
  -6 -11   0 -1.4736  2.8887   1
   6 -11   0 -4.7997  2.7393   1
  -6  11   0 1.92044 3.31624   1
   6  11   0 -0.2746  2.5932   5
   6  11   0 -2.3995  3.2533   1
  -7 -11   0 0.67441 3.25264   1
   7 -11   0 -1.7082  3.0093   1
   7  11   0 1.28439 3.34142   3
  -7  11   0 2.83399 3.72950   1
   7  11   0 -3.9160  2.8645   1
   8 -11   0 30.7203  6.0546   1
  -8 -11   0 49.5737  7.4291   1
  -8  11   0 32.0303  6.5565   1
   8  11   0 42.5705  7.2747   1
   8  11   0 50.0732  6.9328   3
  -9 -11   0 2.77831 4.04503   1
   9 -11   0 -7.7419  2.7925   1
   9  11   0 0.95273 3.93498   3
   9  11   0 -1.4410  3.8848   1
  -9  11   0 -2.7023  3.2910   1
 -10 -11   0 49.0079  8.3383   1
  10 -11   0 52.4898  8.4423   1
  10  11   0 45.0114  7.3235   3
 -10  11   0 37.1163  7.7758   1
  10  11   0 49.9683  8.5982   1
 -11 -11   0 41.1306  8.6028   1
  11 -11   0 30.1149  7.6189   1
  11  11   0 19.4772  6.4852   1
 -11  11   0 35.7280  8.1664   1
  12 -11   0 8.34334 5.49975   1
 -12 -11   0 12.8337  6.3675   1
  12  11   0 11.6535  6.5887   1
 -12  11   0 9.79426 6.42299   1
 -13 -11   0 11.7039  6.6500   1
 -13  11   0 24.4002  7.3055   1
   0 -12   0 4.45895 2.22886   1
   0 -12   0 3.21820 1.76493   5
   0  12   0 1.24021 2.09412   1
   0  12   0 5.26113 2.07346   5
   1 -12   0 -0.8168  1.7836   1
  -1 -12   0 2.42717 1.70644   5
   1 -12   0 -0.6236  1.3417   5
  -1 -12   0 -2.3515  1.5831   1
  -1  12   0 -1.6067  2.0514   1
   1  12   0 -2.0833  1.4452   5
   1  12   0 -0.1602  2.0617   1
  -2 -12   0 2.17849 2.16095   1
   2 -12   0 6.11993 2.58058   1
   2  12   0 4.85830 2.32556   5
  -2  12   0 4.10228 2.34475   1
   2  12   0 4.95970 2.66027   1
  -3 -12   0 41.4143  5.2759   1
   3 -12   0 42.3908  5.0879   1
   3  12   0 28.5956  4.4102   5
  -3  12   0 51.6836  5.7743   1
   3  12   0 36.7849  5.0318   1
   4 -12   0 21.8311  4.2844   1
  -4 -12   0 13.6564  3.8064   1
   4  12   0 16.8421  4.2637   1
  -4  12   0 19.5121  4.2150   1
   4  12   0 21.1612  4.1669   5
  -5 -12   0 40.2173  5.6128   1
   5 -12   0 39.5384  5.8955   1
  -5 -12   0 38.5767  5.6411   1
   5 -12   0 43.0343  2.8323   2
  -5  12   0 34.7150  5.5172   1
   5  12   0 35.0719  5.5464   5
   5  12   0 37.0856  5.9670   1
   6 -12   0 22.4986  5.0120   1
  -6 -12   0 17.7183  4.7761   1
  -6  12   0 -0.5406  3.5512   1
   6  12   0 15.6247  4.7712   1
   6  12   0 14.0199  4.2577   5
  -7 -12   0 -0.6356  3.2828   1
   7 -12   0 6.09361 3.85916   1
   7  12   0 4.71499 4.03827   1
  -7  12   0 8.44343 4.15291   1
   7  12   0 8.92260 4.19007   3
   7  12   0 4.31118 3.41578   5
  -8 -12   0 21.9209  5.4106   1
   8 -12   0 22.1254  5.4878   1
   8  12   0 10.4025  5.0864   1
  -8  12   0 17.6613  5.1867   1
   8  12   0 24.3697  5.4884   3
   8  12   0 18.7774  5.4040   5
  -9 -12   0 77.7742  9.8945   1
   9 -12   0 86.6783 10.3743   1
   9  12   0 76.5012 10.0041   5
   9  12   0 81.4637 10.1162   1
   9  12   0 76.7366  8.8779   3
  -9  12   0 71.7490  9.5542   1
  10 -12   0 142.547  13.672   1
 -10 -12   0 124.375  13.157   1
 -10  12   0 127.286  13.321   1
  10  12   0 113.750  11.275   3
  10  12   0 109.568  12.519   1
 -11 -12   0 0.28292 4.56958   1
  11 -12   0 -3.0425  4.5114   1
  11  12   0 -3.8524  4.1561   1
 -11  12   0 0.47242 5.00640   1
 -12 -12   0 -0.5025  5.0181   1
  12 -12   0 5.24807 5.11001   1
  12  12   0 0.45277 5.22551   1
 -12  12   0 1.21499 5.68024   1
 -13 -12   0 -8.5172  4.8301   1
 -13  12   0 -1.1403  5.0389   1
   0 -13   0 -2.5335  1.8202   1
   0 -13   0 3.07211 1.76228   5
   0  13   0 -1.6918  1.9167   1
   0  13   0 0.42766 1.72818   5
   1 -13   0 9.01479 2.33646   5
  -1 -13   0 11.7959  3.0657   1
   1 -13   0 9.08682 2.87900   1
  -1 -13   0 13.0859  2.6635   5
   1  13   0 12.7693  3.4405   1
  -1  13   0 8.55285 2.95904   1
   1  13   0 11.3371  2.7005   5
   2 -13   0 37.2985  4.0531   5
   2 -13   0 33.5212  4.6310   1
  -2 -13   0 30.7713  2.6168   4
  -2 -13   0 25.6479  4.0553   1
   2  13   0 34.9401  4.5455   5
  -2  13   0 31.7763  4.5390   1
   2  13   0 32.4604  4.7526   1
  -3 -13   0 23.7949  4.2151   1
   3 -13   0 27.8580  4.4514   1
  -3  13   0 26.5753  4.4466   1
   3  13   0 23.1515  4.0996   5
   3  13   0 19.1200  4.0725   1
  -4 -13   0 376.562  16.975   1
   4 -13   0 387.757  17.095   1
   4  13   0 388.677  17.600   5
   4  13   0 377.601  17.083   1
  -4  13   0 386.421  17.273   1
  -5 -13   0 99.5628  7.9516   1
   5 -13   0 102.423   4.988   2
  -5 -13   0 78.9127  8.1385   1
   5 -13   0 81.7508  8.1669   1
  -5  13   0 118.160   8.694   1
   5  13   0 111.962   8.393   1
   5  13   0 99.7808  8.1846   5
  -6 -13   0 576.247  23.933   1
   6 -13   0 557.837  23.645   1
   6  13   0 538.608  23.763   1
  -6  13   0 570.025  24.121   1
   6  13   0 526.870  24.413   5
  -7 -13   0 0.63401 3.22330   1
   7 -13   0 8.30004 4.03357   1
   7  13   0 1.41130 3.36351   5
  -7  13   0 -2.6011  2.9354   1
   7  13   0 9.01394 4.40292   1
  -8 -13   0 42.4914  7.0497   1
   8 -13   0 36.9761  6.9265   1
  -8  13   0 48.4969  7.4399   1
   8  13   0 27.5780  6.1486   5
   8  13   0 48.0333  7.0410   3
   8  13   0 40.4462  7.3070   1
   9 -13   0 42.0960  7.8232   1
  -9 -13   0 28.5900  6.6094   1
   9  13   0 45.2970  8.1314   1
   9  13   0 44.2963  7.2719   3
  -9  13   0 24.4162  6.3182   1
   9  13   0 45.6953  7.9419   5
 -10 -13   0 54.3562  9.2969   1
  10 -13   0 53.8653  8.7889   1
  10  13   0 70.0513  8.7840   3
  10  13   0 61.6999  9.6204   1
 -10  13   0 58.6115  9.3424   1
 -11 -13   0 37.5170  8.2744   1
  11 -13   0 38.9581  8.4062   1
 -11  13   0 43.8501  9.0067   1
  11  13   0 41.8115  8.6699   1
 -12 -13   0 -1.1921  4.3555   1
  12 -13   0 7.69852 5.39164   1
  12  13   0 8.09451 5.87762   1
 -12  13   0 2.56770 5.24522   1
 -13 -13   0 7.09934 6.19967   1
 -13  13   0 11.3064  6.7111   1
   0 -14   0 1030.57   35.63   5
   0 -14   0 1005.15   35.33   1
   0  14   0 1011.58   35.68   5
   0  14   0 1046.47   35.78   1
   1 -14   0 159.114   8.277   5
  -1 -14   0 147.819   8.829   1
   1 -14   0 148.870   8.880   1
  -1 -14   0 156.674   8.521   5
   1  14   0 166.757   9.565   1
   1  14   0 166.640   8.845   5
  -1  14   0 152.597   9.248   1
  -2 -14   0 16.6167  3.6144   1
   2 -14   0 24.0375  4.0445   1
   2 -14   0 16.7603  3.0247   5
  -2 -14   0 16.0930  1.8074   4
  -2  14   0 14.6060  3.7179   1
   2  14   0 20.8845  3.8810   5
   2  14   0 13.2564  3.6562   1
   3 -14   0 12.0199  3.3647   1
  -3 -14   0 8.92517 3.26494   1
   3  14   0 4.11086 3.22874   1
  -3  14   0 9.54817 3.47017   1
   3  14   0 5.62271 2.72755   5
  -4 -14   0 9.83007 3.44570   1
   4 -14   0 4.67669 2.95619   1
  -4  14   0 7.72473 3.31622   1
   4  14   0 5.95932 2.96881   5
   4  14   0 6.58850 3.66641   1
   5 -14   0 1.12112 3.14238   1
  -5 -14   0 5.50655 3.40698   1
  -5 -14   0 -1.0952  2.7569   1
   5  14   0 0.87456 2.55687   5
  -5  14   0 1.07185 3.30330   1
   5  14   0 2.89519 3.29290   1
  -6 -14   0 150.362  10.887   1
   6 -14   0 175.133  11.082   1
  -6  14   0 144.213  10.828   1
   6  14   0 180.666  11.608   1
   6  14   0 147.033  10.965   5
  -7 -14   0 15.4698  4.6084   1
   7 -14   0 8.92489 4.53246   1
  -7  14   0 3.11433 3.52984   1
   7  14   0 16.6114  4.9001   5
   7  14   0 4.80384 4.25380   1
   8 -14   0 266.781  16.247   1
  -8 -14   0 276.531  16.492   1
   8  14   0 286.883  16.088   3
  -8  14   0 258.069  16.208   1
   8  14   0 311.870  17.858   5
   8  14   0 298.843  16.877   1
  -9 -14   0 32.9988  6.8514   1
   9 -14   0 64.4310  9.1468   1
   9  14   0 60.2943  9.0095   1
  -9  14   0 48.3867  8.7611   1
   9  14   0 58.8679  8.3517   3
   9  14   0 65.6740  9.6285   5
  10 -14   0 5.84621 4.94528   1
 -10 -14   0 13.8506  5.3450   1
  10  14   0 4.94042 4.85581   3
  10  14   0 6.08427 5.00488   1
 -10  14   0 5.27680 4.93706   1
  11 -14   0 142.613  14.449   1
 -11 -14   0 107.965  13.656   1
 -11  14   0 108.323  13.369   1
  11  14   0 137.436  14.522   1
 -12 -14   0 54.4225 10.7282   1
  12  14   0 46.9040  9.3503   1
 -12  14   0 65.9939 11.4371   1
 -13 -14   0 -4.8580  4.4866   1
 -13  14   0 4.26738 5.98439   1
   0 -15   0 1.59090 1.76110   5
   0 -15   0 -2.4385  1.9627   1
   0  15   0 0.35503 2.51081   1
   1 -15   0 153.640   9.045   1
  -1 -15   0 155.136   9.274   1
   1 -15   0 152.808   8.287   5
  -1 -15   0 142.136   8.375   5
   1  15   0 144.618   9.420   1
  -1  15   0 154.504   9.498   1
   1  15   0 159.594   8.937   5
   2 -15   0 652.896  24.550   5
   2 -15   0 662.124  25.015   1
  -2 -15   0 651.868  24.926   1
   2  15   0 643.773  25.368   5
   2  15   0 687.986  25.652   1
  -2  15   0 638.270  25.216   1
   3 -15   0 100.637   8.802   1
  -3 -15   0 95.8283  7.5553   1
  -3  15   0 100.784   8.117   1
   3  15   0 92.9642  7.5540   5
   3  15   0 112.731   8.477   1
   4 -15   0 42.8575  5.9403   1
  -4 -15   0 35.5852  5.4455   1
  -4  15   0 36.0922  5.9631   1
   4  15   0 30.0935  5.0564   5
   4  15   0 43.2677  6.2804   1
  -5 -15   0 359.688  17.040   1
   5 -15   0 356.540  17.180   1
  -5 -15   0 352.320  17.054   1
   5  15   0 335.640  17.447   5
  -5  15   0 323.903  16.905   1
   5  15   0 376.327  17.554   1
   6 -15   0 4.12270 3.67230   1
  -6 -15   0 9.89210 4.03195   1
   6  15   0 7.44291 3.68612   5
   6  15   0 12.5757  4.6645   1
  -6  15   0 7.71406 4.12949   1
  -7 -15   0 17.3438  4.9642   1
   7 -15   0 12.4322  4.8387   1
   7  15   0 16.2678  5.1117   1
  -7  15   0 16.0382  4.8286   1
   7  15   0 18.6201  5.0764   5
  -8 -15   0 5.37630 4.23748   1
   8 -15   0 12.0839  5.0981   1
   8  15   0 2.68483 4.00064   5
   8  15   0 1.43832 4.09827   3
   8  15   0 4.59574 4.04861   1
  -8  15   0 12.1738  4.8793   1
   9 -15   0 25.4964  6.6810   1
  -9 -15   0 27.0953  6.5032   1
  -9  15   0 24.7408  6.7880   1
   9  15   0 15.5225  5.5921   3
   9  15   0 17.2780  6.1531   5
   9  15   0 30.1897  6.8220   1
  10 -15   0 105.410  12.098   1
 -10 -15   0 114.790  13.191   1
  10  15   0 82.1284 11.1509   1
  10  15   0 129.466  12.332   3
 -10  15   0 105.838  12.758   1
 -11 -15   0 -2.0760  4.3852   1
  11 -15   0 -0.5992  4.7217   1
 -11  15   0 4.63288 4.97771   1
  11  15   0 1.77915 4.76007   1
 -12 -15   0 15.2297  7.3484   1
  12  15   0 19.8519  7.1104   1
 -12  15   0 31.2985  8.6913   1
 -13 -15   0 34.1977  9.0467   1
 -13  15   0 39.9665  9.4924   1
   0 -16   0 72.9613  5.5189   5
   0 -16   0 70.0954  7.0380   1
   0  16   0 68.0856  7.0953   1
   1 -16   0 40.7626  4.5955   5
  -1 -16   0 39.0875  4.7431   5
  -1 -16   0 42.2165  5.5529   1
   1 -16   0 41.8193  5.4126   1
   1  16   0 45.8461  5.2652   5
  -1  16   0 39.1065  3.1421   4
   1  16   0 45.7602  5.8859   1
  -1  16   0 38.8211  5.7154   1
   2 -16   0 89.9041  7.3733   1
   2 -16   0 83.8466  6.0199   5
  -2 -16   0 67.6243  7.1208   1
   2  16   0 83.4742  6.8131   5
  -2  16   0 81.7196  8.0368   1
   2  16   0 72.6753  7.5725   1
   3 -16   0 -1.6801  2.6690   1
  -3 -16   0 2.19524 1.71517   4
  -3 -16   0 -0.8718  2.6127   1
  -3  16   0 3.29046 3.22287   1
   3  16   0 -0.5973  2.9514   1
   3  16   0 0.20826 2.35717   5
  -4 -16   0 11.5765  3.9918   1
   4 -16   0 7.68613 3.60860   1
   4  16   0 5.78017 3.66266   1
   4  16   0 8.85872 3.44108   5
  -4  16   0 10.6510  4.2595   1
  -5 -16   0 50.3038  6.8253   1
   5 -16   0 51.6286  6.9099   1
  -5 -16   0 45.2535  6.6088   1
   5  16   0 60.2937  7.4816   5
   5  16   0 46.4953  6.7845   1
  -5  16   0 52.5607  7.2050   1
  -6 -16   0 109.229  10.612   1
   6 -16   0 134.505  10.347   1
   6  16   0 125.702  10.445   1
   6  16   0 112.673   9.892   5
  -6  16   0 106.167  10.636   1
   7 -16   0 50.7506  7.7194   1
  -7 -16   0 51.1695  7.6940   1
  -7  16   0 41.2880  7.4130   1
   7  16   0 41.1437  7.3757   1
   7  16   0 57.6612  8.2159   5
  -8 -16   0 13.1084  4.9165   1
   8 -16   0 24.0233  6.4175   1
   8  16   0 16.7667  5.8612   1
  -8  16   0 17.4520  5.3634   1
   8  16   0 29.5199  6.4913   5
   8  16   0 31.7623  6.6322   3
  -9 -16   0 103.872  11.998   1
   9 -16   0 114.499  12.150   1
  -9  16   0 82.4240 10.9083   1
   9  16   0 139.652  12.590   3
   9  16   0 86.4496 11.1468   1
  10 -16   0 8.69642 5.23909   1
 -10 -16   0 -1.3289  3.9986   1
 -10  16   0 7.85168 5.00470   1
  10  16   0 -2.7152  4.6469   3
  10  16   0 -0.1428  4.5370   1
 -11 -16   0 21.7256  6.8163   1
  11 -16   0 6.61646 5.78264   1
 -11  16   0 2.38032 4.56383   1
  11  16   0 6.18857 5.65866   1
 -12 -16   0 99.5402 14.0778   1
  12  16   0 95.0590 13.3600   1
 -12  16   0 87.4929 12.9721   1
   0 -17   0 1.51814 1.76632   5
   0 -17   0 -1.6487  2.3037   1
   0  17   0 6.21308 3.32444   1
   1 -17   0 63.7864  5.3332   5
   1 -17   0 66.8036  7.2593   1
  -1 -17   0 61.3723  6.7294   1
  -1 -17   0 48.0580  5.4515   5
   1  17   0 70.4722  6.7324   5
   1  17   0 88.9917  8.2259   1
  -1  17   0 49.5705  6.3193   1
  -1  17   0 61.1088  3.6530   4
   2 -17   0 1.78765 1.87452   5
   2 -17   0 2.16448 2.83624   1
  -2 -17   0 1.66273 2.75070   1
  -2  17   0 0.98009 2.96235   1
   2  17   0 0.52696 2.48639   5
   2  17   0 2.77228 3.15331   1
   3 -17   0 104.831   8.738   1
  -3 -17   0 110.703   8.614   1
   3 -17   0 114.919   7.645   5
  -3 -17   0 120.773   6.022   4
   3  17   0 117.672   8.802   5
   3  17   0 127.973   9.563   1
  -3  17   0 121.510   9.229   1
  -4 -17   0 37.1774  6.0830   1
   4 -17   0 53.6513  7.0557   1
   4  17   0 57.0540  6.9384   5
  -4  17   0 61.7352  7.5730   1
   4  17   0 45.6217  6.8555   1
  -5 -17   0 104.846  10.044   1
  -5 -17   0 99.1002  9.8604   1
   5 -17   0 113.238  10.518   1
   5  17   0 111.401   9.229   5
   5  17   0 104.295  10.368   1
  -5  17   0 88.4757  9.5410   1
  -6 -17   0 15.5360  5.0135   1
   6 -17   0 24.7527  5.4728   1
  -6 -17   0 18.3311  5.0918   1
  -6  17   0 17.8983  5.0388   1
   6  17   0 8.94699 4.14416   5
   6  17   0 7.76952 4.22107   1
  -7 -17   0 78.0297  9.6521   1
   7 -17   0 111.906  11.219   1
   7  17   0 115.105  11.893   5
   7  17   0 118.193  11.914   1
  -7  17   0 131.488  10.700   1
  -8 -17   0 -2.4342  3.5354   1
   8 -17   0 -1.4072  3.0697   1
   8  17   0 0.90895 3.58460   5
  -8  17   0 0.34702 4.05067   1
   8  17   0 1.99189 4.09002   1
   9 -17   0 -2.2209  3.8689   1
  -9 -17   0 3.58795 4.45076   1
   9  17   0 -3.6870  3.7673   1
   9  17   0 1.50164 4.93736   3
  -9  17   0 1.35385 4.58132   1
  10 -17   0 2.54433 4.67203   1
 -10 -17   0 1.70581 4.30890   1
  10  17   0 -0.6988  4.7957   1
 -10  17   0 0.55095 4.48569   1
  10  17   0 7.20605 5.66045   3
 -11 -17   0 6.78616 5.57151   1
  11 -17   0 8.15238 5.88973   1
  11  17   0 0.90819 5.16597   1
 -11  17   0 9.79165 6.05353   1
 -12 -17   0 4.05184 5.51361   1
 -12  17   0 1.27710 5.12427   1
   0 -18   0 425.741  17.726   5
   0 -18   0 395.867  18.005   1
   0  18   0 418.786  18.610   1
  -1 -18   0 15.1638  3.1274   5
   1 -18   0 6.85402 3.31864   1
   1 -18   0 10.3782  2.9705   5
  -1 -18   0 13.0073  3.8401   1
  -1  18   0 -0.4263  2.5210   1
   1  18   0 6.52665 3.53996   1
  -1  18   0 13.0933  1.6823   4
   1  18   0 6.22149 3.06794   5
   2 -18   0 22.8958  4.6808   1
  -2 -18   0 14.8626  4.2755   1
   2 -18   0 15.1565  3.3707   5
  -2  18   0 17.6661  4.5148   1
   2  18   0 19.0403  4.6139   1
   2  18   0 18.4549  4.1981   5
  -3 -18   0 590.390  20.165   4
   3 -18   0 600.446  23.388   5
  -3 -18   0 614.214  24.521   1
   3 -18   0 564.148  23.950   1
   3  18   0 596.078  24.690   1
  -3  18   0 552.105  24.116   1
   3  18   0 564.211  24.438   5
  -4 -18   0 0.52091 2.86585   1
   4 -18   0 2.17717 3.28765   1
   4  18   0 0.63579 3.07658   5
  -4  18   0 0.79686 3.31611   1
   4  18   0 -0.9674  3.3262   1
  -5 -18   0 203.083  12.660   1
  -5 -18   0 192.133  12.335   1
   5 -18   0 221.605  13.280   1
   5  18   0 181.623  12.856   1
  -5  18   0 194.911  12.763   1
   5  18   0 206.782  13.074   5
  -6 -18   0 4.52320 3.52828   1
  -6 -18   0 1.92997 3.09552   1
   6 -18   0 0.24139 3.47566   1
   6  18   0 3.25503 4.05453   1
   6  18   0 6.15469 3.88722   5
  -6  18   0 -2.0592  3.1196   1
   7 -18   0 77.7942  9.7699   1
  -7 -18   0 86.1672 10.0695   1
  -7  18   0 78.3894  9.9359   1
   7  18   0 91.9809 10.6286   5
   7  18   0 78.2740 10.0671   1
   8 -18   0 19.3234  5.6898   1
  -8 -18   0 7.14006 4.81228   1
  -8  18   0 11.9905  5.0941   1
   8  18   0 20.9891  6.2855   5
   8  18   0 21.9229  6.4195   1
  -9 -18   0 6.71675 5.02826   1
   9 -18   0 0.88436 3.86526   1
   9  18   0 4.40238 4.76351   1
   9  18   0 9.46541 5.53362   3
  -9  18   0 4.76994 4.66700   1
 -10 -18   0 72.0501 10.9070   1
  10 -18   0 61.6106 10.0684   1
  10  18   0 78.0885 11.2324   1
 -10  18   0 79.2822 11.8473   1
  10  18   0 76.8521 10.3999   3
  11 -18   0 27.3175  7.3700   1
 -11 -18   0 33.5931  8.7083   1
 -11  18   0 51.6727  9.8556   1
  11  18   0 27.9244  8.2844   1
 -12 -18   0 31.7626  8.7183   1
 -12  18   0 20.1071  7.8001   1
   0 -19   0 1.09885 1.94722   5
   0 -19   0 0.00759 2.75047   1
   0  19   0 0.29772 2.73264   1
  -1 -19   0 49.1471  5.7624   5
   1 -19   0 31.4149  5.6678   1
   1 -19   0 41.9164  5.1651   5
  -1 -19   0 40.0993  5.8722   1
   1  19   0 48.9831  5.7995   5
   1  19   0 35.8364  5.9647   1
  -1  19   0 40.4051  6.2613   1
   2 -19   0 7.10289 2.73075   5
  -2 -19   0 5.26724 3.21821   1
   2 -19   0 2.99703 3.17745   1
  -2  19   0 2.77472 3.49221   1
   2  19   0 11.1745  4.2509   1
   2  19   0 7.46131 3.24549   5
  -3 -19   0 8.66359 4.09583   1
   3 -19   0 16.8033  3.7326   5
   3 -19   0 19.1860  4.8006   1
   3  19   0 17.7538  4.3457   5
  -3  19   0 15.4163  4.9518   1
   3  19   0 7.69044 4.26549   1
   4 -19   0 -0.1123  3.5376   1
  -4 -19   0 -6.9777  2.1427   1
  -4  19   0 -1.3759  2.9720   1
   4  19   0 -1.7940  2.5530   5
   4  19   0 -4.6677  3.0634   1
   5 -19   0 34.4879  6.3212   1
  -5 -19   0 50.0305  7.3909   1
   5  19   0 43.0094  7.0941   1
  -5  19   0 51.7410  7.5129   1
   5  19   0 42.6983  6.8002   5
   6 -19   0 30.6493  6.6296   1
  -6 -19   0 23.1744  5.7379   1
  -6 -19   0 32.5236  6.4932   1
  -6  19   0 32.9706  6.6691   1
   6  19   0 26.7059  5.9089   5
   6  19   0 23.3445  5.9176   1
   7 -19   0 1.46289 3.67135   1
  -7 -19   0 5.29564 4.15909   1
  -7  19   0 -2.6387  3.5163   1
   7  19   0 9.40970 4.53135   1
   7  19   0 4.04165 3.84175   5
   8 -19   0 1.33447 4.00756   1
  -8 -19   0 10.1498  4.9181   1
   8  19   0 -1.2906  3.8018   5
  -8  19   0 11.6150  5.3212   1
   8  19   0 2.73758 4.42004   1
  -9 -19   0 3.51471 4.51439   1
   9 -19   0 2.43196 4.20617   1
  -9  19   0 3.41674 4.71344   1
   9  19   0 -4.0968  4.0222   1
   9  19   0 -6.5122  4.0003   3
 -10 -19   0 20.1877  6.3118   1
  10 -19   0 13.9853  6.2760   1
  10  19   0 39.2326  8.4892   3
  10  19   0 15.3372  6.5225   1
 -10  19   0 22.5088  7.3552   1
 -11 -19   0 21.2364  7.4054   1
  11 -19   0 22.2535  7.0409   1
  11  19   0 16.8733  7.0970   1
 -11  19   0 3.97060 5.65601   1
 -12 -19   0 12.5122  6.4621   1
 -12  19   0 2.08423 5.65079   1
   0 -20   0 15.3813  3.3797   5
   0 -20   0 11.4287  4.3359   1
   0  20   0 10.6236  4.4975   1
  -1 -20   0 2.04377 3.06413   1
  -1 -20   0 1.62778 2.20964   5
   1 -20   0 -0.5446  1.9310   5
   1 -20   0 1.91924 2.98160   1
   1  20   0 -3.9740  2.0105   5
  -1  20   0 1.12618 3.06620   1
   1  20   0 3.15346 3.88068   1
   2 -20   0 110.123   8.912   1
  -2 -20   0 119.318   9.421   1
   2 -20   0 107.971   7.728   5
  -2  20   0 119.203  10.843   1
   2  20   0 87.4148  9.3827   1
   2  20   0 108.426   8.456   5
   3 -20   0 7.07553 3.86713   1
  -3 -20   0 9.38351 4.14121   1
   3 -20   0 2.37397 2.36462   5
   3  20   0 -0.2116  2.8438   5
  -3  20   0 1.98138 3.78418   1
   3  20   0 5.89102 3.81399   1
   4 -20   0 71.5905  7.3545   5
   4 -20   0 83.6511  9.2038   1
  -4 -20   0 86.9333  9.5001   1
   4  20   0 80.2712  8.8475   5
  -4  20   0 66.7085  8.4546   1
   4  20   0 80.6741  9.1918   1
   5 -20   0 17.6011  5.0795   1
  -5 -20   0 25.7348  5.7248   1
  -5  20   0 10.0936  4.4818   1
   5  20   0 30.2481  6.5249   1
   5  20   0 24.1527  5.5547   5
  -6 -20   0 58.7850  8.4337   1
   6 -20   0 53.1058  8.0802   1
  -6 -20   0 53.8376  8.1939   1
   6  20   0 44.0969  7.3601   5
   6  20   0 50.5572  8.0173   1
  -6  20   0 45.9905  7.7889   1
  -7 -20   0 24.0521  6.2063   1
   7 -20   0 39.2880  7.0499   1
   7  20   0 31.3912  6.9501   1
  -7  20   0 30.0143  7.1465   1
   7  20   0 30.7182  6.8111   5
  -8 -20   0 0.62088 3.92356   1
   8 -20   0 -3.2657  3.8187   1
   8  20   0 -2.6905  4.1154   1
  -8  20   0 3.23450 4.50189   1
  -9 -20   0 -3.9400  3.4863   1
   9 -20   0 -1.1939  3.6970   1
   9  20   0 -7.9514  3.8413   1
   9  20   0 2.79401 5.22892   3
  -9  20   0 -2.9248  4.3902   1
 -10 -20   0 -2.1610  3.8606   1
  10 -20   0 0.50357 4.61961   1
  10  20   0 -1.0794  3.9434   1
  10  20   0 5.28773 6.49200   3
 -10  20   0 -1.0451  4.7584   1
 -11 -20   0 40.5941  9.1386   1
  11  20   0 26.4961  8.0584   1
 -11  20   0 29.5401  8.4934   1
 -12 -20   0 29.8835  8.8026   1
 -12  20   0 20.9300  8.0001   1
   0 -21   0 -0.8564  3.0160   1
   0 -21   0 0.35013 2.13894   5
   0  21   0 -1.2469  2.9960   1
   1 -21   0 36.4964  5.2031   5
  -1 -21   0 43.4625  5.5986   5
   1 -21   0 42.1058  6.4371   1
  -1 -21   0 24.6606  5.4690   1
   1  21   0 32.1975  5.1788   5
  -1  21   0 49.0777  7.2840   1
   1  21   0 36.8908  6.7126   1
  -2 -21   0 6.47370 4.02881   1
   2 -21   0 1.93165 3.28480   1
   2 -21   0 5.50745 2.63497   5
   2  21   0 5.37897 3.95556   1
  -2  21   0 9.32465 4.46641   1
  -2  21   0 6.74400 2.20354   4
   2  21   0 0.79882 2.95513   5
   3 -21   0 217.778  13.561   1
  -3 -21   0 241.840  14.288   1
   3 -21   0 223.006  12.308   5
   3  21   0 237.825  14.377   1
  -3  21   0 239.596  14.223   1
   3  21   0 232.404  13.670   5
   4 -21   0 14.2228  3.8121   5
   4 -21   0 17.7591  4.9120   1
  -4 -21   0 11.5329  4.4172   1
   4  21   0 11.9274  4.7356   1
   4  21   0 15.0304  4.5711   5
  -4  21   0 12.4923  4.4797   1
  -5 -21   0 67.2154  8.8629   1
   5 -21   0 89.7772 10.0040   1
   5  21   0 101.257  11.125   1
   5  21   0 85.9363  9.7602   5
  -5  21   0 90.9518 10.2230   1
   6 -21   0 90.0818 10.3746   1
  -6 -21   0 64.3705  8.7715   1
  -6 -21   0 80.8549  9.9164   1
   6  21   0 74.3386  9.7589   1
   6  21   0 63.8119  9.0467   5
  -6  21   0 66.2041  9.2006   1
  -7 -21   0 22.3430  6.0313   1
   7 -21   0 40.9005  7.5663   1
  -7  21   0 27.2956  6.8966   1
   7  21   0 43.2702  8.0252   1
   7  21   0 34.8877  7.3371   5
   8 -21   0 38.2382  7.9556   1
  -8 -21   0 49.7840  8.5524   1
  -8  21   0 38.2512  8.1107   1
   8  21   0 37.5678  8.1915   1
   9 -21   0 12.1974  5.5742   1
  -9 -21   0 20.8086  6.3901   1
   9  21   0 13.0846  6.3559   3
   9  21   0 16.5030  6.5842   1
  -9  21   0 12.5954  6.3589   1
  10 -21   0 40.7694  8.9892   1
 -10 -21   0 50.0448  9.5723   1
  10  21   0 69.4653 10.9109   3
 -10  21   0 49.2221  9.7502   1
  10  21   0 46.5950  9.6585   1
 -11 -21   0 1.23994 4.86327   1
  11  21   0 2.48991 5.49723   1
 -11  21   0 3.40364 5.74721   1
   0 -22   0 126.220   9.920   1
   0 -22   0 138.108   9.208   5
   0  22   0 130.924  10.360   1
   1 -22   0 9.52570 3.20503   5
  -1 -22   0 13.9214  4.5671   1
   1 -22   0 19.2683  5.2661   1
  -1 -22   0 18.4794  4.2922   5
   1  22   0 16.1666  5.0841   1
  -1  22   0 19.3039  5.2493   1
   1  22   0 23.1000  4.6317   5
  -2 -22   0 144.190  11.040   1
   2 -22   0 169.095  11.627   1
   2 -22   0 162.087   9.833   5
  -2  22   0 130.582  11.108   1
   2  22   0 116.679   9.613   5
  -2  22   0 162.943   7.424   4
   2  22   0 150.254  11.524   1
  -3 -22   0 3.70382 3.67793   1
   3 -22   0 4.82583 3.55073   1
   3 -22   0 2.46244 2.59690   5
   3  22   0 0.99927 3.07476   5
   3  22   0 -0.9128  3.7029   1
  -3  22   0 -2.3886  3.4291   1
  -4 -22   0 41.1538  6.9544   1
   4 -22   0 44.0744  7.3300   1
   4 -22   0 31.6118  5.2600   5
   4  22   0 29.7210  6.6818   1
  -4  22   0 55.4450  8.1187   1
   4  22   0 50.0513  7.1894   5
  -5 -22   0 42.4156  7.3200   1
   5 -22   0 41.7787  7.4473   1
   5 -22   0 44.8494  6.3208   5
   5  22   0 43.6487  7.3021   5
   5  22   0 41.2504  7.5704   1
  -5  22   0 35.7770  6.9144   1
   6 -22   0 22.6682  6.1174   1
  -6 -22   0 19.0747  5.5461   1
  -6 -22   0 18.5202  5.6888   1
  -6  22   0 7.37873 5.07433   1
   6  22   0 12.3828  5.1662   5
   6  22   0 13.8615  5.4973   1
  -7 -22   0 3.93257 4.10135   1
   7 -22   0 4.13093 4.30263   1
   7  22   0 -1.5290  3.8708   5
   7  22   0 -1.1590  4.2210   1
  -7  22   0 -2.0656  3.6409   1
  -8 -22   0 8.07655 4.74994   1
   8 -22   0 4.99264 4.81711   1
   8  22   0 8.05761 5.52299   1
  -8  22   0 7.02603 5.01622   1
  -9 -22   0 55.5723 10.1489   1
   9 -22   0 66.2375 10.4031   1
  -9  22   0 75.0825 11.3457   1
   9  22   0 71.1640 10.7814   1
   9  22   0 76.3304 11.2687   3
 -10 -22   0 6.52745 5.55243   1
  10 -22   0 -0.2763  4.8104   1
  10  22   0 -5.3422  4.8608   1
  10  22   0 2.78352 6.38969   3
 -10  22   0 3.39607 5.53129   1
 -11 -22   0 21.5196  8.0586   1
 -11  22   0 33.8476  9.3128   1
  11  22   0 22.5809  8.3231   1
   0 -23   0 -0.3938  2.3260   5
   0 -23   0 0.15894 3.15698   1
   0  23   0 -1.9200  3.5300   1
  -1 -23   0 52.8266  7.8529   1
  -1 -23   0 51.5791  6.5239   5
   1 -23   0 49.5908  6.2163   5
   1 -23   0 53.4080  7.6428   1
  -1  23   0 51.1753  7.7831   1
   1  23   0 49.7101  7.6696   1
   2 -23   0 4.96019 2.74223   5
  -2 -23   0 6.46548 3.67679   1
   2 -23   0 -0.4637  3.3039   1
  -2  23   0 -2.5380  2.9028   1
   2  23   0 3.44572 3.29163   5
   2  23   0 5.51011 4.06662   1
   3 -23   0 -0.4231  3.2002   1
   3 -23   0 0.13860 2.37642   5
  -3 -23   0 3.51248 3.31377   1
   3  23   0 3.61786 3.68961   5
   3  23   0 -2.1525  3.3459   1
  -3  23   0 0.88006 3.15521   1
  -4 -23   0 31.8218  6.7213   1
   4 -23   0 29.8170  6.4564   1
   4 -23   0 36.1379  5.5206   5
   4  23   0 41.6312  7.0617   5
  -4  23   0 37.0561  7.4045   1
   4  23   0 30.2132  6.5220   1
   5 -23   0 8.79604 4.32151   1
  -5 -23   0 21.5140  5.7061   1
   5  23   0 17.8341  6.0328   1
  -5  23   0 21.8428  6.0758   1
   5  23   0 15.8165  5.2922   5
  -6 -23   0 120.328  12.741   1
   6 -23   0 130.659  13.001   1
  -6 -23   0 133.133  13.224   1
   6  23   0 132.243  13.205   5
   6  23   0 132.069  13.038   1
  -6  23   0 107.751  12.232   1
   7 -23   0 76.3015 10.4594   1
  -7 -23   0 89.3202 11.1244   1
  -7  23   0 77.7323 10.6590   1
   7  23   0 97.4157 11.7138   5
   7  23   0 57.1621  9.4702   1
   8 -23   0 27.1019  6.9113   1
  -8 -23   0 29.4825  7.0329   1
  -8  23   0 23.3584  6.7742   1
   8  23   0 28.6540  7.5542   1
   9 -23   0 6.85170 5.47320   1
  -9 -23   0 13.0313  6.0509   1
   9  23   0 13.8336  6.3779   1
  -9  23   0 10.4097  6.2005   1
 -10 -23   0 17.0075  7.0197   1
  10 -23   0 19.1896  7.5652   1
  10  23   0 67.0598 10.8737   3
 -10  23   0 33.3064  8.7630   1
  10  23   0 58.7448 10.7072   1
 -11 -23   0 32.6884  8.6894   1
 -11  23   0 35.0488  9.4356   1
   0 -24   0 57.6451  7.9936   1
   0 -24   0 58.9377  6.9260   5
   0  24   0 65.2811  8.9516   1
   1 -24   0 16.6727  4.0715   5
   1 -24   0 19.9852  5.0791   1
  -1 -24   0 20.7634  5.6282   1
  -1  24   0 16.5116  5.4393   1
   1  24   0 13.2365  4.9882   1
  -2 -24   0 -4.2830  2.4128   1
   2 -24   0 -0.2851  3.1202   1
   2 -24   0 -0.1338  2.2864   5
  -2  24   0 -0.1946  3.2752   1
   2  24   0 -6.0437  3.1402   1
   2  24   0 2.93882 3.09724   5
   3 -24   0 23.0902  5.8158   1
   3 -24   0 22.6372  4.6386   5
  -3 -24   0 23.4216  5.9656   1
   3  24   0 19.1235  5.0792   5
   3  24   0 25.8121  6.1414   1
  -3  24   0 29.6108  6.3875   1
   4 -24   0 18.5988  5.4528   1
  -4 -24   0 11.9066  5.0658   1
   4  24   0 7.67644 4.68073   1
  -4  24   0 14.0276  5.0662   1
   4  24   0 6.87102 4.08305   5
  -5 -24   0 43.4556  7.7376   1
   5 -24   0 43.2511  7.8360   1
   5  24   0 59.5974  8.5883   5
   5  24   0 40.6143  7.8428   1
  -5  24   0 27.5650  6.9834   1
  -6 -24   0 17.1880  5.7349   1
   6 -24   0 21.8442  6.1973   1
  -6 -24   0 18.4127  5.7610   1
  -6  24   0 17.0280  5.7649   1
   6  24   0 6.07697 4.77557   5
   6  24   0 22.2691  6.3754   1
   7 -24   0 44.1780  8.4442   1
  -7 -24   0 52.4163  9.0503   1
  -7  24   0 45.6633  8.7280   1
   7  24   0 68.0314 10.0875   1
   8 -24   0 25.9861  7.5872   1
  -8 -24   0 20.9186  6.4037   1
   8  24   0 30.0816  7.9340   1
  -8  24   0 23.6666  6.8821   1
  -9 -24   0 29.2965  7.7748   1
   9 -24   0 23.0864  7.3331   1
   9  24   0 30.5877  8.1547   1
  -9  24   0 29.4618  8.1012   1
  10 -24   0 9.39301 5.93572   1
 -10 -24   0 12.5616  6.2289   1
  10  24   0 2.98578 6.97096   3
 -10  24   0 23.0298  7.9308   1
  10  24   0 2.27299 5.55828   1
   0 -25   0 1.24583 3.54645   1
   0  25   0 -4.9902  2.8018   1
   1 -25   0 13.7548  4.4382   1
  -1 -25   0 20.4115  5.2158   1
   1 -25   0 12.9683  3.6491   5
   1  25   0 7.16872 4.30497   1
  -1  25   0 5.25458 4.35156   1
   2 -25   0 9.20625 4.68622   1
   2 -25   0 8.24135 3.38398   5
  -2 -25   0 5.07826 3.79640   1
   2  25   0 1.96928 3.28801   5
  -2  25   0 1.95953 3.48853   1
   2  25   0 6.13564 4.45787   1
  -3 -25   0 34.9733  6.8227   1
   3 -25   0 48.8083  7.7445   1
   3  25   0 37.2433  7.4070   1
  -3  25   0 23.9034  6.2692   1
   3  25   0 31.7108  6.2320   5
   4 -25   0 34.2976  7.0839   1
  -4 -25   0 20.0975  6.1247   1
   4  25   0 44.8980  8.1927   1
   4  25   0 43.3097  7.3096   5
  -4  25   0 45.2060  8.1728   1
   5 -25   0 35.9489  7.2472   1
  -5 -25   0 35.5408  7.3309   1
   5  25   0 21.7537  6.2528   5
   5  25   0 23.6482  6.7640   1
  -5  25   0 36.0043  7.5056   1
  -6 -25   0 -2.1296  3.9585   1
  -6 -25   0 0.26306 4.02013   1
   6 -25   0 -2.3004  3.2708   1
   6  25   0 2.11632 4.32089   1
   6  25   0 -0.8502  3.9094   5
  -6  25   0 -1.6486  3.7747   1
  -7 -25   0 62.8049  9.5547   1
   7 -25   0 49.9725  8.8863   1
   7  25   0 35.3134  8.2712   1
  -7  25   0 43.6675  9.0773   1
   8 -25   0 6.21474 5.08143   1
  -8 -25   0 5.87757 5.30932   1
  -8  25   0 -3.2113  4.1314   1
   8  25   0 6.63361 5.48022   1
  -9 -25   0 65.8833 10.9125   1
   9 -25   0 56.1900 10.2193   1
  -9  25   0 29.7471  8.2062   1
   9  25   0 56.7044 10.4701   1
 -10 -25   0 12.3673  6.5737   1
 -10  25   0 22.1758  7.6002   1
  10  25   0 21.4805  8.3427   1
  10  25   0 29.2720  8.8040   3
   0 -26   0 223.386  14.464   1
   0  26   0 239.971  15.354   1
  -1 -26   0 30.6283  6.6005   1
   1 -26   0 29.0605  6.4924   1
  -1  26   0 47.4791  7.9999   1
   1  26   0 32.2431  7.2372   1
  -2 -26   0 7.69375 4.19588   1
   2 -26   0 13.3915  5.3338   1
  -2  26   0 10.6781  5.0563   1
   2  26   0 0.87948 3.64937   1
   2  26   0 8.44957 4.22531   5
   3 -26   0 -1.5488  3.2060   1
  -3 -26   0 -5.0215  2.9801   1
  -3  26   0 -1.0364  3.4261   1
   3  26   0 -2.3583  3.3487   1
   3  26   0 1.20821 3.62807   5
   4 -26   0 2.93393 4.11916   1
  -4 -26   0 -2.6731  3.0810   1
   4  26   0 -0.9719  3.9240   1
   4  26   0 -0.9160  3.3785   5
  -4  26   0 -5.0105  3.3897   1
   5 -26   0 26.9510  6.8440   1
  -5 -26   0 33.5734  7.4216   1
  -5  26   0 43.5623  8.1469   1
   5  26   0 43.0418  7.8241   5
   5  26   0 33.1672  7.3254   1
   6 -26   0 15.7870  6.0171   1
  -6 -26   0 13.6663  5.6287   1
  -6 -26   0 8.22496 5.32415   1
  -6  26   0 14.7938  6.4367   1
   6  26   0 10.0448  5.2980   1
  -7 -26   0 62.1205  9.7075   1
   7 -26   0 74.2226 10.6515   1
   7  26   0 93.6719 12.5249   1
  -7  26   0 74.9301 11.0807   1
  -8 -26   0 61.5643 10.5089   1
   8 -26   0 54.4268  9.8004   1
  -8  26   0 67.5438 11.2475   1
   8  26   0 75.4930 11.6904   1
   9 -26   0 3.27919 5.25186   1
  -9 -26   0 -0.7134  4.2825   1
   9  26   0 4.96001 5.96287   1
  -9  26   0 -2.1565  4.6140   1
 -10 -26   0 2.23275 5.70812   1
  10  26   0 5.68268 6.94632   3
 -10  26   0 0.56491 6.08628   1
  10  26   0 3.22497 5.87778   1
   0 -27   0 -0.6740  3.3450   1
   0  27   0 6.09919 4.51213   1
  -1 -27   0 20.2590  5.8157   1
   1 -27   0 5.94123 4.56916   1
  -1  27   0 8.33662 4.78495   1
   1  27   0 4.62351 4.28200   1
  -2 -27   0 13.8606  5.0081   1
   2 -27   0 7.14927 4.68283   1
   2  27   0 0.86497 3.66686   1
   2  27   0 16.2573  4.9951   5
  -2  27   0 1.18275 3.85701   1
  -3 -27   0 21.3707  5.7634   1
   3 -27   0 21.1795  5.9235   1
   3  27   0 18.9620  6.3409   1
   3  27   0 22.2899  5.9037   5
  -3  27   0 14.3717  5.4206   1
  -4 -27   0 -1.3073  3.6117   1
   4 -27   0 -1.4265  3.3292   1
  -4  27   0 1.10897 4.52323   1
   4  27   0 0.59457 3.87344   5
   4  27   0 -2.2888  4.1958   1
  -5 -27   0 -0.6780  3.6600   1
   5 -27   0 6.24778 4.61396   1
   5  27   0 -0.1841  3.8453   5
  -5  27   0 8.27149 4.90676   1
   5  27   0 0.12580 4.35829   1
  -6 -27   0 29.6642  7.4628   1
  -6 -27   0 24.1207  6.6161   1
   6 -27   0 31.3399  7.3897   1
  -6  27   0 26.7535  7.3420   1
   6  27   0 30.0306  7.9363   1
  -7 -27   0 4.18767 3.59332   1
   7 -27   0 26.0783  7.3918   1
  -7  27   0 15.0344  6.2225   1
   7  27   0 12.2299  6.2642   1
   8 -27   0 19.1767  6.9922   1
  -8 -27   0 14.5574  6.6400   1
   8  27   0 41.6549  9.6767   1
  -8  27   0 18.0655  6.9418   1
   9 -27   0 2.31533 5.18969   1
  -9 -27   0 11.2536  6.1486   1
   9  27   0 5.17525 5.87707   1
  -9  27   0 1.79306 5.43400   1
   0 -28   0 50.7398  8.3816   1
   0  28   0 46.4053  8.5960   1
  -1 -28   0 21.5823  5.9537   1
   1 -28   0 26.5079  6.6865   1
  -1  28   0 20.7270  6.4204   1
   1  28   0 6.24686 4.65595   1
  -2 -28   0 2.24992 3.91102   1
   2 -28   0 -3.8567  3.2285   1
  -2  28   0 4.64044 4.93185   1
   2  28   0 3.55023 4.09874   1
   3 -28   0 1.12776 3.83018   1
  -3 -28   0 5.57914 4.51807   1
   3  28   0 2.58612 3.70761   5
   3  28   0 3.29379 4.37186   1
  -3  28   0 3.60642 4.59809   1
   4 -28   0 10.7483  5.1662   1
  -4 -28   0 11.2358  5.1026   1
  -4  28   0 0.46509 4.36440   1
   4  28   0 4.07178 4.44398   1
   4  28   0 6.06252 4.63319   5
  -5 -28   0 1.73221 4.49453   1
   5 -28   0 -3.8135  3.8303   1
   5  28   0 0.34813 4.35272   5
   5  28   0 -5.4715  3.9169   1
  -5  28   0 -1.1083  4.0410   1
  -6 -28   0 8.56731 5.41970   1
   6 -28   0 11.5483  5.7938   1
  -6 -28   0 13.8886  6.1450   1
  -6  28   0 10.7515  5.7251   1
   6  28   0 4.81684 5.39988   1
   7 -28   0 6.20301 5.47214   1
  -7 -28   0 13.4515  4.6365   1
   7  28   0 13.2836  6.3724   1
  -7  28   0 16.4046  7.0002   1
  -8 -28   0 45.6971  9.4371   1
   8 -28   0 53.1999 10.0575   1
  -8  28   0 62.7932 11.0784   1
   8  28   0 33.5089  9.0198   1
  -9 -28   0 12.4562  6.4450   1
  -9  28   0 8.63896 6.26404   1
   9  28   0 12.3450  7.0833   1
   0 -29   0 4.67570 4.30525   1
   0  29   0 -0.0943  4.1394   1
   1 -29   0 109.963  12.294   1
  -1 -29   0 155.813  14.344   1
  -1  29   0 130.934  13.892   1
   1  29   0 89.3492 12.0698   1
  -2 -29   0 87.8961 11.1305   1
   2 -29   0 114.337  12.531   1
   2  29   0 109.824  12.699   1
  -2  29   0 89.5070 11.4873   1
   3 -29   0 80.0296 10.8865   1
  -3 -29   0 83.4172 11.0723   1
   3  29   0 90.8322 11.8576   1
   3  29   0 98.4340 11.3008   5
  -3  29   0 91.2710 11.8276   1
   4 -29   0 -0.4370  3.9444   1
  -4 -29   0 5.54673 4.94725   1
   4  29   0 0.79584 4.62853   1
  -4  29   0 0.72168 4.76489   1
   4  29   0 4.15038 4.79320   5
  -5 -29   0 24.4928  7.2004   1
   5 -29   0 21.3686  6.7639   1
  -5  29   0 21.0523  6.7979   1
   5  29   0 27.9226  7.6835   1
   6 -29   0 2.69402 5.14941   1
  -6 -29   0 3.03197 4.83040   1
  -6 -29   0 1.06625 4.63023   1
  -6  29   0 5.75991 5.21500   1
   6  29   0 5.33089 4.93693   1
   7 -29   0 9.54237 6.27005   1
  -7 -29   0 7.97460 4.05867   1
  -7  29   0 13.8290  6.3166   1
   7  29   0 15.5665  6.8362   1
  -8 -29   0 9.55217 6.20232   1
   8 -29   0 4.97628 6.13818   1
   8  29   0 10.2244  6.9276   1
  -8  29   0 9.83534 6.91045   1
  -9 -29   0 -0.1047  4.6209   1
   0 -30   0 2.29502 4.74241   1
   0  30   0 19.4077  6.3699   1
   1 -30   0 32.1830  7.4790   1
  -1 -30   0 36.3448  7.5726   1
   1  30   0 44.2846  8.5274   1
  -1  30   0 26.5817  7.5059   1
  -2 -30   0 7.55796 5.13241   1
   2 -30   0 15.8895  5.5430   1
  -2  30   0 18.7929  6.5771   1
   2  30   0 0.54547 4.24073   1
   3 -30   0 32.6321  7.5218   1
  -3 -30   0 23.2792  6.8767   1
   3  30   0 35.0005  8.3211   1
   3  30   0 24.3689  6.2055   5
  -3  30   0 25.4571  7.3714   1
  -4 -30   0 5.55155 4.72996   1
   4 -30   0 6.84450 5.16885   1
  -4  30   0 5.59305 4.70532   1
   4  30   0 8.81695 5.75112   1
   4  30   0 3.72501 4.65423   5
   5 -30   0 -1.4888  4.2406   1
  -5 -30   0 3.29912 4.88981   1
  -5  30   0 7.52775 5.95336   1
   5  30   0 3.39360 5.47493   1
   6 -30   0 -0.5757  4.6483   1
  -6 -30   0 -0.3151  4.9159   1
  -6 -30   0 1.96627 4.83144   1
   6  30   0 5.32166 5.30520   1
  -6  30   0 9.02934 6.17068   1
   7 -30   0 11.3404  6.2602   1
  -7 -30   0 13.4316  4.4212   1
  -7  30   0 19.3356  7.2274   1
   7  30   0 14.3757  7.0616   1
   8 -30   0 2.46309 5.83459   1
  -8 -30   0 10.6119  6.3766   1
   8  30   0 4.17074 5.99693   1
  -8  30   0 13.7546  7.3912   1
   0 -31   0 0.37239 3.95213   1
   0  31   0 2.79675 4.88544   1
  -1 -31   0 35.1467  7.9545   1
   1 -31   0 25.6746  6.4800   1
  -1  31   0 34.7196  8.1895   1
   1  31   0 13.6321  6.6694   1
   2 -31   0 -1.5768  4.0066   1
  -2 -31   0 2.05693 4.36686   1
  -2  31   0 4.40413 4.94383   1
   2  31   0 -0.0697  4.7634   1
   3 -31   0 -3.7219  3.9744   1
  -3 -31   0 1.25652 4.71738   1
   3  31   0 5.73954 5.06289   1
  -3  31   0 5.77409 5.07981   1
  -4 -31   0 -0.3861  4.4282   1
   4 -31   0 -1.1722  4.4903   1
   4  31   0 5.44220 4.96144   1
  -4  31   0 -2.6471  3.6310   1
   5 -31   0 9.54428 5.81925   1
  -5 -31   0 -1.3220  4.5310   1
  -5  31   0 0.17228 5.08230   1
   5  31   0 7.14407 5.65912   1
  -6 -31   0 16.3938  6.7736   1
  -6 -31   0 11.3330  5.8290   1
   6 -31   0 22.3188  7.3771   1
   6  31   0 1.15251 5.05244   1
  -6  31   0 18.1258  7.0659   1
   7 -31   0 5.35155 6.05103   1
  -7 -31   0 13.9636  4.4282   1
   7  31   0 9.10132 6.33881   1
  -7  31   0 -1.3047  4.5658   1
  -8 -31   0 -2.0102  5.1821   1
   0 -32   0 70.1183 10.3546   1
   0  32   0 44.2092  9.4624   1
   1 -32   0 -2.6919  3.4294   1
  -1 -32   0 -0.9838  4.3599   1
   1  32   0 9.01955 5.77138   1
  -1  32   0 2.09366 4.79150   1
   2 -32   0 7.32917 4.97201   1
  -2 -32   0 10.3567  5.6200   1
  -2  32   0 6.36302 5.83024   1
   2  32   0 13.0848  6.5493   1
  -3 -32   0 12.5786  6.3928   1
   3 -32   0 21.3405  6.5333   1
   3  32   0 2.10102 4.78630   1
  -3  32   0 17.8715  6.7453   1
   4 -32   0 -4.8720  4.1840   1
  -4 -32   0 -2.2355  4.2732   1
   4  32   0 3.83857 5.19198   1
  -4  32   0 0.12683 4.11105   1
  -5 -32   0 5.86622 5.37764   1
   5 -32   0 -4.5558  4.6532   1
  -5  32   0 7.12042 5.01329   1
   5  32   0 4.41306 6.09342   1
   6 -32   0 19.4489  7.3212   1
  -6 -32   0 26.8448  7.4954   1
  -6 -32   0 13.6146  6.7829   1
  -6  32   0 25.8568  8.3786   1
   6  32   0 20.7823  7.7062   1
   7 -32   0 15.1584  6.8178   1
  -7 -32   0 11.7349  4.5691   1
  -7  32   0 -4.2395  5.1189   1
   7  32   0 3.16686 5.92355   1
   0 -33   0 6.71696 5.28528   1
   0  33   0 -0.9077  4.7015   1
   1 -33   0 31.9707  8.0829   1
  -1 -33   0 38.2074  8.4735   1
  -1  33   0 23.1788  7.5050   1
   1  33   0 29.5801  8.3394   1
   2 -33   0 34.7782  7.9500   1
  -2 -33   0 17.1817  6.3336   1
  -2  33   0 33.4581  8.3379   1
   2  33   0 32.7167  8.5839   1
  -3 -33   0 6.16136 5.51624   1
   3 -33   0 22.8209  7.2666   1
   3  33   0 15.0069  6.2122   1
  -3  33   0 11.6364  6.6408   1
   4 -33   0 31.1744  7.9761   1
  -4 -33   0 23.5603  7.6486   1
  -4  33   0 31.5396  8.6706   1
   4  33   0 17.3547  7.2132   1
   5 -33   0 41.1497  9.1511   1
  -5 -33   0 29.8026  8.1679   1
   5  33   0 51.5924 10.4394   1
  -5  33   0 39.7619  9.3578   1
   6 -33   0 10.4082  6.2632   1
  -6 -33   0 16.3647  6.8099   1
  -6 -33   0 15.2681  6.7513   1
   6  33   0 16.5938  7.3203   1
  -6  33   0 10.2057  7.1339   1
   0 -34   0 18.1193  6.8083   1
   0  34   0 15.6122  6.6127   1
  -1 -34   0 10.4449  5.7366   1
   1 -34   0 8.92329 5.86563   1
  -1  34   0 10.1372  5.9635   1
   1  34   0 5.72694 6.36214   1
   2 -34   0 12.2246  6.0950   1
  -2 -34   0 8.37491 5.40191   1
   2  34   0 13.8706  6.9534   1
  -2  34   0 5.98294 6.29192   1
  -3 -34   0 1.74919 5.69159   1
   3 -34   0 9.68552 6.38767   1
  -3  34   0 -1.0573  4.7817   1
   3  34   0 5.65460 5.50494   1
   4 -34   0 93.0722 12.7288   1
  -4 -34   0 75.6417 11.7258   1
   4  34   0 86.2750 12.6479   1
  -4  34   0 64.2141 12.0051   1
   5 -34   0 10.7111  5.8886   1
  -5 -34   0 -0.5666  5.2027   1
  -5  34   0 3.79045 6.19150   1
   5  34   0 0.89988 5.92068   1
   0 -35   0 2.31874 4.96600   1
   0  35   0 -3.6368  5.0687   1
  -1 -35   0 -4.8405  4.3664   1
   1 -35   0 -5.4455  4.6222   1
   1  35   0 -1.1113  5.4009   1
  -1  35   0 6.06935 5.79070   1
  -2 -35   0 27.8505  7.8073   1
   2 -35   0 27.9108  8.3594   1
   2  35   0 47.3998  9.8260   1
  -2  35   0 27.9423  8.8574   1
  -3 -35   0 6.41272 5.17183   1
   3 -35   0 -2.1337  5.1693   1
  -3  35   0 2.48809 5.55144   1
   3  35   0 6.81598 6.02730   1
   4 -35   0 11.9472  6.3276   1
  -4 -35   0 13.0395  6.7768   1
  -4  35   0 4.81050 6.36887   1
   4  35   0 21.6862  7.8160   1
  -5 -35   0 6.36249 6.02392   1
  -5  35   0 4.28584 6.43958   1
   0 -36   0 14.0387  6.6312   1
   0  36   0 6.66182 5.76444   1
  -1 -36   0 20.0554  7.2824   1
   1 -36   0 21.7363  7.4471   1
  -1  36   0 22.3242  7.9773   1
   1  36   0 13.5474  7.0921   1
   2 -36   0 4.18535 5.60111   1
  -2 -36   0 5.10517 5.73816   1
   2  36   0 0.99830 5.60971   1
  -2  36   0 4.56566 5.69983   1
  -3 -36   0 -2.4399  4.9765   1
   3 -36   0 11.5102  6.3354   1
   3  36   0 -3.5686  5.4658   1
  -3  36   0 8.94641 6.63300   1
   0 -37   0 -0.0619  5.4477   1
   0  37   0 0.07014 5.39931   1
   1 -37   0 10.2469  6.7664   1
  -1 -37   0 14.8282  7.0523   1
   1  37   0 5.32281 6.54630   1
  -1  37   0 9.40048 6.96011   1
 -14   0   1 -7.0137  4.6055   1
 -13   0   1 -4.9116  4.4801   1
  12   0  -1 0.21488 4.84753   1
 -12   0   1 -1.2256  4.1352   1
 -11   0   1 -0.0150  3.8446   1
  11   0  -1 2.61699 4.30113   1
  10   0  -1 -5.9324  3.0111   1
  10   0  -1 -0.1694  3.2585   3
 -10   0   1 -3.6937  3.2148   1
   9   0  -1 5.80851 3.82766   1
   9   0  -1 -1.1963  3.0342   3
  -9   0   1 4.82694 3.86499   1
  -8   0   1 -3.8370  2.8391   1
   8   0  -1 -1.7138  2.7751   3
   8   0  -1 -0.1090  3.1670   1
   7   0  -1 2.94438 3.14503   1
   7   0  -1 -1.4189  2.4918   3
  -7   0   1 4.98091 3.25479   1
   6   0  -1 0.66650 2.66452   1
   6   0  -1 -0.1332  2.1695   3
  -6   0   1 1.27322 2.41526   1
  -5   0   1 2.18676 2.29320   1
   5   0  -1 -1.7448  2.0524   1
   5   0  -1 -1.3034  1.8935   3
   4   0  -1 -1.4404  1.7983   3
   4   0  -1 -3.5607  1.9628   1
  -4   0   1 -2.8802  1.6182   1
  -3   0   1 1.07287 1.73351   1
   3   0  -1 -0.8583  1.7964   1
   3   0  -1 -2.8568  1.5307   3
  -2   0   1 1.33894 1.19761   1
   2   0  -1 1.00532 1.32910   1
   2   0  -1 -0.8141  1.3094   3
   1   0  -1 -1.8776  0.5411   3
   1   0  -1 -2.4054  0.2685   1
   1   0  -1 -2.0826  0.5609   2
  -1   0   1 -2.3845  0.3440   1
  -1   0   1 -2.1173  0.3452   1
   0   0  -1 0.03345 0.16611   4
   0   0  -1 -0.1512  0.2378   2
   0   0  -1 0.12948 0.23057   3
   0   0   1 -0.0481  0.2159   4
   1   0   1 -0.7588  0.5569   1
  -1   0  -1 -0.4792  0.5782   1
   2   0   1 -5.7801  0.7774   3
  -2   0  -1 -5.1296  1.5983   1
   2   0   1 -7.4171  1.5811   1
   3   0   1 -1.7868  1.0248   3
  -3   0  -1 1.49959 2.06533   1
   3   0   1 -1.5680  1.8901   1
   4   0   1 1.60959 1.42205   3
  -4   0  -1 0.66357 1.80508   1
   4   0   1 0.29696 2.14408   1
   5   0   1 0.70925 2.59171   1
  -5   0  -1 1.47162 2.19766   1
   5   0   1 -0.5129  1.5107   3
   6   0   1 -3.4873  2.3687   1
  -6   0  -1 -1.0875  2.3716   1
   6   0   1 0.36280 1.76612   3
   7   0   1 -1.7967  3.2690   1
   7   0   1 0.20431 1.98127   3
  -7   0  -1 -5.7857  2.0366   1
   8   0   1 -1.3592  3.7873   1
   8   0   1 -1.9096  2.2440   3
  -8   0  -1 -4.1797  2.5939   1
   9   0   1 2.64829 3.80689   1
  -9   0  -1 -6.8726  1.9813   1
  10   0   1 4.66349 4.04717   1
 -10   0  -1 -1.4119  2.9979   1
 -11   0  -1 -0.6779  4.1623   1
  11   0   1 2.98789 4.79695   1
 -12   0  -1 1.78376 4.34969   1
  12   0   1 -1.7651  4.8367   1
 -13   0  -1 -0.1245  5.1441   1
  13   0   1 0.60380 5.42558   1
 -14   0  -1 -0.2169  5.9387   1
 -14  -1   1 -2.2135  4.9096   1
 -14   1   1 -3.5443  4.5615   1
 -13  -1   1 5.87843 5.64776   1
 -13   1   1 7.98692 5.72237   1
 -12  -1   1 4.48688 4.85787   1
  12  -1  -1 2.24612 4.70990   1
  12   1  -1 9.51975 5.69061   1
 -12   1   1 8.95963 5.21288   1
 -11  -1   1 95.0952 11.6663   1
  11  -1  -1 100.779  11.203   1
  11   1  -1 86.6894 10.7171   1
 -11   1   1 83.3105 10.8759   1
 -10  -1   1 1.44850 3.37694   1
  10  -1  -1 0.69067 3.29943   3
  10  -1  -1 1.68568 3.87759   1
 -10   1   1 -3.0066  3.2189   1
  10   1  -1 0.08278 3.29179   3
  10   1  -1 5.84114 4.20991   1
   9  -1  -1 180.984  12.198   1
  -9  -1   1 176.765  12.243   1
   9  -1  -1 169.018  10.105   3
   9   1  -1 169.612  10.191   3
  -9   1   1 195.075  12.728   1
   9   1  -1 172.501  12.007   1
   8  -1  -1 71.5805  6.6987   3
   8  -1  -1 72.6773  8.0628   1
  -8  -1   1 59.4690  7.4915   1
  -8   1   1 64.7095  8.0780   1
   8   1  -1 55.4688  6.1058   3
   8   1  -1 82.0367  8.5237   1
  -7  -1   1 -0.6828  2.5347   1
   7  -1  -1 2.01365 2.70812   3
   7  -1  -1 -4.9949  2.4512   1
   7   1  -1 -0.5241  2.8293   1
  -7   1   1 1.20677 2.99950   1
   7   1  -1 1.58634 2.67110   3
   6  -1  -1 0.69604 2.27260   3
   6  -1  -1 -4.3070  2.3763   1
  -6  -1   1 1.51644 2.64797   1
   6   1  -1 0.86755 2.34628   3
   6   1  -1 2.06019 2.91145   1
  -6   1   1 2.19788 2.47003   1
  -5  -1   1 278.603  12.523   1
   5  -1  -1 275.995  12.502   1
   5  -1  -1 285.433  11.871   3
  -5   1   1 284.048  12.498   1
   5   1  -1 285.495  12.642   1
   5   1  -1 286.184  12.131   3
  -4  -1   1 198.179   9.134   1
   4  -1  -1 184.034   9.026   1
   4  -1  -1 185.234   8.703   3
   4   1  -1 200.536   9.012   3
   4   1  -1 203.725   9.283   1
  -4   1   1 199.428   9.145   1
  -3  -1   1 87.2086  5.1264   1
   3  -1  -1 87.7391  5.0669   3
   3  -1  -1 96.2395  5.4029   1
  -3   1   1 91.6525  5.0160   1
   3   1  -1 87.9291  5.1902   3
   3   1  -1 86.6160  5.2848   1
   2  -1  -1 92.8823  3.9101   2
   2  -1  -1 89.0709  4.4581   1
   2  -1  -1 83.6245  4.4414   3
  -2  -1   1 78.2644  4.1025   1
   2   1  -1 88.8230  4.5372   1
   2   1  -1 85.1137  4.6217   3
  -2   1   1 91.0667  4.3166   1
   1  -1  -1 -0.3820  0.3932   1
   1  -1  -1 -1.1679  0.5177   3
  -1  -1   1 -0.6788  0.4601   5
   1  -1  -1 -1.7443  0.5065   2
  -1  -1   1 -1.5826  0.2920   1
   1   1  -1 -1.0459  0.5765   3
   1   1  -1 -1.3577  0.4235   5
  -1   1   1 -1.2398  0.3375   1
  -1   1   1 -1.2999  0.3546   1
   1   1  -1 -0.6627  0.4351   1
   0  -1  -1 0.06773 0.08587   1
   0  -1   1 0.05435 0.17205   1
   0  -1  -1 -0.4820  0.2860   3
   0  -1  -1 0.01783 0.19219   4
   0  -1  -1 0.40066 0.37387   2
   0  -1   1 0.07647 0.28065   4
   0  -1   1 -0.1878  0.1305   1
   0   1   1 0.62072 0.34875   4
   0   1  -1 0.14905 0.28207   4
   0   1  -1 -0.0738  0.1023   1
   0   1   1 0.01163 0.13786   1
   0   1  -1 0.28822 0.32400   3
   0   1  -1 -0.1828  0.2559   2
   0   1   1 0.03307 0.16237   1
   1  -1   1 0.74092 0.68542   1
  -1  -1  -1 2.28271 0.79859   1
   1   1   1 0.26545 0.67370   1
  -1   1  -1 -0.6292  0.3943   2
  -1   1  -1 2.05212 0.75894   1
  -2  -1  -1 920.181  30.050   1
   2  -1   1 968.703  30.336   1
  -2   1  -1 951.983  30.177   1
   2   1   1 938.408  30.315   1
  -3  -1  -1 35.3383  3.7167   1
   3  -1   1 38.2358  3.9938   1
   3  -1   1 43.3296  2.5633   3
   3   1   1 34.8093  3.9822   1
  -3   1  -1 35.5837  3.7715   1
   3   1   1 39.5184  2.8626   3
  -4  -1  -1 6.51543 2.42987   1
   4  -1   1 5.74187 1.55049   3
   4  -1   1 6.32220 2.63930   1
   4   1   1 -1.5793  2.0497   1
   4   1   1 3.32260 1.57582   3
  -4   1  -1 6.91492 2.54839   1
   5  -1   1 40.1113  3.3585   3
  -5  -1  -1 43.5328  5.1829   1
   5  -1   1 36.0816  4.9348   1
   5   1   1 43.6833  5.2968   1
   5   1   1 39.0049  3.5921   3
  -5   1  -1 43.4723  5.2509   1
   6  -1   1 102.151   8.174   1
  -6  -1  -1 97.7213  7.4553   1
   6  -1   1 98.2691  5.5144   3
   6   1   1 98.1929  5.7467   3
   6   1   1 96.9442  8.0753   1
  -6   1  -1 98.5743  7.8714   1
   7  -1   1 43.4367  4.1491   3
  -7  -1  -1 38.8696  5.9157   1
   7  -1   1 33.7066  6.1057   1
  -7   1  -1 41.5422  6.1294   1
   7   1   1 44.0818  4.2866   3
   7   1   1 44.0310  6.4331   1
   8  -1   1 -1.2161  2.3047   3
  -8  -1  -1 0.29708 3.42665   1
   8  -1   1 -2.1480  3.2568   1
   8   1   1 0.11458 3.49462   1
   8   1   1 -1.9971  2.3117   3
  -8   1  -1 -1.5022  3.3316   1
  -9  -1  -1 14.0883  4.7453   1
   9  -1   1 11.4757  4.9429   1
   9   1   1 12.8702  4.9995   1
   9   1   1 14.4087  3.4053   3
  -9   1  -1 5.22431 3.87255   1
  10  -1   1 13.8021  5.2358   1
 -10  -1  -1 1.93203 3.85518   1
  10   1   1 5.26304 4.47410   1
 -10   1  -1 3.19365 4.29574   1
 -11  -1  -1 56.9777  9.4884   1
  11  -1   1 37.3174  8.1174   1
  11   1   1 45.9336  8.3004   1
 -11   1  -1 38.7727  8.3027   1
 -12  -1  -1 13.4950  6.4278   1
  12  -1   1 17.3891  6.8442   1
 -12   1  -1 17.6123  6.5739   1
  12   1   1 22.9931  7.1695   1
  13  -1   1 -5.7990  4.8762   1
 -13  -1  -1 0.79481 5.41161   1
 -13   1  -1 3.80691 5.28811   1
  13   1   1 5.33006 5.89228   1
 -14  -1  -1 6.11960 6.68306   1
 -14   1  -1 -4.4619  5.3695   1
 -14  -2   1 27.1891  8.3150   1
 -14   2   1 0.90088 5.61871   1
 -13  -2   1 10.4924  6.5872   1
 -13   2   1 15.2793  6.8822   1
 -12  -2   1 35.7574  7.8029   1
  12  -2  -1 14.3382  5.8768   1
 -12   2   1 11.3833  5.5433   1
  12   2  -1 18.2129  6.5637   1
  11  -2  -1 -0.5523  3.9881   1
 -11  -2   1 0.04117 3.80048   1
 -11   2   1 -1.4621  3.2735   1
  11   2  -1 1.55815 4.12932   1
  10  -2  -1 36.5120  5.5766   3
 -10  -2   1 41.5093  7.4286   1
  10  -2  -1 42.8359  7.4867   1
  10   2  -1 36.1690  6.8915   1
 -10   2   1 33.3938  6.8050   1
  10   2  -1 36.5411  5.8439   3
   9  -2  -1 17.8114  4.9592   1
  -9  -2   1 20.2910  5.1516   1
   9  -2  -1 11.2145  3.8389   3
  -9   2   1 7.50668 4.02008   1
   9   2  -1 13.3352  4.6530   1
   9   2  -1 13.0595  4.2273   3
   8  -2  -1 3.32279 3.56823   1
   8  -2  -1 -0.0327  2.6703   3
  -8  -2   1 1.23477 3.43730   1
   8   2  -1 1.18287 3.10585   3
   8   2  -1 4.83429 3.66903   1
  -8   2   1 2.70488 3.63999   1
  -7  -2   1 141.869   9.631   1
   7  -2  -1 131.138   8.168   3
   7  -2  -1 124.912   9.229   1
  -7   2   1 132.308   9.116   1
   7   2  -1 142.589   9.628   1
   7   2  -1 136.528   8.594   3
  -6  -2   1 37.2730  5.0206   1
   6  -2  -1 39.8082  5.2659   1
   6  -2  -1 37.5388  4.4960   3
   6   2  -1 28.1072  4.7773   1
   6   2  -1 37.4886  4.6647   3
  -6   2   1 35.3155  5.0579   1
  -5  -2   1 96.9185  6.6771   1
   5  -2  -1 95.7941  6.0386   3
   5  -2  -1 103.618   6.792   1
  -5   2   1 91.4057  6.6853   1
   5   2  -1 93.5427  6.4753   1
   5   2  -1 93.2326  6.4083   3
  -4  -2   1 144.762   7.358   1
   4  -2  -1 119.396   7.119   1
   4  -2  -1 133.001   6.758   3
   4   2  -1 130.287   7.360   1
   4   2  -1 134.094   7.162   3
  -4   2   1 132.803   7.278   1
   3  -2  -1 3.13085 2.08685   1
  -3  -2   1 3.18751 1.94240   1
   3  -2  -1 1.37472 1.84039   3
   3   2  -1 2.86254 1.90500   1
   3   2  -1 5.07449 2.10746   3
  -3   2   1 5.34241 2.12770   1
   2  -2  -1 357.808  13.013   3
   2  -2  -1 360.810  12.008   2
   2  -2  -1 350.246  12.562   1
  -2  -2   1 398.001  12.779   1
  -2  -2   1 364.192  12.603   1
   2   2  -1 384.447  13.250   3
  -2   2   1 361.912  12.645   1
   2   2  -1 356.023  12.699   1
   1  -2  -1 -2.8514  0.6617   3
  -1  -2   1 -3.7067  0.4868   5
  -1  -2   1 -3.2636  0.4750   1
   1   2  -1 -3.1079  0.5081   5
  -1   2   1 -2.6992  0.5190   1
   1   2  -1 -1.4984  0.8018   1
   0  -2  -1 -1.2771  0.2829   4
   0  -2   1 -0.8907  0.4403   4
   0  -2   1 -0.9824  0.3471   1
   0  -2  -1 -0.4815  0.3920   1
   0   2   1 -1.1940  0.3526   1
   0   2  -1 -1.0155  0.4050   4
   0   2  -1 -0.6971  0.4480   1
   0   2   1 -0.9471  0.4404   4
   1   2   1 2.13817 0.93762   1
  -1   2  -1 0.45990 0.50123   2
   2  -2   1 2900.25   91.93   1
  -2  -2  -1 3113.25   91.96   1
  -2   2  -1 3063.32   90.95   2
  -2   2  -1 3014.64   91.92   1
   2   2   1 3022.34   92.06   1
  -3  -2  -1 86.5643  5.2259   1
   3  -2   1 76.0605  5.2883   1
  -3   2  -1 81.6386  3.3500   2
   3   2   1 65.3257  5.1485   1
  -3   2  -1 78.7609  5.3936   1
   4  -2   1 3.16931 2.28119   1
  -4  -2  -1 2.04029 1.97464   1
  -4   2  -1 1.51310 2.02837   1
   4   2   1 1.71111 1.56448   3
   4   2   1 0.03225 2.24178   1
   5  -2   1 46.0206  3.5569   3
   5  -2   1 42.8315  5.2442   1
  -5  -2  -1 50.5671  5.5609   1
   5   2   1 50.2228  4.1027   3
  -5   2  -1 48.2241  5.3446   1
   5   2   1 59.9356  6.3103   1
   6  -2   1 24.7512  4.8501   1
  -6  -2  -1 15.0685  4.0642   1
   6  -2   1 21.8864  2.9344   3
  -6   2  -1 26.4140  4.8238   1
   6   2   1 13.0758  4.1846   1
   6   2   1 21.9099  3.2442   3
  -7  -2  -1 -0.7565  2.7986   1
   7  -2   1 1.62701 3.31167   1
  -7   2  -1 1.69259 3.33517   1
   7   2   1 7.68165 2.69121   3
   7   2   1 6.11833 3.90832   1
   8  -2   1 0.89856 3.90043   1
  -8  -2  -1 1.52303 3.27663   1
   8   2   1 -3.2347  3.6037   1
   8   2   1 -1.1007  2.1831   3
  -8   2  -1 -0.0799  3.4518   1
   9  -2   1 108.603  10.916   1
  -9  -2  -1 98.2124 10.6087   1
  -9   2  -1 105.245  10.782   1
   9   2   1 106.624   6.958   3
   9   2   1 97.5303 10.4480   1
  10  -2   1 17.9215  5.5130   1
 -10  -2  -1 11.9022  4.9607   1
 -10   2  -1 5.22093 4.14434   1
  10   2   1 8.27776 4.45598   1
  11  -2   1 12.5562  5.9762   1
 -11  -2  -1 13.4912  5.8548   1
 -11   2  -1 20.6416  6.6597   1
  11   2   1 30.6523  7.4796   1
 -12  -2  -1 8.74905 5.94154   1
  12  -2   1 6.63549 5.52940   1
 -12   2  -1 9.58560 5.93968   1
  12   2   1 7.57079 5.66051   1
  13  -2   1 3.33123 5.40152   1
 -13  -2  -1 -2.3435  4.4026   1
  13   2   1 -3.5485  5.1118   1
 -13   2  -1 6.17820 5.95857   1
 -14  -2  -1 -1.6982  4.9622   1
 -14   2  -1 0.23637 5.77253   1
 -14  -3   1 7.21720 6.20553   1
 -14   3   1 13.5718  6.7492   1
 -13  -3   1 4.89758 6.11704   1
 -13   3   1 -1.0980  4.9883   1
 -12  -3   1 108.338  13.093   1
  12  -3  -1 90.3944 11.5533   1
 -12   3   1 98.5730 12.4520   1
  12   3  -1 92.9976 11.4402   1
 -11  -3   1 10.1956  5.4020   1
  11  -3  -1 14.5033  5.3850   1
  11   3  -1 16.8560  5.6556   1
 -11   3   1 2.12204 4.09937   1
  10  -3  -1 11.0761  4.7284   1
 -10  -3   1 8.79079 4.82380   1
  10   3  -1 10.2576  4.1331   3
  10   3  -1 11.6575  4.7808   1
 -10   3   1 2.00921 3.86253   1
   9  -3  -1 75.9507  7.1833   3
  -9  -3   1 71.5758  8.6672   1
   9  -3  -1 72.4035  8.5949   1
   9   3  -1 69.9291  7.3531   3
   9   3  -1 78.6458  9.0796   1
  -9   3   1 76.5288  9.1952   1
  -8  -3   1 56.3087  7.4715   1
   8  -3  -1 66.2710  6.5245   3
   8  -3  -1 57.7554  7.5444   1
  -8   3   1 60.3476  7.8299   1
   8   3  -1 76.6875  8.4748   1
   8   3  -1 58.0445  6.6449   3
   7  -3  -1 177.598  10.595   1
  -7  -3   1 175.882  10.865   1
   7  -3  -1 169.857   9.646   3
   7   3  -1 187.068  10.216   3
  -7   3   1 164.137  10.627   1
   7   3  -1 170.566  10.779   1
   6  -3  -1 234.147  12.055   1
  -6  -3   1 245.164  12.042   1
   6  -3  -1 240.466  11.096   3
   6   3  -1 247.917  12.330   1
  -6   3   1 229.435  11.959   1
   6   3  -1 244.607  11.454   3
   5  -3  -1 23.0283  3.8203   1
   5  -3  -1 21.4852  3.3486   3
  -5  -3   1 17.1715  3.4158   1
   5   3  -1 27.8397  3.9237   3
  -5   3   1 21.0794  3.9000   1
   5   3  -1 25.0271  4.0253   1
  -4  -3   1 18.6529  3.1926   1
   4  -3  -1 18.7452  2.8843   3
   4  -3  -1 19.8131  3.2867   1
  -4   3   1 15.9374  3.0543   1
   4   3  -1 16.1073  3.2124   1
   4   3  -1 15.4243  2.9197   3
   3  -3  -1 871.335  29.407   1
  -3  -3   1 922.076  29.670   1
   3  -3  -1 919.133  28.142   2
   3  -3  -1 916.069  30.019   3
  -3   3   1 886.140  29.582   1
   3   3  -1 857.846  30.053   3
   3   3  -1 947.242  29.787   1
  -2  -3   1 1816.08   55.29   1
   2  -3  -1 1790.16   56.70   3
   2  -3  -1 1810.74   54.82   2
   2  -3  -1 1772.52   55.20   1
  -2   3   1 1821.38   55.32   1
   2   3  -1 1776.17   55.35   1
   1  -3  -1 127.569   4.567   2
   1  -3  -1 106.984   4.337   1
   1   3  -1 84.3496  4.3150   1
   0  -3   1 -1.2016  0.4357   1
   0  -3  -1 -0.4834  0.4220   4
   0  -3   1 -0.5131  0.5156   4
   0  -3   1 -1.0762  0.4740   5
   0   3   1 -0.7078  0.2945   5
   0   3   1 -0.4697  0.5548   4
   0   3  -1 -0.5739  0.5787   4
   0   3   1 -0.9561  0.4653   1
   0   3  -1 2.09451 0.82095   1
  -1  -3  -1 9.24722 1.45570   1
   1  -3   1 5.95620 1.38445   1
  -1  -3  -1 8.47418 1.42363   1
  -1   3  -1 8.36745 1.56009   1
   1   3   1 5.41742 1.37444   1
   2  -3   1 1162.18   34.88   2
   2  -3   1 1153.28   36.66   1
  -2  -3  -1 1160.15   36.51   1
  -2   3  -1 1124.43   36.50   1
   2   3   1 1134.87   36.63   1
   3  -3   1 2.31988 2.19752   1
  -3  -3  -1 1.97389 1.84962   1
   3   3   1 0.27079 2.12756   1
  -3   3  -1 2.93104 1.96805   1
   4  -3   1 18.8664  3.6756   1
  -4  -3  -1 20.7355  3.5162   1
   4   3   1 17.8168  3.5232   1
  -4   3  -1 20.8280  3.5136   1
   4   3   1 25.1148  2.8414   3
  -5  -3  -1 4.85317 2.72427   1
   5  -3   1 10.6171  3.2882   1
   5   3   1 8.79282 2.32381   3
   5   3   1 4.25984 3.07559   1
  -5   3  -1 7.77503 2.95464   1
   6  -3   1 410.688  18.298   1
  -6  -3  -1 410.673  18.194   1
  -6   3  -1 410.778  18.128   1
   6   3   1 445.880  16.216   3
   6   3   1 453.612  19.152   1
  -7  -3  -1 33.1276  5.5199   1
   7  -3   1 27.2706  5.4987   1
   7   3   1 27.2601  5.6987   1
   7   3   1 43.7305  4.6228   3
  -7   3  -1 31.8749  5.6871   1
  -8  -3  -1 141.840  10.543   1
   8  -3   1 149.127  11.221   1
   8   3   1 133.088  11.051   1
  -8   3  -1 153.943  11.178   1
   8   3   1 150.883   8.512   3
   9  -3   1 6.41136 4.43793   1
  -9  -3  -1 -1.1501  2.6963   1
   9   3   1 3.97114 4.01451   1
   9   3   1 0.90266 2.74981   3
  -9   3  -1 4.72924 3.83472   1
  10  -3   1 27.0717  6.5978   1
 -10  -3  -1 19.4559  5.9630   1
 -10   3  -1 19.5307  5.9018   1
  10   3   1 19.1184  6.0987   1
  11  -3   1 69.9713 10.3599   1
 -11  -3  -1 69.0232  9.9167   1
 -11   3  -1 63.7992 10.0487   1
  11   3   1 62.7737  9.7203   1
 -12  -3  -1 78.8709 11.5237   1
  12  -3   1 68.5665 10.4377   1
  12   3   1 52.9966  9.8562   1
 -12   3  -1 60.7030 10.2773   1
  13  -3   1 73.5228 11.5581   1
 -13  -3  -1 73.9738 12.1923   1
 -13   3  -1 102.747  13.557   1
  13   3   1 68.4676 11.3209   1
 -14  -3  -1 -2.8700  5.6153   1
 -14   3  -1 8.18932 6.65166   1
 -14  -4   1 -2.1111  5.1888   1
 -14   4   1 -0.5700  4.7514   1
 -13  -4   1 1.52729 5.36410   1
 -13   4   1 1.17410 4.99387   1
  12  -4  -1 34.9664  7.7631   1
 -12  -4   1 28.4801  7.2895   1
  12   4  -1 16.2293  6.2820   1
 -12   4   1 42.3006  8.5444   1
 -11  -4   1 14.0114  5.5148   1
  11  -4  -1 14.2934  5.5495   1
  11   4  -1 4.50064 4.85941   1
 -11   4   1 11.0152  5.3271   1
 -10  -4   1 27.8348  6.4822   1
  10  -4  -1 27.7506  6.1504   1
  10   4  -1 19.5867  4.9399   3
  10   4  -1 32.3247  6.7113   1
 -10   4   1 24.4951  6.3665   1
   9  -4  -1 21.9482  5.4225   1
  -9  -4   1 22.0813  5.6170   1
  -9   4   1 13.4901  4.8973   1
   9   4  -1 13.3158  4.9983   1
   9   4  -1 15.4064  4.4597   3
   8  -4  -1 7.63423 4.09562   1
  -8  -4   1 13.5525  4.4653   1
   8   4  -1 11.8425  4.5498   1
   8   4  -1 12.9615  4.2118   3
  -8   4   1 -0.7249  3.3829   1
   7  -4  -1 -3.6682  2.7330   1
  -7  -4   1 -2.4953  2.4431   1
   7  -4  -1 0.69606 2.73670   3
  -7   4   1 -2.7493  2.7058   1
   7   4  -1 -1.4808  3.1261   1
   7   4  -1 2.80140 2.91358   3
   6  -4  -1 7.20612 3.15807   1
  -6  -4   1 8.55214 3.27568   1
   6  -4  -1 11.2978  3.0590   3
  -6   4   1 1.00548 2.60744   1
   6   4  -1 5.73030 2.83572   3
   6   4  -1 11.0834  3.6401   1
   5  -4  -1 -1.4921  2.1014   3
   5  -4  -1 -1.0363  2.2403   1
  -5  -4   1 1.08791 2.07784   1
   5   4  -1 -0.3153  2.1820   3
  -5   4   1 2.22921 2.43974   1
   5   4  -1 -0.4394  2.3532   1
   4  -4  -1 26.4953  3.6109   1
  -4  -4   1 23.4167  3.3838   1
   4  -4  -1 23.3324  3.3049   3
   4   4  -1 19.7297  3.4504   1
  -4   4   1 18.2359  3.1838   1
   4   4  -1 22.7145  3.4364   3
   3  -4  -1 74.0154  5.1046   1
  -3  -4   1 73.7822  4.9748   1
   3  -4  -1 87.9235  3.7388   2
  -3  -4   1 69.8772  4.9157   1
   3   4  -1 87.5431  5.4820   3
  -3   4   1 73.1035  5.1480   1
   3   4  -1 85.7994  5.2242   1
   2  -4  -1 19.5364  2.4257   1
  -2  -4   1 13.9505  2.2910   1
   2  -4  -1 21.9090  2.0643   2
   2   4  -1 12.3607  2.3774   5
   2   4  -1 13.2845  2.4113   1
  -2   4   1 23.6494  2.7462   1
  -1  -4   1 26.4038  2.3971   1
   1  -4  -1 22.7488  2.2235   1
  -1  -4   1 20.4221  2.3596   5
   1   4  -1 20.5090  2.2012   1
  -1   4   1 27.2087  2.4291   1
   1   4  -1 17.2108  2.2134   5
   0  -4   1 2646.66   90.43   5
   0   4   1 3166.05   92.40   4
   0   4  -1 2783.97   92.68   4
   0   4  -1 2934.57   87.07   1
   1  -4   1 212.021   8.215   1
  -1  -4  -1 200.586   7.907   1
  -1   4  -1 214.717   8.095   1
   1   4   1 204.873   8.088   1
  -2  -4  -1 1248.19   39.94   1
   2  -4   1 1263.62   40.07   1
  -2   4  -1 1326.33   40.15   1
   2   4   1 1204.19   39.94   1
   3  -4   1 44.1321  4.5098   1
  -3  -4  -1 60.9369  4.4327   1
   3   4   1 58.9470  5.1702   1
  -3   4  -1 46.0787  4.4167   1
  -4  -4  -1 238.854  10.975   1
   4  -4   1 245.983  11.254   1
   4   4   1 250.810  11.548   1
  -4   4  -1 226.474  10.982   1
   5  -4   1 256.702  12.571   1
  -5  -4  -1 264.271  12.420   1
   5   4   1 272.782  11.143   3
   5   4   1 271.485  13.037   1
  -5   4  -1 262.197  12.491   1
   6  -4   1 95.7357  9.0190   1
  -6  -4  -1 131.629   8.893   1
   6   4   1 130.173   9.047   1
  -6   4  -1 131.379   8.803   1
   6   4   1 138.803   7.372   3
   7  -4   1 329.112  16.172   1
  -7  -4  -1 322.014  15.888   1
   7   4   1 303.656  13.276   3
  -7   4  -1 313.783  15.598   1
   7   4   1 301.481  15.776   1
  -8  -4  -1 28.5325  5.9837   1
   8  -4   1 34.2519  6.3872   1
   8   4   1 24.7777  5.9178   1
   8   4   1 36.4831  4.8386   3
  -8   4  -1 33.1399  6.1061   1
   9  -4   1 26.5146  6.1812   1
  -9  -4  -1 11.1901  4.7299   1
   9   4   1 38.7438  7.0432   1
  -9   4  -1 30.0268  6.3867   1
   9   4   1 23.4546  4.3816   3
 -10  -4  -1 47.8731  8.1057   1
  10  -4   1 46.2482  8.1301   1
  10   4   1 52.2170  8.7812   1
 -10   4  -1 53.9885  8.3361   1
 -11  -4  -1 12.1116  5.5045   1
  11  -4   1 1.01488 4.53691   1
 -11   4  -1 -3.0319  3.9413   1
  11   4   1 6.85256 5.46033   1
  12  -4   1 0.92872 4.59867   1
 -12  -4  -1 2.79370 4.81304   1
 -12   4  -1 14.3475  5.8634   1
  12   4   1 3.27746 4.98198   1
  13  -4   1 18.9801  6.7998   1
 -13  -4  -1 21.7538  7.8332   1
 -13   4  -1 17.6985  6.9423   1
  13   4   1 16.6089  6.9414   1
 -14  -4  -1 21.2732  8.3892   1
 -14   4  -1 18.0164  7.8119   1
 -14  -5   1 30.7835  8.7104   1
 -14   5   1 24.2567  8.6849   1
 -13  -5   1 0.88281 4.92312   1
 -13   5   1 5.44609 6.06972   1
  12  -5  -1 53.8770  9.3160   1
 -12  -5   1 76.1719 11.2490   1
  12   5  -1 75.6211 10.7898   1
 -12   5   1 87.1412 11.8246   1
 -11  -5   1 18.1839  5.9356   1
  11  -5  -1 36.7947  7.5979   1
 -11   5   1 26.1223  6.8955   1
  11   5  -1 20.7619  6.3545   1
 -10  -5   1 -1.7990  3.1537   1
  10  -5  -1 1.14897 3.57260   1
  10   5  -1 -2.6416  3.6361   3
  10   5  -1 2.95321 4.27609   1
 -10   5   1 -2.4707  3.6365   1
   9  -5  -1 9.13229 4.52960   1
  -9  -5   1 10.9816  4.6738   1
   9   5  -1 12.3306  4.3857   3
  -9   5   1 6.22332 3.95446   1
   9   5  -1 7.60631 4.44252   1
   8  -5  -1 368.152  18.240   1
  -8  -5   1 430.762  19.248   1
   8   5  -1 412.258  17.990   3
  -8   5   1 375.753  18.780   1
   8   5  -1 389.042  18.843   1
   7  -5  -1 498.903  20.746   1
  -7  -5   1 458.126  20.519   1
   7   5  -1 489.521  20.864   1
  -7   5   1 463.927  20.701   1
   7   5  -1 520.653  20.278   3
   6  -5  -1 95.2137  7.3304   1
  -6  -5   1 79.2941  6.6403   1
  -6   5   1 93.9125  7.1918   1
   6   5  -1 92.2748  8.1149   1
   6   5  -1 88.8814  6.8588   3
   5  -5  -1 189.499  10.034   1
  -5  -5   1 186.958   9.942   1
   5   5  -1 205.499  10.449   1
   5   5  -1 213.676  10.240   3
  -5   5   1 185.882   9.938   1
  -4  -5   1 23.8336  3.6329   1
   4  -5  -1 24.4702  3.6665   1
   4   5  -1 25.9199  3.6968   3
   4   5  -1 25.4914  3.9347   1
  -4   5   1 30.4824  3.9776   1
  -3  -5   1 127.681   6.643   1
   3  -5  -1 135.852   5.229   2
   3  -5  -1 123.148   6.662   1
  -3  -5   1 137.245   6.807   1
  -3   5   1 119.586   6.604   1
   3   5  -1 138.029   7.110   1
   2  -5  -1 463.668  15.773   1
  -2  -5   1 453.753  15.881   1
   2  -5  -1 453.666  15.016   2
   2   5  -1 436.813  15.900   1
  -2   5   1 461.879  15.876   1
   2   5  -1 438.913  16.786   5
  -1  -5   1 1214.81   38.66   5
  -1  -5   1 1178.31   38.89   4
   1  -5  -1 1124.05   36.70   1
  -1  -5   1 1188.95   36.90   1
   1   5  -1 1189.35   38.68   5
   1   5  -1 1166.83   36.94   1
  -1   5   1 1191.14   36.95   1
   0  -5  -1 411.799  13.226   5
   0  -5  -1 391.961  13.252   4
   0  -5   1 371.983  13.665   4
   0  -5  -1 401.660  13.446   1
   0  -5   1 382.094  14.037   5
   0  -5   1 390.480  13.521   1
   0   5  -1 387.448  13.748   4
   0   5   1 397.253  13.278   4
   0   5  -1 380.492  14.026   5
   0   5   1 413.038  13.622   1
   0   5  -1 390.354  13.508   1
   1  -5   1 53.3528  3.7902   1
  -1  -5  -1 62.8325  3.8737   1
   1   5   1 66.4244  4.0969   1
  -1   5  -1 64.7311  4.0717   1
  -2  -5  -1 129.453   6.288   1
   2  -5   1 121.352   6.386   1
  -2  -5  -1 122.070   6.171   1
   2   5   1 117.094   6.649   1
  -2   5  -1 125.122   6.495   1
   3  -5   1 3.03893 2.17014   1
  -3  -5  -1 -0.3311  1.8084   1
   3   5   1 -2.0612  2.1811   1
  -3   5  -1 0.04114 2.05339   1
   4  -5   1 3.33851 2.58374   1
  -4  -5  -1 3.43728 2.47922   1
  -4   5  -1 6.85595 2.66325   1
   4   5   1 0.75303 2.37977   1
   5  -5   1 36.0873  5.1530   1
  -5  -5  -1 39.7045  4.9536   1
  -5   5  -1 35.0352  5.0308   1
   5   5   1 39.1821  4.1611   3
   5   5   1 32.6125  4.9234   1
  -6  -5  -1 196.026  10.960   1
   6  -5   1 167.930  10.837   1
  -6   5  -1 187.232  11.050   1
   6   5   1 184.620  11.197   1
   6   5   1 180.775   9.225   3
  -7  -5  -1 2.69708 3.26224   1
   7  -5   1 0.12487 3.08601   1
   7   5   1 -0.4966  2.6153   3
  -7   5  -1 0.90401 2.96601   1
   7   5   1 -0.4217  3.4959   1
  -8  -5  -1 7.14083 4.52623   1
   8  -5   1 8.71845 4.57940   1
   8   5   1 17.5293  3.8990   3
   8   5   1 11.3444  4.9486   1
  -8   5  -1 23.8799  5.7608   1
   9  -5   1 33.2471  6.9096   1
  -9  -5  -1 36.2457  6.6053   1
  -9   5  -1 47.1424  7.7889   1
   9   5   1 51.7011  5.7599   3
   9   5   1 54.3639  7.9672   1
 -10  -5  -1 -0.2028  3.7592   1
  10  -5   1 3.17772 4.30949   1
  10   5   1 1.04377 4.10564   1
 -10   5  -1 3.41508 4.00863   1
 -11  -5  -1 123.106  13.294   1
  11  -5   1 110.413  12.526   1
 -11   5  -1 121.643  13.163   1
  11   5   1 111.035  12.995   1
  12  -5   1 5.38616 5.29923   1
 -12  -5  -1 -3.7314  4.4782   1
 -12   5  -1 -1.2149  4.3817   1
  12   5   1 6.10837 5.24777   1
  13  -5   1 -0.9128  4.6349   1
 -13  -5  -1 7.59857 5.95440   1
 -13   5  -1 -1.8460  4.8006   1
  13   5   1 1.90825 5.33336   1
 -14  -5  -1 6.18100 6.55090   1
 -14   5  -1 9.67934 6.66816   1
 -14  -6   1 2.51829 5.69219   1
 -14   6   1 -1.7129  4.6767   1
 -13  -6   1 -0.0831  4.6965   1
 -13   6   1 6.45562 6.54214   1
 -12  -6   1 -0.9817  4.4852   1
  12  -6  -1 -1.1375  4.8553   1
 -12   6   1 1.28313 4.94155   1
  12   6  -1 -2.6582  4.1796   1
  11  -6  -1 2.53729 4.59906   1
 -11  -6   1 1.83504 4.45156   1
 -11   6   1 -3.0840  4.0233   1
  11   6  -1 -2.0853  4.1456   1
  10  -6  -1 51.0885  7.9661   1
 -10  -6   1 46.7061  8.0437   1
  10   6  -1 49.0062  6.9157   3
 -10   6   1 37.8050  7.3361   1
  10   6  -1 45.9984  7.7738   1
   9  -6  -1 25.5337  5.9569   1
  -9  -6   1 19.6960  5.5425   1
  -9   6   1 25.5034  6.0973   1
   9   6  -1 29.2284  6.1627   1
   9   6  -1 28.6796  5.5104   3
   8  -6  -1 264.757  14.758   1
  -8  -6   1 273.730  14.834   1
   8   6  -1 273.502  14.813   1
   8   6  -1 264.293  13.982   3
  -8   6   1 272.804  15.205   1
   7  -6  -1 49.7131  6.5982   1
  -7  -6   1 64.8725  7.1866   1
   7   6  -1 65.9933  7.4927   1
   7   6  -1 74.7011  7.1941   3
  -7   6   1 49.7069  6.9097   1
   6  -6  -1 123.359   8.517   1
  -6  -6   1 128.681   8.458   1
  -6   6   1 97.9156  8.1462   1
   6   6  -1 126.796   8.513   3
   6   6  -1 151.209   9.209   1
  -5  -6   1 103.791   7.245   1
   5  -6  -1 114.005   7.544   1
  -5   6   1 93.4660  6.9561   1
   5   6  -1 107.393   7.543   1
   5   6  -1 124.102   7.587   3
  -4  -6   1 62.8260  5.2284   1
   4  -6  -1 57.5622  2.9983   2
   4  -6  -1 68.5394  5.4763   1
  -4   6   1 52.0852  5.2169   1
   4   6  -1 63.6265  5.7930   1
   3  -6  -1 305.940  10.782   2
   3  -6  -1 313.587  12.497   1
  -3  -6   1 319.625  12.549   1
  -3   6   1 304.163  12.581   1
   3   6  -1 325.578  12.838   1
   3   6  -1 315.267  13.431   5
   2  -6  -1 16.4106  2.4908   1
  -2  -6   1 9.51767 2.26927   1
   2   6  -1 11.1000  2.6010   1
   2   6  -1 13.9468  2.6723   5
  -2   6   1 11.8458  2.4699   1
  -1  -6   1 -1.5453  1.3007   5
  -1  -6   1 2.01591 1.39486   4
   1  -6  -1 3.60066 1.58756   1
  -1  -6   1 3.51230 1.63219   1
  -1   6   1 1.31668 1.69651   1
   1   6  -1 -1.2582  1.6363   1
   1   6  -1 -0.2210  1.4701   5
   0  -6   1 116.248   5.610   1
   0  -6  -1 121.995   5.057   5
   0  -6   1 112.498   5.737   5
   0  -6  -1 122.417   5.691   1
   0   6   1 121.227   5.049   5
   0   6  -1 120.038   5.208   4
   0   6  -1 114.683   5.782   1
   0   6  -1 122.035   5.825   5
   0   6   1 116.101   5.657   1
   0   6   1 109.104   4.562   4
   1  -6   1 17.1642  2.6452   1
  -1  -6  -1 17.2489  2.4952   1
   1   6   1 15.4537  2.2050   5
  -1   6  -1 14.0969  2.4562   1
   1   6   1 15.5277  2.6532   1
   2  -6   1 407.413  14.960   1
  -2  -6  -1 374.401  14.548   1
  -2  -6  -1 402.311  14.695   1
   2   6   1 377.055  14.820   1
  -2   6  -1 417.620  14.962   1
   3  -6   1 514.988  18.663   1
  -3  -6  -1 499.765  18.472   1
  -3   6  -1 515.215  18.615   1
   3   6   1 470.815  18.508   1
  -4  -6  -1 296.623  13.218   1
   4  -6   1 302.706  13.419   1
  -4   6  -1 308.241  13.447   1
   4   6   1 323.078  13.749   1
   5  -6   1 -1.7864  2.3928   1
  -5  -6  -1 1.04932 2.39310   1
  -5   6  -1 -1.1500  2.3703   1
   5   6   1 3.15730 2.79511   1
   6  -6   1 96.7565  8.9263   1
  -6  -6  -1 99.0554  8.1044   1
   6   6   1 100.726   9.257   1
  -6   6  -1 103.618   8.295   1
   6   6   1 103.597   6.897   3
   7  -6   1 233.436  12.920   1
  -7  -6  -1 196.851  12.068   1
   7   6   1 207.155  10.799   3
  -7   6  -1 230.514  13.088   1
   7   6   1 199.026  12.459   1
   8  -6   1 188.498  12.401   1
  -8  -6  -1 202.511  12.707   1
   8   6   1 193.567  10.480   3
  -8   6  -1 174.289  12.148   1
   8   6   1 192.785  13.218   1
   9  -6   1 16.3898  5.3750   1
  -9  -6  -1 14.4074  4.6703   1
  -9   6  -1 7.76930 4.56540   1
   9   6   1 12.6123  5.0943   1
   9   6   1 9.17687 3.70040   3
  10  -6   1 18.8148  5.9447   1
 -10  -6  -1 18.9673  5.6391   1
 -10   6  -1 17.2884  5.7971   1
  10   6   1 18.8859  6.0790   1
  11  -6   1 33.3779  7.5431   1
 -11  -6  -1 21.4656  6.2882   1
  11   6   1 12.4158  5.7922   1
 -11   6  -1 15.4514  5.8774   1
 -12  -6  -1 115.658  14.056   1
  12  -6   1 95.3950 12.5615   1
  12   6   1 122.161  13.816   1
 -12   6  -1 109.439  14.050   1
  13  -6   1 0.27534 5.00996   1
 -13  -6  -1 10.3340  6.2610   1
  13   6   1 2.81748 5.40984   1
 -13   6  -1 -3.6184  5.2527   1
 -14  -7   1 83.3246 13.1766   1
 -14   7   1 114.088  14.932   1
 -13  -7   1 113.824  14.389   1
 -13   7   1 128.894  15.103   1
 -12  -7   1 20.9856  6.7016   1
  12  -7  -1 20.7219  6.6948   1
 -12   7   1 27.8233  8.0105   1
  12   7  -1 21.7063  6.8889   1
  11  -7  -1 11.1189  5.4806   1
 -11  -7   1 20.9658  6.0107   1
 -11   7   1 14.3826  5.5768   1
  11   7  -1 19.6016  6.5355   1
  10  -7  -1 74.8469  9.5692   1
 -10  -7   1 58.9175  9.1430   1
 -10   7   1 58.7299  8.7056   1
  10   7  -1 61.5673  8.1803   3
  10   7  -1 51.4683  8.4640   1
  -9  -7   1 76.4853  9.2195   1
   9  -7  -1 72.7125  8.8669   1
   9   7  -1 60.6085  8.4852   1
  -9   7   1 75.0425  9.1670   1
   9   7  -1 75.0299  8.3002   3
   8  -7  -1 89.7118  9.1650   1
  -8  -7   1 91.2998  9.6190   1
  -8   7   1 81.9358  9.2029   1
   8   7  -1 87.0120  8.3689   3
   8   7  -1 77.2462  8.8764   1
   7  -7  -1 233.115  12.448   1
  -7  -7   1 194.535  11.974   1
   7   7  -1 214.361  11.766   3
   7   7  -1 213.027  12.540   1
  -7   7   1 222.774  12.534   1
  -6  -7   1 69.6876  7.0762   1
   6  -7  -1 71.3613  7.1499   1
  -6   7   1 54.1339  6.4078   1
   6   7  -1 63.1677  6.5007   3
   6   7  -1 61.7102  6.8197   1
  -5  -7   1 140.482   8.653   1
   5  -7  -1 153.404   8.985   1
  -5   7   1 157.858   9.193   1
   5   7  -1 140.642   8.673   3
   5   7  -1 143.700   8.972   1
   4  -7  -1 49.1343  2.8612   2
   4  -7  -1 55.2581  5.2828   1
  -4  -7   1 50.3055  5.0694   1
  -4  -7   1 43.7129  4.8317   1
   4   7  -1 37.9015  4.8639   5
   4   7  -1 51.9151  5.3512   1
  -4   7   1 60.8013  5.6611   1
   3  -7  -1 94.5792  5.9753   1
  -3  -7   1 85.0079  5.8940   1
   3  -7  -1 102.625   4.613   2
   3   7  -1 86.0313  6.1538   5
  -3   7   1 104.116   6.245   1
   3   7  -1 91.5745  6.1224   1
  -2  -7   1 608.627  21.606   1
   2  -7  -1 621.776  21.554   1
  -2  -7   1 615.418  22.695   5
   2   7  -1 653.562  22.959   5
   2   7  -1 648.800  21.855   1
  -2   7   1 631.187  21.788   1
   1  -7  -1 68.2775  4.2991   1
  -1  -7   1 66.4511  4.6219   1
  -1  -7   1 60.3735  4.4196   5
   1  -7  -1 76.1691  3.6977   5
  -1  -7   1 64.6336  3.8971   4
  -1   7   1 71.7123  4.7838   1
   1   7  -1 62.9995  4.6678   1
   1   7  -1 69.6589  4.6066   5
   0  -7  -1 763.548  24.765   5
   0  -7   1 778.123  25.765   5
   0  -7   1 713.647  24.638   1
   0  -7  -1 733.681  24.635   1
   0   7  -1 738.116  25.641   5
   0   7   1 757.326  24.793   5
   0   7  -1 746.835  25.174   4
  -1  -7  -1 2771.54   86.83   1
   1  -7   1 2856.00   87.06   1
   1   7   1 2913.60   89.78   5
   1   7   1 2817.74   87.08   1
  -1   7  -1 2826.79   87.03   1
  -2  -7  -1 1249.84   39.93   1
   2  -7   1 1246.85   40.14   1
  -2   7  -1 1244.23   40.09   1
   2   7   1 1206.28   40.09   1
  -3  -7  -1 900.583  29.821   1
   3  -7   1 861.432  29.880   1
  -3   7  -1 860.720  29.682   1
   3   7   1 843.025  29.665   1
   4  -7   1 73.9648  6.6227   1
  -4  -7  -1 74.4391  5.7455   1
  -4   7  -1 61.5527  6.0746   1
   4   7   1 75.4939  6.1402   1
   5  -7   1 53.3612  6.0504   1
  -5  -7  -1 56.2489  6.0862   1
   5   7   1 62.0414  6.5237   1
  -5   7  -1 64.7823  6.4887   1
   6  -7   1 82.3156  8.0203   1
  -6  -7  -1 84.5887  8.0571   1
   6   7   1 81.4720  6.5022   3
   6   7   1 88.1925  8.5197   1
  -6   7  -1 79.9100  8.0530   1
  -7  -7  -1 38.7421  6.4487   1
   7  -7   1 62.1283  7.6001   1
   7   7   1 54.9661  7.3641   1
   7   7   1 51.9454  5.9007   3
  -7   7  -1 56.0920  7.4738   1
   8  -7   1 751.389  30.728   1
  -8  -7  -1 759.848  30.861   1
  -8   7  -1 715.703  30.708   1
   8   7   1 820.012  31.838   1
   8   7   1 761.973  28.337   3
   9  -7   1 385.290  20.022   1
  -9  -7  -1 394.589  20.000   1
   9   7   1 389.661  20.511   1
  -9   7  -1 386.399  20.240   1
   9   7   1 387.724  17.183   3
  10  -7   1 2.99085 4.11372   1
 -10  -7  -1 10.4184  5.0712   1
 -10   7  -1 8.18342 5.29763   1
  10   7   1 -2.7410  3.6576   1
  11  -7   1 53.4880  9.2976   1
 -11  -7  -1 37.6904  7.8308   1
 -11   7  -1 58.7243  9.5465   1
  11   7   1 65.7061 10.0712   1
 -12  -7  -1 245.936  17.788   1
  12  -7   1 206.209  16.174   1
 -12   7  -1 248.838  17.708   1
  12   7   1 215.840  16.649   1
 -13  -7  -1 60.6486 11.0174   1
  13  -7   1 57.1767 10.6066   1
 -13   7  -1 43.6104  9.9346   1
  13   7   1 72.4079 11.6575   1
 -13  -8   1 19.0035  7.2220   1
 -13   8   1 7.10642 5.95913   1
 -12  -8   1 1.59346 3.96601   1
 -12   8   1 0.78501 4.79974   1
  12   8  -1 6.06665 5.28114   1
 -11  -8   1 48.7685  8.6068   1
  11  -8  -1 37.4991  7.9783   1
  11   8  -1 42.2471  7.9799   1
 -11   8   1 44.8635  8.6474   1
  10  -8  -1 1.32343 4.17379   1
 -10  -8   1 1.34265 3.60484   1
  10   8  -1 -2.5535  3.8959   3
  10   8  -1 -2.7829  3.9488   1
 -10   8   1 0.06442 4.06268   1
   9  -8  -1 208.052  13.222   1
  -9  -8   1 167.413  12.371   1
   9   8  -1 169.045  11.519   3
   9   8  -1 161.469  12.262   1
  -9   8   1 174.375  12.458   1
  -8  -8   1 184.436  12.512   1
   8  -8  -1 232.464  13.458   1
   8   8  -1 201.400  13.113   1
   8   8  -1 203.550  12.107   3
  -8   8   1 211.308  13.168   1
   7  -8  -1 20.9184  4.7734   1
  -7  -8   1 27.7242  5.4206   1
  -7   8   1 28.0109  5.6193   1
   7   8  -1 36.7179  5.5818   3
   7   8  -1 30.9665  5.5219   1
  -6  -8   1 71.7500  7.3384   1
   6  -8  -1 74.8455  7.4607   1
   6   8  -1 48.2585  6.4822   1
  -6   8   1 72.0777  7.3411   1
   6   8  -1 58.2693  6.5297   3
  -5  -8   1 80.0023  6.4591   1
   5  -8  -1 93.4906  6.9511   1
  -5   8   1 69.2467  6.8022   1
   5   8  -1 74.9427  7.1380   1
   5   8  -1 91.1065  6.9966   3
  -4  -8   1 195.836  10.055   1
   4  -8  -1 216.222  10.066   1
  -4  -8   1 188.988   9.960   1
   4  -8  -1 207.360   7.647   2
   4   8  -1 203.566  10.121   1
   4   8  -1 210.181  10.848   5
  -4   8   1 196.920  10.064   1
   3  -8  -1 5.27304 2.29744   1
  -3  -8   1 4.03916 2.26170   1
   3   8  -1 4.90810 2.66864   1
  -3   8   1 6.25549 2.50297   1
   3   8  -1 6.77180 2.42258   5
  -2  -8   1 908.077  30.605   1
   2  -8  -1 996.639  30.744   1
  -2  -8   1 886.533  31.901   5
   2   8  -1 890.065  32.057   5
   2   8  -1 884.654  30.606   1
  -2   8   1 963.744  30.860   1
   1  -8  -1 14.8173  2.7149   1
  -1  -8   1 17.6353  2.8708   1
   1  -8  -1 15.4170  1.9881   5
  -1  -8   1 19.5175  2.8115   5
  -1  -8   1 19.4674  2.1526   4
  -1   8   1 16.6624  2.8440   1
   1   8  -1 15.3665  2.6889   5
   1   8  -1 16.7918  2.8155   1
   0  -8   1 4.66959 1.94611   1
   0  -8   1 3.40097 1.70679   5
   0  -8  -1 6.02463 2.06626   1
   0  -8  -1 5.34456 1.47725   5
   0   8  -1 8.27993 2.16979   5
   0   8  -1 10.9626  2.4658   1
   0   8   1 7.62864 2.15487   1
   0   8  -1 5.67960 1.54621   4
   0   8   1 4.60924 1.49621   5
   0   8   1 2.83142 0.79243   4
  -1  -8  -1 14.9573  2.5726   1
   1  -8   1 8.12196 2.41593   1
   1   8   1 10.3166  2.0854   5
   1   8   1 13.8619  2.7184   1
  -1   8  -1 9.92307 2.39485   1
  -2  -8  -1 42.8974  4.3398   1
   2  -8   1 26.0829  3.6416   1
   2   8   1 37.2438  3.8273   5
  -2   8  -1 37.8011  4.2084   1
   2   8   1 45.8035  4.4985   1
  -3  -8  -1 698.230  24.546   1
   3  -8   1 705.357  24.823   1
  -3  -8  -1 687.473  24.543   1
  -3   8  -1 672.717  24.595   1
   3   8   1 688.337  24.795   1
   4  -8   1 345.647  15.124   1
  -4  -8  -1 344.897  14.791   1
   4   8   1 344.899  15.172   1
  -4   8  -1 342.129  14.941   1
  -5  -8  -1 5.75667 2.86079   1
   5  -8   1 1.22836 2.57212   1
   5   8   1 6.66650 3.20755   1
  -5   8  -1 4.09599 3.04712   1
  -6  -8  -1 265.597  14.068   1
   6  -8   1 290.832  14.720   1
  -6   8  -1 286.847  14.300   1
   6   8   1 273.530  14.538   1
  -7  -8  -1 10.7232  4.1149   1
   7  -8   1 7.32919 3.89522   1
  -7   8  -1 7.19085 3.97565   1
   7   8   1 5.94938 3.71716   1
   7   8   1 7.99836 3.43115   3
   8  -8   1 54.8465  7.6097   1
  -8  -8  -1 35.4850  6.7038   1
   8   8   1 26.6727  6.3990   1
   8   8   1 47.1152  6.0834   3
  -8   8  -1 43.8873  7.1664   1
  -9  -8  -1 3.50170 4.04809   1
   9  -8   1 1.72858 4.18225   1
   9   8   1 5.57059 4.51584   1
   9   8   1 8.72124 3.92755   3
  -9   8  -1 0.53380 3.66764   1
  10  -8   1 150.132  12.417   1
 -10  -8  -1 125.283  13.081   1
  10   8   1 114.704  12.596   1
 -10   8  -1 136.114  13.268   1
 -11  -8  -1 43.2049  8.5057   1
  11  -8   1 62.9451  9.7986   1
  11   8   1 41.5435  8.3746   1
 -11   8  -1 53.2818  9.3394   1
 -12  -8  -1 52.3480 10.1041   1
  12  -8   1 62.0013 10.2179   1
  12   8   1 68.5551 10.7852   1
 -12   8  -1 68.2176 11.1606   1
  13  -8   1 3.04027 6.05729   1
 -13  -8  -1 9.66965 5.72459   1
  13   8   1 15.7069  7.3834   1
 -13   8  -1 16.4489  7.2972   1
 -13  -9   1 66.0664 11.2311   1
 -13   9   1 42.6635  9.5893   1
 -12  -9   1 26.3008  7.0810   1
 -12   9   1 55.1802  9.7974   1
  12   9  -1 42.4524  8.5366   1
 -11  -9   1 1.75383 4.63235   1
  11  -9  -1 8.14417 5.53596   1
  11   9  -1 19.2283  6.1520   1
 -11   9   1 8.77269 4.94014   1
 -10  -9   1 130.519  13.147   1
  10  -9  -1 123.591  12.359   1
  10   9  -1 120.858  12.226   1
  10   9  -1 120.314  11.245   3
 -10   9   1 116.419  12.334   1
  -9  -9   1 19.1953  5.5053   1
   9  -9  -1 24.1809  5.8647   1
   9   9  -1 31.3140  6.1121   3
  -9   9   1 30.8404  6.3494   1
   9   9  -1 42.0977  7.2858   1
   8  -9  -1 208.041  12.962   1
  -8  -9   1 202.801  12.930   1
   8   9  -1 184.812  12.108   3
  -8   9   1 224.244  13.178   1
   8   9  -1 197.443  12.964   1
  -7  -9   1 48.1767  6.6487   1
   7  -9  -1 44.2915  6.4275   1
  -7   9   1 48.3208  6.8853   1
   7   9  -1 56.1129  6.8702   3
   7   9  -1 51.1170  6.9042   1
   6  -9  -1 0.58851 2.65599   1
  -6  -9   1 -0.8280  2.3704   1
   6   9  -1 2.28780 2.90913   3
   6   9  -1 3.03104 2.96591   1
  -6   9   1 -3.2713  2.3120   1
   5  -9  -1 26.0018  2.0959   2
  -5  -9   1 22.4230  4.0230   1
   5  -9  -1 26.4361  4.3534   1
  -5   9   1 24.2013  4.4285   1
   5   9  -1 25.6709  4.5967   1
   5   9  -1 28.7047  4.7832   5
  -4  -9   1 52.3883  5.6035   1
  -4  -9   1 57.3279  5.7958   1
   4  -9  -1 50.9358  3.3654   2
   4  -9  -1 55.7820  5.5301   1
   4   9  -1 46.2944  5.4099   1
   4   9  -1 52.8973  5.6750   5
  -4   9   1 55.9771  5.7656   1
  -3  -9   1 79.8334  5.7695   1
   3  -9  -1 84.3122  5.9687   1
   3   9  -1 77.9536  6.0363   5
   3   9  -1 79.8075  6.1794   1
  -3   9   1 92.2980  6.0979   1
  -2  -9   1 193.813   9.580   5
   2  -9  -1 215.368   9.335   1
  -2  -9   1 199.514   9.412   1
   2   9  -1 204.832   9.905   5
   2   9  -1 193.915   9.427   1
  -2   9   1 204.973   9.586   1
  -1  -9   1 23.6853  2.2633   4
  -1  -9   1 15.8164  2.7664   5
  -1  -9   1 23.5045  3.2877   1
   1  -9  -1 20.1431  3.1056   1
   1  -9  -1 23.8828  2.4770   5
   1   9  -1 30.5336  3.7550   5
  -1   9   1 22.6339  3.2610   1
   1   9  -1 27.0679  3.5985   1
   0  -9   1 77.7598  5.3611   1
   0  -9  -1 73.2785  4.8908   1
   0  -9   1 76.7394  4.9085   5
   0  -9  -1 76.3888  4.2522   5
   0   9  -1 72.7456  5.0877   1
   0   9   1 63.6645  5.0884   1
   0   9   1 66.6530  4.1809   5
   0   9  -1 74.8641  4.9292   5
   0   9  -1 77.8947  3.9968   4
   1  -9   1 248.770  11.062   1
  -1  -9  -1 261.897   9.377   4
  -1  -9  -1 271.788  11.184   1
   1   9   1 260.322  11.355   1
  -1   9  -1 289.006  11.499   1
   1   9   1 267.619  10.942   5
   2  -9   1 18.9618  3.3165   1
  -2  -9  -1 22.4750  3.4086   1
  -2   9  -1 14.4937  3.0195   1
   2   9   1 22.4662  3.2778   5
   2   9   1 27.3890  3.9116   1
   3  -9   1 121.416   7.786   1
  -3  -9  -1 139.491   7.945   1
  -3  -9  -1 141.455   7.920   1
  -3   9  -1 123.937   7.581   1
   3   9   1 133.211   8.273   1
   4  -9   1 4.00555 2.76455   1
  -4  -9  -1 0.63882 2.15071   1
  -4   9  -1 0.95159 2.36483   1
   4   9   1 5.16721 2.75743   1
  -5  -9  -1 6.17426 3.12597   1
   5  -9   1 7.18547 3.24695   1
  -5   9  -1 3.67768 3.06707   1
   5   9   1 6.82579 3.43593   1
   6  -9   1 53.5123  6.8571   1
  -6  -9  -1 71.5134  7.5852   1
   6   9   1 59.4053  7.5727   1
  -6   9  -1 61.4368  7.4395   1
  -7  -9  -1 1.14990 3.34575   1
   7  -9   1 7.25266 3.82328   1
   7   9   1 5.56040 3.45084   3
   7   9   1 9.21990 4.44550   1
  -7   9  -1 12.1336  4.5844   1
   8  -9   1 -2.6630  3.4017   1
  -8  -9  -1 -3.4823  3.1099   1
   8   9   1 0.77456 3.73081   1
  -8   9  -1 5.17964 3.95127   1
   8   9   1 0.84774 3.44822   3
  -9  -9  -1 199.467  13.593   1
   9  -9   1 200.575  14.082   1
  -9   9  -1 215.151  14.261   1
   9   9   1 211.719  14.656   1
   9   9   1 185.528  11.725   3
 -10  -9  -1 66.1376  9.8909   1
  10  -9   1 56.6977  8.9834   1
 -10   9  -1 82.5068 10.4601   1
  10   9   1 81.7248 10.8657   1
 -11  -9  -1 13.0913  5.8270   1
  11  -9   1 18.5546  6.2433   1
 -11   9  -1 15.0219  5.9875   1
  11   9   1 7.42246 5.59701   1
 -12  -9  -1 16.4254  6.4930   1
  12  -9   1 20.7292  6.9050   1
  12   9   1 15.2993  6.3862   1
 -12   9  -1 13.5319  6.6084   1
 -13  -9  -1 63.2476 11.3059   1
  13  -9   1 36.0423  9.1459   1
  13   9   1 53.1128 10.5787   1
 -13   9  -1 62.7255 11.1850   1
 -13 -10   1 0.69869 5.10033   1
 -13  10   1 13.1036  6.5584   1
 -12 -10   1 41.2976  8.8291   1
  12  10  -1 42.8886  8.8031   1
 -12  10   1 34.9032  8.1581   1
  11 -10  -1 73.2377 10.0357   1
 -11 -10   1 80.0823 11.2451   1
 -11  10   1 65.9304 10.1390   1
  11  10  -1 55.9172  9.2683   1
 -10 -10   1 4.06476 4.20162   1
  10 -10  -1 3.09465 4.08926   1
  10  10  -1 0.83441 4.43249   1
 -10  10   1 3.13299 4.16754   1
  10  10  -1 4.66495 4.58335   3
  -9 -10   1 110.058  11.485   1
   9 -10  -1 111.700  10.957   1
   9  10  -1 98.4735  9.8193   3
  -9  10   1 95.4549 10.7566   1
   9  10  -1 109.224  11.209   1
   8 -10  -1 56.3708  7.5926   1
  -8 -10   1 53.3288  7.6234   1
   8  10  -1 48.5752  7.4436   1
  -8  10   1 55.6699  8.0645   1
   8  10  -1 55.8774  7.3543   3
  -7 -10   1 154.494  10.474   1
   7 -10  -1 133.387  10.172   1
   7  10  -1 138.718  10.479   1
  -7  10   1 168.962  10.914   1
   7  10  -1 145.516  10.284   3
   7  10  -1 131.059  10.542   5
   6 -10  -1 5.63152 3.29229   1
  -6 -10   1 -1.0452  2.5283   1
  -6  10   1 2.48613 2.92689   1
   6  10  -1 4.52861 3.44929   3
   6  10  -1 3.21471 2.85554   5
   6  10  -1 5.59678 3.61701   1
  -5 -10   1 19.5464  3.9854   1
   5 -10  -1 33.0085  4.8962   1
   5 -10  -1 30.4685  2.5020   2
  -5 -10   1 31.1452  4.8240   1
   5  10  -1 33.5580  5.1897   5
   5  10  -1 35.6305  5.1901   1
  -5  10   1 40.1226  5.3213   1
   4 -10  -1 105.571   7.217   1
   4 -10  -1 111.170   5.264   2
  -4 -10   1 93.9777  7.1275   1
   4  10  -1 107.669   7.634   5
   4  10  -1 105.763   7.186   1
  -4  10   1 95.7685  6.9674   1
  -3 -10   1 498.515  18.519   1
   3 -10  -1 477.194  18.171   1
  -3  10   1 475.603  18.374   1
   3  10  -1 453.668  18.339   1
   3  10  -1 448.207  19.024   5
  -2 -10   1 744.909  26.011   1
  -2 -10   1 760.962  25.943   4
   2 -10  -1 733.194  25.724   1
  -2 -10   1 731.289  26.932   5
   2  10  -1 742.586  26.135   1
   2  10  -1 757.276  27.226   5
  -2  10   1 728.206  26.006   1
  -1 -10   1 0.18839 1.90553   1
   1 -10  -1 1.25032 1.84983   1
  -1 -10   1 -0.1974  1.4541   5
   1 -10  -1 3.21669 1.45593   5
  -1 -10   1 1.92927 1.21319   4
   1  10  -1 1.13013 2.06832   1
  -1  10   1 3.12067 2.17705   1
   1  10  -1 1.40237 1.83414   5
   0 -10   1 3.74787 1.88525   5
   0 -10  -1 5.79336 1.63848   5
   0 -10   1 7.58302 2.42350   1
   0 -10  -1 4.72914 2.20304   1
   0  10  -1 7.36109 1.58341   4
   0  10   1 1.44894 2.20176   1
   0  10  -1 6.04932 2.09629   5
   0  10   1 5.76715 1.79483   5
   0  10  -1 5.62796 2.50078   1
   1 -10   1 1145.72   37.31   1
   1 -10   1 1169.62   38.26   5
  -1 -10  -1 1111.41   36.98   1
   1  10   1 1127.64   37.75   5
  -1  10  -1 1090.38   37.15   1
   1  10   1 1102.94   37.28   1
   2 -10   1 220.403  10.543   1
  -2 -10  -1 224.333  10.490   1
  -2  10  -1 220.593  10.540   1
   2  10   1 223.938  10.343   5
   2  10   1 217.460  10.686   1
   3 -10   1 253.399  11.991   1
  -3 -10  -1 241.025  11.415   1
  -3 -10  -1 245.854  11.491   1
  -3  10  -1 240.980  11.639   1
   3  10   1 275.558  12.247   5
   3  10   1 244.732  11.862   1
  -4 -10  -1 29.7492  4.5046   1
   4 -10   1 47.9255  5.5670   1
   4  10   1 47.2098  5.5905   1
  -4  10  -1 46.1120  5.4921   1
   5 -10   1 148.139   9.367   1
  -5 -10  -1 135.285   9.032   1
   5  10   1 133.188   9.480   1
  -5  10  -1 139.908   9.486   1
   6 -10   1 181.033  11.425   1
  -6 -10  -1 157.811  10.472   1
   6  10   1 155.805  10.601   1
  -6  10  -1 154.130  10.735   1
  -7 -10  -1 22.3456  5.1997   1
   7 -10   1 19.1904  5.3761   1
   7  10   1 24.3718  4.8407   3
   7  10   1 17.5498  5.1351   1
  -7  10  -1 17.8925  5.1184   1
  -8 -10  -1 189.155  12.812   1
   8 -10   1 206.090  13.600   1
   8  10   1 189.697  13.160   1
  -8  10  -1 216.937  13.683   1
   8  10   1 184.622  11.299   3
   9 -10   1 1.02794 4.19445   1
  -9 -10  -1 8.36193 4.69045   1
   9  10   1 8.85987 4.17982   3
  -9  10  -1 3.44027 4.37054   1
   9  10   1 6.98198 4.62247   1
  10 -10   1 16.9307  6.2635   1
 -10 -10  -1 18.8357  6.1970   1
  10  10   1 10.6235  5.1145   1
 -10  10  -1 25.3807  6.8152   1
 -11 -10  -1 36.9142  8.2417   1
  11 -10   1 36.2440  8.0736   1
 -11  10  -1 78.3102 10.8823   1
  11  10   1 67.4186 10.6150   1
 -12 -10  -1 26.5214  7.5302   1
  12 -10   1 22.0980  7.3275   1
  12  10   1 22.3785  7.1469   1
 -12  10  -1 20.9479  7.3758   1
  13 -10   1 2.16084 5.49016   1
 -13 -10  -1 0.76140 5.63312   1
 -13  10  -1 11.7964  6.7568   1
  13  10   1 5.31428 5.98384   1
 -13 -11   1 24.3651  7.7699   1
 -13  11   1 31.8757  8.6297   1
 -12 -11   1 7.01443 5.64251   1
 -12  11   1 1.35479 4.61117   1
 -11 -11   1 16.2167  6.0200   1
  11 -11  -1 21.4634  6.3773   1
  11  11  -1 15.2016  5.8559   1
 -11  11   1 13.9706  5.8241   1
 -10 -11   1 139.104  14.086   1
  10 -11  -1 165.216  12.860   1
  10  11  -1 198.190  14.048   1
 -10  11   1 140.639  14.149   1
  10  11  -1 177.010  12.558   3
  -9 -11   1 27.2107  6.2993   1
   9 -11  -1 40.7352  7.1079   1
   9  11  -1 29.1891  6.5969   1
   9  11  -1 28.2476  6.5390   5
   9  11  -1 42.4641  6.8585   3
  -9  11   1 36.4061  7.1204   1
  -8 -11   1 -1.8205  2.9218   1
   8 -11  -1 -3.4648  3.1350   1
   8  11  -1 3.20908 3.77632   3
   8  11  -1 2.34607 3.93853   1
   8  11  -1 -6.2717  2.2763   5
  -8  11   1 1.81871 3.09100   1
  -7 -11   1 5.26975 3.96701   1
   7 -11  -1 3.42171 3.12780   1
  -7  11   1 -0.1899  3.3408   1
   7  11  -1 4.99276 3.96360   1
   7  11  -1 2.13330 3.31764   5
   7  11  -1 7.12575 4.16693   3
  -6 -11   1 240.481  13.215   1
   6 -11  -1 264.166  13.502   1
   6  11  -1 238.459  13.112   1
   6  11  -1 228.238  13.736   5
  -6  11   1 248.805  13.568   1
   5 -11  -1 0.83597 1.50130   2
   5 -11  -1 -0.2262  2.5746   1
  -5 -11   1 2.52517 2.49493   1
  -5 -11   1 -0.3483  2.3244   1
   5  11  -1 1.88925 2.81833   1
   5  11  -1 0.49732 2.35337   5
  -5  11   1 0.70190 2.66339   1
   4 -11  -1 3.16872 1.74133   2
   4 -11  -1 1.84594 2.43353   1
  -4 -11   1 -0.3854  2.3059   1
   4  11  -1 -0.1925  2.0247   1
  -4  11   1 0.29898 2.57903   1
   4  11  -1 4.47386 2.62784   5
  -3 -11   1 154.157   8.665   1
   3 -11  -1 157.867   8.551   1
   3  11  -1 149.826   8.989   5
   3  11  -1 157.609   9.036   1
  -3  11   1 147.298   8.557   1
   2 -11  -1 125.779   7.401   1
  -2 -11   1 127.101   6.241   4
  -2 -11   1 135.328   7.530   1
  -2 -11   1 126.567   7.535   5
  -2  11   1 107.378   7.115   1
   2  11  -1 125.231   7.483   1
   2  11  -1 125.402   7.637   5
  -1 -11   1 3.49022 1.88342   5
   1 -11  -1 3.18760 2.16349   1
  -1 -11   1 2.93579 1.97564   1
   1 -11  -1 1.85029 1.37911   5
  -1 -11   1 1.08297 1.22060   4
  -1  11   1 -1.4273  2.0527   1
   1  11  -1 3.20788 1.99595   5
   1  11  -1 3.95744 2.41271   1
   0 -11   1 5.06639 2.25349   1
   0 -11  -1 6.69951 2.27553   1
   0 -11   1 6.04375 2.01067   5
   0 -11  -1 9.60165 1.92867   5
   0  11  -1 5.88520 1.48616   4
   0  11   1 7.26948 1.99862   5
   0  11   1 8.29633 2.60679   1
   0  11  -1 5.96443 2.43118   1
   1 -11   1 353.145  15.165   1
   1 -11   1 386.566  15.316   5
  -1 -11  -1 364.596  14.951   1
   1  11   1 395.046  15.096   5
  -1  11  -1 392.442  15.511   1
   1  11   1 397.930  15.558   1
   2 -11   1 11.4310  2.8620   1
  -2 -11  -1 10.6552  2.7857   1
   2  11   1 12.5849  2.8743   5
  -2  11  -1 7.94072 2.82058   1
   2  11   1 5.94914 2.82369   1
   3 -11   1 -1.4197  1.9254   1
  -3 -11  -1 2.86515 2.25129   1
   3  11   1 -0.3557  2.2788   1
  -3  11  -1 2.71152 2.43109   1
   3  11   1 1.55787 2.10715   5
  -4 -11  -1 18.0333  3.8142   1
   4 -11   1 27.3410  4.7412   1
  -4 -11  -1 21.9410  4.1397   1
  -4  11  -1 24.5896  4.3755   1
   4  11   1 26.8270  4.4608   5
   4  11   1 24.5768  4.7478   1
   5 -11   1 139.385   9.338   1
  -5 -11  -1 125.002   9.024   1
  -5  11  -1 138.332   9.507   1
   5  11   1 131.307   9.278   1
  -6 -11  -1 32.1957  5.6601   1
   6 -11   1 29.2347  5.4294   1
   6  11   1 37.0788  6.2896   1
  -6  11  -1 27.0091  5.4852   1
  -7 -11  -1 2.57271 3.27484   1
   7 -11   1 1.26718 3.49866   1
  -7  11  -1 5.14819 3.78043   1
   7  11   1 1.91255 3.54325   1
   8 -11   1 32.4861  6.6746   1
  -8 -11  -1 14.8770  4.7256   1
   8  11   1 42.3635  7.3358   1
  -8  11  -1 30.8448  6.1067   1
   8  11   1 25.1986  5.3274   3
  -9 -11  -1 37.2985  7.1344   1
   9 -11   1 51.5560  8.3419   1
   9  11   1 29.8137  7.0225   1
   9  11   1 41.0783  6.6196   3
  -9  11  -1 37.1406  7.4779   1
  10 -11   1 201.951  14.848   1
 -10 -11  -1 168.678  13.860   1
 -10  11  -1 208.881  14.788   1
  10  11   1 174.801  14.214   1
  11 -11   1 37.7181  7.9515   1
 -11 -11  -1 39.4421  8.4321   1
  11  11   1 34.4912  8.3444   1
 -11  11  -1 18.4520  6.6327   1
 -12 -11  -1 138.982  15.334   1
  12 -11   1 118.992  13.922   1
 -12  11  -1 102.971  13.720   1
  12  11   1 110.341  13.716   1
 -13 -11  -1 8.48352 6.51191   1
  13  11   1 10.2406  7.0152   1
 -13  11  -1 12.0374  6.7305   1
 -13 -12   1 15.9901  7.1809   1
 -13  12   1 5.08680 5.54987   1
 -12 -12   1 78.4571 11.4360   1
 -12  12   1 77.4577 11.7617   1
 -11 -12   1 1.35524 4.14782   1
  11 -12  -1 10.5617  5.4705   1
  11  12  -1 16.2708  5.8476   1
 -11  12   1 5.99828 4.84182   1
  10 -12  -1 30.7619  6.5122   1
 -10 -12   1 12.1284  5.7738   1
  10  12  -1 28.3291  6.6370   3
  10  12  -1 19.4959  6.5025   1
 -10  12   1 17.0560  6.0534   1
  -9 -12   1 23.8113  5.7100   1
   9 -12  -1 30.2178  6.4487   1
  -9  12   1 31.9858  6.9775   1
   9  12  -1 29.4335  6.3305   3
   9  12  -1 24.0498  6.3854   1
   9  12  -1 28.3167  6.5045   5
  -8 -12   1 16.6271  4.8394   1
   8 -12  -1 32.9037  6.0869   1
  -8  12   1 27.8949  6.1580   1
   8  12  -1 10.1433  4.5777   3
   8  12  -1 20.7050  5.7164   1
   8  12  -1 17.6398  5.1543   5
  -7 -12   1 4.14014 3.59117   1
   7 -12  -1 9.83525 4.35953   1
   7  12  -1 3.31134 3.88183   1
   7  12  -1 5.13640 4.14980   3
  -7  12   1 6.22813 4.11921   1
   7  12  -1 1.34998 3.34917   5
   6 -12  -1 9.33850 3.72970   1
  -6 -12   1 8.59663 3.67138   1
   6  12  -1 12.8339  4.1560   5
  -6  12   1 11.4746  4.0372   1
   6  12  -1 2.28343 3.59929   1
   5 -12  -1 111.910   8.509   1
  -5 -12   1 114.115   8.351   1
  -5 -12   1 120.255   8.488   1
   5 -12  -1 126.329   5.753   2
   5  12  -1 110.471   8.673   5
   5  12  -1 136.855   9.270   1
  -5  12   1 116.113   8.750   1
   4 -12  -1 2.26723 2.40241   1
  -4 -12   1 5.15610 2.74207   1
  -4  12   1 2.56151 2.40682   1
   4  12  -1 3.90705 2.96048   1
   4  12  -1 -0.3998  2.1383   5
  -3 -12   1 821.511  29.639   1
   3 -12  -1 816.840  29.247   1
   3  12  -1 833.014  29.708   1
  -3  12   1 815.981  29.718   1
   3  12  -1 848.255  31.025   5
  -2 -12   1 690.461  24.109   4
  -2 -12   1 692.640  25.964   5
   2 -12  -1 664.858  24.745   1
   2 -12  -1 713.188  24.459   5
  -2 -12   1 644.318  24.917   1
   2  12  -1 715.856  25.479   1
  -2  12   1 719.883  25.467   1
   2  12  -1 703.507  26.256   5
   1 -12  -1 82.6865  4.9787   5
  -1 -12   1 87.8050  4.0559   4
  -1 -12   1 81.9481  5.9311   1
   1 -12  -1 76.4933  5.7141   1
  -1 -12   1 88.3020  5.9734   5
  -1  12   1 77.3709  6.1924   1
   1  12  -1 77.7128  6.2717   1
   1  12  -1 75.9174  5.7780   5
   0 -12   1 102.392   6.857   1
   0 -12  -1 103.248   5.816   5
   0 -12   1 107.943   6.512   5
   0 -12  -1 103.861   6.802   1
   0  12   1 118.755   6.208   5
   0  12  -1 98.0648  6.8317   1
   0  12   1 112.988   7.173   1
   0  12  -1 108.782   4.917   4
   1 -12   1 76.8644  5.4724   5
  -1 -12  -1 64.6398  5.4375   1
   1 -12   1 80.5304  5.9215   1
  -1 -12  -1 69.0072  4.9608   5
   1  12   1 91.6357  5.6208   5
  -1  12  -1 73.0298  5.8387   1
   1  12   1 75.5710  5.9768   1
   2 -12   1 14.2740  3.3662   1
  -2 -12  -1 9.67443 2.82754   1
   2  12   1 9.38782 2.55164   5
  -2  12  -1 9.87624 2.96001   1
   2  12   1 2.80850 2.55062   1
  -3 -12  -1 29.1402  4.4394   1
   3 -12   1 21.4553  4.1154   1
   3  12   1 27.5055  4.5900   1
  -3  12  -1 24.4186  4.2688   1
   3  12   1 38.0167  4.7558   5
   4 -12   1 41.9070  5.7324   1
  -4 -12  -1 50.8617  6.1283   1
  -4 -12  -1 45.7673  5.8354   1
   4  12   1 44.6444  5.6761   5
   4  12   1 44.2366  6.0825   1
  -4  12  -1 40.9389  5.5658   1
  -5 -12  -1 41.4572  5.9109   1
   5 -12   1 43.2657  6.0628   1
   5  12   1 38.6712  5.7154   5
   5  12   1 39.5968  5.9271   1
  -5  12  -1 36.3617  5.7517   1
   6 -12   1 -1.7293  2.9722   1
  -6 -12  -1 -0.8536  2.9805   1
  -6  12  -1 -5.3044  2.7490   1
   6  12   1 5.24675 3.82152   1
  -7 -12  -1 29.1526  6.0799   1
   7 -12   1 30.7751  6.3306   1
  -7  12  -1 23.3460  5.8886   1
   7  12   1 46.7711  7.4333   1
  -8 -12  -1 39.0263  6.7936   1
   8 -12   1 37.4801  6.9730   1
   8  12   1 37.2135  7.2168   1
   8  12   1 36.3797  6.0187   3
  -8  12  -1 24.2300  5.7220   1
  -9 -12  -1 -1.0321  3.4595   1
   9 -12   1 0.24198 3.58404   1
   9  12   1 0.17662 3.69621   3
   9  12   1 -3.5362  2.8951   1
  -9  12  -1 2.96366 3.80027   1
 -10 -12  -1 12.2113  5.3937   1
  10 -12   1 13.4179  5.3359   1
 -10  12  -1 15.8346  6.1459   1
  10  12   1 15.5329  6.2982   1
 -11 -12  -1 12.4475  6.2149   1
  11 -12   1 10.4681  5.7735   1
  11  12   1 -1.1885  4.8229   1
 -11  12  -1 1.17034 4.73514   1
 -12 -12  -1 11.6721  6.1227   1
  12 -12   1 9.58351 5.68381   1
  12  12   1 7.05782 5.84466   1
 -12  12  -1 19.0861  7.3397   1
 -13 -12  -1 -1.0811  4.6690   1
  13  12   1 1.38765 6.12752   1
 -13  12  -1 -4.3156  5.0956   1
 -13 -13   1 -3.3229  4.9502   1
 -13  13   1 -0.0970  5.3047   1
 -12 -13   1 -0.2143  5.3293   1
 -12  13   1 -2.3951  4.3303   1
 -11 -13   1 32.5805  7.9092   1
  11 -13  -1 32.0748  7.5098   1
  11  13  -1 15.7307  6.2548   1
 -11  13   1 49.1398  9.3700   1
 -10 -13   1 -0.3427  3.7920   1
  10 -13  -1 11.2558  5.4011   1
  10  13  -1 4.88239 4.64531   3
 -10  13   1 6.18602 4.94907   1
  10  13  -1 -6.2895  3.7636   1
  -9 -13   1 35.8586  7.0205   1
   9 -13  -1 27.9274  6.4631   1
   9  13  -1 24.7803  6.1936   3
   9  13  -1 38.2544  7.4818   1
   9  13  -1 27.7092  6.5933   5
  -9  13   1 35.0419  7.3778   1
  -8 -13   1 149.849  11.766   1
   8 -13  -1 190.406  12.527   1
   8  13  -1 187.620  12.820   1
   8  13  -1 201.602  12.624   3
  -8  13   1 172.921  12.431   1
   8  13  -1 147.179  12.365   5
   7 -13  -1 9.47877 4.44491   1
  -7 -13   1 14.2039  4.4501   1
   7  13  -1 9.15747 4.16583   1
   7  13  -1 17.9562  4.9542   5
   7  13  -1 7.55372 4.36024   3
  -7  13   1 6.71025 4.32110   1
   6 -13  -1 1.88947 3.14988   1
  -6 -13   1 -3.6108  2.6627   1
  -6  13   1 0.00588 3.11041   1
   6  13  -1 2.89354 3.77094   1
   6  13  -1 5.47272 3.52473   5
  -5 -13   1 1.29096 2.70480   1
  -5 -13   1 0.59630 2.45565   1
   5 -13  -1 4.81706 3.16318   1
   5 -13  -1 2.85164 1.76967   2
   5  13  -1 -3.2361  2.3758   1
  -5  13   1 -0.3599  2.8735   1
   5  13  -1 1.97664 2.74566   5
  -4 -13   1 2.15489 2.66984   1
   4 -13  -1 1.26272 2.57705   1
   4  13  -1 2.58761 2.77008   1
   4  13  -1 -0.4144  2.1194   5
  -4  13   1 -0.8877  2.6968   1
   3 -13  -1 143.677   8.686   1
  -3 -13   1 145.916   8.883   1
  -3  13   1 146.264   9.056   1
   3  13  -1 125.565   8.710   1
   3  13  -1 139.927   8.925   5
  -2 -13   1 1.61539 2.36523   1
  -2 -13   1 -1.5069  1.4610   5
  -2 -13   1 1.42113 1.45486   4
   2 -13  -1 -0.3013  1.4123   5
   2 -13  -1 -0.6130  2.0679   1
  -2  13   1 -1.3581  2.2492   1
   2  13  -1 -1.3799  2.0869   1
   2  13  -1 3.76481 2.20131   5
   1 -13  -1 870.972  31.030   1
   1 -13  -1 912.488  30.738   5
  -1 -13   1 893.030  32.002   5
  -1 -13   1 884.835  31.170   1
  -1  13   1 907.273  31.511   1
   1  13  -1 903.988  32.285   5
   1  13  -1 886.540  31.443   1
   0 -13   1 378.786  15.898   5
   0 -13  -1 389.823  15.143   5
   0 -13  -1 379.619  15.702   1
   0 -13   1 388.430  16.105   1
   0  13   1 382.563  16.059   1
   0  13   1 386.565  15.253   5
   0  13  -1 409.424  16.357   1
   0  13  -1 396.405  13.767   4
  -1 -13  -1 198.418   9.689   5
  -1 -13  -1 203.803  10.328   1
   1 -13   1 216.748  10.573   1
   1 -13   1 204.228  10.118   5
  -1  13  -1 206.172  10.713   1
   1  13   1 203.147   9.853   5
  -1  13  -1 236.138   9.318   4
   1  13   1 194.829  10.722   1
  -2 -13  -1 18.4569  3.7019   1
   2 -13   1 20.4622  4.0406   1
   2  13   1 20.0199  3.8994   1
   2  13   1 25.0842  3.7498   5
  -2  13  -1 18.1208  3.7185   1
   3 -13   1 52.1701  5.9247   1
  -3 -13  -1 46.7773  5.5937   1
   3  13   1 53.5421  6.2153   1
  -3  13  -1 50.1740  6.0203   1
   3  13   1 54.7383  5.9016   5
   4 -13   1 1.76918 2.91634   1
  -4 -13  -1 -0.1829  2.2436   1
  -4 -13  -1 -2.4735  2.5103   1
   4  13   1 5.71423 3.16001   1
   4  13   1 1.21443 2.31466   5
  -4  13  -1 4.81532 2.99732   1
   5 -13   1 67.3649  7.6825   1
  -5 -13  -1 59.3654  7.0801   1
   5  13   1 79.3458  8.1638   5
  -5  13  -1 54.5730  7.2093   1
   5  13   1 62.9085  7.7368   1
   6 -13   1 2.03008 3.67854   1
  -6 -13  -1 8.14958 3.88494   1
   6  13   1 -0.1995  3.2934   1
  -6  13  -1 1.13325 3.22052   1
   6  13   1 6.51013 3.49494   5
  -7 -13  -1 44.4308  7.0993   1
   7 -13   1 55.0380  7.9744   1
   7  13   1 56.6309  7.8714   1
  -7  13  -1 57.8943  8.1821   1
   8 -13   1 0.50420 4.03762   1
  -8 -13  -1 0.39396 3.22526   1
   8  13   1 0.74805 3.65629   3
   8  13   1 0.20087 3.70057   1
  -8  13  -1 5.88545 3.91783   1
  -9 -13  -1 13.4171  5.4395   1
   9 -13   1 2.20597 4.26403   1
   9  13   1 20.0432  5.7912   1
   9  13   1 16.7115  5.2325   3
  -9  13  -1 9.46929 4.97136   1
 -10 -13  -1 2.64215 3.73292   1
  10 -13   1 6.53504 4.82631   1
 -10  13  -1 1.65261 4.39984   1
  10  13   1 -1.9340  4.2601   1
  11 -13   1 9.75406 5.70679   1
 -11 -13  -1 13.2813  6.4213   1
  11  13   1 15.8749  6.1315   1
 -11  13  -1 31.0746  7.8192   1
 -12 -13  -1 27.4139  7.8447   1
  12 -13   1 21.0493  7.2714   1
 -12  13  -1 23.8031  7.4899   1
  12  13   1 25.1301  8.0064   1
 -13 -13  -1 -6.2856  4.5335   1
 -13  13  -1 0.70049 5.49270   1
  13  13   1 2.16192 6.01524   1
 -13 -14   1 -1.5783  5.4042   1
 -13  14   1 4.87906 5.82082   1
 -12 -14   1 -5.8748  4.3895   1
 -12  14   1 1.54092 4.83276   1
 -11 -14   1 1.61527 4.32508   1
  11 -14  -1 6.43901 4.97988   1
 -11  14   1 5.31927 5.47583   1
  11  14  -1 1.15944 4.76547   1
  11  14  -1 -3.7146  4.6980   3
 -10 -14   1 -2.5485  3.2872   1
  10 -14  -1 2.74273 4.30742   1
  10  14  -1 3.73850 4.86951   1
 -10  14   1 3.36427 4.22665   1
  10  14  -1 5.24952 5.02224   3
   9 -14  -1 9.36444 4.85762   1
  -9 -14   1 5.87088 4.40291   1
   9  14  -1 2.39875 4.15832   3
   9  14  -1 -1.7789  4.1220   1
   9  14  -1 8.25256 4.39883   5
  -9  14   1 3.10996 4.41861   1
   8 -14  -1 31.5449  6.2864   1
  -8 -14   1 38.5366  7.0595   1
   8  14  -1 38.4788  6.9899   3
  -8  14   1 17.1377  5.3235   1
   8  14  -1 34.8990  7.1313   1
   8  14  -1 50.3259  7.9314   5
  -7 -14   1 8.89478 4.31231   1
   7 -14  -1 11.0120  4.3833   1
   7  14  -1 9.73444 4.28588   5
  -7  14   1 10.2749  4.2505   1
   7  14  -1 8.50165 4.47837   1
   6 -14  -1 16.3432  2.2413   2
  -6 -14   1 22.9322  5.0600   1
  -6 -14   1 9.18272 3.61647   1
   6 -14  -1 13.6048  4.5305   1
  -6  14   1 13.3385  4.8256   1
   6  14  -1 18.5380  4.7206   5
   6  14  -1 25.4008  5.4734   1
  -5 -14   1 4.09314 3.11932   1
   5 -14  -1 0.64825 1.92564   2
  -5 -14   1 3.60057 3.20527   1
   5 -14  -1 3.59373 3.09116   1
   5  14  -1 2.05608 3.38028   1
   5  14  -1 -0.9320  2.5042   5
  -5  14   1 -2.8291  2.9105   1
   4 -14  -1 133.282   8.902   1
  -4 -14   1 161.717   9.634   1
   4  14  -1 127.680   9.399   1
   4  14  -1 144.670   9.761   5
  -4  14   1 148.030   9.743   1
   3 -14  -1 41.3417  5.2685   1
  -3 -14   1 43.8045  5.6950   1
  -3 -14   1 40.1872  4.1476   4
  -3  14   1 28.2466  4.7859   1
   3  14  -1 47.7038  5.7791   5
   3  14  -1 46.2682  5.8200   1
  -2 -14   1 46.8493  3.4694   4
   2 -14  -1 44.7800  4.3232   5
   2 -14  -1 40.4028  5.1134   1
  -2 -14   1 44.7162  5.1314   5
  -2 -14   1 40.0897  5.1834   1
  -2  14   1 42.8247  5.5481   1
   2  14  -1 39.2986  5.2266   5
   2  14  -1 45.1871  5.6558   1
   1 -14  -1 335.424  12.897   5
  -1 -14   1 296.970  13.607   1
   1 -14  -1 305.945  13.747   1
  -1 -14   1 302.867  13.770   5
   1  14  -1 312.966  14.099   5
  -1  14   1 305.884  14.072   1
   1  14  -1 288.469  13.790   1
   0 -14   1 4.52541 2.74029   1
   0 -14  -1 4.34433 1.80445   5
   0 -14  -1 1.91500 2.12356   1
   0 -14   1 5.28525 2.17010   5
   0  14   1 3.90093 2.07820   5
   0  14  -1 5.08244 1.29937   4
   0  14   1 6.08718 2.82829   1
   0  14  -1 2.19189 2.56982   1
  -1 -14  -1 97.7745  7.2797   1
  -1 -14  -1 93.4147  6.1517   5
   1 -14   1 103.230   6.792   5
   1 -14   1 101.598   7.197   1
   1  14   1 94.5218  6.3533   5
   1  14   1 107.309   7.753   1
  -1  14  -1 115.625   5.951   4
  -1  14  -1 107.806   7.361   1
  -2 -14  -1 32.2271  4.6072   1
  -2 -14  -1 28.2287  2.4083   4
   2 -14   1 16.1465  3.7538   1
   2 -14   1 27.2825  3.9239   5
   2  14   1 21.7916  4.4322   1
   2  14   1 24.3760  3.8572   5
  -2  14  -1 27.8738  4.5873   1
  -3 -14  -1 37.8547  5.3755   1
   3 -14   1 27.8228  4.8627   1
   3  14   1 31.6833  5.0824   1
   3  14   1 36.6977  5.1153   5
  -3  14  -1 31.0349  5.0695   1
  -4 -14  -1 90.7589  8.4633   1
  -4 -14  -1 86.5891  8.3563   1
   4 -14   1 98.1875  7.8004   1
   4  14   1 90.6500  8.7945   1
   4  14   1 83.9725  7.2248   5
  -4  14  -1 87.7679  8.5878   1
   5 -14   1 26.2467  5.1490   1
  -5  14  -1 24.3800  5.0575   1
   5  14   1 29.1843  5.1895   5
   5  14   1 25.6219  5.3788   1
  -6 -14  -1 40.8666  6.6224   1
   6 -14   1 45.8871  7.1475   1
  -6  14  -1 50.7168  7.4701   1
   6  14   1 48.1125  7.1282   1
   6  14   1 34.4139  6.0645   5
   7 -14   1 37.4287  6.7287   1
  -7 -14  -1 35.1578  6.5368   1
  -7  14  -1 33.4570  6.4319   1
   7  14   1 37.5589  7.0169   1
   7  14   1 34.6292  6.4812   5
   8 -14   1 7.02108 4.09268   1
  -8 -14  -1 8.22132 4.15285   1
   8  14   1 5.35535 4.57095   1
   8  14   1 12.5306  4.6914   3
   8  14   1 -2.4271  2.9798   5
  -8  14  -1 2.84036 3.59799   1
  -9 -14  -1 37.4691  7.4715   1
   9 -14   1 38.0388  7.3731   1
   9  14   1 25.9603  6.5941   1
   9  14   1 24.3553  6.1395   3
   9  14   1 36.7033  7.4318   5
  -9  14  -1 19.3775  6.0546   1
  10 -14   1 24.8111  6.8788   1
 -10 -14  -1 21.6553  6.5960   1
  10  14   1 18.8074  5.9809   1
  10  14   1 20.9073  5.6978   3
 -10  14  -1 18.7372  6.3402   1
  11 -14   1 15.6769  6.3562   1
 -11 -14  -1 0.66820 4.93536   1
 -11  14  -1 0.24100 4.82508   1
  11  14   1 4.72878 5.42759   1
 -12 -14  -1 34.5081  8.7418   1
  12 -14   1 30.7076  8.1786   1
  12  14   1 54.4725 10.3906   1
 -12  14  -1 30.5931  8.2438   1
 -13 -14  -1 1.00953 5.89851   1
 -13  14  -1 12.5217  6.7768   1
  13  14   1 10.0013  6.4144   1
 -13 -15   1 6.42743 5.88947   1
 -13  15   1 2.17901 5.48983   1
 -12 -15   1 32.1568  8.3192   1
 -12  15   1 23.4969  7.7941   1
 -11 -15   1 5.73417 5.35647   1
  11 -15  -1 2.36354 4.61459   1
 -11  15   1 1.96564 4.73362   1
  11  15  -1 3.11803 5.32128   3
  11  15  -1 4.15655 4.91527   1
  10 -15  -1 78.2694 10.2880   1
 -10 -15   1 60.5290  9.3936   1
  10  15  -1 64.8327  9.9854   1
 -10  15   1 41.2893  8.5672   1
  10  15  -1 67.8083  9.5219   3
   9 -15  -1 11.5624  4.9942   1
  -9 -15   1 15.9852  5.4634   1
   9  15  -1 18.0494  6.1506   1
   9  15  -1 13.6007  5.5852   3
  -9  15   1 12.1253  5.0429   1
   9  15  -1 15.2096  6.0028   5
  -8 -15   1 -2.4119  3.0208   1
   8 -15  -1 -0.5944  3.5535   1
   8  15  -1 1.82549 3.58012   5
   8  15  -1 -1.4158  3.6167   3
  -8  15   1 5.01570 4.26331   1
   8  15  -1 -0.6642  3.9897   1
   7 -15  -1 82.8237  8.9930   1
  -7 -15   1 69.5070  8.6102   1
   7  15  -1 60.6449  8.2721   1
  -7  15   1 70.4467  8.7484   1
   7  15  -1 59.7160  8.2302   5
   6 -15  -1 12.0403  2.3182   2
   6 -15  -1 16.2310  4.5077   1
  -6 -15   1 8.38522 4.22221   1
  -6 -15   1 9.79537 4.12299   1
  -6  15   1 13.2520  4.5395   1
   6  15  -1 11.6087  4.2771   5
   6  15  -1 9.26691 4.06319   1
   5 -15  -1 12.4047  2.8711   2
  -5 -15   1 10.3972  4.0731   1
   5 -15  -1 11.1582  4.0674   1
   5  15  -1 13.6848  4.4243   1
  -5  15   1 17.5058  4.5376   1
   5  15  -1 10.5784  4.1113   5
  -4 -15   1 70.2245  7.5496   1
   4 -15  -1 57.5479  6.9494   1
   4  15  -1 49.9213  6.5685   5
  -4  15   1 55.5867  6.7903   1
   4  15  -1 55.0072  6.9858   1
  -3 -15   1 283.001  11.873   4
  -3 -15   1 293.430  14.102   1
   3 -15  -1 281.584  13.654   1
   3  15  -1 269.985  14.112   5
   3  15  -1 291.078  14.255   1
  -3  15   1 274.138  13.988   1
  -2 -15   1 47.3375  5.7411   1
  -2 -15   1 49.3577  5.6281   5
  -2 -15   1 49.3583  3.5538   4
   2 -15  -1 49.5239  5.7739   1
   2 -15  -1 58.6713  4.6090   5
   2  15  -1 63.2093  6.7762   1
  -2  15   1 49.5697  6.1286   1
   2  15  -1 50.1474  5.9311   5
   1 -15  -1 21.6960  3.1177   5
  -1 -15   1 14.9159  3.1652   5
  -1 -15   1 9.47829 3.15497   1
   1 -15  -1 19.1755  3.8509   1
   1  15  -1 11.2726  3.4009   1
  -1  15   1 15.5998  3.8847   1
   1  15  -1 8.80613 2.97628   5
   0 -15   1 170.251   9.819   1
   0 -15  -1 163.914   8.586   5
   0 -15  -1 177.889   9.630   1
   0 -15   1 181.546   9.575   5
   0  15   1 174.877  10.228   1
   0  15  -1 183.494  10.303   1
   0  15  -1 180.794   6.809   4
   0  15   1 171.520   8.849   5
  -1 -15  -1 426.684  17.588   1
   1 -15   1 449.485  17.742   5
   1 -15   1 433.679  17.930   1
  -1 -15  -1 424.239  17.044   5
   1  15   1 425.709  17.285   5
   1  15   1 402.281  17.793   1
  -1  15  -1 393.018  15.783   4
  -1  15  -1 418.245  17.802   1
   2 -15   1 96.0179  7.6582   1
   2 -15   1 90.5744  6.4858   5
  -2 -15  -1 101.921   7.291   1
   2  15   1 86.7769  8.1820   1
  -2  15  -1 88.8661  7.5145   1
   2  15   1 85.0240  6.6979   5
  -3 -15  -1 162.399   9.772   1
   3 -15   1 166.824  10.133   1
   3  15   1 144.800   9.830   1
  -3  15  -1 147.552   9.990   1
   3  15   1 162.154   9.722   5
  -4 -15  -1 263.589  13.627   1
   4 -15   1 250.824  13.511   1
  -4 -15  -1 254.971  13.400   1
   4  15   1 241.903  13.905   1
   4  15   1 246.827  13.499   5
  -4  15  -1 278.576  14.289   1
  -5 -15  -1 283.969  14.671   1
  -5 -15  -1 291.879  14.794   1
   5 -15   1 245.113  14.153   1
  -5  15  -1 255.143  14.444   1
   5  15   1 257.132  14.518   5
   5  15   1 233.683  14.248   1
  -6 -15  -1 292.983  15.934   1
   6 -15   1 297.274  15.993   1
   6  15   1 288.832  15.861   1
   6  15   1 253.510  15.489   5
  -6  15  -1 290.613  16.049   1
  -7 -15  -1 8.41362 3.87058   1
   7 -15   1 10.6447  4.6444   1
   7  15   1 6.63567 4.61632   1
  -7  15  -1 7.30975 4.00919   1
   7  15   1 7.03726 3.91506   5
   8 -15   1 2.28262 3.93787   1
  -8 -15  -1 2.58234 3.53528   1
  -8  15  -1 -1.5688  3.5004   1
   8  15   1 4.10692 3.95578   5
   8  15   1 2.82344 4.11320   1
   9 -15   1 58.9685  9.2101   1
  -9 -15  -1 40.3999  7.8257   1
   9  15   1 49.9800  7.8109   3
   9  15   1 54.4972  8.8851   1
  -9  15  -1 48.2890  8.5210   1
   9  15   1 40.5855  8.0162   5
  10 -15   1 8.56910 5.12051   1
 -10 -15  -1 1.81178 4.40408   1
  10  15   1 0.40934 4.58414   1
 -10  15  -1 12.6296  5.9299   1
  10  15   1 -1.2495  4.6801   3
  11 -15   1 15.9852  6.3691   1
 -11 -15  -1 11.3142  5.6257   1
  11  15   1 2.08679 5.18917   1
 -11  15  -1 15.2690  6.3243   1
  12 -15   1 4.37857 5.73638   1
 -12 -15  -1 3.22815 5.02039   1
 -12  15  -1 0.14079 5.40628   1
  12  15   1 -0.6271  5.5802   1
 -12 -16   1 47.8375  9.8569   1
 -12  16   1 55.3181 10.4983   1
 -11 -16   1 18.1620  6.7114   1
  11  16  -1 -1.3424  4.8774   1
 -11  16   1 4.65756 5.03153   1
  11  16  -1 -2.7987  5.2123   3
 -10 -16   1 49.3580  8.9485   1
  10 -16  -1 32.7405  7.4578   1
  10  16  -1 51.5561  8.7805   1
  10  16  -1 54.3818  8.9632   3
 -10  16   1 49.5011  9.0161   1
  -9 -16   1 105.425  11.567   1
   9 -16  -1 92.7774 10.8941   1
  -9  16   1 103.170  11.976   1
   9  16  -1 90.1377 10.7574   3
   9  16  -1 108.664  12.062   1
   8 -16  -1 0.97018 3.72828   1
  -8 -16   1 -1.8322  2.9934   1
   8  16  -1 5.47521 4.76985   1
   8  16  -1 3.04275 4.34551   3
  -8  16   1 -0.9142  3.4876   1
   8  16  -1 4.03121 4.00724   5
  -7 -16   1 1.52326 3.38304   1
   7 -16  -1 0.57433 3.47085   1
  -7  16   1 11.8036  4.5795   1
   7  16  -1 1.98771 3.89792   1
   7  16  -1 3.77719 3.66289   5
   6 -16  -1 1.85851 1.84002   2
   6 -16  -1 6.47289 3.94499   1
  -6 -16   1 2.08372 3.80403   1
  -6 -16   1 1.27384 3.45846   1
   6  16  -1 1.84213 3.44221   1
  -6  16   1 8.49964 4.45695   1
   6  16  -1 5.14322 3.70486   5
   5 -16  -1 -0.2109  2.9665   1
  -5 -16   1 3.89150 3.45454   1
   5 -16  -1 6.28717 2.72310   2
  -5  16   1 9.24353 4.13395   1
   5  16  -1 8.93515 4.15418   1
   5  16  -1 8.42871 3.81510   5
  -4 -16   1 14.8516  4.2134   1
   4 -16  -1 9.98995 3.74799   1
   4  16  -1 11.5390  4.3562   1
   4  16  -1 10.9493  3.8295   5
  -4  16   1 17.5068  4.4178   1
  -3 -16   1 33.3679  5.4800   1
  -3 -16   1 33.3933  3.6683   4
   3 -16  -1 39.5961  4.4307   5
   3 -16  -1 34.8683  5.2050   1
   3  16  -1 31.2858  5.1400   5
  -3  16   1 35.1147  5.4593   1
   3  16  -1 31.9855  5.3974   1
  -2 -16   1 30.5771  2.6681   4
  -2 -16   1 39.0424  5.1088   5
   2 -16  -1 37.7207  4.1747   5
   2 -16  -1 27.3466  4.6546   1
  -2 -16   1 21.7972  4.4129   1
  -2  16   1 37.0880  5.6308   1
   2  16  -1 29.7333  4.7448   5
   2  16  -1 40.2272  5.7099   1
  -1 -16   1 7.14395 3.00546   1
  -1 -16   1 9.56039 2.72069   5
   1 -16  -1 12.9731  3.3839   1
   1 -16  -1 7.80555 2.29499   5
   1  16  -1 14.9361  3.6330   5
  -1  16   1 13.4885  3.8182   1
   1  16  -1 12.1829  3.7500   1
  -1  16   1 11.1518  1.6682   4
   0 -16  -1 0.32509 1.43514   5
   0 -16   1 4.28408 2.91788   1
   0 -16   1 1.75194 1.84478   5
   0 -16  -1 2.81833 2.47539   1
   0  16  -1 4.00901 2.78603   1
   0  16   1 2.87487 2.11482   5
   0  16   1 1.24112 2.67216   1
  -1 -16  -1 33.6656  4.8800   1
   1 -16   1 43.7151  5.7816   1
   1 -16   1 35.4540  4.6222   5
  -1 -16  -1 29.4698  4.0380   5
  -1  16  -1 38.7745  3.5989   4
   1  16   1 28.2574  4.9069   1
   1  16   1 32.6019  4.3410   5
  -1  16  -1 32.9644  5.0945   1
   2 -16   1 143.116   8.612   5
   2 -16   1 159.407   9.940   1
  -2 -16  -1 147.200   9.183   1
   2  16   1 120.912   9.065   1
   2  16   1 140.567   8.861   5
  -2  16  -1 151.563   9.882   1
   3 -16   1 3.99036 3.34997   1
  -3 -16  -1 -0.0853  2.7074   1
   3  16   1 -0.1102  2.2199   5
   3  16   1 7.65216 3.77118   1
  -3  16  -1 2.74057 3.07088   1
   4 -16   1 65.8455  7.5744   1
  -4 -16  -1 67.7750  7.7942   1
   4  16   1 61.6473  7.0778   5
   4  16   1 76.3409  8.4284   1
  -4  16  -1 73.4397  8.0683   1
  -5 -16  -1 265.866  14.622   1
   5 -16   1 272.437  14.834   1
  -5 -16  -1 280.844  14.820   1
   5  16   1 281.889  15.203   1
  -5  16  -1 232.869  14.566   1
   5  16   1 289.573  15.221   5
   6 -16   1 241.693  14.509   1
  -6 -16  -1 252.031  14.494   1
   6  16   1 245.863  14.938   1
  -6  16  -1 241.455  14.675   1
   6  16   1 213.135  13.963   5
   7 -16   1 21.3783  5.4392   1
  -7 -16  -1 23.4651  5.6763   1
   7  16   1 7.07495 4.36463   1
  -7  16  -1 22.2458  5.7654   1
   7  16   1 13.2162  4.7391   5
  -8 -16  -1 4.50747 4.11868   1
   8 -16   1 1.89029 3.92437   1
   8  16   1 -0.8906  4.0067   1
  -8  16  -1 -0.0576  4.0495   1
   8  16   1 1.22399 3.63425   5
   9 -16   1 69.5632  9.8425   1
  -9 -16  -1 79.6386 10.4189   1
   9  16   1 92.2752 11.4365   1
   9  16   1 88.9970 10.0891   3
  -9  16  -1 81.9618 11.2081   1
  10 -16   1 4.58041 4.92999   1
 -10 -16  -1 4.42292 4.58440   1
  10  16   1 3.38317 5.05192   1
 -10  16  -1 7.51598 5.62392   1
  10  16   1 2.54267 4.95388   3
  11 -16   1 27.3480  7.6202   1
 -11 -16  -1 11.9114  5.7562   1
  11  16   1 7.06715 6.23480   1
 -11  16  -1 23.8741  7.5565   1
 -12 -16  -1 4.86060 5.16698   1
  12 -16   1 11.0890  6.3411   1
 -12  16  -1 -1.2716  4.8333   1
  12  16   1 9.89246 6.40839   1
 -12 -17   1 6.50243 5.47553   1
 -12  17   1 -0.8494  4.9662   1
 -11 -17   1 6.88792 5.71872   1
 -11  17   1 0.69919 4.87685   1
  11  17  -1 -0.9976  5.4559   3
  11  17  -1 10.4195  5.8898   1
  10 -17  -1 3.33398 4.51117   1
 -10 -17   1 3.31148 4.89413   1
 -10  17   1 -0.0515  4.1940   1
  10  17  -1 4.66042 4.98195   1
  10  17  -1 2.93494 5.26833   3
  -9 -17   1 19.5806  5.9659   1
   9 -17  -1 12.9696  5.2483   1
   9  17  -1 32.6866  7.4126   3
  -9  17   1 33.5180  7.4308   1
   9  17  -1 30.6232  7.3378   1
  -8 -17   1 6.14040 4.34650   1
   8 -17  -1 12.7797  5.1216   1
   8  17  -1 8.98497 4.75562   5
   8  17  -1 11.7560  5.3790   3
   8  17  -1 13.6136  5.4353   1
  -8  17   1 12.4216  5.1177   1
   7 -17  -1 6.42201 3.94276   1
  -7 -17   1 -0.4127  3.3155   1
   7  17  -1 -0.9024  3.3435   5
  -7  17   1 -1.4738  2.9779   1
   7  17  -1 -0.3088  3.6087   1
  -6 -17   1 228.562  13.967   1
   6 -17  -1 257.712  14.453   1
  -6 -17   1 214.619  13.711   1
   6  17  -1 256.767  14.851   1
   6  17  -1 232.029  14.635   5
  -6  17   1 231.609  14.319   1
   5 -17  -1 6.51867 3.56635   1
  -5 -17   1 2.02761 3.24959   1
   5  17  -1 0.50505 3.42376   1
  -5  17   1 8.18891 4.29292   1
   5  17  -1 2.22587 3.19153   5
  -4 -17   1 18.0352  3.5773   4
   4 -17  -1 14.2582  4.1036   1
  -4 -17   1 8.02140 3.54225   1
  -4  17   1 17.8919  4.6013   1
   4  17  -1 12.2390  4.5426   1
   4  17  -1 14.6131  4.2598   5
  -3 -17   1 25.6076  3.1859   4
   3 -17  -1 16.8413  3.2872   5
  -3 -17   1 27.4652  4.9790   1
   3 -17  -1 23.1411  4.8894   1
   3  17  -1 22.6211  4.6045   5
  -3  17   1 21.8342  4.8644   1
   3  17  -1 29.4283  5.3565   1
  -2 -17   1 43.0156  5.5147   5
   2 -17  -1 48.5189  6.0563   1
   2 -17  -1 41.4093  4.5714   5
  -2 -17   1 35.4412  5.6670   1
  -2  17   1 46.3466  6.3400   1
   2  17  -1 47.0358  6.3274   1
   2  17  -1 39.4305  5.7138   5
   1 -17  -1 36.2766  4.2697   5
   1 -17  -1 32.3983  5.0109   1
  -1 -17   1 29.6673  5.0029   1
  -1 -17   1 39.1224  5.0665   5
   1  17  -1 32.8329  5.2994   1
   1  17  -1 33.2127  5.0865   5
  -1  17   1 38.1716  5.8025   1
   0 -17  -1 25.2147  4.5560   1
   0 -17  -1 27.5068  3.8358   5
   0 -17   1 31.3543  4.5035   5
   0 -17   1 27.9691  4.9288   1
   0  17   1 25.4193  5.0170   1
   0  17  -1 24.7661  4.7325   1
   1 -17   1 177.150  10.603   1
   1 -17   1 181.857  10.026   5
  -1 -17  -1 166.621   9.320   5
  -1 -17  -1 176.538  10.603   1
   1  17   1 173.990   9.789   5
   1  17   1 201.437  11.410   1
  -1  17  -1 175.160   7.982   4
  -1  17  -1 185.816  10.981   1
   2 -17   1 -2.4197  1.5626   5
  -2 -17  -1 3.77311 2.97717   1
   2 -17   1 -2.5126  2.5568   1
  -2  17  -1 3.60967 3.10362   1
   2  17   1 -2.2847  2.8970   1
   2  17   1 6.34711 2.82288   5
   3 -17   1 116.025   8.927   1
  -3 -17  -1 107.188   8.534   1
   3  17   1 116.387   8.422   5
   3  17   1 126.627   9.195   1
  -3  17  -1 108.421   9.873   1
  -4 -17  -1 55.7587  7.2390   1
   4 -17   1 39.7365  6.5423   1
   4  17   1 40.3471  6.7280   1
   4  17   1 45.4143  6.2934   5
  -4  17  -1 32.5008  6.0225   1
  -5 -17  -1 15.8415  4.4449   1
   5 -17   1 7.92235 4.03628   1
  -5 -17  -1 10.8390  4.3871   1
  -5  17  -1 17.4144  5.1285   1
   5  17   1 16.6719  4.5654   5
   5  17   1 23.9434  5.6143   1
  -6 -17  -1 7.24772 4.11512   1
   6 -17   1 11.9119  4.4039   1
  -6  17  -1 13.8243  4.9257   1
   6  17   1 10.9161  4.4611   5
   6  17   1 10.6233  4.5812   1
  -7 -17  -1 4.22822 3.69123   1
   7 -17   1 4.24572 4.12648   1
   7  17   1 13.5957  5.2032   1
  -7  17  -1 2.93087 3.91216   1
   7  17   1 5.18224 3.96767   5
  -8 -17  -1 0.35462 3.86409   1
   8 -17   1 4.94852 4.33419   1
  -8  17  -1 6.55874 4.74241   1
   8  17   1 2.81798 4.43803   1
   8  17   1 -0.5186  4.0711   5
   9 -17   1 37.1479  7.4650   1
  -9 -17  -1 28.4297  6.7388   1
  -9  17  -1 28.5018  7.2446   1
   9  17   1 26.1271  6.7595   3
   9  17   1 22.7796  6.7374   1
  10 -17   1 112.594  12.683   1
 -10 -17  -1 96.3677 12.4823   1
  10  17   1 98.6228 12.7528   1
  10  17   1 103.787  11.574   3
 -10  17  -1 87.5898 12.1120   1
 -11 -17  -1 14.4713  6.6668   1
  11 -17   1 3.69570 5.34937   1
  11  17   1 1.66744 5.51425   1
 -11  17  -1 1.27584 5.70507   1
  12 -17   1 33.9006  8.3779   1
 -12 -17  -1 34.4543  9.0741   1
 -12  17  -1 29.5975  8.5507   1
  12  17   1 9.95357 7.09232   1
 -12 -18   1 31.7717  8.7604   1
 -12  18   1 30.5914  8.6274   1
 -11 -18   1 28.0386  7.4369   1
  11  18  -1 10.0367  6.8395   3
 -11  18   1 21.8169  7.6382   1
  11  18  -1 25.3014  7.7345   1
 -10 -18   1 0.12041 4.31610   1
  10 -18  -1 1.45696 4.57029   1
  10  18  -1 8.73764 5.71525   1
  10  18  -1 8.61098 5.69519   3
 -10  18   1 2.49897 4.87434   1
   9 -18  -1 47.0332  8.3050   1
  -9 -18   1 35.7245  7.3836   1
   9  18  -1 32.2609  7.5174   1
  -9  18   1 24.2688  6.6976   1
   9  18  -1 53.5072  9.0354   3
   8 -18  -1 198.082  13.972   1
  -8 -18   1 186.037  13.763   1
   8  18  -1 206.932  15.088   5
   8  18  -1 200.126  14.426   3
   8  18  -1 204.906  14.560   1
  -8  18   1 194.384  14.202   1
  -7 -18   1 2.01974 3.18871   1
   7 -18  -1 1.05784 3.59181   1
  -7  18   1 3.17890 3.87134   1
   7  18  -1 6.66739 4.25449   5
   7  18  -1 5.07007 4.20253   1
   6 -18  -1 31.4365  6.1814   1
  -6 -18   1 22.9425  5.4744   1
  -6 -18   1 26.4686  5.7337   1
   6  18  -1 22.9353  5.5588   5
  -6  18   1 19.5053  5.6522   1
   6  18  -1 14.7020  5.4176   1
  -5 -18   1 30.2782  6.0806   1
   5 -18  -1 50.9983  7.0942   1
   5  18  -1 49.8801  7.4111   5
  -5  18   1 51.1700  7.4373   1
   5  18  -1 63.6418  7.9426   1
  -4 -18   1 29.4161  5.5894   1
  -4 -18   1 29.4727  4.0222   4
   4 -18  -1 20.0581  5.0785   1
   4  18  -1 23.3533  5.5162   1
  -4  18   1 34.4052  6.2564   1
   4  18  -1 31.1992  5.6844   5
  -3 -18   1 83.5056  5.0957   4
   3 -18  -1 79.0472  8.1020   1
  -3 -18   1 95.6878  8.9852   1
   3 -18  -1 86.5903  6.2631   5
  -3  18   1 78.4601  8.4801   1
   3  18  -1 78.1667  8.3132   5
   3  18  -1 82.0223  8.5938   1
   2 -18  -1 1129.02   38.55   5
  -2 -18   1 1062.07   39.40   1
  -2 -18   1 1109.26   40.34   5
   2 -18  -1 1108.36   39.29   1
  -2  18   1 1071.64   39.70   1
   2  18  -1 1118.30   39.94   1
   2  18  -1 1092.95   40.59   5
   1 -18  -1 30.5488  5.0588   1
  -1 -18   1 35.8201  4.9983   5
   1 -18  -1 36.8942  4.4140   5
  -1 -18   1 34.0370  5.5905   1
   1  18  -1 30.3575  4.9468   5
  -1  18   1 21.1895  4.6144   1
   1  18  -1 34.7517  5.7839   1
   0 -18   1 15.5626  3.3838   5
   0 -18  -1 11.7836  3.6673   1
   0 -18   1 14.4316  4.0540   1
   0 -18  -1 13.2788  3.0307   5
   0  18   1 25.9237  5.0546   1
   0  18  -1 13.4458  4.1909   1
   1 -18   1 21.4310  3.7089   5
   1 -18   1 13.6211  4.2658   1
  -1 -18  -1 25.8481  4.8576   1
  -1 -18  -1 26.8390  4.1564   5
  -1  18  -1 21.0673  4.8666   1
  -1  18  -1 22.7285  2.7207   4
   1  18   1 17.4493  4.8733   1
   1  18   1 19.5732  3.8663   5
   2 -18   1 8.27693 3.54483   1
   2 -18   1 10.6652  3.1603   5
  -2 -18  -1 1.76847 2.97024   1
   2  18   1 7.41917 2.94827   5
   2  18   1 8.40098 3.77685   1
  -2  18  -1 10.2639  4.2358   1
  -3 -18  -1 118.112   9.115   1
   3 -18   1 126.038   8.479   5
  -3 -18  -1 118.120   5.479   4
  -3 -18  -1 120.522   5.500   4
   3 -18   1 132.822   9.531   1
   3  18   1 107.613   8.454   5
   3  18   1 87.7657  9.2624   1
  -3  18  -1 123.356   9.731   1
   4 -18   1 8.58247 4.01090   1
  -4 -18  -1 5.27440 3.72386   1
   4  18   1 7.07233 3.43934   5
  -4  18  -1 8.06495 4.03449   1
   4  18   1 15.6692  4.8704   1
  -5 -18  -1 97.2955 10.1758   1
  -5 -18  -1 123.036  11.141   1
   5 -18   1 93.2652  9.9711   1
   5  18   1 85.4084  9.3047   5
  -5  18  -1 80.0089  9.2592   1
   5  18   1 92.9657  9.9512   1
  -6 -18  -1 25.2680  5.5693   1
   6 -18   1 33.2422  6.6245   1
  -6  18  -1 27.4066  6.1105   1
   6  18   1 30.1160  6.4438   1
   6  18   1 23.9850  5.6419   5
   7 -18   1 18.8499  5.4202   1
  -7 -18  -1 30.5327  6.6325   1
   7  18   1 28.2042  6.2636   5
   7  18   1 21.8262  6.1021   1
  -7  18  -1 24.1914  5.8598   1
   8 -18   1 -1.2291  3.5147   1
  -8 -18  -1 4.59383 4.22481   1
   8  18   1 18.8987  6.0823   1
  -8  18  -1 24.1368  6.5039   1
   8  18   1 15.1512  5.5517   5
  -9 -18  -1 14.3184  5.3316   1
   9 -18   1 17.6218  6.0927   1
   9  18   1 33.5393  7.5909   1
  -9  18  -1 18.3312  6.3490   1
   9  18   1 19.4743  6.1375   3
 -10 -18  -1 200.168  15.421   1
  10 -18   1 201.734  15.552   1
 -10  18  -1 188.447  15.557   1
  10  18   1 184.145  15.546   1
  10  18   1 202.245  14.920   3
  11 -18   1 30.2190  7.8850   1
 -11 -18  -1 33.2794  8.6525   1
 -11  18  -1 54.5201 10.6142   1
  11  18   1 31.2019  8.1640   1
 -12 -18  -1 1.08390 5.84864   1
  12  18   1 0.45006 5.89243   1
 -12  18  -1 -6.5564  4.4488   1
 -12 -19   1 6.34581 5.86252   1
 -12  19   1 -0.0177  5.5089   1
 -11 -19   1 24.1845  7.4326   1
 -11  19   1 18.6236  7.1396   1
  11  19  -1 24.5153  8.0047   3
 -10 -19   1 -0.8786  4.2991   1
  10 -19  -1 7.27400 4.90404   1
 -10  19   1 -0.5321  4.5961   1
  10  19  -1 -1.5712  4.8126   1
  10  19  -1 13.4569  6.3448   3
   9 -19  -1 0.23209 4.33771   1
  -9 -19   1 2.70025 4.62977   1
   9  19  -1 0.91204 4.41366   1
  -9  19   1 -2.3760  3.7806   1
   9  19  -1 9.86753 5.60229   3
  -8 -19   1 8.85701 4.73464   1
   8 -19  -1 0.00939 4.13387   1
   8  19  -1 -0.6277  3.6301   5
   8  19  -1 3.74609 4.39292   1
  -8  19   1 2.06399 4.56702   1
   7 -19  -1 51.3684  7.9818   1
  -7 -19   1 57.2582  8.5044   1
   7  19  -1 61.1854  8.7677   5
   7  19  -1 34.2642  7.4986   1
  -7  19   1 68.0738  9.2906   1
  -6 -19   1 4.49842 3.37662   1
  -6 -19   1 -0.9356  3.0788   1
   6 -19  -1 4.68293 4.02386   1
   6  19  -1 0.40527 2.91119   5
   6  19  -1 4.35077 4.21931   1
  -6  19   1 1.65650 3.35190   1
  -5 -19   1 83.9011  9.3470   1
   5 -19  -1 57.4002  7.7275   1
  -5  19   1 53.1964  7.7368   1
   5  19  -1 62.7671  8.3020   5
   5  19  -1 78.3501  9.1684   1
  -4 -19   1 16.6262  4.9740   1
   4 -19  -1 7.52138 3.92643   1
   4 -19  -1 12.1527  3.2464   5
  -4  19   1 7.90950 3.92490   1
   4  19  -1 9.10881 4.42829   1
   4  19  -1 11.8146  4.2383   5
  -3 -19   1 5.52045 3.55913   1
   3 -19  -1 2.57869 3.21513   1
   3 -19  -1 1.88511 2.09082   5
  -3 -19   1 -1.0242  1.4572   4
  -3  19   1 0.68068 3.34852   1
   3  19  -1 -2.1898  2.3769   5
   3  19  -1 3.21877 3.64556   1
   2 -19  -1 2.75332 3.23270   1
  -2 -19   1 1.93949 2.37741   5
   2 -19  -1 -1.3515  1.6283   5
  -2 -19   1 1.48874 3.17742   1
   2  19  -1 -0.0615  3.2948   1
   2  19  -1 0.49925 2.59441   5
  -2  19   1 3.34491 3.57229   1
   1 -19  -1 359.606  15.190   5
  -1 -19   1 333.036  16.391   1
   1 -19  -1 341.202  16.316   1
  -1 -19   1 337.288  16.249   5
   1  19  -1 364.310  17.291   1
   1  19  -1 337.066  16.432   5
  -1  19   1 347.678  17.100   1
   0 -19  -1 2.32761 2.12528   5
   0 -19   1 -1.0796  2.4968   1
   0 -19  -1 -1.2939  2.6787   1
   0 -19   1 0.37759 1.98728   5
   0  19  -1 2.50230 3.48204   1
   0  19   1 -0.6555  2.9024   1
  -1 -19  -1 293.129  13.521   5
   1 -19   1 273.554  13.756   5
   1 -19   1 283.203  14.757   1
  -1 -19  -1 258.041  13.991   1
  -1  19  -1 280.300  14.740   1
   1  19   1 293.430  15.050   1
   1  19   1 278.315  13.714   5
  -1  19  -1 274.227  10.908   4
  -2 -19  -1 7.51260 3.55138   1
   2 -19   1 11.9674  4.1483   1
   2 -19   1 5.19946 2.50609   5
   2  19   1 3.24523 2.73603   5
   2  19   1 6.08952 3.78288   1
  -2  19  -1 11.8500  4.0739   1
  -2  19  -1 4.63020 2.40993   4
   3 -19   1 4.80644 2.57708   5
   3 -19   1 0.64152 2.85224   1
  -3 -19  -1 4.74000 3.56446   1
  -3  19  -1 0.71434 3.52418   1
   3  19   1 4.75761 3.86092   1
   3  19   1 4.20887 3.24237   5
  -4 -19  -1 355.682  17.392   1
   4 -19   1 342.826  17.429   1
  -4  19  -1 346.280  17.593   1
   4  19   1 321.500  17.127   5
   4  19   1 337.740  17.607   1
   5 -19   1 20.2003  5.7634   1
  -5 -19  -1 24.1451  5.4482   1
  -5 -19  -1 21.1808  5.3098   1
   5  19   1 22.1851  6.0284   1
   5  19   1 22.4972  5.1530   5
  -5  19  -1 13.7440  5.2372   1
  -6 -19  -1 31.2814  6.6790   1
   6 -19   1 36.5641  6.9844   1
   6  19   1 37.6963  6.7390   5
   6  19   1 41.0614  7.2248   1
  -6  19  -1 35.5402  7.0988   1
   7 -19   1 54.8365  8.5238   1
  -7 -19  -1 42.6633  7.4726   1
   7  19   1 40.5191  7.3716   5
   7  19   1 42.2010  7.8837   1
  -7  19  -1 55.3791  8.8151   1
   8 -19   1 74.0767 10.0902   1
  -8 -19  -1 89.1939 10.8765   1
   8  19   1 73.9681 10.1606   5
   8  19   1 72.3236  9.9981   1
  -8  19  -1 84.6142 11.0588   1
   9 -19   1 26.4429  7.0517   1
  -9 -19  -1 55.4459  9.3093   1
  -9  19  -1 30.6935  7.8947   1
   9  19   1 41.1786  7.9722   3
   9  19   1 28.4720  7.2344   1
  10 -19   1 3.50888 5.21883   1
 -10 -19  -1 -0.5363  4.2466   1
 -10  19  -1 10.5140  5.7979   1
  10  19   1 -0.7200  4.8583   1
  10  19   1 3.11155 5.47735   3
 -11 -19  -1 17.9590  7.2761   1
  11 -19   1 19.2445  7.0734   1
 -11  19  -1 14.7436  7.2014   1
  11  19   1 5.78606 5.88669   1
 -12 -19  -1 28.2381  8.5919   1
  12  19   1 30.0056  9.0544   1
 -12  19  -1 26.0616  8.1088   1
 -12 -20   1 21.5860  7.9882   1
 -12  20   1 18.2231  8.0131   1
 -11 -20   1 4.02454 5.01138   1
 -11  20   1 -4.2933  4.0372   1
  11  20  -1 -3.1725  5.2912   3
 -10 -20   1 32.1549  7.9260   1
  10 -20  -1 32.3332  7.4626   1
  10  20  -1 33.0817  8.4655   3
  10  20  -1 23.9197  7.5036   1
 -10  20   1 40.5764  8.7186   1
   9 -20  -1 116.666  12.928   1
  -9 -20   1 119.056  13.134   1
  -9  20   1 168.912  15.962   1
   9  20  -1 122.336  13.379   1
   9  20  -1 136.942  13.998   3
   8 -20  -1 140.662  13.633   1
  -8 -20   1 157.312  12.898   1
  -8  20   1 169.115  13.410   1
   8  20  -1 178.520  13.739   1
   7 -20  -1 5.53327 4.43607   1
  -7 -20   1 -0.2062  1.9203   1
  -7  20   1 2.00953 3.64392   1
   7  20  -1 -0.1782  3.2682   5
   7  20  -1 -0.6183  4.1480   1
  -6 -20   1 16.3995  5.2269   1
   6 -20  -1 27.3350  6.2837   1
  -6 -20   1 28.9869  6.0869   1
   6  20  -1 27.7271  6.2827   1
   6  20  -1 17.1877  5.2781   5
  -6  20   1 32.7461  6.7356   1
  -5 -20   1 128.849  10.240   1
   5 -20  -1 97.3066 10.0466   1
   5  20  -1 94.3276 10.1784   5
   5  20  -1 95.0120 10.3320   1
  -5  20   1 84.0115  9.7591   1
   4 -20  -1 24.7101  4.1843   5
  -4 -20   1 31.6309  5.8863   1
   4 -20  -1 20.5789  5.1485   1
   4  20  -1 20.6891  5.3797   1
  -4  20   1 22.4110  5.5161   1
   4  20  -1 21.0308  5.1023   5
  -3 -20   1 26.2992  5.7294   1
   3 -20  -1 43.5680  5.1558   5
   3 -20  -1 34.5198  6.1006   1
   3  20  -1 31.6680  6.3005   1
   3  20  -1 27.5659  5.3867   5
  -3  20   1 37.3322  6.6967   1
  -2 -20   1 38.1122  6.0642   1
   2 -20  -1 28.8545  4.2850   5
  -2 -20   1 26.0491  4.6923   5
   2 -20  -1 36.7409  5.8451   1
   2  20  -1 28.8383  5.4427   5
  -2  20   1 18.7935  5.2088   1
   2  20  -1 35.3596  6.4052   1
   1 -20  -1 119.756   8.835   1
   1 -20  -1 93.2983  6.9285   5
  -1 -20   1 119.445   9.381   1
  -1 -20   1 106.977   8.035   5
  -1  20   1 98.9359  9.7848   1
   1  20  -1 106.495   8.429   5
   1  20  -1 108.870   8.971   1
   0 -20   1 101.497   7.617   5
   0 -20  -1 96.6177  6.9833   5
   0 -20  -1 108.039   8.811   1
   0 -20   1 92.5104  9.1813   1
   0  20  -1 92.5864  9.2312   1
   0  20   1 108.289  10.133   1
   1 -20   1 148.476   9.344   5
  -1 -20  -1 148.242   9.992   1
   1 -20   1 152.452  10.673   1
  -1 -20  -1 131.823   8.597   5
   1  20   1 142.639   9.260   5
   1  20   1 145.442  10.494   1
  -1  20  -1 141.014   6.297   4
  -1  20  -1 128.765  10.224   1
  -2 -20  -1 17.7157  4.6215   1
   2 -20   1 21.5640  5.1117   1
   2 -20   1 18.2880  3.9284   5
   2  20   1 21.7259  4.5612   5
  -2  20  -1 21.5798  3.5112   4
   2  20   1 13.7918  4.6287   1
  -2  20  -1 11.8391  4.3204   1
  -3 -20  -1 245.073  14.095   1
   3 -20   1 261.757  13.604   5
   3 -20   1 262.128  14.768   1
  -3  20  -1 234.704  14.244   1
   3  20   1 260.469  15.062   1
   3  20   1 242.855  13.721   5
   4 -20   1 107.298   8.335   5
   4 -20   1 81.6448  9.3058   1
  -4 -20  -1 88.0424  9.5577   1
   4  20   1 97.7337 10.1856   1
   4  20   1 84.6145  8.9922   5
  -4  20  -1 97.6800 10.1815   1
   5 -20   1 4.03541 4.18151   1
  -5 -20  -1 -2.1084  2.6316   1
  -5 -20  -1 7.58140 4.10508   1
  -5  20  -1 -2.3381  3.0279   1
   5  20   1 7.19219 4.03288   5
   5  20   1 2.00494 3.65975   1
   6 -20   1 57.5071  8.2123   1
  -6 -20  -1 31.2510  6.0755   1
   6  20   1 46.5263  7.4266   5
   6  20   1 34.8002  7.1077   1
  -6  20  -1 45.3001  7.6109   1
  -7 -20  -1 131.897  13.295   1
   7 -20   1 142.285  13.435   1
   7  20   1 121.763  12.912   1
  -7  20  -1 119.703  12.989   1
   7  20   1 122.248  12.404   5
  -8 -20  -1 31.9393  7.5044   1
   8 -20   1 56.7128  9.2759   1
  -8  20  -1 48.4786  8.8202   1
   8  20   1 45.3228  8.7898   1
   9 -20   1 26.2210  6.9891   1
  -9 -20  -1 13.0934  5.6128   1
   9  20   1 7.02198 5.70058   1
  -9  20  -1 13.0154  6.1468   1
   9  20   1 13.5237  6.2141   3
  10 -20   1 0.85925 4.61119   1
 -10 -20  -1 -1.7380  4.4468   1
  10  20   1 8.52274 5.80662   1
  10  20   1 -0.5421  5.6112   3
 -10  20  -1 8.77123 5.30551   1
 -11 -20  -1 1.57358 4.72759   1
  11 -20   1 8.77014 5.95107   1
  11  20   1 4.61531 5.93004   1
 -11  20  -1 4.79775 5.84001   1
 -11 -21   1 0.88611 4.72519   1
  11  21  -1 2.26964 5.94961   3
 -11  21   1 1.88977 5.24979   1
 -10 -21   1 27.8150  7.2640   1
 -10  21   1 6.06286 5.37863   1
  10  21  -1 15.6885  6.8228   1
  10  21  -1 10.9490  6.7217   3
   9 -21  -1 67.8189 10.2192   1
  -9 -21   1 83.3476 11.4329   1
  -9  21   1 98.0201 12.6206   1
   9  21  -1 76.1720 11.1902   1
   9  21  -1 96.6675 12.3173   3
   8 -21  -1 1.43800 4.23410   1
  -8 -21   1 5.97812 5.10585   1
   8  21  -1 0.24707 4.30880   1
  -8  21   1 -1.1817  3.9997   1
   7 -21  -1 296.926  16.866   1
  -7 -21   1 281.076  16.948   1
  -7 -21   1 199.448  15.006   1
   7  21  -1 285.161  17.405   1
  -7  21   1 327.748  18.583   1
   7  21  -1 323.271  18.802   5
  -6 -21   1 5.24991 4.04179   1
   6 -21  -1 15.3899  5.1304   1
  -6 -21   1 11.8208  4.5652   1
   6  21  -1 3.45593 3.99303   5
   6  21  -1 5.25366 4.38210   1
  -6  21   1 15.3130  5.1519   1
   5 -21  -1 212.720  13.723   1
  -5 -21   1 214.964  13.692   1
  -5  21   1 226.728  14.513   1
   5  21  -1 237.319  14.898   1
   5  21  -1 208.634  14.181   5
  -4 -21   1 -0.6965  2.9736   1
   4 -21  -1 10.5856  4.4140   1
   4 -21  -1 4.73695 2.69626   5
   4  21  -1 1.22790 3.79953   1
  -4  21   1 5.53687 3.83856   1
   4  21  -1 10.5908  4.4027   5
  -3 -21   1 216.834  13.642   1
   3 -21  -1 243.481  12.351   5
   3 -21  -1 263.836  14.523   1
  -3  21   1 230.832  14.243   1
   3  21  -1 266.499  14.921   1
   3  21  -1 243.767  14.432   5
   2 -21  -1 40.7592  6.5467   1
  -2 -21   1 37.5753  6.3217   1
   2 -21  -1 40.8491  5.1823   5
  -2 -21   1 35.3594  5.5035   5
  -2  21   1 39.7319  6.8323   1
   2  21  -1 31.6165  5.7422   5
   2  21  -1 47.0755  7.1039   1
  -1 -21   1 61.8673  7.8829   1
  -1 -21   1 71.2878  7.4683   5
   1 -21  -1 64.7750  7.6759   1
   1 -21  -1 71.7179  5.9831   5
   1  21  -1 79.6025  8.8141   1
  -1  21   1 59.8833  7.9634   1
   0 -21   1 163.727  11.024   1
   0 -21  -1 150.188   9.234   5
   0 -21   1 164.552  10.315   5
   0 -21  -1 184.165  11.203   1
   0  21  -1 139.375  10.821   1
   0  21   1 151.881  11.131   1
   1 -21   1 194.662  11.357   5
   1 -21   1 184.330  11.987   1
  -1 -21  -1 185.435  12.079   1
   1  21   1 209.540  12.807   1
  -1  21  -1 180.870  12.057   1
   1  21   1 187.184  10.932   5
   2 -21   1 123.726   9.998   1
  -2 -21  -1 125.003   9.797   1
   2 -21   1 140.122   9.406   5
  -2  21  -1 140.245  10.540   1
   2  21   1 133.694   9.511   5
  -2  21  -1 131.636   7.551   4
   2  21   1 145.363  11.171   1
   3 -21   1 5.16658 2.94449   5
  -3 -21  -1 -0.0861  3.3910   1
   3 -21   1 -3.1334  3.0563   1
  -3  21  -1 0.09807 3.66597   1
   3  21   1 -1.2266  3.6217   1
   3  21   1 -1.2939  2.7322   5
   4 -21   1 23.7027  4.9761   5
   4 -21   1 27.7318  6.2046   1
  -4 -21  -1 23.3362  5.8938   1
   4  21   1 30.3565  5.9437   5
   4  21   1 23.6191  5.9028   1
  -4  21  -1 19.6178  5.4539   1
   5 -21   1 1.75383 3.95411   1
  -5 -21  -1 5.15794 3.64987   1
  -5 -21  -1 -2.9819  2.5214   1
  -5  21  -1 0.10618 3.38724   1
   5  21   1 -2.4035  2.7193   5
   5  21   1 -1.7364  3.4274   1
  -6 -21  -1 9.84934 4.32109   1
   6 -21   1 2.99024 3.59638   1
  -6 -21  -1 2.97683 3.06157   1
   6  21   1 3.20366 4.26424   5
  -6  21  -1 -4.0632  3.2886   1
   6  21   1 1.62875 3.95486   1
  -7 -21  -1 18.0131  5.6464   1
   7 -21   1 47.1400  8.3069   1
   7  21   1 31.8226  7.0765   1
  -7  21  -1 42.0170  7.8588   1
   7  21   1 35.8358  7.2247   5
   8 -21   1 -2.7572  4.0320   1
  -8 -21  -1 0.22586 3.64601   1
   8  21   1 -0.7024  4.4615   1
  -8  21  -1 -3.0785  3.5894   1
   9 -21   1 56.8389  9.2257   1
  -9 -21  -1 36.9070  8.3787   1
   9  21   1 56.7389 10.2054   1
  -9  21  -1 52.1313  9.9747   1
 -10 -21  -1 54.8255  9.5764   1
  10 -21   1 72.9884 11.2112   1
  10  21   1 66.8574 10.6690   3
  10  21   1 76.7954 11.8034   1
 -10  21  -1 65.6911 11.0892   1
  11 -21   1 0.29582 5.25424   1
 -11 -21  -1 12.6059  6.5880   1
  11  21   1 1.18603 5.80749   1
 -11  21  -1 0.19822 5.35319   1
 -11 -22   1 36.9370  8.8092   1
 -11  22   1 41.0171  9.4648   1
  11  22  -1 43.1034  9.8883   3
 -10 -22   1 8.52347 5.59555   1
  10  22  -1 16.1154  6.7634   1
  10  22  -1 13.7905  7.0571   3
 -10  22   1 16.6677  7.0264   1
  -9 -22   1 20.3604  6.5086   1
   9 -22  -1 15.2450  6.0444   1
  -9  22   1 13.9077  6.6937   1
   9  22  -1 16.7433  7.0776   3
   9  22  -1 5.87997 5.49180   1
   8 -22  -1 0.72327 3.99809   1
  -8 -22   1 -1.8101  4.1356   1
   8  22  -1 -2.4492  4.2370   1
  -8  22   1 0.54510 4.88533   1
   7 -22  -1 115.359  12.197   1
  -7 -22   1 103.514  11.882   1
  -7 -22   1 116.955  12.546   1
   7  22  -1 125.893  13.460   5
   7  22  -1 117.211  12.550   1
  -7  22   1 128.680  13.426   1
  -6 -22   1 5.57256 3.79777   1
   6 -22  -1 4.83434 4.19916   1
  -6 -22   1 2.74928 3.58312   1
   6  22  -1 0.88706 4.27622   1
  -6  22   1 7.63907 4.81023   1
   6  22  -1 6.26598 4.25560   5
  -5 -22   1 19.5345  5.7213   1
   5 -22  -1 42.2031  6.9332   1
   5  22  -1 25.4127  6.2825   1
  -5  22   1 20.9724  5.9345   1
   5  22  -1 31.0047  6.5356   5
  -4 -22   1 304.568  16.700   1
   4 -22  -1 304.403  16.566   1
   4 -22  -1 282.926  14.195   5
   4  22  -1 281.174  16.470   1
  -4  22   1 272.724  16.424   1
   4  22  -1 287.183  16.596   5
  -3 -22   1 66.7402  8.3226   1
   3 -22  -1 53.9666  5.9309   5
   3 -22  -1 50.3855  7.5211   1
   3  22  -1 56.9985  7.6701   5
   3  22  -1 48.2982  7.5434   1
  -3  22   1 50.6982  7.8465   1
   2 -22  -1 101.781   7.411   5
  -2 -22   1 94.3771  9.9902   1
   2 -22  -1 112.178   9.280   1
  -2  22   1 121.648  11.604   1
   2  22  -1 119.387   9.351   5
   2  22  -1 103.347  10.472   1
  -1 -22   1 163.684  11.346   1
   1 -22  -1 137.115   8.705   5
  -1 -22   1 134.278   9.705   5
   1 -22  -1 136.927  10.238   1
   1  22  -1 161.472  11.339   1
  -1  22   1 152.075  11.133   1
   0 -22   1 70.0635  8.2444   1
   0 -22  -1 55.9958  7.5631   1
   0 -22   1 67.0224  7.2648   5
   0 -22  -1 51.0646  6.0124   5
   0  22  -1 59.9245  7.9912   1
   0  22   1 59.5019  8.0062   1
  -1 -22  -1 63.1368  7.9528   1
   1 -22   1 58.6370  7.0737   5
   1 -22   1 79.0118  9.0683   1
   1  22   1 60.8359  7.0536   5
  -1  22  -1 56.4968  7.8674   1
   1  22   1 64.5564  8.3462   1
   2 -22   1 89.7771  7.8632   5
  -2 -22  -1 111.839  10.661   1
   2 -22   1 108.340  10.652   1
   2  22   1 101.288  10.686   1
   2  22   1 113.305   8.849   5
  -2  22  -1 93.5412 10.0669   1
  -2  22  -1 98.5444  6.2551   4
  -3 -22  -1 299.211  16.232   1
   3 -22   1 298.084  16.391   1
   3 -22   1 298.995  15.140   5
  -3  22  -1 259.683  15.783   1
   3  22   1 275.210  16.070   1
   3  22   1 274.646  15.450   5
  -4 -22  -1 0.91994 3.25110   1
   4 -22   1 -1.5101  3.4645   1
   4  22   1 -0.2719  3.2958   5
   4  22   1 -2.2122  3.6530   1
  -4  22  -1 2.37431 3.62186   1
  -5 -22  -1 200.477  13.496   1
   5 -22   1 177.795  13.147   1
  -5 -22  -1 170.225  12.357   1
  -5  22  -1 180.749  13.330   1
   5  22   1 192.025  13.824   1
   5  22   1 171.040  12.541   5
  -6 -22  -1 7.38526 4.18350   1
  -6 -22  -1 9.03016 4.58220   1
   6 -22   1 -1.3356  3.5823   1
  -6  22  -1 7.90583 4.52718   1
   6  22   1 14.3663  5.2437   5
   6  22   1 5.51895 5.01125   1
   7 -22   1 255.931  16.812   1
  -7 -22  -1 284.475  17.425   1
   7  22   1 250.157  17.264   1
   7  22   1 261.170  17.242   5
  -7  22  -1 267.276  17.242   1
   8 -22   1 96.6160 12.0185   1
  -8 -22  -1 85.1641 11.3906   1
  -8  22  -1 89.7076 11.7230   1
   8  22   1 98.7183 11.9890   1
  -9 -22  -1 25.6327  7.0023   1
   9 -22   1 36.5902  7.9474   1
  -9  22  -1 41.7183  9.0020   1
   9  22   1 29.6746  7.7469   1
 -10 -22  -1 26.0549  7.9891   1
  10 -22   1 28.5285  7.7924   1
  10  22   1 24.0233  7.6077   1
 -10  22  -1 11.5324  6.4637   1
  10  22   1 15.9287  7.3540   3
 -11 -22  -1 2.28112 5.99635   1
  11 -22   1 10.3043  6.3415   1
  11  22   1 19.8917  7.6681   1
 -11  22  -1 1.84719 5.75105   1
 -11 -23   1 37.5519  9.1695   1
 -11  23   1 44.3365 10.1119   1
  11  23  -1 58.3859 11.2591   3
 -10 -23   1 42.1578  9.4262   1
  10  23  -1 36.4531  9.0541   1
 -10  23   1 46.7603  9.7966   1
  10  23  -1 56.8635 10.8249   3
   9 -23  -1 4.93973 5.13581   1
  -9 -23   1 5.31991 5.04684   1
   9  23  -1 4.49199 5.33722   1
  -9  23   1 -3.5710  4.4847   1
   9  23  -1 -1.0811  5.4635   3
  -8 -23   1 13.3159  5.9671   1
   8 -23  -1 5.81351 4.99827   1
   8  23  -1 9.71828 5.68988   1
  -8  23   1 4.41106 5.21336   1
   7 -23  -1 4.26099 4.19861   1
  -7 -23   1 8.09803 4.88521   1
  -7 -23   1 -3.5877  3.7312   1
   7  23  -1 0.76839 4.27251   1
  -7  23   1 0.61646 4.26978   1
   6 -23  -1 -4.2417  3.2526   1
  -6 -23   1 -2.5737  3.3710   1
  -6 -23   1 -2.7888  3.4661   1
  -6  23   1 -4.6505  3.1749   1
   6  23  -1 -2.2848  3.5968   5
   6  23  -1 -1.5394  3.6991   1
   5 -23  -1 96.2743 10.8789   1
  -5 -23   1 115.043  11.882   1
  -5  23   1 108.374  11.660   1
   5  23  -1 138.998  13.250   1
   5  23  -1 118.164  11.704   5
  -4 -23   1 35.0363  6.9049   1
   4 -23  -1 50.8805  7.9086   1
   4 -23  -1 41.6225  5.7443   5
   4  23  -1 40.6093  7.1314   1
   4  23  -1 38.8642  7.1834   5
  -4  23   1 54.3873  8.3484   1
   3 -23  -1 14.1524  3.4720   5
  -3 -23   1 18.2109  5.3257   1
   3 -23  -1 4.94041 3.64902   1
   3  23  -1 7.69119 4.12546   1
   3  23  -1 7.68000 3.92713   5
  -3  23   1 9.90862 4.75184   1
   2 -23  -1 3.50201 3.85869   1
   2 -23  -1 4.09013 2.58751   5
  -2 -23   1 7.24593 4.22605   1
  -2  23   1 4.68898 3.59816   1
   2  23  -1 3.25804 3.45861   5
   2  23  -1 14.3548  5.0887   1
   1 -23  -1 8.17544 2.63186   5
   1 -23  -1 12.8291  4.2446   1
  -1 -23   1 11.3655  4.2923   1
   1  23  -1 4.32526 4.01081   1
  -1  23   1 9.22217 4.41326   1
   0 -23   1 198.658  11.820   5
   0 -23  -1 187.897  12.227   1
   0 -23  -1 176.736  10.702   5
   0 -23   1 187.459  12.425   1
   0  23  -1 194.402  12.939   1
   0  23   1 229.555  13.726   1
   1 -23   1 76.6952  8.8493   1
  -1 -23  -1 79.6772  9.0995   1
   1 -23   1 86.4568  8.4668   5
   1  23   1 85.5143  9.6879   1
  -1  23  -1 64.4885  8.8442   1
   1  23   1 71.1405  7.6549   5
  -2 -23  -1 74.3376  8.8027   1
   2 -23   1 65.2372  8.5052   1
   2 -23   1 64.0863  7.4142   5
  -2  23  -1 65.3886  4.8809   4
   2  23   1 64.8481  8.9229   1
   2  23   1 76.6083  8.2731   5
   3 -23   1 13.8899  4.8072   1
   3 -23   1 6.53473 3.18336   5
  -3 -23  -1 6.96508 4.04669   1
  -3  23  -1 6.95567 2.76416   4
   3  23   1 13.2609  4.2982   5
  -3  23  -1 7.80670 4.46439   1
   3  23   1 5.62465 4.18417   1
   4 -23   1 50.6671  7.6702   1
  -4 -23  -1 50.3146  7.8189   1
   4  23   1 42.0771  6.8766   5
  -4  23  -1 43.5794  7.8023   1
   4  23   1 58.2365  8.5283   1
  -5 -23  -1 144.746  11.844   1
  -5 -23  -1 165.970  12.648   1
   5 -23   1 157.940  12.613   1
   5  23   1 149.065  11.835   5
  -5  23  -1 166.941  12.908   1
   5  23   1 163.399  12.706   1
  -6 -23  -1 -1.7562  3.5296   1
   6 -23   1 5.28085 4.39955   1
  -6 -23  -1 2.90621 4.22012   1
   6  23   1 2.62837 4.39553   5
  -6  23  -1 -1.7081  3.4749   1
   6  23   1 -0.5825  4.1980   1
   7 -23   1 7.55823 4.93246   1
  -7 -23  -1 -7.9466  2.7926   1
   7  23   1 10.9987  5.1002   5
  -7  23  -1 -2.3401  3.5720   1
   7  23   1 0.83914 4.74635   1
   8 -23   1 39.6839  8.4922   1
  -8 -23  -1 48.0781  9.0088   1
  -8  23  -1 42.5170  8.5643   1
   8  23   1 68.6030 10.5929   1
  -9 -23  -1 22.3930  6.6956   1
   9 -23   1 11.2713  6.3468   1
  -9  23  -1 27.6672  7.7583   1
   9  23   1 10.3959  6.1779   1
 -10 -23  -1 -0.1015  4.8058   1
  10 -23   1 7.80816 6.65126   1
  10  23   1 -0.5759  5.5090   1
 -10  23  -1 15.3114  6.8988   1
  10  23   1 9.00161 6.94923   3
 -11 -23  -1 14.7921  7.1797   1
  11 -23   1 25.3659  7.9318   1
 -11  23  -1 19.4304  8.5221   1
  11  23   1 10.3831  7.4979   1
 -10 -24   1 3.59768 5.40024   1
  10  24  -1 -1.6884  6.4786   3
 -10  24   1 -5.4293  4.9619   1
   9 -24  -1 160.380  15.437   1
  -9 -24   1 140.332  15.816   1
   9  24  -1 153.511  15.937   1
   9  24  -1 165.403  16.709   3
  -9  24   1 142.621  15.973   1
   8 -24  -1 5.56708 4.87057   1
  -8 -24   1 -2.7953  4.0005   1
   8  24  -1 10.4324  5.9237   1
  -8  24   1 6.22062 4.99958   1
  -7 -24   1 119.057  13.175   1
  -7 -24   1 133.663  13.932   1
   7 -24  -1 128.295  13.025   1
   7  24  -1 123.221  13.440   1
  -7  24   1 96.8287 12.5222   1
  -6 -24   1 142.459  12.000   1
   6 -24  -1 166.590  12.790   1
  -6 -24   1 117.024  12.645   1
   6  24  -1 146.610  14.161   5
  -6  24   1 138.793  14.039   1
   6  24  -1 151.945  14.254   1
   5 -24  -1 76.0341  9.7619   1
  -5 -24   1 51.1538  8.2425   1
  -5  24   1 64.3760  9.3289   1
   5  24  -1 59.6207  8.9527   5
   5  24  -1 86.1372 10.5383   1
   4 -24  -1 3.93554 3.81375   1
  -4 -24   1 1.47909 3.52794   1
  -4  24   1 2.19433 3.95766   1
   4  24  -1 6.90235 4.55602   1
   4  24  -1 16.2310  5.1472   5
   3 -24  -1 17.2412  4.0275   5
   3 -24  -1 10.8698  4.4350   1
  -3 -24   1 12.2363  5.0264   1
   3  24  -1 17.9323  5.5440   1
  -3  24   1 7.67898 4.41077   1
   3  24  -1 10.1344  4.4288   5
  -2 -24   1 53.5909  7.9873   1
   2 -24  -1 69.4748  8.5992   1
   2 -24  -1 62.2463  6.5936   5
  -2  24   1 75.3698  9.3357   1
   2  24  -1 60.9761  8.7864   1
   2  24  -1 55.1184  7.5912   5
   1 -24  -1 0.50568 2.05873   5
  -1 -24   1 0.25202 3.11386   1
   1 -24  -1 -1.9044  2.8980   1
  -1  24   1 3.43026 3.74511   1
   1  24  -1 3.43044 3.75577   1
   0 -24   1 105.502  10.671   1
   0 -24  -1 103.689   8.038   5
   0 -24  -1 104.180  10.497   1
   0  24  -1 100.824  10.955   1
   0  24   1 122.574  11.996   1
  -1 -24  -1 21.9254  5.5819   1
   1 -24   1 23.0160  5.7644   1
  -1  24  -1 14.3695  5.2663   1
   1  24   1 16.6739  5.1910   1
  -2 -24  -1 31.5825  6.5139   1
   2 -24   1 30.0055  6.1242   1
  -2  24  -1 21.1182  5.8200   1
   2  24   1 31.3136  5.7467   5
   2  24   1 28.6965  6.4394   1
   3 -24   1 -1.6890  2.9493   1
  -3 -24  -1 -0.5411  3.2763   1
   3  24   1 1.55286 3.30962   5
   3  24   1 3.55250 4.00105   1
  -3  24  -1 -1.2343  3.6207   1
  -4 -24  -1 12.2703  4.9800   1
   4 -24   1 15.2880  5.4362   1
  -4  24  -1 5.52485 4.39334   1
   4  24   1 18.8871  5.2002   5
   4  24   1 19.2832  6.0858   1
  -5 -24  -1 1.50083 3.57480   1
  -5 -24  -1 -0.4331  3.2838   1
   5 -24   1 -1.3475  3.3871   1
   5  24   1 12.8909  4.9274   5
   5  24   1 5.42933 4.61934   1
  -5  24  -1 2.34001 3.90856   1
  -6 -24  -1 188.604  14.001   1
   6 -24   1 175.609  13.817   1
  -6 -24  -1 158.183  13.246   1
  -6  24  -1 172.088  14.062   1
   6  24   1 184.919  14.077   5
   6  24   1 193.517  14.556   1
   7 -24   1 48.9027  8.6282   1
  -7 -24  -1 53.5846  9.0635   1
   7  24   1 52.2964  9.6237   1
  -7  24  -1 56.9235  9.6117   1
   8 -24   1 0.12714 4.67026   1
  -8 -24  -1 2.07748 4.48481   1
   8  24   1 6.34913 5.65037   1
  -8  24  -1 11.9056  5.4171   1
  -9 -24  -1 22.2018  7.3579   1
   9 -24   1 38.6167  8.6703   1
  -9  24  -1 24.3621  7.3276   1
   9  24   1 32.1551  8.4067   1
  10 -24   1 38.2310  9.2635   1
 -10 -24  -1 37.6580  9.0099   1
 -10  24  -1 52.7439 10.5789   1
  10  24   1 60.5261 10.9596   3
  10  24   1 60.2769 11.1410   1
 -10 -25   1 19.6060  7.3326   1
 -10  25   1 20.3759  7.4642   1
  10  25  -1 33.6793  9.1527   3
  -9 -25   1 0.76206 4.82622   1
   9  25  -1 4.60472 5.55790   1
  -9  25   1 1.15675 5.41236   1
   9  25  -1 4.58826 6.23861   3
   8 -25  -1 0.35566 4.43609   1
  -8 -25   1 1.44312 4.46855   1
   8  25  -1 -1.6676  4.3056   1
  -8  25   1 2.33278 5.06416   1
   7 -25  -1 33.7841  7.5502   1
  -7 -25   1 18.5424  6.6044   1
  -7 -25   1 36.2355  7.8942   1
   7  25  -1 40.7673  8.5454   1
  -7  25   1 30.0730  7.4942   1
  -6 -25   1 42.9556  8.0510   1
  -6 -25   1 26.9781  6.9757   1
   6 -25  -1 45.7696  7.9484   1
   6  25  -1 40.9901  8.0044   5
  -6  25   1 50.3295  8.9512   1
   6  25  -1 44.3720  8.3587   1
  -5 -25   1 1.34792 3.36813   1
   5 -25  -1 9.90714 4.65648   1
   5  25  -1 18.0238  6.0300   1
   5  25  -1 10.7754  5.0966   5
  -5  25   1 3.85337 4.33036   1
  -4 -25   1 22.5796  5.9361   1
   4 -25  -1 20.2282  5.9335   1
   4  25  -1 27.4563  6.6274   1
  -4  25   1 23.4969  6.5220   1
   4  25  -1 27.7230  6.4111   5
   3 -25  -1 41.1712  7.4414   1
  -3 -25   1 41.8685  7.2507   1
  -3  25   1 29.9941  6.7033   1
   3  25  -1 30.2306  6.2932   5
   3  25  -1 32.4612  6.9673   1
   2 -25  -1 79.5695  9.5420   1
  -2 -25   1 86.6468  9.9590   1
   2  25  -1 88.7415 10.2256   1
   2  25  -1 84.2513  9.3581   5
  -2  25   1 71.2672  9.3608   1
  -1 -25   1 2.48514 3.43445   1
   1 -25  -1 4.61429 2.67836   5
   1 -25  -1 0.56654 3.72313   1
  -1  25   1 3.83226 4.24869   1
   1  25  -1 7.45555 4.52621   1
   0 -25  -1 68.6481  7.5478   5
   0 -25  -1 72.0384  9.0391   1
   0 -25   1 73.7819  9.1978   1
   0  25  -1 80.3960 10.0246   1
   0  25   1 81.1041 10.1124   1
   1 -25   1 199.431  13.253   1
  -1 -25  -1 178.910  12.866   1
  -1  25  -1 191.382  13.174   1
   1  25   1 182.203  13.593   1
   2 -25   1 18.4843  5.6136   1
  -2 -25  -1 17.9568  5.1950   1
  -2  25  -1 13.0704  5.2329   1
   2  25   1 35.8902  7.2778   1
   2  25   1 19.8251  4.9407   5
  -3 -25  -1 -2.4364  3.0162   1
   3 -25   1 -0.6404  3.6990   1
   3  25   1 1.50765 3.96356   1
   3  25   1 -1.9112  2.9427   5
  -3  25  -1 2.75648 3.87171   1
   4 -25   1 7.58480 4.67484   1
  -4 -25  -1 2.39912 4.04053   1
   4  25   1 13.6331  5.6227   1
  -4  25  -1 4.40005 4.22368   1
   4  25   1 5.02024 4.06023   5
  -5 -25  -1 7.21781 4.80959   1
  -5 -25  -1 13.1847  5.1964   1
   5 -25   1 26.1839  6.7105   1
  -5  25  -1 21.8071  6.5306   1
   5  25   1 21.0662  5.9152   5
   5  25   1 20.7305  6.1875   1
  -6 -25  -1 7.75658 5.22929   1
  -6 -25  -1 8.91993 5.01399   1
   6 -25   1 8.89115 4.96121   1
   6  25   1 10.1818  5.2730   1
   6  25   1 18.2096  6.1400   5
  -6  25  -1 10.0836  5.5315   1
   7 -25   1 18.8717  6.3732   1
  -7 -25  -1 7.84584 5.38589   1
  -7  25  -1 15.7785  6.2970   1
   7  25   1 3.53359 5.64955   1
  -8 -25  -1 31.4940  8.1566   1
   8 -25   1 39.4034  8.6447   1
   8  25   1 40.3982  8.8502   1
  -8  25  -1 55.8623 10.3040   1
  -9 -25  -1 10.2624  5.8008   1
   9 -25   1 -1.4290  4.8573   1
   9  25   1 0.84806 5.57560   1
  -9  25  -1 0.35613 5.08051   1
 -10 -25  -1 -0.1695  4.9211   1
  10 -25   1 10.2575  6.8027   1
 -10  25  -1 7.23353 6.17428   1
  10  25   1 0.43118 6.27411   3
  10  25   1 19.2775  7.3708   1
 -10 -26   1 4.30078 5.74502   1
  10  26  -1 5.34989 7.07757   3
 -10  26   1 -4.5491  4.8169   1
  -9 -26   1 6.27979 5.32215   1
   9  26  -1 6.50879 5.99587   1
   9  26  -1 3.52472 6.96231   3
  -9  26   1 8.50757 5.98333   1
   8 -26  -1 6.58353 5.29110   1
  -8 -26   1 4.58602 5.03491   1
  -8  26   1 2.56749 5.33770   1
   8  26  -1 -0.5946  4.7292   1
  -7 -26   1 -4.4885  3.7161   1
  -7 -26   1 2.08294 4.31857   1
   7 -26  -1 4.65748 4.78825   1
  -7  26   1 -1.9899  4.1027   1
   7  26  -1 1.51641 4.63263   1
  -6 -26   1 4.94126 4.35469   1
  -6 -26   1 5.95696 4.64513   1
   6 -26  -1 7.48720 4.83903   1
   6  26  -1 -4.2175  3.2406   1
  -6  26   1 3.14634 4.52582   1
  -5 -26   1 41.3820  7.9990   1
   5 -26  -1 20.0285  6.2732   1
   5  26  -1 31.6089  7.3618   1
  -5  26   1 36.0436  7.7511   1
   5  26  -1 56.8100  8.9851   5
   4 -26  -1 -4.6662  3.3588   1
  -4 -26   1 1.62270 3.83964   1
  -4  26   1 3.84125 4.22249   1
   4  26  -1 -0.5078  4.0325   1
   4  26  -1 7.51367 4.50485   5
   3 -26  -1 0.72451 3.52070   1
  -3 -26   1 0.97943 3.56815   1
   3  26  -1 3.73823 3.78063   5
  -3  26   1 0.70670 3.84508   1
   3  26  -1 -1.0487  3.7344   1
   2 -26  -1 -1.1786  3.2632   1
  -2 -26   1 2.58272 3.69139   1
   2  26  -1 -1.9445  3.4668   1
  -2  26   1 0.63500 3.68356   1
   2  26  -1 -1.2606  2.8926   5
   1 -26  -1 7.20816 4.21701   1
  -1 -26   1 6.27353 4.48631   1
   1  26  -1 -0.3808  3.5117   1
  -1  26   1 13.5770  5.1161   1
   0 -26  -1 23.1250  4.7378   5
   0 -26   1 22.3089  5.6861   1
   0 -26  -1 36.2932  6.8455   1
   0  26  -1 27.8793  6.5382   1
   0  26   1 20.1243  6.3073   1
  -1 -26  -1 24.6386  5.9463   1
   1 -26   1 22.0122  6.1009   1
   1  26   1 26.1645  6.5859   1
  -1  26  -1 38.9746  7.2849   1
  -2 -26  -1 55.6429  8.3006   1
   2 -26   1 51.5642  8.2594   1
  -2  26  -1 65.6685  9.1822   1
   2  26   1 53.3656  8.6333   1
   2  26   1 53.5387  7.3994   5
   3 -26   1 0.61806 3.53441   1
  -3 -26  -1 7.91837 4.23843   1
   3  26   1 3.04341 3.96582   1
  -3  26  -1 1.27692 4.34137   1
   3  26   1 2.38139 3.67659   5
  -4 -26  -1 58.7177  8.8890   1
   4 -26   1 47.9529  8.1185   1
   4  26   1 33.5275  7.8176   1
   4  26   1 57.2354  8.2316   5
  -4  26  -1 40.7289  7.9281   1
  -5 -26  -1 25.5196  6.6597   1
   5 -26   1 27.1183  6.8778   1
  -5 -26  -1 17.5929  6.1185   1
   5  26   1 8.87254 5.12488   5
  -5  26  -1 30.4413  7.1172   1
   5  26   1 28.4292  7.4098   1
   6 -26   1 -3.8267  3.6170   1
  -6 -26  -1 -1.4213  4.0258   1
  -6 -26  -1 4.69222 4.72950   1
   6  26   1 -1.9285  4.3521   5
   6  26   1 6.12114 5.27717   1
  -6  26  -1 -0.7173  3.9820   1
   7 -26   1 77.7450 11.0383   1
  -7 -26  -1 63.5085 10.1161   1
  -7  26  -1 52.1890  9.6799   1
   7  26   1 68.3675 10.8576   1
   8 -26   1 6.17159 5.64150   1
  -8 -26  -1 8.57276 5.47052   1
   8  26   1 9.06429 6.14080   1
  -8  26  -1 8.84538 5.95163   1
  -9 -26  -1 17.0179  6.1432   1
   9 -26   1 9.52096 6.49395   1
  -9  26  -1 24.7529  8.2822   1
   9  26   1 24.7907  8.0801   1
  10 -26   1 1.59952 5.99059   1
 -10 -26  -1 23.4478  7.4462   1
 -10  26  -1 13.9597  7.2825   1
  10  26   1 10.9612  7.9962   3
  10  26   1 18.2494  7.8245   1
  -9 -27   1 40.0450  9.5828   1
   9  27  -1 51.5773  9.8926   1
  -9  27   1 34.8383  8.9987   1
   9  27  -1 39.9494 10.4824   3
   8 -27  -1 14.4016  6.4026   1
  -8 -27   1 11.4601  5.8606   1
   8  27  -1 13.8408  6.6322   1
  -8  27   1 6.89536 5.69650   1
   7 -27  -1 1.26318 4.49858   1
  -7 -27   1 5.96977 5.16100   1
  -7 -27   1 3.41974 4.96877   1
   7  27  -1 4.86817 5.22182   1
  -7  27   1 4.04226 4.72830   1
  -6 -27   1 23.8946  6.9681   1
  -6 -27   1 30.5730  7.6275   1
   6 -27  -1 28.1384  7.2661   1
   6  27  -1 14.2435  5.9670   1
  -6  27   1 34.5310  8.1544   1
   5 -27  -1 45.2406  8.2580   1
  -5 -27   1 44.1305  8.3278   1
   5  27  -1 30.9124  7.6017   1
  -5  27   1 44.2701  8.7394   1
   5  27  -1 30.5813  7.0699   5
   4 -27  -1 20.0149  5.8022   1
  -4 -27   1 22.9119  6.3190   1
   4  27  -1 15.8359  5.6033   5
   4  27  -1 18.7450  6.0198   1
  -4  27   1 18.8233  5.9348   1
   3 -27  -1 11.0204  4.9330   1
  -3 -27   1 7.91580 4.85607   1
   3  27  -1 10.5918  5.0960   5
   3  27  -1 17.7195  5.7737   1
  -3  27   1 1.60237 3.62622   1
   2 -27  -1 -0.4223  3.1830   1
  -2 -27   1 0.56798 3.51242   1
  -2  27   1 -0.6355  3.6906   1
   2  27  -1 5.84312 4.71129   1
   1 -27  -1 39.9816  7.3778   1
  -1 -27   1 42.9406  7.6044   1
  -1  27   1 39.5866  7.4442   1
   1  27  -1 63.1144  9.2577   1
   0 -27   1 58.0983  8.7519   1
   0 -27  -1 62.5679  8.8068   1
   0  27  -1 73.3653  9.8323   1
   0  27   1 73.5673 10.0771   1
  -1 -27  -1 0.59310 3.74924   1
   1 -27   1 9.29046 4.54387   1
   1  27   1 6.23697 4.78352   1
  -1  27  -1 5.52661 4.75442   1
   2 -27   1 72.0296  9.7601   1
  -2 -27  -1 82.6827 10.3527   1
  -2  27  -1 100.447  11.584   1
   2  27   1 68.3828  9.9010   1
   2  27   1 74.2038  8.7997   5
  -3 -27  -1 -2.6273  3.3561   1
   3 -27   1 9.41387 4.52161   1
   3  27   1 8.84196 5.18233   1
  -3  27  -1 3.99819 4.31920   1
   3  27   1 1.71981 3.53580   5
  -4 -27  -1 52.8748  8.7046   1
   4 -27   1 52.5843  8.9278   1
  -4  27  -1 67.8766 10.0625   1
   4  27   1 60.4966  8.8041   5
   4  27   1 59.9393  9.7963   1
  -5 -27  -1 31.2272  7.1474   1
  -5 -27  -1 36.9386  7.9493   1
   5 -27   1 34.7379  7.3664   1
   5  27   1 52.4181  9.4665   1
   5  27   1 33.7696  7.1156   5
  -5  27  -1 51.7999  9.1839   1
  -6 -27  -1 7.46473 4.86158   1
  -6 -27  -1 2.06238 4.33811   1
   6 -27   1 0.77540 4.47420   1
  -6  27  -1 -6.0017  3.9137   1
   6  27   1 4.79483 4.89374   1
  -7 -27  -1 1.80519 4.74411   1
   7 -27   1 0.97530 4.70842   1
   7  27   1 3.75365 5.29371   1
  -7  27  -1 -1.9334  4.2070   1
  -8 -27  -1 58.9596 10.5081   1
   8 -27   1 66.2972 11.1805   1
   8  27   1 57.5960 10.4049   1
  -8  27  -1 59.0943 10.7469   1
   9 -27   1 7.66742 5.76351   1
  -9 -27  -1 7.14212 5.91610   1
   9  27   1 8.11534 6.90189   1
  -9  27  -1 5.79971 5.60035   1
  -9 -28   1 -2.1553  4.3930   1
  -9  28   1 0.61355 5.48424   1
   9  28  -1 0.60332 6.73333   3
   8 -28  -1 23.3553  7.5179   1
  -8 -28   1 28.2660  7.6572   1
  -8  28   1 15.4819  7.2615   1
   8  28  -1 21.3010  7.8611   1
  -7 -28   1 -3.6745  4.1034   1
  -7 -28   1 8.74894 5.03493   1
   7 -28  -1 -1.5728  4.9868   1
   7  28  -1 -6.3404  4.3678   1
  -7  28   1 10.5569  6.0891   1
  -6 -28   1 48.9122  9.3140   1
  -6 -28   1 46.3327  9.2090   1
   6 -28  -1 43.8550  8.5876   1
  -6  28   1 49.7260  9.4884   1
   6  28  -1 39.0825  8.3657   1
   5 -28  -1 2.68714 4.54920   1
  -5 -28   1 -0.4693  3.7773   1
  -5  28   1 -4.0004  3.7040   1
   5  28  -1 -0.6901  4.4312   1
   4 -28  -1 27.9184  7.0620   1
  -4 -28   1 37.7538  7.8991   1
  -4  28   1 27.4514  7.1564   1
   4  28  -1 21.3179  6.3181   5
   4  28  -1 32.5198  7.4565   1
  -3 -28   1 0.21655 4.16249   1
   3 -28  -1 0.83879 4.05228   1
   3  28  -1 2.27863 4.34169   1
  -3  28   1 -6.3129  3.1326   1
   3  28  -1 4.41349 4.23197   5
  -2 -28   1 27.7608  6.9976   1
   2 -28  -1 21.0609  5.9353   1
  -2  28   1 17.2677  6.0234   1
   2  28  -1 26.5632  7.1011   1
   1 -28  -1 76.2916  9.8941   1
  -1 -28   1 71.3110  9.9038   1
   1  28  -1 59.9659  9.5919   1
  -1  28   1 63.9266  9.7534   1
   0 -28   1 46.4277  8.1163   1
   0 -28  -1 67.1683  9.2380   1
   0  28   1 55.0801  9.3044   1
   0  28  -1 48.9111  8.6513   1
  -1 -28  -1 2.74472 3.83806   1
   1 -28   1 1.51448 3.86558   1
  -1  28  -1 2.23017 4.47482   1
   1  28   1 6.48653 4.56558   1
   2 -28   1 -3.8556  3.7108   1
  -2 -28  -1 -4.6743  3.2410   1
   2  28   1 4.36023 4.18218   1
  -2  28  -1 -0.2956  3.7208   1
  -3 -28  -1 53.6113  9.0244   1
   3 -28   1 57.0317  8.8645   1
  -3  28  -1 58.1755  9.5389   1
   3  28   1 42.3441  8.5608   1
   3  28   1 52.8120  8.0236   5
   4 -28   1 14.4378  5.7422   1
  -4 -28  -1 13.3761  5.1387   1
   4  28   1 9.32758 5.10575   5
  -4  28  -1 1.60972 5.18591   1
   4  28   1 5.44179 5.03422   1
   5 -28   1 -4.3284  4.0732   1
  -5 -28  -1 3.92611 4.36015   1
  -5 -28  -1 1.95947 4.29458   1
   5  28   1 8.81899 5.05745   5
  -5  28  -1 3.38994 4.96943   1
   5  28   1 0.50392 4.80417   1
  -6 -28  -1 4.44593 4.51186   1
   6 -28   1 5.11564 5.43457   1
  -6 -28  -1 10.8468  5.4127   1
  -6  28  -1 1.45581 4.95924   1
   6  28   1 5.56534 5.67468   1
   7 -28   1 -2.8858  4.2225   1
  -7 -28  -1 -3.3905  4.2623   1
  -7  28  -1 10.6097  6.0725   1
   7  28   1 0.56635 5.46014   1
  -8 -28  -1 28.2855  8.1846   1
   8 -28   1 56.4530 10.0517   1
   8  28   1 57.5905 10.6858   1
  -8  28  -1 57.8134 10.9505   1
   9 -28   1 1.20401 5.37356   1
  -9 -28  -1 8.17965 5.62195   1
   9  28   1 -2.4906  5.4176   1
  -9  28  -1 3.06073 5.60692   1
  -9 -29   1 6.28271 5.56750   1
  -9  29   1 14.7305  6.4455   1
  -8 -29   1 -0.1927  4.9466   1
   8  29  -1 3.45497 5.47250   1
  -8  29   1 9.12949 5.93762   1
  -7 -29   1 -4.5795  4.0893   1
  -7 -29   1 7.05886 5.61522   1
   7 -29  -1 -0.2600  4.7012   1
   7  29  -1 9.54680 6.28555   1
  -7  29   1 -2.1605  4.4208   1
   6 -29  -1 5.26254 5.11250   1
  -6 -29   1 2.66840 4.45432   1
  -6 -29   1 2.30014 4.84001   1
  -6  29   1 4.34326 5.09366   1
   6  29  -1 -1.8848  4.4424   1
   5 -29  -1 1.44150 4.66205   1
  -5 -29   1 1.61805 4.24333   1
   5  29  -1 -2.3472  4.7803   1
  -5  29   1 1.68488 4.80310   1
  -4 -29   1 68.2977 10.2734   1
   4 -29  -1 66.3352  9.9207   1
   4  29  -1 56.0720  9.4514   1
  -4  29   1 53.6748  9.4492   1
   4  29  -1 84.2828 10.6972   5
   3 -29  -1 19.7407  5.7860   1
  -3 -29   1 23.0630  6.3646   1
  -3  29   1 25.9464  7.0003   1
   3  29  -1 17.4142  6.0774   5
   3  29  -1 14.7778  6.0931   1
   2 -29  -1 29.5848  7.1006   1
  -2 -29   1 34.6611  7.4264   1
   2  29  -1 35.9249  7.8726   1
  -2  29   1 34.4514  7.6943   1
  -1 -29   1 2.84366 4.45320   1
   1 -29  -1 -1.7297  3.6074   1
  -1  29   1 -2.7238  3.9483   1
   1  29  -1 1.34357 4.33482   1
   0 -29  -1 42.5469  7.7596   1
   0 -29   1 46.2599  8.0846   1
   0  29   1 35.0950  7.7829   1
   0  29  -1 37.3333  8.2046   1
  -1 -29  -1 14.2426  5.6421   1
   1 -29   1 6.32365 4.79279   1
  -1  29  -1 6.35022 5.07686   1
   1  29   1 18.8125  6.3101   1
  -2 -29  -1 4.91535 4.82652   1
   2 -29   1 7.36370 4.45117   1
  -2  29  -1 2.71519 4.42490   1
   2  29   1 2.69144 4.28418   1
   3 -29   1 0.26959 3.89925   1
  -3 -29  -1 3.93222 4.21782   1
   3  29   1 5.55066 4.41023   5
  -3  29  -1 -1.9130  4.1625   1
   3  29   1 2.88519 4.51928   1
   4 -29   1 9.01471 5.37315   1
  -4 -29  -1 5.02044 5.01280   1
   4  29   1 6.28024 4.69525   5
  -4  29  -1 11.3165  6.3101   1
   4  29   1 11.6711  5.6497   1
  -5 -29  -1 5.91854 4.96415   1
   5 -29   1 10.4504  5.5224   1
  -5 -29  -1 -1.1308  4.1167   1
   5  29   1 -3.7892  4.7228   1
  -5  29  -1 0.28931 4.06924   1
   6 -29   1 5.47438 5.03403   1
  -6 -29  -1 -3.5639  3.8541   1
  -6 -29  -1 -3.2738  3.8814   1
  -6  29  -1 5.50743 5.35866   1
   6  29   1 4.55697 5.31799   1
   7 -29   1 30.3198  7.8548   1
  -7 -29  -1 23.6165  7.4435   1
  -7  29  -1 33.4626  8.9681   1
   7  29   1 21.6955  7.6747   1
  -8 -29  -1 1.54454 4.77562   1
   8 -29   1 -0.1244  5.3681   1
  -8  29  -1 -3.1355  4.2967   1
   8  29   1 2.40971 5.81686   1
  -8 -30   1 14.0321  7.3520   1
   8  30  -1 10.3245  6.5204   1
  -8  30   1 -2.0853  5.2143   1
   7 -30  -1 5.22448 5.68913   1
  -7 -30   1 4.53206 5.70956   1
  -7 -30   1 0.88474 4.74594   1
   7  30  -1 4.11899 6.30510   1
  -7  30   1 10.4226  6.8517   1
  -6 -30   1 -2.0881  4.6240   1
  -6 -30   1 3.09975 4.77135   1
   6 -30  -1 0.34786 4.53288   1
  -6  30   1 -3.9000  4.0864   1
   6  30  -1 0.39939 5.31207   1
  -5 -30   1 -1.0104  4.2398   1
   5 -30  -1 -5.0950  3.5761   1
  -5  30   1 1.49347 4.93565   1
   5  30  -1 5.08898 5.69018   1
  -4 -30   1 185.860  14.690   1
   4 -30  -1 189.915  14.797   1
   4  30  -1 180.449  17.172   1
  -3 -30   1 9.82774 5.16625   1
   3 -30  -1 -0.6713  4.0546   1
  -3  30   1 -0.0977  4.5675   1
   3  30  -1 -0.7879  3.9424   1
  -2 -30   1 7.07070 5.08322   1
   2 -30  -1 7.09712 4.56696   1
   2  30  -1 12.3917  6.0114   1
  -2  30   1 -0.5138  4.1344   1
  -1 -30   1 6.79210 4.84064   1
   1 -30  -1 -1.8464  3.9124   1
  -1  30   1 5.64080 5.43431   1
   1  30  -1 9.36825 5.77895   1
   0 -30   1 177.173  13.928   1
   0 -30  -1 192.586  14.223   1
   0  30   1 229.484  16.122   1
   0  30  -1 190.495  15.104   1
   1 -30   1 16.1140  6.2701   1
  -1 -30  -1 24.5584  6.6294   1
   1  30   1 18.9753  6.5411   1
  -1  30  -1 23.5891  6.7013   1
  -2 -30  -1 83.5127 11.1702   1
   2 -30   1 121.128  13.081   1
  -2  30  -1 94.8980 12.0661   1
   2  30   1 94.3871 12.1772   1
   3 -30   1 9.84160 5.42469   1
  -3 -30  -1 3.60852 4.45683   1
  -3  30  -1 2.99900 4.42641   1
   3  30   1 7.79105 4.99016   5
   3  30   1 -3.1862  4.1518   1
   4 -30   1 9.14485 5.34624   1
  -4 -30  -1 5.00472 4.97504   1
   4  30   1 3.01535 4.75166   5
   4  30   1 3.58341 5.05231   1
  -4  30  -1 3.90718 4.74611   1
  -5 -30  -1 7.95829 5.48168   1
   5 -30   1 8.15498 6.06171   1
  -5 -30  -1 6.83819 4.94118   1
   5  30   1 2.44598 5.27657   1
  -5  30  -1 8.91834 5.81990   1
  -6 -30  -1 -1.1261  4.2741   1
   6 -30   1 3.84215 5.48903   1
  -6 -30  -1 10.1951  5.5134   1
  -6  30  -1 -0.4753  4.7867   1
   6  30   1 8.32119 6.04068   1
  -7 -30  -1 24.5699  7.5201   1
   7 -30   1 7.64715 6.02834   1
   7  30   1 16.2651  6.6315   1
  -7  30  -1 20.5455  7.3875   1
  -8 -30  -1 18.2151  7.1930   1
   8 -30   1 10.8813  6.3373   1
   8  30   1 14.2360  7.7184   1
  -8  30  -1 18.4474  8.2458   1
  -8 -31   1 76.7559 12.9049   1
  -7 -31   1 85.9046 12.8271   1
  -7 -31   1 86.9359 12.5858   1
  -7  31   1 103.304  14.460   1
   7  31  -1 82.5813 12.7938   1
   6 -31  -1 -0.7325  4.5435   1
  -6 -31   1 -4.0301  4.2364   1
  -6 -31   1 -1.3989  4.9213   1
   6  31  -1 0.19836 5.22210   1
  -6  31   1 -1.2518  4.9368   1
   5 -31  -1 2.94846 4.72654   1
  -5 -31   1 1.72408 4.71843   1
   5  31  -1 -5.3020  4.3646   1
  -5  31   1 -1.6498  4.7035   1
  -4 -31   1 -2.5655  4.0906   1
   4 -31  -1 2.12440 4.76783   1
  -4  31   1 5.58516 5.15461   1
   4  31  -1 0.68764 4.84638   1
  -3 -31   1 3.67075 4.55916   1
   3 -31  -1 -1.0034  4.2380   1
   3  31  -1 -3.2378  4.2812   1
  -3  31   1 7.39335 5.89607   1
  -2 -31   1 30.2487  7.9583   1
   2 -31  -1 40.8207  8.1598   1
   2  31  -1 29.3521  7.7204   1
  -2  31   1 36.3380  7.9649   1
  -1 -31   1 6.10135 5.03527   1
   1 -31  -1 5.88820 4.93342   1
   1  31  -1 11.9215  6.0586   1
  -1  31   1 3.55381 5.05292   1
   0 -31  -1 11.9707  5.3785   1
   0 -31   1 1.97808 4.07961   1
   0  31   1 7.24245 5.45382   1
   0  31  -1 3.56290 4.96544   1
  -1 -31  -1 52.9782  8.8881   1
   1 -31   1 54.0250  9.2630   1
   1  31   1 86.5957 12.2475   1
  -1  31  -1 34.1817  8.1751   1
  -2 -31  -1 224.329  15.878   1
   2 -31   1 213.749  15.845   1
   2  31   1 189.708  15.574   1
  -2  31  -1 206.759  15.974   1
  -3 -31  -1 0.73370 4.35693   1
   3 -31   1 3.49662 4.99571   1
  -3  31  -1 -1.0938  4.4524   1
   3  31   1 3.89880 4.81738   1
  -4 -31  -1 125.221  13.883   1
   4 -31   1 106.461  13.009   1
  -4  31  -1 117.428  14.417   1
   4  31   1 92.7401 12.6561   1
  -5 -31  -1 3.48549 5.16648   1
   5 -31   1 -1.9189  4.5704   1
  -5 -31  -1 -4.2117  4.1739   1
  -5  31  -1 3.68063 5.12120   1
   5  31   1 5.33456 6.11953   1
  -6 -31  -1 -5.3883  4.4146   1
  -6 -31  -1 0.67745 5.17549   1
   6 -31   1 0.95813 5.16376   1
   6  31   1 -3.9899  4.9135   1
  -6  31  -1 1.37873 4.43656   1
   7 -31   1 24.6547  7.6171   1
  -7 -31  -1 7.99331 5.63217   1
  -7  31  -1 29.2940  8.7447   1
   7  31   1 16.7896  7.0275   1
  -7 -32   1 0.83468 5.18161   1
  -7 -32   1 -0.7402  5.5798   1
   7  32  -1 10.6366  6.7818   1
  -7  32   1 2.33492 5.48276   1
   6 -32  -1 12.3412  6.5154   1
  -6 -32   1 6.38591 5.11218   1
  -6 -32   1 5.38568 5.41013   1
   6  32  -1 2.03452 4.90986   1
  -6  32   1 7.79659 6.39155   1
   5 -32  -1 12.6507  6.5883   1
  -5 -32   1 19.4595  6.9648   1
   5  32  -1 14.9670  6.6985   1
  -5  32   1 16.8462  6.8754   1
  -4 -32   1 7.72364 5.85141   1
   4 -32  -1 3.50223 5.24546   1
  -4  32   1 1.25377 5.04351   1
   4  32  -1 -0.7037  5.1736   1
   3 -32  -1 3.53312 4.75251   1
  -3 -32   1 -1.3674  4.5909   1
  -3  32   1 -2.3882  4.0048   1
   3  32  -1 -1.6195  4.6228   1
  -2 -32   1 5.91697 5.03713   1
   2 -32  -1 -4.7701  3.4544   1
  -2  32   1 -0.8424  4.6095   1
   2  32  -1 3.43568 5.22509   1
  -1 -32   1 112.214  13.014   1
   1 -32  -1 90.4054 12.0085   1
  -1  32   1 85.1450 12.0336   1
   1  32  -1 93.9932 12.7366   1
   0 -32   1 16.3841  6.1110   1
   0 -32  -1 10.2009  5.5341   1
   0  32   1 27.3658  7.8151   1
   0  32  -1 8.97551 5.45607   1
  -1 -32  -1 -3.0896  4.2659   1
   1 -32   1 1.44726 4.49888   1
   1  32   1 3.13733 4.99905   1
  -1  32  -1 7.36000 5.81948   1
   2 -32   1 38.2878  8.1291   1
  -2 -32  -1 46.1906  8.5479   1
  -2  32  -1 57.2335  9.9276   1
   2  32   1 47.8580  9.8054   1
  -3 -32  -1 35.4844  8.2905   1
   3 -32   1 19.6132  6.6528   1
  -3  32  -1 30.7590  7.9693   1
   3  32   1 15.2664  6.8684   1
   4 -32   1 5.80389 4.89823   1
  -4 -32  -1 0.99142 4.92629   1
   4  32   1 -0.6340  5.1657   1
  -4  32  -1 8.32128 5.93288   1
  -5 -32  -1 -1.7798  4.2105   1
  -5 -32  -1 1.87751 4.55147   1
   5 -32   1 2.40366 5.30519   1
   5  32   1 9.14696 6.08370   1
  -5  32  -1 7.12190 4.94376   1
  -6 -32  -1 4.33092 5.58042   1
  -6 -32  -1 -1.7136  5.1464   1
   6 -32   1 1.53575 5.28498   1
  -6  32  -1 -4.1310  4.9088   1
   6  32   1 -1.8995  5.2815   1
  -7 -32  -1 40.0415  9.3955   1
   7 -32   1 40.3497  9.5949   1
   7  32   1 40.0144  9.9463   1
  -7  32  -1 57.3733 10.7537   1
  -6 -33   1 16.6160  6.9241   1
  -6 -33   1 18.9193  7.4500   1
   6  33  -1 17.4864  7.4573   1
  -6  33   1 17.1190  7.8793   1
  -5 -33   1 28.8650  8.0766   1
   5 -33  -1 29.6508  8.0694   1
  -5  33   1 38.0237  9.4402   1
   5  33  -1 24.8536  8.0127   1
  -4 -33   1 0.72523 4.45468   1
   4 -33  -1 6.40767 5.53372   1
   4  33  -1 -5.2367  4.6393   1
  -4  33   1 0.95455 4.88907   1
  -3 -33   1 179.187  15.014   1
   3 -33  -1 202.682  15.700   1
  -3  33   1 184.988  18.372   1
   3  33  -1 190.533  18.367   1
  -2 -33   1 34.3200  8.4082   1
   2 -33  -1 33.0373  7.8813   1
   2  33  -1 31.7514  8.4707   1
  -2  33   1 30.9660  8.0668   1
  -1 -33   1 -4.8042  3.9014   1
   1 -33  -1 4.52999 5.42986   1
  -1  33   1 6.25643 5.34576   1
   1  33  -1 -0.5789  4.5164   1
   0 -33   1 37.5276  8.3145   1
   0 -33  -1 44.3295  8.5141   1
   0  33  -1 44.8100  9.0398   1
   0  33   1 39.1139  9.2205   1
  -1 -33  -1 190.045  14.873   1
   1 -33   1 161.307  16.285   1
  -1  33  -1 215.240  16.804   1
   1  33   1 179.974  18.076   1
   2 -33   1 33.8312  8.2502   1
  -2 -33  -1 26.4858  7.6160   1
  -2  33  -1 25.4879  7.9220   1
   2  33   1 27.7093  8.2484   1
  -3 -33  -1 3.07345 4.40115   1
   3 -33   1 6.91786 5.49367   1
  -3  33  -1 -3.1624  4.3006   1
   3  33   1 1.26876 5.12724   1
   4 -33   1 19.2390  7.0529   1
  -4 -33  -1 10.3260  5.8010   1
  -4  33  -1 21.6293  7.8311   1
   4  33   1 21.2214  7.3124   1
  -5 -33  -1 5.55694 5.17535   1
  -5 -33  -1 -0.7949  5.0486   1
   5 -33   1 -4.5250  4.3990   1
   5  33   1 9.96999 6.30708   1
  -5  33  -1 -0.5663  5.5652   1
  -6 -33  -1 28.4118  8.0242   1
  -6 -33  -1 15.7932  6.8841   1
   6 -33   1 25.8897  7.9593   1
   6  33   1 16.4361  7.6324   1
  -6  33  -1 26.4869  8.4589   1
   5 -34  -1 2.47681 5.55771   1
  -5 -34   1 -3.0448  4.6933   1
   5  34  -1 -4.2314  5.1402   1
  -5  34   1 -2.7757  5.3311   1
   4 -34  -1 8.24155 6.05346   1
  -4 -34   1 6.63025 5.63969   1
   4  34  -1 4.99861 5.38165   1
  -4  34   1 -6.0625  4.5053   1
   3 -34  -1 22.9053  6.8913   1
  -3 -34   1 27.9615  7.8569   1
  -3  34   1 9.72013 6.10031   1
   3  34  -1 18.5932  7.4647   1
   2 -34  -1 83.1828 12.0287   1
  -2 -34   1 85.5043 12.2024   1
  -2  34   1 60.5198 11.0784   1
   2  34  -1 66.8099 11.5714   1
  -1 -34   1 34.1406  8.3815   1
   1 -34  -1 35.2421  8.2982   1
   1  34  -1 56.7107 10.5990   1
  -1  34   1 25.0975  7.6644   1
   0 -34   1 16.6234  6.7312   1
   0 -34  -1 18.6701  6.6494   1
   0  34   1 25.5939  8.1975   1
   0  34  -1 35.5954  8.7309   1
   1 -34   1 33.8247  8.3799   1
  -1 -34  -1 15.9702  6.4576   1
   1  34   1 27.0659  7.6104   1
  -1  34  -1 30.6910  8.5309   1
   2 -34   1 53.7681  9.8483   1
  -2 -34  -1 36.0741  8.5020   1
  -2  34  -1 48.7157 10.3379   1
   2  34   1 46.8735 10.1018   1
   3 -34   1 51.1020 10.0132   1
  -3 -34  -1 40.8088  8.8056   1
  -3  34  -1 38.2868  9.5037   1
   3  34   1 39.7322  9.7775   1
   4 -34   1 0.91329 5.23060   1
  -4 -34  -1 6.41062 5.17429   1
   4  34   1 1.84669 5.58238   1
  -4  34  -1 8.50227 5.92560   1
  -5 -34  -1 9.50793 6.22512   1
   5 -34   1 3.24044 5.87779   1
  -5 -34  -1 2.68841 5.32962   1
  -5  34  -1 5.73523 6.87220   1
   5  34   1 1.59837 5.73933   1
  -5  35   1 -0.6860  6.0005   1
   4 -35  -1 6.44367 5.65145   1
  -4 -35   1 9.96409 6.30939   1
   4  35  -1 11.2438  6.9751   1
  -4  35   1 8.47440 6.89330   1
   3 -35  -1 2.93389 5.14418   1
  -3 -35   1 -5.4814  4.8264   1
  -3  35   1 0.04641 4.88298   1
   3  35  -1 2.02532 5.57620   1
   2 -35  -1 36.6208  8.6525   1
  -2 -35   1 47.2368  9.6429   1
   2  35  -1 22.6692  7.8870   1
  -2  35   1 45.1565 10.2514   1
  -1 -35   1 15.9803  6.7563   1
   1 -35  -1 10.0197  6.4575   1
   1  35  -1 13.8944  6.7138   1
  -1  35   1 4.93060 5.81241   1
   0 -35   1 10.2587  5.9496   1
   0 -35  -1 13.9926  6.6883   1
   0  35  -1 13.5170  7.1411   1
   0  35   1 13.8255  7.0475   1
   1 -35   1 19.7984  7.5799   1
  -1 -35  -1 8.56703 5.55621   1
   1  35   1 21.0413  8.2113   1
  -1  35  -1 35.4077  8.9062   1
   2 -35   1 42.5178  9.4859   1
  -2 -35  -1 55.6693 10.2349   1
   2  35   1 62.2938 11.2301   1
  -2  35  -1 56.5854 10.6494   1
   3 -35   1 0.22158 4.61481   1
  -3 -35  -1 2.85846 5.24871   1
  -3  35  -1 3.26678 5.66809   1
   3  35   1 1.69694 5.52915   1
   4 -35   1 36.2060  9.0113   1
  -4 -35  -1 34.1811  8.9354   1
   4  35   1 44.4020 10.0855   1
  -4  35  -1 62.6926 11.4866   1
   3 -36  -1 9.06328 6.00976   1
  -3 -36   1 18.0370  7.1305   1
  -3  36   1 18.5914  7.4706   1
   3  36  -1 22.1599  7.9515   1
  -2 -36   1 77.1661 11.9089   1
   2 -36  -1 71.7098 11.2718   1
  -2  36   1 61.0142 12.0098   1
   2  36  -1 66.7762 11.7972   1
  -1 -36   1 72.1833 11.5226   1
   1 -36  -1 62.0917 10.8146   1
   1  36  -1 46.3111 10.3601   1
  -1  36   1 42.5295 10.1487   1
   0 -36   1 65.3833 11.0152   1
   0 -36  -1 43.8334  9.8767   1
   0  36  -1 52.5311 10.9371   1
   0  36   1 59.2788 11.3832   1
   1 -36   1 26.5034  7.9258   1
  -1 -36  -1 16.9719  7.2069   1
   1  36   1 22.3963  7.5790   1
  -1  36  -1 31.4249  9.2526   1
   2 -36   1 2.09554 5.62401   1
  -2 -36  -1 2.04227 5.21262   1
  -2  36  -1 6.91966 6.53820   1
   2  36   1 0.19453 5.73338   1
  -3 -36  -1 43.6289  9.0059   1
   3 -36   1 37.7117  9.5310   1
   3  36   1 51.9653 10.7451   1
  -3  36  -1 37.9842  9.6644   1
  -1 -37   1 7.04532 5.92369   1
   1 -37  -1 -0.6352  5.0386   1
   1  37  -1 1.56793 6.11096   1
  -1  37   1 8.35721 6.54015   1
   0 -37   1 -1.1077  4.6209   1
   0 -37  -1 -0.0817  5.0440   1
   0  37  -1 3.36874 6.36562   1
   0  37   1 6.92285 6.35019   1
  -1 -37  -1 2.51493 5.40413   1
   1 -37   1 7.87110 6.49428   1
  -1  37  -1 5.38023 6.50163   1
   1  37   1 1.02507 5.91736   1
 -14   0   2 0.69199 5.68677   1
 -13   0   2 57.3123 10.3707   1
 -12   0   2 15.7790  6.1996   1
  11   0  -2 4.97241 5.15599   1
 -11   0   2 6.37203 4.75013   1
 -10   0   2 27.5655  6.3885   1
  10   0  -2 31.5749  6.6214   1
  10   0  -2 45.8554  6.5973   3
  -9   0   2 39.6398  6.9958   1
   9   0  -2 40.9330  6.4956   1
   9   0  -2 43.5680  6.1453   3
  -8   0   2 323.045  15.977   1
   8   0  -2 316.078  15.610   1
   8   0  -2 314.158  15.046   3
  -7   0   2 37.8917  5.6680   1
   7   0  -2 27.6613  4.8118   1
   7   0  -2 34.3435  5.2062   3
   6   0  -2 321.353  14.810   3
   6   0  -2 362.329  15.304   1
  -6   0   2 366.821  15.490   1
   5   0  -2 819.388  28.715   3
   5   0  -2 781.805  27.939   1
  -5   0   2 832.902  28.351   1
   4   0  -2 279.098  11.798   3
   4   0  -2 261.437  11.029   1
  -4   0   2 281.744  11.272   1
   3   0  -2 109.574   6.419   3
   3   0  -2 110.934   5.431   1
  -3   0   2 109.107   5.455   1
   2   0  -2 1564.52   48.68   2
   2   0  -2 1544.65   49.79   3
  -2   0   2 1573.73   47.64   1
   1   0  -2 142.959   5.578   2
   1   0  -2 113.161   5.456   3
   0   0  -2 0.90550 0.76616   4
  -1   0  -2 7.15159 1.49158   2
  -1   0  -2 12.4188  1.6536   1
  -1   0  -2 14.4924  1.2819   3
   1   0   2 7.58439 1.52552   1
   2   0   2 16.3217  2.7639   1
  -2   0  -2 18.1054  2.5941   1
  -2   0  -2 22.9528  2.4771   2
  -3   0  -2 2.25544 2.04350   1
   3   0   2 0.77070 2.04105   1
   4   0   2 5006.36  155.06   3
   4   0   2 5126.26  155.36   1
  -4   0  -2 5104.74  154.93   1
   5   0   2 101.417   4.583   3
  -5   0  -2 114.586   7.480   1
   5   0   2 106.261   7.673   1
  -6   0  -2 253.680  13.296   1
   6   0   2 270.895   9.887   3
   6   0   2 268.794  13.653   1
   7   0   2 10.6323  4.4180   1
  -7   0  -2 6.10050 3.60819   1
   7   0   2 2.79059 1.97103   3
  -8   0  -2 4.88218 4.03034   1
   8   0   2 12.7565  4.7545   1
  -9   0  -2 149.120  11.473   1
   9   0   2 154.014  12.347   1
 -10   0  -2 40.7696  7.4799   1
  10   0   2 39.4482  7.6325   1
  11   0   2 1.51505 4.64613   1
 -11   0  -2 5.04662 4.40174   1
 -12   0  -2 2.20416 4.36253   1
  12   0   2 0.24633 4.26921   1
 -13   0  -2 30.7303  8.3220   1
  13   0   2 8.81846 6.12048   1
  14   0   2 68.5448 11.8977   1
 -14   0  -2 69.4622 12.1684   1
 -14  -1   2 7.15301 6.37340   1
 -14   1   2 2.95581 5.68769   1
 -13  -1   2 40.8058  8.6296   1
 -13   1   2 12.3319  6.4191   1
 -12  -1   2 6.36025 5.03406   1
 -12   1   2 14.0250  5.9850   1
 -11  -1   2 3.51507 3.96916   1
  11  -1  -2 9.25583 4.90827   1
  11   1  -2 -1.0147  4.2283   1
 -11   1   2 -1.8851  3.7427   1
 -10  -1   2 -0.7310  3.7604   1
  10  -1  -2 -1.1382  3.5785   1
  10  -1  -2 3.03331 3.83122   3
 -10   1   2 1.18945 4.15576   1
  10   1  -2 -5.4474  3.2392   1
  10   1  -2 0.49239 3.51199   3
   9  -1  -2 46.0881  6.2336   3
  -9  -1   2 56.6533  7.9289   1
   9  -1  -2 59.3117  7.6437   1
   9   1  -2 56.2714  6.9249   3
   9   1  -2 63.1841  7.8343   1
  -9   1   2 48.2428  7.3183   1
   8  -1  -2 57.0527  7.1805   1
   8  -1  -2 44.6124  6.0295   3
  -8  -1   2 34.4782  6.0917   1
   8   1  -2 50.3454  6.4025   3
   8   1  -2 35.7692  5.9384   1
  -8   1   2 43.2638  6.5104   1
   7  -1  -2 109.910   7.944   1
   7  -1  -2 96.8834  7.4448   3
  -7  -1   2 76.9521  7.8896   1
  -7   1   2 99.3111  7.9246   1
   7   1  -2 81.8223  7.5184   3
   7   1  -2 70.1559  7.3848   1
   6  -1  -2 1.50104 2.48239   1
   6  -1  -2 0.69148 2.46787   3
  -6  -1   2 1.59026 2.65803   1
   6   1  -2 3.44024 2.87746   3
   6   1  -2 1.82646 2.61023   1
  -6   1   2 3.36608 2.85721   1
   5  -1  -2 74.5549  6.1423   3
  -5  -1   2 80.6477  5.9555   1
   5  -1  -2 72.1756  5.6125   1
   5   1  -2 73.8035  5.9127   1
  -5   1   2 79.0648  5.9226   1
   5   1  -2 75.5611  6.0973   3
   4  -1  -2 268.876  11.617   3
  -4  -1   2 280.348  11.321   1
   4  -1  -2 253.472  10.990   1
  -4   1   2 262.808  11.196   1
   4   1  -2 295.079  12.125   3
   4   1  -2 284.002  11.344   1
  -3  -1   2 1396.04   43.60   1
   3  -1  -2 1377.47   45.05   3
   3  -1  -2 1370.99   43.36   1
   3   1  -2 1406.69   45.21   3
  -3   1   2 1395.18   43.50   1
   3   1  -2 1385.25   43.42   1
  -2  -1   2 9999.99  282.80   1
  -2  -1   2 9528.53  282.36   1
   2  -1  -2 9778.24  281.51   2
   2  -1  -2 9686.78  286.60   3
   2  -1  -2 8073.79  279.71   1
  -2   1   2 8925.62  281.00   1
   2   1  -2 8920.80  278.63   1
   2   1  -2 9684.54  290.38   5
   2   1  -2 9614.57  286.64   3
  -1   1   2 80.5948  4.7132   4
   1   1  -2 100.422   4.519   2
   1   1  -2 94.9235  4.5713   3
   1   1  -2 67.8145  4.4645   4
   0  -1   2 0.70380 0.93883   4
   0  -1   2 -0.4053  0.3494   1
   0  -1   2 -0.3048  0.4052   1
   0  -1  -2 -1.5682  0.6367   4
   0   1   2 -0.8597  0.3274   1
   0   1   2 4.03954 1.19894   4
   0   1  -2 0.83326 0.87592   2
   0   1   2 -0.5214  0.3257   1
  -1  -1  -2 1142.17   42.01   2
  -1  -1  -2 1417.91   41.54   1
  -1   1  -2 1420.21   41.87   3
  -1   1  -2 1430.01   41.58   1
   2  -1   2 1105.12   35.89   1
  -2  -1  -2 1124.48   35.64   1
   2   1   2 1096.70   35.85   1
  -2   1  -2 1138.29   35.16   2
  -2   1  -2 1152.87   35.73   1
  -3  -1  -2 91.4633  5.6876   1
   3  -1   2 103.203   6.219   1
  -3   1  -2 110.135   4.834   2
   3   1   2 96.7370  6.1280   1
  -3   1  -2 93.0931  5.7695   1
   3   1   2 101.235   3.992   3
  -4  -1  -2 62.8489  5.3908   1
   4  -1   2 70.9569  6.3889   1
   4   1   2 81.1441  6.4561   1
   4   1   2 81.0283  3.7084   3
  -4   1  -2 62.7278  5.9290   1
  -5  -1  -2 346.226  15.130   1
   5  -1   2 362.769  15.916   1
  -5   1  -2 352.984  15.333   1
   5   1   2 356.011  12.419   3
   5   1   2 370.018  15.909   1
   6  -1   2 56.4861  6.7403   1
  -6  -1  -2 71.6415  7.4302   1
  -6   1  -2 74.3603  7.2500   1
   6   1   2 61.3989  6.9983   1
   6   1   2 61.7015  4.0859   3
  -7  -1  -2 3.39506 3.38428   1
   7  -1   2 5.08042 3.63449   1
   7   1   2 5.82572 2.09290   3
   7   1   2 -2.6425  3.4347   1
  -7   1  -2 0.16753 2.82195   1
  -8  -1  -2 4.08381 3.72595   1
   8  -1   2 4.68400 4.32570   1
  -8   1  -2 6.50986 2.51830   2
  -8   1  -2 7.42794 4.20788   1
   8   1   2 4.29243 4.02651   1
   8   1   2 6.48661 2.35926   3
  -9  -1  -2 7.07843 4.29679   1
   9  -1   2 -1.6932  3.9822   1
  -9   1  -2 -0.5478  3.3566   1
   9   1   2 -4.7611  3.2406   1
 -10  -1  -2 45.2803  8.2831   1
  10  -1   2 49.6415  8.7415   1
 -10   1  -2 52.1728  8.1162   1
  10   1   2 59.1585  9.2008   1
 -11  -1  -2 85.7712 11.2271   1
  11  -1   2 102.163  12.167   1
 -11   1  -2 72.6512 10.5493   1
  11   1   2 102.588  12.358   1
 -12  -1  -2 9.96701 5.88015   1
  12  -1   2 30.8534  7.9798   1
  12   1   2 4.60503 5.27772   1
 -12   1  -2 11.7835  6.0441   1
 -13  -1  -2 20.9639  7.2300   1
  13  -1   2 19.5759  7.1680   1
 -13   1  -2 25.7666  7.9411   1
  13   1   2 24.2177  7.8491   1
 -14  -1  -2 0.61714 5.30261   1
 -14   1  -2 8.05812 6.52153   1
 -14  -2   2 69.7399 12.0585   1
 -14   2   2 82.9591 13.0873   1
 -13  -2   2 32.2191  8.3050   1
 -13   2   2 51.2019  9.6527   1
 -12  -2   2 5.67622 4.88889   1
 -12   2   2 -0.6484  4.3477   1
  11  -2  -2 68.7615  9.4434   1
 -11  -2   2 75.7487 10.2606   1
  11   2  -2 82.0436 10.2877   1
 -11   2   2 58.7056  9.2498   1
 -10  -2   2 125.796  12.259   1
  10  -2  -2 126.596   9.515   3
  10  -2  -2 120.192  11.454   1
 -10   2   2 123.054  12.604   1
  10   2  -2 134.401   9.851   3
  10   2  -2 148.319  11.236   1
  -9  -2   2 103.166  10.716   1
   9  -2  -2 124.875   8.931   3
   9  -2  -2 126.394  10.314   1
   9   2  -2 138.839   9.811   3
   9   2  -2 113.447  10.575   1
  -9   2   2 114.971  11.156   1
  -8  -2   2 66.1298  8.0231   1
   8  -2  -2 71.7166  7.3112   3
   8  -2  -2 74.2170  8.0624   1
  -8   2   2 63.3530  7.8389   1
   8   2  -2 67.6311  7.7100   1
   8   2  -2 72.7166  7.4972   3
  -7  -2   2 109.231   8.304   1
   7  -2  -2 130.075   8.234   3
   7  -2  -2 124.641   8.839   1
   7   2  -2 125.627   8.500   3
   7   2  -2 100.693   8.190   1
  -7   2   2 118.533   8.814   1
   6  -2  -2 124.893   7.840   3
  -6  -2   2 130.670   8.191   1
   6  -2  -2 111.734   7.639   1
   6   2  -2 107.605   7.973   3
   6   2  -2 111.566   7.709   1
  -6   2   2 110.231   7.827   1
   5  -2  -2 186.357   9.198   1
   5  -2  -2 179.988   9.363   3
  -5  -2   2 176.325   9.180   1
   5   2  -2 184.849   9.595   3
   5   2  -2 188.223   9.272   1
  -5   2   2 176.404   9.166   1
  -4  -2   2 448.615  16.663   1
   4  -2  -2 452.008  16.481   1
   4  -2  -2 451.132  17.138   3
   4   2  -2 456.531  16.524   1
   4   2  -2 442.160  17.205   3
  -4   2   2 447.684  16.483   1
   3  -2  -2 434.211  16.325   3
  -3  -2   2 449.084  15.556   1
   3  -2  -2 456.474  15.307   2
   3  -2  -2 432.054  15.313   1
   3   2  -2 448.248  15.516   1
   3   2  -2 425.603  16.360   3
  -3   2   2 440.806  15.498   1
   2  -2  -2 622.493  19.563   1
   2  -2  -2 630.654  20.317   2
   2  -2  -2 622.145  21.279   3
  -2  -2   2 590.544  19.747   1
   2   2  -2 598.900  21.329   5
  -2   2   2 626.341  19.763   1
   2   2  -2 619.699  21.313   3
   2   2  -2 610.652  19.717   1
   1  -2  -2 482.025  16.773   3
   1  -2  -2 521.040  15.775   5
   1  -2  -2 492.298  16.398   2
   1   2  -2 491.133  16.864   5
   1   2  -2 460.689  17.625   4
  -1   2   2 486.913  17.664   4
   1   2  -2 469.911  16.706   3
   1  -2   2 2597.53   80.44   1
  -1  -2  -2 2754.81   80.27   1
   1   2   2 2592.05   80.42   1
  -1   2  -2 2381.07   80.72   2
  -1   2  -2 2953.13   80.45   1
   2  -2   2 101.012   5.620   1
  -2  -2  -2 105.141   5.509   1
  -2   2  -2 105.034   4.630   2
  -2   2  -2 98.7481  5.3234   1
   2   2   2 107.190   5.929   1
  -3  -2  -2 108.291   5.987   1
   3  -2   2 97.6044  6.1214   1
  -3   2  -2 92.6009  6.0202   1
   3   2   2 110.163   6.423   1
  -3   2  -2 99.2749  4.5489   2
  -4  -2  -2 237.095  10.905   1
   4  -2   2 222.259  10.963   1
  -4   2  -2 222.123  10.829   1
  -4   2  -2 231.758   8.548   2
   4   2   2 225.573  10.992   1
   4   2   2 243.256   8.668   3
   5  -2   2 45.8174  5.7832   1
  -5  -2  -2 58.1350  5.8532   1
   5   2   2 56.9990  3.7741   3
  -5   2  -2 52.2857  5.9732   1
   5   2   2 56.7379  6.1342   1
  -5   2  -2 47.0492  3.2777   2
  -6  -2  -2 -0.3568  2.5266   1
   6  -2   2 6.62398 3.25162   1
   6   2   2 2.11868 3.00818   1
  -6   2  -2 0.48602 1.50352   2
   6   2   2 -0.5530  1.7230   3
  -6   2  -2 2.66057 2.95758   1
   7  -2   2 -4.8612  2.5698   1
  -7  -2  -2 0.82327 3.14377   1
  -7   2  -2 2.08869 3.01234   1
   7   2   2 1.19887 1.85984   3
  -7   2  -2 0.78960 1.75107   2
   7   2   2 2.14279 3.77447   1
  -8  -2  -2 203.351  13.079   1
   8  -2   2 233.747  13.898   1
   8   2   2 217.817   9.440   3
  -8   2  -2 221.289  13.357   1
  -8   2  -2 215.946   8.696   2
   8   2   2 206.314  13.796   1
   9  -2   2 32.7407  6.9773   1
  -9  -2  -2 36.2937  6.6035   1
   9   2   2 33.0343  6.9677   1
  -9   2  -2 38.4314  6.9918   1
 -10  -2  -2 81.5058 10.5808   1
  10  -2   2 83.0397 10.6402   1
 -10   2  -2 108.507  11.658   1
  10   2   2 107.870  12.156   1
  11  -2   2 4.97903 4.80552   1
 -11  -2  -2 1.70091 4.54076   1
  11   2   2 -0.8670  4.1509   1
 -11   2  -2 -0.5543  4.2982   1
  12  -2   2 10.1092  5.6957   1
 -12  -2  -2 1.84204 4.74066   1
 -12   2  -2 4.97205 5.24101   1
  12   2   2 4.31504 5.21524   1
 -13  -2  -2 8.90903 5.57937   1
  13  -2   2 22.2887  7.2417   1
 -13   2  -2 5.23735 5.70242   1
  13   2   2 -0.0244  5.4028   1
 -14  -2  -2 2.24843 5.26801   1
 -14   2  -2 2.82659 5.88502   1
 -14  -3   2 -1.8510  5.1960   1
 -14   3   2 10.2733  6.4617   1
 -13  -3   2 3.60167 5.32178   1
 -13   3   2 9.36532 5.96597   1
 -12  -3   2 24.4273  6.8600   1
 -12   3   2 13.4023  6.0434   1
  11  -3  -2 8.56455 5.19930   1
 -11  -3   2 9.59248 5.02390   1
 -11   3   2 13.3552  5.4227   1
  11   3  -2 -1.8658  4.6574   1
  11   3  -2 4.74633 4.46148   3
  10  -3  -2 -6.2300  3.2481   1
 -10  -3   2 -2.8001  3.3745   1
  10  -3  -2 2.55164 3.66927   3
 -10   3   2 -2.5607  3.8000   1
  10   3  -2 -0.2083  4.1448   1
  10   3  -2 -3.2207  3.4102   3
  -9  -3   2 8.87155 4.54520   1
   9  -3  -2 8.93003 4.26684   1
   9  -3  -2 10.7267  4.1383   3
  -9   3   2 8.26173 4.63727   1
   9   3  -2 4.33363 4.03689   1
   9   3  -2 7.29173 4.05153   3
  -8  -3   2 41.9067  6.4709   1
   8  -3  -2 49.9167  6.1832   3
   8  -3  -2 37.3949  6.0317   1
   8   3  -2 36.8799  6.0656   1
   8   3  -2 44.5136  6.2559   3
  -8   3   2 43.4268  6.7230   1
   7  -3  -2 18.1117  4.1968   1
   7  -3  -2 5.06643 3.32170   3
  -7  -3   2 17.2042  4.4073   1
   7   3  -2 19.1307  4.2900   1
  -7   3   2 16.1908  4.4828   1
   7   3  -2 9.90923 3.95565   3
  -6  -3   2 14.4119  3.6268   1
   6  -3  -2 13.3066  3.4784   1
   6  -3  -2 14.5334  3.5737   3
   6   3  -2 12.0324  3.5285   3
   6   3  -2 11.9354  3.5265   1
  -6   3   2 15.2087  3.7240   1
   5  -3  -2 12.0571  2.9885   1
  -5  -3   2 13.6677  3.3179   1
   5  -3  -2 13.7568  3.3040   3
   5   3  -2 12.0575  3.2409   3
  -5   3   2 17.3395  3.4258   1
   5   3  -2 12.3567  3.0793   1
  -4  -3   2 1.07186 1.85732   1
   4  -3  -2 -0.3686  2.0591   3
   4  -3  -2 5.63260 2.15227   1
  -4   3   2 2.50336 1.91001   1
   4   3  -2 -1.5073  2.0523   3
   4   3  -2 3.97173 2.25955   1
  -3  -3   2 165.970   7.258   1
  -3  -3   2 157.522   7.182   1
   3  -3  -2 163.389   6.743   2
   3  -3  -2 156.289   7.017   1
   3  -3  -2 146.631   7.780   3
   3   3  -2 153.694   7.167   1
  -3   3   2 169.331   7.338   1
   3   3  -2 161.457   8.051   5
   3   3  -2 155.863   8.159   3
  -2  -3   2 245.071   9.191   1
   2  -3  -2 233.293  10.119   3
   2  -3  -2 252.643   9.453   2
  -2  -3   2 255.475  10.312   5
   2  -3  -2 243.921   8.959   1
   2   3  -2 257.317  10.372   3
  -2   3   2 250.923   9.187   1
   2   3  -2 243.713  10.294   5
   2   3  -2 269.127   9.254   1
   1  -3  -2 50.7557  3.6616   3
  -1  -3   2 45.7873  3.2447   5
  -1  -3   2 43.1007  2.6172   1
  -1  -3   2 43.1235  3.5915   4
   1  -3  -2 48.2802  3.3474   2
   1  -3  -2 49.3030  1.9785   5
   1   3  -2 49.6695  3.7297   4
  -1   3   2 44.6975  3.5977   4
   1   3  -2 45.8513  3.4945   3
  -1   3   2 45.9760  2.6161   1
   0  -3  -2 409.312  13.553   1
   0  -3  -2 392.807  13.494   1
   0   3  -2 415.659  15.512   4
   0   3  -2 463.666  13.846   1
   0   3   2 450.960  15.393   4
   1  -3   2 3218.52   95.89   1
  -1  -3  -2 3139.72   95.61   1
   1   3   2 3132.45   95.76   1
  -1   3  -2 3139.16   96.19   2
  -1   3  -2 3194.69   95.70   1
  -2  -3  -2 1291.50   41.35   1
   2  -3   2 1296.61   41.62   1
  -2   3  -2 1312.53   40.48   2
  -2   3  -2 1321.06   41.43   1
   2   3   2 1327.52   41.66   1
  -3  -3  -2 126.864   6.817   1
   3  -3   2 121.699   7.048   1
  -3   3  -2 121.739   4.976   2
   3   3   2 132.554   7.317   1
  -3   3  -2 113.718   6.773   1
  -4  -3  -2 168.392   9.095   1
   4  -3   2 198.918   9.651   1
  -4   3  -2 171.873   9.110   1
   4   3   2 172.707   9.590   1
  -4   3  -2 182.409   6.693   2
  -5  -3  -2 23.2092  4.1669   1
   5  -3   2 16.6629  3.7814   1
   5   3   2 7.23872 3.14695   1
  -5   3  -2 19.5065  2.0716   2
  -5   3  -2 23.4050  4.1649   1
   5   3   2 23.3083  2.8039   3
   6  -3   2 4.39966 3.08929   1
  -6  -3  -2 4.97313 3.23455   1
   6   3   2 8.22143 2.27781   3
   6   3   2 0.16399 3.40181   1
  -6   3  -2 4.14475 1.57489   2
  -6   3  -2 3.84301 3.14842   1
   7  -3   2 72.3028  8.1220   1
  -7  -3  -2 62.8034  7.3663   1
   7   3   2 65.3341  5.1248   3
   7   3   2 66.5763  8.0333   1
  -7   3  -2 73.4188  7.8363   1
   8  -3   2 48.9793  7.7455   1
  -8  -3  -2 50.1438  7.2213   1
   8   3   2 60.3864  5.1436   3
   8   3   2 79.3000  9.4606   1
  -8   3  -2 53.5614  7.6247   1
  -9  -3  -2 4.50615 4.21364   1
   9  -3   2 3.12876 4.56544   1
   9   3   2 11.6714  5.1736   1
  -9   3  -2 16.8694  5.2504   1
  10  -3   2 -4.5351  3.9831   1
 -10  -3  -2 7.41344 4.55396   1
 -10   3  -2 -0.7686  3.6935   1
  10   3   2 -1.4533  4.3455   1
  11  -3   2 6.60922 5.09241   1
 -11  -3  -2 10.5153  5.2737   1
 -11   3  -2 14.4319  6.0082   1
  11   3   2 5.14218 5.18160   1
 -12  -3  -2 5.49995 5.55746   1
  12  -3   2 0.45921 4.88150   1
  12   3   2 14.1069  6.2889   1
 -12   3  -2 3.44495 4.65230   1
 -13  -3  -2 -1.5350  4.7653   1
  13  -3   2 -0.3323  5.1318   1
 -13   3  -2 -1.1218  4.8369   1
  13   3   2 -4.4513  5.0846   1
 -14  -4   2 2.42408 5.49291   1
 -14   4   2 -5.4581  4.8464   1
 -13  -4   2 3.05339 5.15455   1
 -13   4   2 5.11729 5.68131   1
 -12  -4   2 25.1812  7.5333   1
 -12   4   2 35.0961  8.0190   1
 -11  -4   2 40.8866  7.7141   1
  11  -4  -2 30.6941  6.9459   1
  11   4  -2 52.0418  7.6558   3
 -11   4   2 41.6160  7.9501   1
  11   4  -2 25.8934  6.9419   1
 -10  -4   2 -4.7450  2.9474   1
  10  -4  -2 -4.3193  3.6172   1
  10   4  -2 -2.6433  3.6504   3
 -10   4   2 0.33244 3.87450   1
  10   4  -2 5.52344 4.07691   1
   9  -4  -2 78.4088  8.1342   3
   9  -4  -2 88.0509  9.2041   1
  -9  -4   2 80.9501  9.5931   1
   9   4  -2 83.8181  8.6284   3
  -9   4   2 71.6829  8.9346   1
   9   4  -2 92.9788  9.4924   1
   8  -4  -2 178.041  10.893   1
  -8  -4   2 154.721  10.981   1
   8  -4  -2 146.193   9.719   3
   8   4  -2 152.516  10.609   1
   8   4  -2 146.144  10.177   3
  -8   4   2 151.754  10.922   1
   7  -4  -2 205.155  11.266   3
   7  -4  -2 204.484  11.416   1
  -7  -4   2 229.964  12.359   1
  -7   4   2 210.285  12.141   1
   7   4  -2 198.661  11.761   1
   7   4  -2 224.470  11.811   3
   6  -4  -2 168.602   9.201   1
  -6  -4   2 158.582   9.274   1
   6  -4  -2 147.865   8.807   3
  -6   4   2 133.878   8.969   1
   6   4  -2 147.069   9.195   3
   6   4  -2 149.077   9.008   1
  -5  -4   2 13.6675  3.2892   1
   5  -4  -2 18.4342  3.6250   3
   5  -4  -2 18.5173  3.4656   1
   5   4  -2 11.6558  3.2264   1
  -5   4   2 18.9038  3.5979   1
   5   4  -2 17.6053  3.7221   3
  -4  -4   2 183.195   8.734   1
   4  -4  -2 175.604   8.417   1
   4  -4  -2 180.175   7.395   2
   4  -4  -2 169.284   8.895   3
   4   4  -2 174.281   9.211   3
  -4   4   2 182.167   8.728   1
   4   4  -2 188.339   8.812   1
   3  -4  -2 251.142   9.466   2
   3  -4  -2 252.513   9.952   1
  -3  -4   2 246.180  10.041   1
   3  -4  -2 251.865  10.858   3
  -3   4   2 253.262  10.096   1
   3   4  -2 248.986  11.124   5
   3   4  -2 238.917  11.017   3
   3   4  -2 251.500  10.112   1
  -2  -4   2 2001.06   61.14   1
  -2  -4   2 2014.78   64.39   5
   2  -4  -2 2050.76   61.65   2
   2  -4  -2 2018.49   60.87   1
   2  -4  -2 1970.27   63.40   3
   2   4  -2 1979.17   63.45   3
   2   4  -2 1993.27   61.10   1
   2   4  -2 2082.59   64.51   5
  -2   4   2 1839.69   60.99   1
  -1  -4   2 556.513  19.976   4
   1  -4  -2 555.200  17.848   1
  -1  -4   2 563.367  18.143   1
   1  -4  -2 569.408  18.860   2
  -1  -4   2 543.870  19.545   5
   1   4  -2 557.380  20.089   4
   1   4  -2 564.518  19.672   5
  -1   4   2 553.525  18.067   1
   1   4  -2 563.229  18.087   1
  -1   4   2 565.136  19.993   4
   0  -4  -2 854.406  25.436   1
   0  -4   2 813.744  25.634   1
   0  -4   2 824.161  27.881   4
   0  -4  -2 836.419  27.501   4
   0   4  -2 676.149  25.307   1
   0   4   2 840.597  27.537   4
   0   4  -2 834.832  27.930   4
  -1  -4  -2 86.9954  5.1286   4
   1  -4   2 87.0321  4.8016   1
  -1  -4  -2 81.4565  4.4556   1
   1   4   2 88.5637  4.6413   1
  -1   4  -2 90.2190  4.7225   1
  -2  -4  -2 356.185  12.922   1
   2  -4   2 336.687  13.024   1
  -2   4  -2 344.615  12.953   1
   2   4   2 343.118  13.117   1
  -2   4  -2 336.493  11.666   2
  -3  -4  -2 461.460  16.856   1
   3  -4   2 457.697  17.112   1
  -3   4  -2 432.346  16.764   1
   3   4   2 434.061  16.969   1
  -3   4  -2 460.847  14.627   2
   4  -4   2 15.4415  3.4373   1
  -4  -4  -2 12.6830  3.0702   1
  -4   4  -2 6.47354 2.81372   1
  -4   4  -2 13.3275  1.4744   2
   4   4   2 13.0800  3.3385   1
   5  -4   2 -1.2559  2.3660   1
  -5  -4  -2 2.12870 2.56989   1
   5   4   2 2.73685 1.87803   3
  -5   4  -2 2.48863 2.68923   1
   5   4   2 -4.4793  2.4183   1
   6  -4   2 855.908  31.903   1
  -6  -4  -2 853.959  31.572   1
   6   4   2 873.860  32.190   1
  -6   4  -2 826.900  31.444   1
   6   4   2 858.364  28.856   3
   7  -4   2 15.8846  4.7680   1
  -7  -4  -2 5.09834 3.54767   1
   7   4   2 2.07983 2.43895   3
  -7   4  -2 6.83456 3.57088   1
   7   4   2 4.38056 4.22144   1
   8  -4   2 85.9591  9.6992   1
  -8  -4  -2 110.638  10.476   1
  -8   4  -2 91.2123  9.8986   1
   8   4   2 97.8116  6.6386   3
   8   4   2 126.984  11.714   1
   9  -4   2 2.84574 4.49441   1
  -9  -4  -2 4.14473 3.80286   1
  -9   4  -2 13.3894  4.7594   1
   9   4   2 12.6760  5.0226   1
 -10  -4  -2 2.80144 4.19390   1
  10  -4   2 5.92837 4.68691   1
  10   4   2 0.65419 4.52925   1
 -10   4  -2 0.74012 3.79723   1
 -11  -4  -2 73.3503 10.7046   1
  11  -4   2 100.671  12.284   1
  11   4   2 87.3786 11.4054   1
 -11   4  -2 109.928  12.460   1
  12  -4   2 10.3385  5.2619   1
 -12  -4  -2 12.3374  6.5182   1
  12   4   2 4.64798 5.21275   1
 -12   4  -2 6.33988 5.45136   1
 -13  -4  -2 14.4320  7.0301   1
  13  -4   2 26.9495  8.0020   1
  13   4   2 7.99076 6.48029   1
 -13   4  -2 20.6990  7.0751   1
 -14  -5   2 3.49402 5.74456   1
 -14   5   2 6.48598 6.20963   1
 -13  -5   2 14.7914  6.7794   1
 -13   5   2 15.5213  6.9420   1
 -12  -5   2 46.9073  8.7398   1
 -12   5   2 37.9816  8.4017   1
 -11  -5   2 -1.1346  3.5433   1
  11  -5  -2 1.96818 4.23747   1
  11   5  -2 1.21601 4.65570   1
  11   5  -2 -1.3042  3.9640   3
 -11   5   2 5.33856 4.78493   1
 -10  -5   2 1.09381 3.79512   1
  10  -5  -2 0.65347 3.80164   1
  10   5  -2 -2.1834  3.5479   3
 -10   5   2 -0.7662  3.7947   1
  10   5  -2 -3.7078  3.3286   1
  -9  -5   2 4.73879 3.88184   1
   9  -5  -2 11.6636  4.2335   1
  -9   5   2 0.48940 3.72009   1
   9   5  -2 9.42809 4.13404   3
   9   5  -2 3.42572 4.01625   1
   8  -5  -2 41.5603  6.4220   1
  -8  -5   2 43.5522  6.9900   1
  -8   5   2 55.0568  7.1720   1
   8   5  -2 43.4695  6.4971   3
   8   5  -2 49.3850  6.9509   1
   7  -5  -2 66.1949  7.1237   1
   7  -5  -2 51.3814  6.1904   3
  -7  -5   2 57.3771  6.7173   1
  -7   5   2 76.9510  7.7780   1
   7   5  -2 61.7834  6.9096   3
   7   5  -2 57.8767  6.9413   1
  -6  -5   2 68.6140  6.8484   1
   6  -5  -2 64.5734  6.4734   3
   6  -5  -2 72.8328  6.8361   1
  -6   5   2 74.1756  7.0438   1
   6   5  -2 74.7975  7.1483   1
   6   5  -2 66.8011  6.7078   3
   5  -5  -2 8.15134 2.94382   3
   5  -5  -2 3.72219 2.54257   1
  -5  -5   2 3.89869 2.29149   1
  -5   5   2 0.68967 2.19725   1
   5   5  -2 5.97614 2.72157   1
   5   5  -2 1.32149 2.48869   3
  -4  -5   2 -0.1234  1.6842   1
   4  -5  -2 8.15427 1.80923   2
   4  -5  -2 8.15997 2.72144   3
   4  -5  -2 5.04978 2.20962   1
   4   5  -2 6.73116 2.48337   1
   4   5  -2 0.13962 2.35829   3
  -4   5   2 4.71576 2.40558   1
   4   5  -2 6.16520 2.38401   5
  -3  -5   2 773.356  26.765   1
   3  -5  -2 831.032  26.196   2
   3  -5  -2 814.621  26.598   1
   3   5  -2 784.509  26.758   1
   3   5  -2 787.380  27.987   3
   3   5  -2 804.047  28.756   5
  -3   5   2 846.973  26.988   1
   2  -5  -2 684.413  22.436   2
  -2  -5   2 687.477  22.472   1
  -2  -5   2 669.449  24.026   5
   2  -5  -2 668.592  22.137   1
   2   5  -2 700.869  22.463   1
  -2   5   2 690.813  22.475   1
   2   5  -2 651.208  24.054   5
   1  -5  -2 608.846  19.895   1
  -1  -5   2 613.134  21.826   4
  -1  -5   2 626.442  21.649   5
  -1  -5   2 604.085  20.155   1
  -1   5   2 620.195  20.126   1
   1   5  -2 622.581  20.144   1
   1   5  -2 602.659  21.637   5
   1   5  -2 619.093  21.896   4
  -1   5   2 621.482  21.823   4
   0  -5  -2 3230.15  100.78   4
   0  -5  -2 3150.17   94.24   1
   0  -5   2 3099.57  101.21   4
   0  -5   2 3056.15   98.60   5
   0  -5   2 3090.22   94.45   1
   0   5  -2 3112.57  101.19   4
   0   5   2 3128.17  100.72   4
   0   5  -2 3091.08   94.41   1
  -1  -5  -2 563.003  18.611   1
  -1  -5  -2 550.401  19.722   4
   1  -5   2 555.269  18.938   1
  -1  -5  -2 564.914  18.631   1
  -1   5  -2 539.585  18.691   1
   1   5   2 546.012  18.803   1
  -2  -5  -2 652.601  22.187   1
   2  -5   2 650.364  22.419   1
   2   5   2 655.810  22.488   1
  -2   5  -2 647.903  22.210   1
  -3  -5  -2 297.540  12.420   1
   3  -5   2 313.203  12.878   1
  -3   5  -2 310.639  12.627   1
   3   5   2 295.129  12.844   1
  -4  -5  -2 554.802  21.052   1
   4  -5   2 553.228  21.303   1
   4   5   2 564.267  21.442   1
  -4   5  -2 571.780  21.275   1
  -5  -5  -2 235.968  11.612   1
   5  -5   2 235.152  11.888   1
  -5   5  -2 229.294  11.526   1
   5   5   2 193.275  11.555   1
  -6  -5  -2 30.1992  5.2500   1
   6  -5   2 22.6643  4.7364   1
   6   5   2 23.9347  3.5480   3
  -6   5  -2 16.9495  4.4310   1
   6   5   2 26.1395  5.1588   1
  -7  -5  -2 68.5915  8.0167   1
   7  -5   2 73.5633  8.5457   1
   7   5   2 76.4098  8.4241   1
  -7   5  -2 56.6716  7.3987   1
   7   5   2 69.5721  5.8109   3
  -8  -5  -2 13.5710  4.5699   1
   8  -5   2 0.52486 3.72259   1
  -8   5  -2 0.64512 3.49419   1
   8   5   2 7.76553 4.68677   1
   8   5   2 10.7935  3.2015   3
  -9  -5  -2 -2.6505  2.7538   1
   9  -5   2 -3.5326  3.3922   1
   9   5   2 1.57617 4.42102   1
  -9   5  -2 -1.0540  3.2008   1
  10  -5   2 2.76625 4.71006   1
 -10  -5  -2 13.9644  5.5263   1
  10   5   2 7.32271 5.25252   1
 -10   5  -2 10.1309  5.1398   1
 -11  -5  -2 60.9661 10.0874   1
  11  -5   2 71.7159 10.4986   1
  11   5   2 88.3779 11.7122   1
 -11   5  -2 70.7277 10.5675   1
  12  -5   2 1.26317 4.74011   1
 -12  -5  -2 1.96354 5.39968   1
 -12   5  -2 10.5808  6.0648   1
  12   5   2 9.44535 5.94901   1
 -13  -5  -2 3.43150 5.80582   1
  13  -5   2 1.54571 5.06349   1
  13   5   2 5.04852 5.84515   1
 -13   5  -2 -1.7867  4.7245   1
 -14  -6   2 0.55434 5.42548   1
 -14   6   2 7.35611 6.29266   1
 -13  -6   2 2.53252 5.26101   1
 -13   6   2 1.80851 4.86774   1
 -12  -6   2 8.75465 5.26975   1
 -12   6   2 -1.5187  4.4776   1
  11  -6  -2 20.5871  6.3217   1
 -11  -6   2 25.4691  6.8677   1
  11   6  -2 29.8419  6.4015   3
 -11   6   2 32.8652  7.4184   1
  11   6  -2 26.8715  6.6830   1
 -10  -6   2 107.361  11.331   1
  10  -6  -2 121.159  11.578   1
  10   6  -2 98.6356 10.7104   1
  10   6  -2 114.197  10.725   3
 -10   6   2 98.5538 11.1750   1
  -9  -6   2 -1.2357  3.2754   1
   9  -6  -2 4.56203 3.69145   1
  -9   6   2 2.30900 3.83128   1
   9   6  -2 5.94859 4.24908   3
   9   6  -2 1.65387 3.59540   1
  -8  -6   2 4.10833 3.74377   1
   8  -6  -2 4.19611 3.58376   1
   8   6  -2 6.23674 3.96720   3
  -8   6   2 9.50928 4.07597   1
   8   6  -2 2.73963 3.73377   1
   7  -6  -2 81.6843  7.9699   1
  -7  -6   2 84.3235  8.3412   1
   7   6  -2 97.4308  8.0686   1
  -7   6   2 82.7776  8.3825   1
   7   6  -2 80.5056  7.9353   3
   6  -6  -2 14.6589  3.8287   1
  -6  -6   2 23.0270  4.2695   1
  -6   6   2 10.5707  3.4005   1
   6   6  -2 18.2964  4.0389   1
   6   6  -2 19.2958  4.2943   3
   5  -6  -2 19.1036  2.3598   2
   5  -6  -2 17.0080  3.3513   1
  -5  -6   2 11.2111  3.3787   1
   5   6  -2 17.8465  3.7692   5
   5   6  -2 16.4676  3.6470   1
  -5   6   2 14.9543  3.6227   1
   5   6  -2 18.7264  3.7746   3
  -4  -6   2 231.228  10.463   1
   4  -6  -2 231.969  10.147   1
   4  -6  -2 233.391   8.839   2
  -4  -6   2 214.870  10.294   1
   4   6  -2 229.621  10.956   3
   4   6  -2 210.241  11.097   5
   4   6  -2 227.456  10.434   1
  -4   6   2 228.661  10.302   1
  -3  -6   2 120.476   6.669   1
   3  -6  -2 125.416   5.878   2
   3  -6  -2 120.838   6.326   1
   3   6  -2 118.842   6.563   1
  -3   6   2 127.243   6.683   1
   3   6  -2 122.195   7.231   5
   2  -6  -2 271.382  10.285   1
  -2  -6   2 275.540  11.564   5
   2  -6  -2 272.136  10.394   2
  -2  -6   2 282.945  10.753   1
   2   6  -2 262.612  10.561   1
   2   6  -2 257.428  11.501   5
  -2   6   2 264.114  10.532   1
   1  -6  -2 743.590  24.207   1
  -1  -6   2 772.809  26.128   5
  -1  -6   2 751.522  26.155   4
   1  -6  -2 722.189  23.699   5
  -1  -6   2 763.020  24.561   1
  -1   6   2 728.320  25.988   4
   1   6  -2 752.186  26.156   4
   1   6  -2 772.290  26.193   5
   1   6  -2 745.086  24.459   1
  -1   6   2 754.483  24.480   1
   0  -6  -2 518.361  17.731   4
   0  -6  -2 503.248  16.976   1
   0  -6   2 488.552  17.200   1
   0  -6   2 471.774  18.149   5
   0  -6   2 512.633  18.325   4
   0   6  -2 514.041  17.251   1
   0   6   2 499.968  17.225   1
   0   6   2 492.324  17.691   4
   0   6  -2 508.005  18.303   4
   0   6   2 520.674  16.654   5
   1  -6   2 104.238   5.956   1
  -1  -6  -2 105.640   5.654   1
  -1  -6  -2 122.438   5.865   4
  -1   6  -2 107.915   5.683   1
   1   6   2 100.471   5.624   1
   2  -6   2 40.4478  4.2903   1
  -2  -6  -2 55.9516  4.2437   1
   2   6   2 61.7703  4.9153   1
  -2   6  -2 57.8477  4.6467   1
   3  -6   2 3.17186 2.27034   1
  -3  -6  -2 1.64102 1.93581   1
  -3   6  -2 0.59749 1.90937   1
   3   6   2 -0.5748  2.1311   1
  -4  -6  -2 1248.98   41.70   1
   4  -6   2 1234.02   41.89   1
   4   6   2 1250.31   42.10   1
  -4   6  -2 1238.24   41.69   1
  -5  -6  -2 14.3968  3.6546   1
   5  -6   2 19.4174  4.1002   1
  -5   6  -2 14.0622  3.7623   1
   5   6   2 13.1321  3.6823   1
   6  -6   2 1.10599 3.00301   1
  -6  -6  -2 6.09797 3.13458   1
  -6   6  -2 -3.4617  2.5656   1
   6   6   2 -2.3803  3.0943   1
   6   6   2 2.94597 2.35973   3
   7  -6   2 309.880  16.294   1
  -7  -6  -2 298.746  15.646   1
   7   6   2 298.537  13.079   3
  -7   6  -2 294.204  15.495   1
   7   6   2 315.761  16.168   1
   8  -6   2 56.1905  7.9162   1
  -8  -6  -2 58.6347  8.0669   1
   8   6   2 66.2883  8.7364   1
   8   6   2 74.9291  6.3557   3
  -8   6  -2 57.7878  8.2587   1
   9  -6   2 62.2170  8.9063   1
  -9  -6  -2 74.6613  9.0849   1
  -9   6  -2 50.3199  8.0729   1
   9   6   2 65.5689  9.4101   1
 -10  -6  -2 17.3038  5.4315   1
  10  -6   2 10.7931  5.2954   1
 -10   6  -2 11.6813  5.1229   1
  10   6   2 11.0302  5.5792   1
  11  -6   2 46.3710  8.7448   1
 -11  -6  -2 60.9881  9.7618   1
 -11   6  -2 52.0265  9.2814   1
  11   6   2 48.6364  8.9727   1
  12  -6   2 2.37486 4.93586   1
 -12  -6  -2 3.05503 4.78485   1
  12   6   2 8.31331 5.86954   1
 -12   6  -2 3.84973 5.32469   1
  13  -6   2 6.85180 6.16762   1
 -13  -6  -2 -3.9697  4.2502   1
 -13   6  -2 -4.8035  3.7224   1
  13   6   2 6.65335 5.80222   1
 -14  -7   2 0.10886 4.79171   1
 -14   7   2 0.17656 5.18741   1
 -13  -7   2 3.16768 5.29549   1
 -13   7   2 9.19830 6.03769   1
 -12  -7   2 2.17370 4.73424   1
 -12   7   2 2.01708 4.84113   1
  11  -7  -2 13.2293  5.8017   1
 -11  -7   2 20.0703  6.2089   1
 -11   7   2 20.4721  6.4009   1
  11   7  -2 15.6566  5.7278   1
  11   7  -2 29.0701  6.5303   3
 -10  -7   2 -1.0267  3.3180   1
  10  -7  -2 3.12870 4.30232   1
  10   7  -2 -6.7716  3.7647   3
 -10   7   2 4.83684 4.30989   1
  10   7  -2 1.78447 3.91980   1
  -9  -7   2 99.8918 10.5558   1
   9  -7  -2 117.378  10.873   1
  -9   7   2 121.007  11.457   1
   9   7  -2 95.5355 10.0645   1
   9   7  -2 102.096  10.000   3
   8  -7  -2 29.0311  5.5791   1
  -8  -7   2 29.3157  5.7903   1
   8   7  -2 21.3982  5.5203   1
  -8   7   2 19.7358  5.2000   1
   8   7  -2 29.1087  5.6795   3
  -7  -7   2 117.911   9.044   1
   7  -7  -2 113.966   8.804   1
   7   7  -2 108.573   9.106   3
   7   7  -2 135.034   9.469   1
  -7   7   2 132.511   9.529   1
   6  -7  -2 1.54831 2.68281   1
  -6  -7   2 -1.6405  2.3264   1
   6   7  -2 -1.2639  2.7081   1
   6   7  -2 1.04773 3.04291   3
   6   7  -2 2.36487 2.57453   5
  -6   7   2 -5.8054  2.1707   1
   5  -7  -2 16.9862  3.5179   1
  -5  -7   2 22.6474  4.0684   1
   5  -7  -2 26.4089  2.6663   2
   5   7  -2 16.7831  3.5347   5
   5   7  -2 23.4729  4.0258   1
  -5   7   2 16.9046  3.8495   1
   5   7  -2 23.6302  4.2102   3
   4  -7  -2 54.3318  5.0252   1
  -4  -7   2 44.2988  4.7419   1
   4  -7  -2 45.4972  3.4149   2
  -4  -7   2 49.4024  4.8815   1
   4   7  -2 55.6577  5.6816   3
   4   7  -2 53.9222  5.1523   1
   4   7  -2 39.0723  4.8511   5
  -4   7   2 48.0772  5.0189   1
   3  -7  -2 26.1389  2.9555   2
   3  -7  -2 28.1842  3.3593   1
  -3  -7   2 22.5216  3.2277   1
  -3   7   2 27.5951  3.5879   1
   3   7  -2 21.9416  3.3559   1
   3   7  -2 19.0817  3.3081   5
   2  -7  -2 25.4061  2.9634   1
  -2  -7   2 22.2766  3.0130   1
  -2  -7   2 23.9610  3.3551   5
  -2  -7   2 23.9641  3.2705   4
  -2   7   2 23.6289  3.1414   1
   2   7  -2 21.4228  3.3578   5
   2   7  -2 20.8667  3.0216   1
   1  -7  -2 31.2878  1.8668   5
  -1  -7   2 19.6061  2.8909   5
  -1  -7   2 22.2611  2.8680   4
  -1  -7   2 22.8250  2.8803   1
   1  -7  -2 30.4775  3.0298   1
   1   7  -2 25.6015  3.0709   4
  -1   7   2 29.6203  3.2436   1
   1   7  -2 16.0907  2.7993   5
   1   7  -2 28.6623  3.1812   1
  -1   7   2 25.7994  2.9583   4
   0  -7  -2 418.884  14.703   1
   0  -7   2 423.690  15.863   5
   0  -7  -2 420.613  14.898   4
   0  -7   2 406.875  15.447   4
   0  -7   2 395.918  14.926   1
   0   7   2 413.608  14.903   1
   0   7   2 420.794  14.872   4
   0   7  -2 397.923  15.448   4
   0   7  -2 425.725  14.982   1
   0   7   2 426.848  14.171   5
  -1  -7  -2 39.5022  3.5712   4
   1  -7   2 49.2107  4.0322   1
  -1  -7  -2 46.9128  4.0641   1
  -1   7  -2 45.2192  4.0611   1
   1   7   2 37.5639  3.8402   1
   2  -7   2 83.7957  5.8930   1
  -2  -7  -2 85.2519  5.5515   1
  -2  -7  -2 83.4782  5.4635   1
  -2   7  -2 88.4259  5.5434   1
   2   7   2 84.1891  5.9163   1
   3  -7   2 1133.02   37.15   1
  -3  -7  -2 1077.32   36.73   1
   3   7   2 1080.45   36.99   1
  -3   7  -2 1121.88   36.97   1
  -4  -7  -2 73.6417  6.1484   1
   4  -7   2 85.0351  6.7590   1
  -4   7  -2 90.5318  6.7733   1
   4   7   2 83.6523  6.8818   1
   5  -7   2 48.1551  6.1872   1
  -5  -7  -2 50.2548  5.9359   1
   5   7   2 54.9943  6.4229   1
  -5   7  -2 53.2275  6.0410   1
  -6  -7  -2 30.8373  5.4872   1
   6  -7   2 24.5464  5.0767   1
   6   7   2 30.1516  5.3762   1
  -6   7  -2 28.8671  5.0884   1
   7  -7   2 131.000  10.346   1
  -7  -7  -2 105.836  10.003   1
   7   7   2 123.907   9.937   1
   7   7   2 118.480   7.641   3
  -7   7  -2 88.1714  9.3512   1
   8  -7   2 42.2514  7.2366   1
  -8  -7  -2 49.0325  7.2804   1
   8   7   2 40.8772  7.4435   1
   8   7   2 55.9428  5.8706   3
  -8   7  -2 63.5843  8.3002   1
  -9  -7  -2 54.6860  8.0951   1
   9  -7   2 37.1558  7.0709   1
   9   7   2 64.0143  9.0876   1
  -9   7  -2 45.4044  7.8071   1
 -10  -7  -2 15.3173  5.3830   1
  10  -7   2 6.96827 4.92433   1
 -10   7  -2 16.5064  5.8041   1
  10   7   2 18.3798  6.1814   1
 -11  -7  -2 7.94633 5.01725   1
  11  -7   2 11.4113  5.9222   1
  11   7   2 6.78932 5.61522   1
 -11   7  -2 3.05688 4.51309   1
  12  -7   2 1.55999 5.24958   1
 -12  -7  -2 8.66805 5.34515   1
 -12   7  -2 7.83574 5.59424   1
  12   7   2 3.28709 4.90341   1
  13  -7   2 37.3939  9.0648   1
 -13  -7  -2 43.4747  9.5611   1
  13   7   2 60.3502 11.0326   1
 -13   7  -2 28.2522  8.6097   1
 -13  -8   2 9.77711 6.07344   1
 -13   8   2 -1.3876  4.4307   1
 -12  -8   2 8.17307 5.58538   1
 -12   8   2 4.04456 4.72029   1
 -11  -8   2 6.17144 5.64261   1
  11  -8  -2 22.1668  6.2950   1
 -11   8   2 13.0491  5.7127   1
  11   8  -2 25.4196  6.3866   3
  11   8  -2 21.7185  6.7920   1
 -10  -8   2 117.402  12.200   1
  10  -8  -2 122.055  11.537   1
  10   8  -2 105.537  11.428   1
  10   8  -2 122.970  11.427   3
  10   8  -2 137.854  13.619   5
 -10   8   2 118.296  12.175   1
  -9  -8   2 226.179  14.530   1
   9  -8  -2 255.147  14.696   1
   9   8  -2 259.360  14.783   3
  -9   8   2 232.271  14.818   1
   9   8  -2 243.666  14.627   1
   8  -8  -2 115.274   9.125   1
  -8  -8   2 104.183  10.049   1
  -8   8   2 96.4997  9.9446   1
   8   8  -2 102.277   9.737   3
   8   8  -2 111.168  10.320   1
   7  -8  -2 79.6417  7.9267   1
  -7  -8   2 72.7045  7.8403   1
  -7   8   2 69.8163  8.0913   1
   7   8  -2 71.9296  8.0368   5
   7   8  -2 70.3675  7.7141   3
   7   8  -2 79.9574  8.2375   1
   6  -8  -2 188.244  10.355   1
  -6  -8   2 161.562  10.173   1
   6   8  -2 177.557  10.770   3
  -6   8   2 160.629  10.286   1
   6   8  -2 177.254  10.464   1
   6   8  -2 179.631  11.190   5
  -5  -8   2 40.2129  5.0736   1
   5  -8  -2 51.2229  5.4569   1
   5  -8  -2 46.7870  3.3538   2
   5   8  -2 45.3712  5.7073   3
   5   8  -2 38.1215  5.2352   5
   5   8  -2 42.3957  5.3217   1
  -5   8   2 39.3988  5.0267   1
   4  -8  -2 18.5234  2.6121   2
  -4  -8   2 24.5623  3.8770   1
   4  -8  -2 19.6422  3.3726   1
   4   8  -2 22.2734  3.7265   1
  -4   8   2 27.1692  4.0801   1
   4   8  -2 13.9210  3.3769   5
   3  -8  -2 270.972  10.559   2
  -3  -8   2 250.637  11.399   1
   3  -8  -2 266.843  11.147   1
  -3   8   2 262.451  11.479   1
   3   8  -2 277.908  11.474   1
  -2  -8   2 1216.99   39.55   1
  -2  -8   2 1210.60   41.78   4
  -2  -8   2 1240.18   41.72   5
   2  -8  -2 1230.92   39.21   1
   2   8  -2 1253.96   39.65   1
   2   8  -2 1196.59   41.75   5
  -2   8   2 1224.71   39.61   1
  -1  -8   2 113.361   6.061   1
   1  -8  -2 116.290   4.691   5
  -1  -8   2 110.242   6.397   5
  -1  -8   2 112.795   5.984   4
   1  -8  -2 114.291   5.951   1
   1   8  -2 112.179   6.548   5
   1   8  -2 113.127   6.190   1
  -1   8   2 115.454   5.851   4
  -1   8   2 108.549   5.971   1
   1   8  -2 108.132   5.913   4
   0  -8   2 314.969  13.160   5
   0  -8  -2 332.284  11.975   4
   0  -8   2 327.625  12.695   1
   0  -8  -2 327.233  12.282   1
   0   8   2 313.663  11.907   4
   0   8   2 315.410  12.576   1
   0   8  -2 338.308  12.707   1
   0   8   2 326.652  11.649   5
   0   8  -2 331.956  12.730   4
  -1  -8  -2 28.2058  2.8493   4
   1  -8   2 37.7756  3.8644   1
  -1  -8  -2 28.9496  3.3621   1
   1   8   2 35.2211  3.2369   5
   1   8   2 35.3081  4.0135   1
  -1   8  -2 33.2202  3.7802   1
  -2  -8  -2 835.379  27.941   1
   2  -8   2 795.797  28.035   1
  -2  -8  -2 814.045  27.792   1
   2   8   2 833.151  28.232   1
  -2   8  -2 810.776  27.969   1
   3  -8   2 54.0912  5.6295   1
  -3  -8  -2 78.0920  5.7405   1
   3   8   2 68.5536  5.7190   1
  -3   8  -2 62.9743  5.2880   1
  -4  -8  -2 0.47789 2.44203   1
   4  -8   2 9.10968 3.13771   1
  -4   8  -2 3.21480 2.48594   1
   4   8   2 0.24316 2.62694   1
  -5  -8  -2 13.5357  3.6443   1
   5  -8   2 14.2197  3.8068   1
   5   8   2 18.1143  4.4374   1
  -5   8  -2 8.94426 3.29990   1
   6  -8   2 20.6952  4.9008   1
  -6  -8  -2 28.8441  5.2947   1
  -6   8  -2 30.2963  5.5624   1
   6   8   2 19.2463  4.7311   1
   7  -8   2 36.6207  6.4337   1
  -7  -8  -2 38.0743  6.1943   1
   7   8   2 39.8960  5.1291   3
   7   8   2 33.2721  6.2358   1
  -7   8  -2 31.3725  5.8703   1
  -8  -8  -2 -0.0782  3.1672   1
   8  -8   2 -1.0691  3.5716   1
   8   8   2 6.33939 4.39604   1
  -8   8  -2 0.68028 3.27432   1
   8   8   2 4.08361 3.23624   3
  -9  -8  -2 6.67602 4.41397   1
   9  -8   2 13.9441  4.9887   1
  -9   8  -2 5.53647 4.79058   1
   9   8   2 4.83370 4.76297   1
  10  -8   2 5.81658 4.59918   1
 -10  -8  -2 -2.2432  2.8954   1
  10   8   2 -4.2075  3.2710   1
 -10   8  -2 6.45503 4.36962   1
 -11  -8  -2 -5.9520  3.7576   1
  11  -8   2 8.15795 5.62488   1
 -11   8  -2 3.61594 4.82286   1
  11   8   2 0.83408 4.45307   1
  12  -8   2 53.9960  9.8422   1
 -12  -8  -2 21.1694  7.3674   1
 -12   8  -2 52.6856  9.8100   1
  12   8   2 32.0938  8.4136   1
 -13  -8  -2 6.27671 5.94865   1
  13  -8   2 30.3579  8.4752   1
 -13   8  -2 20.4340  7.8945   1
  13   8   2 19.3947  7.7958   1
 -13  -9   2 -1.6664  4.3809   1
 -13   9   2 -1.9416  4.6427   1
 -12  -9   2 106.060  13.104   1
 -12   9   2 125.067  13.936   1
 -11  -9   2 167.528  13.809   1
  11  -9  -2 156.418  12.732   1
  11   9  -2 154.965  12.937   1
 -11   9   2 185.744  14.103   1
  11   9  -2 148.446  12.545   3
 -10  -9   2 12.7435  4.5557   1
  10  -9  -2 2.90300 4.00035   1
  10   9  -2 10.1446  4.7381   5
  10   9  -2 9.75627 5.11026   1
  10   9  -2 9.25349 5.27372   3
 -10   9   2 0.71711 3.91066   1
   9  -9  -2 -0.7772  3.4548   1
  -9  -9   2 4.00652 3.64298   1
   9   9  -2 5.31328 4.30608   1
   9   9  -2 -0.4671  3.7387   3
   9   9  -2 -3.6899  2.3317   5
  -9   9   2 4.38616 4.14116   1
  -8  -9   2 194.967  12.827   1
   8  -9  -2 235.819  13.243   1
  -8   9   2 228.508  13.908   1
   8   9  -2 202.283  13.810   5
   8   9  -2 213.676  13.265   1
   8   9  -2 234.960  13.401   3
  -7  -9   2 219.792  13.091   1
   7  -9  -2 233.029  12.870   1
   7   9  -2 245.020  13.548   3
  -7   9   2 230.687  12.960   1
   7   9  -2 233.720  14.054   5
   7   9  -2 240.095  13.164   1
  -6  -9   2 15.0882  4.2307   1
   6  -9  -2 15.9659  3.9153   1
   6   9  -2 11.0190  3.6518   5
   6   9  -2 17.6767  4.5239   3
  -6   9   2 17.9168  4.2199   1
   6   9  -2 7.61897 3.60634   1
   5  -9  -2 54.5412  3.7495   2
  -5  -9   2 59.2354  6.2824   1
  -5  -9   2 53.1421  6.0281   1
   5  -9  -2 60.3870  6.0731   1
   5   9  -2 51.3924  6.1425   5
   5   9  -2 56.0126  5.8879   1
   5   9  -2 53.3154  6.1471   3
  -5   9   2 50.7400  5.8292   1
  -4  -9   2 -0.2521  1.8290   1
   4  -9  -2 6.91487 2.43343   1
   4  -9  -2 3.72159 1.78784   2
   4   9  -2 -1.8002  1.8283   5
   4   9  -2 0.92666 2.25931   1
  -4   9   2 -1.3616  1.9163   1
  -3  -9   2 349.828  14.163   1
   3  -9  -2 356.704  13.286   2
   3  -9  -2 367.118  13.981   1
   3   9  -2 354.396  15.390   5
   3   9  -2 327.326  13.942   1
  -3   9   2 334.850  14.203   1
  -2  -9   2 97.8253  6.2346   5
  -2  -9   2 98.1183  6.1055   1
   2  -9  -2 86.3719  5.6118   1
  -2  -9   2 103.475   6.029   4
   2   9  -2 101.096   6.605   5
   2   9  -2 95.0871  6.0945   1
  -2   9   2 87.4825  5.9626   1
   1  -9  -2 102.140   4.648   5
  -1  -9   2 104.569   5.693   4
  -1  -9   2 109.247   6.312   1
   1  -9  -2 104.306   5.941   1
  -1  -9   2 107.383   6.384   5
   1   9  -2 112.048   6.330   1
  -1   9   2 105.144   5.556   4
  -1   9   2 101.861   6.148   1
   1   9  -2 99.3516  6.4015   5
   1   9  -2 106.487   5.679   4
   0  -9  -2 234.123   9.809   1
   0  -9   2 231.163  10.451   5
   0  -9   2 228.328   9.994   1
   0   9   2 223.541   8.911   5
   0   9  -2 249.166   9.925   4
   0   9  -2 234.852  10.007   1
   0   9   2 221.067   8.833   4
   0   9   2 233.173  10.142   1
   1  -9   2 40.7769  4.2950   1
  -1  -9  -2 40.1651  4.1210   1
  -1  -9  -2 37.9799  3.1920   4
   1   9   2 48.7486  3.6038   5
   1   9   2 33.2615  4.0458   1
  -1   9  -2 43.8348  4.4227   1
  -1   9  -2 44.1356  4.1903   4
   2  -9   2 4.65317 2.51465   1
  -2  -9  -2 3.41935 2.15409   1
   2   9   2 0.95089 2.11386   1
  -2   9  -2 2.80591 2.16381   1
  -3  -9  -2 425.362  17.101   1
   3  -9   2 431.398  17.297   1
   3   9   2 424.917  17.537   1
  -3   9  -2 435.411  17.252   1
  -4  -9  -2 112.867   7.449   1
   4  -9   2 100.492   7.841   1
   4   9   2 111.079   7.804   1
  -4   9  -2 123.670   8.159   1
  -5  -9  -2 7.03926 3.23656   1
   5  -9   2 5.82432 3.33001   1
   5   9   2 1.52292 3.15510   1
  -5   9  -2 2.79693 2.87382   1
  -6  -9  -2 44.4963  6.1238   1
   6  -9   2 53.0520  7.0994   1
  -6   9  -2 47.1299  6.7410   1
   6   9   2 40.8297  6.3697   1
  -7  -9  -2 91.1328  9.3149   1
   7  -9   2 85.8148  9.3323   1
   7   9   2 86.6296  7.4202   3
   7   9   2 91.9898  9.6852   1
  -7   9  -2 96.3919  9.7558   1
  -8  -9  -2 2.46009 3.39864   1
   8  -9   2 1.48233 3.62318   1
   8   9   2 10.8304  4.9081   1
   8   9   2 5.59291 3.31128   3
  -8   9  -2 4.45296 4.09004   1
  -9  -9  -2 12.2365  5.0676   1
   9  -9   2 5.94174 4.55292   1
   9   9   2 12.4178  4.2783   3
   9   9   2 18.4914  5.7242   1
  -9   9  -2 13.1651  5.1911   1
  10  -9   2 13.5104  5.5476   1
 -10  -9  -2 14.6377  5.6304   1
 -10   9  -2 5.92044 4.93176   1
  10   9   2 15.6711  6.0477   1
 -11  -9  -2 3.92259 4.95139   1
  11  -9   2 5.79100 5.19917   1
  11   9   2 2.15458 4.17471   1
 -11   9  -2 -6.0198  3.5464   1
  12  -9   2 63.4642 10.9485   1
 -12  -9  -2 73.4479 11.4272   1
  12   9   2 71.8840 11.2841   1
 -12   9  -2 108.754  13.544   1
 -13  -9  -2 38.5988  9.2316   1
  13  -9   2 29.6108  9.0445   1
 -13   9  -2 21.0494  7.8099   1
  13   9   2 28.9542  8.9990   1
 -13 -10   2 42.3461  9.3760   1
 -13  10   2 52.1663 10.4373   1
 -12 -10   2 -0.9625  4.8111   1
 -12  10   2 7.56783 5.27267   1
 -11 -10   2 56.9096  9.7045   1
  11  10  -2 67.4574  9.6175   3
 -11  10   2 65.0209  9.8615   1
  11  10  -2 73.5896 10.1090   1
 -10 -10   2 1.97841 4.04262   1
  10 -10  -2 5.42462 4.37205   1
  10  10  -2 2.79224 4.59374   3
  10  10  -2 1.23059 3.80892   5
  10  10  -2 0.99908 4.12644   1
 -10  10   2 1.19737 3.58740   1
   9 -10  -2 -6.3632  2.8960   1
  -9 -10   2 -1.3894  2.9960   1
  -9  10   2 -3.0909  3.0716   1
   9  10  -2 4.33064 3.96720   3
   9  10  -2 -3.7691  3.8333   1
   9  10  -2 -0.3776  3.1793   5
   8 -10  -2 31.7412  5.8498   1
  -8 -10   2 36.5858  6.1562   1
   8  10  -2 29.6562  5.9162   1
   8  10  -2 23.6405  5.4174   5
  -8  10   2 26.2743  5.8645   1
   8  10  -2 32.2704  6.1180   3
  -7 -10   2 2.62725 3.56172   1
   7 -10  -2 6.44679 3.57814   1
   7  10  -2 3.24580 3.51890   1
   7  10  -2 7.15322 3.51338   5
   7  10  -2 10.8546  4.2775   3
  -7  10   2 9.75921 4.29708   1
  -6 -10   2 28.2096  5.2135   1
   6 -10  -2 31.8162  5.1133   1
   6 -10  -2 27.1833  2.6923   2
  -6  10   2 21.5242  4.7856   1
   6  10  -2 32.1937  5.3210   1
   6  10  -2 26.6727  5.1821   3
   6  10  -2 36.2235  5.8559   5
   5 -10  -2 5.86115 2.93841   1
  -5 -10   2 17.8633  4.0396   1
  -5 -10   2 9.97066 3.47509   1
   5 -10  -2 10.9068  2.2179   2
   5  10  -2 10.0555  3.4131   1
   5  10  -2 10.4511  3.4271   5
  -5  10   2 5.28330 3.24311   1
  -4 -10   2 109.693   7.492   1
   4 -10  -2 118.385   5.997   2
   4 -10  -2 117.266   7.282   1
   4  10  -2 113.548   7.567   1
   4  10  -2 98.1245  7.6120   5
  -4  10   2 110.210   7.538   1
  -3 -10   2 208.062   9.993   1
   3 -10  -2 199.578   9.627   1
   3  10  -2 206.246  10.102   1
  -3  10   2 196.269   9.971   1
  -2 -10   2 114.797   6.346   4
   2 -10  -2 110.787   6.479   1
  -2 -10   2 107.818   6.864   5
  -2 -10   2 106.028   6.747   1
   2  10  -2 102.006   6.941   5
   2  10  -2 118.263   6.683   1
  -2  10   2 111.806   6.660   1
   1 -10  -2 969.800  31.413   5
  -1 -10   2 954.627  32.835   4
   1 -10  -2 969.645  31.979   1
  -1 -10   2 916.324  32.145   1
  -1 -10   2 984.842  33.831   5
   1  10  -2 965.477  32.923   4
   1  10  -2 934.990  32.205   1
  -1  10   2 1007.36   32.52   1
   1  10  -2 972.309  33.955   5
  -1  10   2 955.793  32.752   4
   0 -10  -2 231.557   9.018   5
   0 -10  -2 216.988   9.799   1
   0 -10   2 227.145  10.246   1
   0 -10   2 223.827  10.458   5
   0  10  -2 231.669  10.262   1
   0  10   2 229.149  10.218   1
   0  10   2 226.705   9.053   5
   0  10  -2 237.648   9.677   4
   0  10   2 217.690   8.614   4
   1 -10   2 275.709  12.417   1
   1 -10   2 282.191  12.627   5
  -1 -10  -2 298.023  11.041   4
  -1 -10  -2 294.808  12.281   1
  -1  10  -2 299.364  12.548   4
   1  10   2 304.328  12.718   1
  -1  10  -2 300.801  12.560   1
   1  10   2 293.300  11.749   5
  -2 -10  -2 675.242  23.870   1
   2 -10   2 659.959  24.081   1
   2  10   2 685.388  24.213   5
   2  10   2 667.334  24.220   1
  -2  10  -2 639.851  23.860   1
   3 -10   2 1001.81   34.33   1
  -3 -10  -2 1007.45   33.88   1
  -3 -10  -2 935.757  33.694   1
  -3  10  -2 966.309  33.919   1
   3  10   2 992.874  34.314   1
  -4 -10  -2 40.0347  5.2259   1
   4 -10   2 56.1774  6.3164   1
  -4  10  -2 49.4056  5.7889   1
   4  10   2 50.8359  6.0332   1
   5 -10   2 114.077   8.864   1
  -5 -10  -2 104.881   7.863   1
  -5  10  -2 86.9271  8.5249   1
   5  10   2 130.661   9.280   1
   6 -10   2 170.540  11.494   1
  -6 -10  -2 169.722  10.966   1
   6  10   2 169.163  11.557   1
  -6  10  -2 161.901  11.014   1
   7 -10   2 1.79732 3.83520   1
  -7 -10  -2 2.61860 3.28334   1
   7  10   2 -2.5831  3.5831   1
  -7  10  -2 -1.5539  3.1765   1
  -8 -10  -2 19.0252  5.3420   1
   8 -10   2 22.3010  5.6346   1
   8  10   2 22.0388  4.6775   3
  -8  10  -2 17.1677  5.3124   1
   8  10   2 19.5927  5.9206   1
  -9 -10  -2 -4.2017  3.4739   1
   9 -10   2 0.31906 3.97384   1
   9  10   2 -2.6775  3.5844   1
   9  10   2 1.94865 3.64514   3
  -9  10  -2 -3.0942  2.9681   1
 -10 -10  -2 10.1516  5.4520   1
  10 -10   2 2.50883 4.32104   1
 -10  10  -2 2.93068 4.39436   1
  10  10   2 3.44873 4.95091   1
 -11 -10  -2 1.51303 4.62895   1
  11 -10   2 -1.6154  4.6626   1
  11  10   2 -1.8800  4.3061   1
 -11  10  -2 5.44956 5.10241   1
 -12 -10  -2 10.2499  5.7431   1
  12 -10   2 11.7065  6.5768   1
 -12  10  -2 5.75442 5.73302   1
  12  10   2 6.97686 5.86403   1
  13 -10   2 -0.6783  5.3883   1
 -13 -10  -2 1.98312 5.33803   1
  13  10   2 -1.0896  5.9931   1
 -13  10  -2 5.90890 5.77657   1
 -13 -11   2 1.40006 5.15081   1
 -13  11   2 7.28561 6.21948   1
 -12 -11   2 5.93340 5.71839   1
 -12  11   2 6.77202 5.53791   1
 -11 -11   2 19.3935  6.8153   1
 -11  11   2 28.0890  7.3794   1
  11  11  -2 42.8277  8.2498   1
  11  11  -2 31.1339  7.6335   3
  10 -11  -2 144.408  11.965   1
 -10 -11   2 114.715  12.604   1
  10  11  -2 135.459  12.854   1
 -10  11   2 113.742  12.554   1
  10  11  -2 122.396  11.875   3
  -9 -11   2 6.34891 3.71264   1
   9 -11  -2 4.98901 3.97598   1
   9  11  -2 5.07268 4.58596   3
   9  11  -2 4.65790 4.34666   1
  -9  11   2 6.47742 4.15247   1
   9  11  -2 8.97244 4.31610   5
   8 -11  -2 4.26236 3.55473   1
  -8 -11   2 -6.2525  2.4675   1
  -8  11   2 6.63658 4.33329   1
   8  11  -2 -2.0849  3.4629   1
   8  11  -2 4.03254 4.18784   3
   8  11  -2 -1.0737  2.7215   5
  -7 -11   2 432.448  20.138   1
   7 -11  -2 466.518  20.029   1
   7  11  -2 470.684  22.051   5
   7  11  -2 420.149  20.309   3
   7  11  -2 457.215  20.301   1
  -7  11   2 419.618  20.301   1
   6 -11  -2 -0.0548  2.8515   1
   6 -11  -2 1.33460 1.67953   2
  -6 -11   2 5.14243 3.28332   1
   6  11  -2 5.99723 3.22580   5
  -6  11   2 2.09690 3.38133   1
   6  11  -2 2.44236 3.53651   3
   6  11  -2 -5.4108  2.5651   1
  -5 -11   2 1.82155 2.94662   1
   5 -11  -2 4.69194 2.87190   1
  -5 -11   2 3.28829 2.81262   1
   5 -11  -2 6.08688 2.10558   2
  -5  11   2 12.3091  3.7114   1
   5  11  -2 4.45804 2.89246   5
   5  11  -2 6.91137 3.27619   1
   4 -11  -2 175.775   9.647   1
   4 -11  -2 172.930   8.252   2
  -4 -11   2 203.801  10.463   1
   4  11  -2 190.144  10.077   1
   4  11  -2 193.167  10.902   5
  -4  11   2 179.300   9.987   1
  -3 -11   2 244.940  11.314   1
  -3 -11   2 229.485  11.827   5
   3 -11  -2 239.903  10.991   1
  -3 -11   2 227.836  11.167   4
  -3  11   2 229.928  11.188   1
   3  11  -2 240.229  12.172   5
   3  11  -2 243.699  11.477   1
   2 -11  -2 170.014   8.494   1
  -2 -11   2 163.208   8.882   5
  -2 -11   2 162.591   7.928   4
   2 -11  -2 170.366   7.116   5
  -2 -11   2 158.793   8.608   1
   2  11  -2 169.589   8.826   1
   2  11  -2 162.499   9.153   5
  -2  11   2 129.546   8.267   1
   1 -11  -2 7.24496 2.53809   1
  -1 -11   2 5.51460 2.26720   1
  -1 -11   2 9.19328 2.49475   5
  -1 -11   2 5.47366 1.80457   4
   1 -11  -2 6.27169 1.55867   5
   1  11  -2 7.08227 2.61880   1
  -1  11   2 8.72475 1.89783   4
  -1  11   2 6.51031 2.48036   1
   1  11  -2 3.40929 2.17102   5
   0 -11  -2 433.853  15.783   5
   0 -11   2 444.043  17.570   5
   0 -11  -2 427.847  16.626   1
   0 -11   2 430.651  16.833   1
   0  11   2 432.942  15.868   5
   0  11   2 437.153  15.250   4
   0  11  -2 469.818  16.528   4
   0  11   2 430.749  16.993   1
   0  11  -2 439.717  16.957   1
  -1 -11  -2 155.535   8.340   1
   1 -11   2 130.236   8.202   1
  -1 -11  -2 170.550   6.597   4
   1 -11   2 148.076   8.304   5
  -1  11  -2 154.705   8.108   4
  -1  11  -2 162.150   8.630   1
   1  11   2 156.526   8.495   1
   1  11   2 171.033   7.850   5
   2 -11   2 410.878  16.504   1
  -2 -11  -2 385.010  16.068   1
  -2  11  -2 416.558  16.516   1
   2  11   2 406.746  16.178   5
   2  11   2 401.395  16.562   1
   3 -11   2 33.9265  4.9300   1
  -3 -11  -2 18.9932  3.7280   1
  -3 -11  -2 20.3774  3.8211   1
  -3  11  -2 23.1925  4.2026   1
   3  11   2 22.5757  4.2209   1
  -4 -11  -2 374.762  16.516   1
   4 -11   2 384.544  16.733   1
  -4  11  -2 381.535  16.755   1
   4  11   2 352.567  16.522   1
  -5 -11  -2 59.7636  6.8734   1
   5 -11   2 54.8822  6.8328   1
   5  11   2 57.5029  7.0983   1
  -5  11  -2 60.2317  7.2095   1
  -6 -11  -2 23.6351  5.2232   1
   6 -11   2 16.4957  5.2115   1
  -6  11  -2 25.2264  5.4539   1
   6  11   2 14.2119  5.2761   1
   7 -11   2 35.8251  6.5193   1
  -7 -11  -2 36.2801  6.3983   1
   7  11   2 35.9716  6.7320   1
  -7  11  -2 24.5186  5.6554   1
   8 -11   2 92.7047 10.4493   1
  -8 -11  -2 117.373  11.348   1
   8  11   2 83.8078 10.1826   1
  -8  11  -2 115.238  11.506   1
   8  11   2 103.958   8.686   3
  -9 -11  -2 67.7821  9.3337   1
   9 -11   2 86.6101 10.5030   1
   9  11   2 79.5421  8.2839   3
  -9  11  -2 73.4623  9.7418   1
   9  11   2 79.8638 10.1623   1
  10 -11   2 -0.1818  3.8825   1
 -10 -11  -2 5.91349 4.92403   1
 -10  11  -2 4.77170 4.66262   1
  10  11   2 5.39610 4.98888   1
  11 -11   2 17.6646  6.7101   1
 -11 -11  -2 15.2451  6.1183   1
 -11  11  -2 33.0986  7.9820   1
  11  11   2 12.1358  6.1545   1
 -12 -11  -2 20.7315  6.9360   1
  12 -11   2 12.4177  6.3405   1
  12  11   2 17.1342  7.1701   1
 -12  11  -2 0.71922 5.50225   1
  13 -11   2 3.38551 5.69170   1
 -13 -11  -2 3.06448 5.83944   1
  13  11   2 6.27971 6.42464   1
 -13  11  -2 3.49687 5.54873   1
 -13 -12   2 40.4331  9.1607   1
 -13  12   2 47.0543 10.0713   1
 -12 -12   2 100.258  12.960   1
 -12  12   2 85.2081 12.2571   1
 -11 -12   2 -2.1832  3.9237   1
  11  12  -2 1.90392 4.60353   1
  11  12  -2 -3.5575  4.8128   3
 -11  12   2 -0.2064  3.8990   1
  10 -12  -2 166.157  12.898   1
 -10 -12   2 185.363  14.090   1
  10  12  -2 176.873  13.454   3
 -10  12   2 173.697  13.671   1
  10  12  -2 170.550  13.595   1
   9 -12  -2 2.11258 3.93568   1
  -9 -12   2 6.60295 4.09638   1
   9  12  -2 3.77631 3.89967   5
   9  12  -2 -3.8040  3.6948   1
   9  12  -2 3.85679 4.54741   3
  -9  12   2 -3.3769  3.1801   1
   8 -12  -2 20.8690  5.2782   1
  -8 -12   2 15.9411  4.7929   1
  -8  12   2 10.2019  4.5826   1
   8  12  -2 11.4221  4.6421   1
   8  12  -2 13.9191  5.0894   3
   8  12  -2 15.5470  4.9387   5
  -7 -12   2 1.38986 2.98556   1
   7 -12  -2 1.65968 3.24740   1
   7  12  -2 2.15355 4.09632   3
  -7  12   2 -1.5080  3.5821   1
   7  12  -2 3.95174 3.81663   1
   7  12  -2 -1.2609  2.9000   5
  -6 -12   2 739.974  29.912   1
   6 -12  -2 796.319  29.487   1
   6 -12  -2 790.645  25.518   2
  -6 -12   2 789.308  30.069   1
   6  12  -2 764.160  29.767   1
   6  12  -2 790.712  30.795   3
   6  12  -2 774.918  31.843   5
  -6  12   2 781.137  30.180   1
   5 -12  -2 279.093  11.232   2
  -5 -12   2 283.785  14.047   1
   5 -12  -2 292.900  13.672   1
  -5  12   2 272.260  14.029   1
   5  12  -2 261.517  13.513   1
   5  12  -2 305.848  15.290   5
   4 -12  -2 51.3264  4.7343   2
  -4 -12   2 53.2290  6.1904   1
   4 -12  -2 56.7972  5.9224   1
   4  12  -2 61.3200  6.8611   5
   4  12  -2 50.6825  5.9801   1
  -4  12   2 55.1465  6.1914   1
  -3 -12   2 71.3884  5.9190   1
  -3 -12   2 79.0693  6.3027   5
   3 -12  -2 73.5882  5.8362   1
  -3 -12   2 70.4760  5.6260   4
  -3  12   2 67.5426  6.4907   1
   3  12  -2 54.3638  5.7822   1
   3  12  -2 61.4676  6.4115   5
   2 -12  -2 166.682   8.824   1
  -2 -12   2 172.947   9.368   5
   2 -12  -2 173.968   7.478   5
  -2 -12   2 154.863   8.884   1
  -2 -12   2 166.488   8.152   4
  -2  12   2 163.388   9.114   1
   2  12  -2 171.934   9.247   1
   2  12  -2 169.721   9.572   5
  -1 -12   2 486.236  19.553   5
  -1 -12   2 500.838  17.920   4
   1 -12  -2 470.588  18.421   1
   1 -12  -2 491.865  17.402   5
  -1 -12   2 501.917  18.874   1
  -1  12   2 496.097  17.764   4
   1  12  -2 478.808  19.699   5
  -1  12   2 498.845  19.013   1
   1  12  -2 496.300  18.975   1
   0 -12   2 68.2774  6.2198   1
   0 -12   2 70.2339  5.6204   5
   0 -12  -2 67.9369  4.3957   5
   0 -12  -2 79.1537  5.5342   1
   0  12   2 76.1425  3.6426   4
   0  12   2 81.1203  5.9236   1
   0  12  -2 72.6570  5.8962   1
   0  12  -2 71.7611  4.6936   4
   0  12   2 81.8380  4.7654   5
   1 -12   2 563.641  21.568   5
  -1 -12  -2 568.992  18.923   4
  -1 -12  -2 548.061  20.705   1
   1 -12   2 558.832  21.149   1
  -1  12  -2 513.945  20.764   4
   1  12   2 569.962  21.317   1
   1  12   2 572.587  20.517   5
  -1  12  -2 555.900  21.041   1
  -2 -12  -2 18.4632  3.4667   1
  -2 -12  -2 18.5954  2.6157   4
   2 -12   2 13.6921  3.3419   1
  -2  12  -2 13.7170  3.2745   1
   2  12   2 17.4525  2.9560   5
   2  12   2 13.5376  3.3314   1
  -3 -12  -2 205.540  10.908   1
   3 -12   2 195.240  10.822   1
  -3 -12  -2 224.777  11.082   1
   3  12   2 214.920  11.459   1
   3  12   2 200.619  10.527   5
  -3  12  -2 198.765  10.867   1
  -4 -12  -2 6.19730 3.13226   1
   4 -12   2 8.62252 3.63427   1
  -4  12  -2 6.02504 3.33025   1
   4  12   2 14.0257  4.0952   1
  -5 -12  -2 1.05734 2.67810   1
   5 -12   2 2.21560 3.13815   1
   5  12   2 2.47758 3.41644   1
  -5  12  -2 0.03338 3.05823   1
  -6 -12  -2 50.9324  6.8500   1
   6 -12   2 56.4726  7.3421   1
  -6  12  -2 59.1312  7.4531   1
   6  12   2 48.2193  7.1994   1
  -7 -12  -2 55.4353  7.7210   1
   7 -12   2 70.5097  8.7841   1
  -7  12  -2 63.1534  8.3061   1
   7  12   2 85.1110  9.6498   1
  -8 -12  -2 2.16625 3.46444   1
   8 -12   2 2.61966 4.00523   1
   8  12   2 6.18356 4.68551   1
  -8  12  -2 10.2680  4.5740   1
   8  12   2 1.03740 3.43431   3
  -9 -12  -2 28.3509  6.3947   1
   9 -12   2 17.9788  6.0760   1
   9  12   2 20.7340  5.2801   3
  -9  12  -2 23.2964  6.5091   1
   9  12   2 11.5858  5.6388   1
 -10 -12  -2 89.4050 11.3376   1
  10 -12   2 89.1961 11.2835   1
 -10  12  -2 104.927  12.519   1
  10  12   2 74.7438 10.7061   1
 -11 -12  -2 51.2146  9.3954   1
  11 -12   2 35.3849  8.5037   1
 -11  12  -2 35.7747  8.5356   1
  11  12   2 32.8063  8.3390   1
 -12 -12  -2 191.960  18.561   1
  12 -12   2 205.365  16.374   1
  12  12   2 183.696  18.080   1
 -12  12  -2 158.562  17.274   1
 -13 -12  -2 0.81727 5.87685   1
  13 -12   2 12.6610  7.1713   1
 -13  12  -2 8.15578 6.90861   1
  13  12   2 11.3313  6.8274   1
 -13 -13   2 1.55489 5.27700   1
 -13  13   2 -5.3569  4.8363   1
 -12 -13   2 95.8122 12.8080   1
 -12  13   2 113.363  13.739   1
 -11 -13   2 70.6863 10.6043   1
 -11  13   2 56.6522  9.8689   1
  11  13  -2 76.1168 10.1711   3
  10 -13  -2 3.22636 4.58197   1
 -10 -13   2 7.17498 4.40119   1
  10  13  -2 -2.3825  4.8628   3
 -10  13   2 0.51875 3.86139   1
  10  13  -2 7.70048 4.80418   1
   9 -13  -2 126.782  11.574   1
  -9 -13   2 106.057  11.391   1
  -9  13   2 103.481  11.485   1
   9  13  -2 83.4558 10.0662   1
   9  13  -2 88.5837 10.2532   3
   9  13  -2 124.283  12.612   5
   8 -13  -2 20.0958  5.0718   1
  -8 -13   2 10.3707  4.4018   1
   8  13  -2 11.2473  4.5801   5
  -8  13   2 14.2925  4.7926   1
   8  13  -2 8.23995 4.50258   1
   8  13  -2 10.4658  5.0645   3
   7 -13  -2 628.062  25.623   1
  -7 -13   2 638.357  26.546   1
  -7  13   2 601.043  26.335   1
   7  13  -2 631.875  26.663   3
   7  13  -2 627.336  27.971   5
   7  13  -2 601.707  25.881   1
  -6 -13   2 282.228  14.820   1
  -6 -13   2 279.772  14.704   1
   6 -13  -2 269.049  10.638   2
   6 -13  -2 269.134  14.167   1
  -6  13   2 295.169  15.240   1
   6  13  -2 261.052  15.419   5
   6  13  -2 292.870  14.928   1
   5 -13  -2 26.3276  3.3521   2
   5 -13  -2 21.5115  4.4409   1
  -5 -13   2 20.1126  4.3992   1
   5  13  -2 19.4961  4.5403   5
  -5  13   2 12.3569  4.3097   1
   5  13  -2 18.9817  4.4375   1
   4 -13  -2 32.7962  4.7581   1
   4 -13  -2 34.4492  4.0523   2
  -4 -13   2 26.5560  4.7488   1
  -4  13   2 30.5280  5.0013   1
   4  13  -2 36.6339  5.4451   5
   4  13  -2 34.4986  5.2548   1
  -3 -13   2 1.53607 2.20825   1
  -3 -13   2 1.77519 1.88661   5
   3 -13  -2 -1.8177  1.9077   1
  -3 -13   2 2.05891 2.15342   4
  -3  13   2 -1.5595  2.1921   1
   3  13  -2 2.76331 2.48170   5
   3  13  -2 -0.1400  2.4822   1
   2 -13  -2 104.294   6.967   1
  -2 -13   2 99.1426  7.1567   1
  -2 -13   2 104.764   7.272   5
  -2 -13   2 106.540   6.035   4
   2 -13  -2 111.832   5.630   5
   2  13  -2 99.3365  7.3515   5
   2  13  -2 92.3544  6.8773   1
  -2  13   2 102.951   7.328   1
   1 -13  -2 93.5342  6.3838   1
  -1 -13   2 109.707   7.067   5
   1 -13  -2 103.523   5.343   5
  -1 -13   2 104.778   5.623   4
  -1 -13   2 111.105   7.260   1
  -1  13   2 93.0533  6.9830   1
   1  13  -2 106.468   7.249   5
   1  13  -2 94.4864  6.9959   1
  -1  13   2 91.7693  5.1807   4
   0 -13   2 185.508   9.686   1
   0 -13  -2 179.326   8.223   5
   0 -13  -2 175.276   9.340   1
   0 -13   2 197.974   9.996   5
   0  13  -2 186.962   8.247   4
   0  13  -2 181.078   9.764   1
   0  13   2 184.276   8.386   5
   0  13   2 179.809   9.800   1
   1 -13   2 19.4031  3.7747   1
  -1 -13  -2 19.4084  3.6339   1
   1 -13   2 11.5815  2.8520   5
   1  13   2 14.6573  2.7765   5
  -1  13  -2 18.3604  3.0312   4
   1  13   2 10.1594  3.1786   1
  -1  13  -2 16.3768  3.7303   1
  -2 -13  -2 123.952   6.339   4
  -2 -13  -2 136.271   8.414   1
   2 -13   2 136.906   8.715   1
   2  13   2 138.834   7.829   5
  -2  13  -2 119.129   8.275   1
   2  13   2 142.419   8.690   1
   3 -13   2 943.625  33.728   1
  -3 -13  -2 934.358  33.286   1
  -3 -13  -2 937.028  33.262   1
  -3  13  -2 942.472  33.652   1
   3  13   2 907.476  33.713   1
   3  13   2 949.156  34.049   5
  -4 -13  -2 62.9317  6.8710   1
   4 -13   2 55.3579  6.7861   1
  -4 -13  -2 57.6985  6.7246   1
  -4  13  -2 61.8558  6.8018   1
   4  13   2 47.6698  6.4593   1
   4  13   2 54.7742  6.3618   5
  -5 -13  -2 20.8711  4.8792   1
   5 -13   2 27.5528  5.6134   1
   5  13   2 26.4783  5.2982   1
  -5  13  -2 29.3954  5.3275   1
  -6 -13  -2 7.84060 3.90120   1
   6 -13   2 11.8297  4.5111   1
   6  13   2 13.5568  4.9072   1
  -6  13  -2 3.01577 4.12393   1
   7 -13   2 48.7062  7.7324   1
  -7 -13  -2 43.6928  7.0634   1
  -7  13  -2 45.1095  7.1009   1
   7  13   2 29.1325  6.2678   1
   8 -13   2 15.8720  5.1995   1
  -8 -13  -2 17.5631  5.0977   1
  -8  13  -2 15.1085  5.3733   1
   8  13   2 20.8282  5.7460   1
   8  13   2 11.7238  4.6671   3
   9 -13   2 49.2399  8.1557   1
  -9 -13  -2 31.1427  7.0809   1
   9  13   2 30.6856  7.1335   1
  -9  13  -2 40.6026  7.6540   1
   9  13   2 50.9091  7.3191   3
  10 -13   2 25.5023  7.2042   1
 -10 -13  -2 30.7793  7.4139   1
  10  13   2 28.1987  7.6136   1
 -10  13  -2 41.4703  8.3223   1
  11 -13   2 25.7965  7.2019   1
 -11 -13  -2 25.8088  7.5607   1
  11  13   2 12.7384  6.7916   1
 -11  13  -2 17.5190  6.5785   1
 -12 -13  -2 8.23705 5.99641   1
  12 -13   2 10.6585  6.4119   1
 -12  13  -2 5.29566 5.31342   1
  12  13   2 2.80174 5.47158   1
 -13 -13  -2 2.87063 5.57293   1
  13 -13   2 7.78039 6.46383   1
  13  13   2 12.3317  7.8121   1
 -13  13  -2 -2.9106  5.4215   1
 -13 -14   2 70.4167 12.0115   1
 -13  14   2 75.2550 12.0949   1
 -12 -14   2 42.1410  9.6049   1
 -12  14   2 56.3532 10.0685   1
 -11 -14   2 12.2294  5.8809   1
 -11  14   2 6.96765 5.44695   1
  11  14  -2 17.6009  6.6563   3
 -10 -14   2 106.521  11.912   1
  10 -14  -2 101.614  11.378   1
  10  14  -2 96.0707 11.1590   3
  10  14  -2 82.7965 11.0408   1
 -10  14   2 95.0909 11.3305   1
   9 -14  -2 29.1379  6.2674   1
  -9 -14   2 17.1380  5.7036   1
   9  14  -2 20.1440  6.0067   5
   9  14  -2 10.5762  5.6741   3
   9  14  -2 10.7413  5.0709   1
  -9  14   2 15.3814  5.5302   1
  -8 -14   2 9.11933 4.18667   1
   8 -14  -2 12.8579  4.7244   1
   8  14  -2 13.6237  5.0684   5
  -8  14   2 14.2990  5.0467   1
   8  14  -2 18.9017  5.8515   3
   8  14  -2 27.5732  6.2431   1
   7 -14  -2 95.3823  9.4667   1
  -7 -14   2 101.527  10.062   1
   7  14  -2 80.8041  9.5032   5
   7  14  -2 113.668  10.543   1
   7  14  -2 89.9806  9.9621   3
  -7  14   2 90.5465  9.5911   1
  -6 -14   2 3.68960 3.58810   1
   6 -14  -2 1.03858 1.93787   2
   6 -14  -2 2.14329 3.09801   1
  -6 -14   2 0.52020 3.12568   1
   6  14  -2 -4.2478  2.8312   1
   6  14  -2 4.29729 3.53059   5
  -6  14   2 0.32268 3.42804   1
   5 -14  -2 88.1772  8.2911   1
  -5 -14   2 106.600   8.458   1
   5 -14  -2 97.6189  5.9737   2
   5  14  -2 104.276   8.685   5
   5  14  -2 106.913   8.262   1
  -5  14   2 82.1017  8.5772   1
   4 -14  -2 85.8296  7.2715   1
  -4 -14   2 93.2146  7.6918   1
   4  14  -2 106.436   7.761   1
   4  14  -2 98.6640  8.0192   5
  -4  14   2 101.226   8.061   1
  -3 -14   2 14.6896  3.4196   5
   3 -14  -2 7.71143 3.03680   1
  -3 -14   2 11.3388  2.8370   4
  -3 -14   2 11.3165  3.2452   1
   3  14  -2 7.40813 3.07581   5
  -3  14   2 1.64929 2.83325   1
   3  14  -2 11.9473  3.5112   1
   2 -14  -2 86.0297  6.2931   1
  -2 -14   2 78.2317  6.3879   5
  -2 -14   2 75.3955  6.3247   1
  -2 -14   2 78.6109  5.2622   4
   2 -14  -2 83.9190  4.9496   5
   2  14  -2 85.9420  6.8829   1
   2  14  -2 92.4235  7.0419   5
  -2  14   2 85.5598  6.6504   1
  -1 -14   2 296.908  13.596   5
   1 -14  -2 277.285  11.430   5
   1 -14  -2 282.435  12.829   1
  -1 -14   2 287.474  13.250   1
  -1  14   2 284.427  13.424   1
  -1  14   2 284.454  11.092   4
   1  14  -2 307.745  13.637   1
   1  14  -2 288.215  13.839   5
   0 -14   2 1276.02   43.57   5
   0 -14  -2 1222.34   41.59   1
   0 -14   2 1233.23   42.19   1
   0 -14  -2 1280.93   41.54   5
   0  14   2 1233.26   42.28   1
   0  14  -2 1193.46   41.80   4
   0  14  -2 1242.59   42.20   1
   0  14   2 1270.02   41.70   5
   1 -14   2 356.450  15.604   5
  -1 -14  -2 330.809  14.905   1
   1 -14   2 376.076  15.742   1
  -1  14  -2 380.064  14.585   4
   1  14   2 336.773  15.521   1
   1  14   2 324.923  14.240   5
  -1  14  -2 354.832  15.516   1
  -2 -14  -2 226.425   9.200   4
  -2 -14  -2 221.665  11.499   1
   2 -14   2 235.251  12.155   1
  -2  14  -2 229.537  11.829   1
   2  14   2 243.112  12.370   1
   2  14   2 232.233  11.217   5
   3 -14   2 847.985  31.529   1
  -3 -14  -2 852.089  31.160   1
   3  14   2 813.982  31.373   5
  -3  14  -2 904.354  31.834   1
   3  14   2 851.149  31.751   1
  -4 -14  -2 280.820  14.435   1
   4 -14   2 301.706  14.838   1
  -4 -14  -2 297.555  14.706   1
  -4  14  -2 289.686  14.959   1
   4  14   2 289.600  15.035   1
   4  14   2 308.035  14.820   5
  -5 -14  -2 268.654  14.680   1
   5 -14   2 298.054  15.226   1
   5  14   2 278.318  14.905   5
  -5  14  -2 285.651  15.136   1
   5  14   2 272.037  14.849   1
   6 -14   2 100.215   9.828   1
  -6 -14  -2 94.6584  9.6289   1
   6  14   2 91.0093  9.7393   1
  -6  14  -2 83.5268  9.3805   1
   7 -14   2 -5.2646  3.0662   1
  -7 -14  -2 -2.9884  2.5615   1
  -7  14  -2 9.38854 4.29245   1
   7  14   2 0.79226 4.01152   1
  -8 -14  -2 9.22129 4.39459   1
   8 -14   2 13.2106  4.9131   1
  -8  14  -2 4.10808 4.14172   1
   8  14   2 16.3720  5.7579   1
   9 -14   2 11.4285  5.1276   1
  -9 -14  -2 6.99550 4.96009   1
   9  14   2 12.7440  5.5950   1
   9  14   2 13.4350  4.9305   3
  -9  14  -2 6.46342 4.68318   1
  10 -14   2 32.8716  7.4400   1
 -10 -14  -2 24.1072  6.5757   1
 -10  14  -2 30.5608  7.3396   1
  10  14   2 17.7829  6.1669   1
  11 -14   2 27.9478  7.7881   1
 -11 -14  -2 24.1727  7.4576   1
  11  14   2 37.0795  8.7227   1
 -11  14  -2 50.7830  9.6994   1
 -12 -14  -2 10.2845  5.9230   1
  12 -14   2 -0.9402  4.9566   1
 -12  14  -2 10.9984  5.9465   1
  12  14   2 0.79063 5.59009   1
 -13 -15   2 23.0713  8.4097   1
 -13  15   2 36.7873  8.6553   1
 -12 -15   2 22.6259  7.4887   1
 -12  15   2 11.6926  6.4181   1
 -11 -15   2 47.7785  9.4749   1
 -11  15   2 30.9505  7.8174   1
  11  15  -2 34.5255  8.0932   3
 -10 -15   2 89.9158 11.5229   1
  10 -15  -2 108.698  11.483   1
 -10  15   2 109.093  12.641   1
  10  15  -2 99.5168 11.5421   3
  10  15  -2 103.227  11.874   1
  -9 -15   2 -1.7579  3.3471   1
   9 -15  -2 4.01955 3.87810   1
   9  15  -2 -2.2141  4.1639   3
   9  15  -2 1.53299 4.49502   5
  -9  15   2 -2.1080  3.3657   1
   9  15  -2 7.04286 4.45765   1
  -8 -15   2 -0.8848  3.4185   1
   8 -15  -2 0.33055 3.90021   1
  -8  15   2 6.65199 3.94621   1
   8  15  -2 4.81490 4.79860   3
   8  15  -2 -2.1326  3.1462   1
   8  15  -2 5.83298 4.30793   5
   7 -15  -2 93.8843  9.5395   1
  -7 -15   2 93.4804  9.8178   1
  -7  15   2 87.1419  9.8919   1
   7  15  -2 71.0986  8.6614   1
   7  15  -2 68.7961  9.0842   3
   7  15  -2 103.044  10.710   5
  -6 -15   2 187.726  12.026   1
  -6 -15   2 180.044  11.883   1
   6 -15  -2 217.897  12.391   1
   6 -15  -2 195.982   8.779   2
  -6  15   2 187.765  12.489   1
   6  15  -2 196.102  13.107   5
   6  15  -2 197.663  12.307   1
  -5 -15   2 0.58102 2.62729   1
   5 -15  -2 -0.0395  2.1779   2
   5 -15  -2 0.81520 3.09274   1
   5  15  -2 4.24629 3.39197   1
   5  15  -2 -1.8084  2.6672   5
  -5  15   2 3.15089 3.29663   1
   4 -15  -2 69.2745  7.1558   1
  -4 -15   2 68.1390  7.4824   1
  -4 -15   2 68.2103  6.4913   4
   4  15  -2 61.0268  6.9629   1
  -4  15   2 54.1722  6.7913   1
   4  15  -2 66.3746  7.6198   5
  -3 -15   2 54.7023  5.1777   4
  -3 -15   2 63.3444  6.8562   1
   3 -15  -2 53.0323  5.9249   1
  -3 -15   2 61.8358  6.7727   5
   3 -15  -2 53.7070  4.3333   5
   3  15  -2 47.1352  6.0418   5
  -3  15   2 63.8775  6.8639   1
   3  15  -2 52.8366  6.3538   1
   2 -15  -2 28.2349  3.2472   5
  -2 -15   2 26.7657  4.3916   5
   2 -15  -2 30.5454  4.5726   1
  -2 -15   2 27.0898  4.6255   1
  -2 -15   2 22.9674  2.9676   4
  -2  15   2 25.9153  4.6528   1
   2  15  -2 24.6220  4.4115   5
   2  15  -2 25.9475  4.5366   1
   1 -15  -2 72.1861  6.7206   1
  -1 -15   2 66.4370  6.7226   1
  -1 -15   2 79.1880  6.3337   5
   1 -15  -2 67.6473  4.6330   5
   1  15  -2 81.9863  6.7996   1
  -1  15   2 74.4851  4.2120   4
   1  15  -2 61.3201  6.4963   5
  -1  15   2 69.8172  7.0169   1
   0 -15   2 58.8747  6.3486   1
   0 -15  -2 85.9840  6.4808   1
   0 -15   2 50.5310  5.7253   5
   0 -15  -2 69.4940  4.7699   5
   0  15  -2 62.7139  4.3425   4
   0  15   2 80.1708  5.2072   5
   0  15  -2 63.3350  6.5341   1
   0  15   2 71.4215  7.0699   1
  -1 -15  -2 340.408  15.259   1
   1 -15   2 353.064  15.736   1
   1 -15   2 346.421  15.594   5
   1  15   2 331.066  14.489   5
  -1  15  -2 367.619  14.455   4
  -1  15  -2 335.196  15.569   1
   1  15   2 364.425  15.967   1
  -2 -15  -2 23.1404  4.4298   1
   2 -15   2 20.1367  4.5124   1
   2 -15   2 19.0324  3.6260   5
  -2 -15  -2 14.3687  2.0197   4
   2  15   2 12.9890  4.0231   1
   2  15   2 15.0609  3.3128   5
  -2  15  -2 9.68188 3.55241   1
  -3 -15  -2 6.32705 3.06589   1
   3 -15   2 1.14358 3.04173   1
   3  15   2 3.78989 3.46188   1
  -3  15  -2 4.95115 3.29344   1
   3  15   2 2.58350 2.53552   5
   4 -15   2 587.470  23.690   1
  -4 -15  -2 565.492  23.178   1
  -4 -15  -2 557.638  23.120   1
  -4  15  -2 543.144  23.208   1
   4  15   2 507.278  22.856   5
   4  15   2 575.598  23.866   1
   5 -15   2 197.162  12.461   1
  -5 -15  -2 178.451  11.639   1
   5  15   2 181.098  12.335   1
   5  15   2 185.565  11.836   5
  -5  15  -2 219.121  12.910   1
   6 -15   2 39.7667  6.7337   1
  -6 -15  -2 35.6689  6.1746   1
   6  15   2 47.5498  7.6215   1
   6  15   2 43.8622  6.6840   5
  -6  15  -2 31.1850  6.3540   1
   7 -15   2 22.4407  5.9458   1
  -7 -15  -2 19.4271  5.1763   1
   7  15   2 16.2962  5.3544   1
   7  15   2 25.8315  5.9732   5
  -7  15  -2 26.2016  5.9075   1
  -8 -15  -2 19.4263  5.8841   1
   8 -15   2 24.3444  6.0284   1
  -8  15  -2 11.5267  5.2619   1
   8  15   2 21.7686  5.9007   5
   8  15   2 21.6136  6.5192   1
   9 -15   2 16.4294  5.5617   1
  -9 -15  -2 10.2000  5.1810   1
  -9  15  -2 5.81922 4.81555   1
   9  15   2 7.04373 4.86974   3
   9  15   2 7.82889 4.84155   5
   9  15   2 1.12976 4.37144   1
 -10 -15  -2 13.6387  5.9132   1
  10 -15   2 18.1208  6.0231   1
 -10  15  -2 7.19111 5.64771   1
  10  15   2 23.7243  7.0837   1
 -11 -15  -2 59.8501 10.3008   1
  11 -15   2 45.3389  9.0995   1
 -11  15  -2 74.0415 11.5284   1
  11  15   2 46.7491  9.6209   1
  12 -15   2 6.90894 5.95117   1
 -12 -15  -2 0.07165 4.81344   1
 -12  15  -2 4.27985 5.52590   1
  12  15   2 5.11735 6.25561   1
 -12 -16   2 30.6451  8.1751   1
 -12  16   2 33.0426  8.5385   1
 -11 -16   2 2.66039 4.80445   1
  11  16  -2 6.66666 5.97404   3
 -11  16   2 5.84326 5.09577   1
  10 -16  -2 31.5877  7.1987   1
 -10 -16   2 42.7689  8.1863   1
 -10  16   2 38.3712  8.1919   1
  10  16  -2 37.6316  8.2536   3
  10  16  -2 32.2254  7.3220   1
  -9 -16   2 3.39182 4.00057   1
   9 -16  -2 4.98732 4.19139   1
  -9  16   2 0.04721 3.45413   1
   9  16  -2 5.06841 4.92395   3
   9  16  -2 1.24716 4.14702   1
   8 -16  -2 21.3366  5.5488   1
  -8 -16   2 22.1970  5.7377   1
  -8  16   2 21.2374  5.9091   1
   8  16  -2 28.3808  6.7209   5
   8  16  -2 26.6201  6.0670   1
   8  16  -2 25.3781  6.4476   3
  -7 -16   2 6.74852 3.86584   1
   7 -16  -2 2.20936 3.38414   1
   7  16  -2 10.3708  4.4834   5
   7  16  -2 4.72276 4.04508   1
  -7  16   2 2.48390 3.76282   1
   7  16  -2 6.98403 4.64242   3
  -6 -16   2 32.5846  6.0338   1
   6 -16  -2 40.2152  6.1815   1
  -6 -16   2 50.9289  7.0977   1
   6 -16  -2 50.8314  4.6661   2
   6  16  -2 44.5241  6.9861   1
   6  16  -2 36.7623  6.4794   5
  -6  16   2 50.8401  7.3017   1
   5 -16  -2 195.290  11.730   1
   5 -16  -2 212.341   9.913   2
  -5 -16   2 205.085  12.081   1
  -5  16   2 171.207  11.838   1
   5  16  -2 197.923  12.099   1
   5  16  -2 178.051  12.317   5
   4 -16  -2 -1.3962  2.5968   1
  -4 -16   2 -1.1319  2.5432   1
  -4 -16   2 1.76722 2.61084   4
   4  16  -2 6.45302 3.66591   1
   4  16  -2 0.99926 2.93276   5
  -4  16   2 1.82664 2.94682   1
   3 -16  -2 7.89199 2.28016   5
   3 -16  -2 18.4105  3.9863   1
  -3 -16   2 18.5477  4.0430   5
  -3 -16   2 7.73307 3.29156   1
  -3 -16   2 12.6533  2.9990   4
  -3  16   2 19.7936  4.3910   1
   3  16  -2 16.2334  4.3490   1
   3  16  -2 12.5130  3.7773   5
  -2 -16   2 118.292   8.316   1
  -2 -16   2 112.948   8.121   5
   2 -16  -2 117.944   6.556   5
  -2 -16   2 131.090   6.374   4
   2 -16  -2 119.826   7.942   1
   2  16  -2 99.6147  7.9100   1
   2  16  -2 124.633   8.684   5
  -2  16   2 118.310   8.768   1
  -1 -16   2 14.4091  3.9066   1
   1 -16  -2 20.0767  2.8621   5
  -1 -16   2 16.0367  3.5512   5
   1 -16  -2 15.9035  3.5020   1
   1  16  -2 18.9647  3.9579   5
  -1  16   2 20.2412  2.2832   4
   1  16  -2 22.7206  4.3765   1
  -1  16   2 17.2101  4.2058   1
   0 -16  -2 -1.1099  2.2619   1
   0 -16   2 0.23091 1.84766   5
   0 -16  -2 2.49188 1.77498   5
   0 -16   2 -1.0970  2.2141   1
   0  16   2 8.27920 3.30906   1
   0  16  -2 1.59229 1.49272   4
   0  16  -2 0.96451 2.64707   1
   0  16   2 1.07351 1.81850   5
   1 -16   2 72.2606  6.2063   5
  -1 -16  -2 85.4839  6.8941   1
   1 -16   2 72.9256  7.3912   1
  -1  16  -2 62.5543  6.8750   1
  -1  16  -2 69.4168  5.2335   4
   1  16   2 77.6110  7.5512   1
   1  16   2 75.6386  5.7508   5
   2 -16   2 -0.7265  1.7728   5
   2 -16   2 3.53268 2.98486   1
  -2 -16  -2 1.77338 2.49360   1
   2  16   2 -0.5615  2.7104   1
  -2  16  -2 2.97787 2.95542   1
   2  16   2 1.81083 2.25579   5
   3 -16   2 67.4425  7.8112   1
  -3 -16  -2 62.0727  7.0416   1
  -3 -16  -2 70.2623  5.0345   4
  -3  16  -2 61.6595  7.2810   1
   3  16   2 65.6358  6.6251   5
   3  16   2 70.8813  7.7670   1
  -4 -16  -2 65.0253  7.5833   1
   4 -16   2 47.6580  7.0241   1
  -4 -16  -2 64.2264  7.5908   1
   4  16   2 55.5631  7.5151   1
  -4  16  -2 47.2627  6.9554   1
   4  16   2 61.4070  6.9839   5
  -5 -16  -2 24.3329  5.5965   1
   5 -16   2 26.4347  5.5190   1
  -5  16  -2 21.5398  5.3716   1
   5  16   2 28.6371  5.5369   5
   5  16   2 21.2945  5.2439   1
  -6 -16  -2 6.24291 4.15711   1
   6 -16   2 18.3092  5.1498   1
   6  16   2 11.9587  4.9834   1
  -6  16  -2 0.15119 3.78578   1
   6  16   2 5.86708 3.81745   5
   7 -16   2 34.7976  6.8608   1
  -7 -16  -2 25.6170  5.8106   1
   7  16   2 32.2031  6.9417   1
  -7  16  -2 31.7169  6.9378   1
   7  16   2 25.7641  5.8297   5
  -8 -16  -2 2.15459 3.49904   1
   8 -16   2 -1.5892  3.2845   1
   8  16   2 -1.4679  2.9550   5
   8  16   2 5.73758 4.22692   1
  -8  16  -2 0.29211 3.71846   1
  -9 -16  -2 5.94512 4.57687   1
   9 -16   2 6.79720 5.14385   1
   9  16   2 19.9574  5.8216   3
  -9  16  -2 11.1774  6.0480   1
   9  16   2 3.48524 5.32152   1
 -10 -16  -2 44.7802  9.0978   1
  10 -16   2 58.8692  9.6668   1
 -10  16  -2 42.2986  9.0716   1
  10  16   2 59.7123 10.1932   1
  11 -16   2 22.4536  7.6710   1
 -11 -16  -2 29.6353  7.9002   1
  11  16   2 28.5296  8.3245   1
 -11  16  -2 36.8652  9.0528   1
 -12 -16  -2 9.02834 6.18244   1
  12 -16   2 9.19572 6.47555   1
 -12  16  -2 4.36507 5.54504   1
  12  16   2 1.27289 5.84345   1
 -12 -17   2 4.89483 5.51801   1
 -12  17   2 5.84476 5.61050   1
 -11 -17   2 7.81928 5.13523   1
 -11  17   2 13.6955  6.0003   1
  11  17  -2 6.05734 6.02596   3
 -10 -17   2 0.02818 3.91673   1
  10  17  -2 0.67720 5.21166   3
  10  17  -2 3.69199 4.82590   1
 -10  17   2 0.02513 4.63295   1
   9 -17  -2 -1.5317  4.0316   1
  -9 -17   2 -3.4203  2.9477   1
   9  17  -2 -4.0006  4.6396   3
   9  17  -2 -1.8213  4.2788   1
  -9  17   2 0.54051 4.25657   1
   8 -17  -2 30.8570  6.6762   1
  -8 -17   2 32.0122  6.9582   1
   8  17  -2 25.2911  7.0595   3
   8  17  -2 38.9712  7.3841   5
   8  17  -2 40.4596  7.2688   1
  -8  17   2 32.8712  6.9134   1
  -7 -17   2 7.72839 3.48727   1
   7 -17  -2 20.6109  5.2173   1
   7  17  -2 22.2043  5.6763   1
  -7  17   2 20.9345  5.5930   1
   7  17  -2 13.2734  5.1069   5
   6 -17  -2 2.78187 2.41335   2
  -6 -17   2 0.44723 2.98912   1
   6 -17  -2 -2.3023  3.0302   1
  -6 -17   2 -1.7341  2.8504   1
   6  17  -2 3.17364 3.44725   5
  -6  17   2 3.05164 3.20469   1
   6  17  -2 4.78979 3.86601   1
   5 -17  -2 147.319  10.374   1
  -5 -17   2 148.618  10.558   1
   5 -17  -2 142.568   8.387   2
   5  17  -2 162.070  11.447   5
   5  17  -2 160.601  10.927   1
  -5  17   2 154.113  11.228   1
  -4 -17   2 94.0644  7.2561   4
   4 -17  -2 89.7271  8.5528   1
  -4 -17   2 104.190   9.589   1
  -4  17   2 77.5320  8.4366   1
   4  17  -2 104.209  10.067   5
   4  17  -2 101.731   9.538   1
  -3 -17   2 43.3010  6.1867   1
   3 -17  -2 56.0351  4.5156   5
  -3 -17   2 47.7808  4.6087   4
  -3 -17   2 55.6013  6.8362   5
   3 -17  -2 57.1800  6.7040   1
   3  17  -2 44.7565  6.1347   1
   3  17  -2 30.5124  5.3234   5
  -3  17   2 33.6004  5.6203   1
  -2 -17   2 9.18934 3.62931   1
   2 -17  -2 14.1346  3.8422   1
  -2 -17   2 12.6378  2.3605   4
   2 -17  -2 14.0357  2.6706   5
  -2 -17   2 12.2557  3.3893   5
  -2  17   2 6.84083 3.35389   1
   2  17  -2 15.0702  3.9898   5
   2  17  -2 18.0615  4.5224   1
  -1 -17   2 459.335  19.866   5
  -1 -17   2 474.886  19.828   1
   1 -17  -2 455.536  17.547   5
   1 -17  -2 450.927  19.033   1
  -1  17   2 453.496  19.782   1
   1  17  -2 460.163  19.723   1
   1  17  -2 451.788  20.034   5
  -1  17   2 457.814  16.052   4
   0 -17   2 3.18957 2.24037   5
   0 -17  -2 7.64532 2.23513   5
   0 -17   2 9.88500 3.59822   1
   0 -17  -2 7.31111 3.26613   1
   0  17  -2 6.01517 1.82816   4
   0  17   2 2.14082 2.11596   5
   0  17   2 6.17482 3.45872   1
   0  17  -2 8.89970 3.46660   1
   1 -17   2 75.5963  7.7270   1
  -1 -17  -2 87.9522  7.3590   1
   1 -17   2 88.0597  6.9323   5
  -1  17  -2 90.5118  5.8654   4
   1  17   2 78.5805  8.2211   1
  -1  17  -2 73.8078  7.6906   1
   1  17   2 81.2132  6.1679   5
   2 -17   2 94.4592  7.4770   5
  -2 -17  -2 102.294   7.906   1
   2 -17   2 83.9033  8.4303   1
  -2  17  -2 97.1830  9.1026   1
  -2  17  -2 97.9222  6.9959   4
   2  17   2 100.655   7.314   5
   2  17   2 97.6146  8.2116   1
   3 -17   2 22.5368  4.8832   1
  -3 -17  -2 29.1796  3.3370   4
  -3 -17  -2 31.4017  5.3437   1
  -3  17  -2 23.7252  5.0525   1
   3  17   2 19.9181  4.2357   5
   3  17   2 28.5957  5.6902   1
  -4 -17  -2 37.1269  6.0623   1
  -4 -17  -2 29.8029  5.6952   1
   4 -17   2 35.6717  6.0339   1
   4  17   2 32.9620  6.0914   1
   4  17   2 27.5680  4.9575   5
  -4  17  -2 28.1843  5.6501   1
   5 -17   2 -1.1744  3.0579   1
  -5 -17  -2 1.48043 3.25604   1
   5  17   2 -1.3697  2.9951   5
   5  17   2 -0.0717  3.8512   1
  -5  17  -2 2.07166 3.49198   1
   6 -17   2 75.2063  9.5059   1
  -6 -17  -2 85.0323  9.8358   1
  -6  17  -2 77.6776  9.5586   1
   6  17   2 93.5333  9.9291   5
   6  17   2 100.401  10.797   1
   7 -17   2 22.2596  5.7673   1
  -7 -17  -2 24.2973  5.9340   1
   7  17   2 24.6103  5.7749   5
   7  17   2 16.5750  5.4699   1
  -7  17  -2 14.5190  5.5239   1
  -8 -17  -2 20.3610  5.8157   1
   8 -17   2 27.6142  6.8257   1
   8  17   2 13.7813  5.8694   1
   8  17   2 20.4562  6.2663   5
  -8  17  -2 32.8143  7.3600   1
  -9 -17  -2 0.18923 3.64325   1
   9 -17   2 1.48329 4.42661   1
  -9  17  -2 -3.6167  3.9021   1
   9  17   2 3.64591 4.59714   3
   9  17   2 -0.9112  4.4702   1
 -10 -17  -2 39.3788  8.5934   1
  10 -17   2 53.1821  9.6197   1
 -10  17  -2 46.4410  9.3425   1
  10  17   2 27.6179  8.0159   1
  11 -17   2 22.4218  7.5613   1
 -11 -17  -2 24.7140  7.6302   1
  11  17   2 17.5268  6.8677   1
 -11  17  -2 11.2663  6.5630   1
 -12 -17  -2 -0.8822  4.7773   1
  12 -17   2 -1.4954  5.5230   1
 -12  17  -2 -1.6414  5.1148   1
  12  17   2 10.4194  6.5136   1
 -12 -18   2 -3.5310  4.8182   1
 -12  18   2 14.0510  6.7635   1
 -11 -18   2 4.35819 5.51861   1
  11  18  -2 13.6553  6.5184   3
 -11  18   2 3.03241 5.25285   1
 -10 -18   2 6.13434 4.92527   1
  10  18  -2 10.6473  6.2630   3
 -10  18   2 12.2092  5.7382   1
  10  18  -2 3.35656 4.69937   1
   9 -18  -2 1.98020 4.55978   1
  -9 -18   2 5.06936 4.41602   1
  -9  18   2 -4.0163  3.7274   1
   9  18  -2 -8.0599  4.4122   3
   9  18  -2 -2.9594  3.9676   1
   8 -18  -2 -1.9614  4.0691   1
  -8 -18   2 -2.1753  3.5091   1
   8  18  -2 0.57040 4.20309   3
   8  18  -2 3.10783 3.94043   5
   8  18  -2 -1.0899  3.7870   1
  -8  18   2 8.22177 4.59642   1
  -7 -18   2 13.1187  4.8186   1
  -7 -18   2 13.1284  4.9715   1
   7 -18  -2 11.1448  4.6193   1
  -7  18   2 9.75563 4.85315   1
   7  18  -2 6.55019 4.18549   5
   7  18  -2 5.90645 4.58207   1
  -6 -18   2 21.8665  5.1869   1
  -6 -18   2 11.2562  4.3886   1
   6 -18  -2 19.5269  3.6976   2
   6 -18  -2 15.3749  4.7062   1
   6  18  -2 15.5240  5.0736   5
   6  18  -2 24.8357  5.7962   1
  -6  18   2 20.2763  5.2999   1
   5 -18  -2 22.6092  5.0651   1
  -5 -18   2 8.43402 4.04753   1
   5 -18  -2 10.9219  3.5319   2
   5  18  -2 4.06610 3.52389   1
   5  18  -2 4.23939 3.57212   5
  -5  18   2 14.7636  4.9061   1
   4 -18  -2 8.71335 2.62062   5
  -4 -18   2 9.34438 3.16910   4
  -4 -18   2 1.17018 3.48866   1
   4 -18  -2 8.43136 3.91891   1
   4  18  -2 19.1522  4.8512   1
   4  18  -2 4.71322 3.47411   5
  -4  18   2 16.1085  4.6987   1
  -3 -18   2 1.83536 2.96301   1
  -3 -18   2 1.40515 2.18390   4
   3 -18  -2 4.67443 2.14866   5
  -3 -18   2 7.06688 2.98203   5
   3 -18  -2 5.50921 3.31177   1
   3  18  -2 2.34949 3.32953   1
  -3  18   2 -4.6323  2.2517   1
   3  18  -2 5.24635 3.13357   5
   2 -18  -2 25.6685  3.5253   5
  -2 -18   2 26.6577  4.6758   5
  -2 -18   2 21.1330  4.8376   1
   2 -18  -2 23.5034  4.8005   1
   2  18  -2 25.4685  5.0962   1
  -2  18   2 23.7472  5.2581   1
  -2  18   2 25.2140  3.2703   4
   2  18  -2 23.4705  4.6630   5
   1 -18  -2 5.76554 2.04664   5
  -1 -18   2 5.80473 2.96243   5
   1 -18  -2 1.92920 2.59338   1
  -1 -18   2 -0.5294  2.5488   1
   1  18  -2 7.31140 3.82783   1
   1  18  -2 6.17525 3.08005   5
  -1  18   2 3.20358 3.01607   1
   0 -18  -2 5.67291 2.15122   5
   0 -18   2 -0.3441  2.6200   1
   0 -18   2 1.25624 2.37743   5
   0 -18  -2 2.73168 2.85069   1
   0  18  -2 5.95476 3.37218   1
   0  18   2 3.92345 3.40369   1
   0  18  -2 4.83345 1.68406   4
   1 -18   2 25.8383  5.1069   1
  -1 -18  -2 19.3203  4.4496   1
   1 -18   2 15.6592  3.6095   5
  -1  18  -2 13.7113  2.7433   4
  -1  18  -2 17.4454  4.5732   1
   1  18   2 27.3371  5.0925   1
   1  18   2 19.0754  3.6201   5
   2 -18   2 54.1238  6.3316   5
  -2 -18  -2 57.5013  6.8452   1
   2 -18   2 59.2924  7.1317   1
  -2  18  -2 66.0468  6.2242   4
   2  18   2 61.8791  7.6554   1
   2  18   2 57.1146  6.1686   5
  -2  18  -2 61.0142  7.4731   1
   3 -18   2 70.7347  8.2703   1
  -3 -18  -2 67.0895  4.4244   4
   3 -18   2 86.2465  8.1276   5
  -3 -18  -2 76.0434  8.2676   1
  -3  18  -2 74.7281  8.2279   1
   3  18   2 56.8828  7.7204   1
   3  18   2 67.3499  7.1375   5
  -4 -18  -2 8.10414 3.65303   1
   4 -18   2 8.87378 4.32305   1
  -4 -18  -2 2.41742 3.15302   1
  -4  18  -2 -0.3947  3.2748   1
   4  18   2 6.73310 4.31120   1
   4  18   2 0.81727 2.69488   5
   5 -18   2 30.3642  6.1766   1
  -5 -18  -2 25.8777  5.9355   1
  -5 -18  -2 37.4983  6.5001   1
   5  18   2 44.8358  6.7705   5
  -5  18  -2 44.1223  7.2994   1
   5  18   2 21.1718  5.7044   1
  -6 -18  -2 238.755  14.873   1
   6 -18   2 257.615  15.468   1
   6  18   2 234.208  15.096   1
  -6  18  -2 241.964  15.175   1
   6  18   2 234.589  14.703   5
  -7 -18  -2 6.86379 4.22818   1
   7 -18   2 -1.6073  3.5791   1
  -7  18  -2 1.98392 3.74572   1
   7  18   2 2.05786 3.78611   5
   7  18   2 1.87405 4.08426   1
   8 -18   2 19.3623  6.1071   1
  -8 -18  -2 21.2837  5.9182   1
  -8  18  -2 11.8650  5.1995   1
   8  18   2 21.3937  6.6053   1
   8  18   2 30.1188  6.8725   5
   9 -18   2 23.7629  6.4740   1
  -9 -18  -2 16.7834  6.1539   1
   9  18   2 22.3192  6.7803   1
  -9  18  -2 16.1495  6.4829   1
   9  18   2 26.1701  6.5466   3
  10 -18   2 2.02278 4.44721   1
 -10 -18  -2 3.64985 4.84907   1
 -10  18  -2 -1.9309  4.2014   1
  10  18   2 3.36656 5.37409   1
  11 -18   2 -3.0475  4.8192   1
 -11 -18  -2 -5.2140  3.9443   1
 -11  18  -2 -7.4761  4.2662   1
  11  18   2 -1.7094  4.6838   1
 -12 -18  -2 11.1869  6.4564   1
  12 -18   2 23.4564  8.1418   1
  12  18   2 13.2414  7.3719   1
 -12  18  -2 10.5323  6.6238   1
 -12 -19   2 1.75489 5.44824   1
 -12  19   2 13.2985  6.5628   1
 -11 -19   2 -0.3166  4.4248   1
 -11  19   2 -1.6952  4.6731   1
  11  19  -2 7.25968 6.65781   3
 -10 -19   2 10.7178  5.4789   1
 -10  19   2 -3.0961  4.2410   1
  10  19  -2 1.92266 4.91120   1
  10  19  -2 -1.8542  4.9026   3
   9 -19  -2 13.5556  5.7516   1
  -9 -19   2 12.8436  5.4231   1
   9  19  -2 1.89115 4.73242   1
   9  19  -2 16.4390  6.6542   3
  -9  19   2 10.5788  5.7478   1
   8 -19  -2 1.10512 4.13114   1
  -8 -19   2 4.85850 4.15357   1
   8  19  -2 6.33900 4.75523   5
   8  19  -2 -0.5089  4.2424   1
  -8  19   2 2.74066 4.18536   1
   8  19  -2 0.79064 4.90360   3
  -7 -19   2 94.7772 10.8384   1
  -7 -19   2 95.4858 10.7407   1
   7 -19  -2 117.239  11.258   1
   7  19  -2 131.389  12.976   5
   7  19  -2 120.863  12.125   1
  -7  19   2 106.223  11.513   1
   6 -19  -2 98.8907 10.0248   1
  -6 -19   2 109.326  10.816   1
  -6 -19   2 104.702  10.695   1
   6  19  -2 87.6835 10.3946   5
   6  19  -2 94.8659 10.3917   1
  -6  19   2 91.8155 10.4676   1
  -5 -19   2 118.208   9.776   1
   5 -19  -2 143.420  10.313   1
   5 -19  -2 130.390   8.362   2
   5  19  -2 130.650  10.806   5
  -5  19   2 141.789  10.598   1
   5  19  -2 144.901  11.059   1
   4 -19  -2 24.2006  3.8328   5
  -4 -19   2 16.3428  4.9306   1
   4 -19  -2 31.3354  5.6562   1
   4  19  -2 35.9408  6.0498   1
  -4  19   2 23.7025  5.1998   1
   4  19  -2 34.5994  6.2168   5
   3 -19  -2 130.592   7.591   5
  -3 -19   2 124.449   6.874   4
  -3 -19   2 125.252   9.477   1
   3 -19  -2 127.011   9.381   1
   3  19  -2 123.236   9.766   1
   3  19  -2 126.145   9.880   5
  -3  19   2 138.135   9.978   1
  -2 -19   2 -3.3064  2.5347   1
  -2 -19   2 1.53746 2.32059   5
   2 -19  -2 4.23439 2.00634   5
   2 -19  -2 5.00171 3.10797   1
  -2  19   2 1.33372 1.69656   4
   2  19  -2 6.94015 3.44592   5
  -2  19   2 3.68530 3.47033   1
   2  19  -2 3.11779 3.58211   1
  -1 -19   2 11.2246  3.4012   5
  -1 -19   2 7.63446 3.60100   1
   1 -19  -2 10.3977  3.7547   1
   1 -19  -2 10.5347  2.5275   5
   1  19  -2 6.77742 3.32563   5
   1  19  -2 9.31114 4.03828   1
  -1  19   2 10.5512  4.3798   1
   0 -19   2 -3.2580  2.6458   1
   0 -19  -2 4.35850 3.16697   1
   0 -19  -2 1.85488 1.74872   5
   0 -19   2 0.43794 2.11991   5
   0  19   2 3.70151 3.24827   1
   0  19  -2 2.65390 3.23013   1
  -1 -19  -2 299.390  14.978   1
   1 -19   2 284.618  14.692   5
   1 -19   2 293.497  15.478   1
   1  19   2 297.122  15.486   1
  -1  19  -2 303.005  12.535   4
   1  19   2 305.052  14.072   5
  -1  19  -2 283.743  15.067   1
   2 -19   2 63.8746  7.0133   5
  -2 -19  -2 54.8453  7.0205   1
   2 -19   2 44.6601  6.7961   1
   2  19   2 39.9675  6.8926   1
  -2  19  -2 48.1021  6.8621   1
  -2  19  -2 59.8449  5.8819   4
   2  19   2 51.7777  6.0694   5
   3 -19   2 9.71720 4.23623   1
  -3 -19  -2 1.29739 3.37893   1
   3 -19   2 0.24459 2.46117   5
  -3  19  -2 -1.7601  3.3184   1
   3  19   2 2.58492 3.64554   1
   3  19   2 -0.4411  2.5831   5
  -4 -19  -2 68.7424  5.7377   4
  -4 -19  -2 80.9255  9.0164   1
  -4 -19  -2 75.8526  8.5839   1
   4 -19   2 60.6835  8.1040   1
   4  19   2 74.7348  8.0719   5
   4  19   2 71.7316  8.7877   1
  -4  19  -2 61.4906  8.1767   1
  -5 -19  -2 6.28504 3.84908   1
   5 -19   2 11.3435  4.5726   1
  -5 -19  -2 12.7003  4.2773   1
  -5  19  -2 11.3449  4.5590   1
   5  19   2 1.68363 4.22527   1
   5  19   2 8.37028 3.76575   5
  -6 -19  -2 30.5156  6.5085   1
   6 -19   2 32.3297  6.5134   1
   6  19   2 37.3628  7.2743   1
  -6  19  -2 39.0833  7.1853   1
   6  19   2 40.9275  7.0357   5
   7 -19   2 11.8803  5.2017   1
  -7 -19  -2 3.72309 4.11815   1
  -7  19  -2 8.96403 4.80995   1
   7  19   2 3.32103 3.84296   5
   7  19   2 3.35744 4.25693   1
  -8 -19  -2 5.12916 4.31381   1
   8 -19   2 0.14270 3.94836   1
   8  19   2 19.1361  6.3499   1
  -8  19  -2 6.90625 5.14508   1
   8  19   2 0.60080 4.28993   5
  -9 -19  -2 1.61049 4.34815   1
   9 -19   2 3.66955 4.60599   1
   9  19   2 1.27055 4.35943   1
  -9  19  -2 -2.5146  3.6039   1
  10 -19   2 6.44989 5.43077   1
 -10 -19  -2 6.83830 5.34955   1
 -10  19  -2 -0.2319  4.7454   1
  10  19   2 -0.0357  4.9945   1
 -11 -19  -2 19.3729  7.2746   1
  11 -19   2 16.7865  6.9775   1
  11  19   2 13.0635  7.1599   1
 -11  19  -2 34.4928  8.6571   1
  12 -19   2 -4.0768  5.4306   1
 -12 -19  -2 0.58056 4.90421   1
  12  19   2 -3.7389  5.8106   1
 -12  19  -2 0.58787 5.26819   1
 -12 -20   2 10.4221  6.3224   1
 -12  20   2 2.19800 5.41811   1
 -11 -20   2 28.5529  8.1802   1
 -11  20   2 27.2966  7.8147   1
  11  20  -2 34.8805  8.6304   3
 -10 -20   2 4.17934 4.74493   1
 -10  20   2 12.4539  6.2242   1
  10  20  -2 5.08127 5.71238   3
   9 -20  -2 -2.4524  3.7873   1
  -9 -20   2 5.69399 4.71159   1
   9  20  -2 8.46070 5.98518   3
  -9  20   2 0.65163 4.21132   1
   9  20  -2 7.34743 5.43669   1
  -8 -20   2 93.8428 11.6918   1
   8 -20  -2 113.808  11.765   1
  -8  20   2 94.1229 11.6410   1
   8  20  -2 104.128  12.506   3
   8  20  -2 126.895  12.756   1
  -7 -20   2 35.7346  7.1391   1
   7 -20  -2 38.7623  7.1198   1
  -7 -20   2 35.8826  7.1777   1
   7  20  -2 28.1219  6.7507   5
  -7  20   2 24.6384  6.4611   1
   7  20  -2 24.5564  6.2966   1
   6 -20  -2 71.8854  8.7862   1
  -6 -20   2 71.5235  9.1703   1
   6  20  -2 67.5420  8.9086   1
   6  20  -2 72.1743  9.3146   5
  -6  20   2 57.1076  8.4087   1
   5 -20  -2 17.3464  5.1067   1
   5 -20  -2 19.4901  4.4007   2
  -5 -20   2 11.5249  4.8190   1
   5  20  -2 24.0574  5.5114   5
  -5  20   2 5.96764 4.25032   1
   5  20  -2 16.9920  5.3782   1
   4 -20  -2 10.8373  2.9919   5
   4 -20  -2 9.77859 4.37361   1
  -4 -20   2 5.48271 3.71230   1
   4  20  -2 9.21202 4.06311   5
  -4  20   2 8.56404 4.51391   1
   4  20  -2 8.59397 4.41320   1
   3 -20  -2 14.0773  2.9909   5
  -3 -20   2 19.6551  4.8901   1
  -3 -20   2 9.16986 2.38646   4
   3 -20  -2 11.9843  3.9651   1
   3  20  -2 19.0242  4.9123   1
   3  20  -2 12.7628  4.2533   5
  -3  20   2 14.4341  4.8121   1
  -2 -20   2 43.5036  6.2512   5
   2 -20  -2 41.8971  6.1062   1
   2 -20  -2 49.4598  5.1541   5
  -2 -20   2 35.4452  6.2752   1
  -2  20   2 51.1250  7.0990   1
   2  20  -2 48.1688  7.0237   1
  -2  20   2 46.1031  4.1804   4
   2  20  -2 46.1213  6.5928   5
   1 -20  -2 5.39777 3.28354   1
  -1 -20   2 8.97131 3.91513   1
  -1 -20   2 11.7668  3.6007   5
   1 -20  -2 7.92292 2.46090   5
   1  20  -2 9.17769 4.25844   1
  -1  20   2 7.87358 3.91927   1
   0 -20  -2 238.091  13.615   1
   0 -20  -2 244.828  11.966   5
   0 -20   2 280.201  14.230   5
   0 -20   2 273.507  14.331   1
   0  20  -2 276.488  14.365   1
   0  20   2 237.722  14.111   1
   1 -20   2 115.246   8.507   5
   1 -20   2 103.826  10.126   1
  -1 -20  -2 107.930   8.998   1
   1  20   2 120.351   8.185   5
  -1  20  -2 103.425   6.297   4
  -1  20  -2 113.991   9.341   1
   1  20   2 116.210  10.795   1
   2 -20   2 3.97050 3.71419   1
   2 -20   2 -0.5221  2.3026   5
  -2 -20  -2 3.94335 3.27163   1
   2  20   2 1.76064 2.61985   5
   2  20   2 5.61347 4.14444   1
  -2  20  -2 0.02777 3.12481   1
  -2  20  -2 2.01117 2.36722   4
   3 -20   2 11.5360  4.5900   1
   3 -20   2 6.87968 3.26446   5
  -3 -20  -2 3.52135 3.70853   1
   3  20   2 11.6949  3.8137   5
  -3  20  -2 13.6562  4.8227   1
   3  20   2 12.0785  4.6634   1
  -4 -20  -2 180.786  12.109   1
   4 -20   2 206.336  13.021   1
  -4 -20  -2 189.389   9.010   4
  -4 -20  -2 190.344  12.548   1
   4  20   2 159.328  12.084   1
  -4  20  -2 179.406  12.651   1
   4  20   2 195.207  12.109   5
  -5 -20  -2 91.1612 10.2052   1
  -5 -20  -2 106.013  10.831   1
   5 -20   2 101.731  10.855   1
   5  20   2 86.6737  9.4680   5
   5  20   2 94.0172 10.4256   1
  -5  20  -2 82.9062  9.7620   1
   6 -20   2 8.22277 4.23607   1
  -6 -20  -2 -1.4599  2.8688   1
   6  20   2 -3.4152  3.1724   1
  -6  20  -2 5.74149 4.57225   1
   6  20   2 7.80999 4.18267   5
   7 -20   2 31.8182  7.1312   1
  -7 -20  -2 35.7305  6.9378   1
   7  20   2 37.3998  7.6628   1
   7  20   2 32.5106  6.9796   5
  -7  20  -2 35.2996  7.6437   1
  -8 -20  -2 25.3089  6.8372   1
   8 -20   2 13.8620  5.6373   1
  -8  20  -2 20.7723  6.8581   1
   8  20   2 19.1042  6.6520   1
  -9 -20  -2 -1.1593  4.3458   1
   9 -20   2 4.39779 4.86636   1
   9  20   2 -4.7069  4.5518   1
  -9  20  -2 -2.8904  4.1105   1
  10 -20   2 16.3818  6.6348   1
 -10 -20  -2 16.5230  6.5001   1
  10  20   2 21.1881  7.7219   1
 -10  20  -2 39.5601  8.9789   1
 -11 -20  -2 35.5974  8.8245   1
  11 -20   2 47.4742  9.6194   1
  11  20   2 14.6245  6.9670   1
 -11  20  -2 46.1638  9.7182   1
 -11 -21   2 33.9377  8.3693   1
  11  21  -2 47.4397 10.1855   3
 -11  21   2 38.0453  9.3347   1
 -10 -21   2 0.41595 4.57881   1
  10  21  -2 -4.7064  5.0834   3
 -10  21   2 6.93734 5.29182   1
   9 -21  -2 0.89486 4.33919   1
  -9 -21   2 -0.5446  3.9230   1
  -9  21   2 1.71883 4.34783   1
   9  21  -2 -5.6748  3.8114   1
   9  21  -2 5.85597 5.87170   3
  -8 -21   2 1.51627 4.07243   1
   8 -21  -2 14.0511  5.7639   1
   8  21  -2 3.09217 4.61639   1
   8  21  -2 7.59463 6.14521   3
  -8  21   2 4.60423 4.70951   1
  -7 -21   2 7.91314 4.60646   1
   7 -21  -2 6.57690 4.35282   1
  -7 -21   2 10.5794  5.0452   1
  -7  21   2 7.82862 5.09358   1
   7  21  -2 12.6943  5.3627   5
   7  21  -2 4.91640 4.90395   1
  -6 -21   2 2.70532 3.54773   1
   6 -21  -2 -6.8903  2.6659   1
   6  21  -2 -0.8390  3.5854   5
  -6  21   2 8.79963 4.38217   1
   6  21  -2 1.90090 4.06606   1
  -5 -21   2 89.7015  9.9180   1
   5 -21  -2 94.7093  9.7857   1
   5  21  -2 85.0191 10.1131   5
   5  21  -2 89.0953  9.9355   1
  -5  21   2 70.5633  9.1295   1
   4 -21  -2 2.94344 3.70921   1
  -4 -21   2 3.10535 3.23826   1
   4 -21  -2 2.16407 2.17959   5
  -4  21   2 4.67141 3.77803   1
   4  21  -2 3.62230 3.82112   1
   4  21  -2 7.27142 3.97683   5
   3 -21  -2 6.61437 2.36767   5
   3 -21  -2 -2.2919  2.6329   1
  -3 -21   2 9.16360 3.87206   1
  -3  21   2 3.15252 3.91760   1
   3  21  -2 5.47588 3.52295   5
   3  21  -2 4.07693 3.97160   1
  -2 -21   2 11.2307  4.3001   1
   2 -21  -2 8.48941 3.97727   1
   2 -21  -2 14.6736  3.1029   5
   2  21  -2 5.36451 3.77261   1
   2  21  -2 4.96706 3.38053   5
  -2  21   2 10.8630  4.5643   1
  -2  21   2 10.8556  2.2113   4
   1 -21  -2 -1.3435  2.8805   1
  -1 -21   2 1.05047 2.33541   5
  -1 -21   2 2.57752 3.15204   1
   1 -21  -2 3.11424 2.11012   5
   1  21  -2 4.81686 4.04773   1
  -1  21   2 -1.7344  3.2748   1
   0 -21  -2 10.6960  4.2011   1
   0 -21  -2 6.27785 2.41034   5
   0 -21   2 3.83857 2.87047   5
   0 -21   2 2.55956 3.60907   1
   0  21  -2 8.93307 4.28096   1
   0  21   2 13.2959  4.4283   1
   1 -21   2 25.6395  4.8733   5
   1 -21   2 26.1937  5.7383   1
  -1 -21  -2 20.0940  4.9647   1
   1  21   2 41.1483  6.9653   1
   1  21   2 23.1526  4.4624   5
  -1  21  -2 32.7778  3.4949   4
  -1  21  -2 24.6062  5.6435   1
   2 -21   2 15.5787  4.8840   1
   2 -21   2 9.08728 3.54874   5
  -2 -21  -2 10.1815  4.0226   1
  -2  21  -2 18.3919  5.0663   1
  -2  21  -2 8.45789 2.82902   4
   2  21   2 9.42916 4.38001   1
   2  21   2 8.83016 3.56152   5
   3 -21   2 5.44146 3.17215   5
  -3 -21  -2 7.14525 3.67688   1
   3 -21   2 2.97843 3.68349   1
   3  21   2 0.68967 2.69859   5
   3  21   2 5.61887 3.83898   1
  -3  21  -2 2.79093 3.68861   1
  -3  21  -2 2.01972 2.67603   4
   4 -21   2 11.0829  4.5633   1
  -4 -21  -2 10.3244  4.4286   1
   4  21   2 13.8304  4.9236   1
   4  21   2 1.13182 3.04184   5
  -4  21  -2 16.7859  5.2237   1
   5 -21   2 10.9333  4.5083   1
  -5 -21  -2 20.7357  5.4795   1
  -5 -21  -2 25.1260  6.0654   1
   5  21   2 16.1511  5.8020   1
  -5  21  -2 21.2056  5.6869   1
   5  21   2 22.6863  5.5430   5
  -6 -21  -2 15.7906  5.1243   1
   6 -21   2 9.82207 4.30774   1
   6  21   2 16.4567  5.9122   1
  -6  21  -2 16.4377  5.7328   1
   6  21   2 16.9856  5.4060   5
   7 -21   2 12.7636  5.1052   1
  -7 -21  -2 19.6754  6.3607   1
   7  21   2 25.9068  6.4869   5
  -7  21  -2 11.4912  5.4347   1
   7  21   2 16.9402  6.2597   1
  -8 -21  -2 107.314  12.453   1
   8 -21   2 107.525  12.560   1
  -8  21  -2 142.722  14.747   1
   8  21   2 119.052  13.296   1
  -9 -21  -2 -1.9661  3.2295   1
   9 -21   2 -2.6434  3.7719   1
   9  21   2 3.43949 5.02982   1
  -9  21  -2 9.85675 5.85174   1
  10 -21   2 9.95117 5.82534   1
 -10 -21  -2 2.17740 4.26516   1
 -10  21  -2 -0.8965  5.3571   1
  10  21   2 -4.7444  4.2280   1
  11 -21   2 3.56698 5.79281   1
 -11 -21  -2 13.4477  6.7320   1
 -11  21  -2 13.3299  6.9683   1
  11  21   2 10.7770  7.2079   1
 -11 -22   2 -0.4457  5.3885   1
 -11  22   2 4.06528 5.86447   1
  11  22  -2 -0.5511  6.9201   3
 -10 -22   2 56.2999 10.1940   1
 -10  22   2 63.9452 10.9835   1
  10  22  -2 49.8831 10.4077   3
  -9 -22   2 20.8893  6.9116   1
  -9  22   2 25.5823  7.3935   1
   9  22  -2 20.4689  7.7906   3
   9  22  -2 14.1259  5.9177   1
   8 -22  -2 89.8188 10.7060   1
  -8 -22   2 88.9150 11.5559   1
   8  22  -2 89.6658 11.3507   1
  -8  22   2 87.5761 11.6067   1
  -7 -22   2 0.06357 4.11675   1
  -7 -22   2 0.94453 3.89897   1
   7 -22  -2 -2.2777  3.7593   1
  -7  22   2 -1.0757  4.0224   1
   7  22  -2 4.54385 4.70643   5
   7  22  -2 2.04647 4.02767   1
   6 -22  -2 2.03483 3.76667   1
  -6 -22   2 12.2045  4.9449   1
  -6  22   2 4.32682 4.15243   1
   6  22  -2 6.54021 4.44002   5
   6  22  -2 2.17759 4.23355   1
   5 -22  -2 36.4690  6.9445   1
  -5 -22   2 25.4913  6.0771   1
  -5  22   2 24.4540  6.0780   1
   5  22  -2 13.6915  5.3175   1
   5  22  -2 22.9463  5.7822   5
   4 -22  -2 6.16544 3.93249   1
   4 -22  -2 -0.4470  1.9529   5
  -4 -22   2 3.02879 3.38223   1
   4  22  -2 5.23653 3.84342   1
   4  22  -2 2.49354 3.42467   5
  -4  22   2 6.10658 3.95353   1
   3 -22  -2 18.5225  3.5644   5
   3 -22  -2 26.6580  5.4348   1
  -3 -22   2 23.6643  5.4591   1
   3  22  -2 10.2735  4.2104   5
   3  22  -2 13.6615  4.9016   1
  -3  22   2 15.6833  4.8444   1
  -2 -22   2 105.104  10.585   1
   2 -22  -2 117.429   7.495   5
   2 -22  -2 131.251   9.862   1
   2  22  -2 113.735  11.072   1
  -2  22   2 116.985  11.299   1
   2  22  -2 118.688   9.863   5
   1 -22  -2 55.0872  7.2463   1
   1 -22  -2 51.2185  5.4487   5
  -1 -22   2 51.9099  7.1593   1
  -1  22   2 47.1182  7.5754   1
   1  22  -2 49.0111  7.3879   1
   0 -22  -2 31.2628  4.4925   5
   0 -22  -2 40.7972  6.3258   1
   0 -22   2 26.1222  5.7632   1
   0  22  -2 39.0762  6.6872   1
   0  22   2 35.0888  6.5105   1
  -1 -22  -2 29.8104  5.7076   1
   1 -22   2 19.2159  4.3853   5
   1 -22   2 20.0786  5.4252   1
   1  22   2 18.9461  5.5120   1
  -1  22  -2 21.5455  2.7654   4
  -1  22  -2 27.8859  5.7598   1
   1  22   2 19.4691  4.1869   5
  -2 -22  -2 -0.7007  2.9088   1
   2 -22   2 5.62442 3.76777   1
  -2  22  -2 8.00648 4.34437   1
  -2  22  -2 10.4110  2.9552   4
   2  22   2 9.51437 4.42612   1
   2  22   2 8.90527 3.58363   5
  -3 -22  -2 8.28560 4.34148   1
   3 -22   2 5.81581 4.04969   1
  -3  22  -2 -0.0305  3.1552   1
   3  22   2 12.2987  4.6906   1
   3  22   2 4.53156 3.44490   5
  -3  22  -2 8.28723 3.27668   4
   4 -22   2 17.4126  5.3081   1
  -4 -22  -2 20.5222  5.4790   1
  -4  22  -2 11.0750  4.8576   1
   4  22   2 16.2908  5.4843   1
   4  22   2 22.1420  5.4033   5
  -5 -22  -2 11.1153  4.8126   1
   5 -22   2 6.35753 4.93163   1
  -5 -22  -2 15.4320  5.2611   1
   5  22   2 7.90436 4.08773   5
   5  22   2 10.1052  4.9412   1
  -5  22  -2 15.1170  5.0616   1
   6 -22   2 0.12797 3.93826   1
  -6 -22  -2 2.69042 3.79909   1
   6  22   2 9.23198 4.34749   5
   6  22   2 2.99339 4.33356   1
  -6  22  -2 4.21303 4.40003   1
  -7 -22  -2 -1.8030  3.5411   1
   7 -22   2 0.82972 4.22183   1
  -7  22  -2 -1.2062  3.8671   1
   7  22   2 11.3667  5.4747   1
   7  22   2 -1.1644  3.6253   5
   8 -22   2 8.40394 5.29287   1
  -8 -22  -2 6.49445 4.93972   1
   8  22   2 1.81569 5.02050   1
  -8  22  -2 3.83940 5.02406   1
  -9 -22  -2 -3.2142  4.0244   1
   9 -22   2 1.15018 4.77734   1
   9  22   2 2.20724 5.09129   1
  -9  22  -2 -1.9961  4.4766   1
 -10 -22  -2 23.3810  7.4662   1
  10 -22   2 30.7881  8.0955   1
  10  22   2 17.4477  7.5215   1
 -10  22  -2 22.7120  7.9125   1
 -11 -22  -2 25.9915  8.0409   1
  11 -22   2 35.6358  8.9113   1
 -11  22  -2 21.1135  8.1675   1
  11  22   2 11.4995  7.2723   1
 -11 -23   2 7.77577 5.95237   1
  11  23  -2 -4.9779  6.0392   3
 -11  23   2 -3.2953  5.2050   1
 -10 -23   2 5.29866 5.48425   1
  10  23  -2 7.36811 6.79967   3
 -10  23   2 -4.7050  4.4699   1
  -9 -23   2 5.80159 5.62101   1
  -9  23   2 -2.1437  4.0460   1
   9  23  -2 5.03625 6.26375   3
   9  23  -2 5.45746 4.99755   1
   8 -23  -2 1.43270 4.32084   1
  -8 -23   2 5.89307 4.87207   1
  -8  23   2 3.80863 4.48103   1
   8  23  -2 -2.3436  4.1559   1
  -7 -23   2 111.100  12.309   1
  -7 -23   2 94.5553 11.5464   1
   7 -23  -2 119.956  12.307   1
  -7  23   2 127.425  13.634   1
   7  23  -2 139.587  13.664   1
   6 -23  -2 61.3094  8.7668   1
  -6 -23   2 55.8606  8.7803   1
   6  23  -2 58.3288  8.8760   1
  -6  23   2 43.9446  7.9764   1
   6  23  -2 40.4673  7.6709   5
  -5 -23   2 11.0750  4.7484   1
   5 -23  -2 23.6840  5.6752   1
  -5  23   2 9.06682 4.65513   1
   5  23  -2 7.09778 4.41044   1
   5  23  -2 16.4315  5.1752   5
  -4 -23   2 149.889  12.048   1
   4 -23  -2 184.941  12.535   1
  -4  23   2 183.837  13.160   1
   4  23  -2 170.062  12.751   5
   4  23  -2 179.191  13.028   1
   3 -23  -2 9.63216 4.32578   1
  -3 -23   2 -2.5084  2.5236   1
   3 -23  -2 2.66086 2.21143   5
  -3  23   2 2.12898 3.55468   1
   3  23  -2 -1.0864  3.2394   5
   3  23  -2 11.6128  4.5342   1
   2 -23  -2 98.0095  6.7090   5
   2 -23  -2 90.4220  9.4835   1
  -2 -23   2 74.3848  8.9880   1
  -2  23   2 58.0823  8.3282   1
   2  23  -2 87.1314  9.8342   1
   2  23  -2 77.6985  8.9906   5
  -1 -23   2 40.6583  6.8485   1
   1 -23  -2 42.7710  6.8471   1
   1 -23  -2 50.4312  5.6518   5
   1  23  -2 48.4817  7.4572   1
  -1  23   2 62.2631  8.2384   1
   0 -23  -2 20.2594  5.0193   1
   0 -23   2 8.22256 4.25717   1
   0  23  -2 13.7234  4.8563   1
   0  23   2 17.9728  5.4328   1
   1 -23   2 5.02424 3.68991   1
  -1 -23  -2 1.98407 2.86129   1
   1  23   2 -4.4353  3.1032   1
   1  23   2 2.41877 2.97469   5
  -1  23  -2 -0.9611  3.6923   1
  -2 -23  -2 67.7175  8.4789   1
   2 -23   2 57.0392  8.0344   1
   2  23   2 60.2148  8.6398   1
  -2  23  -2 64.3533  5.3537   4
  -2  23  -2 74.9472  9.0296   1
   2  23   2 60.7386  7.2135   5
   3 -23   2 3.04026 3.70432   1
  -3 -23  -2 -1.7823  3.3189   1
   3  23   2 4.05191 4.29315   1
  -3  23  -2 -2.5566  3.4599   1
   3  23   2 -0.5532  2.9662   5
  -3  23  -2 -1.3552  2.4540   4
   4 -23   2 4.54798 4.36383   1
  -4 -23  -2 6.34619 4.40501   1
  -4  23  -2 7.83641 4.65995   1
   4  23   2 6.53242 3.83080   5
   4  23   2 8.67058 4.71747   1
  -5 -23  -2 30.1935  6.6755   1
  -5 -23  -2 25.9854  6.3521   1
   5 -23   2 27.3632  6.6300   1
   5  23   2 25.1708  5.9235   5
   5  23   2 31.9090  7.0501   1
  -5  23  -2 34.4096  7.1665   1
  -6 -23  -2 3.86829 4.48206   1
   6 -23   2 4.00351 4.11682   1
   6  23   2 15.8227  5.3726   5
  -6  23  -2 6.94448 4.78721   1
   6  23   2 5.53442 4.85621   1
   7 -23   2 -4.5511  4.0142   1
  -7 -23  -2 3.94859 4.38464   1
  -7  23  -2 -0.4974  4.4136   1
   7  23   2 -1.9129  3.9677   1
   7  23   2 2.86782 4.55764   5
  -8 -23  -2 132.629  14.432   1
   8 -23   2 151.989  15.160   1
   8  23   2 149.558  15.369   1
  -8  23  -2 107.128  13.527   1
   9 -23   2 62.5968 10.4138   1
  -9 -23  -2 37.0656  8.6153   1
  -9  23  -2 34.6128  8.5096   1
   9  23   2 37.0215  8.6363   1
  10 -23   2 -3.4202  4.9119   1
 -10 -23  -2 3.78506 4.76133   1
  10  23   2 -1.5878  5.6435   1
 -10  23  -2 -1.4293  4.3701   1
 -11 -24   2 2.64198 5.44889   1
  11  24  -2 2.02393 7.11221   3
 -10 -24   2 1.12196 5.08318   1
 -10  24   2 -3.1189  4.6218   1
  10  24  -2 -8.1623  5.7313   3
  -9 -24   2 37.9985  8.6078   1
   9  24  -2 24.7933  8.5253   3
  -9  24   2 32.0777  8.4004   1
   9  24  -2 19.5185  7.4398   1
   8 -24  -2 -3.2156  3.9321   1
  -8 -24   2 4.37441 4.68262   1
  -8  24   2 2.64938 4.55422   1
   8  24  -2 0.89179 4.48221   1
   7 -24  -2 1.44685 4.35793   1
  -7 -24   2 1.24858 4.80424   1
  -7 -24   2 -2.7491  3.9840   1
  -7  24   2 5.30524 4.67371   1
   7  24  -2 0.79542 4.27513   1
  -6 -24   2 27.4901  6.9217   1
   6 -24  -2 20.4291  6.2033   1
   6  24  -2 12.5348  5.8764   5
   6  24  -2 23.3197  6.1812   1
  -6  24   2 25.5129  6.4897   1
   5 -24  -2 84.0717 10.1015   1
  -5 -24   2 75.0727  9.8619   1
   5  24  -2 83.8316 10.6218   1
   5  24  -2 81.2651 10.4256   5
  -5  24   2 67.1584  9.8316   1
  -4 -24   2 1.08857 4.01186   1
   4 -24  -2 2.18863 3.63726   1
   4  24  -2 12.3426  4.4526   1
   4  24  -2 0.91772 3.84206   5
  -4  24   2 0.24031 3.73690   1
  -3 -24   2 6.77614 3.97326   1
   3 -24  -2 12.0912  4.8608   1
   3  24  -2 8.04561 4.52933   1
  -3  24   2 7.52249 4.89531   1
   3  24  -2 9.51019 4.52175   5
  -2 -24   2 2.64547 3.37261   1
   2 -24  -2 1.72264 3.57252   1
   2  24  -2 0.31553 2.95512   5
  -2  24   2 -2.9935  2.8980   1
   2  24  -2 -3.4790  3.0710   1
   1 -24  -2 18.9142  5.1624   1
   1 -24  -2 18.8058  3.8409   5
  -1 -24   2 11.2672  4.7314   1
   1  24  -2 15.8463  5.3345   1
  -1  24   2 18.9726  5.4252   1
   0 -24  -2 1.78427 2.93168   1
   0 -24   2 1.73907 3.79142   1
   0  24  -2 3.33590 4.02493   1
   0  24   2 -0.5157  3.1998   1
  -1 -24  -2 32.7145  6.2757   1
   1 -24   2 23.4172  5.6625   1
   1  24   2 32.9164  5.4423   5
   1  24   2 34.9693  6.9629   1
  -1  24  -2 43.7168  7.5023   1
  -2 -24  -2 69.9242  8.9883   1
   2 -24   2 67.8269  9.1145   1
   2  24   2 72.6564  9.4681   1
  -2  24  -2 87.7753 10.3195   1
   2  24   2 84.0700  8.6417   5
  -3 -24  -2 15.5263  4.9935   1
   3 -24   2 13.1829  5.1667   1
  -3  24  -2 21.3311  5.8097   1
   3  24   2 28.0392  5.6093   5
   3  24   2 23.0110  6.0749   1
   4 -24   2 -1.2264  3.8096   1
  -4 -24  -2 6.26184 4.03422   1
   4  24   2 4.05917 3.80802   5
  -4  24  -2 -1.2905  2.9755   4
  -4  24  -2 -0.8633  3.9628   1
   4  24   2 2.08921 4.31335   1
   5 -24   2 4.33622 3.96425   1
  -5 -24  -2 -0.4837  3.3339   1
  -5 -24  -2 0.37439 3.49917   1
   5  24   2 1.75725 3.63785   5
   5  24   2 0.05786 4.22054   1
  -5  24  -2 2.33719 3.99174   1
  -6 -24  -2 86.9681 10.7884   1
   6 -24   2 72.5530 10.4588   1
   6  24   2 81.6320 10.5740   5
   6  24   2 97.3864 12.0683   1
  -6  24  -2 81.4691 10.9293   1
  -7 -24  -2 0.30788 4.01434   1
   7 -24   2 -1.1795  4.4304   1
  -7  24  -2 4.23358 4.80805   1
   7  24   2 1.52704 3.97693   1
   8 -24   2 6.51970 5.42662   1
  -8 -24  -2 3.94698 5.04668   1
  -8  24  -2 -5.7016  4.0379   1
   8  24   2 1.18909 4.58075   1
   9 -24   2 1.78132 5.59922   1
  -9 -24  -2 2.51182 4.83347   1
   9  24   2 -0.2021  5.3819   1
  -9  24  -2 6.30282 5.55044   1
  10 -24   2 11.8129  6.4258   1
 -10 -24  -2 5.74158 5.49442   1
 -10  24  -2 6.38958 5.98259   1
  10  24   2 15.2595  7.4360   1
 -10 -25   2 5.03880 5.82561   1
  10  25  -2 1.11246 6.96603   3
 -10  25   2 17.7486  7.3348   1
  -9 -25   2 0.31481 4.61862   1
   9  25  -2 3.87986 6.85216   3
  -9  25   2 0.64898 5.57151   1
  -8 -25   2 11.4745  5.8803   1
  -8  25   2 13.9071  6.4244   1
   8  25  -2 13.5286  6.4828   1
   7 -25  -2 64.7718  9.6177   1
  -7 -25   2 37.1769  7.9965   1
  -7 -25   2 29.3681  7.4536   1
  -7  25   2 51.5280  9.3035   1
   7  25  -2 53.2217  9.1812   1
  -6 -25   2 9.45641 5.02209   1
   6 -25  -2 1.79154 4.05717   1
  -6  25   2 3.69995 4.54289   1
   6  25  -2 2.77744 4.35333   1
  -5 -25   2 14.0382  5.3599   1
   5 -25  -2 21.3729  5.8926   1
  -5  25   2 16.9294  5.8324   1
   5  25  -2 14.2998  5.7002   1
   5  25  -2 22.2667  6.0553   5
  -4 -25   2 47.0581  7.7108   1
   4 -25  -2 37.4330  7.0870   1
  -4  25   2 44.9469  8.0998   1
   4  25  -2 34.6630  6.9800   5
   4  25  -2 45.3624  8.0843   1
  -3 -25   2 29.7614  6.6291   1
   3 -25  -2 25.5293  6.1753   1
   3  25  -2 40.3415  7.4051   1
   3  25  -2 31.9958  6.4843   5
  -3  25   2 31.2814  6.8607   1
  -2 -25   2 48.3613  7.7991   1
   2 -25  -2 46.0331  7.5895   1
   2  25  -2 44.3863  7.5897   1
  -2  25   2 61.2765  8.7932   1
   1 -25  -2 -1.7989  3.2140   1
  -1 -25   2 -0.6571  3.1805   1
  -1  25   2 -0.9843  3.6308   1
   1  25  -2 -2.9722  3.3193   1
   0 -25  -2 73.2825  8.9933   1
   0 -25   2 67.2923  9.1338   1
   0  25  -2 68.3830  9.4048   1
   0  25   2 73.1834  9.4560   1
   1 -25   2 195.757  13.933   1
  -1 -25  -2 226.819  14.137   1
  -1  25  -2 205.799  14.018   1
   1  25   2 233.395  15.150   1
   2 -25   2 -1.3544  3.0613   1
  -2 -25  -2 -1.9492  2.9034   1
  -2  25  -2 8.68852 4.91611   1
   2  25   2 6.12924 3.51709   5
   2  25   2 9.80522 4.93783   1
  -3 -25  -2 21.2858  5.7521   1
   3 -25   2 13.2976  4.9695   1
   3  25   2 15.2979  4.8797   5
  -3  25  -2 13.8323  5.5810   1
   3  25   2 8.36152 4.65469   1
   4 -25   2 -1.9942  3.6145   1
  -4 -25  -2 -2.4443  3.3269   1
   4  25   2 -2.5665  3.1601   5
   4  25   2 -6.5648  3.3747   1
  -4  25  -2 -0.5434  3.2742   1
  -5 -25  -2 13.3159  5.5128   1
  -5 -25  -2 11.5978  5.1221   1
   5 -25   2 13.9964  5.5860   1
   5  25   2 22.5607  5.8078   5
  -5  25  -2 22.6773  6.5889   1
   5  25   2 16.9117  6.0945   1
   6 -25   2 89.6930 11.7126   1
  -6 -25  -2 96.4211 11.7178   1
   6  25   2 99.0235 11.7198   5
  -6  25  -2 88.3497 11.6430   1
   6  25   2 78.0702 11.0552   1
  -7 -25  -2 40.7091  8.5235   1
   7 -25   2 64.8432 10.1851   1
  -7  25  -2 62.5301 10.3148   1
   7  25   2 34.2674  8.2890   1
   8 -25   2 7.34213 5.47971   1
  -8 -25  -2 1.71687 4.54910   1
   8  25   2 5.99313 5.70765   1
  -8  25  -2 1.44306 5.12240   1
   9 -25   2 -3.3151  4.6851   1
  -9 -25  -2 4.40678 5.10510   1
  -9  25  -2 11.0874  6.1202   1
   9  25   2 8.65360 6.67002   1
 -10 -25  -2 6.99474 5.32113   1
  10 -25   2 -5.4785  5.1096   1
  10  25   2 -6.3123  5.2432   1
 -10  25  -2 -1.9655  5.1589   1
 -10 -26   2 -4.0206  4.4420   1
 -10  26   2 10.7514  6.4623   1
  10  26  -2 4.30765 7.42660   3
  -9 -26   2 38.4310  9.0517   1
   9  26  -2 33.0451  9.3520   3
  -9  26   2 28.2010  8.1791   1
  -8 -26   2 0.16085 4.51305   1
  -8  26   2 -2.0908  4.2305   1
   8  26  -2 -1.0365  4.8179   1
  -7 -26   2 2.25964 4.83838   1
   7 -26  -2 -2.0952  4.0325   1
  -7 -26   2 -0.9927  4.2975   1
   7  26  -2 -4.2926  4.2978   1
  -7  26   2 -2.9923  4.2093   1
   6 -26  -2 286.245  17.461   1
  -6 -26   2 265.297  17.555   1
  -6  26   2 266.134  18.104   1
   6  26  -2 282.544  17.822   1
  -5 -26   2 78.9340 10.7175   1
   5 -26  -2 63.3938  9.3127   1
   5  26  -2 74.7674 10.3563   1
   5  26  -2 74.7331 10.3406   5
  -5  26   2 79.9943 10.8956   1
  -4 -26   2 -0.6621  3.6400   1
   4 -26  -2 -0.3771  3.9121   1
   4  26  -2 -0.5009  3.7155   1
  -4  26   2 0.35231 3.73493   1
   4  26  -2 3.06022 3.99169   5
  -3 -26   2 1.68377 3.88768   1
   3 -26  -2 2.56420 4.19808   1
   3  26  -2 5.53532 4.11418   5
  -3  26   2 4.33976 4.52243   1
   3  26  -2 -1.4145  3.4257   1
  -2 -26   2 21.2257  5.6420   1
   2 -26  -2 17.3416  5.4483   1
  -2  26   2 21.1676  5.6557   1
   2  26  -2 12.6172  5.1423   1
   1 -26  -2 0.26543 3.22452   1
  -1 -26   2 7.21906 4.01883   1
   1  26  -2 -2.3947  3.4823   1
  -1  26   2 -0.3573  3.6674   1
   0 -26  -2 9.66716 4.26209   1
   0 -26   2 2.98415 3.82098   1
   0  26  -2 -0.9454  3.7367   1
   0  26   2 8.99599 4.61967   1
   1 -26   2 122.184  12.289   1
  -1 -26  -2 125.305  12.167   1
  -1  26  -2 135.971  12.964   1
   1  26   2 123.654  12.712   1
  -2 -26  -2 156.536  12.030   1
   2 -26   2 149.889  12.103   1
   2  26   2 145.807  14.037   1
   2  26   2 152.876  10.935   5
  -2  26  -2 151.807  12.468   1
  -3 -26  -2 45.4945  7.7917   1
   3 -26   2 48.7395  8.1980   1
   3  26   2 38.9174  6.6965   5
  -3  26  -2 58.4999  9.0341   1
   3  26   2 45.0865  8.0034   1
  -4 -26  -2 10.8783  5.0928   1
   4 -26   2 3.96882 3.93606   1
  -4  26  -2 1.67294 4.05681   1
   4  26   2 3.70130 3.77418   5
   4  26   2 3.23785 4.55633   1
  -5 -26  -2 2.95550 4.29307   1
  -5 -26  -2 5.28510 4.55640   1
   5 -26   2 6.52182 4.18065   1
   5  26   2 8.40930 4.45873   5
   5  26   2 5.01125 4.79709   1
  -5  26  -2 3.91150 4.73345   1
   6 -26   2 11.1209  5.5785   1
  -6 -26  -2 14.1786  5.3291   1
  -6  26  -2 2.43436 5.02727   1
   6  26   2 13.6886  5.7824   5
   6  26   2 4.44882 5.41633   1
   7 -26   2 46.6277  9.1385   1
  -7 -26  -2 45.9455  8.7853   1
   7  26   2 73.2383 11.2551   1
  -7  26  -2 54.6510  9.9454   1
   8 -26   2 3.55709 4.80108   1
  -8 -26  -2 -4.3804  3.7345   1
  -8  26  -2 4.84840 4.92502   1
   8  26   2 4.56180 5.30637   1
  -9 -26  -2 68.3176 11.4103   1
   9 -26   2 67.9875 11.3411   1
  -9  26  -2 67.4670 11.5789   1
   9  26   2 58.8719 10.9406   1
  -9 -27   2 11.2084  6.4232   1
  -9  27   2 1.92757 5.65437   1
   9  27  -2 12.2041  7.8689   3
  -8 -27   2 20.2911  7.0108   1
   8  27  -2 17.1002  7.0080   1
  -8  27   2 20.6282  7.2523   1
   7 -27  -2 46.2035  8.4175   1
  -7 -27   2 33.6449  8.1225   1
  -7 -27   2 24.7702  7.3902   1
   7  27  -2 41.5651  8.8684   1
  -7  27   2 25.8999  7.3143   1
   6 -27  -2 18.3023  5.9893   1
  -6 -27   2 24.6588  7.1223   1
  -6  27   2 5.23602 4.99914   1
   6  27  -2 18.6427  6.4521   1
  -5 -27   2 95.5590 11.5950   1
   5 -27  -2 121.741  12.531   1
   5  27  -2 112.699  12.664   1
  -5  27   2 108.531  12.719   1
  -4 -27   2 94.5808 11.4083   1
   4 -27  -2 94.2202 10.8877   1
  -4  27   2 88.5911 11.4078   1
   4  27  -2 96.0761 11.5317   1
   4  27  -2 81.9867 10.6349   5
   3 -27  -2 -3.2751  3.2610   1
  -3 -27   2 -0.0467  3.7858   1
  -3  27   2 2.15776 3.96308   1
   3  27  -2 3.21162 4.16883   1
   3  27  -2 4.85968 4.23052   5
   2 -27  -2 17.6299  5.5415   1
  -2 -27   2 25.2304  6.3150   1
   2  27  -2 19.4345  6.0949   1
  -2  27   2 14.8589  5.5210   1
   1 -27  -2 85.9617 10.2669   1
  -1 -27   2 64.0323  9.1915   1
  -1  27   2 59.8864  9.2820   1
   1  27  -2 73.1431  9.6603   1
   0 -27   2 53.9766  8.3934   1
   0 -27  -2 62.5190  8.6775   1
   0  27   2 56.6281  9.2063   1
   0  27  -2 53.1198  8.4525   1
   1 -27   2 -3.5258  3.5622   1
  -1 -27  -2 -2.6274  3.3360   1
  -1  27  -2 -1.0859  3.4985   1
   1  27   2 0.18548 4.48413   1
   2 -27   2 4.12232 4.31461   1
  -2 -27  -2 2.65265 3.86653   1
   2  27   2 -1.4848  3.2942   5
  -2  27  -2 -0.4580  3.8138   1
   2  27   2 15.5059  5.9748   1
   3 -27   2 7.92033 4.57063   1
  -3 -27  -2 0.91234 3.81674   1
   3  27   2 1.92634 4.36097   1
  -3  27  -2 -2.7775  3.7920   1
   3  27   2 -1.8024  3.3171   5
  -4 -27  -2 1.04375 4.12203   1
   4 -27   2 -3.4621  3.9688   1
   4  27   2 1.29129 4.14097   1
  -4  27  -2 -4.6555  4.0404   1
   4  27   2 3.55045 4.19097   5
  -5 -27  -2 21.4858  6.4718   1
   5 -27   2 31.8650  7.6351   1
  -5 -27  -2 26.9838  6.8739   1
   5  27   2 29.3439  8.0563   1
   5  27   2 25.3914  6.6731   5
  -5  27  -2 33.0862  7.9519   1
   6 -27   2 -4.4812  3.8574   1
  -6 -27  -2 9.62698 4.44866   1
   6  27   2 -0.4746  4.7284   1
  -6  27  -2 -4.0854  4.4495   1
  -7 -27  -2 54.1848  9.8417   1
   7 -27   2 46.8455  9.1130   1
  -7  27  -2 46.6254  9.5184   1
   7  27   2 53.3603 10.1186   1
   8 -27   2 116.717  14.329   1
  -8 -27  -2 98.5736 13.2324   1
   8  27   2 92.9738 13.6304   1
  -8  27  -2 115.462  14.488   1
   9 -27   2 38.8712  9.5669   1
  -9 -27  -2 29.1243  8.0361   1
  -9  27  -2 59.1227 11.1400   1
   9  27   2 50.0915 10.4293   1
  -9 -28   2 5.69323 6.08279   1
  -9  28   2 1.83993 5.54780   1
   9  28  -2 4.67649 8.04190   3
  -8 -28   2 3.65316 4.98661   1
  -8  28   2 -1.0910  4.9994   1
  -7 -28   2 22.1526  7.5339   1
  -7 -28   2 19.6923  7.0833   1
  -7  28   2 15.2681  6.3714   1
   7  28  -2 9.57113 6.02672   1
  -6 -28   2 41.1460  8.8582   1
   6 -28  -2 40.0646  8.1069   1
   6  28  -2 17.5175  6.3475   1
  -6  28   2 34.6643  8.1972   1
   5 -28  -2 151.790  14.399   1
  -5 -28   2 94.4072 12.1956   1
   5  28  -2 139.721  14.476   1
  -5  28   2 126.849  14.233   1
  -4 -28   2 46.7549  8.3531   1
   4 -28  -2 42.1038  7.8691   1
   4  28  -2 31.9311  7.2118   5
  -4  28   2 35.5653  8.0562   1
   4  28  -2 39.5682  8.2093   1
   3 -28  -2 5.89072 4.18085   1
  -3 -28   2 5.09173 4.48096   1
   3  28  -2 1.98652 4.34213   1
  -3  28   2 -1.8537  4.0780   1
   3  28  -2 -1.9453  3.3361   5
   2 -28  -2 7.34700 4.33512   1
  -2 -28   2 4.80891 4.60534   1
   2  28  -2 4.69315 4.59248   1
  -2  28   2 1.26388 4.63870   1
   1 -28  -2 55.5765  8.4933   1
  -1 -28   2 70.9423  9.8889   1
   1  28  -2 45.3325  8.5903   1
  -1  28   2 53.3994  9.0804   1
   0 -28  -2 -3.5465  3.0955   1
   0 -28   2 -3.4419  3.3281   1
   0  28   2 1.12210 4.00561   1
   0  28  -2 -3.7817  3.3963   1
  -1 -28  -2 157.673  12.491   1
   1 -28   2 158.910  12.741   1
   1  28   2 140.746  14.548   1
  -1  28  -2 163.289  13.213   1
  -2 -28  -2 34.7944  6.9516   1
   2 -28   2 36.1799  7.5424   1
   2  28   2 20.4361  6.4996   1
   2  28   2 21.7616  5.3675   5
  -2  28  -2 21.1152  6.3320   1
  -3 -28  -2 16.6140  5.9963   1
   3 -28   2 17.9549  6.1829   1
   3  28   2 31.9054  6.5483   5
  -3  28  -2 24.0584  6.7820   1
   3  28   2 19.7494  6.0265   1
   4 -28   2 -0.1891  4.2010   1
  -4 -28  -2 -1.0539  4.0015   1
   4  28   2 1.85078 4.79447   1
  -4  28  -2 -0.7642  4.3026   1
   4  28   2 2.55242 4.37006   5
  -5 -28  -2 0.04684 3.45296   1
  -5 -28  -2 -1.9306  3.6394   1
   5 -28   2 1.36161 4.52517   1
   5  28   2 1.10276 4.25731   5
  -5  28  -2 0.52118 4.32814   1
   5  28   2 1.54328 5.29208   1
   6 -28   2 168.733  14.057   1
  -6 -28  -2 156.518  13.245   1
  -6  28  -2 152.875  15.845   1
   6  28   2 170.495  17.102   1
  -7 -28  -2 2.87496 5.00412   1
   7 -28   2 -0.9145  4.3569   1
   7  28   2 1.45782 6.05252   1
  -7  28  -2 -5.1580  4.3043   1
  -8 -28  -2 3.89905 4.96875   1
   8 -28   2 12.3661  6.0059   1
   8  28   2 9.50619 6.07528   1
  -8  28  -2 7.34897 6.00433   1
  -9 -28  -2 14.1356  7.1352   1
   9 -28   2 12.9974  6.8329   1
   9  28   2 7.77068 6.98013   1
  -9  28  -2 12.1895  6.9294   1
  -9 -29   2 1.15873 5.60254   1
  -9  29   2 -0.2207  4.8166   1
   9  29  -2 -0.5943  7.0553   3
  -8 -29   2 3.07942 4.96072   1
  -8  29   2 -1.2623  4.9028   1
  -7 -29   2 27.6512  7.8329   1
  -7 -29   2 15.9997  6.4720   1
   7  29  -2 25.2444  7.5679   1
  -7  29   2 14.7469  6.7661   1
  -6 -29   2 5.22040 4.94121   1
   6 -29  -2 1.56382 4.67465   1
   6  29  -2 -0.8689  4.4927   1
  -6  29   2 -5.0878  3.8678   1
   5 -29  -2 15.0360  5.9461   1
  -5 -29   2 35.0752  7.9996   1
  -5  29   2 41.6090  8.7027   1
   5  29  -2 40.4423  8.4198   1
  -4 -29   2 -0.4088  4.0180   1
   4 -29  -2 -0.4253  4.0954   1
  -4  29   2 6.01559 5.11993   1
   4  29  -2 4.84008 4.90605   1
  -3 -29   2 118.417  12.936   1
   3 -29  -2 114.458  12.256   1
  -3  29   2 110.256  12.800   1
   3  29  -2 89.0764 11.6832   1
  -2 -29   2 0.13184 3.75615   1
   2 -29  -2 2.15901 3.96552   1
   2  29  -2 2.07319 4.35703   1
  -2  29   2 1.48928 4.60833   1
   1 -29  -2 7.78224 4.50803   1
  -1 -29   2 1.62343 4.25734   1
  -1  29   2 11.6721  5.0203   1
   1  29  -2 7.97741 4.56534   1
   0 -29   2 3.74615 4.36842   1
   0 -29  -2 -0.4506  3.3917   1
   0  29  -2 -0.0963  4.3456   1
   0  29   2 5.18761 5.11428   1
   1 -29   2 192.074  14.846   1
  -1 -29  -2 217.016  15.034   1
  -1  29  -2 233.460  16.135   1
   1  29   2 235.787  16.333   1
   2 -29   2 195.649  14.863   1
  -2 -29  -2 173.852  13.633   1
   2  29   2 160.627  15.949   1
  -2  29  -2 192.924  14.769   1
  -3 -29  -2 -1.0198  3.6756   1
   3 -29   2 -0.3032  4.2128   1
  -3  29  -2 0.93723 4.07064   1
   3  29   2 -2.0482  4.0586   1
   3  29   2 5.51024 4.29353   5
   4 -29   2 6.91894 5.29422   1
  -4 -29  -2 5.96148 4.98815   1
  -4  29  -2 11.2867  5.7323   1
   4  29   2 13.1434  6.0888   1
   4  29   2 9.58278 5.06825   5
  -5 -29  -2 20.6060  6.4818   1
   5 -29   2 24.0505  6.9829   1
  -5 -29  -2 25.2745  7.1052   1
   5  29   2 32.0018  7.6397   5
  -5  29  -2 27.0329  7.5372   1
   5  29   2 29.2196  8.1889   1
  -6 -29  -2 23.8185  6.1086   1
   6 -29   2 12.5547  6.1582   1
  -6  29  -2 8.33457 6.05207   1
   6  29   2 13.3366  6.9383   1
  -7 -29  -2 34.3413  8.2087   1
   7 -29   2 80.6818 12.0384   1
  -7  29  -2 101.767  13.778   1
   7  29   2 70.6929 11.3071   1
   8 -29   2 59.5004 10.8131   1
  -8 -29  -2 48.4342  9.9997   1
   8  29   2 60.9638 11.5038   1
  -8  29  -2 68.6923 11.9656   1
  -8 -30   2 2.83166 4.83198   1
  -8  30   2 0.53696 5.57936   1
  -7 -30   2 32.3379  8.5222   1
  -7 -30   2 28.0706  8.0529   1
  -7  30   2 14.3493  7.1963   1
   7  30  -2 26.2904  7.6452   1
   6 -30  -2 2.47782 5.09915   1
  -6 -30   2 -2.9889  4.1960   1
  -6  30   2 5.97536 5.76100   1
   6  30  -2 -2.2177  4.9027   1
  -5 -30   2 1.49953 4.30687   1
   5 -30  -2 -4.8839  4.1111   1
   5  30  -2 4.72863 4.92023   1
  -5  30   2 0.48835 4.48463   1
  -4 -30   2 3.56918 4.73791   1
   4 -30  -2 -4.5671  3.6109   1
   4  30  -2 -4.8479  4.1085   1
  -4  30   2 -1.0296  4.7327   1
   3 -30  -2 4.52185 4.52288   1
  -3 -30   2 3.39806 4.42771   1
   3  30  -2 -3.3477  3.5678   1
  -3  30   2 -6.4551  3.4816   1
   2 -30  -2 62.1939  9.1991   1
  -2 -30   2 56.1095  9.5456   1
  -2  30   2 51.4067  9.0045   1
   2  30  -2 43.5327  8.8643   1
  -1 -30   2 11.7475  5.4261   1
   1 -30  -2 8.44955 4.78416   1
  -1  30   2 19.7158  6.5067   1
   1  30  -2 15.3885  6.3643   1
   0 -30  -2 -3.7070  3.2618   1
   0 -30   2 1.68016 4.10323   1
   0  30   2 3.31034 4.95973   1
   0  30  -2 0.06772 4.23088   1
  -1 -30  -2 6.52011 4.58460   1
   1 -30   2 5.45983 5.01146   1
   1  30   2 -0.0888  4.6780   1
  -1  30  -2 -4.8819  3.9976   1
   2 -30   2 12.8083  5.6726   1
  -2 -30  -2 -4.7560  3.6227   1
  -2  30  -2 5.47806 5.25383   1
   2  30   2 6.30983 5.41493   1
   3 -30   2 58.3728  9.4664   1
  -3 -30  -2 47.7217  8.7619   1
  -3  30  -2 54.9684  9.8218   1
   3  30   2 45.7900  9.5374   1
  -4 -30  -2 -1.1912  4.2457   1
   4 -30   2 -0.4006  4.6726   1
  -4  30  -2 1.83503 5.03466   1
   4  30   2 -3.7967  4.3098   1
  -5 -30  -2 9.53149 5.54047   1
  -5 -30  -2 5.43383 4.86825   1
   5 -30   2 -2.0157  4.8231   1
   5  30   2 9.47566 5.75917   1
  -5  30  -2 -2.1893  4.7729   1
   6 -30   2 29.3005  8.3510   1
  -6 -30  -2 41.5848  7.5739   1
  -6  30  -2 25.6663  7.8868   1
   6  30   2 43.2000  9.6954   1
  -7 -30  -2 1.02243 4.79022   1
   7 -30   2 16.3338  7.0097   1
   7  30   2 4.84755 5.69461   1
  -7  30  -2 13.5009  6.9751   1
   8 -30   2 5.06236 5.86882   1
  -8 -30  -2 0.43969 5.23184   1
   8  30   2 8.39179 6.79540   1
  -8  30  -2 3.80949 6.61942   1
  -8 -31   2 19.7757  7.2101   1
  -7 -31   2 9.11720 6.11191   1
  -7 -31   2 12.3356  6.1663   1
  -7  31   2 19.5751  7.4769   1
  -6 -31   2 5.15222 5.30813   1
  -6  31   2 4.54525 5.68944   1
   6  31  -2 -4.9324  4.2954   1
   5 -31  -2 1.22406 4.76023   1
  -5 -31   2 5.82224 5.10269   1
  -5  31   2 12.5197  6.2148   1
   5  31  -2 -0.0474  4.9852   1
  -4 -31   2 3.35736 4.82854   1
   4 -31  -2 7.84984 5.10060   1
  -4  31   2 11.7858  6.0174   1
   4  31  -2 7.12453 4.97850   1
   3 -31  -2 34.0483  7.4002   1
  -3 -31   2 24.3791  6.8682   1
  -3  31   2 21.1711  7.2410   1
   3  31  -2 36.2575  8.1185   1
   2 -31  -2 14.0904  5.8590   1
  -2 -31   2 14.9713  6.0374   1
   2  31  -2 16.3890  6.7540   1
  -2  31   2 27.9630  7.9099   1
   1 -31  -2 0.51046 4.32567   1
  -1 -31   2 16.4246  6.0391   1
   1  31  -2 5.88574 5.44198   1
  -1  31   2 1.87583 4.98143   1
   0 -31  -2 49.5944  8.8206   1
   0 -31   2 47.4416  8.7596   1
   0  31  -2 54.7761  9.3860   1
   0  31   2 28.7708  8.0951   1
  -1 -31  -2 3.78757 4.25961   1
   1 -31   2 2.08043 4.73278   1
   1  31   2 7.76368 5.46446   1
  -1  31  -2 -1.8636  4.1889   1
   2 -31   2 6.74459 5.41525   1
  -2 -31  -2 23.7411  6.9968   1
  -2  31  -2 20.2858  6.4601   1
   2  31   2 13.6700  6.1679   1
   3 -31   2 -0.4681  4.1795   1
  -3 -31  -2 -0.2521  4.2038   1
   3  31   2 -1.6231  4.5063   1
  -3  31  -2 -4.2739  4.0132   1
   4 -31   2 0.48607 4.98775   1
  -4 -31  -2 2.83317 4.53366   1
  -4  31  -2 1.68520 5.02362   1
   4  31   2 1.46893 4.81883   1
  -5 -31  -2 -4.5787  4.3314   1
  -5 -31  -2 3.31958 5.19038   1
   5 -31   2 -0.8906  4.9948   1
  -5  31  -2 5.84912 5.89880   1
   5  31   2 5.21473 5.69654   1
   6 -31   2 0.67732 5.20521   1
  -6 -31  -2 12.9782  4.8693   1
  -6  31  -2 -0.7724  4.7727   1
   6  31   2 -4.4561  4.9243   1
   7 -31   2 -5.1778  4.9619   1
  -7 -31  -2 2.69599 5.30444   1
  -7  31  -2 1.81193 5.87121   1
   7  31   2 3.63670 5.76786   1
  -7 -32   2 13.0077  6.5754   1
  -7 -32   2 14.9773  7.6570   1
  -7  32   2 8.31424 5.83510   1
  -6 -32   2 10.9610  6.0913   1
  -6  32   2 23.8068  8.1555   1
   6  32  -2 22.8538  7.5222   1
   5 -32  -2 -2.5365  4.3931   1
  -5 -32   2 -4.3179  4.0685   1
  -5  32   2 3.47455 3.90141   1
   5  32  -2 9.18874 6.56999   1
  -4 -32   2 43.9698  9.2195   1
   4 -32  -2 31.7089  7.8745   1
   4  32  -2 34.1704  8.7090   1
  -4  32   2 42.4032  9.3184   1
   3 -32  -2 -1.8042  4.0805   1
  -3 -32   2 5.38516 5.40203   1
  -3  32   2 8.46478 5.79437   1
   3  32  -2 3.92416 5.18638   1
  -2 -32   2 14.9991  6.1592   1
   2 -32  -2 15.0762  5.8212   1
  -2  32   2 18.2445  6.3154   1
   2  32  -2 15.1095  6.6507   1
   1 -32  -2 -4.8711  3.8016   1
  -1 -32   2 -1.3732  4.3328   1
   1  32  -2 2.05613 4.81746   1
  -1  32   2 -0.5383  5.1236   1
   0 -32   2 69.9496 10.6558   1
   0 -32  -2 58.3794  9.4584   1
   0  32   2 63.8556 10.2574   1
   0  32  -2 92.8901 12.3307   1
  -1 -32  -2 37.1042  7.9529   1
   1 -32   2 38.9132  8.5375   1
  -1  32  -2 58.2124 10.0411   1
   1  32   2 47.5947  9.3736   1
   2 -32   2 3.25231 4.85087   1
  -2 -32  -2 6.78769 5.24299   1
  -2  32  -2 6.23373 5.56943   1
   2  32   2 -1.0111  4.9484   1
   3 -32   2 7.81460 5.44532   1
  -3 -32  -2 12.9486  5.7927   1
   3  32   2 7.69090 5.37904   1
  -3  32  -2 0.34372 4.83962   1
  -4 -32  -2 3.80184 4.72490   1
   4 -32   2 1.64431 5.17046   1
  -4  32  -2 3.23910 5.69038   1
   4  32   2 -1.1630  4.5467   1
  -5 -32  -2 -1.6636  3.9626   1
  -5 -32  -2 4.58953 5.05656   1
   5 -32   2 12.7825  5.9162   1
   5  32   2 0.20438 5.33121   1
  -5  32  -2 6.72966 5.13880   1
   6 -32   2 3.70063 5.36160   1
  -6 -32  -2 11.5245  4.9770   1
  -6  32  -2 -5.0746  4.8757   1
   6  32   2 -2.2716  5.5550   1
  -7 -32  -2 7.61814 6.07118   1
   7 -32   2 19.6326  7.5282   1
   7  32   2 25.8123  8.5649   1
  -7  32  -2 15.9911  7.5865   1
  -6 -33   2 18.4050  7.1724   1
  -6  33   2 14.2838  7.2369   1
   6  33  -2 12.5182  6.6923   1
  -5 -33   2 74.1100 11.5033   1
   5  33  -2 60.6376 11.1689   1
  -5  33   2 53.6336 10.7621   1
  -4 -33   2 10.6667  6.0943   1
   4 -33  -2 11.4963  5.7366   1
   4  33  -2 7.45807 5.90111   1
  -4  33   2 4.11162 4.83069   1
  -3 -33   2 2.04158 5.24502   1
   3 -33  -2 -5.6478  3.8787   1
  -3  33   2 -3.7392  4.9443   1
   3  33  -2 -5.1058  4.6872   1
  -2 -33   2 17.8471  6.4696   1
   2 -33  -2 14.8819  5.9012   1
  -2  33   2 12.7339  6.6838   1
   2  33  -2 9.17523 5.71034   1
  -1 -33   2 0.61405 4.56290   1
   1 -33  -2 7.71388 4.98147   1
  -1  33   2 1.08828 4.97387   1
   1  33  -2 0.55214 4.59684   1
   0 -33  -2 42.2703  8.9562   1
   0 -33   2 56.7410 10.1776   1
   0  33  -2 79.9192 11.6552   1
   0  33   2 59.9266 10.6286   1
  -1 -33  -2 1.63953 4.88172   1
   1 -33   2 11.1198  5.5785   1
   1  33   2 14.5213  6.6930   1
  -1  33  -2 5.46451 5.84421   1
   2 -33   2 -0.0674  4.5712   1
  -2 -33  -2 -1.3198  4.5223   1
   2  33   2 -4.1781  4.8466   1
  -2  33  -2 -1.1659  4.5354   1
   3 -33   2 -1.8698  5.0802   1
  -3 -33  -2 0.50128 3.88721   1
   3  33   2 1.57987 4.76387   1
  -3  33  -2 2.64883 4.98684   1
   4 -33   2 34.9537  8.8473   1
  -4 -33  -2 22.8040  6.8785   1
  -4 -33  -2 20.3999  7.0510   1
  -4  33  -2 6.50569 6.23034   1
   4  33   2 6.44099 6.27147   1
  -5 -33  -2 4.71933 5.29363   1
  -5 -33  -2 4.79178 5.29789   1
   5 -33   2 1.96798 5.55375   1
   5  33   2 -2.2425  5.7488   1
  -5  33  -2 -4.3782  4.9094   1
  -6 -33  -2 38.0169  8.3708   1
   6 -33   2 14.3172  7.1439   1
  -6  33  -2 25.0374  8.3700   1
   6  33   2 10.3794  6.8528   1
  -5 -34   2 5.62266 6.01255   1
   5  34  -2 2.77443 6.33755   1
  -5  34   2 4.29316 6.29675   1
  -4 -34   2 97.5625 13.3036   1
  -4  34   2 98.3549 13.9714   1
   4  34  -2 125.497  15.003   1
  -3 -34   2 1.31599 4.92192   1
   3 -34  -2 21.7668  7.1398   1
   3  34  -2 2.89525 5.68078   1
  -3  34   2 12.0462  6.5994   1
   2 -34  -2 14.1790  6.2139   1
  -2 -34   2 22.5610  7.2708   1
  -2  34   2 20.8825  7.2486   1
   2  34  -2 5.74783 5.61081   1
   1 -34  -2 7.16543 5.52605   1
  -1 -34   2 -0.4346  4.5348   1
  -1  34   2 -1.9329  5.3248   1
   1  34  -2 10.2343  6.3795   1
   0 -34  -2 7.84347 5.53822   1
   0 -34   2 15.2334  6.7222   1
   0  34  -2 16.9237  6.8207   1
   0  34   2 9.47540 6.34999   1
  -1 -34  -2 5.74211 4.72237   1
   1 -34   2 1.61754 4.98959   1
  -1  34  -2 5.27099 5.66951   1
   1  34   2 9.34780 6.26455   1
   2 -34   2 8.86850 6.25987   1
  -2 -34  -2 0.29620 4.76273   1
   2  34   2 1.77406 5.19001   1
  -2  34  -2 -6.2047  4.5276   1
   3 -34   2 -3.3221  4.2506   1
  -3 -34  -2 6.92449 5.46108   1
  -3  34  -2 -2.9973  4.8041   1
   3  34   2 -0.1486  4.7540   1
   4 -34   2 1.91188 5.20819   1
  -4 -34  -2 -3.3844  3.8615   1
  -4 -34  -2 -0.0852  4.8234   1
   4  34   2 0.11387 5.32457   1
  -4  34  -2 0.00933 4.86446   1
  -5 -34  -2 -1.3356  4.5858   1
  -5 -34  -2 -1.7351  5.0477   1
   5 -34   2 -7.0428  4.6930   1
  -5  34  -2 -5.8444  5.2861   1
   5  34   2 2.02663 5.80965   1
  -4 -35   2 6.46671 5.70972   1
   4  35  -2 3.98446 5.89070   1
  -4  35   2 -0.3895  5.5158   1
   3 -35  -2 52.4472  9.7222   1
  -3 -35   2 58.9118 10.6318   1
   3  35  -2 75.8424 12.5834   1
  -3  35   2 51.9564 10.5662   1
  -2 -35   2 7.16931 5.92128   1
   2 -35  -2 12.0122  6.3126   1
  -2  35   2 6.29506 6.15962   1
   2  35  -2 6.43702 5.90279   1
   1 -35  -2 5.64391 5.36613   1
  -1 -35   2 -1.6614  4.7217   1
   1  35  -2 3.79298 5.50740   1
  -1  35   2 10.0322  6.6401   1
   0 -35  -2 17.2508  6.8992   1
   0 -35   2 22.5520  7.5622   1
   0  35  -2 12.6267  6.8931   1
   0  35   2 29.1982  8.4122   1
   1 -35   2 12.9390  6.5371   1
  -1 -35  -2 15.3437  6.6510   1
   1  35   2 5.16370 5.87619   1
  -1  35  -2 24.3567  7.8928   1
  -2 -35  -2 16.9866  6.7260   1
   2 -35   2 30.5134  8.0432   1
  -2  35  -2 24.2049  7.5680   1
   2  35   2 32.9123  9.2664   1
   3 -35   2 17.9101  7.2748   1
  -3 -35  -2 21.2802  7.3360   1
   3  35   2 1.78500 5.31799   1
  -3  35  -2 -1.3738  4.9592   1
  -4 -35  -2 -2.0991  4.7610   1
   4 -35   2 1.36953 5.87862   1
  -4 -35  -2 -3.1957  4.5607   1
   4  35   2 6.54337 6.08584   1
  -4  35  -2 -5.5406  4.7558   1
  -3 -36   2 5.96393 5.67308   1
   3  36  -2 2.61852 6.31446   1
  -3  36   2 2.39507 5.84964   1
   2 -36  -2 -4.8766  4.5511   1
  -2 -36   2 -2.7911  4.1567   1
  -2  36   2 -4.6372  5.2672   1
   2  36  -2 -7.2805  4.3249   1
  -1 -36   2 11.0682  6.4546   1
   1 -36  -2 17.1384  6.8269   1
   1  36  -2 23.1070  8.2390   1
  -1  36   2 25.4513  8.5236   1
   0 -36  -2 4.17195 5.55176   1
   0 -36   2 7.95996 6.17603   1
   0  36   2 6.93148 6.64730   1
   0  36  -2 3.98743 6.14224   1
   1 -36   2 0.86802 4.73030   1
  -1 -36  -2 -1.1126  4.5815   1
  -1  36  -2 -0.5336  5.0028   1
   1  36   2 -6.3756  4.8698   1
  -2 -36  -2 6.50015 5.68935   1
   2 -36   2 5.43746 5.89804   1
   2  36   2 7.84418 6.42542   1
  -2  36  -2 -1.0793  5.3209   1
   3 -36   2 11.8203  6.8597   1
  -3 -36  -2 11.9685  6.2092   1
  -3  36  -2 8.06521 6.82225   1
   3  36   2 6.92944 6.17636   1
   1 -37  -2 5.98986 5.70278   1
  -1 -37   2 -0.1014  5.3101   1
   1  37  -2 -3.5443  4.9387   1
  -1  37   2 -7.0533  4.6687   1
   0 -37   2 7.84957 6.11778   1
   0 -37  -2 9.26410 6.58572   1
   0  37  -2 13.6145  6.9859   1
   0  37   2 4.17020 5.77018   1
  -1  37  -2 25.8748  8.5800   1
   1  37   2 16.9792  7.7800   1
 -14   0   3 -0.0405  5.1161   1
 -13   0   3 -2.1191  4.8883   1
 -12   0   3 0.64805 5.13965   1
 -11   0   3 -0.2395  4.2798   1
  11   0  -3 0.25176 3.78151   3
  10   0  -3 -0.3041  3.6379   3
 -10   0   3 -5.5304  3.6720   1
  10   0  -3 -3.9038  3.5929   1
   9   0  -3 3.79543 3.90971   3
  -9   0   3 0.38790 3.18235   1
   9   0  -3 2.66290 3.60525   1
  -8   0   3 3.81942 3.42772   1
   8   0  -3 -0.5347  3.0993   1
   8   0  -3 2.63724 3.47170   3
  -7   0   3 -3.0408  2.7164   1
   7   0  -3 0.78114 2.86530   1
   7   0  -3 -1.3635  2.8168   3
  -6   0   3 1.07820 2.57461   1
   6   0  -3 -3.1834  1.7498   1
   6   0  -3 -0.7216  2.6391   3
   5   0  -3 -2.8879  1.6439   1
  -5   0   3 5.00492 2.28267   1
   5   0  -3 0.39642 2.64720   3
  -4   0   3 -0.3588  1.6771   1
   4   0  -3 -2.3077  2.1264   3
   4   0  -3 4.15681 1.86355   1
  -3   0   3 -0.3983  1.4050   1
   3   0  -3 -1.3804  1.9281   2
   3   0  -3 0.55009 1.62599   5
   3   0  -3 -4.4183  1.9864   3
   3   0  -3 1.53075 1.24242   1
  -2   0   3 -1.0022  1.2933   5
  -2   0   3 -0.3486  0.9513   1
   2   0  -3 0.43125 2.02078   3
  -2   0   3 0.71810 0.97969   1
  -2   0   3 -0.0644  0.9864   1
   2   0  -3 0.13181 1.97634   2
   2   0  -3 2.49971 1.48929   5
  -1   0   3 -0.7041  1.5238   4
   1   0  -3 -2.0222  1.8101   4
   1   0  -3 0.32648 1.17202   5
  -1   0   3 -1.2089  0.9576   5
   1   0  -3 0.12367 1.61344   3
   1   0  -3 -1.5373  1.6439   2
   0   0  -3 -1.1938  1.4162   3
   0   0   3 0.39711 0.64317   1
   0   0  -3 -1.2517  1.6083   4
   0   0   3 -0.2035  0.5868   1
   0   0  -3 0.56120 1.64594   2
   0   0   3 2.25389 1.65719   4
  -1   0  -3 -1.7562  1.8064   2
  -1   0  -3 -0.6327  1.3451   3
   1   0   3 -0.3288  1.5298   1
  -1   0  -3 -0.2578  2.2760   4
  -1   0  -3 -3.8275  1.1538   1
   2   0   3 -1.5023  1.9163   1
  -2   0  -3 -1.4628  1.5119   1
  -2   0  -3 -1.8195  1.7882   2
  -3   0  -3 -4.6725  1.6943   1
  -3   0  -3 -1.8135  1.7092   2
   3   0   3 -1.0171  2.1016   1
   4   0   3 -4.1973  1.7798   1
  -4   0  -3 0.74880 2.24420   1
  -4   0  -3 -3.0164  1.5751   2
   5   0   3 0.93663 2.57660   1
  -5   0  -3 -4.3394  2.0512   1
  -5   0  -3 1.14546 1.93956   2
   6   0   3 -1.3439  2.6640   1
  -6   0  -3 -1.1863  2.0546   2
  -6   0  -3 2.26794 3.00052   1
  -7   0  -3 3.07306 3.55460   1
   7   0   3 1.36609 3.40536   1
  -7   0  -3 -2.0666  2.1704   2
  -8   0  -3 -3.2179  2.0656   2
  -8   0  -3 -1.6506  3.6493   1
   8   0   3 -5.6986  3.3064   1
   9   0   3 8.99736 4.97306   1
  -9   0  -3 -5.2733  2.9487   1
 -10   0  -3 4.69792 4.01164   1
  10   0   3 -0.0082  4.2665   1
 -11   0  -3 7.45069 5.01811   1
  11   0   3 0.25017 4.22936   1
  12   0   3 1.12413 5.22262   1
 -12   0  -3 0.51883 4.70291   1
  13   0   3 2.10309 6.31760   1
 -13   0  -3 -9.0533  3.8632   1
 -14  -1   3 3.42891 5.47092   1
 -14   1   3 -5.0740  4.4370   1
 -13  -1   3 -5.6055  3.9732   1
 -13   1   3 -0.1929  4.8032   1
 -12  -1   3 7.16353 5.79739   1
 -12   1   3 2.19717 5.45687   1
  11  -1  -3 38.7605  6.8017   3
 -11  -1   3 45.4994  8.3552   1
  11   1  -3 48.9334  7.6969   3
 -11   1   3 43.9441  8.4772   1
 -10  -1   3 0.69752 4.29642   1
  10  -1  -3 3.02605 4.01352   1
  10  -1  -3 2.23917 4.00006   3
  10   1  -3 5.32822 4.33425   3
 -10   1   3 -1.4681  4.0514   1
  10   1  -3 8.58661 4.53669   1
  -9  -1   3 312.434  16.974   1
   9  -1  -3 327.598  16.391   1
   9  -1  -3 327.917  16.202   3
   9   1  -3 308.618  16.028   1
   9   1  -3 338.072  16.516   3
  -9   1   3 306.676  16.889   1
   8  -1  -3 117.762   9.147   3
   8  -1  -3 139.101   9.386   1
  -8  -1   3 124.651   9.679   1
   8   1  -3 144.788   9.414   1
  -8   1   3 124.673   9.689   1
   8   1  -3 130.334  10.049   3
  -7  -1   3 211.187  11.810   1
   7  -1  -3 210.291  11.193   1
   7  -1  -3 213.732  11.714   3
   7   1  -3 223.588  12.113   3
  -7   1   3 196.390  11.523   1
   7   1  -3 223.451  11.341   1
  -6  -1   3 154.310   8.838   1
   6  -1  -3 153.700   9.210   3
   6  -1  -3 128.904   8.024   1
   6   1  -3 152.649   9.356   3
  -6   1   3 142.473   8.621   1
   6   1  -3 149.102   8.503   1
   5  -1  -3 68.5918  4.9064   1
   5  -1  -3 56.4807  5.8047   3
  -5  -1   3 51.3080  5.2787   1
  -5   1   3 57.1812  5.2750   1
   5   1  -3 58.3227  6.1192   3
   5   1  -3 53.2034  4.9517   1
   4  -1  -3 39.0914  3.6105   1
   4  -1  -3 30.6544  4.1641   3
  -4  -1   3 42.3725  3.9784   1
   4   1  -3 36.9492  3.6853   1
   4   1  -3 33.9977  4.4032   3
  -4   1   3 38.2902  3.8281   1
  -3  -1   3 23.0209  2.6366   1
   3  -1  -3 19.2059  3.0933   2
   3  -1  -3 24.8760  3.6695   3
   3  -1  -3 17.2068  2.0708   1
  -3   1   3 19.9471  2.4471   1
   3   1  -3 21.6728  3.4925   3
   3   1  -3 19.7088  2.9053   5
   3   1  -3 15.6762  2.1475   1
  -2  -1   3 101.254   4.308   1
   2  -1  -3 108.763   5.885   2
   2  -1  -3 111.931   5.181   5
  -2  -1   3 107.481   5.591   5
  -2  -1   3 100.092   4.383   1
   2   1  -3 111.887   6.653   3
   2   1  -3 111.479   5.638   5
   2   1  -3 100.613   5.799   2
  -2   1   3 105.035   4.254   1
  -2   1   3 103.817   4.304   1
   1  -1  -3 48.4682  4.0514   2
  -1  -1   3 52.6823  3.3257   5
   1  -1  -3 45.2408  3.8234   3
   1  -1  -3 38.8055  4.1103   4
   1  -1  -3 46.1716  2.8594   5
  -1  -1   3 52.4303  4.6053   4
  -1   1   3 36.1920  3.9523   4
  -1   1   3 51.1996  2.8460   5
   1   1  -3 59.1540  3.6253   5
[truncated: 1,462,801 more chars]
