# Supplementary material for: Primary Amine Nucleophilic Addition to Nitrilium Closo-Dodecaborate [B12H11NCCH3]−: A Simple and Effective Route to the New BNCT Drug Design
Source: Int J Mol Sci. 2021 Dec 13;22(24):13391. doi: 10.3390/ijms222413391 (PMC8707455; doi:10.3390/ijms222413391)
Supplement: Supplementary file 1 [file ijms-22-13391-s001.zip › CCDC 2122678.cif]

 
data_zh108
 
_audit_creation_method            SHELXL-2014
_chemical_name_systematic
;
 ?
;
_chemical_name_common             ?
_chemical_melting_point           ?
_chemical_formula_moiety          ?
_chemical_formula_sum
 'C32 H47 B12 N2 P' 
_chemical_formula_weight          620.40

loop_
 _atom_type_symbol
 _atom_type_description
 _atom_type_scat_dispersion_real
 _atom_type_scat_dispersion_imag
 _atom_type_scat_source
 'C'  'C'   0.0033   0.0016
 'International Tables Vol C Tables 4.2.6.8 and 6.1.1.4'
 'H'  'H'   0.0000   0.0000
 'International Tables Vol C Tables 4.2.6.8 and 6.1.1.4'
 'B'  'B'   0.0013   0.0007
 'International Tables Vol C Tables 4.2.6.8 and 6.1.1.4'
 'N'  'N'   0.0061   0.0033
 'International Tables Vol C Tables 4.2.6.8 and 6.1.1.4'
 'P'  'P'   0.1023   0.0942
 'International Tables Vol C Tables 4.2.6.8 and 6.1.1.4'
 
_space_group_crystal_system       monoclinic
_space_group_IT_number            14
_space_group_name_H-M_alt         'P 21/c'
_space_group_name_Hall            '-P 2ybc'
 
_shelx_space_group_comment
;
The symmetry employed for this shelxl refinement is uniquely defined
by the following loop, which should always be used as a source of
symmetry information in preference to the above space-group names.
They are only intended as comments.
;
 
loop_
 _space_group_symop_operation_xyz
 'x, y, z'
 '-x, y+1/2, -z+1/2'
 '-x, -y, -z'
 'x, -y-1/2, z-1/2'
 
_cell_length_a                    16.137(4)
_cell_length_b                    14.573(3)
_cell_length_c                    16.905(4)
_cell_angle_alpha                 90
_cell_angle_beta                  116.783(4)
_cell_angle_gamma                 90
_cell_volume                      3549.0(14)
_cell_formula_units_Z             4
_cell_measurement_temperature     100(2)
_cell_measurement_reflns_used     1611
_cell_measurement_theta_min       3.04
_cell_measurement_theta_max       20.08
 
_exptl_crystal_description        'plate'
_exptl_crystal_colour             'colourless'
_exptl_crystal_density_meas       ? 
_exptl_crystal_density_method     ?              
_exptl_crystal_density_diffrn     1.161          
_exptl_crystal_F_000              1312
_exptl_transmission_factor_min    ?                                             
_exptl_transmission_factor_max    ?                                             
_exptl_crystal_size_max           0.200
_exptl_crystal_size_mid           0.180
_exptl_crystal_size_min           0.020
_exptl_absorpt_coefficient_mu     0.104
_shelx_estimated_absorpt_T_min    0.979
_shelx_estimated_absorpt_T_max    0.998
_exptl_absorpt_correction_type    none 
_exptl_absorpt_correction_T_min   ? 
_exptl_absorpt_correction_T_max   ? 
_exptl_absorpt_process_details    ? 
 
_exptl_special_details
;
 ?
;
 
_diffrn_ambient_temperature       100(2)
_diffrn_radiation_wavelength      0.71073
_diffrn_radiation_type            MoK\a
_diffrn_source                    ?                       
_diffrn_measurement_device_type    
 'Bruker KAPPA APEX II area-detector diffractometer' 
_diffrn_measurement_method        ? 
_diffrn_detector_area_resol_mean  ? 
_diffrn_reflns_number             24342
_diffrn_reflns_av_unetI/netI      0.1740
_diffrn_reflns_av_R_equivalents   0.1364
_diffrn_reflns_limit_h_min        -20
_diffrn_reflns_limit_h_max        20
_diffrn_reflns_limit_k_min        -18
_diffrn_reflns_limit_k_max        17
_diffrn_reflns_limit_l_min        -21
_diffrn_reflns_limit_l_max        21
_diffrn_reflns_theta_min          4.077
_diffrn_reflns_theta_max          27.499
_diffrn_reflns_theta_full         25.242
_diffrn_measured_fraction_theta_max   0.992
_diffrn_measured_fraction_theta_full  0.995
_diffrn_reflns_Laue_measured_fraction_max    0.992
_diffrn_reflns_Laue_measured_fraction_full   0.995
_diffrn_reflns_point_group_measured_fraction_max   0.992
_diffrn_reflns_point_group_measured_fraction_full  0.995
_reflns_number_total              8076
_reflns_number_gt                 3875
_reflns_threshold_expression      'I > 2\s(I)'
_reflns_Friedel_coverage          0.000
_reflns_Friedel_fraction_max      .
_reflns_Friedel_fraction_full     .
 
_reflns_special_details
;
 Reflections were merged by SHELXL according to the crystal
 class for the calculation of statistics and refinement.
 
 _reflns_Friedel_fraction is defined as the number of unique
 Friedel pairs measured divided by the number that would be
 possible theoretically, ignoring centric projections and
 systematic absences.
;
 
_computing_data_collection        ?
_computing_cell_refinement        ?
_computing_data_reduction         ?
_computing_structure_solution     ?
_computing_structure_refinement   'SHELXL-2014 (Sheldrick, 2014)'
_computing_molecular_graphics     ?
_computing_publication_material   ?
 
_refine_special_details
;
 ?
;
_refine_ls_structure_factor_coef  Fsqd
_refine_ls_matrix_type            full
_refine_ls_weighting_scheme       calc
_refine_ls_weighting_details
'w=1/[\s^2^(Fo^2^)+(0.0473P)^2^] where P=(Fo^2^+2Fc^2^)/3'
_atom_sites_solution_primary      ?
_atom_sites_solution_secondary    ?
_atom_sites_solution_hydrogens    mixed
_refine_ls_hydrogen_treatment     mixed
_refine_ls_extinction_method      none
_refine_ls_extinction_coef        .
_refine_ls_number_reflns          8076
_refine_ls_number_parameters      458
_refine_ls_number_restraints      0
_refine_ls_R_factor_all           0.1663
_refine_ls_R_factor_gt            0.0633
_refine_ls_wR_factor_ref          0.1418
_refine_ls_wR_factor_gt           0.1100
_refine_ls_goodness_of_fit_ref    0.939
_refine_ls_restrained_S_all       0.939
_refine_ls_shift/su_max           0.000
_refine_ls_shift/su_mean          0.000
 
loop_
 _atom_site_label
 _atom_site_type_symbol
 _atom_site_fract_x
 _atom_site_fract_y
 _atom_site_fract_z
 _atom_site_U_iso_or_equiv
 _atom_site_adp_type
 _atom_site_occupancy
 _atom_site_site_symmetry_order  
 _atom_site_calc_flag
 _atom_site_refinement_flags_posn
 _atom_site_refinement_flags_adp
 _atom_site_refinement_flags_occupancy
 _atom_site_disorder_assembly
 _atom_site_disorder_group
P1 P 0.87506(5) 0.60858(5) 0.30212(5) 0.01947(18) Uani 1 1 d . . . . .
N1 N 0.47598(15) 0.42729(15) 0.35017(15) 0.0231(6) Uani 1 1 d . . . . .
H1A H 0.5040 0.4262 0.4085 0.028 Uiso 1 1 calc R U . . .
N2 N 0.48976(16) 0.38730(16) 0.22608(15) 0.0269(6) Uani 1 1 d . . . . .
H2A H 0.4331 0.4087 0.1954 0.032 Uiso 1 1 calc R U . . .
C1 C 0.52198(19) 0.3867(2) 0.31305(19) 0.0238(7) Uani 1 1 d . . . . .
C2 C 0.61164(19) 0.3395(2) 0.3698(2) 0.0294(7) Uani 1 1 d . . . . .
H2B H 0.6253 0.3454 0.4323 0.044 Uiso 1 1 calc R U . . .
H2C H 0.6617 0.3677 0.3606 0.044 Uiso 1 1 calc R U . . .
H2D H 0.6066 0.2744 0.3538 0.044 Uiso 1 1 calc R U . . .
C3 C 0.53729(18) 0.3565(2) 0.17492(18) 0.0232(7) Uani 1 1 d . . . . .
H3A H 0.5797 0.3045 0.2067 0.028 Uiso 1 1 calc R U . . .
C4 C 0.5939(2) 0.4353(2) 0.1650(2) 0.0286(7) Uani 1 1 d . . . . .
H4A H 0.5529 0.4890 0.1391 0.034 Uiso 1 1 calc R U . . .
H4B H 0.6427 0.4532 0.2243 0.034 Uiso 1 1 calc R U . . .
C5 C 0.6391(2) 0.4090(2) 0.1062(2) 0.0349(8) Uani 1 1 d . . . . .
H5A H 0.6865 0.3611 0.1361 0.042 Uiso 1 1 calc R U . . .
H5B H 0.6707 0.4633 0.0972 0.042 Uiso 1 1 calc R U . . .
C6 C 0.5676(2) 0.3733(2) 0.0164(2) 0.0376(9) Uani 1 1 d . . . . .
H6A H 0.5255 0.4240 -0.0171 0.045 Uiso 1 1 calc R U . . .
H6B H 0.5998 0.3517 -0.0180 0.045 Uiso 1 1 calc R U . . .
C7 C 0.5107(2) 0.2953(2) 0.0264(2) 0.0333(8) Uani 1 1 d . . . . .
H7A H 0.5513 0.2415 0.0529 0.040 Uiso 1 1 calc R U . . .
H7B H 0.4618 0.2772 -0.0327 0.040 Uiso 1 1 calc R U . . .
C8 C 0.4659(2) 0.3241(2) 0.08509(19) 0.0305(8) Uani 1 1 d . . . . .
H8A H 0.4208 0.3740 0.0556 0.037 Uiso 1 1 calc R U . . .
H8B H 0.4314 0.2714 0.0927 0.037 Uiso 1 1 calc R U . . .
C11 C 0.95674(18) 0.69556(19) 0.36271(18) 0.0210(7) Uani 1 1 d . . . . .
C12 C 0.9459(2) 0.7494(2) 0.42564(19) 0.0297(8) Uani 1 1 d . . . . .
H12A H 0.8935 0.7409 0.4364 0.036 Uiso 1 1 calc R U . . .
C13 C 1.0115(2) 0.8149(2) 0.4722(2) 0.0387(9) Uani 1 1 d . . . . .
H13A H 1.0039 0.8523 0.5145 0.046 Uiso 1 1 calc R U . . .
C14 C 1.0883(2) 0.8263(2) 0.4574(2) 0.0392(9) Uani 1 1 d . . . . .
H14A H 1.1346 0.8699 0.4913 0.047 Uiso 1 1 calc R U . . .
C15 C 1.0984(2) 0.7750(2) 0.3936(2) 0.0350(8) Uani 1 1 d . . . . .
H15A H 1.1508 0.7839 0.3829 0.042 Uiso 1 1 calc R U . . .
C16 C 1.0320(2) 0.7104(2) 0.3454(2) 0.0277(7) Uani 1 1 d . . . . .
H16A H 1.0379 0.6761 0.3004 0.033 Uiso 1 1 calc R U . . .
C21 C 0.77657(17) 0.61077(19) 0.32475(17) 0.0193(6) Uani 1 1 d . . . . .
C22 C 0.69204(18) 0.6499(2) 0.26658(19) 0.0244(7) Uani 1 1 d . . . . .
H22A H 0.6850 0.6785 0.2134 0.029 Uiso 1 1 calc R U . . .
C23 C 0.61834(19) 0.6463(2) 0.2876(2) 0.0268(7) Uani 1 1 d . . . . .
H23A H 0.5605 0.6729 0.2485 0.032 Uiso 1 1 calc R U . . .
C24 C 0.62765(19) 0.6049(2) 0.36437(19) 0.0257(7) Uani 1 1 d . . . . .
H24A H 0.5765 0.6028 0.3777 0.031 Uiso 1 1 calc R U . . .
C25 C 0.7117(2) 0.5662(2) 0.42207(19) 0.0274(7) Uani 1 1 d . . . . .
H25A H 0.7183 0.5375 0.4751 0.033 Uiso 1 1 calc R U . . .
C26 C 0.78611(19) 0.5694(2) 0.40240(19) 0.0250(7) Uani 1 1 d . . . . .
H26A H 0.8439 0.5432 0.4421 0.030 Uiso 1 1 calc R U . . .
C31 C 0.92404(18) 0.49629(18) 0.33084(17) 0.0191(6) Uani 1 1 d . . . . .
C32 C 1.01896(19) 0.4812(2) 0.36419(18) 0.0234(7) Uani 1 1 d . . . . .
H32A H 1.0604 0.5317 0.3786 0.028 Uiso 1 1 calc R U . . .
C33 C 1.05274(19) 0.3925(2) 0.37625(18) 0.0250(7) Uani 1 1 d . . . . .
H33A H 1.1175 0.3824 0.3981 0.030 Uiso 1 1 calc R U . . .
C34 C 0.9937(2) 0.3188(2) 0.35691(19) 0.0258(7) Uani 1 1 d . . . . .
H34A H 1.0180 0.2582 0.3659 0.031 Uiso 1 1 calc R U . . .
C35 C 0.8998(2) 0.3322(2) 0.3246(2) 0.0282(7) Uani 1 1 d . . . . .
H35A H 0.8592 0.2811 0.3117 0.034 Uiso 1 1 calc R U . . .
C36 C 0.86451(19) 0.42056(19) 0.31101(19) 0.0252(7) Uani 1 1 d . . . . .
H36A H 0.7995 0.4299 0.2881 0.030 Uiso 1 1 calc R U . . .
C41 C 0.84016(18) 0.62608(19) 0.18701(17) 0.0194(6) Uani 1 1 d . . . . .
C42 C 0.8501(2) 0.5567(2) 0.1355(2) 0.0312(8) Uani 1 1 d . . . . .
H42A H 0.8769 0.4996 0.1615 0.037 Uiso 1 1 calc R U . . .
C43 C 0.8206(2) 0.5715(2) 0.0463(2) 0.0388(9) Uani 1 1 d . . . . .
H43A H 0.8281 0.5246 0.0111 0.047 Uiso 1 1 calc R U . . .
C44 C 0.7803(2) 0.6539(2) 0.0074(2) 0.0298(8) Uani 1 1 d . . . . .
H44A H 0.7584 0.6629 -0.0544 0.036 Uiso 1 1 calc R U . . .
C45 C 0.77205(18) 0.7228(2) 0.05883(19) 0.0254(7) Uani 1 1 d . . . . .
H45A H 0.7453 0.7798 0.0323 0.030 Uiso 1 1 calc R U . . .
C46 C 0.80210(18) 0.7103(2) 0.14845(19) 0.0228(7) Uani 1 1 d . . . . .
H46A H 0.7970 0.7587 0.1837 0.027 Uiso 1 1 calc R U . . .
B1 B 0.3179(2) 0.5163(2) 0.1985(2) 0.0224(8) Uani 1 1 d . . . . .
H1 H 0.3435(18) 0.5108(17) 0.1475(17) 0.027 Uiso 1 1 d . U . . .
B2 B 0.3816(2) 0.4764(2) 0.3096(2) 0.0244(8) Uani 1 1 d . . . . .
B3 B 0.3684(2) 0.5965(2) 0.2869(2) 0.0244(8) Uani 1 1 d . . . . .
H3 H 0.4269(19) 0.6403(18) 0.2949(17) 0.029 Uiso 1 1 d . U . . .
B4 B 0.2549(2) 0.6153(3) 0.2010(2) 0.0250(8) Uani 1 1 d . . . . .
H4 H 0.2401(18) 0.6753(18) 0.1491(17) 0.030 Uiso 1 1 d . U . . .
B5 B 0.1982(2) 0.5062(2) 0.1701(2) 0.0233(8) Uani 1 1 d . . . . .
H5 H 0.1422(18) 0.4913(17) 0.0967(17) 0.028 Uiso 1 1 d . U . . .
B6 B 0.2765(2) 0.4203(2) 0.2367(2) 0.0233(8) Uani 1 1 d . . . . .
H6 H 0.2767(18) 0.3464(19) 0.2143(17) 0.028 Uiso 1 1 d . U . . .
B7 B 0.3020(2) 0.4425(2) 0.3492(2) 0.0232(8) Uani 1 1 d . . . . .
H7 H 0.3214(18) 0.3865(18) 0.4013(17) 0.028 Uiso 1 1 d . U . . .
B8 B 0.3583(2) 0.5512(2) 0.3797(2) 0.0259(8) Uani 1 1 d . . . . .
H8 H 0.4153(19) 0.5646(18) 0.4495(18) 0.031 Uiso 1 1 d . U . . .
B9 B 0.2795(2) 0.6362(3) 0.3128(2) 0.0260(8) Uani 1 1 d . . . . .
H9 H 0.2795(19) 0.7071(19) 0.3372(18) 0.031 Uiso 1 1 d . U . . .
B10 B 0.1742(2) 0.5806(2) 0.2404(2) 0.0249(8) Uani 1 1 d . . . . .
H10 H 0.1028(19) 0.6150(18) 0.2154(17) 0.030 Uiso 1 1 d . U . . .
B11 B 0.1885(2) 0.4609(2) 0.2629(2) 0.0234(8) Uani 1 1 d . . . . .
H11 H 0.1244(18) 0.4159(18) 0.2507(17) 0.028 Uiso 1 1 d . U . . .
B12 B 0.2380(2) 0.5416(2) 0.3512(2) 0.0237(8) Uani 1 1 d . . . . .
H12 H 0.2148(18) 0.5540(18) 0.4036(17) 0.028 Uiso 1 1 d . U . . .
 
loop_
 _atom_site_aniso_label
 _atom_site_aniso_U_11
 _atom_site_aniso_U_22
 _atom_site_aniso_U_33
 _atom_site_aniso_U_23
 _atom_site_aniso_U_13
 _atom_site_aniso_U_12
P1 0.0132(4) 0.0232(4) 0.0228(4) 0.0002(3) 0.0089(3) 0.0009(3)
N1 0.0188(13) 0.0257(15) 0.0247(13) 0.0010(11) 0.0096(11) 0.0033(11)
N2 0.0178(12) 0.0357(16) 0.0278(14) 0.0016(12) 0.0107(11) 0.0088(12)
C1 0.0180(15) 0.0205(17) 0.0327(17) 0.0016(14) 0.0112(13) -0.0012(13)
C2 0.0216(16) 0.0303(19) 0.0350(19) 0.0046(15) 0.0114(14) 0.0080(14)
C3 0.0168(15) 0.0230(17) 0.0310(17) -0.0012(13) 0.0118(13) 0.0034(13)
C4 0.0212(16) 0.0279(18) 0.0386(19) 0.0022(15) 0.0151(14) 0.0036(14)
C5 0.0325(18) 0.033(2) 0.048(2) 0.0001(16) 0.0255(17) -0.0029(15)
C6 0.048(2) 0.035(2) 0.037(2) 0.0035(16) 0.0263(17) 0.0094(17)
C7 0.0330(19) 0.034(2) 0.0302(19) -0.0034(15) 0.0117(15) 0.0081(15)
C8 0.0238(17) 0.033(2) 0.0316(18) -0.0029(15) 0.0103(15) -0.0015(14)
C11 0.0191(15) 0.0184(17) 0.0240(16) 0.0002(12) 0.0085(13) -0.0013(12)
C12 0.0335(19) 0.0301(19) 0.0299(18) -0.0006(14) 0.0182(15) -0.0039(15)
C13 0.054(2) 0.034(2) 0.0321(19) -0.0127(15) 0.0233(18) -0.0160(17)
C14 0.041(2) 0.036(2) 0.032(2) -0.0008(16) 0.0094(17) -0.0180(17)
C15 0.0264(18) 0.037(2) 0.040(2) -0.0014(16) 0.0132(16) -0.0106(15)
C16 0.0237(16) 0.0285(19) 0.0330(18) -0.0020(14) 0.0147(14) -0.0041(14)
C21 0.0142(13) 0.0226(16) 0.0225(15) -0.0029(13) 0.0094(12) -0.0024(13)
C22 0.0191(15) 0.0252(18) 0.0296(17) -0.0014(14) 0.0116(13) -0.0017(13)
C23 0.0164(15) 0.0282(18) 0.0368(18) 0.0001(15) 0.0129(14) 0.0021(13)
C24 0.0222(15) 0.0245(18) 0.0381(18) -0.0073(15) 0.0204(14) -0.0028(14)
C25 0.0287(17) 0.0297(19) 0.0278(17) -0.0010(14) 0.0161(15) -0.0023(14)
C26 0.0195(15) 0.0303(18) 0.0267(17) -0.0024(14) 0.0117(13) -0.0013(13)
C31 0.0147(14) 0.0211(17) 0.0216(15) -0.0020(13) 0.0083(12) -0.0022(12)
C32 0.0202(15) 0.0238(17) 0.0281(17) -0.0014(14) 0.0127(13) -0.0038(13)
C33 0.0169(15) 0.0272(18) 0.0322(17) 0.0039(14) 0.0123(13) 0.0043(14)
C34 0.0258(17) 0.0219(17) 0.0322(18) 0.0014(14) 0.0152(14) 0.0017(14)
C35 0.0231(16) 0.0242(18) 0.0379(19) -0.0019(14) 0.0142(14) -0.0042(14)
C36 0.0164(15) 0.0240(18) 0.0353(18) 0.0000(14) 0.0118(13) -0.0010(13)
C41 0.0133(13) 0.0250(18) 0.0201(15) -0.0003(13) 0.0078(12) -0.0018(12)
C42 0.0374(19) 0.031(2) 0.0329(19) 0.0015(15) 0.0222(16) 0.0050(15)
C43 0.049(2) 0.039(2) 0.034(2) -0.0058(17) 0.0244(18) 0.0040(18)
C44 0.0277(17) 0.039(2) 0.0240(17) -0.0015(15) 0.0129(14) -0.0049(15)
C45 0.0133(15) 0.0320(19) 0.0282(17) 0.0036(14) 0.0071(13) -0.0038(13)
C46 0.0180(15) 0.0237(17) 0.0288(17) -0.0008(14) 0.0123(13) -0.0046(13)
B1 0.0183(17) 0.026(2) 0.0282(19) 0.0020(16) 0.0150(15) 0.0022(15)
B2 0.0203(18) 0.027(2) 0.0279(19) 0.0023(16) 0.0129(15) -0.0001(16)
B3 0.0168(16) 0.023(2) 0.033(2) 0.0013(16) 0.0113(15) -0.0026(15)
B4 0.0178(17) 0.029(2) 0.0292(19) 0.0039(17) 0.0120(15) 0.0048(16)
B5 0.0175(17) 0.030(2) 0.0235(18) -0.0021(15) 0.0101(15) -0.0009(15)
B6 0.0216(18) 0.024(2) 0.0275(19) -0.0022(16) 0.0134(15) -0.0018(15)
B7 0.0203(18) 0.025(2) 0.028(2) 0.0017(16) 0.0149(16) 0.0004(15)
B8 0.0198(18) 0.028(2) 0.029(2) -0.0027(16) 0.0104(16) 0.0020(15)
B9 0.0162(17) 0.024(2) 0.036(2) -0.0053(16) 0.0106(16) -0.0005(15)
B10 0.0194(18) 0.030(2) 0.0285(19) -0.0026(16) 0.0133(16) -0.0003(16)
B11 0.0185(18) 0.026(2) 0.0267(19) 0.0007(15) 0.0106(15) -0.0010(15)
B12 0.0176(17) 0.031(2) 0.0238(19) -0.0018(15) 0.0105(15) 0.0004(15)
 
_geom_special_details
;
 All esds (except the esd in the dihedral angle between two l.s. planes)
 are estimated using the full covariance matrix.  The cell esds are taken
 into account individually in the estimation of esds in distances, angles
 and torsion angles; correlations between esds in cell parameters are only
 used when they are defined by crystal symmetry.  An approximate (isotropic)
 treatment of cell esds is used for estimating esds involving l.s. planes.
;
 
loop_
 _geom_bond_atom_site_label_1
 _geom_bond_atom_site_label_2
 _geom_bond_distance
 _geom_bond_site_symmetry_2
 _geom_bond_publ_flag
P1 C11 1.782(3) . ?
P1 C41 1.784(3) . ?
P1 C31 1.787(3) . ?
P1 C21 1.795(3) . ?
N1 C1 1.309(3) . ?
N1 B2 1.536(4) . ?
N1 H1A 0.8800 . ?
N2 C1 1.320(3) . ?
N2 C3 1.462(3) . ?
N2 H2A 0.8800 . ?
C1 C2 1.496(4) . ?
C2 H2B 0.9800 . ?
C2 H2C 0.9800 . ?
C2 H2D 0.9800 . ?
C3 C8 1.510(4) . ?
C3 C4 1.524(4) . ?
C3 H3A 1.0000 . ?
C4 C5 1.523(4) . ?
C4 H4A 0.9900 . ?
C4 H4B 0.9900 . ?
C5 C6 1.526(4) . ?
C5 H5A 0.9900 . ?
C5 H5B 0.9900 . ?
C6 C7 1.518(4) . ?
C6 H6A 0.9900 . ?
C6 H6B 0.9900 . ?
C7 C8 1.527(4) . ?
C7 H7A 0.9900 . ?
C7 H7B 0.9900 . ?
C8 H8A 0.9900 . ?
C8 H8B 0.9900 . ?
C11 C16 1.388(4) . ?
C11 C12 1.395(4) . ?
C12 C13 1.380(4) . ?
C12 H12A 0.9500 . ?
C13 C14 1.380(4) . ?
C13 H13A 0.9500 . ?
C14 C15 1.381(4) . ?
C14 H14A 0.9500 . ?
C15 C16 1.382(4) . ?
C15 H15A 0.9500 . ?
C16 H16A 0.9500 . ?
C21 C26 1.389(4) . ?
C21 C22 1.394(4) . ?
C22 C23 1.388(4) . ?
C22 H22A 0.9500 . ?
C23 C24 1.376(4) . ?
C23 H23A 0.9500 . ?
C24 C25 1.385(4) . ?
C24 H24A 0.9500 . ?
C25 C26 1.383(4) . ?
C25 H25A 0.9500 . ?
C26 H26A 0.9500 . ?
C31 C32 1.391(4) . ?
C31 C36 1.401(4) . ?
C32 C33 1.381(4) . ?
C32 H32A 0.9500 . ?
C33 C34 1.375(4) . ?
C33 H33A 0.9500 . ?
C34 C35 1.374(4) . ?
C34 H34A 0.9500 . ?
C35 C36 1.385(4) . ?
C35 H35A 0.9500 . ?
C36 H36A 0.9500 . ?
C41 C42 1.390(4) . ?
C41 C46 1.396(4) . ?
C42 C43 1.379(4) . ?
C42 H42A 0.9500 . ?
C43 C44 1.383(4) . ?
C43 H43A 0.9500 . ?
C44 C45 1.372(4) . ?
C44 H44A 0.9500 . ?
C45 C46 1.379(4) . ?
C45 H45A 0.9500 . ?
C46 H46A 0.9500 . ?
B1 B5 1.775(4) . ?
B1 B4 1.777(5) . ?
B1 B3 1.780(5) . ?
B1 B2 1.784(5) . ?
B1 B6 1.793(5) . ?
B1 H1 1.11(3) . ?
B2 B7 1.766(5) . ?
B2 B8 1.771(5) . ?
B2 B6 1.784(5) . ?
B2 B3 1.784(5) . ?
B3 B4 1.773(5) . ?
B3 B9 1.775(5) . ?
B3 B8 1.776(5) . ?
B3 H3 1.10(3) . ?
B4 B9 1.774(5) . ?
B4 B10 1.782(5) . ?
B4 B5 1.791(5) . ?
B4 H4 1.18(3) . ?
B5 B11 1.772(5) . ?
B5 B10 1.775(5) . ?
B5 B6 1.775(5) . ?
B5 H5 1.18(3) . ?
B6 B11 1.768(5) . ?
B6 B7 1.784(5) . ?
B6 H6 1.14(3) . ?
B7 B11 1.773(5) . ?
B7 B8 1.784(5) . ?
B7 B12 1.784(5) . ?
B7 H7 1.14(3) . ?
B8 B9 1.772(5) . ?
B8 B12 1.782(5) . ?
B8 H8 1.14(3) . ?
B9 B12 1.778(5) . ?
B9 B10 1.780(5) . ?
B9 H9 1.11(3) . ?
B10 B12 1.776(5) . ?
B10 B11 1.779(5) . ?
B10 H10 1.15(3) . ?
B11 B12 1.782(5) . ?
B11 H11 1.16(3) . ?
B12 H12 1.12(3) . ?
 
loop_
 _geom_angle_atom_site_label_1
 _geom_angle_atom_site_label_2
 _geom_angle_atom_site_label_3
 _geom_angle
 _geom_angle_site_symmetry_1
 _geom_angle_site_symmetry_3
 _geom_angle_publ_flag
C11 P1 C41 108.27(13) . . ?
C11 P1 C31 111.91(13) . . ?
C41 P1 C31 108.11(13) . . ?
C11 P1 C21 111.19(13) . . ?
C41 P1 C21 110.82(12) . . ?
C31 P1 C21 106.51(13) . . ?
C1 N1 B2 131.2(3) . . ?
C1 N1 H1A 114.4 . . ?
B2 N1 H1A 114.4 . . ?
C1 N2 C3 127.5(2) . . ?
C1 N2 H2A 116.3 . . ?
C3 N2 H2A 116.3 . . ?
N1 C1 N2 120.5(3) . . ?
N1 C1 C2 119.6(3) . . ?
N2 C1 C2 119.9(3) . . ?
C1 C2 H2B 109.5 . . ?
C1 C2 H2C 109.5 . . ?
H2B C2 H2C 109.5 . . ?
C1 C2 H2D 109.5 . . ?
H2B C2 H2D 109.5 . . ?
H2C C2 H2D 109.5 . . ?
N2 C3 C8 109.0(2) . . ?
N2 C3 C4 109.5(2) . . ?
C8 C3 C4 110.4(2) . . ?
N2 C3 H3A 109.3 . . ?
C8 C3 H3A 109.3 . . ?
C4 C3 H3A 109.3 . . ?
C5 C4 C3 111.6(2) . . ?
C5 C4 H4A 109.3 . . ?
C3 C4 H4A 109.3 . . ?
C5 C4 H4B 109.3 . . ?
C3 C4 H4B 109.3 . . ?
H4A C4 H4B 108.0 . . ?
C4 C5 C6 111.4(3) . . ?
C4 C5 H5A 109.3 . . ?
C6 C5 H5A 109.3 . . ?
C4 C5 H5B 109.3 . . ?
C6 C5 H5B 109.3 . . ?
H5A C5 H5B 108.0 . . ?
C7 C6 C5 111.7(3) . . ?
C7 C6 H6A 109.3 . . ?
C5 C6 H6A 109.3 . . ?
C7 C6 H6B 109.3 . . ?
C5 C6 H6B 109.3 . . ?
H6A C6 H6B 107.9 . . ?
C6 C7 C8 110.7(3) . . ?
C6 C7 H7A 109.5 . . ?
C8 C7 H7A 109.5 . . ?
C6 C7 H7B 109.5 . . ?
C8 C7 H7B 109.5 . . ?
H7A C7 H7B 108.1 . . ?
C3 C8 C7 111.6(2) . . ?
C3 C8 H8A 109.3 . . ?
C7 C8 H8A 109.3 . . ?
C3 C8 H8B 109.3 . . ?
C7 C8 H8B 109.3 . . ?
H8A C8 H8B 108.0 . . ?
C16 C11 C12 119.7(3) . . ?
C16 C11 P1 118.7(2) . . ?
C12 C11 P1 121.6(2) . . ?
C13 C12 C11 119.7(3) . . ?
C13 C12 H12A 120.1 . . ?
C11 C12 H12A 120.1 . . ?
C12 C13 C14 120.1(3) . . ?
C12 C13 H13A 119.9 . . ?
C14 C13 H13A 119.9 . . ?
C13 C14 C15 120.5(3) . . ?
C13 C14 H14A 119.7 . . ?
C15 C14 H14A 119.7 . . ?
C14 C15 C16 119.7(3) . . ?
C14 C15 H15A 120.1 . . ?
C16 C15 H15A 120.1 . . ?
C15 C16 C11 120.1(3) . . ?
C15 C16 H16A 119.9 . . ?
C11 C16 H16A 119.9 . . ?
C26 C21 C22 120.1(2) . . ?
C26 C21 P1 117.5(2) . . ?
C22 C21 P1 122.4(2) . . ?
C23 C22 C21 118.9(3) . . ?
C23 C22 H22A 120.6 . . ?
C21 C22 H22A 120.6 . . ?
C24 C23 C22 121.1(3) . . ?
C24 C23 H23A 119.5 . . ?
C22 C23 H23A 119.5 . . ?
C23 C24 C25 119.9(3) . . ?
C23 C24 H24A 120.0 . . ?
C25 C24 H24A 120.0 . . ?
C26 C25 C24 119.9(3) . . ?
C26 C25 H25A 120.1 . . ?
C24 C25 H25A 120.1 . . ?
C25 C26 C21 120.2(3) . . ?
C25 C26 H26A 119.9 . . ?
C21 C26 H26A 119.9 . . ?
C32 C31 C36 118.9(3) . . ?
C32 C31 P1 121.8(2) . . ?
C36 C31 P1 119.0(2) . . ?
C33 C32 C31 119.8(3) . . ?
C33 C32 H32A 120.1 . . ?
C31 C32 H32A 120.1 . . ?
C34 C33 C32 120.7(3) . . ?
C34 C33 H33A 119.6 . . ?
C32 C33 H33A 119.6 . . ?
C35 C34 C33 120.4(3) . . ?
C35 C34 H34A 119.8 . . ?
C33 C34 H34A 119.8 . . ?
C34 C35 C36 119.7(3) . . ?
C34 C35 H35A 120.1 . . ?
C36 C35 H35A 120.1 . . ?
C35 C36 C31 120.4(3) . . ?
C35 C36 H36A 119.8 . . ?
C31 C36 H36A 119.8 . . ?
C42 C41 C46 119.8(3) . . ?
C42 C41 P1 120.7(2) . . ?
C46 C41 P1 119.4(2) . . ?
C43 C42 C41 119.5(3) . . ?
C43 C42 H42A 120.3 . . ?
C41 C42 H42A 120.3 . . ?
C42 C43 C44 120.8(3) . . ?
C42 C43 H43A 119.6 . . ?
C44 C43 H43A 119.6 . . ?
C45 C44 C43 119.6(3) . . ?
C45 C44 H44A 120.2 . . ?
C43 C44 H44A 120.2 . . ?
C44 C45 C46 120.9(3) . . ?
C44 C45 H45A 119.6 . . ?
C46 C45 H45A 119.6 . . ?
C45 C46 C41 119.5(3) . . ?
C45 C46 H46A 120.3 . . ?
C41 C46 H46A 120.3 . . ?
B5 B1 B4 60.57(19) . . ?
B5 B1 B3 108.2(2) . . ?
B4 B1 B3 59.79(19) . . ?
B5 B1 B2 107.3(2) . . ?
B4 B1 B2 107.7(2) . . ?
B3 B1 B2 60.08(19) . . ?
B5 B1 B6 59.66(18) . . ?
B4 B1 B6 108.3(2) . . ?
B3 B1 B6 108.3(2) . . ?
B2 B1 B6 59.82(19) . . ?
B5 B1 H1 121.5(14) . . ?
B4 B1 H1 119.6(13) . . ?
B3 B1 H1 120.6(13) . . ?
B2 B1 H1 123.5(13) . . ?
B6 B1 H1 123.4(13) . . ?
N1 B2 B7 116.4(3) . . ?
N1 B2 B8 117.0(3) . . ?
B7 B2 B8 60.6(2) . . ?
N1 B2 B6 122.5(3) . . ?
B7 B2 B6 60.32(19) . . ?
B8 B2 B6 108.8(2) . . ?
N1 B2 B1 127.4(3) . . ?
B7 B2 B1 108.5(2) . . ?
B8 B2 B1 108.0(2) . . ?
B6 B2 B1 60.34(19) . . ?
N1 B2 B3 123.5(2) . . ?
B7 B2 B3 108.6(2) . . ?
B8 B2 B3 59.93(19) . . ?
B6 B2 B3 108.5(2) . . ?
B1 B2 B3 59.84(19) . . ?
B4 B3 B9 60.00(19) . . ?
B4 B3 B8 108.0(2) . . ?
B9 B3 B8 59.87(19) . . ?
B4 B3 B1 60.02(19) . . ?
B9 B3 B1 107.8(2) . . ?
B8 B3 B1 108.0(2) . . ?
B4 B3 B2 107.9(2) . . ?
B9 B3 B2 107.4(2) . . ?
B8 B3 B2 59.67(19) . . ?
B1 B3 B2 60.08(19) . . ?
B4 B3 H3 121.7(14) . . ?
B9 B3 H3 121.8(14) . . ?
B8 B3 H3 121.7(14) . . ?
B1 B3 H3 121.8(14) . . ?
B2 B3 H3 122.1(14) . . ?
B3 B4 B9 60.06(19) . . ?
B3 B4 B1 60.19(19) . . ?
B9 B4 B1 108.0(2) . . ?
B3 B4 B10 108.0(2) . . ?
B9 B4 B10 60.08(19) . . ?
B1 B4 B10 107.5(2) . . ?
B3 B4 B5 107.8(2) . . ?
B9 B4 B5 107.6(2) . . ?
B1 B4 B5 59.67(18) . . ?
B10 B4 B5 59.56(19) . . ?
B3 B4 H4 120.7(13) . . ?
B9 B4 H4 122.4(13) . . ?
B1 B4 H4 120.5(13) . . ?
B10 B4 H4 123.3(13) . . ?
B5 B4 H4 122.3(13) . . ?
B11 B5 B10 60.19(19) . . ?
B11 B5 B6 59.78(18) . . ?
B10 B5 B6 108.3(2) . . ?
B11 B5 B1 108.1(2) . . ?
B10 B5 B1 107.9(2) . . ?
B6 B5 B1 60.67(19) . . ?
B11 B5 B4 108.1(2) . . ?
B10 B5 B4 59.96(19) . . ?
B6 B5 B4 108.5(2) . . ?
B1 B5 B4 59.75(18) . . ?
B11 B5 H5 122.1(13) . . ?
B10 B5 H5 121.5(13) . . ?
B6 B5 H5 121.8(13) . . ?
B1 B5 H5 121.6(13) . . ?
B4 B5 H5 121.2(13) . . ?
B11 B6 B5 60.02(19) . . ?
B11 B6 B2 107.2(2) . . ?
B5 B6 B2 107.4(2) . . ?
B11 B6 B7 59.91(18) . . ?
B5 B6 B7 107.7(2) . . ?
B2 B6 B7 59.36(18) . . ?
B11 B6 B1 107.5(2) . . ?
B5 B6 B1 59.67(18) . . ?
B2 B6 B1 59.84(19) . . ?
B7 B6 B1 107.4(2) . . ?
B11 B6 H6 121.4(13) . . ?
B5 B6 H6 124.2(13) . . ?
B2 B6 H6 121.2(13) . . ?
B7 B6 H6 119.4(13) . . ?
B1 B6 H6 124.0(13) . . ?
B2 B7 B11 107.7(2) . . ?
B2 B7 B8 59.84(19) . . ?
B11 B7 B8 107.9(2) . . ?
B2 B7 B6 60.32(18) . . ?
B11 B7 B6 59.59(18) . . ?
B8 B7 B6 108.2(2) . . ?
B2 B7 B12 107.8(2) . . ?
B11 B7 B12 60.13(19) . . ?
B8 B7 B12 59.95(19) . . ?
B6 B7 B12 108.0(2) . . ?
B2 B7 H7 120.1(13) . . ?
B11 B7 H7 124.6(13) . . ?
B8 B7 H7 119.1(13) . . ?
B6 B7 H7 123.2(13) . . ?
B12 B7 H7 121.7(13) . . ?
B2 B8 B9 108.1(3) . . ?
B2 B8 B3 60.4(2) . . ?
B9 B8 B3 60.04(19) . . ?
B2 B8 B12 107.7(2) . . ?
B9 B8 B12 60.05(19) . . ?
B3 B8 B12 108.2(2) . . ?
B2 B8 B7 59.60(19) . . ?
B9 B8 B7 108.1(2) . . ?
B3 B8 B7 108.2(2) . . ?
B12 B8 B7 60.04(19) . . ?
B2 B8 H8 118.9(14) . . ?
B9 B8 H8 123.6(14) . . ?
B3 B8 H8 119.9(14) . . ?
B12 B8 H8 124.5(14) . . ?
B7 B8 H8 121.4(14) . . ?
B8 B9 B4 108.2(2) . . ?
B8 B9 B3 60.09(19) . . ?
B4 B9 B3 59.94(19) . . ?
B8 B9 B12 60.28(19) . . ?
B4 B9 B12 108.4(2) . . ?
B3 B9 B12 108.4(2) . . ?
B8 B9 B10 108.0(3) . . ?
B4 B9 B10 60.19(19) . . ?
B3 B9 B10 108.0(2) . . ?
B12 B9 B10 59.89(19) . . ?
B8 B9 H9 122.2(14) . . ?
B4 B9 H9 121.2(14) . . ?
B3 B9 H9 121.9(14) . . ?
B12 B9 H9 121.5(14) . . ?
B10 B9 H9 121.3(14) . . ?
B5 B10 B12 108.2(2) . . ?
B5 B10 B11 59.83(19) . . ?
B12 B10 B11 60.18(19) . . ?
B5 B10 B9 108.1(2) . . ?
B12 B10 B9 60.01(19) . . ?
B11 B10 B9 108.0(2) . . ?
B5 B10 B4 60.48(19) . . ?
B12 B10 B4 108.1(2) . . ?
B11 B10 B4 108.2(2) . . ?
B9 B10 B4 59.73(19) . . ?
B5 B10 H10 120.4(13) . . ?
B12 B10 H10 122.5(13) . . ?
B11 B10 H10 121.3(13) . . ?
B9 B10 H10 122.8(13) . . ?
B4 B10 H10 121.3(13) . . ?
B6 B11 B5 60.20(19) . . ?
B6 B11 B7 60.49(19) . . ?
B5 B11 B7 108.3(2) . . ?
B6 B11 B10 108.4(2) . . ?
B5 B11 B10 59.98(19) . . ?
B7 B11 B10 108.1(2) . . ?
B6 B11 B12 108.8(2) . . ?
B5 B11 B12 108.1(2) . . ?
B7 B11 B12 60.23(19) . . ?
B10 B11 B12 59.84(19) . . ?
B6 B11 H11 121.2(13) . . ?
B5 B11 H11 118.7(13) . . ?
B7 B11 H11 124.5(13) . . ?
B10 B11 H11 119.7(13) . . ?
B12 B11 H11 123.2(13) . . ?
B10 B12 B9 60.10(19) . . ?
B10 B12 B11 59.98(19) . . ?
B9 B12 B11 107.9(2) . . ?
B10 B12 B8 107.7(2) . . ?
B9 B12 B8 59.68(19) . . ?
B11 B12 B8 107.5(2) . . ?
B10 B12 B7 107.7(2) . . ?
B9 B12 B7 107.8(2) . . ?
B11 B12 B7 59.64(19) . . ?
B8 B12 B7 60.02(19) . . ?
B10 B12 H12 122.7(14) . . ?
B9 B12 H12 118.5(13) . . ?
B11 B12 H12 125.8(14) . . ?
B8 B12 H12 119.0(14) . . ?
B7 B12 H12 123.2(14) . . ?
 
loop_
 _geom_torsion_atom_site_label_1
 _geom_torsion_atom_site_label_2
 _geom_torsion_atom_site_label_3
 _geom_torsion_atom_site_label_4
 _geom_torsion
 _geom_torsion_site_symmetry_1
 _geom_torsion_site_symmetry_2
 _geom_torsion_site_symmetry_3
 _geom_torsion_site_symmetry_4
 _geom_torsion_publ_flag
B2 N1 C1 N2 3.2(5) . . . . ?
B2 N1 C1 C2 -176.7(3) . . . . ?
C3 N2 C1 N1 171.3(3) . . . . ?
C3 N2 C1 C2 -8.8(4) . . . . ?
C1 N2 C3 C8 151.5(3) . . . . ?
C1 N2 C3 C4 -87.6(3) . . . . ?
N2 C3 C4 C5 -175.6(2) . . . . ?
C8 C3 C4 C5 -55.7(3) . . . . ?
C3 C4 C5 C6 54.3(3) . . . . ?
C4 C5 C6 C7 -53.9(4) . . . . ?
C5 C6 C7 C8 54.6(3) . . . . ?
N2 C3 C8 C7 177.1(2) . . . . ?
C4 C3 C8 C7 56.8(3) . . . . ?
C6 C7 C8 C3 -56.6(3) . . . . ?
C41 P1 C11 C16 -50.8(3) . . . . ?
C31 P1 C11 C16 68.3(3) . . . . ?
C21 P1 C11 C16 -172.8(2) . . . . ?
C41 P1 C11 C12 128.3(2) . . . . ?
C31 P1 C11 C12 -112.7(2) . . . . ?
C21 P1 C11 C12 6.3(3) . . . . ?
C16 C11 C12 C13 -2.0(4) . . . . ?
P1 C11 C12 C13 178.9(2) . . . . ?
C11 C12 C13 C14 -0.9(5) . . . . ?
C12 C13 C14 C15 2.5(5) . . . . ?
C13 C14 C15 C16 -1.2(5) . . . . ?
C14 C15 C16 C11 -1.7(5) . . . . ?
C12 C11 C16 C15 3.4(4) . . . . ?
P1 C11 C16 C15 -177.6(2) . . . . ?
C11 P1 C21 C26 -80.3(3) . . . . ?
C41 P1 C21 C26 159.3(2) . . . . ?
C31 P1 C21 C26 41.9(3) . . . . ?
C11 P1 C21 C22 101.4(3) . . . . ?
C41 P1 C21 C22 -19.1(3) . . . . ?
C31 P1 C21 C22 -136.4(2) . . . . ?
C26 C21 C22 C23 -0.2(4) . . . . ?
P1 C21 C22 C23 178.0(2) . . . . ?
C21 C22 C23 C24 -0.1(4) . . . . ?
C22 C23 C24 C25 0.2(4) . . . . ?
C23 C24 C25 C26 0.1(4) . . . . ?
C24 C25 C26 C21 -0.4(4) . . . . ?
C22 C21 C26 C25 0.5(4) . . . . ?
P1 C21 C26 C25 -177.9(2) . . . . ?
C11 P1 C31 C32 -25.6(3) . . . . ?
C41 P1 C31 C32 93.5(2) . . . . ?
C21 P1 C31 C32 -147.3(2) . . . . ?
C11 P1 C31 C36 160.9(2) . . . . ?
C41 P1 C31 C36 -80.0(2) . . . . ?
C21 P1 C31 C36 39.2(2) . . . . ?
C36 C31 C32 C33 0.7(4) . . . . ?
P1 C31 C32 C33 -172.8(2) . . . . ?
C31 C32 C33 C34 -1.0(4) . . . . ?
C32 C33 C34 C35 0.4(4) . . . . ?
C33 C34 C35 C36 0.4(4) . . . . ?
C34 C35 C36 C31 -0.7(4) . . . . ?
C32 C31 C36 C35 0.1(4) . . . . ?
P1 C31 C36 C35 173.8(2) . . . . ?
C11 P1 C41 C42 123.7(2) . . . . ?
C31 P1 C41 C42 2.3(3) . . . . ?
C21 P1 C41 C42 -114.1(2) . . . . ?
C11 P1 C41 C46 -56.6(2) . . . . ?
C31 P1 C41 C46 -178.0(2) . . . . ?
C21 P1 C41 C46 65.6(2) . . . . ?
C46 C41 C42 C43 -1.1(4) . . . . ?
P1 C41 C42 C43 178.6(2) . . . . ?
C41 C42 C43 C44 -0.9(5) . . . . ?
C42 C43 C44 C45 2.0(5) . . . . ?
C43 C44 C45 C46 -1.0(4) . . . . ?
C44 C45 C46 C41 -0.9(4) . . . . ?
C42 C41 C46 C45 2.0(4) . . . . ?
P1 C41 C46 C45 -177.7(2) . . . . ?
C1 N1 B2 B7 129.5(3) . . . . ?
C1 N1 B2 B8 -161.7(3) . . . . ?
C1 N1 B2 B6 59.4(4) . . . . ?
C1 N1 B2 B1 -16.1(5) . . . . ?
C1 N1 B2 B3 -91.4(4) . . . . ?
B5 B1 B2 N1 147.6(3) . . . . ?
B4 B1 B2 N1 -148.6(3) . . . . ?
B3 B1 B2 N1 -111.1(3) . . . . ?
B6 B1 B2 N1 110.1(3) . . . . ?
B5 B1 B2 B7 -0.2(3) . . . . ?
B4 B1 B2 B7 63.7(3) . . . . ?
B3 B1 B2 B7 101.2(3) . . . . ?
B6 B1 B2 B7 -37.7(2) . . . . ?
B5 B1 B2 B8 -64.3(3) . . . . ?
B4 B1 B2 B8 -0.5(3) . . . . ?
B3 B1 B2 B8 37.1(2) . . . . ?
B6 B1 B2 B8 -101.8(3) . . . . ?
B5 B1 B2 B6 37.5(2) . . . . ?
B4 B1 B2 B6 101.3(2) . . . . ?
B3 B1 B2 B6 138.8(2) . . . . ?
B5 B1 B2 B3 -101.4(2) . . . . ?
B4 B1 B2 B3 -37.5(2) . . . . ?
B6 B1 B2 B3 -138.8(2) . . . . ?
B5 B1 B3 B4 -37.9(2) . . . . ?
B2 B1 B3 B4 -137.8(2) . . . . ?
B6 B1 B3 B4 -101.0(2) . . . . ?
B5 B1 B3 B9 -0.2(3) . . . . ?
B4 B1 B3 B9 37.6(2) . . . . ?
B2 B1 B3 B9 -100.2(3) . . . . ?
B6 B1 B3 B9 -63.4(3) . . . . ?
B5 B1 B3 B8 63.0(3) . . . . ?
B4 B1 B3 B8 100.9(3) . . . . ?
B2 B1 B3 B8 -36.9(2) . . . . ?
B6 B1 B3 B8 -0.1(3) . . . . ?
B5 B1 B3 B2 100.0(2) . . . . ?
B4 B1 B3 B2 137.8(2) . . . . ?
B6 B1 B3 B2 36.8(2) . . . . ?
N1 B2 B3 B4 154.9(3) . . . . ?
B7 B2 B3 B4 -63.4(3) . . . . ?
B8 B2 B3 B4 -100.8(3) . . . . ?
B6 B2 B3 B4 0.6(3) . . . . ?
B1 B2 B3 B4 37.7(2) . . . . ?
N1 B2 B3 B9 -141.8(3) . . . . ?
B7 B2 B3 B9 -0.1(3) . . . . ?
B8 B2 B3 B9 -37.6(2) . . . . ?
B6 B2 B3 B9 63.9(3) . . . . ?
B1 B2 B3 B9 101.0(2) . . . . ?
N1 B2 B3 B8 -104.3(3) . . . . ?
B7 B2 B3 B8 37.4(2) . . . . ?
B6 B2 B3 B8 101.4(3) . . . . ?
B1 B2 B3 B8 138.5(2) . . . . ?
N1 B2 B3 B1 117.2(3) . . . . ?
B7 B2 B3 B1 -101.1(3) . . . . ?
B8 B2 B3 B1 -138.5(2) . . . . ?
B6 B2 B3 B1 -37.1(2) . . . . ?
B8 B3 B4 B9 37.1(2) . . . . ?
B1 B3 B4 B9 137.9(3) . . . . ?
B2 B3 B4 B9 100.2(3) . . . . ?
B9 B3 B4 B1 -137.9(3) . . . . ?
B8 B3 B4 B1 -100.8(3) . . . . ?
B2 B3 B4 B1 -37.7(2) . . . . ?
B9 B3 B4 B10 -37.6(2) . . . . ?
B8 B3 B4 B10 -0.5(3) . . . . ?
B1 B3 B4 B10 100.3(3) . . . . ?
B2 B3 B4 B10 62.6(3) . . . . ?
B9 B3 B4 B5 -100.5(3) . . . . ?
B8 B3 B4 B5 -63.4(3) . . . . ?
B1 B3 B4 B5 37.4(2) . . . . ?
B2 B3 B4 B5 -0.3(3) . . . . ?
B5 B1 B4 B3 138.0(2) . . . . ?
B2 B1 B4 B3 37.7(2) . . . . ?
B6 B1 B4 B3 100.9(3) . . . . ?
B5 B1 B4 B9 100.3(3) . . . . ?
B3 B1 B4 B9 -37.7(2) . . . . ?
B2 B1 B4 B9 0.0(3) . . . . ?
B6 B1 B4 B9 63.2(3) . . . . ?
B5 B1 B4 B10 36.9(2) . . . . ?
B3 B1 B4 B10 -101.1(3) . . . . ?
B2 B1 B4 B10 -63.5(3) . . . . ?
B6 B1 B4 B10 -0.2(3) . . . . ?
B3 B1 B4 B5 -138.0(2) . . . . ?
B2 B1 B4 B5 -100.3(2) . . . . ?
B6 B1 B4 B5 -37.1(2) . . . . ?
B4 B1 B5 B11 -100.8(3) . . . . ?
B3 B1 B5 B11 -63.3(3) . . . . ?
B2 B1 B5 B11 0.2(3) . . . . ?
B6 B1 B5 B11 37.7(2) . . . . ?
B4 B1 B5 B10 -37.1(2) . . . . ?
B3 B1 B5 B10 0.4(3) . . . . ?
B2 B1 B5 B10 63.8(3) . . . . ?
B6 B1 B5 B10 101.3(3) . . . . ?
B4 B1 B5 B6 -138.5(2) . . . . ?
B3 B1 B5 B6 -101.0(3) . . . . ?
B2 B1 B5 B6 -37.5(2) . . . . ?
B3 B1 B5 B4 37.5(2) . . . . ?
B2 B1 B5 B4 100.9(3) . . . . ?
B6 B1 B5 B4 138.5(2) . . . . ?
B3 B4 B5 B11 63.3(3) . . . . ?
B9 B4 B5 B11 -0.1(3) . . . . ?
B1 B4 B5 B11 100.9(3) . . . . ?
B10 B4 B5 B11 -37.6(2) . . . . ?
B3 B4 B5 B10 100.8(3) . . . . ?
B9 B4 B5 B10 37.5(2) . . . . ?
B1 B4 B5 B10 138.4(2) . . . . ?
B3 B4 B5 B6 0.0(3) . . . . ?
B9 B4 B5 B6 -63.4(3) . . . . ?
B1 B4 B5 B6 37.6(2) . . . . ?
B10 B4 B5 B6 -100.9(3) . . . . ?
B3 B4 B5 B1 -37.6(2) . . . . ?
B9 B4 B5 B1 -101.0(2) . . . . ?
B10 B4 B5 B1 -138.4(2) . . . . ?
B10 B5 B6 B11 37.0(2) . . . . ?
B1 B5 B6 B11 137.7(3) . . . . ?
B4 B5 B6 B11 100.6(2) . . . . ?
B11 B5 B6 B2 -100.2(3) . . . . ?
B10 B5 B6 B2 -63.1(3) . . . . ?
B1 B5 B6 B2 37.6(2) . . . . ?
B4 B5 B6 B2 0.4(3) . . . . ?
B11 B5 B6 B7 -37.6(2) . . . . ?
B10 B5 B6 B7 -0.6(3) . . . . ?
B1 B5 B6 B7 100.1(2) . . . . ?
B4 B5 B6 B7 63.0(3) . . . . ?
B11 B5 B6 B1 -137.7(3) . . . . ?
B10 B5 B6 B1 -100.7(3) . . . . ?
B4 B5 B6 B1 -37.2(2) . . . . ?
N1 B2 B6 B11 141.6(3) . . . . ?
B7 B2 B6 B11 37.5(2) . . . . ?
B8 B2 B6 B11 -0.2(3) . . . . ?
B1 B2 B6 B11 -100.6(3) . . . . ?
B3 B2 B6 B11 -63.8(3) . . . . ?
N1 B2 B6 B5 -155.2(3) . . . . ?
B7 B2 B6 B5 100.7(2) . . . . ?
B8 B2 B6 B5 63.0(3) . . . . ?
B1 B2 B6 B5 -37.5(2) . . . . ?
B3 B2 B6 B5 -0.6(3) . . . . ?
N1 B2 B6 B7 104.1(3) . . . . ?
B8 B2 B6 B7 -37.7(2) . . . . ?
B1 B2 B6 B7 -138.2(2) . . . . ?
B3 B2 B6 B7 -101.3(3) . . . . ?
N1 B2 B6 B1 -117.7(3) . . . . ?
B7 B2 B6 B1 138.2(2) . . . . ?
B8 B2 B6 B1 100.5(3) . . . . ?
B3 B2 B6 B1 36.9(2) . . . . ?
B5 B1 B6 B11 -37.7(2) . . . . ?
B4 B1 B6 B11 -0.2(3) . . . . ?
B3 B1 B6 B11 63.1(3) . . . . ?
B2 B1 B6 B11 100.1(3) . . . . ?
B4 B1 B6 B5 37.5(2) . . . . ?
B3 B1 B6 B5 100.8(2) . . . . ?
B2 B1 B6 B5 137.7(2) . . . . ?
B5 B1 B6 B2 -137.7(2) . . . . ?
B4 B1 B6 B2 -100.2(3) . . . . ?
B3 B1 B6 B2 -36.9(2) . . . . ?
B5 B1 B6 B7 -100.8(2) . . . . ?
B4 B1 B6 B7 -63.3(3) . . . . ?
B3 B1 B6 B7 0.0(3) . . . . ?
B2 B1 B6 B7 36.9(2) . . . . ?
N1 B2 B7 B11 -151.6(2) . . . . ?
B8 B2 B7 B11 100.8(3) . . . . ?
B6 B2 B7 B11 -37.5(2) . . . . ?
B1 B2 B7 B11 0.1(3) . . . . ?
B3 B2 B7 B11 63.6(3) . . . . ?
N1 B2 B7 B8 107.6(3) . . . . ?
B6 B2 B7 B8 -138.3(2) . . . . ?
B1 B2 B7 B8 -100.7(3) . . . . ?
B3 B2 B7 B8 -37.2(2) . . . . ?
N1 B2 B7 B6 -114.1(3) . . . . ?
B8 B2 B7 B6 138.3(2) . . . . ?
B1 B2 B7 B6 37.7(2) . . . . ?
B3 B2 B7 B6 101.2(3) . . . . ?
N1 B2 B7 B12 144.9(3) . . . . ?
B8 B2 B7 B12 37.3(2) . . . . ?
B6 B2 B7 B12 -101.0(3) . . . . ?
B1 B2 B7 B12 -63.3(3) . . . . ?
B3 B2 B7 B12 0.2(3) . . . . ?
B11 B6 B7 B2 -137.7(3) . . . . ?
B5 B6 B7 B2 -100.1(3) . . . . ?
B1 B6 B7 B2 -37.1(2) . . . . ?
B5 B6 B7 B11 37.7(2) . . . . ?
B2 B6 B7 B11 137.7(3) . . . . ?
B1 B6 B7 B11 100.6(3) . . . . ?
B11 B6 B7 B8 -100.5(3) . . . . ?
B5 B6 B7 B8 -62.8(3) . . . . ?
B2 B6 B7 B8 37.3(2) . . . . ?
B1 B6 B7 B8 0.1(3) . . . . ?
B11 B6 B7 B12 -37.0(2) . . . . ?
B5 B6 B7 B12 0.6(3) . . . . ?
B2 B6 B7 B12 100.7(3) . . . . ?
B1 B6 B7 B12 63.5(3) . . . . ?
N1 B2 B8 B9 152.7(2) . . . . ?
B7 B2 B8 B9 -100.8(3) . . . . ?
B6 B2 B8 B9 -63.2(3) . . . . ?
B1 B2 B8 B9 0.8(3) . . . . ?
B3 B2 B8 B9 37.8(2) . . . . ?
N1 B2 B8 B3 114.9(3) . . . . ?
B7 B2 B8 B3 -138.6(2) . . . . ?
B6 B2 B8 B3 -101.0(3) . . . . ?
B1 B2 B8 B3 -37.0(2) . . . . ?
N1 B2 B8 B12 -143.9(3) . . . . ?
B7 B2 B8 B12 -37.3(2) . . . . ?
B6 B2 B8 B12 0.3(3) . . . . ?
B1 B2 B8 B12 64.2(3) . . . . ?
B3 B2 B8 B12 101.3(3) . . . . ?
N1 B2 B8 B7 -106.6(3) . . . . ?
B6 B2 B8 B7 37.6(2) . . . . ?
B1 B2 B8 B7 101.6(2) . . . . ?
B3 B2 B8 B7 138.6(2) . . . . ?
B4 B3 B8 B2 100.6(3) . . . . ?
B9 B3 B8 B2 137.7(3) . . . . ?
B1 B3 B8 B2 37.1(2) . . . . ?
B4 B3 B8 B9 -37.2(2) . . . . ?
B1 B3 B8 B9 -100.6(2) . . . . ?
B2 B3 B8 B9 -137.7(3) . . . . ?
B4 B3 B8 B12 0.1(3) . . . . ?
B9 B3 B8 B12 37.3(2) . . . . ?
B1 B3 B8 B12 -63.3(3) . . . . ?
B2 B3 B8 B12 -100.5(3) . . . . ?
B4 B3 B8 B7 63.7(3) . . . . ?
B9 B3 B8 B7 100.8(3) . . . . ?
B1 B3 B8 B7 0.2(3) . . . . ?
B2 B3 B8 B7 -36.9(2) . . . . ?
B11 B7 B8 B2 -100.5(3) . . . . ?
B6 B7 B8 B2 -37.5(2) . . . . ?
B12 B7 B8 B2 -138.2(3) . . . . ?
B2 B7 B8 B9 100.8(3) . . . . ?
B11 B7 B8 B9 0.3(3) . . . . ?
B6 B7 B8 B9 63.3(3) . . . . ?
B12 B7 B8 B9 -37.4(2) . . . . ?
B2 B7 B8 B3 37.3(2) . . . . ?
B11 B7 B8 B3 -63.2(3) . . . . ?
B6 B7 B8 B3 -0.2(3) . . . . ?
B12 B7 B8 B3 -100.9(3) . . . . ?
B2 B7 B8 B12 138.2(3) . . . . ?
B11 B7 B8 B12 37.7(2) . . . . ?
B6 B7 B8 B12 100.7(3) . . . . ?
B2 B8 B9 B4 -0.8(3) . . . . ?
B3 B8 B9 B4 37.2(2) . . . . ?
B12 B8 B9 B4 -101.2(3) . . . . ?
B7 B8 B9 B4 -63.9(3) . . . . ?
B2 B8 B9 B3 -38.0(2) . . . . ?
B12 B8 B9 B3 -138.4(3) . . . . ?
B7 B8 B9 B3 -101.0(3) . . . . ?
B2 B8 B9 B12 100.4(3) . . . . ?
B3 B8 B9 B12 138.4(3) . . . . ?
B7 B8 B9 B12 37.4(2) . . . . ?
B2 B8 B9 B10 62.9(3) . . . . ?
B3 B8 B9 B10 100.8(3) . . . . ?
B12 B8 B9 B10 -37.6(2) . . . . ?
B7 B8 B9 B10 -0.2(3) . . . . ?
B3 B4 B9 B8 -37.2(2) . . . . ?
B1 B4 B9 B8 0.5(3) . . . . ?
B10 B4 B9 B8 100.8(3) . . . . ?
B5 B4 B9 B8 63.5(3) . . . . ?
B1 B4 B9 B3 37.7(2) . . . . ?
B10 B4 B9 B3 138.0(3) . . . . ?
B5 B4 B9 B3 100.8(2) . . . . ?
B3 B4 B9 B12 -101.1(3) . . . . ?
B1 B4 B9 B12 -63.3(3) . . . . ?
B10 B4 B9 B12 36.9(2) . . . . ?
B5 B4 B9 B12 -0.3(3) . . . . ?
B3 B4 B9 B10 -138.0(3) . . . . ?
B1 B4 B9 B10 -100.2(3) . . . . ?
B5 B4 B9 B10 -37.2(2) . . . . ?
B4 B3 B9 B8 138.5(3) . . . . ?
B1 B3 B9 B8 100.8(3) . . . . ?
B2 B3 B9 B8 37.5(2) . . . . ?
B8 B3 B9 B4 -138.5(3) . . . . ?
B1 B3 B9 B4 -37.6(2) . . . . ?
B2 B3 B9 B4 -101.0(3) . . . . ?
B4 B3 B9 B12 101.0(3) . . . . ?
B8 B3 B9 B12 -37.4(2) . . . . ?
B1 B3 B9 B12 63.4(3) . . . . ?
B2 B3 B9 B12 0.0(3) . . . . ?
B4 B3 B9 B10 37.6(2) . . . . ?
B8 B3 B9 B10 -100.8(3) . . . . ?
B1 B3 B9 B10 0.0(3) . . . . ?
B2 B3 B9 B10 -63.4(3) . . . . ?
B11 B5 B10 B12 37.2(2) . . . . ?
B6 B5 B10 B12 0.3(3) . . . . ?
B1 B5 B10 B12 -63.9(3) . . . . ?
B4 B5 B10 B12 -100.9(3) . . . . ?
B6 B5 B10 B11 -36.9(2) . . . . ?
B1 B5 B10 B11 -101.0(3) . . . . ?
B4 B5 B10 B11 -138.1(2) . . . . ?
B11 B5 B10 B9 100.7(3) . . . . ?
B6 B5 B10 B9 63.8(3) . . . . ?
B1 B5 B10 B9 -0.4(3) . . . . ?
B4 B5 B10 B9 -37.4(2) . . . . ?
B11 B5 B10 B4 138.1(2) . . . . ?
B6 B5 B10 B4 101.2(3) . . . . ?
B1 B5 B10 B4 37.0(2) . . . . ?
B8 B9 B10 B5 -63.3(3) . . . . ?
B4 B9 B10 B5 37.7(2) . . . . ?
B3 B9 B10 B5 0.2(3) . . . . ?
B12 B9 B10 B5 -101.0(3) . . . . ?
B8 B9 B10 B12 37.7(2) . . . . ?
B4 B9 B10 B12 138.8(3) . . . . ?
B3 B9 B10 B12 101.2(3) . . . . ?
B8 B9 B10 B11 0.0(3) . . . . ?
B4 B9 B10 B11 101.0(3) . . . . ?
B3 B9 B10 B11 63.5(3) . . . . ?
B12 B9 B10 B11 -37.8(2) . . . . ?
B8 B9 B10 B4 -101.0(3) . . . . ?
B3 B9 B10 B4 -37.5(2) . . . . ?
B12 B9 B10 B4 -138.8(3) . . . . ?
B3 B4 B10 B5 -100.5(3) . . . . ?
B9 B4 B10 B5 -138.0(3) . . . . ?
B1 B4 B10 B5 -36.9(2) . . . . ?
B3 B4 B10 B12 0.7(3) . . . . ?
B9 B4 B10 B12 -36.9(2) . . . . ?
B1 B4 B10 B12 64.2(3) . . . . ?
B5 B4 B10 B12 101.1(3) . . . . ?
B3 B4 B10 B11 -63.0(3) . . . . ?
B9 B4 B10 B11 -100.6(3) . . . . ?
B1 B4 B10 B11 0.5(3) . . . . ?
B5 B4 B10 B11 37.4(2) . . . . ?
B3 B4 B10 B9 37.6(2) . . . . ?
B1 B4 B10 B9 101.1(3) . . . . ?
B5 B4 B10 B9 138.0(3) . . . . ?
B2 B6 B11 B5 100.5(3) . . . . ?
B7 B6 B11 B5 137.8(2) . . . . ?
B1 B6 B11 B5 37.5(2) . . . . ?
B5 B6 B11 B7 -137.8(2) . . . . ?
B2 B6 B11 B7 -37.3(2) . . . . ?
B1 B6 B11 B7 -100.3(3) . . . . ?
B5 B6 B11 B10 -37.0(2) . . . . ?
B2 B6 B11 B10 63.5(3) . . . . ?
B7 B6 B11 B10 100.8(3) . . . . ?
B1 B6 B11 B10 0.5(3) . . . . ?
B5 B6 B11 B12 -100.5(3) . . . . ?
B2 B6 B11 B12 0.0(3) . . . . ?
B7 B6 B11 B12 37.3(2) . . . . ?
B1 B6 B11 B12 -63.0(3) . . . . ?
B10 B5 B11 B6 -138.8(2) . . . . ?
B1 B5 B11 B6 -38.1(2) . . . . ?
B4 B5 B11 B6 -101.3(2) . . . . ?
B10 B5 B11 B7 -100.7(3) . . . . ?
B6 B5 B11 B7 38.0(2) . . . . ?
B1 B5 B11 B7 -0.1(3) . . . . ?
B4 B5 B11 B7 -63.3(3) . . . . ?
B6 B5 B11 B10 138.8(2) . . . . ?
B1 B5 B11 B10 100.7(3) . . . . ?
B4 B5 B11 B10 37.5(2) . . . . ?
B10 B5 B11 B12 -37.0(2) . . . . ?
B6 B5 B11 B12 101.8(3) . . . . ?
B1 B5 B11 B12 63.7(3) . . . . ?
B4 B5 B11 B12 0.5(3) . . . . ?
B2 B7 B11 B6 37.8(2) . . . . ?
B8 B7 B11 B6 101.0(2) . . . . ?
B12 B7 B11 B6 138.7(3) . . . . ?
B2 B7 B11 B5 0.0(3) . . . . ?
B8 B7 B11 B5 63.1(3) . . . . ?
B6 B7 B11 B5 -37.9(2) . . . . ?
B12 B7 B11 B5 100.8(3) . . . . ?
B2 B7 B11 B10 -63.5(3) . . . . ?
B8 B7 B11 B10 -0.4(3) . . . . ?
B6 B7 B11 B10 -101.4(3) . . . . ?
B12 B7 B11 B10 37.3(2) . . . . ?
B2 B7 B11 B12 -100.8(3) . . . . ?
B8 B7 B11 B12 -37.6(2) . . . . ?
B6 B7 B11 B12 -138.7(3) . . . . ?
B5 B10 B11 B6 37.1(2) . . . . ?
B12 B10 B11 B6 -101.5(3) . . . . ?
B9 B10 B11 B6 -63.8(3) . . . . ?
B4 B10 B11 B6 -0.6(3) . . . . ?
B12 B10 B11 B5 -138.6(2) . . . . ?
B9 B10 B11 B5 -100.9(3) . . . . ?
B4 B10 B11 B5 -37.7(2) . . . . ?
B5 B10 B11 B7 101.2(2) . . . . ?
B12 B10 B11 B7 -37.4(2) . . . . ?
B9 B10 B11 B7 0.3(3) . . . . ?
B4 B10 B11 B7 63.4(3) . . . . ?
B5 B10 B11 B12 138.6(2) . . . . ?
B9 B10 B11 B12 37.7(2) . . . . ?
B4 B10 B11 B12 100.9(3) . . . . ?
B5 B10 B12 B9 100.8(3) . . . . ?
B11 B10 B12 B9 137.8(2) . . . . ?
B4 B10 B12 B9 36.8(2) . . . . ?
B5 B10 B12 B11 -37.0(2) . . . . ?
B9 B10 B12 B11 -137.8(2) . . . . ?
B4 B10 B12 B11 -101.0(3) . . . . ?
B5 B10 B12 B8 63.4(3) . . . . ?
B11 B10 B12 B8 100.4(3) . . . . ?
B9 B10 B12 B8 -37.4(2) . . . . ?
B4 B10 B12 B8 -0.6(3) . . . . ?
B5 B10 B12 B7 0.1(3) . . . . ?
B11 B10 B12 B7 37.1(2) . . . . ?
B9 B10 B12 B7 -100.7(3) . . . . ?
B4 B10 B12 B7 -63.9(3) . . . . ?
B8 B9 B12 B10 -137.9(3) . . . . ?
B4 B9 B12 B10 -37.1(2) . . . . ?
B3 B9 B12 B10 -100.6(3) . . . . ?
B8 B9 B12 B11 -100.3(3) . . . . ?
B4 B9 B12 B11 0.6(3) . . . . ?
B3 B9 B12 B11 -62.9(3) . . . . ?
B10 B9 B12 B11 37.7(2) . . . . ?
B4 B9 B12 B8 100.9(3) . . . . ?
B3 B9 B12 B8 37.3(2) . . . . ?
B10 B9 B12 B8 137.9(3) . . . . ?
B8 B9 B12 B7 -37.3(2) . . . . ?
B4 B9 B12 B7 63.6(3) . . . . ?
B3 B9 B12 B7 0.1(3) . . . . ?
B10 B9 B12 B7 100.6(3) . . . . ?
B6 B11 B12 B10 100.9(3) . . . . ?
B5 B11 B12 B10 37.0(2) . . . . ?
B7 B11 B12 B10 138.3(2) . . . . ?
B6 B11 B12 B9 63.2(3) . . . . ?
B5 B11 B12 B9 -0.7(3) . . . . ?
B7 B11 B12 B9 100.6(2) . . . . ?
B10 B11 B12 B9 -37.7(2) . . . . ?
B6 B11 B12 B8 0.2(3) . . . . ?
B5 B11 B12 B8 -63.6(3) . . . . ?
B7 B11 B12 B8 37.6(2) . . . . ?
B10 B11 B12 B8 -100.7(2) . . . . ?
B6 B11 B12 B7 -37.4(2) . . . . ?
B5 B11 B12 B7 -101.2(2) . . . . ?
B10 B11 B12 B7 -138.3(2) . . . . ?
B2 B8 B12 B10 -63.5(3) . . . . ?
B9 B8 B12 B10 37.6(2) . . . . ?
B3 B8 B12 B10 0.3(3) . . . . ?
B7 B8 B12 B10 -100.7(3) . . . . ?
B2 B8 B12 B9 -101.1(3) . . . . ?
B3 B8 B12 B9 -37.3(2) . . . . ?
B7 B8 B12 B9 -138.2(3) . . . . ?
B2 B8 B12 B11 -0.3(3) . . . . ?
B9 B8 B12 B11 100.8(3) . . . . ?
B3 B8 B12 B11 63.6(3) . . . . ?
B7 B8 B12 B11 -37.4(2) . . . . ?
B2 B8 B12 B7 37.1(2) . . . . ?
B9 B8 B12 B7 138.2(3) . . . . ?
B3 B8 B12 B7 101.0(3) . . . . ?
B2 B7 B12 B10 63.3(3) . . . . ?
B11 B7 B12 B10 -37.2(2) . . . . ?
B8 B7 B12 B10 100.6(3) . . . . ?
B6 B7 B12 B10 -0.4(3) . . . . ?
B2 B7 B12 B9 -0.1(3) . . . . ?
B11 B7 B12 B9 -100.7(3) . . . . ?
B8 B7 B12 B9 37.1(2) . . . . ?
B6 B7 B12 B9 -63.9(3) . . . . ?
B2 B7 B12 B11 100.6(3) . . . . ?
B8 B7 B12 B11 137.8(2) . . . . ?
B6 B7 B12 B11 36.8(2) . . . . ?
B2 B7 B12 B8 -37.3(2) . . . . ?
B11 B7 B12 B8 -137.8(2) . . . . ?
B6 B7 B12 B8 -101.0(2) . . . . ?
 
_refine_diff_density_max    0.297
_refine_diff_density_min   -0.297
_refine_diff_density_rms    0.060

_shelxl_version_number 2014-3

_shelx_res_file
;
TITL zh108 in P2(1)/c
CELL 0.71073 16.137 14.573 16.905 90.000 116.783 90.000
ZERR 4.00     0.004  0.003  0.004  0.000   0.004  0.000
LATT 1
SYMM -x, y+1/2, -z+1/2
SFAC C    H    B   N  P
UNIT 128  188  48  8  4
L.S. 8
ACTA
CONF
BOND $H
FMAP 2
PLAN 20
SIZE 0.02 0.18 0.20
TEMP -173
HTAB
SHEL 5 0.5
OMIT -2 55
OMIT    -6   2   2
OMIT     2   7   6
WGHT    0.047300
FVAR       0.15363
P1    5    0.875057    0.608583    0.302122    11.00000    0.01323    0.02321 =
         0.02283    0.00022    0.00889    0.00086
N1    4    0.475981    0.427290    0.350171    11.00000    0.01876    0.02565 =
         0.02472    0.00096    0.00965    0.00327
AFIX  43
H1A   2    0.503958    0.426216    0.408471    11.00000   -1.20000
AFIX   0
N2    4    0.489757    0.387302    0.226081    11.00000    0.01775    0.03574 =
         0.02781    0.00165    0.01068    0.00884
AFIX  43
H2A   2    0.433127    0.408711    0.195374    11.00000   -1.20000
AFIX   0
C1    1    0.521983    0.386745    0.313047    11.00000    0.01800    0.02052 =
         0.03269    0.00162    0.01116   -0.00117
C2    1    0.611644    0.339476    0.369830    11.00000    0.02158    0.03027 =
         0.03496    0.00456    0.01138    0.00797
AFIX 137
H2B   2    0.625296    0.345434    0.432261    11.00000   -1.50000
H2C   2    0.661731    0.367669    0.360582    11.00000   -1.50000
H2D   2    0.606644    0.274358    0.353847    11.00000   -1.50000
AFIX   0
C3    1    0.537287    0.356461    0.174920    11.00000    0.01683    0.02298 =
         0.03098   -0.00118    0.01179    0.00342
AFIX  13
H3A   2    0.579742    0.304473    0.206668    11.00000   -1.20000
AFIX   0
C4    1    0.593927    0.435346    0.165016    11.00000    0.02121    0.02787 =
         0.03858    0.00220    0.01511    0.00356
AFIX  23
H4A   2    0.552932    0.489011    0.139081    11.00000   -1.20000
H4B   2    0.642720    0.453226    0.224255    11.00000   -1.20000
AFIX   0
C5    1    0.639078    0.409043    0.106172    11.00000    0.03250    0.03302 =
         0.04759    0.00015    0.02550   -0.00289
AFIX  23
H5A   2    0.686478    0.361105    0.136059    11.00000   -1.20000
H5B   2    0.670745    0.463325    0.097172    11.00000   -1.20000
AFIX   0
C6    1    0.567557    0.373337    0.016404    11.00000    0.04831    0.03487 =
         0.03747    0.00351    0.02630    0.00941
AFIX  23
H6A   2    0.525542    0.424040   -0.017071    11.00000   -1.20000
H6B   2    0.599802    0.351683   -0.017955    11.00000   -1.20000
AFIX   0
C7    1    0.510705    0.295292    0.026394    11.00000    0.03297    0.03371 =
         0.03023   -0.00344    0.01166    0.00805
AFIX  23
H7A   2    0.551316    0.241507    0.052926    11.00000   -1.20000
H7B   2    0.461824    0.277203   -0.032727    11.00000   -1.20000
AFIX   0
C8    1    0.465857    0.324055    0.085087    11.00000    0.02382    0.03347 =
         0.03164   -0.00288    0.01028   -0.00152
AFIX  23
H8A   2    0.420836    0.374028    0.055630    11.00000   -1.20000
H8B   2    0.431404    0.271365    0.092728    11.00000   -1.20000
AFIX   0
C11   1    0.956737    0.695559    0.362712    11.00000    0.01914    0.01840 =
         0.02395    0.00016    0.00849   -0.00132
C12   1    0.945874    0.749371    0.425637    11.00000    0.03347    0.03010 =
         0.02992   -0.00065    0.01821   -0.00390
AFIX  43
H12A  2    0.893464    0.740913    0.436412    11.00000   -1.20000
AFIX   0
C13   1    1.011545    0.814934    0.472170    11.00000    0.05439    0.03391 =
         0.03211   -0.01267    0.02325   -0.01597
AFIX  43
H13A  2    1.003906    0.852293    0.514474    11.00000   -1.20000
AFIX   0
C14   1    1.088314    0.826332    0.457360    11.00000    0.04090    0.03621 =
         0.03248   -0.00076    0.00936   -0.01798
AFIX  43
H14A  2    1.134562    0.869858    0.491286    11.00000   -1.20000
AFIX   0
C15   1    1.098436    0.774952    0.393599    11.00000    0.02637    0.03652 =
         0.04018   -0.00137    0.01322   -0.01060
AFIX  43
H15A  2    1.150831    0.783939    0.382904    11.00000   -1.20000
AFIX   0
C16   1    1.032008    0.710409    0.345425    11.00000    0.02374    0.02855 =
         0.03298   -0.00201    0.01475   -0.00407
AFIX  43
H16A  2    1.037865    0.676142    0.300399    11.00000   -1.20000
AFIX   0
C21   1    0.776568    0.610773    0.324747    11.00000    0.01420    0.02260 =
         0.02255   -0.00290    0.00945   -0.00236
C22   1    0.692036    0.649905    0.266576    11.00000    0.01911    0.02523 =
         0.02956   -0.00144    0.01162   -0.00168
AFIX  43
H22A  2    0.685015    0.678546    0.213431    11.00000   -1.20000
AFIX   0
C23   1    0.618335    0.646297    0.287641    11.00000    0.01644    0.02820 =
         0.03681    0.00007    0.01289    0.00207
AFIX  43
H23A  2    0.560502    0.672859    0.248451    11.00000   -1.20000
AFIX   0
C24   1    0.627650    0.604873    0.364372    11.00000    0.02223    0.02447 =
         0.03807   -0.00727    0.02043   -0.00279
AFIX  43
H24A  2    0.576460    0.602815    0.377736    11.00000   -1.20000
AFIX   0
C25   1    0.711724    0.566198    0.422069    11.00000    0.02874    0.02967 =
         0.02777   -0.00096    0.01615   -0.00232
AFIX  43
H25A  2    0.718309    0.537519    0.475055    11.00000   -1.20000
AFIX   0
C26   1    0.786113    0.569406    0.402395    11.00000    0.01948    0.03027 =
         0.02666   -0.00240    0.01173   -0.00133
AFIX  43
H26A  2    0.843923    0.543218    0.442143    11.00000   -1.20000
AFIX   0
C31   1    0.924042    0.496287    0.330844    11.00000    0.01466    0.02110 =
         0.02162   -0.00203    0.00826   -0.00218
C32   1    1.018962    0.481197    0.364190    11.00000    0.02016    0.02380 =
         0.02812   -0.00144    0.01268   -0.00380
AFIX  43
H32A  2    1.060447    0.531718    0.378633    11.00000   -1.20000
AFIX   0
C33   1    1.052744    0.392526    0.376247    11.00000    0.01689    0.02721 =
         0.03216    0.00388    0.01227    0.00430
AFIX  43
H33A  2    1.117514    0.382409    0.398149    11.00000   -1.20000
AFIX   0
C34   1    0.993686    0.318762    0.356907    11.00000    0.02582    0.02188 =
         0.03215    0.00142    0.01515    0.00172
AFIX  43
H34A  2    1.017953    0.258170    0.365922    11.00000   -1.20000
AFIX   0
C35   1    0.899772    0.332178    0.324615    11.00000    0.02305    0.02420 =
         0.03793   -0.00190    0.01422   -0.00419
AFIX  43
H35A  2    0.859201    0.281053    0.311677    11.00000   -1.20000
AFIX   0
C36   1    0.864513    0.420563    0.311012    11.00000    0.01644    0.02405 =
         0.03531   -0.00001    0.01178   -0.00103
AFIX  43
H36A  2    0.799515    0.429911    0.288075    11.00000   -1.20000
AFIX   0
C41   1    0.840163    0.626078    0.187014    11.00000    0.01329    0.02498 =
         0.02014   -0.00027    0.00776   -0.00184
C42   1    0.850070    0.556736    0.135465    11.00000    0.03741    0.03050 =
         0.03293    0.00151    0.02223    0.00503
AFIX  43
H42A  2    0.876919    0.499610    0.161486    11.00000   -1.20000
AFIX   0
C43   1    0.820615    0.571540    0.046267    11.00000    0.04947    0.03861 =
         0.03448   -0.00579    0.02436    0.00405
AFIX  43
H43A  2    0.828112    0.524558    0.011062    11.00000   -1.20000
AFIX   0
C44   1    0.780290    0.653947    0.007425    11.00000    0.02766    0.03921 =
         0.02396   -0.00152    0.01286   -0.00490
AFIX  43
H44A  2    0.758435    0.662859   -0.054436    11.00000   -1.20000
AFIX   0
C45   1    0.772045    0.722783    0.058834    11.00000    0.01329    0.03201 =
         0.02821    0.00357    0.00707   -0.00382
AFIX  43
H45A  2    0.745277    0.779764    0.032325    11.00000   -1.20000
AFIX   0
C46   1    0.802102    0.710329    0.148450    11.00000    0.01801    0.02370 =
         0.02881   -0.00078    0.01235   -0.00464
AFIX  43
H46A  2    0.796951    0.758687    0.183664    11.00000   -1.20000
AFIX   0
B1    3    0.317926    0.516338    0.198491    11.00000    0.01835    0.02581 =
         0.02824    0.00200    0.01503    0.00223
H1    2    0.343528    0.510766    0.147473    11.00000   -1.20000
B2    3    0.381621    0.476423    0.309602    11.00000    0.02030    0.02715 =
         0.02794    0.00229    0.01286   -0.00012
B3    3    0.368373    0.596542    0.286945    11.00000    0.01676    0.02308 =
         0.03327    0.00129    0.01130   -0.00262
H3    2    0.426853    0.640319    0.294878    11.00000   -1.20000
B4    3    0.254873    0.615321    0.200998    11.00000    0.01778    0.02945 =
         0.02924    0.00388    0.01199    0.00483
H4    2    0.240114    0.675290    0.149129    11.00000   -1.20000
B5    3    0.198155    0.506191    0.170098    11.00000    0.01747    0.02993 =
         0.02348   -0.00210    0.01006   -0.00091
H5    2    0.142211    0.491308    0.096718    11.00000   -1.20000
B6    3    0.276474    0.420277    0.236749    11.00000    0.02165    0.02357 =
         0.02750   -0.00215    0.01345   -0.00185
H6    2    0.276659    0.346417    0.214306    11.00000   -1.20000
B7    3    0.301955    0.442478    0.349184    11.00000    0.02027    0.02534 =
         0.02838    0.00175    0.01486    0.00045
H7    2    0.321376    0.386503    0.401341    11.00000   -1.20000
B8    3    0.358328    0.551200    0.379734    11.00000    0.01975    0.02784 =
         0.02935   -0.00266    0.01043    0.00199
H8    2    0.415268    0.564582    0.449496    11.00000   -1.20000
B9    3    0.279454    0.636247    0.312790    11.00000    0.01619    0.02434 =
         0.03612   -0.00526    0.01062   -0.00049
H9    2    0.279479    0.707119    0.337185    11.00000   -1.20000
B10   3    0.174182    0.580586    0.240365    11.00000    0.01940    0.02968 =
         0.02850   -0.00264    0.01331   -0.00027
H10   2    0.102796    0.615006    0.215358    11.00000   -1.20000
B11   3    0.188501    0.460858    0.262864    11.00000    0.01849    0.02562 =
         0.02668    0.00069    0.01057   -0.00097
H11   2    0.124446    0.415941    0.250725    11.00000   -1.20000
B12   3    0.238027    0.541578    0.351182    11.00000    0.01755    0.03099 =
         0.02377   -0.00185    0.01045    0.00043
H12   2    0.214781    0.553997    0.403602    11.00000   -1.20000

HKLF 4 1 1 0 0 0 1 0 0 0 1

REM  zh108 in P2(1)/c
REM R1 =  0.0633 for    3875 Fo > 4sig(Fo)  and  0.1663 for all    8076 data
REM    458 parameters refined using      0 restraints

END

WGHT      0.0475      0.0000

REM No hydrogen bonds found for HTAB generation

REM Highest difference peak  0.297,  deepest hole -0.297,  1-sigma level  0.060
Q1    1   0.8828  0.6815  0.3062  11.00000  0.05    0.30
Q2    1   0.8761  0.5370  0.3047  11.00000  0.05    0.27
Q3    1   0.9430  0.6417  0.3552  11.00000  0.05    0.24
Q4    1   0.3586  0.3883  0.4727  11.00000  0.05    0.24
Q5    1   0.7915  0.6785  0.3878  11.00000  0.05    0.23
Q6    1   1.0521  0.8315  0.2976  11.00000  0.05    0.23
Q7    1   0.1643  0.5599  0.4478  11.00000  0.05    0.22
Q8    1   0.9863  0.5119  0.4442  11.00000  0.05    0.22
Q9    1   0.9911  0.4852  0.2150  11.00000  0.05    0.22
Q10   1   0.4308  0.5142  0.2313  11.00000  0.05    0.21
Q11   1   0.3678  0.5827  0.4665  11.00000  0.05    0.21
Q12   1   0.6671  0.8323  0.0008  11.00000  0.05    0.21
Q13   1   0.9369  0.8677  0.4777  11.00000  0.05    0.21
Q14   1   0.9708  0.5864  0.4757  11.00000  0.05    0.21
Q15   1   0.3519  0.4758  0.3713  11.00000  0.05    0.21
Q16   1   0.2379  0.2938  0.1520  11.00000  0.05    0.20
Q17   1   0.8978  0.4578  0.3409  11.00000  0.05    0.20
Q18   1   0.7028  0.3293  0.0195  11.00000  0.05    0.20
Q19   1   0.6159  0.2486  0.4319  11.00000  0.05    0.20
Q20   1   0.9995  0.2936  0.4311  11.00000  0.05    0.20
;
_shelx_res_checksum    7467

_shelx_hkl_file
;
  -1   0   0   -0.12    0.16
  -1   0   0   -0.23    0.14
   1   0   0   -0.08    0.14
   1   0   0   -0.05    0.14
   2   0   0   -0.26    0.48
   2   0   0   -0.59    0.48
  -2   0   0   -0.11    0.47
  -2   0   0   -0.87    0.54
   3   0   0  133.38    5.73
  -3   0   0  131.82    5.75
   4   0   0    5.18    1.36
  -4   0   0    6.81    1.51
  -5   0   0    5.58    1.65
   5   0   0    6.57    1.53
   6   0   0   35.19    2.75
  -6   0   0   34.69    2.85
   7   0   0   29.67    2.63
  -7   0   0   31.61    2.68
  -8   0   0   85.37    4.77
   8   0   0   84.38    4.69
  -9   0   0    2.24    1.99
   9   0   0    0.77    1.73
  10   0   0   32.55    3.09
 -10   0   0   21.51    2.99
 -11   0   0    2.11    2.36
  11   0   0    4.87    2.14
 -12   0   0   78.31    5.47
  12   0   0   84.86    5.34
  13   0   0    4.45    2.48
 -13   0   0    0.37    2.78
  14   0   0   -3.16    2.37
 -14   0   0    3.15    2.94
  15   0   0    1.49    2.78
 -15   0   0   -3.72    2.79
 -16   0   0    1.68    3.26
  16   0   0    7.63    3.30
 -17   0   0   -3.41    3.15
  17   0   0    9.01    3.45
 -18   0   0    8.32    3.53
  18   0   0    2.75    3.49
  -1  -1   0   -0.88    0.26
   1  -1   0   -0.30    0.27
   1  -1   0   -0.44    0.28
  -1  -1   0   -0.58    0.23
  -1   1   0   -0.78    0.21
   1   1   0   -0.69    0.20
  -1   1   0   -0.81    0.22
   1   1   0   -0.47    0.19
  -2  -1   0   10.90    0.98
   3  -1   0  240.59    9.25
  -3  -1   0  217.73    9.24
   3   1   0  222.05    9.23
   3   1   0  206.89    9.19
  -3   1   0  221.37    9.21
  -3   1   0  223.14    9.25
   4  -1   0   30.71    2.29
  -4  -1   0   27.09    2.42
   4   1   0   28.76    2.22
  -4   1   0   29.22    2.46
  -5  -1   0   -0.09    1.44
   5  -1   0    0.50    1.32
   5   1   0    0.63    1.35
  -5   1   0    1.26    1.53
   6  -1   0   23.06    2.17
  -6  -1   0   23.39    2.28
   6   1   0   21.57    2.22
  -6   1   0   17.38    2.21
   7  -1   0   40.99    3.03
  -7  -1   0   42.97    3.23
   7   1   0   42.56    3.11
  -7   1   0   39.27    3.27
   8  -1   0    1.99    1.52
  -8  -1   0    3.14    1.84
  -8   1   0    2.05    1.83
   8   1   0    0.86    1.58
  -9  -1   0    4.00    2.04
   9  -1   0    0.41    1.66
   9   1   0    0.20    1.71
  -9   1   0    0.15    1.93
 -10  -1   0   16.57    2.70
  10  -1   0   14.46    2.39
  10   1   0   14.23    2.48
 -10   1   0   18.89    2.80
  11  -1   0    3.68    2.19
 -11  -1   0    0.97    2.36
  11   1   0    5.29    2.21
 -11   1   0    6.40    2.51
 -12  -1   0   40.96    4.14
  12  -1   0   46.46    4.13
 -12   1   0   41.28    4.10
  12   1   0   46.66    4.13
 -13  -1   0   58.96    4.69
  13  -1   0   55.90    4.75
 -13   1   0   51.85    4.76
  13   1   0   53.59    4.62
 -14  -1   0    7.08    3.05
  14  -1   0    8.88    2.93
 -14   1   0    8.72    3.16
  14   1   0    3.66    2.73
 -15  -1   0    6.95    3.30
  15  -1   0    5.68    2.95
 -15   1   0   10.84    3.41
  15   1   0    8.11    3.03
 -16  -1   0   -2.55    3.02
  16  -1   0    2.88    2.98
  16   1   0    0.18    2.98
 -16   1   0    5.30    3.42
  17  -1   0   -2.04    2.95
 -17  -1   0   -0.42    3.08
 -17   1   0   -0.55    3.28
  17   1   0    0.58    3.18
 -18  -1   0   -2.20    3.15
  18  -1   0    2.38    3.45
 -18   1   0    2.36    3.66
  18   1   0   -0.53    3.48
  -2  -2   0  384.62   14.89
   2  -2   0  405.22   14.92
   2   2   0  346.01   14.88
  -2   2   0  395.06   14.92
  -2   2   0  316.95   14.89
  -3  -2   0   12.23    1.42
   3  -2   0   15.23    1.37
  -3   2   0   14.51    1.40
   3   2   0   15.36    1.45
  -3   2   0   15.04    1.48
   3   2   0   16.02    1.40
  -4  -2   0  128.90    5.77
   4  -2   0  130.19    5.72
  -4   2   0  129.02    5.76
   4   2   0  124.43    5.73
  -5  -2   0   -0.27    1.45
   5  -2   0    0.04    1.26
   5   2   0    1.67    1.27
  -5   2   0    0.50    1.43
   6  -2   0   45.20    2.94
  -6  -2   0   43.32    3.08
   6   2   0   44.67    3.05
  -6   2   0   46.42    3.19
  -7  -2   0    1.69    1.70
   7  -2   0    1.67    1.41
   7   2   0    3.41    1.61
  -7   2   0    1.80    1.68
   8  -2   0    2.48    1.51
  -8  -2   0    0.55    1.80
   8   2   0   -1.65    1.50
  -8   2   0    2.02    1.87
   9  -2   0   14.37    2.18
  -9  -2   0   13.29    2.42
   9   2   0   15.05    2.30
  -9   2   0   13.28    2.38
 -10  -2   0    0.89    2.14
  10  -2   0   -3.28    1.69
 -10   2   0    1.65    2.10
  10   2   0    0.05    1.84
  11  -2   0   -1.01    1.87
 -11  -2   0    3.89    2.37
  11   2   0   -1.32    1.91
 -11   2   0    0.12    2.34
  12  -2   0   -0.27    2.15
 -12  -2   0   -2.20    2.36
  12   2   0    3.14    2.32
 -12   2   0    4.22    2.63
  13  -2   0    1.49    2.24
 -13  -2   0   -4.63    2.40
 -13   2   0   -1.27    2.56
  13   2   0   -0.11    2.34
  14  -2   0    5.28    2.77
 -14  -2   0    8.03    3.05
  14   2   0    3.54    2.70
 -14   2   0    7.42    3.15
 -15  -2   0    3.86    2.95
  15  -2   0    3.88    2.96
  15   2   0    1.71    2.84
 -15   2   0   -1.47    2.91
 -16  -2   0    2.91    3.07
  16  -2   0    8.48    3.27
 -16   2   0    2.36    3.39
  16   2   0   11.07    3.35
  17  -2   0   -4.10    2.93
 -17  -2   0    0.38    3.08
  17   2   0   -0.44    3.18
 -17   2   0   -1.90    3.21
  18  -2   0    9.78    3.66
 -18  -2   0    8.85    3.61
 -18   2   0    9.84    3.99
  18   2   0    5.67    3.72
  -1  -3   0   63.40    3.63
  -1   3   0   64.79    2.73
   2   3   0  223.56    9.72
  -2   3   0  251.72    9.78
  -2   3   0  246.56    9.77
   2   3   0  233.72    9.73
   3  -3   0   -0.05    0.95
  -3  -3   0    0.47    1.03
   3   3   0   -1.02    0.94
  -3   3   0    0.39    1.05
   3   3   0    2.27    1.06
  -3   3   0    0.05    1.11
  -4  -3   0    7.24    1.38
   4  -3   0    6.95    1.26
   4   3   0    9.73    1.41
  -4   3   0    5.27    1.42
   4   3   0    6.86    1.35
   5  -3   0   18.56    1.78
  -5  -3   0   15.50    1.84
  -5   3   0   17.12    1.89
   5   3   0   18.12    1.86
  -6  -3   0   88.81    4.55
   6  -3   0   90.84    4.53
   6   3   0   88.71    4.57
  -6   3   0   90.84    4.69
  -7  -3   0   -0.19    1.60
   7  -3   0    1.81    1.39
   7   3   0    1.15    1.57
  -7   3   0    0.94    1.70
  -8  -3   0   11.19    2.12
   8  -3   0   16.79    2.07
   8   3   0   14.42    2.14
  -8   3   0   13.41    2.22
  -9  -3   0    4.74    1.99
   9  -3   0    0.12    1.65
  -9   3   0    1.39    2.02
   9   3   0   -0.46    1.71
 -10  -3   0    4.07    2.22
  10  -3   0    3.02    1.84
  10   3   0    0.85    1.95
 -10   3   0   -2.47    2.06
 -11  -3   0   65.49    4.52
  11  -3   0   61.24    4.34
  11   3   0   77.48    4.80
 -11   3   0   62.15    4.84
  12  -3   0    3.36    2.18
 -12  -3   0    0.29    2.31
  12   3   0    4.07    2.29
 -12   3   0    0.62    2.48
 -13  -3   0    5.98    2.64
  13  -3   0    4.54    2.41
 -13   3   0   -0.23    2.70
  13   3   0    4.81    2.60
  14  -3   0    0.28    2.47
 -14  -3   0    0.89    2.67
 -14   3   0   -1.55    2.79
  14   3   0   -0.35    2.44
 -15  -3   0    0.87    2.82
  15  -3   0    4.20    2.85
  15   3   0    1.18    2.88
 -15   3   0    7.86    3.33
  16  -3   0   -0.12    2.84
 -16  -3   0   -1.68    2.82
 -16   3   0   -0.12    3.21
  16   3   0    0.04    2.93
 -17  -3   0   -0.67    2.89
  17  -3   0   -4.84    2.90
 -17   3   0   -2.57    3.41
  17   3   0    8.73    3.60
  18  -3   0   -3.23    3.19
 -18   3   0   -0.19    3.55
  18   3   0    0.35    3.38
   0  -4   0  553.86   24.19
  -1  -4   0  275.69   12.43
   2  -4   0    0.45    0.53
  -2  -4   0   -0.09    1.85
   2   4   0    0.41    0.75
  -2   4   0   -0.52    0.82
  -2   4   0   -0.04    0.87
   2   4   0    0.62    0.76
   3  -4   0   74.26    3.39
  -3   4   0   71.49    3.50
   3   4   0   67.91    3.43
  -3   4   0   78.61    3.55
   3   4   0   71.78    3.48
  -4  -4   0   39.26    2.41
   4  -4   0   37.98    2.39
   4   4   0   37.45    2.48
   4   4   0   36.91    2.54
  -4   4   0   39.00    2.60
  -4   4   0   41.44    2.57
   5  -4   0   43.34    2.68
  -5  -4   0   46.28    2.76
  -5   4   0   42.93    2.90
   5   4   0   42.22    2.81
   6  -4   0   -0.61    1.18
  -6  -4   0    0.18    1.41
   6   4   0    0.84    1.38
  -6   4   0    1.63    1.51
   7  -4   0   26.56    2.25
  -7  -4   0   23.66    2.32
   7   4   0   26.62    2.49
  -7   4   0   26.02    2.56
   8  -4   0  113.85    5.45
  -8  -4   0  107.73    5.53
  -8   4   0  107.86    5.73
   8   4   0  107.10    5.67
   9  -4   0    4.60    1.74
  -9  -4   0    0.61    1.83
  -9   4   0    0.77    1.94
   9   4   0    1.08    1.85
 -10  -4   0    6.17    2.19
  10  -4   0    5.25    1.94
  10   4   0    4.20    2.06
 -10   4   0    2.40    2.20
 -11  -4   0    2.29    2.27
  11  -4   0   -0.39    1.95
 -11   4   0    1.06    2.37
  11   4   0    1.16    2.12
 -12  -4   0   25.96    3.19
  12  -4   0   21.47    3.00
 -12   4   0   24.86    3.45
  12   4   0   23.94    3.26
 -13  -4   0    2.60    2.37
  13  -4   0    3.36    2.26
  13   4   0    0.31    2.41
 -13   4   0    1.62    2.60
 -14  -4   0    7.69    2.61
  14  -4   0   -2.09    2.32
  14   4   0    2.98    2.78
 -14   4   0    0.17    2.77
  15  -4   0    1.63    2.77
 -15  -4   0   -5.73    2.32
 -15   4   0    0.91    3.16
  15   4   0    2.53    2.86
  16  -4   0    5.46    2.98
 -16   4   0    6.20    3.42
  16   4   0   -2.20    2.84
  17  -4   0   17.41    3.65
  17   4   0    9.09    3.57
 -17   4   0    3.83    3.51
 -18   4   0   11.19    3.88
  18   4   0   -1.02    3.48
   0  -5   0   -0.51    2.03
  -1  -5   0   14.20    2.30
  -2  -5   0   15.11    2.37
  -2   5   0   15.18    1.19
  -2   5   0   15.12    1.19
   2   5   0   12.58    1.07
   3  -5   0    0.28    0.35
  -3   5   0    0.65    1.07
   3   5   0    1.01    1.00
  -3   5   0    1.43    1.07
   3   5   0    1.98    1.00
  -4  -5   0   -0.17    0.29
   4  -5   0   -0.61    0.95
  -4   5   0    0.23    1.20
  -4   5   0   -0.06    1.24
   4   5   0   -0.27    1.15
   4   5   0   -0.09    1.09
  -5  -5   0   77.69    3.82
   5  -5   0   75.92    3.80
   5   5   0   73.50    3.94
   5   5   0   74.82    3.97
  -5   5   0   81.84    4.04
  -6  -5   0    9.04    1.60
   6  -5   0    9.60    1.48
   6   5   0    9.69    1.70
  -6   5   0    9.39    1.80
   7  -5   0   13.44    1.75
  -7  -5   0   13.93    1.88
  -7   5   0   12.66    2.10
   7   5   0   12.75    1.99
   8  -5   0    3.60    1.59
  -8  -5   0    6.16    1.77
  -8   5   0    3.03    1.93
   8   5   0    3.69    1.87
  -9  -5   0    4.56    1.95
   9  -5   0    6.84    1.80
   9   5   0    5.21    2.02
  -9   5   0    5.97    2.21
  10  -5   0   23.40    2.62
 -10  -5   0   23.46    2.76
  10   5   0   24.13    2.88
 -10   5   0   19.41    2.94
  11  -5   0    5.52    2.09
 -11  -5   0    6.98    2.38
 -11   5   0   10.39    2.70
  11   5   0    9.29    2.43
  12  -5   0   13.85    2.49
 -12  -5   0   12.56    2.51
 -12   5   0    6.56    2.76
  12   5   0    6.83    2.61
 -13  -5   0    2.37    2.12
  13  -5   0   -1.97    2.02
  13   5   0   -2.90    2.27
 -13   5   0   -4.79    2.45
 -14  -5   0   -0.70    2.03
  14  -5   0    2.37    2.31
 -14   5   0   -0.42    2.74
  14   5   0    0.97    2.67
  15  -5   0   -0.03    2.44
  15   5   0    2.88    3.07
 -15   5   0    3.49    3.27
  16  -5   0    6.74    2.92
  16   5   0    5.24    3.30
 -16   5   0    2.23    3.32
  17   5   0    2.83    3.38
 -17   5   0    0.09    3.43
  18   5   0   -4.00    3.47
   0  -6   0   48.86    3.81
  -1  -6   0   10.90    2.40
  -2  -6   0   66.90    4.32
  -2   6   0   56.98    2.79
  -2   6   0   60.71    2.82
  -3   6   0  145.30    5.89
  -3   6   0  135.08    5.86
   3   6   0  127.36    5.77
   3   6   0  131.87    5.79
  -4   6   0   23.74    1.93
   4   6   0   21.88    1.83
  -4   6   0   24.17    2.12
   4   6   0   20.85    1.79
   5  -6   0    9.44    1.32
   5   6   0    8.78    1.55
  -5   6   0   11.80    1.70
   5   6   0   10.78    1.58
   6  -6   0    4.75    1.26
  -6  -6   0    2.82    1.31
   6   6   0    4.50    1.56
  -6   6   0    1.38    1.59
   7  -6   0   -1.09    1.25
  -7  -6   0    0.57    1.40
  -7   6   0    2.51    1.68
   7   6   0    1.76    1.67
   8  -6   0   19.46    2.10
  -8  -6   0   16.92    2.15
  -8   6   0   17.37    2.43
   8   6   0   20.16    2.53
  -9  -6   0   14.78    2.26
   9  -6   0   10.03    1.97
  -9   6   0   17.71    2.65
   9   6   0   11.80    2.35
  10  -6   0   23.15    2.58
 -10  -6   0   25.55    2.76
 -10   6   0   19.66    3.01
  10   6   0   22.45    2.90
 -11  -6   0   17.62    2.59
  11  -6   0   18.12    2.54
 -11   6   0   23.61    3.15
  11   6   0   17.42    2.92
  12  -6   0    9.76    2.28
 -12  -6   0   15.18    2.54
  12   6   0   12.66    2.89
 -12   6   0    6.23    2.77
  13  -6   0   30.75    3.21
 -13   6   0   21.51    3.63
  13   6   0   29.86    3.79
  14  -6   0    9.82    2.50
 -14   6   0   10.02    3.22
  14   6   0   12.47    3.28
 -15   6   0    3.75    3.14
  15   6   0    1.53    3.04
 -16   6   0    7.02    3.47
  16   6   0    4.92    3.27
 -17   6   0   12.23    3.96
  17   6   0   22.64    4.31
   0  -7   0    0.37    2.19
  -1  -7   0   26.94    3.08
  -2  -7   0   80.67    5.00
  -2   7   0   77.91    3.37
  -2   7   0   70.63    3.34
  -3  -7   0   56.33    4.20
   3   7   0   51.03    2.68
  -3   7   0   51.85    2.78
   3   7   0   45.61    2.67
  -3   7   0   59.01    2.83
   4   7   0   23.76    2.05
  -4   7   0   24.72    2.02
  -4   7   0   27.68    2.21
   4   7   0   24.75    1.92
   5  -7   0   -0.16    0.30
   5   7   0   -0.63    1.26
  -5   7   0   -0.56    1.30
  -5   7   0   -0.37    1.39
   5   7   0   -2.26    1.28
   6  -7   0    1.35    1.14
  -6  -7   0    1.06    0.48
   6   7   0   -0.51    1.45
  -6   7   0   -0.19    1.53
   7  -7   0   35.86    2.53
  -7  -7   0   34.80    2.45
   7   7   0   34.29    3.06
  -7   7   0   33.81    2.89
  -8  -7   0    4.17    1.57
   8  -7   0    3.21    1.49
  -8   7   0    4.17    1.96
   8   7   0    3.02    1.94
   9  -7   0    2.83    1.57
  -9  -7   0    3.68    1.69
   9   7   0    4.94    2.15
  -9   7   0    1.52    2.13
  10  -7   0   31.15    2.80
 -10  -7   0   34.65    2.95
  10   7   0   27.23    3.29
 -10   7   0   31.21    3.47
  11  -7   0    2.98    1.67
 -11   7   0    0.35    2.37
  11   7   0   -1.58    2.20
  12  -7   0    9.99    2.16
 -12   7   0    5.60    2.77
  12   7   0    4.58    2.58
  13   7   0    2.56    2.61
 -13   7   0    4.57    2.84
  14   7   0    2.31    2.90
 -14   7   0   -1.33    2.82
  15   7   0   -0.93    2.90
 -15   7   0    2.30    3.18
 -16   7   0    1.38    3.34
  16   7   0    4.26    3.30
  17   7   0    0.51    3.39
 -17   7   0   -3.03    3.30
   0  -8   0   -0.96    2.37
  -1  -8   0   -1.35    2.43
  -2  -8   0    3.95    2.57
  -3  -8   0    6.32    2.51
  -3   8   0    4.48    1.17
   3   8   0    1.28    1.01
   3   8   0    3.38    1.04
  -3   8   0    4.06    1.14
  -4   8   0   20.64    1.83
   4   8   0   17.19    1.76
   4   8   0   20.42    1.73
  -4   8   0   20.54    1.88
   5   8   0   14.94    1.73
  -5   8   0   12.20    1.82
   5   8   0   15.49    1.82
  -5   8   0   14.83    1.83
   6   8   0   14.78    2.00
  -6   8   0   13.91    2.01
   6   8   0   16.96    1.96
   7  -8   0    1.22    1.23
  -7  -8   0    0.92    1.02
   7   8   0    3.99    1.89
  -7   8   0    1.96    1.80
   8  -8   0    1.63    1.28
  -8  -8   0   -0.60    0.86
   8   8   0    2.74    1.99
  -8   8   0    1.27    1.95
   9  -8   0    2.51    1.40
   9   8   0   -2.72    1.91
  -9   8   0    0.64    2.13
  10   8   0    7.64    2.43
 -10   8   0   11.99    2.69
  11   8   0    2.29    2.36
 -11   8   0    5.72    2.52
 -12   8   0    1.24    2.64
  12   8   0    4.85    2.56
  13   8   0   -0.06    2.67
 -13   8   0    0.67    2.71
 -14   8   0   -3.04    2.68
  14   8   0    1.20    2.84
 -15   8   0   -4.87    2.89
  15   8   0    2.95    3.06
  16   8   0   22.65    4.28
 -16   8   0   12.86    3.84
   0  -9   0    1.52    2.56
  -1  -9   0    0.24    2.61
   1  -9   0   -0.39    2.60
  -2  -9   0    3.82    2.84
  -3  -9   0   15.54    3.05
  -3   9   0   13.98    1.46
  -3   9   0   12.96    1.40
  -4   9   0    1.33    1.34
   4   9   0    1.50    1.30
  -4   9   0   -0.07    1.25
   4   9   0    1.96    1.15
   5   9   0   33.04    2.53
  -5   9   0   31.13    2.62
   5   9   0   26.82    2.42
  -5   9   0   31.03    2.66
   6   9   0   38.05    3.15
  -6   9   0   46.66    3.19
   6   9   0   39.86    2.98
   7   9   0    0.91    1.87
  -7   9   0    2.51    1.91
  -8   9   0   14.62    2.47
   8   9   0   12.88    2.46
  -9   9   0    0.04    2.18
   9   9   0    2.29    2.12
 -10   9   0    0.47    2.30
  10   9   0    0.65    2.16
 -11   9   0   -0.37    2.47
  11   9   0   -1.19    2.31
  12   9   0    5.73    2.77
 -12   9   0   -2.77    2.48
 -13   9   0    1.53    2.90
  13   9   0    9.11    3.14
  14   9   0   10.93    3.37
 -14   9   0    9.49    3.29
  15   9   0   -1.22    3.02
 -15   9   0   -1.59    3.02
  16   9   0   -1.37    3.25
 -16   9   0   -1.59    3.13
   0 -10   0   24.59    3.68
   1 -10   0   31.50    3.90
  -1 -10   0   36.74    3.99
  -2 -10   0   37.28    4.14
  -3 -10   0    6.13    2.94
  -3  10   0    7.49    1.27
  -3  10   0    8.29    1.27
   4  10   0   -1.71    1.16
   4  10   0    1.68    1.33
  -4  10   0    1.35    1.34
  -4  10   0   -0.15    1.34
   5  10   0    0.64    1.55
   5  10   0    0.89    1.34
  -5  10   0    0.93    1.61
  -6  10   0    6.78    1.97
   6  10   0    8.79    2.03
   7  10   0    3.71    2.08
  -7  10   0    5.47    2.03
  -8  10   0   26.55    2.88
   8  10   0   18.48    2.73
  -9  10   0    3.37    2.28
   9  10   0    0.96    2.21
 -10  10   0    0.18    2.34
  10  10   0    1.48    2.30
  11  10   0    4.55    2.65
 -11  10   0    2.49    2.55
 -12  10   0    7.78    2.97
  12  10   0    2.16    2.75
 -13  10   0   18.21    3.58
  13  10   0   24.70    3.84
  14  10   0    3.01    3.17
 -14  10   0    0.23    3.08
  15  10   0    0.67    3.22
 -15  10   0    2.13    3.24
   0 -11   0    3.79    3.12
  -1 -11   0   -5.36    2.89
   1 -11   0    0.77    3.02
  -2 -11   0   28.41    4.17
   2 -11   0   35.62    4.36
  -3 -11   0   58.65    5.27
  -3  11   0   55.87    2.97
  -3  11   0   54.54    2.97
   4  11   0    5.14    1.56
  -4  11   0    3.64    1.53
   5  11   0   36.66    2.82
  -5  11   0   32.73    2.81
  -6  11   0    6.79    1.97
   6  11   0    7.61    2.04
  -7  11   0   30.27    2.89
   7  11   0   30.11    2.96
   8  11   0    4.14    2.19
  -8  11   0   -0.36    2.14
   9  11   0    8.24    2.49
  -9  11   0    8.17    2.55
  10  11   0    8.28    2.78
 -10  11   0    6.67    2.64
 -11  11   0    2.11    2.71
  11  11   0    5.78    2.77
  12  11   0    3.39    2.98
 -12  11   0    1.91    2.88
  13  11   0    4.11    3.14
 -13  11   0    2.21    3.00
  14  11   0    3.58    3.25
 -14  11   0    4.50    3.24
 -15  11   0    6.13    3.51
  15  11   0    6.17    3.49
   0 -12   0    1.25    3.36
   1 -12   0    5.58    3.47
  -1 -12   0   -0.11    3.28
   2 -12   0    2.22    3.47
  -2 -12   0    0.38    3.37
  -3 -12   0   10.35    3.48
  -4  12   0    7.41    1.63
   4  12   0    7.37    1.64
  -5  12   0   -0.91    1.62
   5  12   0   -0.88    1.68
   6  12   0    2.94    1.95
  -6  12   0    2.50    1.88
   7  12   0   -1.60    2.01
  -7  12   0   -1.57    2.00
  -8  12   0    0.38    2.23
   8  12   0   -0.70    2.24
   9  12   0   -3.91    2.35
  -9  12   0    1.30    2.38
  10  12   0    5.24    2.73
 -10  12   0    5.67    2.67
  11  12   0    8.75    3.17
 -11  12   0   12.32    3.03
 -12  12   0    2.24    2.93
  12  12   0    5.28    3.13
 -13  12   0    8.78    3.29
  13  12   0   12.37    3.56
 -14  12   0    1.21    3.14
  14  12   0   -0.23    3.15
   0 -13   0   -1.69    3.47
   1 -13   0   -0.97    3.59
  -1 -13   0    2.26    3.54
  -2 -13   0   -1.57    3.52
   2 -13   0    0.92    3.57
   3 -13   0   20.67    4.38
  -3 -13   0   16.64    3.96
  -3  13   0   13.23    1.52
  -4  13   0   -2.45    1.47
  -5  13   0    7.93    1.91
   5  13   0   11.53    2.00
   6  13   0    3.25    1.99
  -6  13   0    4.66    2.00
   7  13   0    3.15    2.21
  -7  13   0    2.77    2.18
  -8  13   0   -0.95    2.23
   8  13   0   -3.06    2.28
  -9  13   0   13.78    2.98
   9  13   0   19.95    3.17
 -10  13   0   -0.70    2.54
  10  13   0    4.33    2.80
  11  13   0   -1.97    2.89
 -11  13   0   -0.65    2.76
  12  13   0   -4.45    2.87
 -12  13   0   -0.06    2.90
 -13  13   0    1.38    3.07
  13  13   0    0.99    3.30
   0 -14   0    0.31    3.89
  -1 -14   0   16.36    4.49
   1 -14   0    8.93    4.13
  -2 -14   0   14.37    4.23
   2 -14   0   12.07    4.17
   3 -14   0    2.73    3.77
  -3 -14   0   -2.62    3.67
   4 -14   0    9.50    4.33
  -4  14   0    3.07    1.66
   5  14   0    0.88    1.76
  -5  14   0    0.42    1.82
  -6  14   0   -0.10    2.03
   6  14   0   -1.94    1.97
  -7  14   0    2.06    2.16
   7  14   0    0.88    2.26
  -8  14   0   32.78    3.49
   8  14   0   40.02    3.71
   9  14   0   11.12    2.94
  -9  14   0   10.80    2.71
 -10  14   0    9.94    2.93
  10  14   0    4.51    2.91
 -11  14   0    2.18    2.94
  11  14   0    4.93    3.10
  12  14   0    0.58    3.22
 -12  14   0    1.51    3.03
   0 -15   0    2.07    4.17
  -1 -15   0    5.55    4.34
   1 -15   0    2.24    4.40
  -2 -15   0    9.59    4.38
   2 -15   0   23.75    5.06
   3 -15   0   10.73    4.55
  -3 -15   0   14.40    4.20
   4 -15   0    5.59    4.44
   5 -15   0    8.05    4.74
  -5  15   0    5.77    2.05
   6  15   0    3.65    2.20
  -6  15   0    6.04    2.22
  -7  15   0   -0.03    2.27
   7  15   0    4.60    2.45
  -8  15   0   -2.16    2.43
   8  15   0    2.64    2.48
   9  15   0    4.01    2.73
  -9  15   0   -0.25    2.53
 -10  15   0    1.06    2.74
  10  15   0   -0.87    3.00
  11  15   0    5.11    3.17
 -11  15   0   -1.93    2.87
   0 -16   0   11.99    4.75
  -1 -16   0    0.44    4.53
   1 -16   0    3.48    4.47
  -2 -16   0    0.96    4.42
   2 -16   0    6.02    4.71
   3 -16   0    4.15    4.65
   4 -16   0    3.55    4.72
   5 -16   0    3.14    4.68
  -5  16   0    1.87    1.94
   6 -16   0   -4.25    4.55
  -6  16   0   -0.35    2.07
   6  16   0    1.31    2.17
  -7  16   0    8.78    2.44
   7  16   0    9.71    2.66
  -8  16   0    3.31    2.57
   8  16   0    7.69    2.83
  -9  16   0   -0.82    2.59
   9  16   0    1.73    2.99
   0 -17   0   -1.38    4.75
   1 -17   0    4.06    4.97
  -1 -17   0    2.13    4.82
   2 -17   0   -0.32    4.99
  -2 -17   0    2.76    4.66
   3 -17   0    3.15    4.95
   4 -17   0   -0.62    4.93
   5 -17   0    5.45    5.00
  -5  17   0   -1.27    1.82
   6 -17   0    7.28    5.09
  -6  17   0    5.01    2.17
   7 -17   0   -4.14    5.04
  -7  17   0    2.93    2.38
   8  17   0   -2.34    2.71
  -8  17   0    2.86    2.48
   0 -18   0    6.86    5.43
   1 -18   0   -4.48    5.20
  -1 -18   0   -0.20    5.11
   2 -18   0    7.10    5.33
  -2 -18   0   -3.58    4.94
   3 -18   0    9.76    5.42
   4 -18   0    5.64    5.41
   5 -18   0    0.05    5.26
 -19   0   1    1.49    3.33
  19   0  -1    0.95    3.56
  18   0  -1    0.20    3.35
 -18   0   1   -0.37    3.36
 -17   0   1    3.34    3.30
  17   0  -1   -6.95    2.81
 -16   0   1   -2.47    2.93
  16   0  -1   -1.34    2.83
 -15   0   1    1.94    2.97
  15   0  -1   -1.69    2.65
 -14   0   1   -2.81    2.66
  14   0  -1   -0.37    2.34
 -13   0   1    1.19    2.49
  13   0  -1    2.07    2.35
 -12   0   1   -0.81    2.47
  12   0  -1   -1.21    1.99
 -11   0   1    0.34    2.28
  11   0  -1    0.04    1.93
 -10   0   1   -0.38    2.03
  10   0  -1   -0.82    1.76
   9   0  -1   -0.96    1.57
  -9   0   1   -0.32    1.88
  -8   0   1   -0.98    1.70
   8   0  -1    0.23    1.55
  -7   0   1   -0.04    1.65
   7   0  -1    0.51    1.43
  -6   0   1   -2.07    1.50
   6   0  -1    3.20    1.40
  -5   0   1    1.34    1.44
   5   0  -1    1.04    1.27
   4   0  -1    0.07    1.12
  -4   0   1   -0.01    1.29
   3   0  -1   -1.07    0.76
  -3   0   1    0.46    0.93
  -2   0   1   -0.46    0.45
  -2   0   1   -0.37    0.40
   2   0  -1    0.14    0.45
   2   0  -1   -0.63    0.44
   1   0  -1   -0.08    0.15
   1   0  -1   -0.18    0.15
  -1   0   1    0.12    0.16
  -1   0   1    0.07    0.16
   0   0   1    0.00    0.11
   0   0  -1   -0.06    0.11
   0   0   1    0.00    0.12
   0   0  -1   -0.10    0.13
   1   0   1   -0.07    0.37
  -1   0  -1   -0.22    0.40
   1   0   1   -0.04    0.36
  -1   0  -1    0.01    0.36
  -2   0  -1    0.87    0.67
   2   0   1   -0.51    0.69
   2   0   1    0.76    0.74
  -2   0  -1    0.14    0.82
  -3   0  -1    1.86    1.20
   3   0   1    0.52    0.98
  -4   0  -1    1.13    1.38
   4   0   1   -1.11    1.20
   5   0   1   -0.98    1.32
  -5   0  -1    1.45    1.50
  -6   0  -1    2.53    1.69
   6   0   1    1.30    1.41
   7   0   1    0.29    1.56
  -7   0  -1    0.89    1.73
   8   0   1   -0.60    1.63
  -8   0  -1    0.35    1.82
   9   0   1   -1.51    1.71
  -9   0  -1    0.46    2.04
 -10   0  -1   -1.20    2.18
  10   0   1    0.09    1.90
  11   0   1   -3.13    1.98
 -11   0  -1   -0.20    2.42
  12   0   1   -0.84    2.23
 -12   0  -1    1.32    2.64
  13   0   1    1.86    2.38
 -13   0  -1   -1.89    2.58
  14   0   1   -0.88    2.63
 -14   0  -1    2.22    2.94
 -15   0  -1   -2.14    3.07
  15   0   1    0.73    2.83
  16   0   1    0.52    3.02
 -16   0  -1   -6.68    2.91
 -17   0  -1   -1.93    3.25
  17   0   1   -4.95    3.05
  18   0   1    2.59    3.36
 -18   0  -1    0.14    3.54
 -19  -1   1   -0.89    3.45
  19  -1  -1   -0.32    3.41
 -19   1   1   -3.42    3.46
  19   1  -1   -4.96    3.33
 -18  -1   1    4.48    3.39
  18  -1  -1    1.28    3.36
 -18   1   1   11.63    3.83
  18   1  -1    0.29    3.32
 -17  -1   1    0.76    3.15
  17  -1  -1    2.92    3.14
 -17   1   1    0.73    3.34
  17   1  -1   -0.12    3.11
  16  -1  -1   10.29    3.31
 -16  -1   1    6.73    3.28
 -16   1   1    4.57    3.25
  16   1  -1    7.27    3.31
 -15  -1   1    1.84    2.89
  15  -1  -1    2.17    2.72
 -15   1   1    2.55    3.08
  15   1  -1    0.96    2.69
  14  -1  -1    0.90    2.50
 -14  -1   1    1.10    2.62
  14   1  -1    3.54    2.52
 -14   1   1   -0.09    2.67
 -13  -1   1   11.05    2.87
  13  -1  -1    8.81    2.71
 -13   1   1   10.38    2.96
  13   1  -1   12.75    2.70
  12  -1  -1   74.07    5.00
 -12  -1   1   86.89    5.32
  12   1  -1   84.34    5.27
 -12   1   1   78.92    5.30
  11  -1  -1   -1.72    1.75
 -11  -1   1   -0.26    2.20
 -11   1   1   -4.07    2.16
  11   1  -1   -2.55    1.87
  10  -1  -1   40.35    3.37
 -10  -1   1   38.00    3.45
 -10   1   1   41.36    3.57
  10   1  -1   40.22    3.45
   9  -1  -1    0.64    1.60
  -9  -1   1   -1.18    1.85
  -9   1   1    1.84    1.95
   9   1  -1    0.83    1.66
   8  -1  -1   16.83    2.13
  -8  -1   1   13.81    2.25
   8   1  -1   19.26    2.23
  -8   1   1   18.44    2.40
  -7  -1   1  115.37    5.57
   7  -1  -1  111.43    5.46
  -7   1   1  113.09    5.61
   7   1  -1  105.78    5.40
  -6  -1   1   67.55    3.74
   6  -1  -1   64.94    3.55
   6   1  -1   60.29    3.54
  -6   1   1   61.41    3.75
  -5  -1   1  202.92    8.41
   5  -1  -1  184.49    8.31
  -5   1   1  203.17    8.44
   5   1  -1  183.02    8.32
  -4  -1   1    5.25    1.36
   4  -1  -1    3.82    1.19
   4   1  -1    4.15    1.19
  -4   1   1    6.03    1.38
  -3  -1   1  895.77   35.65
   3  -1  -1  903.30   35.66
  -3   1   1  927.17   35.68
  -3   1   1  899.42   35.65
   3   1  -1  900.72   35.66
   3   1  -1  814.53   35.63
   2  -1  -1    0.35    0.53
  -2  -1   1    0.26    0.47
  -2  -1   1   -0.19    0.57
   2  -1  -1    0.24    0.53
   2   1  -1    0.09    0.44
  -2   1   1    0.33    0.45
  -2   1   1    0.06    0.51
   2   1  -1   -0.37    0.42
  -1  -1   1   -0.03    0.27
  -1  -1   1    0.09    0.39
  -1  -1   1   -0.20    0.27
   1  -1  -1   -0.03    0.28
   1  -1  -1   -0.42    0.27
   1   1  -1    0.14    0.32
   1   1  -1    0.10    0.20
  -1   1   1   -0.39    0.20
   1   1  -1   -0.40    0.21
  -1   1   1   -0.28    0.21
   0  -1   1   -0.60    0.24
   0  -1  -1   -0.54    0.23
   0  -1   1   -0.86    0.26
   0  -1  -1   -0.19    0.24
   0   1   1   -0.53    0.18
   0   1   1   -0.63    0.18
   0   1  -1   -0.91    0.20
   0   1   1   -0.07    0.50
   1  -1   1   -0.25    0.47
   1  -1   1   -0.70    0.44
  -1  -1  -1   -0.80    0.49
   1   1   1    0.24    0.40
   1   1   1   -0.50    0.39
  -1   1  -1   -0.11    0.43
  -1   1  -1   -0.41    0.38
  -2  -1  -1  106.17    4.42
   2  -1   1  103.16    4.38
  -2   1  -1  104.82    4.38
  -2   1  -1  103.26    4.41
   2   1   1   95.49    4.35
   2   1   1   90.14    4.36
  -3  -1  -1   18.42    1.71
   3  -1   1   21.29    1.67
  -3   1  -1   19.78    1.68
   3   1   1   19.57    1.64
  -4  -1  -1   42.04    2.87
   4  -1   1   43.81    2.67
   4   1   1   38.63    2.66
  -4   1  -1   46.78    2.83
   5  -1   1   30.79    2.35
  -5  -1  -1   28.84    2.40
   5   1   1   30.64    2.39
  -5   1  -1   29.68    2.42
  -6  -1  -1    9.89    1.93
   6  -1   1    7.48    1.68
   6   1   1    7.36    1.67
  -6   1  -1    6.99    1.77
  -7  -1  -1   31.96    2.92
   7  -1   1   32.28    2.85
   7   1   1   34.90    2.86
  -7   1  -1   37.73    3.03
  -8  -1  -1   27.52    2.87
   8  -1   1   31.94    2.91
   8   1   1   35.17    2.95
  -8   1  -1   25.92    2.83
   9  -1   1    5.62    1.96
  -9  -1  -1    7.48    2.29
  -9   1  -1    5.01    2.24
   9   1   1    5.54    2.07
  10  -1   1   19.12    2.62
 -10  -1  -1   17.79    2.83
 -10   1  -1   17.35    2.85
  10   1   1   18.65    2.72
 -11  -1  -1    2.06    2.53
  11  -1   1    6.89    2.40
 -11   1  -1    5.77    2.55
  11   1   1   11.19    2.51
  12  -1   1   -0.17    2.21
 -12  -1  -1   -4.72    2.23
  12   1   1    0.08    2.17
 -12   1  -1   -0.68    2.51
  13  -1   1   17.59    3.16
 -13  -1  -1   19.56    3.46
 -13   1  -1   17.16    3.33
  13   1   1   18.08    3.21
  14  -1   1    4.19    2.77
 -14  -1  -1    5.57    3.06
  14   1   1    1.36    2.66
 -14   1  -1    0.62    3.00
  15  -1   1    3.51    2.93
 -15  -1  -1    4.53    3.10
  15   1   1    0.96    2.92
 -15   1  -1    2.06    3.21
 -16  -1  -1   -2.42    3.03
  16  -1   1    0.76    3.01
 -16   1  -1    1.37    3.38
  16   1   1   -0.08    2.92
 -17  -1  -1    0.17    3.19
  17  -1   1   12.88    3.81
  17   1   1   11.25    3.63
 -17   1  -1    3.84    3.58
  18  -1   1    1.58    3.47
 -18  -1  -1    0.19    3.36
 -18   1  -1   -5.42    3.30
  18   1   1    4.78    3.82
  19  -2  -1    2.20    3.53
  19   2  -1   10.70    4.17
  18  -2  -1   -7.57    2.90
 -18  -2   1   -1.41    3.17
 -18   2   1    0.35    3.51
  18   2  -1    1.83    3.47
 -17  -2   1    2.53    3.09
  17  -2  -1    7.12    3.30
 -17   2   1    2.88    3.36
  17   2  -1    2.44    3.14
  16  -2  -1   28.30    4.08
 -16  -2   1   23.52    3.78
  16   2  -1   19.50    3.83
 -16   2   1   20.59    4.01
  15  -2  -1    5.93    2.80
 -15  -2   1    1.70    2.96
 -15   2   1    3.80    3.13
  15   2  -1    8.26    2.95
 -14  -2   1    3.14    2.76
  14  -2  -1    4.35    2.58
 -14   2   1    2.55    2.80
  14   2  -1    5.42    2.70
  13  -2  -1   -1.36    2.26
 -13  -2   1    0.69    2.52
  13   2  -1   -1.26    2.32
 -13   2   1    0.24    2.52
  12  -2  -1   26.52    3.18
 -12  -2   1   22.24    3.19
  12   2  -1   25.11    3.25
 -12   2   1   22.12    3.29
 -11  -2   1   16.15    2.81
  11  -2  -1   23.33    2.78
 -11   2   1   25.78    3.18
  11   2  -1   17.65    2.79
  10  -2  -1   35.41    3.11
 -10  -2   1   27.97    3.12
  10   2  -1   34.92    3.15
 -10   2   1   25.82    3.12
  -9  -2   1    2.70    1.90
   9  -2  -1    2.23    1.66
  -9   2   1    1.64    1.93
   9   2  -1    2.65    1.75
   8  -2  -1    2.20    1.52
  -8  -2   1    2.63    1.82
  -8   2   1    3.90    1.90
   8   2  -1    1.34    1.59
   7  -2  -1   27.36    2.31
  -7  -2   1   19.47    2.29
   7   2  -1   22.78    2.30
  -7   2   1   23.35    2.44
  -6  -2   1   -1.10    1.46
   6  -2  -1   -0.25    1.27
  -6   2   1    1.39    1.54
   6   2  -1   -1.15    1.30
   5  -2  -1   22.87    1.89
  -5  -2   1   19.23    1.91
  -5   2   1   21.44    2.04
   5   2  -1   18.61    1.87
   4  -2  -1  359.03   14.28
  -4  -2   1  335.41   14.26
   4   2  -1  330.49   14.27
  -4   2   1  361.14   14.34
   4   2  -1  352.04   14.31
   3  -2  -1   37.59    2.21
  -3  -2   1   34.13    2.20
   3   2  -1   34.30    2.13
   3   2  -1   34.77    2.18
  -3   2   1   40.42    2.21
  -3   2   1   38.74    2.25
  -2  -2   1  505.86   21.94
   2  -2  -1  553.83   21.97
   2  -2  -1  581.54   21.98
  -2  -2   1  552.55   21.96
   0  -2   1   -0.47    0.10
   0  -2  -1    0.18    0.86
   0   2   1   -0.19    0.27
   0   2   1    0.17    0.28
   0   2  -1   -1.13    0.30
   0   2  -1   -0.29    0.33
   1  -2   1  319.85   12.42
   1  -2   1  337.67   12.45
  -1  -2  -1  267.75   12.37
   2  -2   1  977.96   38.21
  -2  -2  -1  956.79   38.20
  -2   2  -1  979.22   38.22
  -2   2  -1 1000.00   38.24
   2   2   1  927.64   38.19
   2   2   1  888.95   38.18
  -3  -2  -1  134.99    5.79
   3  -2   1  128.00    5.71
   3   2   1  133.74    5.80
  -3   2  -1  130.32    5.78
   3   2   1  124.92    5.73
  -4  -2  -1    4.90    1.48
   4  -2   1    4.73    1.33
  -4   2  -1    3.91    1.48
   4   2   1    2.35    1.27
   5  -2   1  130.39    5.93
  -5  -2  -1  130.09    6.02
   5   2   1  121.16    5.90
  -5   2  -1  135.21    6.06
   6  -2   1   21.38    2.16
  -6  -2  -1   17.86    2.18
  -6   2  -1   19.52    2.19
   6   2   1   21.22    2.17
  -7  -2  -1    8.20    1.94
   7  -2   1    8.02    1.72
   7   2   1    6.82    1.82
  -7   2  -1    9.73    1.99
  -8  -2  -1    0.62    1.83
   8  -2   1    2.76    1.68
  -8   2  -1    0.91    1.80
   8   2   1    3.59    1.71
  -9  -2  -1    3.71    2.06
   9  -2   1    1.02    1.73
  -9   2  -1    1.52    1.98
   9   2   1    1.81    1.91
  10  -2   1    5.82    2.04
 -10  -2  -1    5.97    2.33
 -10   2  -1    5.26    2.47
  10   2   1    6.92    2.32
 -11  -2  -1    2.08    2.26
  11  -2   1   -1.91    2.03
 -11   2  -1    1.78    2.40
  11   2   1    0.41    2.07
 -12  -2  -1   13.55    3.02
  12  -2   1   13.74    2.83
  12   2   1   14.04    2.84
 -12   2  -1    9.97    2.97
 -13  -2  -1    6.33    2.87
  13  -2   1    7.15    2.71
 -13   2  -1    1.06    2.86
  13   2   1    8.59    2.78
 -14  -2  -1    0.82    2.81
  14  -2   1   -0.06    2.46
  14   2   1   -0.87    2.60
 -14   2  -1    2.91    3.06
 -15  -2  -1   12.78    3.50
  15  -2   1   13.01    3.38
  15   2   1   11.04    3.41
 -15   2  -1   14.38    3.72
 -16  -2  -1    2.27    3.34
  16  -2   1    4.68    3.04
 -16   2  -1    5.01    3.47
  16   2   1    8.13    3.43
 -17  -2  -1    2.68    3.12
  17  -2   1   -1.17    3.14
  17   2   1    1.83    3.32
 -17   2  -1   -2.91    3.30
  18  -2   1   -0.84    3.38
  18   2   1    4.72    3.67
 -18   2  -1   -2.33    3.57
  18  -3  -1    3.32    3.24
 -18   3   1   -2.50    3.32
  18   3  -1   -4.86    3.17
 -17  -3   1   -2.54    2.87
  17  -3  -1    1.24    2.97
  17   3  -1    1.97    3.10
 -17   3   1   -3.37    3.23
  16  -3  -1   -1.16    2.78
 -16  -3   1    1.08    3.02
  16   3  -1    5.11    3.10
 -16   3   1    2.64    3.27
  15  -3  -1   10.96    3.23
 -15  -3   1    5.69    2.95
 -15   3   1   15.30    3.50
  15   3  -1    8.02    2.96
 -14  -3   1   -1.29    2.47
  14  -3  -1   -1.43    2.37
 -14   3   1    0.35    2.64
  14   3  -1    2.60    2.53
 -13  -3   1    7.16    2.62
  13  -3  -1    8.38    2.61
 -13   3   1    1.97    2.63
  13   3  -1    3.91    2.44
  12  -3  -1   12.22    2.50
 -12  -3   1    7.65    2.56
  12   3  -1    8.17    2.53
 -12   3   1   14.04    2.87
  11  -3  -1   31.71    3.19
 -11  -3   1   29.03    3.20
 -11   3   1   28.41    3.38
  11   3  -1   28.63    3.24
 -10  -3   1    4.75    2.04
  10  -3  -1    6.09    1.94
  10   3  -1    2.02    1.90
 -10   3   1    3.29    2.21
  -9  -3   1   16.81    2.32
   9  -3  -1   16.11    2.20
   9   3  -1   17.99    2.36
  -9   3   1   16.26    2.45
   8  -3  -1    9.56    1.80
  -8  -3   1    6.54    1.81
   8   3  -1    6.03    1.76
  -8   3   1    5.01    1.92
  -7  -3   1   21.68    2.27
   7  -3  -1   24.62    2.23
  -7   3   1   21.59    2.38
   7   3  -1   22.05    2.23
   6  -3  -1   31.61    2.41
  -6  -3   1   27.92    2.45
   6   3  -1   27.35    2.46
  -6   3   1   30.65    2.69
   5  -3  -1   46.74    2.83
  -5  -3   1   46.42    2.86
  -5   3   1   45.63    2.99
   5   3  -1   43.69    2.87
  -4  -3   1  183.27    7.92
   4  -3  -1  186.80    7.93
   4   3  -1  185.30    7.95
  -4   3   1  191.72    7.98
   4   3  -1  178.59    7.95
  -4   3   1  193.88    8.02
  -3  -3   1  186.40    7.64
   3  -3  -1  193.79    7.67
   3   3  -1  165.16    7.65
  -3   3   1  192.60    7.71
   3   3  -1  176.32    7.68
  -3   3   1  187.60    7.73
  -2  -3   1   30.67    2.56
  -2   3   1   23.33    1.60
  -2   3   1   24.95    1.55
   2   3  -1   23.54    1.48
   2   3  -1   19.36    1.48
  -1  -3   1  447.00   19.47
   0  -3  -1  155.09    7.60
   0   3  -1  172.54    6.67
  -1   3  -1  247.99    9.38
   1   3   1  227.16    9.33
   1   3   1  209.13    9.31
  -1   3  -1  237.16    9.37
  -2  -3  -1    0.98    0.83
   2  -3   1   -0.16    0.87
  -2   3  -1   -0.22    0.99
   2   3   1    0.39    0.90
  -2   3  -1    1.73    0.91
   2   3   1    1.42    0.92
   3  -3   1   -0.34    1.02
  -3  -3  -1    2.35    1.18
  -3   3  -1   -0.24    1.03
   3   3   1    0.64    1.08
  -3   3  -1    0.19    1.20
   3   3   1   -1.35    1.04
  -4  -3  -1   36.95    2.64
   4  -3   1   39.45    2.49
   4   3   1   40.48    2.54
  -4   3  -1   39.75    2.70
  -5  -3  -1   64.18    3.66
   5  -3   1   67.42    3.57
   5   3   1   62.56    3.55
  -5   3  -1   69.97    3.75
   6  -3   1   -0.73    1.29
  -6  -3  -1    2.51    1.62
   6   3   1    1.65    1.47
  -6   3  -1   -0.85    1.52
  -7  -3  -1    2.25    1.72
   7  -3   1    2.40    1.52
  -7   3  -1    2.82    1.71
   7   3   1    1.65    1.57
   8  -3   1    8.93    1.84
  -8  -3  -1   13.67    2.24
  -8   3  -1    8.86    2.17
   8   3   1    9.36    1.99
   9  -3   1   15.01    2.24
  -9  -3  -1   15.78    2.50
  -9   3  -1    9.95    2.38
   9   3   1   15.34    2.41
  10  -3   1   11.52    2.29
 -10  -3  -1    7.84    2.42
 -10   3  -1    3.85    2.37
  10   3   1   10.98    2.45
 -11  -3  -1   67.63    4.74
  11  -3   1   70.54    4.61
 -11   3  -1   69.56    5.08
  11   3   1   71.40    4.94
 -12  -3  -1    0.08    2.48
  12  -3   1    3.38    2.28
 -12   3  -1    0.46    2.49
  12   3   1    2.40    2.42
  13  -3   1    8.20    2.68
 -13  -3  -1    8.22    2.88
  13   3   1    9.02    2.89
 -13   3  -1    9.41    3.04
 -14  -3  -1   16.53    3.33
  14  -3   1   24.05    3.53
 -14   3  -1   17.51    3.64
  14   3   1   14.49    3.32
 -15  -3  -1   21.94    3.99
  15  -3   1   28.74    3.89
  15   3   1   23.53    4.02
 -15   3  -1   19.47    4.07
  16  -3   1    7.20    3.15
 -16  -3  -1    3.29    3.12
 -16   3  -1   -1.20    3.41
  16   3   1   -0.51    3.09
  17  -3   1    2.72    3.31
  17   3   1    6.83    3.53
 -17   3  -1   10.82    3.93
  18   3   1    4.86    3.71
  18  -4  -1    2.00    3.13
  18   4  -1    0.81    3.47
 -18   4   1   -4.40    3.43
  17  -4  -1    7.64    3.20
 -17   4   1    6.77    3.63
  17   4  -1    7.77    3.66
  16  -4  -1   -0.47    2.74
 -16  -4   1    1.04    2.61
  16   4  -1    1.37    2.94
 -16   4   1   -5.14    2.95
  15  -4  -1    5.08    2.83
 -15  -4   1    2.24    2.47
  15   4  -1   -0.69    2.56
 -15   4   1    2.52    3.09
 -14  -4   1    1.61    2.28
  14  -4  -1    3.70    2.49
  14   4  -1    3.45    2.64
 -14   4   1    0.28    2.70
 -13  -4   1   24.14    3.29
  13  -4  -1   24.01    3.08
  13   4  -1   22.80    3.30
 -13   4   1   18.20    3.34
 -12  -4   1   16.31    2.85
  12  -4  -1   16.00    2.70
  12   4  -1   14.65    2.85
 -12   4   1   13.91    2.94
 -11  -4   1    2.57    2.17
  11  -4  -1    4.07    2.03
 -11   4   1    3.13    2.45
  11   4  -1    3.00    2.15
  10  -4  -1    8.54    2.04
 -10  -4   1    5.71    2.18
 -10   4   1    6.43    2.33
  10   4  -1    4.98    2.11
   9  -4  -1   41.23    3.10
  -9  -4   1   43.26    3.31
   9   4  -1   39.83    3.31
  -9   4   1   40.65    3.58
   8  -4  -1   34.12    2.80
  -8  -4   1   36.49    2.93
  -8   4   1   42.40    3.24
   8   4  -1   33.96    2.93
   7  -4  -1    0.81    1.38
  -7  -4   1    1.23    1.52
  -7   4   1   -3.87    1.51
   7   4  -1    1.40    1.51
  -6  -4   1    8.03    1.60
   6  -4  -1   10.76    1.56
   6   4  -1    8.10    1.63
  -6   4   1   11.83    1.87
   5  -4  -1   14.06    1.58
  -5  -4   1   11.68    1.58
  -5   4   1   15.25    1.79
   5   4  -1   11.59    1.64
   4  -4  -1   21.94    1.85
  -4  -4   1   22.93    1.89
  -4   4   1   24.60    1.81
   4   4  -1   22.25    1.77
   4   4  -1   20.42    1.79
  -4   4   1   21.77    1.84
   3  -4  -1    0.30    0.62
  -3  -4   1    0.02    0.34
   3   4  -1   -1.77    0.96
   3   4  -1   -0.11    0.90
  -3   4   1   -0.82    0.94
  -3   4   1    2.26    1.09
  -2  -4   1   41.21    3.22
  -2   4   1   35.98    1.94
   2   4  -1   36.23    1.88
  -2   4   1   36.25    1.96
   2   4  -1   33.02    1.90
  -1  -4   1    1.68    1.78
   0  -4  -1    2.44    1.83
  -1  -4  -1  161.99    7.83
  -1   4  -1  158.50    6.67
  -1   4  -1  164.19    6.67
  -2   4  -1  148.28    6.14
  -2   4  -1  150.76    6.13
   2   4   1  135.34    6.06
   2   4   1  142.08    6.08
  -3  -4  -1   77.56    3.72
   3  -4   1   83.00    3.79
  -3   4  -1   81.47    3.95
  -3   4  -1   84.63    3.91
   3   4   1   83.34    3.90
   3   4   1   77.79    3.84
  -4  -4  -1   73.38    3.65
   4  -4   1   74.85    3.56
   4   4   1   67.75    3.62
  -4   4  -1   71.11    3.76
   4   4   1   69.76    3.66
   5  -4   1   21.18    1.87
  -5  -4  -1   19.63    2.00
  -5   4  -1   21.04    2.11
   5   4   1   21.57    1.95
  -6  -4  -1   -0.34    1.50
   6  -4   1    0.48    1.29
   6   4   1   -0.78    1.40
  -6   4  -1    0.11    1.49
  -7  -4  -1   -0.62    1.60
   7  -4   1   -0.22    1.38
  -7   4  -1   -0.30    1.67
   7   4   1    4.74    1.65
   8  -4   1   14.02    2.01
  -8  -4  -1    9.76    2.12
   8   4   1   10.93    2.15
  -8   4  -1   11.38    2.23
   9  -4   1   27.40    2.77
  -9  -4  -1   27.62    2.91
   9   4   1   24.79    2.88
  -9   4  -1   27.30    3.00
 -10  -4  -1   -1.98    2.06
  10  -4   1   -0.94    1.76
 -10   4  -1    0.17    2.20
  10   4   1   -1.52    2.05
 -11  -4  -1   56.86    4.34
  11  -4   1   56.47    4.09
  11   4   1   60.30    4.57
 -11   4  -1   55.36    4.65
  12  -4   1    1.00    2.10
 -12  -4  -1    2.75    2.42
 -12   4  -1   -1.74    2.45
  12   4   1    1.42    2.38
 -13  -4  -1   -0.33    2.22
  13  -4   1    0.38    2.31
  13   4   1    0.55    2.47
 -13   4  -1    3.18    2.83
  14  -4   1    2.77    2.62
 -14  -4  -1    5.02    2.46
  14   4   1   -3.77    2.44
 -14   4  -1   -4.26    2.72
  15  -4   1    0.18    2.64
 -15  -4  -1   -1.84    2.48
  15   4   1   -0.85    2.86
 -15   4  -1   -1.63    2.96
  16  -4   1    6.38    3.19
 -16   4  -1   -1.33    3.35
  16   4   1    1.64    3.22
  17  -4   1   -1.64    3.06
 -17   4  -1    1.56    3.56
  17   4   1    1.18    3.43
 -18   5   1    0.73    3.76
  18   5  -1    7.04    3.82
  17   5  -1    5.03    3.54
 -17   5   1    9.64    3.57
  16  -5  -1    3.50    2.67
  16   5  -1   -0.43    2.87
 -16   5   1    3.33    3.28
  15  -5  -1    1.05    2.40
  15   5  -1    0.64    2.75
 -15   5   1   -2.93    2.97
  14  -5  -1   -6.09    1.95
 -14  -5   1   -4.87    1.92
  14   5  -1   -0.54    2.47
 -14   5   1   -2.06    2.68
  13  -5  -1    5.43    2.33
 -13  -5   1    3.33    2.19
  13   5  -1    2.28    2.56
 -13   5   1    4.87    2.70
 -12  -5   1   33.01    3.32
  12  -5  -1   30.55    3.18
  12   5  -1   26.47    3.40
 -12   5   1   31.19    3.60
 -11  -5   1    4.42    2.20
  11  -5  -1    3.34    2.04
  11   5  -1    4.73    2.33
 -11   5   1    3.72    2.43
  10  -5  -1  113.02    5.78
 -10  -5   1  114.36    5.89
 -10   5   1  111.23    6.20
  10   5  -1  110.57    6.08
  -9  -5   1   70.46    4.19
   9  -5  -1   68.16    4.10
   9   5  -1   69.29    4.43
  -9   5   1   79.86    4.61
   8  -5  -1    9.78    1.76
  -8  -5   1    6.12    1.77
   8   5  -1    6.77    1.89
  -8   5   1    8.82    2.07
  -7  -5   1   31.76    2.59
   7  -5  -1   32.04    2.50
  -7   5   1   33.88    2.92
   7   5  -1   30.38    2.72
  -6  -5   1    0.10    1.32
   6  -5  -1   -0.76    1.18
   6   5  -1    1.26    1.38
  -6   5   1    2.03    1.53
  -5  -5   1  235.49   10.08
   5  -5  -1  241.79   10.13
   5   5  -1  242.15   10.26
   5   5  -1  245.46   10.22
  -5   5   1  243.33   10.28
   4  -5  -1   13.51    1.23
  -4   5   1   14.02    1.59
  -4   5   1   14.65    1.51
   4   5  -1   14.23    1.52
   4   5  -1   12.44    1.45
  -3  -5   1   63.74    4.18
   3   5  -1   64.44    3.17
   3   5  -1   62.62    3.13
  -3   5   1   70.03    3.20
  -3   5   1   66.62    3.22
  -2  -5   1    4.90    2.07
  -2   5   1    4.59    0.80
  -2   5   1    6.24    0.86
  -1  -5   1    1.76    2.02
   0  -5  -1  103.31    5.61
  -1  -5  -1   61.63    4.27
  -1   5  -1   61.56    2.83
  -1   5  -1   62.88    2.82
   2   5   1   11.64    1.14
  -2   5  -1   13.11    1.27
  -2   5  -1   13.09    1.26
   2   5   1   13.21    1.18
   3  -5   1   73.65    3.41
  -3   5  -1   73.79    3.65
  -3   5  -1   78.60    3.67
   3   5   1   73.67    3.60
   3   5   1   73.77    3.58
  -4  -5  -1   74.93    3.53
   4  -5   1   72.06    3.56
   4   5   1   68.77    3.70
  -4   5  -1   79.09    3.85
   4   5   1   72.06    3.71
   5  -5   1   11.28    1.48
  -5  -5  -1   11.01    1.57
   5   5   1   13.59    1.69
  -5   5  -1   13.77    1.82
  -6  -5  -1    7.59    1.60
   6  -5   1    7.58    1.45
   6   5   1    6.03    1.68
  -6   5  -1    8.69    1.81
  -7  -5  -1   13.73    1.94
   7  -5   1   10.60    1.70
   7   5   1   10.88    2.01
  -7   5  -1    8.83    2.00
  -8  -5  -1    0.73    1.74
   8  -5   1    3.22    1.58
  -8   5  -1    3.75    1.93
   8   5   1    0.98    1.75
   9  -5   1    3.18    1.73
  -9  -5  -1    4.86    2.00
   9   5   1    3.42    2.12
  -9   5  -1    3.99    2.17
  10  -5   1   27.86    2.80
 -10  -5  -1   25.83    2.97
  10   5   1   23.40    3.14
 -10   5  -1   23.20    3.09
  11  -5   1   32.56    3.23
 -11  -5  -1   35.02    3.39
  11   5   1   34.24    3.69
 -11   5  -1   35.92    3.78
  12  -5   1    1.17    2.05
 -12  -5  -1    7.03    2.28
 -12   5  -1    1.48    2.58
  12   5   1    0.14    2.35
  13  -5   1   11.74    2.60
 -13  -5  -1    8.43    2.40
 -13   5  -1   10.87    3.26
  13   5   1   13.98    3.05
  14  -5   1    4.86    2.58
 -14   5  -1    5.02    3.16
  14   5   1    5.56    3.00
  15  -5   1    8.49    2.76
 -15   5  -1   -0.66    3.06
  15   5   1    5.12    3.20
  16   5   1    2.06    3.33
 -16   5  -1   -0.49    3.15
  17   5   1   -3.56    3.29
 -17   5  -1   -3.81    3.43
  18   6  -1    2.80    3.78
 -18   6   1   -0.20    3.44
  17   6  -1   -1.10    3.17
 -17   6   1   -3.73    3.26
  16   6  -1    6.77    3.28
 -16   6   1    4.26    3.34
 -15   6   1   11.61    3.44
  15   6  -1   13.60    3.33
  14  -6  -1    2.86    2.07
  14   6  -1   -3.04    2.41
 -14   6   1   -1.16    2.74
  13  -6  -1   16.01    2.54
 -13  -6   1   12.76    2.42
  13   6  -1   12.14    3.01
 -13   6   1   16.49    3.23
 -12  -6   1   -1.31    1.81
  12  -6  -1   -0.11    1.78
 -12   6   1    1.97    2.45
  12   6  -1    3.59    2.46
 -11  -6   1   22.32    2.74
  11  -6  -1   20.31    2.59
  11   6  -1   19.60    2.93
 -11   6   1   19.44    3.07
  10  -6  -1    1.12    1.67
 -10  -6   1   -2.33    1.72
  10   6  -1    0.20    1.90
 -10   6   1   -1.59    2.07
  -9  -6   1    0.09    1.71
   9  -6  -1    2.40    1.60
  -9   6   1    4.51    2.11
   9   6  -1    0.85    1.86
  -8  -6   1   51.48    3.39
   8  -6  -1   58.27    3.40
  -8   6   1   54.56    3.87
   8   6  -1   51.70    3.66
   7  -6  -1   74.91    3.92
  -7  -6   1   73.40    3.91
   7   6  -1   75.52    4.26
  -7   6   1   79.98    4.40
  -6  -6   1   30.09    2.16
   6  -6  -1   31.06    2.23
   6   6  -1   26.25    2.35
  -6   6   1   30.22    2.51
   5  -6  -1    1.39    0.98
  -5  -6   1    0.24    0.54
   5   6  -1    1.77    1.24
  -5   6   1    0.52    1.38
   5   6  -1    1.41    1.32
  -5   6   1    1.34    1.32
   4  -6  -1   23.85    1.62
   4   6  -1   27.06    2.02
  -4   6   1   31.06    2.22
  -4   6   1   31.28    2.15
   4   6  -1   29.20    2.14
  -3  -6   1   -0.41    2.11
   3   6  -1    1.02    0.89
  -3   6   1    1.07    0.93
   3   6  -1   -0.20    0.97
  -3   6   1    1.02    1.00
  -2  -6   1   42.60    3.53
  -2   6   1   38.32    1.96
  -1  -6   1    0.25    2.11
   1  -6  -1    3.47    2.21
   0  -6  -1   47.66    3.86
  -1  -6  -1   37.67    3.61
  -1   6  -1   36.16    1.86
  -2  -6  -1   20.02    2.59
   2   6   1   17.91    1.50
  -2   6  -1   21.35    1.61
  -2   6  -1   15.54    1.41
   2   6   1   15.78    1.30
   3  -6   1    4.52    0.77
   3   6   1    4.64    1.09
  -3   6  -1    6.10    1.24
  -3   6  -1    3.94    1.22
   3   6   1    4.23    1.15
   4  -6   1  210.45    8.64
  -4  -6  -1  186.90    8.51
   4   6   1  204.74    8.75
   4   6   1  210.32    8.80
  -4   6  -1  212.39    8.86
  -4   6  -1  213.60    8.83
  -5  -6  -1    1.14    0.96
   5  -6   1    1.40    1.08
   5   6   1    0.54    1.32
  -5   6  -1   -0.92    1.39
   5   6   1    1.23    1.44
  -6  -6  -1   -0.87    1.24
   6  -6   1    0.86    1.17
  -6   6  -1    1.16    1.61
   6   6   1   -0.02    1.46
  -7  -6  -1   33.04    2.64
   7  -6   1   27.23    2.37
   7   6   1   32.19    2.82
  -7   6  -1   33.84    2.89
  -8  -6  -1   16.66    2.21
   8  -6   1   16.64    2.07
  -8   6  -1   17.68    2.50
   8   6   1   19.61    2.48
  -9  -6  -1    8.70    2.08
   9  -6   1    9.80    1.94
  -9   6  -1    9.22    2.40
   9   6   1    6.72    2.27
  10  -6   1   33.77    3.00
 -10  -6  -1   27.11    2.86
 -10   6  -1   25.59    3.20
  10   6   1   29.06    3.41
  11  -6   1   -0.07    1.71
 -11  -6  -1    1.10    1.87
 -11   6  -1    1.96    2.47
  11   6   1    4.39    2.51
 -12  -6  -1    4.61    2.00
  12  -6   1    4.11    2.04
 -12   6  -1    1.15    2.65
  12   6   1    2.04    2.46
  13  -6   1    2.42    2.09
 -13   6  -1    1.99    2.74
  13   6   1    4.64    2.73
  14  -6   1    1.74    2.10
 -14   6  -1   -2.08    2.85
  14   6   1    1.55    2.84
  15   6   1    3.67    3.16
 -15   6  -1   -1.68    2.95
  16   6   1    6.75    3.56
 -16   6  -1    2.82    3.46
  17   6   1    3.56    3.50
 -17   6  -1    1.59    3.64
  17   7  -1   -0.85    3.30
 -17   7   1   -0.90    3.26
  16   7  -1   -0.15    3.05
 -16   7   1    2.96    3.42
 -15   7   1    0.20    3.04
  15   7  -1   -0.19    2.85
  14   7  -1    4.78    2.89
 -14   7   1    1.60    2.90
 -13   7   1   -0.71    2.50
  13   7  -1    3.58    2.70
  12  -7  -1    2.23    1.79
 -12   7   1    4.44    2.65
  12   7  -1    3.71    2.48
  11  -7  -1   -1.13    1.56
 -11   7   1    0.51    2.28
  11   7  -1    0.38    2.19
 -10  -7   1    5.81    1.85
  10  -7  -1    3.70    1.68
  10   7  -1    4.38    2.21
 -10   7   1    7.84    2.54
   9  -7  -1   -0.23    1.50
  -9  -7   1   -0.89    1.44
   9   7  -1    0.75    1.83
  -9   7   1   -2.86    1.92
  -8  -7   1    2.18    1.50
   8  -7  -1    0.64    1.38
   8   7  -1   -0.05    1.69
  -8   7   1    2.91    1.96
   7  -7  -1    0.22    1.19
  -7  -7   1    0.71    1.05
  -7   7   1    2.76    1.75
   7   7  -1    0.23    1.54
  -6  -7   1    6.63    1.10
   6  -7  -1    8.03    1.26
   6   7  -1    7.70    1.66
   6   7  -1    8.23    1.71
  -6   7   1   11.75    1.81
   5  -7  -1    3.11    0.73
  -5   7   1    6.16    1.49
   5   7  -1    4.82    1.40
  -5   7   1    5.95    1.43
   5   7  -1    2.60    1.35
  -4   7   1    3.66    1.26
   4   7  -1    3.77    1.24
  -4   7   1    0.42    1.14
   4   7  -1    2.08    1.09
  -3  -7   1    9.70    2.54
  -3   7   1    8.51    1.14
   3   7  -1    9.42    1.10
   3   7  -1    8.72    1.18
  -3   7   1    9.69    1.21
  -2  -7   1    8.07    2.41
   1  -7  -1   -1.12    2.29
  -1  -7   1   -0.54    2.26
   0  -7  -1   -1.04    2.28
  -1  -7  -1    9.87    2.57
  -2  -7  -1   26.64    3.07
  -2   7  -1   26.69    1.77
   2   7   1   22.44    1.61
  -2   7  -1   25.38    1.76
   3   7   1   20.66    1.65
  -3   7  -1   19.44    1.70
  -3   7  -1   20.83    1.73
   3   7   1   19.96    1.73
   4   7   1   42.22    2.58
   4   7   1   36.37    2.57
  -4   7  -1   45.86    2.71
  -4   7  -1   37.16    2.70
   5  -7   1   -0.12    0.93
  -5  -7  -1    0.51    0.93
   5   7   1   -0.58    1.39
   5   7   1    0.49    1.32
  -5   7  -1    1.67    1.45
   6  -7   1    5.30    1.32
  -6   7  -1    7.77    1.82
   6   7   1    6.82    1.75
  -7  -7  -1   13.99    1.82
   7  -7   1   13.95    1.72
   7   7   1   10.58    2.10
  -7   7  -1   12.13    2.21
  -8  -7  -1    9.39    1.79
   8  -7   1   15.65    1.92
   8   7   1   12.21    2.33
  -8   7  -1   13.26    2.40
   9  -7   1    7.98    1.80
  -9  -7  -1    9.70    1.95
   9   7   1    7.09    2.41
  -9   7  -1    8.36    2.41
 -10  -7  -1   39.72    3.10
  10  -7   1   38.59    3.05
  10   7   1   41.08    3.85
 -10   7  -1   36.39    3.65
  11  -7   1    1.36    1.70
 -11   7  -1    3.13    2.52
  11   7   1    0.35    2.38
 -12   7  -1   13.30    3.09
  12   7   1   12.59    3.04
 -13   7  -1    2.46    2.91
  13   7   1    3.18    2.69
 -14   7  -1   15.82    3.51
  14   7   1   11.93    3.44
 -15   7  -1    0.36    3.16
  15   7   1    0.32    2.95
  16   7   1    6.23    3.50
 -16   7  -1    5.00    3.42
 -17   8   1   -2.93    3.33
  17   8  -1    4.99    3.67
  16   8  -1    9.70    3.66
 -16   8   1    5.41    3.37
  15   8  -1    3.90    3.07
 -15   8   1    0.22    3.05
 -14   8   1    3.38    2.98
  14   8  -1   -0.56    2.69
  13   8  -1    0.78    2.59
 -13   8   1    0.75    2.67
 -12   8   1    8.21    2.86
  12   8  -1    9.35    2.82
 -11   8   1    1.43    2.42
  11   8  -1    4.20    2.39
  10  -8  -1   -0.94    1.37
  10   8  -1   -1.95    2.02
 -10   8   1    2.65    2.31
   9  -8  -1    1.70    1.37
  -9   8   1    2.34    2.16
   9   8  -1   -0.14    1.91
   8  -8  -1   19.54    1.88
  -8   8   1   18.98    2.56
   8   8  -1   19.48    2.53
   7  -8  -1   12.72    1.45
  -7  -8   1   10.44    1.34
   7   8  -1   10.32    1.93
  -7   8   1    5.87    2.03
   6  -8  -1    0.82    0.80
   6   8  -1    0.55    1.42
  -6   8   1    2.52    1.64
   6   8  -1    2.14    1.52
   5   8  -1   44.53    2.87
  -5   8   1   44.41    3.00
   5   8  -1   43.89    2.83
  -5   8   1   47.88    2.95
   4   8  -1   16.80    1.62
   4   8  -1   15.20    1.50
  -4   8   1   15.64    1.67
  -4   8   1   13.54    1.55
  -3  -8   1   16.46    2.93
  -3   8   1   16.07    1.42
  -3   8   1   14.71    1.37
   3   8  -1   17.47    1.35
  -2  -8   1    2.76    2.48
   1  -8  -1   10.16    2.70
  -1  -8   1   11.52    2.72
   0  -8   1   30.04    3.39
   0  -8  -1   29.34    3.32
  -1  -8  -1   87.92    5.52
  -2  -8  -1    0.74    2.45
  -2   8  -1   -0.55    0.84
  -2   8  -1   -0.41    0.86
  -3   8  -1    1.04    1.12
  -3   8  -1    0.37    1.13
   3   8   1    0.74    0.99
   3   8   1   -1.64    1.09
  -4   8  -1    4.42    1.38
   4   8   1    4.07    1.36
  -4   8  -1    4.39    1.44
   4   8   1    4.49    1.29
   5  -8   1   28.81    1.82
   5   8   1   30.66    2.47
   5   8   1   32.90    2.56
  -5   8  -1   36.10    2.77
   6  -8   1    0.49    1.03
   6   8   1    0.14    1.65
  -6   8  -1   -0.90    1.67
   7  -8   1   11.26    1.57
  -7   8  -1   14.80    2.27
   7   8   1   12.02    2.21
   8  -8   1   -0.34    1.22
   8   8   1    0.31    1.91
  -8   8  -1    1.17    2.00
   9  -8   1   24.49    2.22
  -9   8  -1   18.07    2.86
   9   8   1   20.73    2.95
 -10   8  -1   -3.70    2.13
  10   8   1    1.94    2.41
  11   8   1    5.16    2.62
 -11   8  -1    4.35    2.59
  12   8   1   17.70    3.31
 -12   8  -1   16.80    3.28
 -13   8  -1    2.32    2.83
  13   8   1    1.06    2.72
 -14   8  -1   10.58    3.21
  14   8   1    8.00    3.36
 -15   8  -1    0.33    3.13
  15   8   1    1.49    3.13
  16   8   1   -0.88    3.26
 -16   8  -1    0.56    3.43
 -16   9   1    2.45    3.29
  16   9  -1    2.70    3.41
 -15   9   1    2.93    3.09
  15   9  -1    6.23    3.37
  14   9  -1    7.71    3.07
 -14   9   1    2.75    3.05
 -13   9   1    5.01    2.85
  13   9  -1    8.46    2.95
 -12   9   1    3.72    2.65
  12   9  -1    0.02    2.47
 -11   9   1   -1.11    2.36
  11   9  -1    0.47    2.37
 -10   9   1    4.24    2.44
  10   9  -1   -1.97    2.07
  -9   9   1    3.07    2.23
   9   9  -1    1.71    2.06
  -8   9   1   14.75    2.48
   8   9  -1   17.55    2.43
  -7   9   1   -0.91    1.75
   7   9  -1    0.81    1.69
   6   9  -1   13.59    1.98
  -6   9   1   15.48    2.10
   6   9  -1   16.95    1.99
  -6   9   1   17.74    2.11
  -5   9   1    3.29    1.54
   5   9  -1    0.92    1.45
  -5   9   1    6.32    1.55
   5   9  -1    2.21    1.38
  -4  -9   1   19.66    3.11
  -4   9   1   19.25    1.74
   4   9  -1   14.11    1.67
   4   9  -1   18.41    1.63
  -4   9   1   18.93    1.79
  -3  -9   1   -2.14    2.70
  -3   9   1   -1.71    0.89
  -3   9   1   -1.96    0.97
  -2  -9   1   95.95    5.86
   2  -9  -1   83.67    5.97
   1  -9  -1   41.40    4.06
  -1  -9   1   47.80    4.56
   0  -9   1    0.36    2.62
   0  -9  -1   -4.16    2.58
  -1  -9  -1    6.38    2.87
  -2  -9  -1    0.28    2.67
  -2   9  -1    0.59    0.94
  -2   9  -1    1.96    0.93
   3   9   1    0.79    1.13
  -3   9  -1    0.81    1.19
   3   9   1    1.60    1.07
  -3   9  -1   -0.69    1.19
   4   9   1    1.75    1.28
  -4   9  -1    2.24    1.44
  -4   9  -1    1.06    1.40
   4   9   1    2.87    1.43
   5   9   1    3.21    1.58
  -5   9  -1    4.30    1.69
   5   9   1    2.82    1.51
  -5   9  -1    2.40    1.63
  -6   9  -1   12.25    2.09
   6   9   1   13.98    2.17
   7   9   1    7.48    2.07
  -7   9  -1    5.09    2.01
  -8   9  -1   18.23    2.57
   8   9   1   14.95    2.59
   9   9   1   10.14    2.56
  -9   9  -1    9.40    2.54
 -10   9  -1   13.17    2.76
  10   9   1   10.72    2.83
 -11   9  -1    1.65    2.64
  11   9   1    1.96    2.48
  12   9   1    0.96    2.62
 -12   9  -1    2.98    2.72
 -13   9  -1    6.12    3.17
  13   9   1   12.53    3.37
 -14   9  -1    0.99    3.06
  14   9   1    4.28    3.21
  15   9   1    7.73    3.45
 -15   9  -1    1.74    3.33
  16   9   1    5.52    3.66
 -16  10   1    1.51    3.20
  16  10  -1    8.40    3.71
  15  10  -1   24.80    4.27
 -15  10   1   17.62    3.79
  14  10  -1    5.40    3.14
 -14  10   1    0.31    2.94
  13  10  -1    2.20    2.78
 -13  10   1    1.80    2.87
 -12  10   1    7.93    2.91
  12  10  -1    3.27    2.82
  11  10  -1    1.68    2.51
 -11  10   1    4.49    2.61
 -10  10   1    2.09    2.33
  10  10  -1    0.18    2.25
  -9  10   1   -2.12    2.12
   9  10  -1    4.25    2.22
  -8  10   1    5.69    2.22
   8  10  -1    5.77    2.20
   7  10  -1   17.75    2.40
  -7  10   1   23.13    2.56
  -6  10   1    1.56    1.73
   6  10  -1   -1.08    1.63
  -5  10   1    1.15    1.44
   5  10  -1   -0.18    1.42
  -5  10   1    1.45    1.52
   5  10  -1   -0.47    1.31
  -4 -10   1    0.32    2.66
   4  10  -1   -0.24    1.13
  -4  10   1    0.98    1.36
   4  10  -1    0.52    1.30
  -4  10   1   -1.95    1.24
  -3 -10   1   16.24    3.34
  -3  10   1   10.16    1.33
  -3  10   1   10.90    1.28
   2 -10  -1   16.29    3.47
  -2 -10   1   16.78    3.33
  -1 -10   1    1.20    2.92
   1 -10  -1   -0.63    2.88
   0 -10  -1   38.91    4.25
   0 -10   1   45.62    4.32
  -1 -10  -1    1.03    2.83
  -2 -10  -1    3.64    2.92
  -2  10  -1    5.59    1.08
  -2  10  -1    5.64    1.08
   3  10   1   13.49    1.38
  -3  10  -1   12.73    1.59
  -3  10  -1   15.36    1.63
  -4  10  -1    8.11    1.59
   4  10   1    3.94    1.47
   4  10   1    7.81    1.34
  -4  10  -1    4.70    1.54
   5  10   1   14.36    1.99
  -5  10  -1   14.76    2.08
  -6  10  -1   13.10    2.19
   6  10   1   16.07    2.28
  -7  10  -1   11.42    2.22
   7  10   1   10.35    2.31
  -8  10  -1   11.58    2.44
   8  10   1   14.26    2.65
  -9  10  -1   11.39    2.56
   9  10   1    9.95    2.75
 -10  10  -1    2.41    2.44
  10  10   1   -1.75    2.38
 -11  10  -1    1.60    2.63
  11  10   1    3.33    2.73
  12  10   1   -2.80    2.54
 -12  10  -1   -4.24    2.60
 -13  10  -1    0.67    2.98
  13  10   1   -0.77    2.84
 -14  10  -1   -3.93    3.01
  14  10   1   -5.74    2.93
 -15  10  -1   -2.62    3.05
  15  10   1   -1.08    3.33
 -15  11   1    1.86    3.38
  15  11  -1    6.52    3.42
  14  11  -1    1.37    3.15
 -14  11   1    0.54    3.06
  13  11  -1    2.36    2.93
 -13  11   1    1.33    2.86
 -12  11   1    3.05    2.74
  12  11  -1    2.66    2.74
 -11  11   1    3.13    2.60
  11  11  -1   -0.08    2.56
 -10  11   1    5.29    2.57
  10  11  -1    2.18    2.51
   9  11  -1    0.84    2.26
  -9  11   1    1.04    2.27
  -8  11   1    1.75    2.15
   8  11  -1    2.31    2.14
  -7  11   1    3.17    2.04
   7  11  -1    5.73    2.10
   6  11  -1   -0.78    1.74
  -6  11   1    0.59    1.83
   5  11  -1    0.47    1.56
  -5  11   1    3.63    1.67
  -4 -11   1    6.39    3.11
  -4  11   1    3.25    1.47
   4  11  -1    3.80    1.44
   4  11  -1    5.63    1.36
  -3 -11   1    5.08    3.19
   3 -11  -1    4.53    3.36
  -2 -11   1   20.54    3.72
   2 -11  -1   11.89    3.55
  -1 -11   1    5.35    3.11
   1 -11  -1    0.60    3.08
   0 -11  -1    0.82    3.11
   0 -11   1    2.97    3.15
  -1 -11  -1    2.96    3.19
   1 -11   1    3.06    3.24
  -2 -11  -1    0.33    3.02
  -2  11  -1    1.05    1.05
  -2  11  -1    1.25    1.00
  -3  11  -1    9.13    1.52
  -4  11  -1   12.11    1.86
   4  11   1   16.79    1.89
   5  11   1    0.50    1.71
  -5  11  -1    0.62    1.69
   6  11   1    1.86    1.89
  -6  11  -1    0.76    1.86
   7  11   1    7.38    2.31
  -7  11  -1    6.27    2.14
   8  11   1    1.65    2.30
  -8  11  -1    0.74    2.13
   9  11   1    3.50    2.51
  -9  11  -1   -0.03    2.33
  10  11   1    6.74    2.74
 -10  11  -1    8.24    2.75
  11  11   1    6.62    3.01
 -11  11  -1   10.31    2.99
 -12  11  -1   -0.60    2.77
  12  11   1    5.76    3.07
 -13  11  -1    6.69    3.18
  13  11   1    5.52    3.30
 -14  11  -1   -1.99    3.10
  14  11   1    2.86    3.39
  14  12  -1    5.78    3.47
 -14  12   1   -1.68    3.01
 -13  12   1    0.39    2.93
  13  12  -1    5.14    3.18
 -12  12   1    2.87    2.82
  12  12  -1   15.22    3.37
  11  12  -1    4.55    2.84
 -11  12   1    6.23    2.82
  10  12  -1   13.63    2.97
 -10  12   1   10.15    2.76
   9  12  -1    1.35    2.34
  -9  12   1   -2.23    2.27
  -8  12   1   -0.76    2.13
   8  12  -1    1.05    2.13
   7  12  -1    6.04    2.13
  -7  12   1    7.16    2.17
  -6  12   1   41.37    3.20
   6  12  -1   35.54    2.99
  -5  12   1    0.78    1.67
   5  12  -1   -0.03    1.55
  -4 -12   1   24.51    3.89
  -4  12   1   17.45    1.93
   3 -12  -1    9.13    3.75
  -3 -12   1    5.94    3.56
  -2 -12   1   14.08    3.90
   2 -12  -1   19.41    4.17
   1 -12  -1   12.69    3.79
  -1 -12   1   14.01    3.85
   0 -12  -1    3.83    3.36
   0 -12   1    1.89    3.40
  -1 -12  -1   18.20    3.99
   1 -12   1   17.51    3.94
  -2 -12  -1    0.55    3.26
  -3  12  -1    3.20    1.39
  -4  12  -1   15.25    1.99
   4  12   1   15.37    1.91
  -5  12  -1   13.32    2.10
   5  12   1   14.25    2.08
  -6  12  -1    3.71    1.97
   6  12   1   -1.07    1.97
  -7  12  -1   -1.31    2.04
   7  12   1    0.96    2.20
  -8  12  -1    5.28    2.40
   8  12   1    7.42    2.57
   9  12   1   27.36    3.47
  -9  12  -1   26.71    3.31
  10  12   1    1.86    2.64
 -10  12  -1   -1.68    2.54
 -11  12  -1    4.70    2.85
  11  12   1    6.83    3.14
 -12  12  -1    4.64    3.12
  12  12   1    6.08    3.15
 -13  12  -1    4.62    3.19
  13  12   1   14.40    3.81
 -13  13   1   -1.46    2.96
  13  13  -1    2.17    3.26
 -12  13   1    2.00    2.91
  12  13  -1   -5.11    2.93
 -11  13   1    0.24    2.71
  11  13  -1    1.05    2.84
  10  13  -1    1.07    2.66
 -10  13   1    3.04    2.64
   9  13  -1   16.07    2.88
  -9  13   1   10.94    2.71
  -8  13   1    0.98    2.27
   8  13  -1   -0.23    2.20
   7  13  -1   -2.61    1.99
  -7  13   1    2.02    2.01
   6  13  -1   17.06    2.31
  -6  13   1   10.55    2.16
  -5  13   1    0.56    1.72
   5  13  -1    0.97    1.65
  -4 -13   1    1.83    3.35
   4 -13  -1    0.43    3.84
  -4  13   1    3.12    1.52
   3 -13  -1   -2.24    3.53
  -3 -13   1   -4.16    3.34
  -2 -13   1    1.82    3.62
   2 -13  -1    5.89    3.75
   1 -13  -1    4.22    3.62
  -1 -13   1   -0.13    3.49
   0 -13   1   10.88    3.95
   0 -13  -1    6.96    3.63
   1 -13   1    6.88    3.81
  -1 -13  -1    6.27    3.79
  -2 -13  -1   13.48    3.95
   2 -13   1   24.37    4.51
  -3  13  -1   -2.26    1.35
   4  13   1    3.96    1.64
  -4  13  -1   -0.12    1.59
  -5  13  -1    6.46    1.93
   5  13   1   10.55    2.10
  -6  13  -1    9.59    2.15
   6  13   1    5.94    2.23
   7  13   1    9.30    2.55
  -7  13  -1   12.82    2.41
  -8  13  -1   -0.28    2.27
   8  13   1    1.39    2.45
   9  13   1   -2.15    2.57
  -9  13  -1   -0.99    2.53
  10  13   1   15.23    3.23
 -10  13  -1    6.39    2.88
  11  13   1    3.85    3.10
 -11  13  -1    5.50    2.99
 -12  13  -1    3.84    3.17
  12  13   1    4.95    3.51
  13  13   1   -0.57    3.33
 -13  13  -1   -2.83    3.03
 -12  14   1    1.19    2.89
  12  14  -1   -0.60    3.10
 -11  14   1    0.19    2.81
  11  14  -1    0.81    3.08
 -10  14   1    9.35    2.89
  10  14  -1   16.91    3.26
  -9  14   1   -0.08    2.46
   9  14  -1   -3.21    2.48
   8  14  -1    2.10    2.44
  -8  14   1    7.61    2.54
  -7  14   1    1.61    2.17
   7  14  -1   -1.92    2.17
   6  14  -1    2.11    2.04
  -6  14   1    1.74    1.98
   5 -14  -1    0.15    4.16
  -5  14   1    4.93    1.87
   4 -14  -1   -6.59    3.74
   3 -14  -1   -0.65    3.99
  -3 -14   1   -0.37    3.68
  -2 -14   1   -4.64    3.84
   2 -14  -1    7.63    4.11
   1 -14  -1    9.75    4.09
  -1 -14   1    4.91    3.98
   0 -14   1    4.25    3.98
   0 -14  -1    9.85    4.08
   1 -14   1   11.49    4.46
  -1 -14  -1   20.59    4.72
  -2 -14  -1    2.15    3.72
   2 -14   1    0.63    3.88
   3 -14   1   -0.79    4.13
  -3  14  -1   -0.18    1.41
  -4  14  -1    3.47    1.70
  -5  14  -1    5.15    1.96
   5  14   1    7.01    2.01
   6  14   1    6.63    2.26
  -6  14  -1   -1.01    2.11
  -7  14  -1    2.08    2.24
   7  14   1   -3.14    2.25
  -8  14  -1    5.69    2.62
   8  14   1   11.50    2.87
  -9  14  -1    3.33    2.68
   9  14   1    6.07    2.89
  10  14   1    6.08    3.13
 -10  14  -1   -1.41    2.73
 -11  14  -1   -0.16    2.85
  11  14   1    2.36    3.35
  12  14   1    5.24    3.49
 -12  14  -1    6.27    3.30
  11  15  -1    9.38    3.43
 -11  15   1    4.20    2.88
 -10  15   1    0.86    2.73
  10  15  -1   -2.01    2.79
  -9  15   1    1.95    2.53
   9  15  -1   -0.01    2.68
  -8  15   1    1.33    2.36
   8  15  -1    0.84    2.53
  -7  15   1    2.15    2.18
   7  15  -1    3.21    2.35
   6 -15  -1   12.51    4.92
  -6  15   1    6.56    2.17
   5 -15  -1    2.04    4.29
  -5  15   1    0.34    1.80
   4 -15  -1   -5.93    4.15
  -3 -15   1   -2.74    3.97
   3 -15  -1    2.43    4.30
  -2 -15   1   -6.49    4.09
   2 -15  -1    8.15    4.46
  -1 -15   1   -2.03    4.11
   1 -15  -1    0.94    4.13
   0 -15   1    1.27    4.17
   0 -15  -1    0.00    4.12
   1 -15   1    6.53    4.37
  -1 -15  -1   -2.09    3.98
   2 -15   1   -1.63    4.21
  -2 -15  -1   -2.33    3.87
   3 -15   1    2.66    4.24
   4 -15   1    9.98    4.77
  -4  15  -1    9.50    1.94
  -5  15  -1    5.28    2.05
  -6  15  -1   12.41    2.52
   6  15   1   22.32    2.76
  -7  15  -1    6.47    2.45
   7  15   1    5.98    2.67
  -8  15  -1    1.89    2.53
   8  15   1    9.08    2.81
  -9  15  -1    1.44    2.70
   9  15   1   -2.81    2.79
  10  15   1    6.96    3.34
 -10  15  -1    3.39    2.85
  10  16  -1   20.45    3.62
 -10  16   1   13.44    3.06
  -9  16   1   11.00    2.80
   9  16  -1   18.71    3.34
  -8  16   1   20.93    2.91
   8  16  -1   18.54    3.18
   7 -16  -1   12.21    5.20
   7  16  -1   13.66    2.68
  -7  16   1    9.73    2.38
   6 -16  -1    3.66    4.75
  -6  16   1    1.88    2.01
   5 -16  -1   -1.78    4.53
   4 -16  -1   20.15    5.37
  -3 -16   1    0.76    4.35
   3 -16  -1    5.01    4.78
   2 -16  -1   11.53    4.91
  -2 -16   1    2.57    4.52
   1 -16  -1   -3.06    4.32
  -1 -16   1   -4.15    4.37
   0 -16  -1    2.23    4.55
   0 -16   1   -0.96    4.46
   1 -16   1    1.14    4.59
  -1 -16  -1   -1.52    4.31
  -2 -16  -1    4.20    4.41
   2 -16   1    6.86    4.73
   3 -16   1    2.07    4.60
   4 -16   1    4.50    4.64
  -4  16  -1   -3.55    1.69
   5 -16   1    8.41    4.91
  -5  16  -1    0.92    2.00
   6  16   1    1.86    2.24
  -6  16  -1    0.78    2.11
   7  16   1   -3.36    2.36
  -7  16  -1   -1.00    2.28
   8  16   1   43.88    4.08
  -9  16  -1   -3.69    2.59
   9  16   1    3.58    3.03
   8 -17  -1   -5.35    5.06
   8  17  -1    4.03    2.68
  -8  17   1   -1.84    2.31
   7 -17  -1    4.93    5.24
   7  17  -1   15.99    2.75
  -7  17   1   12.63    2.47
   6 -17  -1    3.78    4.99
  -6  17   1    0.10    1.96
   5 -17  -1    5.85    5.19
   4 -17  -1    5.62    5.07
  -3 -17   1   -2.18    4.55
   3 -17  -1   -3.99    4.78
   2 -17  -1    6.45    4.96
  -2 -17   1   -3.45    4.69
   1 -17  -1   -7.98    4.65
  -1 -17   1    7.04    5.02
   0 -17   1    2.53    4.84
   0 -17  -1   -0.22    4.70
   1 -17   1    3.84    4.97
  -1 -17  -1   -0.23    4.63
   2 -17   1   10.01    5.09
   3 -17   1    2.86    4.92
   4 -17   1    0.96    4.90
   5 -17   1    2.54    4.95
  -5  17  -1   -3.36    1.95
   6 -17   1   -0.96    4.98
  -6  17  -1    0.23    2.23
   7  17   1   -2.35    2.52
  -7  17  -1    2.59    2.45
   6 -18  -1    2.21    5.36
   5 -18  -1   -4.88    5.10
   4 -18  -1   -4.00    5.15
   3 -18  -1    3.25    5.09
  -2 -18   1    6.10    5.30
   2 -18  -1    1.90    5.17
   1 -18  -1   10.68    5.59
  -1 -18   1   -5.99    5.06
   0 -18  -1    7.74    5.40
   0 -18   1    9.31    5.60
   1 -18   1    2.53    5.38
  -1 -18  -1   -6.82    4.83
   2 -18   1    1.90    5.39
   3 -18   1    7.31    5.59
   4 -18   1    3.64    5.52
   5 -18   1   -2.76    5.13
  19   0  -2   17.16    4.38
 -19   0   2   19.81    4.30
 -18   0   2    1.72    3.42
  18   0  -2    2.38    3.27
  17   0  -2   -0.82    3.03
 -17   0   2    3.56    3.18
  16   0  -2    7.42    3.08
 -16   0   2    1.86    3.14
  15   0  -2   43.19    4.53
 -15   0   2   40.27    4.41
  14   0  -2    3.30    2.55
 -14   0   2    3.35    2.55
  13   0  -2    5.04    2.53
 -13   0   2    7.83    2.71
 -12   0   2    2.85    2.43
  12   0  -2    2.00    2.13
  11   0  -2   22.63    2.80
 -11   0   2   16.27    2.75
 -10   0   2    0.27    1.89
  10   0  -2    1.42    1.74
   9   0  -2   17.53    2.26
  -9   0   2   14.30    2.35
  -8   0   2   80.64    4.51
   8   0  -2   77.40    4.36
  -7   0   2  194.32    8.46
   7   0  -2  183.45    8.36
   6   0  -2   94.05    4.75
  -6   0   2  100.78    4.90
   5   0  -2   61.24    3.40
  -5   0   2   59.92    3.43
  -4   0   2  235.51    9.36
   4   0  -2  209.29    9.32
  -3   0   2    9.72    1.15
   3   0  -2   12.77    1.20
   2   0  -2    0.25    0.54
  -2   0   2    0.53    0.55
  -2   0   2    0.10    0.50
   2   0  -2    0.26    0.50
   1   0  -2   -0.63    0.38
   1   0  -2   -0.94    0.41
  -1   0   2   -1.07    0.40
  -1   0   2   -1.08    0.40
   0   0   2   -1.25    0.47
   0   0  -2   -0.34    0.50
   0   0   2   -0.63    0.43
   0   0  -2   -0.87    0.41
  -1   0  -2   28.20    1.68
   1   0   2   24.60    1.63
   2   0   2   30.74    2.06
  -2   0  -2   28.66    2.16
  -3   0  -2    4.48    1.44
   3   0   2    5.46    1.27
  -4   0  -2   64.25    3.50
   4   0   2   57.20    3.34
   5   0   2   56.18    3.33
  -5   0  -2   59.48    3.59
  -6   0  -2    5.43    1.80
   6   0   2    5.67    1.65
   7   0   2   13.10    2.01
  -7   0  -2   11.59    2.10
   8   0   2   13.15    2.18
  -8   0  -2   14.98    2.37
  -9   0  -2   19.78    2.82
   9   0   2   23.47    2.77
  10   0   2   18.11    2.79
 -10   0  -2   20.63    3.10
  11   0   2    5.86    2.41
 -11   0  -2   -0.71    2.48
  12   0   2   43.37    4.20
 -12   0  -2   43.52    4.40
  13   0   2   21.51    3.42
 -13   0  -2   21.81    3.63
  14   0   2   39.40    4.44
 -14   0  -2   42.81    4.69
  15   0   2   -2.46    2.85
 -15   0  -2    2.07    3.18
 -16   0  -2   38.11    4.98
  16   0   2   50.40    5.24
  17   0   2    3.56    3.47
 -17   0  -2   -1.98    3.33
  19  -1  -2   -4.07    3.22
 -19  -1   2    4.81    3.45
 -19   1   2   -0.94    3.49
  19   1  -2    2.37    3.58
  18  -1  -2    0.09    3.28
 -18  -1   2    6.34    3.52
  18   1  -2    5.75    3.42
 -18   1   2    4.34    3.47
 -17  -1   2    9.42    3.49
  17  -1  -2   17.51    3.81
  17   1  -2   15.88    3.96
 -17   1   2   15.57    3.86
  16  -1  -2    0.64    2.83
 -16  -1   2   -3.74    2.88
 -16   1   2    0.04    2.94
  16   1  -2    0.57    2.82
 -15  -1   2    5.17    2.98
  15  -1  -2    5.06    2.84
 -15   1   2    1.48    2.88
  15   1  -2    6.57    3.02
 -14  -1   2   -2.13    2.50
  14  -1  -2    0.33    2.37
 -14   1   2    1.69    2.68
  14   1  -2    3.25    2.60
  13  -1  -2   16.02    2.94
 -13  -1   2   16.87    2.96
 -13   1   2    9.88    2.91
  13   1  -2    9.68    2.80
 -12  -1   2   29.31    3.37
  12  -1  -2   27.16    3.25
  12   1  -2   36.16    3.58
 -12   1   2   22.49    3.25
 -11  -1   2    3.39    2.33
  11  -1  -2    4.46    2.07
 -11   1   2    5.62    2.38
  11   1  -2    8.42    2.16
  10  -1  -2    5.57    1.99
 -10  -1   2    5.96    2.15
 -10   1   2    5.75    2.20
  10   1  -2    6.74    1.97
  -9  -1   2    0.43    1.76
   9  -1  -2    1.35    1.63
  -9   1   2    0.44    1.82
   9   1  -2    3.32    1.65
  -8  -1   2    3.22    1.71
   8  -1  -2    2.83    1.62
   8   1  -2    2.50    1.56
  -8   1   2    2.26    1.77
  -7  -1   2    4.45    1.65
   7  -1  -2    4.67    1.57
  -7   1   2    4.81    1.80
   7   1  -2    3.10    1.49
   6  -1  -2  123.96    5.82
  -6  -1   2  132.34    5.88
  -6   1   2  125.30    5.95
   6   1  -2  121.45    5.83
   5  -1  -2  193.68    8.19
  -5  -1   2  187.16    8.19
  -5   1   2  194.85    8.21
   5   1  -2  181.83    8.14
  -4  -1   2    1.36    1.22
   4  -1  -2    0.93    1.16
   4   1  -2   -1.65    1.10
  -4   1   2    0.71    1.21
  -3  -1   2  229.31    9.50
   3  -1  -2  226.11    9.51
   3   1  -2  220.49    9.51
   3   1  -2  232.65    9.51
  -3   1   2  239.46    9.52
  -3   1   2  234.52    9.53
   2  -1  -2   14.27    1.20
  -1  -1   2   -0.31    0.49
   1  -1  -2    0.38    0.47
   1  -1  -2   -0.09    0.49
  -1  -1   2    0.87    0.48
   1  -1  -2    0.02    0.55
   1   1  -2    0.45    0.46
  -1   1   2   -0.41    0.40
  -1   1   2   -0.54    0.42
   1   1  -2    0.18    0.40
  -1   1   2   -0.47    0.71
   0  -1  -2    8.76    0.76
  -1  -1  -2    4.19    0.91
   1  -1   2    4.73    0.85
  -1   1  -2    5.21    0.89
  -1   1  -2    3.64    0.76
   1   1   2    2.06    0.76
   2  -1   2   91.39    4.19
  -2  -1  -2   93.28    4.25
   2   1   2   88.08    4.18
  -2   1  -2   93.24    4.27
   3  -1   2    2.37    1.15
  -3  -1  -2    1.36    1.35
  -3   1  -2    3.30    1.36
   3   1   2    0.79    1.18
   4  -1   2   12.02    1.56
  -4  -1  -2    9.26    1.72
   4   1   2   12.70    1.62
  -4   1  -2   14.00    1.77
  -5  -1  -2    0.41    1.58
   5  -1   2   -0.43    1.32
  -5   1  -2    3.65    1.63
   5   1   2    0.71    1.30
   6  -1   2   -0.17    1.41
  -6  -1  -2    0.22    1.57
  -6   1  -2    0.50    1.65
   6   1   2    0.12    1.50
   7  -1   2    0.90    1.53
  -7  -1  -2    1.41    1.81
   7   1   2    1.80    1.56
  -7   1  -2    4.98    1.87
  -8  -1  -2    0.98    1.93
   8  -1   2    0.74    1.69
   8   1   2    1.55    1.71
  -8   1  -2    0.01    1.94
   9  -1   2    0.88    1.91
  -9  -1  -2    1.09    2.18
  -9   1  -2    0.72    2.06
   9   1   2    0.10    1.86
 -10  -1  -2   13.55    2.81
  10  -1   2   14.45    2.58
  10   1   2   13.36    2.63
 -10   1  -2   11.88    2.72
  11  -1   2   11.13    2.57
 -11  -1  -2    6.92    2.74
 -11   1  -2    9.85    2.81
  11   1   2   13.80    2.78
 -12  -1  -2   19.05    3.40
  12  -1   2   21.61    3.27
 -12   1  -2   20.72    3.40
  12   1   2   23.00    3.35
 -13  -1  -2    2.75    2.84
  13  -1   2    3.57    2.65
 -13   1  -2    1.22    2.78
  13   1   2    4.77    2.69
  14  -1   2   -0.35    2.66
 -14  -1  -2    1.06    3.03
 -14   1  -2   -5.51    2.74
  14   1   2    3.11    2.75
 -15  -1  -2   -1.58    3.10
  15  -1   2    2.80    2.84
  15   1   2    0.68    2.88
 -15   1  -2   -1.46    3.24
 -16  -1  -2    1.22    3.21
  16  -1   2    1.25    3.12
 -16   1  -2   -6.01    3.24
  16   1   2   -0.52    3.12
 -17  -1  -2    3.50    3.57
  17  -1   2    8.10    3.49
 -17   1  -2   -3.84    3.40
  17   1   2    3.70    3.52
 -19  -2   2    1.34    3.38
  19  -2  -2   -0.24    3.19
 -19   2   2   -7.48    3.30
  19   2  -2   -1.12    3.59
  18  -2  -2   -0.42    3.23
 -18  -2   2    3.11    3.19
 -18   2   2    4.26    3.47
  18   2  -2    0.76    3.30
  17  -2  -2   -0.44    2.99
 -17  -2   2   -3.74    2.84
  17   2  -2   -0.84    3.01
 -17   2   2   -1.44    3.11
 -16  -2   2   -1.53    2.79
  16  -2  -2   -1.13    2.72
  16   2  -2   -0.94    2.98
 -16   2   2   -3.49    2.82
 -15  -2   2    1.80    2.93
  15  -2  -2   -1.62    2.55
 -15   2   2    0.26    2.84
  15   2  -2    5.47    2.71
 -14  -2   2    2.16    2.62
  14  -2  -2    0.78    2.42
  14   2  -2    0.54    2.55
 -14   2   2   -2.51    2.52
 -13  -2   2    7.23    2.74
  13  -2  -2    7.07    2.44
 -13   2   2    4.71    2.61
  13   2  -2    7.82    2.60
  12  -2  -2    4.83    2.22
 -12  -2   2   -0.46    2.27
 -12   2   2    0.26    2.35
  12   2  -2    1.88    2.20
  11  -2  -2    2.60    2.01
 -11  -2   2    4.83    2.26
 -11   2   2    4.40    2.34
  11   2  -2    8.29    2.20
  10  -2  -2   -0.08    1.71
 -10  -2   2    4.40    2.05
 -10   2   2    2.42    2.01
  10   2  -2    0.60    1.76
  -9  -2   2   61.61    3.89
   9  -2  -2   59.79    3.80
  -9   2   2   57.25    4.04
   9   2  -2   60.86    3.89
  -8  -2   2   72.36    4.10
   8  -2  -2   69.22    4.02
  -8   2   2   73.98    4.26
   8   2  -2   66.03    4.05
  -7  -2   2   18.76    2.12
   7  -2  -2   17.22    2.03
  -7   2   2   15.32    2.15
   7   2  -2   17.20    1.96
   6  -2  -2   15.14    1.83
  -6  -2   2   12.65    1.82
  -6   2   2   15.87    1.95
   6   2  -2   11.48    1.72
  -5  -2   2    3.70    1.43
   5  -2  -2    4.83    1.41
   5   2  -2    4.59    1.32
  -5   2   2    3.57    1.53
   4  -2  -2   12.13    1.47
  -4  -2   2   11.54    1.45
   4   2  -2   11.14    1.43
  -4   2   2   12.47    1.56
   4   2  -2   13.11    1.43
   3  -2  -2   35.53    2.12
  -3  -2   2   34.78    2.15
   3   2  -2   33.06    2.09
  -3   2   2   34.91    2.13
   3   2  -2   35.83    2.13
  -3   2   2   32.27    2.15
  -2  -2   2   90.30    3.61
   2  -2  -2   85.21    3.58
  -2  -2   2   81.84    3.93
   2   2  -2   76.40    3.57
   2   2  -2   72.48    3.56
  -2   2   2   71.13    3.55
  -2   2   2   94.52    3.63
   1  -2  -2   -0.70    0.96
  -1  -2   2    0.84    0.61
   1  -2  -2    1.86    0.60
   1  -2  -2    0.76    0.60
  -1  -2   2    0.92    0.64
  -1   2   2   -0.13    0.48
   1   2  -2    0.97    0.58
  -1   2   2    0.59    0.54
   1   2  -2    0.45    0.51
   0  -2  -2  416.58   16.42
   0  -2  -2  410.36   16.41
   0  -2   2  428.52   16.44
   0   2  -2  378.25   16.44
   1  -2   2    7.37    1.03
  -1  -2  -2    7.50    1.07
  -1   2  -2    9.95    1.13
   1   2   2   10.03    1.04
   1   2   2    8.29    1.00
  -1   2  -2   10.77    1.05
  -2  -2  -2  161.47    7.34
   2  -2   2  185.80    7.37
  -2   2  -2  176.51    7.39
  -2   2  -2  177.14    7.41
   2   2   2  176.03    7.39
   2   2   2  165.86    7.36
  -3  -2  -2  180.00    7.77
   3  -2   2  183.18    7.72
   3   2   2  175.82    7.75
  -3   2  -2  183.94    7.82
   4  -2   2    1.28    1.28
  -4  -2  -2    0.76    1.42
   4   2   2    2.29    1.28
  -4   2  -2    3.83    1.48
   5  -2   2    1.56    1.37
  -5  -2  -2    1.44    1.52
   5   2   2    1.91    1.35
  -5   2  -2    1.14    1.50
   6  -2   2   11.02    1.76
  -6  -2  -2   11.22    1.97
   6   2   2   10.58    1.78
  -6   2  -2    8.40    1.89
   7  -2   2   26.39    2.56
  -7  -2  -2   27.95    2.71
  -7   2  -2   27.57    2.76
   7   2   2   30.09    2.66
  -8  -2  -2    5.20    2.17
   8  -2   2    5.74    1.90
   8   2   2    6.35    1.97
  -8   2  -2    4.95    2.01
  -9  -2  -2   27.16    3.08
   9  -2   2   28.74    2.99
  -9   2  -2   25.93    3.04
   9   2   2   29.66    3.03
  10  -2   2    7.83    2.29
 -10  -2  -2   11.53    2.64
 -10   2  -2    7.08    2.53
  10   2   2    8.37    2.42
 -11  -2  -2    2.54    2.52
  11  -2   2   -1.96    1.95
 -11   2  -2    1.87    2.49
  11   2   2    1.61    2.34
  12  -2   2    4.11    2.37
 -12  -2  -2    4.47    2.76
 -12   2  -2    4.54    2.75
  12   2   2    5.92    2.63
 -13  -2  -2    3.38    2.84
  13  -2   2    4.36    2.64
  13   2   2    2.25    2.56
 -13   2  -2    0.48    2.86
 -14  -2  -2   -6.38    2.79
  14  -2   2    0.91    2.74
 -14   2  -2    0.06    3.02
  14   2   2    1.79    2.79
  15  -2   2    3.77    3.00
 -15  -2  -2    8.23    3.36
  15   2   2    4.92    3.08
 -15   2  -2    4.83    3.44
  16  -2   2   20.00    3.93
 -16  -2  -2   10.97    3.72
 -16   2  -2   10.60    3.91
  16   2   2   19.98    4.11
 -17  -2  -2    2.46    3.32
  17  -2   2   -5.77    2.86
 -17   2  -2   -2.02    3.57
  17   2   2    0.47    3.46
  19  -3  -2    0.74    3.36
 -19   3   2    2.16    3.70
  19   3  -2   -1.49    3.62
 -18  -3   2    6.32    3.15
  18  -3  -2    1.22    3.32
  18   3  -2    6.69    3.53
 -18   3   2    0.36    3.41
 -17  -3   2    2.67    3.05
  17  -3  -2   11.52    3.37
  17   3  -2    2.06    3.29
 -17   3   2    3.54    3.36
 -16  -3   2    1.68    2.89
  16  -3  -2   -3.64    2.65
 -16   3   2   -3.08    2.99
  16   3  -2    1.50    2.94
 -15  -3   2   -2.10    2.56
  15  -3  -2    0.75    2.57
 -15   3   2   -2.60    2.82
  15   3  -2    4.85    2.79
  14  -3  -2   14.32    2.94
 -14  -3   2    9.95    2.88
 -14   3   2    9.65    2.99
  14   3  -2   13.11    3.04
 -13  -3   2   15.34    2.94
  13  -3  -2   19.17    2.82
 -13   3   2   11.58    3.04
  13   3  -2   14.06    2.96
 -12  -3   2   30.06    3.33
  12  -3  -2   30.63    3.25
 -12   3   2   27.13    3.47
  12   3  -2   34.77    3.52
 -11  -3   2    9.17    2.40
  11  -3  -2   10.49    2.28
  11   3  -2   10.24    2.35
 -11   3   2    6.48    2.46
  10  -3  -2   63.17    3.91
 -10  -3   2   61.03    4.00
  10   3  -2   57.83    4.07
 -10   3   2   55.59    4.13
   9  -3  -2  102.47    5.23
  -9  -3   2   92.31    5.16
   9   3  -2  101.64    5.33
  -9   3   2   99.49    5.42
  -8  -3   2   48.96    3.28
   8  -3  -2   46.97    3.20
  -8   3   2   47.64    3.37
   8   3  -2   45.47    3.29
   7  -3  -2   39.39    2.81
  -7  -3   2   41.30    2.94
  -7   3   2   42.30    3.09
   7   3  -2   35.88    2.89
   6  -3  -2  107.17    4.97
  -6  -3   2  104.60    4.97
  -6   3   2  103.95    5.08
   6   3  -2   94.80    4.95
  -5  -3   2  176.98    7.59
   5  -3  -2  186.05    7.63
   5   3  -2  162.97    7.58
  -5   3   2  176.53    7.69
  -4  -3   2    7.17    1.29
   4  -3  -2    6.93    1.27
  -4   3   2    7.29    1.29
   4   3  -2    8.93    1.28
  -4   3   2    7.65    1.47
   4   3  -2    8.15    1.32
  -3  -3   2  117.03    5.05
   3  -3  -2  125.87    5.09
  -3   3   2  120.19    5.14
   3   3  -2  100.28    5.04
  -3   3   2  123.14    5.09
   3   3  -2  111.46    5.07
  -2  -3   2  267.28   12.40
  -2   3   2  299.50   11.41
   2   3  -2  258.66   11.38
   2   3  -2  282.38   11.38
  -2   3   2  291.86   11.39
   1  -3  -2  154.40    5.87
   1  -3  -2  142.93    6.74
   1   3  -2  139.57    5.93
  -1   3   2  145.83    5.91
   1   3  -2  136.01    5.94
  -1   3   2  139.09    5.92
   0  -3  -2    2.40    1.68
   0   3   2    2.88    0.74
   0   3  -2    4.16    0.85
   0   3   2    2.45    0.72
   0   3  -2    2.19    0.78
   1  -3   2  182.79    7.66
   1   3   2  180.12    7.69
   1   3   2  175.46    7.68
  -1   3  -2  193.62    7.72
  -1   3  -2  194.29    7.75
  -2  -3  -2  275.72   11.15
   2  -3   2  268.48   11.15
  -2   3  -2  287.73   11.22
   2   3   2  253.17   11.14
   2   3   2  257.85   11.15
  -2   3  -2  283.03   11.23
  -3  -3  -2   -0.74    1.22
   3  -3   2    1.17    1.11
   3   3   2   -0.28    1.13
  -3   3  -2   -0.94    1.26
   3   3   2    0.48    1.16
  -4  -3  -2   26.83    2.40
   4  -3   2   23.34    2.15
   4   3   2   27.54    2.31
  -4   3  -2   30.35    2.43
   5  -3   2   71.45    3.74
  -5  -3  -2   64.50    3.81
  -5   3  -2   74.68    3.90
   5   3   2   67.24    3.79
   6  -3   2    3.88    1.54
  -6  -3  -2    4.77    1.80
   6   3   2    5.25    1.53
  -6   3  -2    6.92    1.82
   7  -3   2   -0.81    1.50
  -7  -3  -2    0.89    1.79
  -7   3  -2   -0.28    1.70
   7   3   2   -1.02    1.45
  -8  -3  -2   28.82    2.96
   8  -3   2   30.83    2.85
   8   3   2   34.66    3.08
  -8   3  -2   27.17    2.91
  -9  -3  -2   13.27    2.49
   9  -3   2   10.29    2.17
   9   3   2    9.34    2.29
  -9   3  -2    7.22    2.39
 -10  -3  -2    1.51    2.31
  10  -3   2   -1.30    1.85
 -10   3  -2    2.51    2.35
  10   3   2    0.38    2.06
  11  -3   2   -2.22    1.97
 -11  -3  -2    1.93    2.37
 -11   3  -2    2.12    2.52
  11   3   2    0.99    2.26
 -12  -3  -2    4.79    2.69
  12  -3   2    5.09    2.42
  12   3   2    1.04    2.51
 -12   3  -2    1.98    2.72
  13  -3   2    3.62    2.62
 -13  -3  -2    1.39    2.78
 -13   3  -2    5.15    3.03
  13   3   2    1.70    2.67
  14  -3   2   32.51    4.05
 -14  -3  -2   27.79    3.97
  14   3   2   27.77    4.05
 -14   3  -2   30.34    4.19
 -15  -3  -2    2.42    3.05
  15  -3   2    0.16    2.73
 -15   3  -2    4.01    3.35
  15   3   2   -1.24    2.97
 -16  -3  -2    3.02    3.15
  16  -3   2    2.01    3.04
 -16   3  -2   -0.03    3.50
  16   3   2    9.58    3.59
  17  -3   2    0.99    3.39
 -17   3  -2    3.95    3.66
  17   3   2    5.07    3.65
 -19   4   2    4.16    3.66
  19   4  -2    3.14    3.70
  18  -4  -2   -2.65    2.88
  18   4  -2   -0.36    3.19
 -18   4   2   -5.32    3.08
  17  -4  -2    7.71    3.06
  17   4  -2   -0.62    3.09
 -17   4   2   -0.83    3.11
  16  -4  -2   -1.70    2.64
 -16  -4   2   -0.82    2.50
 -16   4   2    0.36    3.12
  16   4  -2   -0.46    3.00
 -15  -4   2   -1.85    2.22
  15  -4  -2   -1.45    2.48
 -15   4   2    1.10    2.79
  15   4  -2   -0.55    2.70
  14  -4  -2    1.95    2.45
 -14  -4   2    6.52    2.58
  14   4  -2    2.03    2.50
 -14   4   2    8.74    2.99
  13  -4  -2    8.06    2.45
 -13  -4   2    5.23    2.52
  13   4  -2    9.81    2.69
 -13   4   2    4.05    2.72
  12  -4  -2   18.82    2.69
 -12  -4   2   13.57    2.76
 -12   4   2   12.66    2.91
  12   4  -2   15.43    2.72
 -11  -4   2   89.31    5.27
  11  -4  -2   94.65    5.31
 -11   4   2   94.42    5.59
  11   4  -2   97.93    5.58
  10  -4  -2   42.74    3.33
 -10  -4   2   44.20    3.45
 -10   4   2   43.51    3.70
  10   4  -2   40.62    3.54
   9  -4  -2   77.25    4.18
  -9  -4   2   70.19    4.21
   9   4  -2   71.19    4.32
  -9   4   2   68.35    4.43
   8  -4  -2  146.36    6.99
  -8  -4   2  156.90    7.07
  -8   4   2  149.77    7.20
   8   4  -2  155.19    7.20
  -7  -4   2  135.22    6.14
   7  -4  -2  130.86    6.11
   7   4  -2  124.96    6.19
  -7   4   2  135.79    6.34
  -6  -4   2    6.13    1.49
   6  -4  -2    3.97    1.39
  -6   4   2    3.05    1.58
   6   4  -2    5.68    1.50
   5  -4  -2  101.72    4.58
  -5  -4   2   93.64    4.56
  -5   4   2  110.84    4.81
   5   4  -2   97.11    4.65
   5   4  -2   88.62    4.62
  -4  -4   2   44.73    2.53
   4  -4  -2   45.17    2.54
   4   4  -2   42.68    2.59
  -4   4   2   46.68    2.67
   4   4  -2   42.07    2.60
  -4   4   2   44.50    2.74
  -3  -4   2   47.12    3.44
   3   4  -2   43.61    2.55
  -3   4   2   52.58    2.60
   3   4  -2   47.60    2.54
  -3   4   2   51.31    2.69
  -2  -4   2    0.41    1.74
  -2   4   2   -0.55    0.77
   2   4  -2    0.03    0.74
  -2   4   2    1.17    0.89
   2   4  -2    0.29    0.83
   1  -4  -2  111.38    5.73
   1   4  -2  110.30    4.69
  -1   4   2  106.18    4.67
  -1   4   2  116.15    4.67
   1   4  -2  112.27    4.73
   0  -4  -2  267.07   11.91
   0   4  -2  262.19   10.61
   0   4   2  253.76   10.55
   0   4   2  249.46   10.55
   0   4  -2  272.40   10.62
  -1   4  -2   23.55    1.81
   1   4   2   20.04    1.70
  -1   4  -2   29.55    1.79
   1   4   2   22.10    1.64
  -2  -4  -2    1.95    0.73
   2  -4   2   -0.41    0.87
  -2   4  -2    0.24    1.07
   2   4   2   -0.28    0.99
   2   4   2   -1.15    0.95
  -2   4  -2    1.16    1.14
  -3  -4  -2   54.68    3.06
   3  -4   2   58.71    3.03
   3   4   2   56.60    3.12
  -3   4  -2   58.89    3.22
   3   4   2   58.28    3.13
   4  -4   2   24.55    1.95
  -4  -4  -2   24.87    2.04
   4   4   2   22.23    2.03
  -4   4  -2   26.74    2.17
  -5  -4  -2  133.23    6.22
   5  -4   2  132.49    6.19
   5   4   2  131.25    6.24
  -5   4  -2  145.31    6.37
  -6  -4  -2    3.58    1.67
   6  -4   2    3.96    1.46
   6   4   2    5.92    1.62
  -6   4  -2    5.27    1.76
  -7  -4  -2   31.40    2.81
   7  -4   2   30.15    2.68
  -7   4  -2   31.51    2.81
   7   4   2   32.61    2.83
  -8  -4  -2   41.99    3.36
   8  -4   2   41.24    3.12
   8   4   2   39.74    3.40
  -8   4  -2   37.78    3.42
  -9  -4  -2   10.21    2.40
   9  -4   2   10.08    2.09
  -9   4  -2   11.03    2.44
   9   4   2    7.95    2.26
  10  -4   2   17.19    2.56
 -10  -4  -2   11.77    2.63
  10   4   2   13.28    2.67
 -10   4  -2   14.70    2.81
  11  -4   2   14.90    2.74
 -11  -4  -2   15.25    2.87
  11   4   2   18.13    3.05
 -11   4  -2   13.20    2.97
 -12  -4  -2    5.91    2.57
  12  -4   2    7.84    2.42
  12   4   2    5.31    2.60
 -12   4  -2    6.64    2.86
  13  -4   2    0.71    2.36
 -13  -4  -2    0.45    2.29
 -13   4  -2    0.80    2.75
  13   4   2   -0.83    2.53
  14  -4   2    5.50    2.85
 -14  -4  -2    0.61    2.62
 -14   4  -2    3.15    3.19
  14   4   2    1.31    2.78
  15  -4   2    4.81    2.82
  15   4   2    2.09    3.16
 -15   4  -2   -3.10    3.00
  16  -4   2   -0.22    2.90
  16   4   2    5.22    3.36
 -16   4  -2   -4.94    3.27
 -17   4  -2    7.62    3.90
  17   4   2   13.81    4.21
 -18   5   2   -1.95    3.34
  18   5  -2    3.35    3.60
 -17   5   2    0.83    3.26
  17   5  -2    2.12    3.30
  16  -5  -2    3.71    2.62
  16   5  -2    1.28    3.07
 -16   5   2   -0.08    3.08
  15  -5  -2    1.02    2.38
 -15  -5   2    1.89    2.18
 -15   5   2   -2.87    2.67
  15   5  -2    4.59    2.95
  14  -5  -2    1.47    2.13
 -14  -5   2    0.04    2.10
  14   5  -2    1.35    2.43
 -14   5   2    4.53    2.72
  13  -5  -2    8.07    2.35
 -13  -5   2   -3.28    1.88
  13   5  -2    3.01    2.35
 -13   5   2    0.47    2.62
 -12  -5   2   30.60    3.26
  12  -5  -2   27.01    3.14
 -12   5   2   30.61    3.53
  12   5  -2   27.37    3.38
  11  -5  -2    3.31    1.96
 -11  -5   2    0.90    2.05
  11   5  -2    1.22    2.07
 -11   5   2    8.04    2.53
  10  -5  -2    1.76    1.76
 -10  -5   2    8.77    2.13
 -10   5   2    8.08    2.29
  10   5  -2    4.72    2.06
   9  -5  -2   -1.75    1.49
  -9  -5   2    3.00    1.73
   9   5  -2    1.29    1.77
  -9   5   2    0.70    1.84
   8  -5  -2    7.65    1.65
  -8  -5   2    7.61    1.81
  -8   5   2    8.75    1.97
   8   5  -2    5.17    1.82
   7  -5  -2   19.35    1.95
  -7  -5   2   19.90    2.00
  -7   5   2   21.40    2.29
   7   5  -2   16.32    2.06
   6  -5  -2   63.52    3.28
  -6  -5   2   57.25    3.26
   6   5  -2   58.02    3.47
  -6   5   2   59.73    3.56
   5  -5  -2   75.37    3.51
  -5  -5   2   70.79    3.48
   5   5  -2   66.21    3.62
  -5   5   2   72.17    3.65
   5   5  -2   64.33    3.60
  -5   5   2   72.86    3.79
  -4   5   2   40.03    2.49
  -4   5   2   46.49    2.61
   4   5  -2   36.06    2.41
   4   5  -2   38.04    2.40
  -3  -5   2   12.24    2.26
   3   5  -2    9.66    1.22
  -3   5   2   12.62    1.21
  -3   5   2   11.50    1.32
   3   5  -2   12.76    1.20
  -2  -5   2    7.34    2.10
   2   5  -2    9.01    0.88
  -2   5   2    7.94    0.90
  -2   5   2    5.14    0.97
   2   5  -2    6.54    0.95
   1  -5  -2   10.02    2.26
   1   5  -2   12.15    0.95
   1   5  -2   13.04    1.05
   0  -5  -2    1.47    2.04
   0   5  -2   -1.41    0.68
   0   5  -2    1.29    0.78
  -1  -5  -2   91.42    5.24
  -1   5  -2   97.39    4.14
   1   5   2   83.69    4.02
   1   5   2   89.59    4.02
  -1   5  -2   97.19    4.13
   2  -5   2   -0.34    0.53
  -2   5  -2   -0.93    1.05
   2   5   2    0.00    1.04
   2   5   2   -0.46    0.99
  -2   5  -2   -0.54    1.04
   3  -5   2  113.63    4.93
  -3   5  -2  113.49    5.10
   3   5   2  104.28    5.03
  -3   5  -2  116.77    5.13
   3   5   2  103.32    5.01
  -4  -5  -2    4.57    1.33
   4  -5   2    6.27    1.26
   4   5   2    4.78    1.45
   4   5   2    4.17    1.40
  -4   5  -2    4.93    1.51
  -5  -5  -2    0.28    1.37
   5  -5   2    0.24    1.16
   5   5   2    1.57    1.39
  -5   5  -2    0.85    1.47
  -6  -5  -2   22.52    2.24
   6  -5   2   24.15    2.11
  -6   5  -2   23.30    2.37
   6   5   2   21.47    2.29
   7  -5   2    8.22    1.70
  -7  -5  -2    5.48    1.85
   7   5   2    6.33    1.85
  -7   5  -2    5.86    1.97
   8  -5   2   21.67    2.35
  -8  -5  -2   24.72    2.67
  -8   5  -2   18.35    2.63
   8   5   2   19.95    2.63
  -9  -5  -2    3.01    2.01
   9  -5   2    2.65    1.74
   9   5   2   -0.09    1.95
  -9   5  -2    1.49    2.08
  10  -5   2    4.58    2.04
 -10  -5  -2    3.11    2.22
  10   5   2    4.47    2.33
 -10   5  -2    4.16    2.47
  11  -5   2    1.53    2.01
 -11  -5  -2    1.60    2.12
  11   5   2   -1.02    2.29
 -11   5  -2   -0.06    2.36
  12  -5   2   -1.96    1.98
 -12  -5  -2    1.30    2.05
  12   5   2   -1.18    2.41
 -12   5  -2    3.51    2.68
 -13  -5  -2    7.48    2.48
  13  -5   2    4.59    2.48
 -13   5  -2    5.28    3.04
  13   5   2    5.42    2.90
  14  -5   2    5.35    2.64
 -14   5  -2    3.03    3.23
  14   5   2   -0.02    2.77
  15  -5   2    4.65    2.80
  15   5   2    5.87    3.28
 -15   5  -2    9.52    3.63
 -16   5  -2    9.22    3.77
  16   5   2   -1.28    3.26
 -17   5  -2    9.20    4.01
  17   5   2   -1.13    3.55
  18   6  -2    4.34    3.59
 -18   6   2    0.43    3.31
  17   6  -2   -0.93    3.20
 -17   6   2    4.19    3.40
  16   6  -2    6.90    3.29
 -16   6   2   -2.14    2.96
  15  -6  -2    1.86    2.07
  15   6  -2    0.37    2.70
 -15   6   2    2.90    3.02
  14  -6  -2   10.37    2.46
  14   6  -2    9.33    3.01
 -14   6   2    8.12    3.09
  13  -6  -2    0.34    1.91
 -13  -6   2    1.68    1.99
  13   6  -2    4.76    2.46
 -13   6   2   -1.19    2.53
  12  -6  -2    4.87    1.98
 -12  -6   2    1.68    1.94
  12   6  -2    1.80    2.27
 -12   6   2   -1.93    2.30
 -11  -6   2    2.22    1.98
  11  -6  -2    0.96    1.85
  11   6  -2   -1.56    2.04
 -11   6   2    6.62    2.44
 -10  -6   2   27.85    2.81
  10  -6  -2   29.13    2.68
  10   6  -2   25.64    3.00
 -10   6   2   25.10    3.05
   9  -6  -2    0.61    1.51
  -9  -6   2    0.10    1.60
   9   6  -2   -0.65    1.77
  -9   6   2   -0.61    1.86
   8  -6  -2   21.53    2.14
  -8  -6   2   23.97    2.29
  -8   6   2   19.97    2.50
   8   6  -2   22.42    2.46
   7  -6  -2   14.55    1.70
  -7  -6   2   14.17    1.74
   7   6  -2   11.88    1.88
  -7   6   2   13.32    2.06
   6  -6  -2   25.30    2.06
  -6  -6   2   22.65    1.99
  -6   6   2   25.80    2.32
   6   6  -2   28.17    2.20
   6   6  -2   26.36    2.28
  -5  -6   2    0.44    0.65
   5  -6  -2    1.36    0.85
  -5   6   2    3.43    1.28
  -5   6   2    4.86    1.44
   5   6  -2    1.97    1.29
   5   6  -2    2.39    1.24
   4  -6  -2    1.81    0.82
  -4  -6   2    1.76    2.11
  -4   6   2   -0.05    1.04
   4   6  -2    1.61    1.10
   4   6  -2   -0.10    1.03
  -4   6   2    1.73    1.23
  -3  -6   2    8.28    2.23
   3   6  -2    4.27    1.04
  -3   6   2    5.05    0.98
  -3   6   2    4.09    1.12
   3   6  -2    4.13    0.94
   2  -6  -2    3.61    2.28
  -2  -6   2    3.44    2.22
   2   6  -2    9.21    0.80
  -2   6   2    5.73    0.84
   2   6  -2    4.92    0.92
  -2   6   2    6.38    0.93
   1  -6  -2   30.08    3.00
   0  -6  -2   10.94    2.43
   0   6  -2    7.47    0.88
   0   6  -2   10.81    0.97
  -1  -6  -2    5.47    2.29
  -1   6  -2    3.79    0.97
   1   6   2    2.55    0.86
   1   6   2    3.89    0.91
  -1   6  -2    5.41    1.01
   2   6   2   22.95    1.85
  -2   6  -2   28.68    2.00
  -2   6  -2   25.02    1.93
   2   6   2   24.24    1.85
   3   6   2  128.55    5.89
   3   6   2  126.23    5.93
  -3   6  -2  143.60    6.05
  -3   6  -2  139.62    6.02
  -4  -6  -2    0.43    0.30
   4  -6   2   -0.30    0.98
   4   6   2   -0.04    1.27
  -4   6  -2   -0.84    1.34
   4   6   2    0.32    1.24
  -5  -6  -2   -2.02    1.16
   5  -6   2    1.56    1.16
  -5   6  -2   -0.71    1.45
   5   6   2   -0.03    1.40
  -6  -6  -2    2.41    1.44
   6  -6   2    5.73    1.39
  -6   6  -2    3.89    1.72
   6   6   2    1.26    1.57
   7  -6   2    0.77    1.36
  -7  -6  -2    1.29    1.55
   7   6   2    0.35    1.66
  -7   6  -2   -0.14    1.80
  -8  -6  -2   61.51    3.83
   8  -6   2   56.82    3.70
   8   6   2   59.73    4.21
  -8   6  -2   65.39    4.27
   9  -6   2    8.69    1.98
  -9  -6  -2    8.42    2.11
  -9   6  -2    8.96    2.39
   9   6   2   10.35    2.39
 -10  -6  -2    3.25    1.99
  10  -6   2    1.94    1.86
 -10   6  -2    5.44    2.42
  10   6   2    6.11    2.45
 -11  -6  -2    1.24    1.91
  11  -6   2    1.28    1.83
  11   6   2   -0.26    2.36
 -11   6  -2    0.93    2.44
  12  -6   2   -1.81    1.82
 -12   6  -2   -0.13    2.72
  12   6   2    5.36    2.67
  13  -6   2   24.83    3.06
  13   6   2   15.34    3.45
 -13   6  -2   23.04    3.77
  14   6   2    0.77    2.86
 -14   6  -2    2.14    3.08
  15   6   2    7.28    3.35
 -15   6  -2    2.69    3.29
 -16   6  -2    2.76    3.47
  16   6   2   -2.81    3.22
  18   7  -2   15.22    4.34
 -18   7   2    5.22    3.75
  17   7  -2    4.66    3.58
 -17   7   2    5.37    3.43
  16   7  -2   15.93    3.72
 -16   7   2   11.23    3.44
  15   7  -2   -0.44    2.86
 -15   7   2   -1.61    2.83
  14   7  -2    0.01    2.53
 -14   7   2    2.37    2.67
  13   7  -2    9.83    2.80
 -13   7   2   -0.30    2.58
  12  -7  -2   15.08    2.29
 -12   7   2   17.98    3.02
  12   7  -2   10.49    2.75
 -11  -7   2    4.97    1.91
  11  -7  -2    8.12    1.90
 -11   7   2    3.99    2.40
  11   7  -2    4.80    2.32
 -10  -7   2  105.52    5.52
  10  -7  -2  110.38    5.54
  10   7  -2  118.86    6.16
 -10   7   2  108.18    6.14
   9  -7  -2   23.25    2.23
  -9  -7   2   20.71    2.27
   9   7  -2   20.01    2.66
  -9   7   2   22.46    2.79
   8  -7  -2   13.16    1.77
  -8  -7   2   13.44    1.83
  -8   7   2   13.61    2.29
   8   7  -2   13.01    2.19
   7  -7  -2    2.12    1.22
  -7  -7   2   -0.54    0.79
  -7   7   2    1.10    1.68
   7   7  -2   -0.91    1.55
   6  -7  -2   14.71    1.48
  -6  -7   2   17.61    1.57
  -6   7   2   26.23    2.27
   6   7  -2   25.25    2.17
   6   7  -2   26.62    2.13
   5  -7  -2    0.75    0.85
  -5   7   2    0.91    1.19
  -5   7   2   -1.02    1.29
   5   7  -2   -1.38    1.15
   5   7  -2    0.40    1.22
  -4  -7   2  120.75    6.73
   4   7  -2  121.68    5.52
  -4   7   2  132.63    5.58
   4   7  -2  123.78    5.56
  -4   7   2  126.86    5.64
  -3  -7   2   13.85    2.57
   3   7  -2   15.21    1.21
  -3   7   2   12.45    1.20
   3   7  -2   11.42    1.24
  -3   7   2   10.16    1.30
   2  -7  -2    7.15    2.49
  -2  -7   2    4.92    2.38
   1  -7  -2   17.57    2.78
  -1  -7   2   17.94    2.78
   0  -7  -2   33.49    3.33
   0   7  -2   36.63    1.83
   0   7  -2   31.47    1.79
  -1  -7  -2   -3.06    2.25
  -1   7  -2   -1.15    0.82
  -1   7  -2   -0.03    0.87
   2   7   2   19.42    1.69
  -2   7  -2   21.03    1.68
  -2   7  -2   19.00    1.63
   3   7   2    0.06    1.17
   3   7   2    2.35    1.16
  -3   7  -2   -1.10    1.19
  -3   7  -2    1.57    1.20
   4   7   2   24.54    2.11
   4   7   2   26.12    2.23
  -4   7  -2   23.87    2.14
   5  -7   2   11.34    1.42
   5   7   2   11.79    1.84
  -5   7  -2   12.02    1.89
  -6  -7  -2   32.77    2.44
   6  -7   2   35.19    2.48
   6   7   2   37.32    2.98
  -6   7  -2   37.91    3.06
   7  -7   2   17.48    1.96
  -7  -7  -2   22.39    2.16
  -7   7  -2   20.54    2.56
   7   7   2   18.70    2.44
   8  -7   2   28.57    2.51
  -8  -7  -2   26.05    2.56
   8   7   2   30.78    3.06
  -8   7  -2   27.48    2.99
  -9  -7  -2    1.09    1.56
   9  -7   2    1.93    1.60
  -9   7  -2    2.54    2.25
   9   7   2    4.22    2.18
  10  -7   2    2.82    1.68
 -10   7  -2    2.63    2.36
  10   7   2    1.25    2.30
  11  -7   2   -1.07    1.64
 -11   7  -2   -4.49    2.29
  11   7   2    1.25    2.51
  12   7   2    5.69    2.81
 -12   7  -2   -2.81    2.48
  13   7   2    2.11    2.82
 -13   7  -2    0.62    2.81
  14   7   2    8.56    3.34
 -14   7  -2   12.10    3.62
 -15   7  -2    0.26    3.16
  15   7   2    0.93    3.11
 -16   7  -2    9.82    3.88
  16   7   2   11.01    3.95
 -17   8   2   15.12    3.92
  17   8  -2   28.92    4.74
  16   8  -2    6.97    3.30
 -16   8   2   10.28    3.43
  15   8  -2    5.20    3.25
 -15   8   2    3.84    2.88
 -14   8   2    7.34    3.01
  14   8  -2    7.56    2.94
 -13   8   2   -6.78    2.47
  13   8  -2    1.54    2.58
 -12   8   2    4.40    2.61
  12   8  -2    3.87    2.41
 -11   8   2   -3.93    2.19
  11   8  -2    0.60    2.23
  10  -8  -2    9.64    1.73
 -10   8   2    6.62    2.44
  10   8  -2    6.70    2.31
   9  -8  -2   -1.34    1.26
  -9   8   2    0.15    1.96
   9   8  -2   -1.90    1.79
   8  -8  -2   55.52    3.14
   8   8  -2   49.05    3.73
  -8   8   2   57.17    3.88
   7  -8  -2   -0.77    0.71
  -7  -8   2   -0.18    1.00
   7   8  -2   -1.12    1.57
  -7   8   2    0.16    1.73
  -6   8   2    6.16    1.65
  -6   8   2    8.40    1.78
   6   8  -2    7.57    1.62
   6   8  -2    7.25    1.64
  -5   8   2    1.46    1.25
   5   8  -2    1.67    1.31
   5   8  -2   -0.84    1.20
  -5   8   2    2.74    1.48
  -4  -8   2    8.30    2.68
   4   8  -2   10.46    1.35
   4   8  -2    9.39    1.36
  -4   8   2    9.85    1.50
  -4   8   2    8.52    1.35
  -3  -8   2   36.95    3.47
  -3   8   2   30.79    2.12
  -3   8   2   32.88    2.06
   3   8  -2   31.68    2.06
   3   8  -2   37.98    2.03
   2  -8  -2   -1.92    2.41
  -2  -8   2    2.16    2.46
  -1  -8   2   31.07    3.27
   1  -8  -2   25.85    3.27
   0  -8  -2   74.94    5.16
  -1  -8  -2   22.29    3.11
  -1   8  -2   22.59    1.62
  -1   8  -2   20.70    1.59
  -2   8  -2   -0.61    1.09
   2   8   2    1.34    1.03
   2   8   2    0.75    0.97
  -2   8  -2   -0.60    1.11
   3   8   2   -0.57    1.11
   3   8   2    0.72    1.21
  -3   8  -2    1.99    1.28
  -3   8  -2   -0.39    1.27
   4  -8   2   -1.54    0.79
   4   8   2    1.18    1.35
   4   8   2   -0.89    1.27
  -4   8  -2    0.74    1.40
  -4   8  -2    0.94    1.44
   5   8   2   47.24    3.05
  -5   8  -2   41.49    3.18
   5   8   2   49.71    3.17
  -6  -8  -2   11.16    1.37
   6  -8   2    9.61    1.49
   6   8   2   13.11    2.05
  -6   8  -2   13.90    2.13
   7  -8   2    5.02    1.38
   7   8   2    9.22    2.11
  -7   8  -2    8.41    2.12
   8  -8   2    0.68    1.31
  -8   8  -2    3.37    2.15
   8   8   2   -0.26    2.01
  -9   8  -2    0.05    2.14
   9   8   2    0.11    2.14
  10   8   2    0.88    2.37
 -10   8  -2    3.41    2.37
  11   8   2    1.95    2.65
 -11   8  -2   -2.02    2.41
 -12   8  -2   13.22    3.22
  12   8   2    8.54    3.09
 -13   8  -2    3.53    2.98
  13   8   2   -0.35    2.68
  14   8   2    0.23    3.02
 -14   8  -2    4.26    3.18
  15   8   2    1.19    3.17
 -15   8  -2   -1.47    3.20
  16   8   2    0.70    3.42
 -17   9   2    8.16    3.72
  17   9  -2   13.99    4.17
  16   9  -2   -3.59    3.03
 -16   9   2    1.08    3.21
  15   9  -2    2.67    3.19
 -15   9   2   -1.81    2.87
  14   9  -2    5.07    3.11
 -14   9   2    6.31    3.08
 -13   9   2    3.08    2.85
  13   9  -2   -0.85    2.54
  12   9  -2    1.22    2.41
 -12   9   2   -1.06    2.55
  11   9  -2   -0.03    2.23
 -11   9   2    3.67    2.42
 -10   9   2    2.28    2.24
  10   9  -2    1.41    2.11
   9   9  -2   -2.12    1.87
  -9   9   2    1.32    2.11
   8   9  -2   -0.54    1.83
  -8   9   2   -2.39    1.90
  -7   9   2    1.46    1.88
   7   9  -2    2.69    1.70
   6   9  -2    3.76    1.62
  -6   9   2    6.89    1.81
  -6   9   2    4.58    1.61
   6   9  -2    3.57    1.53
   5   9  -2   78.69    3.95
   5   9  -2   72.07    3.90
  -5   9   2   81.09    3.98
  -5   9   2   76.07    4.05
  -4  -9   2    4.34    2.81
   4   9  -2    3.03    1.21
   4   9  -2    4.76    1.29
  -4   9   2    3.80    1.23
  -4   9   2    4.08    1.37
  -3  -9   2    9.27    2.90
   3  -9  -2   10.00    3.19
  -3   9   2    7.57    1.10
   3   9  -2    7.94    1.23
  -3   9   2    9.68    1.23
  -2  -9   2   -0.29    2.63
   2  -9  -2   -0.22    2.76
  -1  -9   2   -0.64    2.50
   1  -9  -2   -0.41    2.78
   0  -9  -2    3.33    2.80
  -1  -9  -2    8.99    2.96
  -1   9  -2    7.98    1.09
  -1   9  -2    8.98    1.09
   2   9   2   -0.35    1.05
  -2   9  -2   -0.73    1.14
  -2   9  -2    0.62    1.12
   3   9   2   39.61    2.58
   3   9   2   39.20    2.46
  -3   9  -2   38.75    2.72
  -3   9  -2   43.67    2.73
   4   9   2   29.21    2.46
  -4   9  -2   27.19    2.34
  -4   9  -2   29.91    2.61
   4   9   2   28.80    2.33
   5  -9   2    2.69    0.96
   5   9   2    3.77    1.74
  -5   9  -2    4.34    1.73
   5   9   2    3.60    1.59
   6   9   2    6.04    1.89
  -6   9  -2    4.98    1.96
   7   9   2    1.52    2.01
  -7   9  -2    1.84    1.99
  -8   9  -2   10.94    2.45
   8   9   2    9.29    2.48
  -9   9  -2    1.44    2.24
   9   9   2    3.49    2.29
  10   9   2    0.58    2.40
 -10   9  -2    0.40    2.47
  11   9   2    1.88    2.66
 -11   9  -2   -1.59    2.46
  12   9   2    0.82    2.82
 -12   9  -2    2.57    2.83
  13   9   2    2.12    2.94
 -13   9  -2    4.84    3.10
  14   9   2    2.03    3.17
 -14   9  -2    0.33    3.12
  15   9   2   17.26    4.10
 -15   9  -2   13.87    3.87
  16  10  -2    8.10    3.64
 -16  10   2   -0.89    3.14
  15  10  -2   -1.57    3.10
 -15  10   2   -0.92    3.09
 -14  10   2   10.94    3.21
  14  10  -2    9.31    3.29
  13  10  -2    5.99    2.96
 -13  10   2    4.99    2.94
 -12  10   2   -0.81    2.62
  12  10  -2   -2.55    2.48
 -11  10   2    3.21    2.55
  11  10  -2    7.51    2.60
 -10  10   2    7.13    2.51
  10  10  -2    8.98    2.54
  -9  10   2   -0.58    2.15
   9  10  -2    1.31    2.07
  -8  10   2   14.78    2.41
   8  10  -2   10.49    2.28
  -7  10   2    0.01    1.89
   7  10  -2   -2.94    1.73
   6  10  -2   11.15    1.95
  -6  10   2   11.31    1.99
  -5  10   2   -0.06    1.36
  -5  10   2   -0.68    1.51
   5  10  -2    2.04    1.30
   5  10  -2   -1.01    1.41
  -4 -10   2    1.95    2.75
   4  10  -2    1.80    1.28
  -4  10   2    0.99    1.35
  -4  10   2    1.59    1.21
   4  10  -2    1.03    1.15
  -3 -10   2   13.28    3.25
   3 -10  -2    9.15    3.29
  -2 -10   2    9.49    3.15
   2 -10  -2    3.34    3.06
   1 -10  -2    1.28    2.99
  -1 -10   2    1.10    2.85
   0 -10  -2   22.95    3.59
   0 -10   2   25.33    3.77
  -1 -10  -2   62.41    5.34
  -1  10  -2   70.75    3.29
  -1  10  -2   69.26    3.30
  -2 -10  -2    5.84    2.86
  -2  10  -2    0.53    1.16
  -2  10  -2    3.75    1.27
  -3  10  -2    6.41    1.58
   3  10   2    5.98    1.32
  -3  10  -2   10.71    1.66
   3  10   2    5.81    1.49
   4  10   2   10.24    1.82
  -4  10  -2   12.48    1.86
   4  10   2   13.72    1.62
   5  10   2    3.22    1.78
  -5  10  -2    3.10    1.79
  -6  10  -2   22.95    2.63
   6  10   2   23.74    2.60
   7  10   2    0.97    2.10
  -7  10  -2    2.21    1.99
  -8  10  -2    0.11    2.01
   8  10   2   -0.80    2.10
  -9  10  -2   10.66    2.61
   9  10   2   12.72    2.83
 -10  10  -2    7.07    2.63
  10  10   2   -3.10    2.50
 -11  10  -2    5.74    2.81
  11  10   2    3.66    2.86
  12  10   2   13.66    3.39
 -12  10  -2    8.76    3.20
 -13  10  -2   -1.07    2.93
  13  10   2    3.56    3.09
 -14  10  -2   -0.18    3.18
  14  10   2   -1.37    3.18
  16  11  -2    0.33    3.45
 -15  11   2    6.15    3.24
  15  11  -2    6.17    3.41
 -14  11   2    7.81    3.20
  14  11  -2    9.54    3.45
 -13  11   2    2.26    2.80
  13  11  -2    5.56    3.07
 -12  11   2    0.84    2.74
  12  11  -2    3.95    2.80
  11  11  -2   -0.21    2.51
 -11  11   2   -0.33    2.53
 -10  11   2    4.85    2.49
  10  11  -2    1.81    2.44
  -9  11   2    6.64    2.38
   9  11  -2   10.27    2.46
   8  11  -2   18.77    2.70
  -8  11   2   23.34    2.73
   7  11  -2    1.36    1.91
  -7  11   2   -0.03    1.90
   6  11  -2    2.09    1.74
  -6  11   2    0.51    1.76
  -5  11   2   20.65    2.17
   5  11  -2   18.96    2.06
   4 -11  -2   59.67    5.70
  -4 -11   2   66.38    5.65
  -4  11   2   67.70    3.40
  -4  11   2   66.77    3.47
   4  11  -2   62.46    3.40
   4  11  -2   61.08    3.33
  -3 -11   2   -3.29    3.02
   3 -11  -2   -3.41    3.04
  -2 -11   2   55.41    5.32
   2 -11  -2   55.71    5.33
   1 -11  -2   22.14    3.89
  -1 -11   2   20.13    3.85
   0 -11   2    1.16    3.06
   0 -11  -2   -1.22    3.08
  -1 -11  -2    8.52    3.26
  -1  11  -2    4.74    1.07
  -2 -11  -2   18.26    3.63
  -2  11  -2   24.17    2.01
  -2  11  -2   25.55    2.09
   3  11   2   31.49    2.43
  -3  11  -2   32.72    2.52
   4  11   2    1.41    1.64
  -4  11  -2    0.71    1.64
   5  11   2   -0.88    1.67
  -5  11  -2    1.24    1.73
   6  11   2    2.00    2.00
  -6  11  -2    0.58    1.95
  -7  11  -2    8.74    2.32
   7  11   2    7.28    2.30
   8  11   2   20.21    2.93
  -8  11  -2   19.16    2.74
  -9  11  -2   -3.12    2.24
   9  11   2   -4.53    2.46
 -10  11  -2    8.38    2.78
  10  11   2   12.76    3.16
 -11  11  -2   13.05    3.23
  11  11   2   14.90    3.42
  12  11   2    4.00    3.07
 -12  11  -2    6.36    3.07
 -13  11  -2   -1.01    2.98
  13  11   2   -2.99    3.00
  14  11   2   -1.66    3.26
 -14  11  -2    2.03    3.17
 -15  12   2    0.07    3.09
  15  12  -2   -0.23    3.40
 -14  12   2   -1.16    2.71
  14  12  -2    5.30    3.33
 -13  12   2   -0.63    2.78
  13  12  -2    4.03    3.16
  12  12  -2    1.01    2.89
 -12  12   2   -4.34    2.60
 -11  12   2    1.62    2.65
  11  12  -2   -1.66    2.62
  10  12  -2    1.06    2.56
 -10  12   2    0.88    2.51
   9  12  -2    7.90    2.54
  -9  12   2    6.26    2.44
  -8  12   2    1.60    2.15
   8  12  -2    2.07    2.13
  -7  12   2   -2.49    1.85
   7  12  -2   -2.61    1.85
   6  12  -2    7.06    1.92
  -6  12   2    5.34    1.91
   5  12  -2    4.43    1.65
  -5  12   2    1.37    1.65
   4 -12  -2   -2.13    3.43
  -4 -12   2    0.31    3.26
  -4  12   2    1.47    1.44
   4  12  -2   -0.25    1.38
   3 -12  -2   -4.27    3.36
  -3 -12   2    2.92    3.42
   2 -12  -2   -0.09    3.36
  -2 -12   2    3.90    3.42
   1 -12  -2   40.37    4.76
  -1 -12   2   44.21    4.88
   0 -12  -2    6.92    3.61
   0 -12   2    0.89    3.33
   1 -12   2   14.34    4.00
  -1 -12  -2   12.63    3.80
  -2 -12  -2    8.43    3.37
  -2  12  -2    7.44    1.46
   3  12   2    1.49    1.52
  -3  12  -2    0.67    1.54
  -4  12  -2    1.61    1.68
   4  12   2    1.42    1.69
  -5  12  -2    1.14    1.88
   5  12   2    0.26    1.86
   6  12   2    3.03    2.13
  -6  12  -2    0.20    1.93
   7  12   2    2.38    2.29
  -7  12  -2    2.73    2.22
  -8  12  -2   -2.42    2.16
   8  12   2   -1.08    2.51
   9  12   2    7.89    2.92
  -9  12  -2    5.18    2.55
  10  12   2    1.49    2.83
 -10  12  -2    1.28    2.57
 -11  12  -2   -0.85    2.71
  11  12   2    1.01    2.92
  12  12   2    1.79    3.08
 -12  12  -2   -0.30    2.97
  13  12   2   -1.20    3.17
 -13  12  -2    5.37    3.31
  14  13  -2   -0.99    3.32
 -14  13   2    0.23    3.13
 -13  13   2    0.93    2.95
  13  13  -2    1.69    3.24
 -12  13   2    2.44    2.79
  12  13  -2    3.71    3.03
 -11  13   2   -0.08    2.64
  11  13  -2    1.24    2.75
 -10  13   2    0.67    2.48
  10  13  -2    2.94    2.68
   9  13  -2    4.27    2.51
  -9  13   2   -2.14    2.34
  -8  13   2    2.68    2.22
   8  13  -2   -0.82    2.15
   7  13  -2   13.39    2.44
  -7  13   2   12.35    2.33
   6  13  -2    0.13    1.87
  -6  13   2   -0.56    1.81
   5 -13  -2    2.97    3.96
  -5  13   2    1.94    1.68
   5  13  -2   -0.47    1.56
   4 -13  -2    1.03    3.66
  -4 -13   2    0.76    3.44
  -4  13   2    3.54    1.47
   3 -13  -2   25.50    4.65
  -3 -13   2   23.84    4.53
   2 -13  -2   -2.87    3.42
  -2 -13   2   -0.53    3.56
   1 -13  -2   -4.66    3.36
  -1 -13   2    1.81    3.66
   0 -13  -2   -1.09    3.48
   0 -13   2    5.11    3.75
  -1 -13  -2    3.19    3.53
   1 -13   2    0.68    3.57
  -2  13  -2   10.62    1.50
  -3  13  -2    7.85    1.68
   4  13   2    7.04    1.87
  -4  13  -2    4.92    1.82
   5  13   2    2.31    1.99
  -5  13  -2    4.73    1.96
   6  13   2    8.70    2.36
  -6  13  -2    5.91    2.17
   7  13   2    3.74    2.51
  -7  13  -2    5.07    2.31
  -8  13  -2    0.57    2.40
   8  13   2   -0.79    2.60
  -9  13  -2   -0.16    2.52
   9  13   2   -0.66    2.78
  10  13   2    5.85    3.07
 -10  13  -2    2.85    2.79
 -11  13  -2   -0.84    2.95
  11  13   2    2.45    3.18
 -12  13  -2   -0.06    2.95
  12  13   2    3.69    3.45
  13  14  -2   14.75    3.84
 -13  14   2   15.45    3.49
  12  14  -2    2.09    3.28
 -12  14   2    1.48    2.81
  11  14  -2   37.89    4.16
 -11  14   2   24.05    3.54
 -10  14   2   -3.11    2.35
  10  14  -2   -2.11    2.69
   9  14  -2   -0.05    2.53
  -9  14   2    2.17    2.45
  -8  14   2   20.01    2.88
   8  14  -2   30.34    3.15
   7  14  -2    4.30    2.29
  -7  14   2    8.00    2.28
   6 -14  -2   14.95    4.65
   6  14  -2   10.82    2.22
  -6  14   2   14.34    2.19
   5 -14  -2    7.52    4.16
  -5  14   2    1.86    1.69
   4 -14  -2    3.73    4.10
  -4 -14   2    4.97    3.91
   3 -14  -2   36.63    5.29
  -3 -14   2   39.90    5.28
   2 -14  -2    4.73    4.06
  -2 -14   2    8.03    4.06
  -1 -14   2    0.34    3.84
   1 -14  -2    1.74    3.97
   0 -14   2    1.10    4.04
   0 -14  -2    2.73    3.98
   1 -14   2    8.23    4.14
  -1 -14  -2    2.41    3.79
   2 -14   2    4.43    4.05
  -3  14  -2    1.30    1.53
   4  14   2   11.28    1.99
  -4  14  -2    7.09    1.96
  -5  14  -2    0.08    1.93
   5  14   2    1.34    2.03
   6  14   2    9.57    2.48
  -6  14  -2    5.80    2.24
   7  14   2   -0.05    2.60
  -7  14  -2   -2.75    2.18
  -8  14  -2    3.82    2.53
   8  14   2    7.13    2.98
   9  14   2   24.54    3.63
  -9  14  -2   20.54    3.27
 -10  14  -2    1.42    2.94
  10  14   2    2.71    3.12
 -11  14  -2    5.12    3.18
  11  14   2    3.50    3.40
 -12  15   2    2.04    2.92
  12  15  -2   -0.99    3.22
 -11  15   2   -0.01    2.71
  11  15  -2    2.17    3.12
  10  15  -2   16.63    3.31
 -10  15   2    6.91    2.81
  -9  15   2    1.78    2.48
   9  15  -2    2.68    2.75
  -8  15   2   -0.53    2.25
   8  15  -2   -3.41    2.35
   7 -15  -2    4.46    4.60
   7  15  -2    1.44    2.20
  -7  15   2   -2.51    2.01
   6 -15  -2    1.72    4.44
  -6  15   2    2.38    1.93
   6  15  -2   -0.14    1.99
   5 -15  -2   -6.50    4.26
  -5  15   2    0.53    1.69
  -4 -15   2   20.67    4.72
   4 -15  -2   16.50    4.96
  -3 -15   2    0.95    4.05
   3 -15  -2   -5.73    4.15
  -2 -15   2    7.48    4.47
   2 -15  -2   15.14    4.74
  -1 -15   2    5.78    4.28
   1 -15  -2    8.20    4.51
   0 -15  -2    6.64    4.23
   0 -15   2    8.10    4.39
  -1 -15  -2    2.74    4.18
   1 -15   2    4.72    4.39
   2 -15   2   31.58    5.42
   3 -15   2    0.83    4.44
  -3  15  -2    1.66    1.64
  -4  15  -2    0.74    1.78
   5  15   2    7.94    2.33
  -5  15  -2    7.75    2.14
   6  15   2   -1.77    2.29
  -6  15  -2   -0.02    2.13
  -7  15  -2   -0.25    2.36
   7  15   2    2.20    2.58
  -8  15  -2    0.05    2.59
   8  15   2    1.99    2.79
   9  15   2   -0.67    3.06
  -9  15  -2   -0.30    2.79
  10  15   2    8.48    3.30
 -10  15  -2    5.27    3.05
 -10  16   2   -0.20    2.56
  10  16  -2   -0.46    2.93
  -9  16   2   -0.80    2.37
   9  16  -2   -2.00    2.72
   8 -16  -2    7.17    5.13
  -8  16   2    8.63    2.48
   8  16  -2    9.92    2.79
   7 -16  -2    4.93    4.81
   7  16  -2   -1.07    2.31
  -7  16   2    1.33    2.10
   6 -16  -2   21.04    5.46
  -6  16   2   11.56    2.25
   5 -16  -2   15.74    5.15
   4 -16  -2   -0.59    4.40
  -4 -16   2    1.34    4.26
  -3 -16   2   -8.85    4.14
   3 -16  -2   -1.91    4.48
  -2 -16   2    3.90    4.72
   2 -16  -2    9.05    4.79
   1 -16  -2   -5.44    4.50
  -1 -16   2    2.78    4.52
   0 -16   2    3.43    4.64
   0 -16  -2   -0.99    4.41
  -1 -16  -2   -1.95    4.34
   1 -16   2    1.20    4.63
   2 -16   2    3.11    4.59
   3 -16   2    6.82    4.78
   4 -16   2   14.05    5.00
  -4  16  -2    6.41    1.95
  -5  16  -2    4.55    2.10
   6  16   2    4.57    2.45
  -6  16  -2    4.22    2.34
  -7  16  -2   -1.64    2.33
   7  16   2    4.09    2.68
   8  16   2    3.00    3.01
  -8  16  -2    5.17    2.73
   8 -17  -2    8.91    5.46
  -8  17   2   10.94    2.62
   8  17  -2   12.06    2.90
   7 -17  -2   -0.54    4.88
  -7  17   2    2.59    2.19
   6 -17  -2    1.81    4.98
  -6  17   2   -1.15    1.90
   5 -17  -2    9.22    5.15
   4 -17  -2    3.23    5.12
  -3 -17   2   -3.70    4.56
   3 -17  -2    0.18    5.00
   2 -17  -2    4.94    5.03
  -2 -17   2    4.14    4.92
  -1 -17   2    2.54    4.91
   1 -17  -2    1.14    4.88
   0 -17   2    5.10    4.89
   0 -17  -2    1.54    4.78
   1 -17   2   -7.60    4.63
  -1 -17  -2   -2.72    4.49
   2 -17   2    5.33    5.47
   3 -17   2    6.12    5.05
   4 -17   2    1.27    4.93
  -4  17  -2   -0.53    1.82
   5 -17   2    1.54    5.14
  -5  17  -2   -0.32    2.05
   6  17   2   17.82    2.90
  -6  17  -2   11.25    2.66
  -7  17  -2    1.50    2.43
   6 -18  -2    5.54    5.48
   5 -18  -2    3.75    5.36
   4 -18  -2   -3.31    5.16
   3 -18  -2    5.40    5.36
  -3 -18   2    3.49    5.12
  -2 -18   2    2.69    5.33
   2 -18  -2    9.88    5.48
  -1 -18   2   -4.82    5.09
   1 -18  -2    2.84    5.16
   0 -18  -2    2.58    5.06
   0 -18   2    3.24    5.37
   1 -18   2   11.50    5.67
   2 -18   2   -6.70    5.03
   3 -18   2    6.94    5.63
   4 -18   2    8.69    5.44
  19   0  -3   -6.96    3.12
 -19   0   3    0.39    3.47
 -18   0   3    5.08    3.50
  18   0  -3    1.82    3.23
 -17   0   3    2.80    3.27
  17   0  -3   -3.88    2.67
 -16   0   3   -2.01    2.91
  16   0  -3   -0.92    2.70
 -15   0   3   -2.41    2.70
  15   0  -3   -0.24    2.57
  14   0  -3    1.36    2.43
 -14   0   3   -0.33    2.49
  13   0  -3   -2.38    2.14
 -13   0   3   -1.83    2.41
  12   0  -3   -0.45    1.99
 -12   0   3   -0.96    2.14
 -11   0   3    1.38    2.09
  11   0  -3   -0.52    1.92
 -10   0   3   -0.44    1.84
  10   0  -3   -0.05    1.66
  -9   0   3   -0.28    1.78
   9   0  -3    1.44    1.62
   8   0  -3    0.14    1.54
  -8   0   3   -0.34    1.64
  -7   0   3   -0.17    1.58
   7   0  -3    1.20    1.47
  -6   0   3    1.00    1.52
   6   0  -3    2.72    1.45
   5   0  -3   -0.58    1.26
  -5   0   3    1.89    1.41
   4   0  -3    0.78    1.18
  -4   0   3    1.00    1.23
   3   0  -3   -0.03    0.95
  -3   0   3   -0.26    0.98
  -2   0   3   -1.29    0.71
  -2   0   3    0.23    0.79
   2   0  -3    0.36    0.83
  -1   0   3    0.16    0.76
   1   0  -3   -0.43    0.67
   1   0  -3   -0.35    0.77
  -1   0   3   -0.32    0.69
   0   0  -3   -2.07    0.87
   0   0   3   -0.95    0.86
   1   0   3   -0.16    0.99
  -1   0  -3   -0.85    1.09
  -2   0  -3   -0.65    1.26
   2   0   3    0.20    1.14
   3   0   3    1.63    1.32
  -3   0  -3   -0.42    1.40
   4   0   3    0.44    1.31
  -4   0  -3   -4.35    1.42
   5   0   3    1.66    1.44
  -5   0  -3    2.05    1.62
  -6   0  -3   -2.88    1.57
   6   0   3   -0.40    1.41
  -7   0  -3   -0.59    1.82
   7   0   3    2.06    1.59
  -8   0  -3   -0.05    1.96
   8   0   3   -0.97    1.72
  -9   0  -3   -1.63    2.22
   9   0   3   -3.09    1.82
  10   0   3   -2.09    2.00
 -10   0  -3   -2.15    2.27
 -11   0  -3    1.27    2.56
  11   0   3    0.74    2.39
  12   0   3    1.67    2.50
 -12   0  -3    0.36    2.71
  13   0   3   -1.16    2.61
 -13   0  -3   -2.90    2.89
  14   0   3    3.12    2.83
 -14   0  -3   -1.93    3.02
 -15   0  -3    0.71    3.30
  15   0   3    3.00    3.11
  16   0   3   -0.27    3.21
 -16   0  -3    3.50    3.51
  17   0   3   -4.03    3.26
 -17   0  -3    1.25    3.51
 -19  -1   3    7.77    3.56
  19  -1  -3   10.76    3.90
 -19   1   3    7.99    3.94
  19   1  -3   15.24    4.14
 -18  -1   3    6.50    3.45
  18  -1  -3   11.13    3.48
 -18   1   3    6.91    3.57
  18   1  -3    8.28    3.64
  17  -1  -3   17.74    3.60
 -17  -1   3   16.09    3.79
 -17   1   3    6.71    3.54
  17   1  -3   13.00    3.54
  16  -1  -3   14.34    3.43
 -16  -1   3    5.92    3.24
 -16   1   3    8.50    3.32
  16   1  -3   10.52    3.32
  15  -1  -3   11.30    2.95
 -15  -1   3    7.66    2.89
 -15   1   3    9.05    3.12
  15   1  -3    6.08    2.87
 -14  -1   3    1.20    2.57
  14  -1  -3    2.33    2.53
  14   1  -3    1.32    2.52
 -14   1   3    2.67    2.61
  13  -1  -3    0.32    2.29
 -13  -1   3    3.26    2.61
  13   1  -3    3.88    2.41
 -13   1   3   -1.91    2.33
 -12  -1   3   95.77    5.74
  12  -1  -3  100.85    5.64
 -12   1   3   93.62    5.73
  12   1  -3  100.63    5.79
  11  -1  -3    4.16    1.97
 -11  -1   3   -0.23    2.10
  11   1  -3    3.96    2.05
 -11   1   3    0.20    2.13
 -10  -1   3   72.04    4.50
  10  -1  -3   75.00    4.44
  10   1  -3   72.16    4.45
 -10   1   3   71.66    4.50
   9  -1  -3   63.56    3.79
  -9  -1   3   60.86    3.84
  -9   1   3   54.15    3.81
   9   1  -3   52.64    3.72
   8  -1  -3   42.89    3.20
  -8  -1   3   47.35    3.41
  -8   1   3   50.20    3.35
   8   1  -3   53.17    3.38
   7  -1  -3   35.60    2.91
  -7  -1   3   39.47    2.97
  -7   1   3   42.54    2.95
   7   1  -3   39.68    2.92
  -6  -1   3   69.57    3.86
   6  -1  -3   72.67    3.83
  -6   1   3   73.15    3.90
   6   1  -3   63.55    3.73
   5  -1  -3    7.91    1.51
  -5  -1   3    6.21    1.53
   5   1  -3    7.82    1.47
  -5   1   3    5.57    1.50
   4  -1  -3   24.90    2.17
  -4  -1   3   24.38    2.18
  -4   1   3   26.31    1.95
   4   1  -3   23.81    2.14
  -3  -1   3  148.89    6.28
   3  -1  -3  147.67    6.28
   3   1  -3  143.12    6.25
  -3   1   3  148.83    6.27
  -3   1   3  148.66    6.27
   3   1  -3  136.64    6.22
  -2  -1   3  153.25    6.53
   2  -1  -3  150.15    6.53
  -2   1   3  152.73    6.88
  -2   1   3  161.44    6.54
   2   1  -3  152.44    6.52
   2   1  -3  164.65    6.54
  -2   1   3  150.76    6.51
  -1  -1   3   23.41    1.74
   1  -1  -3   24.10    1.71
   1   1  -3   26.36    1.65
  -1   1   3   19.13    1.61
   1   1  -3   23.87    1.66
  -1   1   3   27.20    1.64
   0  -1  -3  930.99   37.80
   0  -1   3  928.54   37.78
   0   1  -3  953.29   37.80
   0   1   3  969.04   37.82
   0   1  -3  973.23   37.83
   0   1   3  911.00   37.79
  -1  -1  -3  354.97   14.97
   1  -1   3  365.49   14.96
  -1   1  -3  379.92   14.99
  -2  -1  -3   30.45    2.34
   2  -1   3   36.30    2.29
   2   1   3   32.95    2.33
  -2   1  -3   30.27    2.37
   3  -1   3   18.50    1.76
  -3  -1  -3   16.74    1.88
   3   1   3   18.59    1.80
  -3   1  -3   17.01    1.88
   4  -1   3   11.44    1.66
  -4  -1  -3    9.11    1.69
   4   1   3   11.00    1.66
  -4   1  -3   10.16    1.81
  -5  -1  -3    3.55    1.68
   5  -1   3    5.20    1.50
  -5   1  -3    6.26    1.67
   5   1   3    5.52    1.56
  -6  -1  -3    5.01    1.91
   6  -1   3    4.08    1.65
   6   1   3    5.41    1.63
  -6   1  -3    3.58    1.86
   7  -1   3    8.48    1.92
  -7  -1  -3    8.47    2.10
   7   1   3    8.33    1.92
  -7   1  -3    8.44    2.07
   8  -1   3   71.46    4.32
  -8  -1  -3   65.11    4.44
  -8   1  -3   66.99    4.47
   8   1   3   68.63    4.37
  -9  -1  -3    5.17    2.33
   9  -1   3    2.82    2.04
  -9   1  -3    0.29    2.18
   9   1   3    0.35    1.97
 -10  -1  -3   14.44    2.92
  10  -1   3   17.79    2.84
 -10   1  -3   18.62    3.02
  10   1   3   17.69    2.84
  11  -1   3    0.85    2.32
 -11  -1  -3    1.66    2.51
  11   1   3    5.99    2.54
 -11   1  -3   -0.73    2.51
  12  -1   3    8.17    2.80
 -12  -1  -3    6.59    2.93
  12   1   3    8.51    2.88
 -12   1  -3    8.06    2.99
 -13  -1  -3    6.14    3.04
  13  -1   3    7.54    2.88
 -13   1  -3   -0.27    2.95
  13   1   3    2.11    2.57
 -14  -1  -3    6.90    3.33
  14  -1   3    7.52    3.08
 -14   1  -3    6.57    3.34
  14   1   3    6.78    3.12
 -15  -1  -3    0.95    3.26
  15  -1   3    0.16    2.97
 -15   1  -3    2.88    3.31
  15   1   3    4.62    3.14
 -16  -1  -3    7.58    3.65
  16  -1   3    2.07    3.38
  16   1   3    7.93    3.55
 -16   1  -3    7.04    3.70
  17  -1   3   -0.90    3.35
 -17  -1  -3   -2.17    3.27
 -17   1  -3    2.26    3.76
  17   1   3    6.52    3.66
 -19  -2   3    5.02    3.28
  19  -2  -3    0.64    3.21
 -19   2   3    2.34    3.49
  19   2  -3   -2.70    3.39
 -18  -2   3   10.86    3.46
  18  -2  -3   12.30    3.71
 -18   2   3    3.31    3.59
  18   2  -3   14.62    4.00
  17  -2  -3    6.68    3.13
 -17  -2   3    2.76    3.00
  17   2  -3    4.82    3.29
 -17   2   3   -1.48    3.10
  16  -2  -3   22.36    3.61
 -16  -2   3   21.22    3.67
  16   2  -3   17.17    3.71
 -16   2   3   21.74    3.82
 -15  -2   3   38.97    4.21
  15  -2  -3   46.81    4.46
  15   2  -3   37.87    4.34
 -15   2   3   32.09    4.07
 -14  -2   3   -3.87    2.36
  14  -2  -3    1.30    2.40
  14   2  -3   -0.56    2.45
 -14   2   3    5.40    2.64
  13  -2  -3   40.30    3.76
 -13  -2   3   39.07    3.89
  13   2  -3   32.03    3.71
 -13   2   3   28.56    3.63
 -12  -2   3    9.35    2.49
  12  -2  -3    9.06    2.36
 -12   2   3    7.24    2.55
  12   2  -3    8.03    2.44
 -11  -2   3    8.53    2.44
  11  -2  -3   11.73    2.28
 -11   2   3   10.54    2.43
  11   2  -3   14.24    2.48
 -10  -2   3   37.06    3.33
  10  -2  -3   39.77    3.30
  10   2  -3   38.40    3.35
 -10   2   3   38.89    3.45
  -9  -2   3    0.64    1.72
   9  -2  -3    0.74    1.62
   9   2  -3   -0.87    1.58
  -9   2   3    2.12    1.84
  -8  -2   3   57.21    3.55
   8  -2  -3   50.55    3.46
  -8   2   3   55.94    3.64
   8   2  -3   55.54    3.54
   7  -2  -3   37.40    2.75
  -7  -2   3   37.69    2.85
  -7   2   3   34.06    2.87
   7   2  -3   32.78    2.78
  -6  -2   3   40.13    2.75
   6  -2  -3   37.79    2.71
  -6   2   3   36.93    2.81
   6   2  -3   36.09    2.74
   5  -2  -3   25.11    2.21
  -5  -2   3   25.07    2.05
   5   2  -3   20.51    1.95
  -5   2   3   23.41    2.08
   4  -2  -3   87.14    4.16
  -4  -2   3   87.76    4.18
   4   2  -3   84.25    4.15
  -4   2   3   88.18    4.19
  -3  -2   3  142.77    6.16
  -3  -2   3  139.17    6.49
   3  -2  -3  144.27    6.15
   3   2  -3  139.40    6.13
  -3   2   3  143.10    6.16
  -3   2   3  141.94    6.16
   3   2  -3  148.14    6.19
   2  -2  -3   80.85    3.78
  -2  -2   3   80.66    3.78
   2  -2  -3   85.66    4.14
  -2   2   3   80.00    3.76
  -2   2   3   85.33    3.76
   2   2  -3   82.69    3.78
   2   2  -3   84.51    3.82
  -1  -2   3   26.22    1.78
   1  -2  -3   26.09    1.79
   1   2  -3   26.71    1.82
  -1   2   3   22.86    1.79
  -1   2   3   26.80    1.77
   1   2  -3   26.86    1.86
   0  -2  -3  116.29    5.26
   0  -2   3  122.20    5.26
   0   2  -3  126.78    5.30
   0   2  -3  126.19    5.30
   0   2   3  117.16    5.25
   0   2   3  119.63    5.28
  -1  -2  -3   44.80    2.58
   1  -2   3   45.10    2.46
   1   2   3   38.53    2.45
  -1   2  -3   42.20    2.57
   1   2   3   41.13    2.60
   2  -2   3   15.85    1.58
  -2  -2  -3   16.72    1.68
  -2   2  -3   14.59    1.69
   2   2   3   14.79    1.55
  -3  -2  -3   23.00    2.01
   3  -2   3   25.57    2.00
  -3   2  -3   24.35    2.12
   3   2   3   23.69    2.03
  -4  -2  -3   94.53    4.80
   4  -2   3   96.69    4.72
   4   2   3   90.68    4.74
  -4   2  -3  104.19    4.88
  -5  -2  -3    2.62    1.66
   5  -2   3    2.96    1.40
  -5   2  -3   -0.22    1.57
   5   2   3    0.23    1.42
   6  -2   3    5.92    1.66
  -6  -2  -3    8.53    1.95
  -6   2  -3    8.85    1.98
   6   2   3    5.40    1.76
  -7  -2  -3    0.96    1.88
   7  -2   3    2.42    1.60
  -7   2  -3    1.21    1.84
   7   2   3    0.62    1.56
   8  -2   3    4.27    1.86
  -8  -2  -3   -0.68    1.94
   8   2   3    1.26    1.79
  -8   2  -3    1.36    2.05
  -9  -2  -3    8.45    2.45
   9  -2   3   14.40    2.43
   9   2   3   10.04    2.38
  -9   2  -3    9.14    2.49
  10  -2   3   10.90    2.62
 -10  -2  -3   11.69    2.79
 -10   2  -3   10.42    2.75
  10   2   3   13.47    2.55
  11  -2   3   12.47    2.73
 -11  -2  -3   12.70    2.97
 -11   2  -3   11.71    2.98
  11   2   3   14.03    2.98
 -12  -2  -3   15.12    3.28
  12  -2   3   15.67    3.10
  12   2   3   11.11    3.11
 -12   2  -3   13.41    3.34
 -13  -2  -3   -0.25    2.86
  13  -2   3    2.05    2.57
  13   2   3    2.00    2.79
 -13   2  -3    2.44    2.99
 -14  -2  -3   15.73    3.52
  14  -2   3   18.55    3.55
  14   2   3   24.26    3.85
 -14   2  -3   20.35    3.93
 -15  -2  -3   11.40    3.67
  15  -2   3   15.24    3.61
  15   2   3   21.71    4.00
 -15   2  -3   17.48    4.00
 -16  -2  -3    6.04    3.36
  16  -2   3    0.83    3.22
  16   2   3    4.51    3.35
 -16   2  -3   -1.87    3.40
  17  -2   3    2.57    3.36
  17   2   3    2.68    3.73
 -17   2  -3    1.81    3.78
  19  -3  -3    1.90    3.34
 -19   3   3   -2.93    3.51
  19   3  -3    2.69    3.69
  18  -3  -3   12.78    3.67
 -18  -3   3    7.43    3.25
  18   3  -3   14.72    3.84
 -18   3   3    7.15    3.71
 -17  -3   3   -5.56    2.59
  17  -3  -3   -2.26    2.70
 -17   3   3   -2.45    3.07
  17   3  -3   -0.12    3.17
  16  -3  -3    0.82    2.79
 -16  -3   3   -0.28    2.72
  16   3  -3    0.89    2.97
 -16   3   3    1.76    2.95
  15  -3  -3   16.95    3.26
 -15  -3   3   14.11    3.24
  15   3  -3   13.32    3.30
 -15   3   3   13.04    3.24
 -14  -3   3    4.14    2.47
  14  -3  -3    0.99    2.43
  14   3  -3   -0.25    2.46
 -14   3   3    1.66    2.62
  13  -3  -3   15.61    2.78
 -13  -3   3   13.31    2.90
  13   3  -3   14.78    2.85
 -13   3   3   11.74    2.92
 -12  -3   3   39.22    3.66
  12  -3  -3   43.25    3.67
  12   3  -3   40.17    3.81
 -12   3   3   33.64    3.75
  11  -3  -3    9.18    2.24
 -11  -3   3   11.23    2.44
  11   3  -3    9.28    2.31
 -11   3   3    8.33    2.42
 -10  -3   3   26.47    2.90
  10  -3  -3   30.06    2.90
  10   3  -3   23.07    2.81
 -10   3   3   28.57    2.99
   9  -3  -3    1.51    1.64
  -9  -3   3    4.35    1.83
   9   3  -3    0.11    1.62
  -9   3   3    2.59    1.85
  -8  -3   3   26.79    2.54
   8  -3  -3   32.94    2.57
   8   3  -3   28.46    2.57
  -8   3   3   28.75    2.67
   7  -3  -3   55.26    3.34
  -7  -3   3   51.51    3.34
   7   3  -3   50.58    3.33
  -7   3   3   58.70    3.49
  -6  -3   3   62.66    3.52
   6  -3  -3   59.86    3.43
  -6   3   3   65.83    3.62
   6   3  -3   61.67    3.56
   5  -3  -3    1.52    1.28
  -5  -3   3    0.87    1.31
   5   3  -3    0.91    1.28
  -5   3   3    3.79    1.41
   4  -3  -3   32.54    2.31
  -4  -3   3   32.62    2.27
   4   3  -3   31.80    2.28
   4   3  -3   30.67    2.33
  -4   3   3   31.17    2.40
  -4   3   3   29.91    2.24
  -3  -3   3   12.66    1.32
  -3  -3   3   12.73    1.71
   3  -3  -3   15.04    1.43
  -3   3   3   13.24    1.41
   3   3  -3   10.95    1.36
  -3   3   3   15.94    1.36
   3   3  -3   14.07    1.34
   2  -3  -3   19.19    2.04
  -2  -3   3   13.44    1.31
   2  -3  -3   17.50    1.37
   2   3  -3   17.48    1.44
  -2   3   3   16.29    1.38
   2   3  -3   18.62    1.39
  -2   3   3   21.64    1.45
  -1  -3   3   50.91    2.62
   1  -3  -3   55.86    3.51
   1  -3  -3   44.69    2.55
   1   3  -3   53.40    2.69
  -1   3   3   55.31    2.68
  -1   3   3   51.83    2.66
   1   3  -3   56.08    2.75
   0  -3   3  416.68   16.23
   0  -3  -3  382.99   16.19
   0   3  -3  427.84   16.30
   0   3   3  385.52   16.23
   0   3   3  378.88   16.23
   0   3  -3  413.04   16.27
  -1  -3  -3    2.44    1.11
   1  -3   3    1.45    1.04
   1   3   3    1.38    1.07
  -1   3  -3    1.19    1.19
  -1   3  -3    2.13    1.08
   1   3   3    1.81    1.08
   2  -3   3   30.96    2.11
  -2  -3  -3   27.54    2.15
  -2   3  -3   31.91    2.31
   2   3   3   29.39    2.19
   2   3   3   25.11    2.22
  -3  -3  -3   32.78    2.50
   3  -3   3   33.29    2.36
   3   3   3   31.14    2.48
  -3   3  -3   36.37    2.55
   4  -3   3    3.88    1.34
  -4  -3  -3    2.58    1.50
  -4   3  -3    2.72    1.52
   4   3   3    2.54    1.42
  -5  -3  -3   29.25    2.53
   5  -3   3   31.72    2.45
  -5   3  -3   29.89    2.57
   5   3   3   27.78    2.45
  -6  -3  -3   21.34    2.41
   6  -3   3   24.60    2.30
   6   3   3   24.53    2.40
  -6   3  -3   18.42    2.30
  -7  -3  -3    4.05    1.98
   7  -3   3    1.38    1.60
  -7   3  -3    3.22    1.92
   7   3   3    1.29    1.61
   8  -3   3    7.00    1.99
  -8  -3  -3    7.59    2.21
   8   3   3    8.98    2.16
  -8   3  -3    5.28    2.15
  -9  -3  -3   12.75    2.66
   9  -3   3   13.12    2.38
   9   3   3   14.58    2.62
  -9   3  -3   11.39    2.61
 -10  -3  -3   12.46    2.74
  10  -3   3   16.18    2.65
 -10   3  -3    8.29    2.73
  10   3   3   14.84    2.78
 -11  -3  -3   17.32    3.15
  11  -3   3   21.01    2.90
  11   3   3   20.33    3.15
 -11   3  -3   17.27    3.18
  12  -3   3    5.67    2.51
 -12  -3  -3   -1.62    2.49
  12   3   3   -1.30    2.53
 -12   3  -3   -1.64    2.64
  13  -3   3    0.73    2.53
 -13  -3  -3   -2.99    2.67
  13   3   3    1.29    2.71
 -13   3  -3    4.19    3.08
  14  -3   3    2.73    2.86
 -14  -3  -3    1.64    3.05
  14   3   3    0.93    2.80
 -14   3  -3   -2.68    3.08
 -15  -3  -3    4.47    3.07
  15  -3   3    7.95    3.18
 -15   3  -3   10.13    3.73
  15   3   3    8.16    3.37
  16  -3   3    0.18    2.95
  16   3   3    5.55    3.39
 -16   3  -3    4.19    3.65
  17  -3   3   -4.61    3.01
  17   3   3    5.21    3.75
 -19   4   3   -5.79    3.29
  19   4  -3   -6.94    3.29
  18  -4  -3    2.13    2.95
 -18   4   3    1.34    3.46
  18   4  -3    2.36    3.44
  17  -4  -3   -0.91    2.77
 -17  -4   3    0.82    2.54
 -17   4   3   -3.81    2.97
  17   4  -3    0.26    3.06
 -16  -4   3    1.99    2.66
  16  -4  -3    0.97    2.77
  16   4  -3    1.19    2.96
 -16   4   3   -2.89    2.95
 -15  -4   3   -5.62    2.09
  15  -4  -3    1.81    2.44
  15   4  -3    5.02    2.95
 -15   4   3    2.24    2.86
  14  -4  -3    1.85    2.25
 -14  -4   3   -4.25    2.23
  14   4  -3    2.25    2.49
 -14   4   3   -4.30    2.37
  13  -4  -3   44.48    3.95
 -13  -4   3   41.54    3.89
  13   4  -3   45.59    4.13
 -13   4   3   30.67    3.83
  12  -4  -3    6.55    2.16
 -12  -4   3   10.29    2.53
 -12   4   3    4.95    2.47
  12   4  -3    7.76    2.43
  11  -4  -3  108.27    5.66
 -11  -4   3  102.32    5.62
  11   4  -3   98.75    5.76
 -11   4   3  103.68    5.90
  10  -4  -3   17.99    2.34
 -10  -4   3   19.06    2.54
 -10   4   3   16.29    2.56
  10   4  -3   16.40    2.50
  -9  -4   3   28.97    2.76
   9  -4  -3   31.57    2.73
  -9   4   3   29.66    2.92
   9   4  -3   29.87    2.82
   8  -4  -3    3.78    1.59
  -8  -4   3    4.35    1.68
   8   4  -3    7.95    1.80
  -8   4   3    6.55    1.85
   7  -4  -3   12.82    1.81
  -7  -4   3   12.01    1.87
  -7   4   3   16.38    2.06
   7   4  -3   13.30    1.88
   6  -4  -3    9.31    1.53
  -6  -4   3    5.91    1.52
  -6   4   3    7.41    1.70
   6   4  -3    8.12    1.55
   5  -4  -3    0.53    1.19
  -5  -4   3   -0.69    1.21
  -5   4   3   -0.93    1.29
   5   4  -3    0.68    1.27
   4  -4  -3    6.15    1.27
  -4  -4   3    5.44    1.21
   4   4  -3    8.10    1.32
   4   4  -3    8.62    1.26
  -4   4   3    6.73    1.23
  -4   4   3    6.38    1.37
  -3  -4   3   22.76    1.72
  -3  -4   3   29.69    2.39
   3  -4  -3   18.22    1.66
   3   4  -3   29.09    2.03
  -3   4   3   30.04    1.97
  -3   4   3   31.06    2.05
   3   4  -3   27.96    2.01
   2  -4  -3   21.60    2.33
   2   4  -3   19.18    1.43
  -2   4   3   21.05    1.44
   2   4  -3   20.02    1.53
  -2   4   3   16.84    1.42
   1  -4  -3   13.46    2.21
  -1   4   3   14.72    1.22
  -1   4   3   13.59    1.21
   1   4  -3   12.72    1.28
   1   4  -3   13.78    1.25
   0  -4   3  235.51    9.84
   0   4   3  238.30    9.91
   0   4   3  236.25    9.92
   0   4  -3  253.80    9.98
   1  -4   3   88.24    4.04
  -1   4  -3   94.56    4.19
   1   4   3   85.26    4.15
   1   4   3   84.85    4.14
  -1   4  -3   95.45    4.20
  -2  -4  -3   -0.27    1.12
   2  -4   3    2.84    1.03
   2   4   3    1.42    1.09
  -2   4  -3    0.77    1.22
   2   4   3    1.38    1.12
   3  -4   3   59.70    3.27
  -3  -4  -3   61.10    3.32
  -3   4  -3   68.07    3.44
   3   4   3   60.54    3.40
   4  -4   3    0.33    1.20
  -4  -4  -3    2.01    1.41
  -4   4  -3   -0.33    1.42
   4   4   3   -0.65    1.30
  -5  -4  -3    2.68    1.56
   5  -4   3    4.26    1.36
  -5   4  -3    2.12    1.59
   5   4   3    0.71    1.44
  -6  -4  -3   -0.90    1.62
   6  -4   3    0.20    1.43
   6   4   3    1.69    1.53
  -6   4  -3   -1.14    1.57
  -7  -4  -3    0.73    1.84
   7  -4   3   -0.70    1.52
  -7   4  -3   -0.32    1.82
   7   4   3    2.51    1.68
  -8  -4  -3   -0.46    1.94
   8  -4   3    0.92    1.77
  -8   4  -3    2.94    2.01
   8   4   3    1.82    1.89
  -9  -4  -3    5.01    2.26
   9  -4   3   -0.10    1.85
   9   4   3    0.19    1.99
  -9   4  -3    1.28    2.24
 -10  -4  -3   12.44    2.79
  10  -4   3   16.28    2.57
  10   4   3   10.16    2.67
 -10   4  -3   12.70    2.80
 -11  -4  -3    6.60    2.63
  11  -4   3    4.02    2.27
  11   4   3    5.10    2.55
 -11   4  -3    8.95    2.80
 -12  -4  -3    4.24    2.46
  12  -4   3    4.72    2.43
 -12   4  -3    2.28    2.80
  12   4   3    2.97    2.76
  13  -4   3   -1.33    2.41
 -13  -4  -3    9.16    2.71
 -13   4  -3   -0.42    2.90
  13   4   3    3.06    2.91
  14  -4   3    7.91    2.86
 -14  -4  -3    7.17    2.96
  14   4   3    7.59    3.26
 -14   4  -3    6.98    3.32
  15  -4   3    4.91    2.99
  15   4   3    0.80    3.11
 -15   4  -3   -4.81    3.18
  16  -4   3    1.57    3.05
  16   4   3    5.30    3.63
 -16   4  -3    2.49    3.54
  19   5  -3    5.64    3.90
 -19   5   3    1.95    3.71
 -18   5   3   -2.34    3.32
  18   5  -3    1.18    3.51
  17  -5  -3   11.94    3.15
  17   5  -3    6.17    3.47
 -17   5   3    7.18    3.45
  16  -5  -3   23.80    3.48
 -16   5   3   15.92    3.72
  16   5  -3   21.31    3.99
 -15  -5   3    7.13    2.34
  15  -5  -3    1.81    2.27
 -15   5   3    0.13    2.82
  15   5  -3   -1.50    2.59
  14  -5  -3    1.42    2.14
 -14  -5   3    3.06    2.18
 -14   5   3    0.06    2.60
  14   5  -3    1.89    2.56
 -13  -5   3    7.03    2.30
  13  -5  -3   10.66    2.43
  13   5  -3    9.24    2.71
 -13   5   3   11.46    2.85
  12  -5  -3  132.29    6.57
 -12  -5   3  123.21    6.59
 -12   5   3  121.00    6.93
  12   5  -3  129.43    6.93
 -11  -5   3   -1.73    1.95
  11  -5  -3    0.97    1.88
 -11   5   3   -1.53    2.12
  11   5  -3    0.40    2.03
 -10  -5   3   36.17    3.07
  10  -5  -3   32.41    2.96
 -10   5   3   35.20    3.35
  10   5  -3   37.36    3.29
   9  -5  -3   17.49    2.14
  -9  -5   3   16.56    2.23
  -9   5   3   16.42    2.49
   9   5  -3   17.62    2.36
   8  -5  -3    5.22    1.55
  -8  -5   3    4.33    1.66
  -8   5   3    4.18    1.85
   8   5  -3    4.86    1.74
  -7  -5   3    2.23    1.44
   7  -5  -3    1.25    1.32
   7   5  -3    0.50    1.48
  -7   5   3    4.43    1.72
   6  -5  -3    1.75    1.22
  -6  -5   3   -1.48    1.27
   6   5  -3   -1.08    1.34
  -6   5   3    0.10    1.46
   5  -5  -3   16.04    1.56
  -5  -5   3   13.39    1.48
  -5   5   3   12.79    1.70
   5   5  -3   15.66    1.61
  -5   5   3   13.82    1.62
   5   5  -3   12.08    1.63
  -4  -5   3   41.73    3.28
   4   5  -3   38.07    2.45
  -4   5   3   45.14    2.60
   4   5  -3   39.09    2.50
  -4   5   3   43.73    2.56
  -3  -5   3   40.47    3.51
   3   5  -3   45.47    2.56
  -3   5   3   52.54    2.60
   3   5  -3   42.98    2.55
  -3   5   3   44.94    2.54
   2  -5  -3    1.26    2.06
  -2   5   3    2.78    0.94
   2   5  -3    2.88    0.92
   2   5  -3    1.98    0.99
  -2   5   3    3.10    0.90
   1  -5  -3   72.40    4.58
  -1   5   3   73.26    3.41
   1   5  -3   75.82    3.50
   1   5  -3   79.89    3.51
  -1   5   3   71.11    3.41
   0  -5  -3    2.86    2.10
   0   5   3    4.46    0.96
   0   5   3    5.00    0.98
   0   5  -3    6.23    1.08
   1   5   3   28.39    2.12
   1   5   3   32.27    2.08
  -1   5  -3   33.33    2.17
  -1   5  -3   31.52    2.19
   2  -5   3  375.58   15.52
  -2   5  -3  381.65   15.64
   2   5   3  368.14   15.57
  -2   5  -3  397.72   15.67
  -3  -5  -3  195.94    8.48
   3  -5   3  200.15    8.48
   3   5   3  200.76    8.62
  -3   5  -3  205.19    8.65
   3   5   3  197.92    8.57
  -4  -5  -3   89.26    4.40
   4  -5   3   91.16    4.34
  -4   5  -3   91.44    4.61
   4   5   3   85.34    4.52
   5  -5   3    8.09    1.54
  -5  -5  -3    7.71    1.66
   5   5   3    8.85    1.71
  -5   5  -3    8.04    1.78
   6  -5   3    5.07    1.60
  -6  -5  -3    2.07    1.67
   6   5   3    5.17    1.74
  -6   5  -3    4.87    1.80
  -7  -5  -3    2.89    1.85
   7  -5   3    1.69    1.61
   7   5   3    2.91    1.76
  -7   5  -3    2.08    1.90
   8  -5   3   -0.41    1.62
  -8  -5  -3    5.69    2.04
  -8   5  -3   -1.25    1.97
   8   5   3    2.32    1.96
  -9  -5  -3   21.47    2.81
   9  -5   3   23.24    2.69
   9   5   3   20.72    2.97
  -9   5  -3   20.25    2.92
 -10  -5  -3   17.69    2.73
  10  -5   3   14.63    2.48
  10   5   3   12.43    2.82
 -10   5  -3   20.61    3.07
  11  -5   3   15.37    2.64
 -11  -5  -3   16.24    2.71
 -11   5  -3   12.66    2.93
  11   5   3   14.95    3.09
 -12  -5  -3   16.40    2.85
  12  -5   3   12.06    2.70
 -12   5  -3   13.79    3.27
  12   5   3   16.54    3.29
  13  -5   3    5.76    2.64
 -13   5  -3    0.98    2.98
  13   5   3    2.84    2.88
  14  -5   3   10.72    2.83
  14   5   3   11.83    3.44
 -14   5  -3   12.68    3.57
 -15   5  -3   21.74    4.25
  15   5   3   27.33    4.48
 -16   5  -3   11.54    3.99
  16   5   3    4.14    3.56
  18   6  -3    9.41    3.81
 -18   6   3    2.32    3.37
 -17   6   3   -2.19    3.05
  17   6  -3    2.21    3.35
 -16   6   3   -5.59    2.78
  16   6  -3    0.39    3.03
  15  -6  -3    4.33    2.25
  15   6  -3    7.83    3.15
 -15   6   3    9.38    3.21
  14  -6  -3   -2.21    1.86
  14   6  -3    4.44    2.62
 -14   6   3    3.46    2.72
 -13  -6   3    2.56    1.85
  13  -6  -3    3.07    2.11
  13   6  -3    3.17    2.43
 -13   6   3    4.21    2.56
  12  -6  -3   30.17    2.98
 -12  -6   3   30.44    3.02
  12   6  -3   23.04    3.26
 -12   6   3   25.52    3.35
 -11  -6   3    6.11    2.17
  11  -6  -3   14.59    2.27
  11   6  -3    9.30    2.47
 -11   6   3    7.43    2.51
  10  -6  -3   52.81    3.62
 -10  -6   3   52.03    3.63
  10   6  -3   60.58    4.11
 -10   6   3   59.85    4.18
  -9  -6   3   36.81    2.88
   9  -6  -3   35.92    2.84
  -9   6   3   37.48    3.33
   9   6  -3   31.09    3.02
   8  -6  -3    4.35    1.54
  -8  -6   3    5.63    1.64
   8   6  -3    6.64    1.84
  -8   6   3    5.43    1.91
  -7  -6   3   28.62    2.42
   7  -6  -3   32.28    2.38
   7   6  -3   28.44    2.50
  -7   6   3   30.98    2.62
  -6  -6   3   26.58    1.99
   6  -6  -3   26.38    2.09
  -6   6   3   23.08    2.24
   6   6  -3   25.14    2.24
   5   6  -3   31.88    2.44
  -5   6   3   38.82    2.49
  -5   6   3   37.12    2.60
   5   6  -3   31.98    2.46
  -4   6   3   54.93    2.92
   4   6  -3   47.13    2.81
   4   6  -3   52.49    2.84
  -4   6   3   52.22    2.87
   3  -6  -3    2.47    2.28
  -3  -6   3    1.75    2.08
  -3   6   3    5.19    1.15
  -3   6   3    3.40    0.98
   3   6  -3    2.78    1.06
   3   6  -3    4.62    1.01
   2  -6  -3  395.59   17.69
  -2  -6   3  380.13   17.57
  -2   6   3  402.36   15.91
  -2   6   3  400.40   15.89
   2   6  -3  367.01   15.91
   2   6  -3  409.86   15.93
   1  -6  -3    0.29    2.17
  -1   6   3   -0.34    0.75
  -1   6   3    0.04    0.84
   1   6  -3    0.69    0.86
   1   6  -3   -0.13    0.90
   0  -6  -3  145.11    7.36
   0   6   3  136.84    6.01
   0   6   3  141.58    6.03
   0   6  -3  147.58    6.13
   1  -6   3   80.64    3.60
  -1   6  -3   87.93    3.96
  -1   6  -3   88.76    3.94
   1   6   3   80.47    3.81
   1   6   3   77.88    3.84
   2   6   3   11.79    1.43
  -2   6  -3   16.72    1.62
  -2   6  -3   13.94    1.61
  -3  -6  -3    0.52    0.30
   3  -6   3   -0.81    0.94
  -3   6  -3   -0.28    1.28
   3   6   3    0.67    1.28
   3   6   3    0.30    1.24
   4  -6   3   12.74    1.53
  -4  -6  -3   14.17    1.61
  -4   6  -3   16.58    1.96
   4   6   3   13.47    1.84
  -5  -6  -3   15.31    1.83
   5  -6   3   13.24    1.67
   5   6   3   16.24    2.04
  -5   6  -3   16.78    2.10
  -6  -6  -3   -0.08    1.49
   6  -6   3    1.71    1.40
  -6   6  -3    1.23    1.73
   6   6   3   -2.04    1.50
   7  -6   3    8.26    1.70
  -7  -6  -3    9.63    2.01
   7   6   3    7.55    2.02
  -7   6  -3    5.80    2.07
   8  -6   3    8.17    1.94
  -8  -6  -3   12.61    2.27
  -8   6  -3    6.82    2.28
   8   6   3   13.22    2.42
   9  -6   3   19.82    2.46
  -9  -6  -3   15.35    2.54
  -9   6  -3   13.01    2.69
   9   6   3   19.41    2.95
 -10  -6  -3    0.74    1.94
  10  -6   3    1.38    1.78
 -10   6  -3   -1.62    2.16
  10   6   3    0.72    2.28
  11  -6   3   -1.06    1.81
 -11   6  -3    1.37    2.62
  11   6   3    1.53    2.41
  12  -6   3   11.84    2.48
  12   6   3   12.61    3.20
 -12   6  -3    7.46    3.00
  13  -6   3    8.54    2.54
  13   6   3   12.56    3.45
 -13   6  -3    7.34    3.18
  14   6   3    0.19    2.94
 -14   6  -3    4.47    3.17
 -15   6  -3   -0.99    3.28
  15   6   3    4.41    3.42
  16   6   3    3.08    3.58
 -16   6  -3   10.25    3.93
 -18   7   3   -4.02    3.24
  18   7  -3    5.93    3.83
 -17   7   3    1.82    3.27
  17   7  -3    5.82    3.51
  16   7  -3   -2.14    2.99
 -16   7   3    5.11    3.20
  15   7  -3    2.27    2.80
 -15   7   3   -1.56    2.73
 -14   7   3   16.21    3.30
  14   7  -3   13.82    3.22
  13  -7  -3    3.54    1.93
 -13   7   3   -1.00    2.35
  13   7  -3    1.34    2.51
  12  -7  -3    6.79    1.91
 -12   7   3    2.63    2.43
  12   7  -3    5.99    2.47
  11  -7  -3   20.11    2.37
 -11  -7   3   13.95    2.32
 -11   7   3   22.86    3.04
  11   7  -3   22.00    3.01
  10  -7  -3    6.30    1.75
 -10  -7   3    5.55    1.79
 -10   7   3    6.95    2.30
  10   7  -3    2.29    2.09
   9  -7  -3    1.46    1.55
  -9  -7   3   -0.13    1.57
  -9   7   3    1.73    1.99
   9   7  -3    2.21    1.89
   8  -7  -3    1.38    1.33
  -8  -7   3   -1.91    1.37
   8   7  -3   -1.37    1.64
  -8   7   3   -0.49    1.76
   7  -7  -3    6.49    1.40
  -7  -7   3    2.07    0.82
   7   7  -3    3.23    1.68
  -7   7   3    4.50    1.81
  -6  -7   3   51.64    2.89
   6   7  -3   63.43    3.49
   6   7  -3   63.67    3.53
  -6   7   3   70.80    3.65
   5   7  -3    7.67    1.52
  -5   7   3   13.00    1.53
  -5   7   3    7.27    1.53
   5   7  -3    9.07    1.49
  -4  -7   3   66.76    4.55
   4   7  -3   61.84    3.25
  -4   7   3   67.04    3.27
   4   7  -3   59.78    3.26
  -4   7   3   65.44    3.33
   3  -7  -3    5.84    2.46
  -3  -7   3    3.28    2.31
  -3   7   3    4.31    1.00
   3   7  -3    3.91    1.10
  -3   7   3    6.10    1.17
   3   7  -3    5.29    1.01
  -2  -7   3    4.01    2.32
   2  -7  -3   -1.39    2.34
  -2   7   3    3.25    0.96
   2   7  -3    1.89    0.99
  -2   7   3    2.52    0.87
   2   7  -3    6.07    0.91
   1  -7  -3  111.67    6.20
   1   7  -3  113.46    4.83
   1   7  -3  115.62    4.82
  -1   7   3  112.40    4.76
  -1   7   3  100.40    4.73
   0  -7  -3    0.51    2.41
   0   7   3    0.57    0.85
   0   7  -3    2.11    0.99
   0   7   3    0.30    0.81
   1   7   3   58.81    3.06
  -1   7  -3   65.58    3.22
   1   7   3   63.45    3.13
  -1   7  -3   64.00    3.22
   2  -7   3   33.38    1.79
   2   7   3   29.87    2.15
  -2   7  -3   29.25    2.33
  -2   7  -3   33.81    2.34
   3   7   3   30.83    2.44
   3   7   3   30.47    2.33
  -3   7  -3   30.70    2.50
  -3   7  -3   40.67    2.59
   4  -7   3   27.39    2.03
  -4   7  -3   32.87    2.62
   4   7   3   26.22    2.22
   4   7   3   28.26    2.38
   5  -7   3   14.41    1.59
  -5  -7  -3   12.97    1.47
  -5   7  -3   13.16    2.04
   5   7   3   13.53    2.00
  -6  -7  -3   76.79    4.07
   6  -7   3   74.49    4.04
  -6   7  -3   79.44    4.56
   6   7   3   77.50    4.44
  -7  -7  -3    2.72    1.52
   7  -7   3    1.64    1.48
   7   7   3   -0.25    1.77
  -7   7  -3   -1.99    1.85
  -8  -7  -3    1.81    1.62
   8  -7   3    1.20    1.49
   8   7   3    1.14    1.99
  -8   7  -3    0.55    2.13
   9  -7   3    1.67    1.56
   9   7   3   -0.36    2.13
  -9   7  -3   -0.14    2.16
  10  -7   3   18.63    2.36
  10   7   3   15.71    2.94
 -10   7  -3   14.46    2.87
 -11   7  -3   -0.08    2.52
  11   7   3    2.87    2.63
  12   7   3    3.27    2.88
 -12   7  -3    0.12    2.63
  13   7   3   -0.44    2.89
 -13   7  -3    1.52    2.99
  14   7   3    4.38    3.15
 -14   7  -3   -4.47    2.96
  15   7   3    1.90    3.23
 -15   7  -3   -1.26    3.26
  18   8  -3    5.47    3.86
 -18   8   3    5.45    3.76
 -17   8   3   14.60    3.79
  17   8  -3   19.96    4.12
 -16   8   3   15.51    3.71
  16   8  -3   20.22    4.00
 -15   8   3    2.15    2.93
  15   8  -3   -0.95    2.77
  14   8  -3   -3.45    2.58
 -14   8   3   -3.05    2.56
 -13   8   3    4.59    2.67
  13   8  -3    2.56    2.61
 -12   8   3    3.84    2.44
  12   8  -3   -4.07    2.15
  11   8  -3   20.57    3.03
 -11   8   3   21.46    3.08
  10  -8  -3   13.31    1.89
 -10   8   3   15.21    2.66
  10   8  -3   10.58    2.47
  -9  -8   3   -0.39    1.22
   9  -8  -3    0.14    1.25
   9   8  -3    0.72    1.93
  -9   8   3    0.08    1.99
   8  -8  -3    5.77    1.48
  -8   8   3    6.97    2.09
   8   8  -3    5.08    1.92
  -7  -8   3   27.71    1.96
   7   8  -3   31.25    2.64
  -7   8   3   28.81    2.64
   6   8  -3    3.27    1.46
   6   8  -3    4.18    1.58
  -6   8   3    2.52    1.45
  -6   8   3    6.06    1.63
  -5  -8   3    0.60    2.34
  -5   8   3    1.81    1.43
  -5   8   3    2.04    1.26
   5   8  -3   -0.09    1.23
   5   8  -3   -1.35    1.26
  -4  -8   3   68.06    4.83
   4   8  -3   60.56    3.37
   4   8  -3   69.07    3.33
  -4   8   3   67.56    3.35
  -4   8   3   63.59    3.39
  -3  -8   3   45.28    4.11
   3  -8  -3   44.88    4.05
  -3   8   3   45.85    2.54
   3   8  -3   43.12    2.53
  -3   8   3   43.15    2.44
   3   8  -3   44.82    2.46
   2  -8  -3   21.51    3.14
  -2  -8   3   23.75    3.07
  -2   8   3   21.31    1.69
   2   8  -3   28.69    1.69
   2   8  -3   22.54    1.82
   1  -8  -3   -0.80    2.55
   1   8  -3    2.69    0.96
   1   8  -3    1.62    0.82
   0  -8  -3    2.56    2.58
   0   8  -3    4.02    1.06
  -1  -8  -3   30.48    3.35
   1   8   3   27.50    1.97
  -1   8  -3   28.90    2.06
  -1   8  -3   30.04    2.08
   1   8   3   24.60    1.88
  -2   8  -3   22.21    1.87
  -2   8  -3   19.92    1.88
   2   8   3   20.85    1.83
  -3   8  -3    0.58    1.39
   3   8   3    0.52    1.26
   3   8   3   -0.87    1.32
  -3   8  -3   -1.58    1.33
  -4   8  -3   11.21    1.85
   4   8   3   11.08    1.65
   4   8   3   11.75    1.84
  -5  -8  -3   -1.49    1.03
   5  -8   3    1.53    1.09
  -5   8  -3    1.37    1.68
   5   8   3    0.64    1.62
   6  -8   3    4.16    1.26
   6   8   3    4.06    1.87
  -6   8  -3    3.30    1.91
   7  -8   3   46.91    3.04
  -7   8  -3   52.24    3.91
   7   8   3   49.17    3.76
   8  -8   3   -0.86    1.27
   8   8   3    2.39    2.11
  -8   8  -3    3.05    2.14
  -9   8  -3    0.54    2.23
   9   8   3   -0.25    2.17
  10   8   3    3.68    2.49
 -10   8  -3    0.15    2.39
  11   8   3   -1.82    2.53
 -11   8  -3   -0.69    2.59
  12   8   3    1.92    3.00
 -12   8  -3   -2.99    2.56
 -13   8  -3    7.08    3.17
  13   8   3   13.01    3.55
  14   8   3    2.39    3.14
 -14   8  -3    2.71    3.27
 -15   8  -3    1.08    3.39
  15   8   3    2.21    3.35
  17   9  -3    0.44    3.57
 -17   9   3   -0.35    3.20
 -16   9   3    8.90    3.26
  16   9  -3    9.06    3.62
 -15   9   3    1.36    3.00
  15   9  -3   -0.10    2.97
 -14   9   3    0.81    2.81
  14   9  -3    2.43    2.86
  13   9  -3   13.42    3.17
 -13   9   3    5.79    2.88
  12   9  -3    7.03    2.74
 -12   9   3    9.31    2.73
 -11   9   3   15.78    2.88
  11   9  -3   15.81    2.83
 -10   9   3    3.58    2.28
  10   9  -3    1.35    2.20
   9   9  -3    3.72    2.15
  -9   9   3    4.68    2.17
   8   9  -3   63.72    4.03
  -8   9   3   61.32    4.12
   7   9  -3    8.07    1.92
  -7   9   3    9.55    2.02
   6   9  -3    9.15    1.71
  -6   9   3    9.80    1.71
   6   9  -3    7.69    1.79
  -6   9   3    8.53    1.84
  -5  -9   3    6.79    2.74
   5   9  -3    7.59    1.52
   5   9  -3    7.49    1.55
  -5   9   3    6.81    1.63
  -5   9   3    6.11    1.48
   4  -9  -3   11.46    3.19
  -4  -9   3   14.71    3.06
  -4   9   3   10.17    1.53
   4   9  -3    9.79    1.51
   4   9  -3   12.45    1.46
  -4   9   3   13.62    1.47
  -3  -9   3   -3.41    2.60
   3  -9  -3   -1.31    2.79
  -3   9   3    0.02    0.93
   3   9  -3    1.40    0.97
   3   9  -3    1.60    1.11
  -3   9   3    0.82    1.10
  -2  -9   3  143.99    8.07
   2  -9  -3  147.52    8.13
   2   9  -3  148.35    6.42
   2   9  -3  157.04    6.38
   1  -9  -3   -0.43    2.80
   1   9  -3    2.56    0.99
   1   9  -3    0.83    0.81
   0  -9  -3    0.93    2.82
   0   9  -3    2.12    1.04
  -1  -9  -3   -2.18    2.62
  -1   9  -3    2.18    1.13
  -1   9  -3   -0.30    1.12
   1   9   3   -0.09    1.03
   1   9   3   -0.54    1.01
  -2   9  -3    5.84    1.44
   2   9   3    6.10    1.16
  -2   9  -3    5.30    1.41
   2   9   3    5.80    1.35
  -3   9  -3    3.47    1.50
  -3   9  -3    3.46    1.54
   3   9   3    4.90    1.50
   3   9   3    3.21    1.38
   4   9   3    6.25    1.63
   4   9   3   10.73    1.85
  -4   9  -3    9.41    1.86
   5   9   3   -0.15    1.70
  -5   9  -3    3.57    1.80
  -6   9  -3    2.60    1.91
   6   9   3    2.49    1.83
   7   9   3    4.15    2.10
  -7   9  -3    5.18    2.22
   8   9   3    2.34    2.19
  -8   9  -3    3.15    2.20
  -9   9  -3    0.11    2.26
   9   9   3    0.97    2.37
 -10   9  -3   22.79    3.28
  10   9   3   22.90    3.37
  11   9   3   22.26    3.61
 -11   9  -3   18.15    3.35
 -12   9  -3    9.31    3.12
  12   9   3   12.82    3.50
 -13   9  -3    2.28    3.03
  13   9   3   -2.58    2.95
  14   9   3   14.74    3.72
 -14   9  -3    9.92    3.63
  16  10  -3   20.08    4.09
 -16  10   3    4.71    3.23
  15  10  -3    8.70    3.50
 -15  10   3    9.93    3.34
 -14  10   3   -6.52    2.59
  14  10  -3    0.14    3.03
  13  10  -3   -0.74    2.66
 -13  10   3    3.01    2.76
  12  10  -3    4.95    2.72
 -12  10   3    2.90    2.63
  11  10  -3   17.38    2.99
 -11  10   3   14.06    2.87
  10  10  -3   15.10    2.72
 -10  10   3   12.65    2.63
   9  10  -3    2.23    2.13
  -9  10   3    0.20    2.06
   8  10  -3   -2.71    1.86
  -8  10   3   -2.11    1.92
  -7  10   3   93.15    5.01
   7  10  -3   91.38    4.94
   6  10  -3    4.28    1.75
  -6  10   3    3.92    1.77
  -5 -10   3   -0.16    2.82
   5  10  -3    0.73    1.41
  -5  10   3    2.02    1.51
   5  10  -3    1.79    1.34
  -5  10   3    1.71    1.38
  -4 -10   3   40.72    4.19
   4 -10  -3   40.65    4.34
   4  10  -3   36.79    2.44
  -4  10   3   39.24    2.57
  -4  10   3   38.69    2.47
   4  10  -3   34.45    2.51
   3 -10  -3    2.42    3.04
  -3 -10   3    4.35    2.90
  -3  10   3    5.19    1.23
   3  10  -3    5.33    1.11
   3  10  -3    1.83    1.21
  -3  10   3    0.41    1.02
  -2 -10   3   61.09    5.23
   2 -10  -3   63.75    5.28
   1 -10  -3    0.39    3.09
  -1 -10   3    1.95    2.91
   0 -10  -3    2.19    3.03
   0  10  -3    3.34    1.08
   0  10  -3    0.82    0.98
  -1 -10  -3   34.80    3.94
   1  10   3   28.96    2.17
  -1  10  -3   36.52    2.41
  -1  10  -3   34.52    2.31
   2  10   3    1.09    1.14
  -2  10  -3    1.82    1.39
  -2  10  -3    0.53    1.37
   2  10   3    2.40    1.33
   3  10   3    9.41    1.74
   3  10   3    6.64    1.49
  -3  10  -3   10.65    1.77
  -4  10  -3    2.64    1.69
   4  10   3    1.82    1.69
   5  10   3   25.83    2.65
  -5  10  -3   24.90    2.56
   6  10   3    0.85    2.04
  -6  10  -3    4.35    1.93
   7  10   3   -1.54    2.07
  -7  10  -3   -2.07    1.98
  -8  10  -3    0.51    2.19
   8  10   3    0.52    2.33
  -9  10  -3    2.14    2.43
   9  10   3    2.04    2.46
 -10  10  -3   12.48    2.94
  10  10   3    4.35    2.87
 -11  10  -3   -0.97    2.69
  11  10   3    2.00    2.91
 -12  10  -3    0.60    2.84
  12  10   3   -0.41    3.05
 -13  10  -3   12.69    3.55
  13  10   3    5.66    3.39
 -14  10  -3    6.08    3.41
  14  10   3    9.32    3.71
 -16  11   3    2.86    3.24
  16  11  -3    0.30    3.45
  15  11  -3    7.01    3.62
 -15  11   3    4.28    3.10
  14  11  -3    8.97    3.31
 -14  11   3    3.76    3.02
 -13  11   3    5.50    2.95
  13  11  -3    3.11    2.96
 -12  11   3   -4.60    2.44
  12  11  -3   -0.18    2.60
 -11  11   3    3.34    2.52
  11  11  -3    0.63    2.56
  10  11  -3    3.55    2.48
 -10  11   3    1.73    2.36
   9  11  -3    1.17    2.20
  -9  11   3   -1.67    2.06
   8  11  -3    1.18    2.03
  -8  11   3    1.39    1.94
   7  11  -3    1.95    1.92
  -7  11   3    0.23    1.89
   6  11  -3    3.18    1.77
  -6  11   3    7.60    1.89
  -5 -11   3    0.69    2.95
   5 -11  -3   -1.83    3.43
   5  11  -3    0.21    1.55
  -5  11   3   -0.04    1.54
  -4 -11   3   21.34    3.89
   4 -11  -3   30.58    4.18
   4  11  -3   22.72    1.87
   4  11  -3   21.53    1.96
  -4  11   3   20.33    1.96
  -4  11   3   19.25    1.86
  -3 -11   3    1.75    3.14
   3 -11  -3   10.74    3.62
   2 -11  -3  102.13    6.94
  -2 -11   3  103.89    7.02
  -1 -11   3   23.55    3.87
   1 -11  -3   16.22    3.71
   0 -11  -3    8.97    3.48
   0  11  -3   15.22    1.47
   0  11  -3   12.44    1.37
  -1 -11  -3   31.11    4.17
  -1  11  -3   37.03    2.41
   2  11   3    0.07    1.17
   2  11   3    0.60    1.37
  -2  11  -3    0.86    1.41
   3  11   3    2.46    1.62
  -3  11  -3    1.98    1.65
   4  11   3    4.27    1.77
  -4  11  -3   -0.23    1.72
  -5  11  -3   11.34    2.13
   5  11   3    7.12    2.12
  -6  11  -3   12.94    2.33
   6  11   3   14.17    2.41
   7  11   3    1.25    2.25
  -7  11  -3    2.49    2.20
   8  11   3   14.09    2.89
  -8  11  -3    8.07    2.58
   9  11   3    2.55    2.59
  -9  11  -3   -2.21    2.30
 -10  11  -3    1.43    2.60
  10  11   3   -0.21    2.89
 -11  11  -3   -1.46    2.73
  11  11   3   -2.09    2.93
  12  11   3    0.74    3.12
 -12  11  -3    1.24    3.02
 -13  11  -3    3.79    3.32
  13  11   3    2.65    3.46
 -15  12   3   15.71    3.56
  15  12  -3   14.28    3.99
 -14  12   3   10.65    3.45
  14  12  -3   19.47    3.87
 -13  12   3   15.32    3.31
  13  12  -3   18.99    3.67
 -12  12   3    8.97    2.96
  12  12  -3   13.56    3.30
 -11  12   3   -1.99    2.36
  11  12  -3    0.46    2.64
 -10  12   3   26.63    3.26
  10  12  -3   26.29    3.34
  -9  12   3   -0.72    2.16
   9  12  -3   -1.38    2.25
   8  12  -3   -0.01    2.11
  -8  12   3    3.50    2.08
   7  12  -3   19.59    2.53
  -7  12   3   21.25    2.49
   6  12  -3   -2.06    1.70
  -6  12   3    0.55    1.70
   5 -12  -3   18.85    4.17
  -5 -12   3   22.07    3.95
   5  12  -3   17.47    2.09
  -5  12   3   18.74    2.10
  -4 -12   3    4.52    3.40
   4 -12  -3    3.79    3.53
   4  12  -3    1.64    1.43
  -4  12   3    1.31    1.43
  -3 -12   3    1.82    3.30
   3 -12  -3   -1.05    3.41
   2 -12  -3   25.09    4.29
  -2 -12   3   22.22    4.21
   1 -12  -3    4.03    3.53
  -1 -12   3   -2.44    3.35
   0 -12  -3   20.83    4.21
   0 -12   3   29.52    4.42
   0  12  -3   21.22    1.86
  -1 -12  -3   48.01    4.94
  -1  12  -3   47.86    2.81
  -2  12  -3    1.22    1.47
   3  12   3    2.20    1.64
  -3  12  -3    1.54    1.61
  -4  12  -3    4.12    1.83
   4  12   3    3.94    1.94
  -5  12  -3    5.72    2.02
   5  12   3    8.49    2.24
  -6  12  -3    1.41    2.17
   6  12   3    1.49    2.14
   7  12   3    3.62    2.42
  -7  12  -3   -0.63    2.14
   8  12   3   14.28    3.04
  -8  12  -3   12.98    2.76
   9  12   3   29.71    3.74
  -9  12  -3   27.22    3.44
 -10  12  -3    6.18    2.89
  10  12   3   -0.62    3.04
 -11  12  -3    0.28    2.86
  11  12   3   -0.28    3.05
  12  12   3    6.87    3.49
 -12  12  -3   -3.75    2.94
  14  13  -3    4.95    3.45
 -14  13   3   -2.20    2.93
  13  13  -3   22.30    4.02
 -13  13   3   21.20    3.59
  12  13  -3    6.31    3.13
 -12  13   3    1.43    2.70
 -11  13   3   -0.20    2.49
  11  13  -3   -1.74    2.69
  10  13  -3   -0.35    2.54
 -10  13   3   -1.20    2.38
  -9  13   3    7.65    2.50
   9  13  -3    7.61    2.58
  -8  13   3    5.28    2.25
   8  13  -3    1.62    2.20
   7  13  -3   -0.07    2.02
  -7  13   3    3.76    1.97
   6 -13  -3    2.30    3.89
   6  13  -3   -3.71    1.74
  -6  13   3    1.85    1.76
   5 -13  -3    4.66    3.77
  -5 -13   3    1.67    3.44
   5  13  -3    2.44    1.66
  -5  13   3    0.61    1.61
   4 -13  -3    3.08    3.80
  -4 -13   3    5.09    3.72
   3 -13  -3   -1.89    3.55
  -3 -13   3    0.14    3.50
   2 -13  -3   25.43    4.51
  -2 -13   3   22.66    4.46
   1 -13  -3   19.96    4.45
  -1 -13   3   20.38    4.40
   0 -13  -3   16.01    4.13
   0 -13   3   11.27    4.10
  -1 -13  -3   -1.08    3.36
   1 -13   3    2.73    3.86
  -1  13  -3    4.94    1.41
  -2  13  -3    1.40    1.52
   3  13   3   -0.34    1.68
  -3  13  -3    1.16    1.69
  -4  13  -3    0.84    1.78
   4  13   3   -1.05    1.84
  -5  13  -3   -1.80    1.89
   5  13   3   -1.43    2.01
  -6  13  -3    0.54    2.12
   6  13   3    3.07    2.34
   7  13   3    6.08    2.67
  -7  13  -3    3.86    2.42
  -8  13  -3    3.31    2.52
   8  13   3    2.38    2.74
  -9  13  -3    7.42    2.81
   9  13   3    2.95    2.94
 -10  13  -3   -1.13    2.70
  10  13   3    1.50    3.20
 -11  13  -3    1.40    2.91
  11  13   3    1.20    3.31
  12  13   3    9.47    3.77
  13  14  -3   -4.65    3.15
 -13  14   3    1.61    3.00
 -12  14   3    3.04    2.80
  12  14  -3   -3.07    3.07
  11  14  -3    0.37    2.87
 -11  14   3   -0.11    2.61
 -10  14   3   -2.43    2.33
  10  14  -3   -2.30    2.59
   9  14  -3    1.66    2.58
  -9  14   3    7.64    2.53
  -8  14   3   -4.97    2.05
   8  14  -3   -3.24    2.23
   7 -14  -3   28.38    5.14
   7  14  -3   21.80    2.79
  -7  14   3   24.71    2.71
   6 -14  -3   -1.48    3.98
   6  14  -3    1.29    1.98
  -6  14   3    1.31    1.83
  -5 -14   3   -1.70    3.61
   5 -14  -3    2.06    4.04
  -5  14   3    0.94    1.64
   5  14  -3   -0.99    1.70
  -4 -14   3   -5.69    3.72
   4 -14  -3   -9.25    3.74
  -3 -14   3    0.90    3.99
   3 -14  -3   -0.90    3.99
  -2 -14   3    3.38    3.97
   2 -14  -3    5.44    4.05
   1 -14  -3    1.73    4.10
  -1 -14   3    9.80    4.17
   0 -14  -3    5.84    4.10
   0 -14   3    8.46    4.12
   1 -14   3   -5.75    3.99
  -1 -14  -3    1.39    3.61
  -2  14  -3   -1.22    1.49
  -3  14  -3   -1.28    1.69
  -4  14  -3   14.07    2.16
   4  14   3   11.23    2.17
  -5  14  -3    0.00    2.13
   5  14   3    0.25    2.23
  -6  14  -3    3.66    2.25
   6  14   3    6.01    2.55
  -7  14  -3   -0.32    2.35
   7  14   3   -0.72    2.58
  -8  14  -3   -1.65    2.39
   8  14   3   -1.01    2.82
   9  14   3    1.63    3.22
  -9  14  -3    2.68    2.69
  10  14   3    1.09    3.26
 -10  14  -3   -1.36    2.83
  11  14   3    5.11    3.51
  12  15  -3    4.62    3.36
 -12  15   3    2.20    2.88
 -11  15   3   -0.24    2.63
  11  15  -3   -4.72    2.80
  10  15  -3    7.78    3.02
 -10  15   3    9.62    2.70
  -9  15   3    2.43    2.42
   9  15  -3    3.33    2.75
   8 -15  -3   12.64    4.93
   8  15  -3   15.27    2.79
  -8  15   3   14.76    2.62
   7 -15  -3    6.00    4.50
   7  15  -3    6.29    2.29
  -7  15   3    1.08    2.14
   6 -15  -3    7.93    4.61
  -6  15   3    9.07    2.12
   6  15  -3    8.42    2.21
   5 -15  -3    6.39    4.57
  -5  15   3   12.89    1.96
  -4 -15   3    9.63    4.35
   4 -15  -3   13.56    4.84
  -3 -15   3    3.79    4.24
   3 -15  -3    4.44    4.39
  -2 -15   3    0.34    4.06
   2 -15  -3   -2.10    4.22
   1 -15  -3    1.52    4.24
  -1 -15   3    1.17    4.31
   0 -15  -3    8.25    4.32
   0 -15   3    8.33    4.49
   1 -15   3    4.22    4.35
   2 -15   3    7.23    4.64
  -2  15  -3   13.30    1.85
  -3  15  -3   -0.63    1.72
   4  15   3    9.13    2.24
  -4  15  -3   11.76    2.26
  -5  15  -3    1.53    2.14
   5  15   3    1.78    2.28
  -6  15  -3    2.65    2.34
   6  15   3   -1.33    2.46
   7  15   3    1.93    2.75
  -7  15  -3   -1.96    2.33
   8  15   3    3.05    3.04
  -8  15  -3    0.09    2.56
   9  15   3    4.55    3.36
  -9  15  -3    4.79    2.90
 -10  16   3    9.94    2.75
  10  16  -3    6.53    3.14
   9 -16  -3   -8.93    4.72
   9  16  -3   -0.18    2.71
  -9  16   3    1.05    2.44
   8 -16  -3   -0.44    4.76
   8  16  -3    0.58    2.51
  -8  16   3   -1.77    2.20
   7 -16  -3   18.94    5.22
  -7  16   3   16.77    2.50
   7  16  -3   18.59    2.76
   6 -16  -3    0.37    4.67
  -6  16   3   -3.29    1.85
   6  16  -3    0.38    2.04
   5 -16  -3    1.40    4.71
   4 -16  -3    1.26    4.61
  -4 -16   3    3.61    4.41
  -3 -16   3   -3.28    4.44
   3 -16  -3   -3.12    4.53
  -2 -16   3   10.93    4.85
   2 -16  -3    9.43    4.86
   1 -16  -3    3.96    4.55
  -1 -16   3    5.84    4.69
   0 -16   3    6.13    4.66
   0 -16  -3    1.50    4.44
   1 -16   3   24.33    5.60
   2 -16   3   18.11    5.28
   3 -16   3   14.30    5.25
  -4  16  -3   -0.82    1.91
   5  16   3    4.98    2.47
  -5  16  -3    1.83    2.15
  -6  16  -3    8.25    2.54
   6  16   3   13.82    2.94
   7  16   3    1.08    2.88
  -7  16  -3   -3.88    2.46
  -8  16  -3    3.73    2.77
   8  16   3    5.16    3.14
   9 -17  -3   14.34    5.70
   8 -17  -3   -1.60    4.94
   8  17  -3   -2.08    2.52
  -8  17   3   -2.08    2.21
   7 -17  -3   -4.16    5.04
  -7  17   3   -2.33    2.04
   6 -17  -3   -7.85    4.73
  -6  17   3   -0.62    1.85
   5 -17  -3    4.42    5.06
   4 -17  -3    3.95    5.00
  -4 -17   3   -6.57    4.31
   3 -17  -3   -5.00    4.79
  -3 -17   3   -0.10    4.84
  -2 -17   3   -1.47    4.90
   2 -17  -3    1.84    5.05
  -1 -17   3    1.03    4.86
   1 -17  -3    0.91    4.74
   0 -17  -3   -2.70    4.53
   0 -17   3   -0.69    4.78
   1 -17   3    2.09    4.97
   2 -17   3    2.21    5.10
   3 -17   3    0.89    4.97
   4 -17   3   -2.05    5.09
  -4  17  -3    3.60    2.00
  -5  17  -3    2.03    2.23
  -6  17  -3    4.04    2.45
   6  17   3    2.87    2.61
   6 -18  -3   -3.82    5.19
   5 -18  -3    2.15    5.30
   4 -18  -3    0.19    5.22
  -4 -18   3   -0.16    4.87
  -3 -18   3   -4.75    5.01
   3 -18  -3    1.44    5.40
   2 -18  -3    3.46    5.29
  -2 -18   3    1.27    5.21
   1 -18  -3   -1.97    5.02
  -1 -18   3   -7.40    5.12
   0 -18  -3    4.17    4.99
   0 -18   3   -2.16    5.10
   1 -18   3   -1.29    5.26
   2 -18   3   -1.66    5.13
   3 -18   3   -1.58    5.35
  20   0  -4    1.71    3.73
 -20   0   4    6.27    3.56
  19   0  -4   37.55    5.06
 -19   0   4   36.58    4.92
 -18   0   4    7.19    3.57
  18   0  -4    3.53    3.39
  17   0  -4   43.83    5.00
 -17   0   4   50.51    5.03
  16   0  -4   19.38    3.71
 -16   0   4   20.55    3.75
  15   0  -4    4.60    2.73
 -15   0   4    1.02    2.79
  14   0  -4   11.05    2.88
 -14   0   4   14.27    3.14
  13   0  -4   15.41    2.88
 -13   0   4   16.09    2.96
 -12   0   4   25.13    3.17
  12   0  -4   26.21    3.14
  11   0  -4    2.05    1.97
 -11   0   4   -0.60    2.07
  10   0  -4   14.24    2.34
 -10   0   4   13.64    2.30
   9   0  -4    2.26    1.74
  -9   0   4   -0.88    1.71
   8   0  -4  118.89    5.87
  -8   0   4  121.00    5.92
  -7   0   4  356.97   14.68
   7   0  -4  340.37   14.65
  -6   0   4   35.70    2.58
   6   0  -4   28.27    2.51
   5   0  -4    0.35    1.34
  -5   0   4   -0.29    1.33
   4   0  -4   -1.19    1.20
  -4   0   4    1.16    1.26
  -3   0   4  399.99   16.40
   3   0  -4  402.62   16.41
  -2   0   4  741.41   30.06
   2   0  -4  753.59   30.08
   1   0  -4  467.43   18.96
  -1   0   4  466.30   18.94
   0   0   4  301.96   12.51
   0   0  -4  304.16   12.52
   1   0   4    3.16    1.22
  -1   0  -4    3.59    1.39
  -2   0  -4   55.78    3.26
   2   0   4   53.61    3.12
   3   0   4   43.54    2.91
  -3   0  -4   42.79    2.94
   4   0   4   17.70    1.98
  -4   0  -4   16.21    2.08
   5   0   4  101.90    5.18
  -5   0  -4  104.00    5.31
  -6   0  -4    5.92    2.02
   6   0   4    8.17    1.86
   7   0   4   11.07    2.14
  -7   0  -4   15.67    2.46
   8   0   4   55.93    4.04
  -8   0  -4   56.77    4.11
   9   0   4   -0.55    1.93
  -9   0  -4    0.53    2.20
 -10   0  -4   67.31    4.97
  10   0   4   78.08    5.02
 -11   0  -4    4.87    2.80
  11   0   4    1.88    2.42
  12   0   4    6.80    2.92
 -12   0  -4    5.84    3.03
 -13   0  -4    1.76    3.04
  13   0   4   -0.50    2.75
 -14   0  -4    3.43    3.41
  14   0   4    4.28    3.07
  15   0   4    9.50    3.51
 -15   0  -4    1.90    3.37
  16   0   4    3.73    3.39
 -16   0  -4   15.50    4.06
  20  -1  -4   15.46    4.23
 -20  -1   4   19.51    4.30
  20   1  -4   21.79    4.64
 -20   1   4   10.48    4.16
 -19  -1   4    2.35    3.39
  19  -1  -4    6.71    3.62
 -19   1   4    2.73    3.60
  19   1  -4    5.68    3.66
 -18  -1   4    8.53    3.51
  18  -1  -4   11.49    3.67
 -18   1   4   11.09    3.73
  18   1  -4   15.78    3.90
  17  -1  -4    1.86    2.96
 -17  -1   4   -0.98    2.95
  17   1  -4    3.47    3.10
 -17   1   4    3.42    3.18
 -16  -1   4    2.40    3.00
  16  -1  -4    0.19    2.85
  16   1  -4    4.48    3.10
 -16   1   4    6.10    3.15
  15  -1  -4   -2.50    2.32
 -15  -1   4    3.28    2.77
 -15   1   4    6.72    2.94
  15   1  -4    1.23    2.59
  14  -1  -4    3.83    2.57
 -14  -1   4   -0.53    2.44
 -14   1   4    0.97    2.51
  14   1  -4    5.82    2.69
 -13  -1   4   -0.08    2.24
  13  -1  -4   -0.43    2.21
 -13   1   4   -0.05    2.49
  13   1  -4    0.43    2.23
  12  -1  -4   36.95    3.59
 -12  -1   4   37.21    3.60
  12   1  -4   33.18    3.49
 -12   1   4   32.45    3.51
  11  -1  -4    5.60    2.16
 -11  -1   4    8.79    2.34
  11   1  -4    5.55    2.15
 -11   1   4    6.83    2.30
  10  -1  -4    0.14    1.75
 -10  -1   4    1.76    1.94
 -10   1   4   -1.41    1.80
  10   1  -4    0.28    1.77
   9  -1  -4    1.07    1.60
  -9  -1   4   -1.70    1.72
   9   1  -4   -0.90    1.56
  -9   1   4    0.46    1.78
   8  -1  -4    9.44    1.87
  -8  -1   4   10.41    1.98
  -8   1   4   10.65    1.97
   8   1  -4   10.48    1.95
  -7  -1   4   52.35    3.24
   7  -1  -4   44.21    3.12
   7   1  -4   53.58    3.27
  -7   1   4   48.52    3.24
   6  -1  -4   27.29    2.44
  -6  -1   4   31.02    2.62
  -6   1   4   33.32    2.48
   6   1  -4   27.37    2.47
   5  -1  -4    0.25    1.29
  -5  -1   4    1.88    1.41
   5   1  -4    2.06    1.39
  -5   1   4    2.48    1.39
   4  -1  -4   10.94    1.53
  -4  -1   4   11.24    1.51
  -4   1   4   11.47    1.51
   4   1  -4    8.95    1.46
   3  -1  -4    4.25    1.10
  -3  -1   4    0.69    1.16
   3  -1  -4    1.33    1.26
  -3   1   4    3.00    1.22
   3   1  -4    0.78    1.21
   2  -1  -4  154.15    7.01
  -2  -1   4  169.47    7.02
   2   1  -4  169.63    7.05
  -2   1   4  163.14    7.01
  -1  -1   4    2.09    1.11
   1  -1  -4    1.91    1.19
  -1   1   4    4.07    1.11
   1   1  -4    2.88    1.21
   0  -1  -4   31.93    2.33
   0  -1   4   29.44    2.32
   0   1  -4   32.69    2.32
   0   1   4   34.03    2.32
  -1  -1  -4   61.38    3.53
   1  -1   4   66.00    3.46
   1   1   4   64.71    3.57
  -1   1  -4   70.22    3.49
  -2  -1  -4    6.56    1.62
   2  -1   4   11.58    1.56
   2   1   4   10.70    1.58
  -2   1  -4   13.31    1.65
  -3  -1  -4   34.19    2.69
   3  -1   4   33.33    2.56
   3   1   4   27.37    2.44
  -3   1  -4   34.44    2.74
  -4  -1  -4    8.13    1.84
   4  -1   4    8.48    1.63
  -4   1  -4    9.52    1.83
   4   1   4   10.85    1.75
  -5  -1  -4   50.24    3.29
   5  -1   4   49.50    3.18
   5   1   4   43.00    3.21
  -5   1  -4   48.23    3.41
   6  -1   4    1.77    1.54
  -6  -1  -4    1.35    1.82
   6   1   4   -0.25    1.46
  -6   1  -4    0.51    1.65
  -7  -1  -4   38.32    3.41
   7  -1   4   35.58    3.21
   7   1   4   38.46    3.21
  -7   1  -4   38.44    3.39
  -8  -1  -4   14.19    2.65
   8  -1   4   14.49    2.41
  -8   1  -4   15.56    2.64
   8   1   4   16.82    2.55
  -9  -1  -4    0.45    2.32
   9  -1   4    2.71    2.04
  -9   1  -4    4.00    2.39
   9   1   4    2.11    2.07
  10  -1   4    8.92    2.47
 -10  -1  -4    2.41    2.57
 -10   1  -4    2.43    2.54
  10   1   4    3.81    2.32
 -11  -1  -4   28.47    3.76
  11  -1   4   28.36    3.53
  11   1   4   27.62    3.59
 -11   1  -4   30.15    3.80
  12  -1   4   21.45    3.41
 -12  -1  -4   19.20    3.55
  12   1   4   23.34    3.54
 -12   1  -4   14.06    3.36
 -13  -1  -4    1.62    2.97
  13  -1   4    7.86    3.08
 -13   1  -4    5.51    3.21
  13   1   4    4.95    2.94
 -14  -1  -4   -2.07    3.13
  14  -1   4    0.80    2.84
 -14   1  -4    0.77    3.05
  14   1   4    1.67    2.95
  15  -1   4   -5.11    2.80
 -15  -1  -4   -0.18    3.17
  15   1   4   -1.46    2.99
 -15   1  -4    5.05    3.60
 -16  -1  -4    4.68    3.77
  16  -1   4    1.02    3.33
  16   1   4   -0.37    3.37
 -16   1  -4   -1.62    3.45
  19  -2  -4    4.69    3.33
 -19  -2   4   -3.60    3.12
  19   2  -4    4.58    3.64
 -19   2   4    0.75    3.50
  18  -2  -4    6.51    3.25
 -18  -2   4   -3.62    2.96
 -18   2   4    5.63    3.50
  18   2  -4   -2.77    3.01
 -17  -2   4    8.99    3.10
  17  -2  -4    2.34    2.97
  17   2  -4   11.59    3.54
 -17   2   4    6.42    3.32
  16  -2  -4    5.29    2.89
 -16  -2   4   -0.30    2.73
  16   2  -4    4.90    2.95
 -16   2   4    5.86    3.11
 -15  -2   4    8.59    3.02
  15  -2  -4    4.59    2.71
  15   2  -4   10.12    3.09
 -15   2   4   12.64    3.24
 -14  -2   4   -0.32    2.42
  14  -2  -4    0.05    2.35
  14   2  -4    3.51    2.51
 -14   2   4   -1.74    2.43
  13  -2  -4    5.17    2.36
 -13  -2   4    5.80    2.51
 -13   2   4    1.59    2.52
  13   2  -4    2.03    2.36
  12  -2  -4    3.63    2.16
 -12  -2   4    6.89    2.41
 -12   2   4    5.40    2.40
  12   2  -4    6.30    2.40
  11  -2  -4   34.23    3.23
 -11  -2   4   27.65    3.06
 -11   2   4   30.29    3.14
  11   2  -4   29.49    3.13
  10  -2  -4    3.14    1.78
 -10  -2   4    0.23    1.91
  10   2  -4    4.90    1.87
 -10   2   4    1.77    1.90
   9  -2  -4    0.55    1.67
  -9  -2   4   -1.00    1.68
   9   2  -4   -1.44    1.62
  -9   2   4    1.91    1.81
   8  -2  -4   17.08    2.11
  -8  -2   4   11.61    2.02
   8   2  -4   13.23    2.06
  -8   2   4   13.38    2.09
  -7  -2   4   42.99    3.08
   7  -2  -4   46.69    3.08
  -7   2   4   49.76    3.23
   7   2  -4   43.35    3.03
   6  -2  -4    1.59    1.44
  -6  -2   4    3.45    1.55
   6   2  -4    3.57    1.45
  -6   2   4    4.82    1.55
   5  -2  -4    9.15    1.59
  -5  -2   4   10.43    1.59
   5   2  -4   10.00    1.57
  -5   2   4   10.62    1.67
  -4  -2   4   16.56    1.71
   4  -2  -4   18.70    1.78
  -4   2   4   15.60    1.70
   4   2  -4   17.52    1.68
  -3  -2   4   18.63    1.60
   3  -2  -4   21.00    1.81
   3  -2  -4   18.48    1.66
  -3   2   4   15.86    1.58
   3   2  -4   14.21    1.61
   2  -2  -4   32.24    2.25
  -2  -2   4   34.69    2.28
  -2   2   4   31.55    2.26
  -2   2   4   30.77    2.19
   2   2  -4   31.44    2.27
   2   2  -4   34.82    2.32
   1  -2  -4   60.65    3.04
  -1  -2   4   55.08    2.97
   1   2  -4   55.37    2.98
  -1   2   4   54.97    3.02
  -1   2   4   51.58    2.93
   0  -2  -4   24.62    1.87
   0   2   4   22.80    2.07
   0   2  -4   24.87    2.12
   1  -2   4   38.00    2.41
  -1  -2  -4   34.68    2.44
  -1   2  -4   35.53    2.49
   1   2   4   30.81    2.45
  -2  -2  -4   33.79    2.53
   2  -2   4   28.37    2.36
   2   2   4   28.94    2.37
  -2   2  -4   29.51    2.51
  -3  -2  -4   -0.25    1.43
   3  -2   4    0.32    1.26
   3   2   4   -0.55    1.29
  -3   2  -4    0.28    1.42
   4  -2   4    2.06    1.38
  -4  -2  -4    2.85    1.51
  -4   2  -4    1.43    1.54
   4   2   4    4.00    1.51
  -5  -2  -4    0.19    1.60
   5  -2   4    1.93    1.49
  -5   2  -4    0.41    1.69
   5   2   4    0.46    1.49
   6  -2   4   -2.29    1.46
  -6  -2  -4    3.93    1.88
  -6   2  -4   -1.54    1.64
   6   2   4    3.22    1.55
   7  -2   4   40.79    3.29
  -7  -2  -4   47.70    3.54
  -7   2  -4   49.08    3.72
   7   2   4   40.22    3.43
  -8  -2  -4    4.69    2.30
   8  -2   4    7.04    2.10
  -8   2  -4    5.81    2.27
   8   2   4    4.00    1.95
   9  -2   4    5.04    2.15
  -9  -2  -4    7.68    2.53
  -9   2  -4    7.36    2.50
   9   2   4    4.73    2.24
 -10  -2  -4    0.36    2.50
  10  -2   4    1.40    2.24
  10   2   4   -1.72    2.10
 -10   2  -4    0.47    2.44
 -11  -2  -4   -2.41    2.51
  11  -2   4   -1.87    2.31
 -11   2  -4   -3.09    2.40
  11   2   4    3.34    2.43
  12  -2   4    1.38    2.57
 -12  -2  -4   -1.29    2.65
 -12   2  -4   -1.03    2.69
  12   2   4    4.63    2.79
  13  -2   4   19.29    3.52
 -13  -2  -4   20.97    3.77
  13   2   4   17.89    3.66
 -13   2  -4   14.13    3.73
 -14  -2  -4   35.69    4.59
  14  -2   4   45.92    4.71
 -14   2  -4   47.41    5.11
  14   2   4   52.48    5.22
  15  -2   4    3.83    3.28
 -15  -2  -4   -1.33    3.19
 -15   2  -4    1.75    3.61
  15   2   4    0.64    3.18
  16  -2   4   10.94    3.73
 -16  -2  -4   13.56    3.92
 -16   2  -4    4.79    3.86
  16   2   4    4.07    3.61
  19  -3  -4    2.55    3.37
 -19   3   4    2.56    3.69
  19   3  -4    6.11    3.69
  18  -3  -4   24.34    3.98
 -18  -3   4   20.52    3.96
 -18   3   4   12.72    3.88
  18   3  -4   25.59    4.35
 -17  -3   4   11.03    3.37
  17  -3  -4   14.28    3.36
  17   3  -4    9.50    3.57
 -17   3   4   11.83    3.55
  16  -3  -4   20.33    3.42
 -16  -3   4   18.25    3.53
  16   3  -4   22.06    3.76
 -16   3   4   16.55    3.59
  15  -3  -4    7.81    2.72
 -15  -3   4    2.42    2.62
  15   3  -4    8.31    2.93
 -15   3   4    3.57    2.79
  14  -3  -4   22.84    3.21
 -14  -3   4   27.36    3.49
  14   3  -4   25.69    3.51
 -14   3   4   20.83    3.41
 -13  -3   4   20.20    3.09
  13  -3  -4   23.49    3.10
  13   3  -4   18.41    3.13
 -13   3   4   18.38    3.05
 -12  -3   4    0.90    2.23
  12  -3  -4    2.71    2.13
 -12   3   4    2.67    2.32
  12   3  -4    0.76    2.10
  11  -3  -4   -2.76    1.82
 -11  -3   4    0.17    2.00
  11   3  -4   -1.62    1.93
 -11   3   4   -1.83    1.95
 -10  -3   4    5.98    2.14
  10  -3  -4    9.31    2.07
  10   3  -4    5.23    2.06
 -10   3   4    8.80    2.18
   9  -3  -4    3.92    1.73
  -9  -3   4    6.38    1.86
  -9   3   4   -0.38    1.69
   9   3  -4    5.35    1.82
   8  -3  -4    4.47    1.62
  -8  -3   4    1.95    1.65
  -8   3   4    5.60    1.78
   8   3  -4    3.93    1.70
  -7  -3   4   12.01    1.84
   7  -3  -4    9.98    1.70
   7   3  -4    8.71    1.77
  -7   3   4   11.22    1.86
   6  -3  -4    2.54    1.37
  -6  -3   4    0.69    1.44
  -6   3   4    2.36    1.51
   6   3  -4    2.39    1.41
   5  -3  -4    4.54    1.44
  -5  -3   4    6.71    1.48
  -5   3   4    5.29    1.49
   5   3  -4    7.80    1.46
   4  -3  -4   40.87    2.62
  -4  -3   4   44.03    2.68
  -4  -3   4   43.51    2.90
  -4   3   4   44.55    2.72
   4   3  -4   42.41    2.69
  -3  -3   4   31.92    2.36
  -3  -3   4   34.89    2.60
   3  -3  -4   35.59    2.36
   3  -3  -4   34.19    2.84
   3   3  -4   35.26    2.36
  -3   3   4   35.10    2.37
  -3   3   4   34.43    2.38
   3   3  -4   34.42    2.32
   2  -3  -4    6.01    1.84
   2  -3  -4    7.06    1.32
  -2  -3   4   10.03    1.28
  -2   3   4   10.74    1.29
   2   3  -4   10.70    1.28
   2   3  -4    7.58    1.37
  -2   3   4   12.24    1.34
   1  -3  -4    3.08    1.16
  -1  -3   4    1.20    1.05
  -1   3   4    3.55    1.08
   1   3  -4    3.03    1.19
   1   3  -4    2.93    1.10
  -1   3   4    2.62    1.11
   0  -3   4   16.69    1.54
   0  -3  -4   18.65    1.69
   0   3   4   20.15    1.67
   0   3   4   19.56    1.66
   0   3  -4   20.98    1.73
  -1  -3  -4    8.73    1.50
   1  -3   4   10.33    1.42
   1   3   4   12.74    1.49
  -1   3  -4   13.36    1.58
  -2  -3  -4   45.61    2.95
   2  -3   4   51.88    2.91
   2   3   4   51.99    3.00
  -2   3  -4   50.72    3.03
  -3  -3  -4    1.49    1.38
   3  -3   4    0.90    1.25
  -3   3  -4    0.58    1.37
   3   3   4   -0.13    1.29
  -4  -3  -4   30.20    2.62
   4  -3   4   29.85    2.54
   4   3   4   28.12    2.46
  -4   3  -4   31.74    2.73
  -5  -3  -4    2.59    1.65
   5  -3   4    1.79    1.38
  -5   3  -4   -1.18    1.56
   5   3   4   -0.34    1.45
  -6  -3  -4   12.96    2.08
   6  -3   4   10.87    1.90
   6   3   4    9.03    1.92
  -6   3  -4    7.52    2.08
   7  -3   4    1.33    1.65
  -7  -3  -4   -2.66    1.80
   7   3   4   -0.66    1.66
  -7   3  -4   -2.63    1.79
  -8  -3  -4   11.80    2.52
   8  -3   4   15.22    2.35
   8   3   4   13.35    2.37
  -8   3  -4   14.67    2.62
  -9  -3  -4    2.07    2.37
   9  -3   4    5.06    2.13
   9   3   4    2.31    2.17
  -9   3  -4   -1.55    2.24
  10  -3   4    4.35    2.34
 -10  -3  -4    2.70    2.50
  10   3   4    6.78    2.54
 -10   3  -4    3.91    2.48
 -11  -3  -4   -2.20    2.37
  11  -3   4   -0.16    2.19
  11   3   4    3.28    2.52
 -11   3  -4    3.23    2.58
 -12  -3  -4   13.64    3.27
  12  -3   4   14.46    3.13
 -12   3  -4   15.46    3.44
  12   3   4   13.12    3.16
  13  -3   4    5.33    2.79
 -13  -3  -4    6.29    3.00
  13   3   4    4.03    3.17
 -13   3  -4    4.32    3.24
 -14  -3  -4   10.66    3.41
  14  -3   4   12.58    3.32
 -14   3  -4    6.31    3.37
  14   3   4   10.82    3.61
  15  -3   4    3.58    3.22
 -15  -3  -4    4.32    3.13
  15   3   4    9.50    3.53
 -15   3  -4   -1.19    3.40
  16  -3   4    6.47    3.47
  16   3   4    3.76    3.47
 -16   3  -4   -5.24    3.35
 -19   4   4   14.58    4.23
  19   4  -4   16.81    4.31
  18  -4  -4   12.39    3.41
  18   4  -4    5.35    3.63
 -18   4   4    7.64    3.74
  17  -4  -4   28.92    3.96
 -17  -4   4   19.91    3.57
  17   4  -4   22.59    4.18
 -17   4   4   12.07    3.80
  16  -4  -4    3.72    2.83
 -16  -4   4    1.48    2.57
  16   4  -4    4.99    3.05
 -16   4   4    1.74    3.02
 -15  -4   4    7.61    2.61
  15  -4  -4    8.47    2.77
 -15   4   4    6.37    2.92
  15   4  -4    7.42    2.97
 -14  -4   4   20.77    3.24
  14  -4  -4   23.25    3.22
 -14   4   4   22.45    3.41
  14   4  -4   30.43    3.73
  13  -4  -4   -1.60    2.09
 -13  -4   4   -0.94    2.25
  13   4  -4    2.99    2.43
 -13   4   4   -4.01    2.20
  12  -4  -4   -0.62    2.08
 -12  -4   4    3.59    2.27
 -12   4   4    0.54    2.19
  12   4  -4    0.84    2.19
 -11  -4   4   39.08    3.42
  11  -4  -4   43.55    3.56
  11   4  -4   45.26    3.75
 -11   4   4   42.95    3.66
  10  -4  -4    7.14    1.94
 -10  -4   4    5.75    1.99
 -10   4   4    6.95    2.05
  10   4  -4    2.50    2.00
   9  -4  -4   18.82    2.19
  -9  -4   4   18.94    2.32
   9   4  -4   15.28    2.26
  -9   4   4   14.27    2.29
   8  -4  -4   -1.24    1.43
  -8  -4   4    2.08    1.62
  -8   4   4   -0.64    1.61
   8   4  -4    0.71    1.55
   7  -4  -4  111.44    5.32
  -7  -4   4  109.11    5.34
   7   4  -4  111.05    5.46
  -7   4   4  111.92    5.50
  -6  -4   4   -1.56    1.35
   6  -4  -4    1.54    1.34
  -6   4   4    0.60    1.44
   6   4  -4   -0.12    1.34
   5  -4  -4   -0.26    1.24
  -5  -4   4    1.80    1.26
   5   4  -4    0.35    1.30
  -5   4   4    1.68    1.34
   4  -4  -4    0.82    1.17
  -4  -4   4    3.02    1.73
  -4  -4   4    2.46    1.15
   4   4  -4    2.06    1.14
  -4   4   4    2.94    1.29
  -4   4   4    3.07    1.12
   4   4  -4    2.88    1.22
   3  -4  -4   87.72    4.10
  -3  -4   4   94.93    4.13
  -3  -4   4   82.17    4.67
   3  -4  -4   90.60    4.84
  -3   4   4   92.20    4.19
  -3   4   4   87.03    4.17
   3   4  -4   85.00    4.18
   3   4  -4   90.09    4.22
   2  -4  -4   26.18    2.51
  -2  -4   4   21.22    1.83
   2  -4  -4   21.75    1.75
  -2   4   4   21.89    1.94
  -2   4   4   25.85    1.94
   2   4  -4   25.59    2.01
   2   4  -4   23.47    2.06
   1  -4  -4    0.09    0.92
  -1  -4   4    0.65    0.96
   1   4  -4   -0.16    1.08
  -1   4   4    1.02    1.00
   1   4  -4   -0.23    1.02
  -1   4   4    0.80    1.02
   0  -4  -4  149.81    6.56
   0  -4   4  154.57    6.59
   0   4   4  146.74    6.66
   0   4   4  155.57    6.67
   0   4  -4  156.18    6.71
   0   4  -4  162.44    6.73
  -1  -4  -4  115.56    5.12
   1  -4   4  114.34    5.10
   1   4   4  109.33    5.21
  -1   4  -4  118.88    5.25
   1   4   4  111.79    5.17
   2  -4   4   31.24    2.18
  -2  -4  -4   31.01    2.22
   2   4   4   24.20    2.26
  -2   4  -4   27.64    2.35
   3  -4   4    8.99    1.49
  -3  -4  -4    9.02    1.62
   3   4   4   11.80    1.67
  -3   4  -4   10.69    1.69
  -4  -4  -4    5.66    1.65
   4  -4   4    7.04    1.46
  -4   4  -4    9.98    1.82
   4   4   4    7.53    1.64
   5  -4   4    9.89    1.71
  -5  -4  -4    7.71    1.81
   5   4   4    8.64    1.85
  -5   4  -4    7.71    1.89
   6  -4   4    3.13    1.54
  -6  -4  -4    0.58    1.75
   6   4   4   -0.53    1.61
  -6   4  -4    0.57    1.76
  -7  -4  -4    8.92    2.19
   7  -4   4    7.04    1.85
   7   4   4   11.47    2.18
  -7   4  -4   11.37    2.23
  -8  -4  -4    1.63    2.11
   8  -4   4   -2.28    1.75
  -8   4  -4    2.18    2.14
   8   4   4    1.91    1.86
   9  -4   4   42.22    3.56
  -9  -4  -4   38.32    3.67
   9   4   4   38.43    3.70
  -9   4  -4   34.44    3.59
 -10  -4  -4   24.38    3.39
  10  -4   4   36.21    3.43
  10   4   4   30.86    3.54
 -10   4  -4   28.30    3.52
  11  -4   4   14.37    2.76
 -11  -4  -4   10.61    2.74
  11   4   4    9.53    2.88
 -11   4  -4   14.51    3.15
  12  -4   4   -1.86    2.41
 -12  -4  -4    0.60    2.39
  12   4   4   -0.95    2.70
 -12   4  -4   -2.11    2.62
  13  -4   4    4.91    2.73
 -13  -4  -4    6.49    2.89
  13   4   4    2.40    3.15
 -13   4  -4    5.13    3.28
  14  -4   4    4.60    2.83
  14   4   4   -1.69    2.99
 -14   4  -4    4.66    3.39
  15  -4   4   15.48    3.61
 -15   4  -4    9.51    3.77
  15   4   4   15.82    3.98
 -16   4  -4   -6.13    3.22
  16   4   4   -3.45    3.41
 -19   5   4    5.62    3.69
  19   5  -4    3.79    3.85
 -18   5   4    0.94    3.39
  18   5  -4    1.05    3.39
  17  -5  -4    2.09    2.63
 -17   5   4    1.00    3.29
  17   5  -4   -1.01    3.13
  16  -5  -4    7.33    2.83
  16   5  -4   14.79    3.61
 -16   5   4   12.48    3.48
  15  -5  -4    8.39    2.57
 -15  -5   4    8.66    2.43
  15   5  -4    9.15    3.12
 -15   5   4    4.48    2.94
 -14  -5   4   16.44    2.75
  14  -5  -4   16.12    2.84
  14   5  -4   14.14    3.12
 -14   5   4   16.60    3.21
  13  -5  -4   -3.36    1.97
 -13  -5   4    2.03    2.03
 -13   5   4    0.77    2.37
  13   5  -4    2.67    2.39
 -12  -5   4  160.36    8.00
  12  -5  -4  169.33    8.05
 -12   5   4  158.64    8.29
  12   5  -4  174.90    8.43
  11  -5  -4   13.37    2.24
 -11  -5   4   10.44    2.38
  11   5  -4    7.20    2.33
 -11   5   4    7.38    2.40
 -10  -5   4    4.10    1.92
  10  -5  -4    6.12    1.87
 -10   5   4    1.56    2.05
  10   5  -4    7.33    2.13
   9  -5  -4    3.02    1.64
  -9  -5   4    6.17    1.78
  -9   5   4    3.22    1.92
   9   5  -4    6.01    1.98
   8  -5  -4   -0.78    1.38
  -8  -5   4    0.95    1.56
  -8   5   4   -0.16    1.66
   8   5  -4    0.17    1.61
   7  -5  -4   20.37    1.99
  -7  -5   4   21.38    2.05
  -7   5   4   17.61    2.17
   7   5  -4   19.31    2.14
   6  -5  -4    0.38    1.24
  -6  -5   4   -0.95    1.28
   6   5  -4    2.33    1.39
  -6   5   4    0.27    1.44
   5  -5  -4   36.29    2.44
  -5  -5   4   37.98    2.43
   5   5  -4   33.31    2.55
  -5   5   4   40.02    2.70
   5   5  -4   37.69    2.60
  -5   5   4   40.12    2.64
  -4  -5   4    3.74    1.07
   4  -5  -4    5.84    1.14
  -4  -5   4    4.06    1.89
  -4   5   4    6.88    1.19
   4   5  -4    4.03    1.22
   4   5  -4    3.02    1.28
  -4   5   4    5.24    1.35
   3  -5  -4    0.41    0.33
  -3  -5   4   -1.95    1.76
  -3  -5   4   -0.58    0.54
   3  -5  -4    0.71    2.02
   3   5  -4   -0.75    1.01
   3   5  -4    0.29    1.10
  -3   5   4   -0.40    0.96
  -3   5   4    0.17    1.09
   2  -5  -4   18.74    2.45
   2   5  -4   14.08    1.49
   2   5  -4   16.61    1.51
  -2   5   4   18.94    1.48
  -2   5   4   15.25    1.45
   1  -5  -4    0.96    2.06
  -1  -5   4    0.39    0.63
   1  -5  -4    0.61    0.60
  -1   5   4   -0.24    0.95
  -1   5   4   -0.27    0.96
   1   5  -4    0.85    1.08
   1   5  -4    1.57    1.08
   0  -5   4   78.06    3.58
   0   5   4   72.53    3.74
   0   5  -4   83.23    3.84
   0   5  -4   80.84    3.84
   0   5   4   75.00    3.73
   1  -5   4   28.16    1.98
  -1   5  -4   31.44    2.23
   1   5   4   24.67    2.19
  -1   5  -4   33.59    2.33
   1   5   4   25.47    2.18
   2  -5   4    2.69    1.08
  -2  -5  -4    1.40    1.21
  -2   5  -4    3.53    1.38
   2   5   4    1.54    1.38
   3  -5   4   15.73    1.64
  -3  -5  -4   17.53    1.77
   3   5   4   16.91    1.86
  -3   5  -4   16.40    1.91
   4  -5   4   -0.47    1.20
  -4  -5  -4    2.63    1.45
   4   5   4    0.87    1.45
  -4   5  -4   -1.54    1.49
   5  -5   4    3.84    1.47
  -5  -5  -4    5.24    1.68
  -5   5  -4    4.34    1.78
   5   5   4    5.41    1.75
  -6  -5  -4   13.70    2.10
   6  -5   4   11.18    1.87
   6   5   4    9.18    2.02
  -6   5  -4   10.57    2.08
  -7  -5  -4    5.20    2.03
   7  -5   4    3.60    1.75
  -7   5  -4    8.92    2.09
   7   5   4    7.08    2.07
  -8  -5  -4   -0.85    1.97
   8  -5   4    1.96    1.84
   8   5   4    1.73    1.90
  -8   5  -4   -0.38    2.12
  -9  -5  -4    3.66    2.18
   9  -5   4    1.44    1.97
  -9   5  -4    0.65    2.29
   9   5   4    3.28    2.34
  10  -5   4    1.48    1.98
 -10  -5  -4   -0.29    2.08
 -10   5  -4    1.18    2.38
  10   5   4   -3.39    2.11
 -11  -5  -4   18.77    3.04
  11  -5   4   25.53    3.16
 -11   5  -4   23.27    3.49
  11   5   4   21.44    3.37
  12  -5   4    6.07    2.59
 -12  -5  -4   -0.39    2.12
 -12   5  -4    2.11    2.85
  12   5   4    0.60    2.77
  13  -5   4   -1.64    2.38
 -13   5  -4    0.94    3.01
  13   5   4    4.21    3.11
  14  -5   4    0.04    2.60
  14   5   4    4.02    3.28
 -14   5  -4    0.79    3.24
  15   5   4    0.71    3.25
 -15   5  -4   -0.73    3.36
  19   6  -4   13.52    4.48
 -19   6   4   20.98    4.31
 -18   6   4   -3.60    3.14
  18   6  -4    5.25    3.65
 -17   6   4   -2.51    3.02
  17   6  -4   -5.94    2.94
  16   6  -4   -1.88    2.82
 -16   6   4    1.05    2.95
  15  -6  -4   11.98    2.56
  15   6  -4    9.29    3.09
 -15   6   4    8.47    3.13
  14  -6  -4    0.97    2.02
 -14  -6   4   -3.01    1.80
 -14   6   4    0.89    2.54
  14   6  -4    0.50    2.42
 -13  -6   4   -0.16    1.82
  13  -6  -4   -0.90    1.82
  13   6  -4   -3.27    2.22
 -13   6   4    1.82    2.37
 -12  -6   4    4.72    1.99
  12  -6  -4    2.45    1.86
 -12   6   4    5.89    2.44
  12   6  -4    2.83    2.36
  11  -6  -4   10.10    2.10
 -11  -6   4    4.07    2.05
 -11   6   4    6.82    2.40
  11   6  -4    5.24    2.30
 -10  -6   4    5.61    1.96
  10  -6  -4    7.71    1.91
  10   6  -4    6.68    2.18
 -10   6   4    6.71    2.24
   9  -6  -4  107.54    5.33
  -9  -6   4  103.67    5.32
   9   6  -4  104.52    5.65
  -9   6   4  112.24    5.70
   8  -6  -4    1.77    1.44
  -8  -6   4    1.58    1.52
   8   6  -4    1.90    1.70
  -8   6   4    2.33    1.68
   7  -6  -4   25.76    2.30
  -7  -6   4   25.37    2.29
  -7   6   4   28.81    2.50
   7   6  -4   28.65    2.48
   6  -6  -4   59.05    3.10
  -6  -6   4   56.12    3.08
   6   6  -4   52.89    3.27
  -6   6   4   58.36    3.40
  -5  -6   4   20.60    2.50
   5  -6  -4   15.14    1.45
  -5   6   4   16.88    1.69
   5   6  -4   19.28    1.73
  -5   6   4   18.56    1.85
   5   6  -4   17.45    1.80
  -4  -6   4  115.75    6.18
   4  -6  -4  121.10    6.35
   4   6  -4  120.50    5.38
  -4   6   4  122.01    5.35
  -4   6   4  124.02    5.41
   4   6  -4  109.27    5.36
   3  -6  -4    3.86    2.27
  -3  -6   4   -0.80    1.99
  -3   6   4    1.51    1.11
   3   6  -4    1.63    1.04
   3   6  -4    0.13    1.12
  -3   6   4    1.48    1.01
   2  -6  -4    1.02    2.18
   2   6  -4    2.09    1.09
  -2   6   4    0.94    0.94
  -2   6   4    3.62    1.07
   2   6  -4    1.78    1.09
  -1  -6   4    7.53    0.82
   1  -6  -4    7.75    2.37
   1   6  -4   11.29    1.30
  -1   6   4   10.40    1.21
   1   6  -4    9.06    1.33
  -1   6   4   10.23    1.20
   0   6   4   13.66    1.30
   0   6  -4   10.58    1.36
   0   6   4    9.97    1.33
   0   6  -4    9.68    1.43
   1  -6   4   10.46    1.07
   1   6   4   12.33    1.48
  -1   6  -4   14.42    1.58
  -1   6  -4   12.33    1.53
   1   6   4   12.51    1.42
   2  -6   4   21.34    1.73
  -2   6  -4   20.96    1.96
   2   6   4   17.44    1.76
   3  -6   4    9.26    1.37
  -3  -6  -4   11.46    1.45
  -3   6  -4    9.71    1.69
   3   6   4   10.59    1.61
  -4  -6  -4   39.04    2.64
   4  -6   4   40.12    2.57
   4   6   4   33.79    2.88
  -4   6  -4   40.66    3.05
  -5  -6  -4    2.93    1.56
   5  -6   4    4.17    1.44
   5   6   4    5.24    1.78
  -5   6  -4    5.36    1.80
  -6  -6  -4   16.00    2.14
   6  -6   4   16.28    2.07
  -6   6  -4   12.28    2.25
   6   6   4   17.11    2.36
  -7  -6  -4    4.67    1.88
   7  -6   4    3.12    1.69
  -7   6  -4    4.95    2.00
   7   6   4    3.33    1.97
   8  -6   4    3.29    1.87
  -8  -6  -4    2.85    1.94
  -8   6  -4    2.69    2.18
   8   6   4    3.39    2.06
   9  -6   4   33.62    3.00
  -9  -6  -4   34.86    3.20
  -9   6  -4   22.72    3.11
   9   6   4   28.20    3.41
  10  -6   4    1.74    1.87
 -10  -6  -4    6.74    2.10
 -10   6  -4    0.91    2.45
  10   6   4    2.06    2.34
  11  -6   4    7.19    2.20
 -11   6  -4   -1.16    2.57
  11   6   4    8.51    2.81
  12  -6   4    7.31    2.25
  12   6   4   -1.45    2.69
 -12   6  -4    2.32    2.91
 -13   6  -4    7.80    3.28
  13   6   4    4.92    3.35
 -14   6  -4    7.47    3.52
  14   6   4   11.80    3.66
  15   6   4    2.64    3.37
 -15   6  -4    4.30    3.53
  18   7  -4   -1.80    3.29
 -18   7   4   -2.85    3.24
 -17   7   4   -0.24    3.20
  17   7  -4    0.72    3.27
 -16   7   4    8.92    3.35
  16   7  -4   10.05    3.42
  15   7  -4   11.36    3.29
 -15   7   4   17.66    3.54
  14   7  -4    0.81    2.62
 -14   7   4    0.82    2.54
  13  -7  -4    2.99    1.86
 -13   7   4    0.09    2.40
  13   7  -4    1.24    2.49
  12  -7  -4   15.65    2.31
 -12   7   4   12.63    2.78
  12   7  -4   17.47    2.96
 -11  -7   4    3.80    1.89
  11  -7  -4   12.16    2.00
 -11   7   4    4.72    2.36
  11   7  -4    9.22    2.46
 -10  -7   4   42.11    3.07
  10  -7  -4   44.53    3.12
 -10   7   4   37.81    3.47
  10   7  -4   42.28    3.63
   9  -7  -4   58.69    3.52
  -9  -7   4   61.90    3.60
   9   7  -4   55.21    4.01
  -9   7   4   59.65    4.03
  -8  -7   4   31.98    2.55
   8  -7  -4   37.39    2.64
   8   7  -4   37.84    3.04
  -8   7   4   30.48    2.86
   7  -7  -4    8.14    1.47
  -7  -7   4    5.03    1.11
  -7   7   4    8.78    1.85
   7   7  -4    7.31    1.81
   6   7  -4   31.74    2.64
  -6   7   4   36.91    2.72
   6   7  -4   33.95    2.66
   5  -7  -4   24.13    1.64
  -5  -7   4   21.83    2.75
  -5   7   4   19.60    1.82
  -5   7   4   19.60    1.97
   5   7  -4   22.03    1.95
   5   7  -4   21.52    1.89
  -4  -7   4    1.94    2.21
   4  -7  -4    0.77    2.36
   4   7  -4    3.23    1.16
  -4   7   4    2.27    1.11
   4   7  -4    2.78    1.26
  -4   7   4    3.54    1.28
  -3  -7   4   -0.68    2.16
   3  -7  -4   -0.96    2.33
  -3   7   4    0.71    1.10
   3   7  -4    0.79    1.01
   3   7  -4    0.58    1.13
  -3   7   4    0.05    0.94
   2  -7  -4    9.35    2.55
   2   7  -4   11.20    1.37
  -2   7   4    9.71    1.27
  -2   7   4    8.70    1.17
   2   7  -4   11.38    1.33
   1  -7  -4    7.92    2.54
   1   7  -4    3.50    1.18
  -1   7   4    2.82    1.02
  -1   7   4    2.51    0.96
   1   7  -4    3.20    1.10
   0   7   4   92.35    4.53
   0   7   4   98.77    4.58
   0   7  -4  101.84    4.64
   0   7  -4  109.32    4.71
   1  -7   4   40.42    2.19
  -1   7  -4   50.05    2.77
   1   7   4   43.40    2.70
  -1   7  -4   52.64    2.85
   1   7   4   42.39    2.60
  -2   7  -4   15.91    1.78
   2   7   4   12.12    1.59
  -3  -7  -4    2.02    0.95
   3  -7   4    3.78    1.11
  -3   7  -4    5.24    1.55
   3   7   4    4.85    1.49
   3   7   4    1.47    1.43
   4  -7   4   28.62    2.16
   4   7   4   24.77    2.43
  -4   7  -4   26.73    2.51
   5  -7   4    3.12    1.37
  -5  -7  -4    3.82    1.52
   5   7   4    6.31    1.88
  -5   7  -4    6.66    1.86
   6  -7   4   56.15    3.21
  -6  -7  -4   47.60    3.22
  -6   7  -4   47.06    3.71
   6   7   4   41.49    3.59
   7  -7   4    0.59    1.44
  -7  -7  -4    0.86    1.56
  -7   7  -4    2.71    1.97
   7   7   4    0.61    1.96
  -8  -7  -4   19.80    2.32
   8  -7   4   12.34    2.05
  -8   7  -4   15.37    2.69
   8   7   4   13.75    2.56
   9  -7   4    8.03    1.97
  -9   7  -4    8.17    2.44
   9   7   4    8.02    2.56
  10  -7   4   10.43    2.14
  10   7   4    7.09    2.71
 -10   7  -4    8.01    2.66
 -11   7  -4   -1.69    2.56
  11   7   4    4.15    2.76
 -12   7  -4   17.87    3.43
  12   7   4   13.70    3.44
  13   7   4    1.72    3.21
 -13   7  -4   -0.27    2.98
  14   7   4    3.67    3.40
 -14   7  -4    3.88    3.39
 -15   7  -4   -3.25    3.28
  15   7   4   -0.01    3.29
  18   8  -4    6.96    3.85
 -18   8   4    1.75    3.56
 -17   8   4    1.01    3.29
  17   8  -4    9.89    3.68
  16   8  -4   -0.88    2.97
 -16   8   4    2.05    3.00
  15   8  -4   -0.19    2.83
 -15   8   4   -0.71    2.77
 -14   8   4   12.01    3.15
  14   8  -4   14.16    3.27
 -13   8   4    3.00    2.57
  13   8  -4    2.57    2.55
 -12   8   4    2.14    2.37
  12   8  -4    2.84    2.44
 -11   8   4   63.20    4.53
  11   8  -4   56.47    4.42
  10  -8  -4   10.31    1.80
  10   8  -4    7.26    2.35
 -10   8   4    7.85    2.38
   9  -8  -4    1.45    1.37
  -9  -8   4    1.24    1.26
  -9   8   4    3.12    2.02
   9   8  -4    1.05    1.94
   8  -8  -4   39.32    2.62
   8   8  -4   39.88    3.25
  -8   8   4   38.45    3.29
  -7  -8   4   10.85    1.25
   7   8  -4   10.92    1.95
  -7   8   4   11.67    2.03
   6  -8  -4   15.72    1.42
  -6   8   4   17.93    2.07
   6   8  -4   14.22    1.88
  -6   8   4   15.24    1.89
   6   8  -4   17.50    2.00
  -5  -8   4    5.88    2.58
  -5   8   4    8.80    1.60
   5   8  -4    4.84    1.40
   5   8  -4    8.27    1.54
  -5   8   4    6.18    1.38
  -4  -8   4    7.26    2.52
   4  -8  -4    8.77    2.77
   4   8  -4    6.25    1.28
   4   8  -4    5.89    1.35
  -4   8   4    5.88    1.23
  -4   8   4    7.38    1.45
   3  -8  -4   -1.05    2.53
  -3  -8   4   -4.91    2.32
   3   8  -4    0.94    1.17
  -3   8   4   -0.53    1.11
   3   8  -4   -0.43    1.02
  -3   8   4   -0.13    0.99
   2  -8  -4    7.41    2.78
  -2   8   4    9.78    1.16
   2   8  -4    9.49    1.31
   2   8  -4    7.11    1.33
  -2   8   4    6.99    1.24
   1  -8  -4   96.05    6.08
  -1   8   4   94.43    4.50
   1   8  -4  110.30    4.67
  -1   8   4   99.57    4.52
   1   8  -4   99.13    4.60
   0  -8  -4   26.90    3.36
   0   8  -4   30.49    2.17
   0   8   4   24.85    1.96
   0   8   4   27.30    2.11
   0   8  -4   31.42    2.27
   1   8   4    2.04    1.22
   1   8   4    0.95    1.15
  -1   8  -4    1.41    1.30
   2  -8   4    4.71    0.85
  -2   8  -4    4.66    1.48
  -2   8  -4    4.38    1.48
   2   8   4    3.20    1.36
  -3   8  -4    5.97    1.61
   3   8   4    4.40    1.49
   3   8   4    4.26    1.55
   4  -8   4    1.18    1.02
  -4   8  -4   -1.39    1.63
   4   8   4    0.92    1.61
   5  -8   4    0.16    1.07
   5   8   4    3.11    1.80
  -5   8  -4    4.49    1.88
   6  -8   4    2.28    1.29
  -6   8  -4    4.69    2.08
   6   8   4    2.74    2.01
   7  -8   4   -0.44    1.30
  -7   8  -4   -0.09    1.92
   7   8   4   -0.69    2.02
  -8   8  -4    3.79    2.32
   8   8   4    2.13    2.17
   9   8   4   -0.57    2.28
  -9   8  -4   -1.44    2.19
 -10   8  -4    6.70    2.69
  10   8   4    8.05    2.82
 -11   8  -4    4.98    2.79
  11   8   4    1.94    2.80
 -12   8  -4   13.52    3.35
  12   8   4   14.02    3.54
 -13   8  -4   -1.35    2.86
  13   8   4    3.30    3.31
 -14   8  -4    4.13    3.41
  14   8   4    0.88    3.38
 -17   9   4    4.47    3.28
  17   9  -4    0.16    3.35
 -16   9   4   11.35    3.34
  16   9  -4    9.33    3.49
 -15   9   4   -2.14    2.86
  15   9  -4    4.44    3.17
  14   9  -4    3.04    2.85
 -14   9   4    9.00    2.97
 -13   9   4    1.11    2.58
  13   9  -4    0.70    2.60
  12   9  -4   20.83    3.26
 -12   9   4   21.01    3.13
 -11   9   4   19.54    2.99
  11   9  -4   23.03    3.09
  10   9  -4   -0.26    2.18
 -10   9   4   -2.01    2.04
   9   9  -4   -0.05    2.03
  -9   9   4    5.48    2.14
   8   9  -4    0.63    1.89
  -8   9   4    1.09    1.88
  -7   9   4   13.58    2.12
   7   9  -4   14.88    2.09
   6   9  -4    7.14    1.62
  -6   9   4    9.49    1.82
  -6   9   4    7.35    1.66
   6   9  -4    7.77    1.80
   5  -9  -4    5.71    3.07
  -5  -9   4    4.11    2.74
   5   9  -4    6.05    1.45
   5   9  -4    6.26    1.57
  -5   9   4    6.94    1.46
  -5   9   4    8.38    1.62
  -4  -9   4   -2.76    2.62
   4  -9  -4   -0.92    2.79
   4   9  -4    1.89    1.19
  -4   9   4   -0.20    1.34
   4   9  -4    1.46    1.33
  -4   9   4    2.04    1.14
  -3  -9   4    6.30    2.78
   3  -9  -4    7.73    2.99
   3   9  -4    5.17    1.36
  -3   9   4    4.08    1.17
   3   9  -4    7.10    1.21
  -3   9   4    2.10    1.25
  -2  -9   4    0.90    2.63
   2  -9  -4    0.04    2.78
  -2   9   4    0.52    0.96
   2   9  -4    0.54    1.13
  -2   9   4   -0.23    1.08
   2   9  -4    0.30    1.05
   1  -9  -4    2.39    2.90
  -1   9   4    1.20    1.06
  -1   9   4    2.00    0.99
   1   9  -4    3.34    1.18
   1   9  -4    3.04    1.15
   0  -9  -4   -1.61    2.69
   0   9  -4    0.43    1.17
   0   9   4    1.56    1.12
   0   9  -4    1.53    1.20
   0   9   4    0.52    0.98
   1   9   4   53.95    3.02
  -1   9  -4   56.95    3.12
   1   9   4   49.13    2.89
  -2   9  -4    0.74    1.42
  -2   9  -4    0.38    1.45
   2   9   4    0.46    1.28
   3   9   4    0.33    1.55
  -3   9  -4    2.10    1.57
   3   9   4   -0.40    1.44
  -4   9  -4   35.78    3.00
   4   9   4   30.71    2.78
  -5   9  -4    8.62    2.09
   5   9   4    4.68    1.99
  -6   9  -4    3.41    2.01
   6   9   4    1.24    2.00
  -7   9  -4    3.41    2.08
   7   9   4    1.76    2.15
   8   9   4   20.66    2.98
  -8   9  -4   21.50    2.99
   9   9   4    1.33    2.42
  -9   9  -4   -2.05    2.22
  10   9   4   11.28    3.03
 -10   9  -4   12.55    3.03
 -11   9  -4    2.87    2.78
  11   9   4    0.78    2.79
 -12   9  -4    3.13    2.91
  12   9   4    2.49    3.18
 -13   9  -4    1.37    3.11
  13   9   4   -0.74    3.40
 -14   9  -4   -0.36    3.29
  14   9   4    4.65    3.52
 -17  10   4    6.96    3.35
  17  10  -4    6.16    3.71
 -16  10   4   -3.36    2.97
  16  10  -4   -3.20    3.15
 -15  10   4   -0.75    2.84
  15  10  -4   -2.68    3.02
  14  10  -4   19.99    3.71
 -14  10   4   20.04    3.60
 -13  10   4    8.12    2.78
  13  10  -4    2.43    2.83
  12  10  -4   23.54    3.43
 -12  10   4   20.29    3.17
 -11  10   4    4.51    2.49
  11  10  -4    6.81    2.57
 -10  10   4    2.09    2.22
  10  10  -4    4.15    2.33
   9  10  -4    6.37    2.23
  -9  10   4    5.52    2.24
   8  10  -4   33.54    3.02
  -8  10   4   32.11    3.04
  -7  10   4    6.13    1.97
   7  10  -4    2.52    1.82
   6  10  -4   28.00    2.52
  -6  10   4   31.27    2.74
   5 -10  -4   40.22    4.38
  -5 -10   4   51.28    4.66
   5  10  -4   37.82    2.85
   5  10  -4   40.19    2.80
  -5  10   4   41.79    2.80
  -5  10   4   41.21    2.94
   4 -10  -4    5.42    3.18
  -4 -10   4    0.51    2.93
   4  10  -4    0.97    1.34
   4  10  -4    1.80    1.30
  -4  10   4    1.97    1.18
  -4  10   4   -0.08    1.40
  -3 -10   4   21.16    3.62
   3 -10  -4   27.00    3.87
   3  10  -4   27.89    2.17
   3  10  -4   26.38    2.20
  -3  10   4   28.56    2.15
  -3  10   4   24.98    2.10
  -2 -10   4   22.55    3.55
   2 -10  -4   17.97    3.58
   2  10  -4   18.38    1.72
  -2  10   4   16.25    1.53
   2  10  -4   22.51    1.93
  -2  10   4   17.76    1.65
   1 -10  -4  104.22    6.89
   1  10  -4  106.32    4.91
   1  10  -4  120.75    4.97
  -1  10   4  104.85    4.81
  -1  10   4   97.94    4.75
   0 -10  -4    1.75    3.10
   0  10  -4    1.39    1.30
   0  10  -4    1.01    1.26
   0  10   4    1.41    1.18
   0  10   4    1.13    1.02
   1  10   4    5.65    1.23
  -1  10  -4    8.74    1.57
   1  10   4   10.04    1.53
   2  10   4   14.64    1.69
   2  10   4   20.27    1.96
  -2  10  -4   15.12    1.94
  -3  10  -4    3.45    1.70
   3  10   4    2.85    1.71
   4  10   4   -0.94    1.77
  -4  10  -4    2.51    1.83
  -5  10  -4    2.57    1.96
   5  10   4    3.34    2.00
   6  10   4   10.08    2.36
  -6  10  -4   12.56    2.33
   7  10   4   -0.10    2.14
  -7  10  -4    2.73    2.13
   8  10   4    9.38    2.71
  -8  10  -4    6.50    2.50
   9  10   4    1.14    2.65
  -9  10  -4    5.41    2.55
  10  10   4    2.50    2.69
 -10  10  -4   -1.35    2.55
  11  10   4   -3.64    2.85
 -11  10  -4   -1.10    2.68
 -12  10  -4   -2.26    2.79
  12  10   4    4.31    3.40
  13  10   4    0.03    3.36
 -13  10  -4    0.08    3.17
  16  11  -4   -0.87    3.32
 -16  11   4   -3.64    3.02
  15  11  -4    3.68    3.47
 -15  11   4    2.24    3.16
  14  11  -4   -0.95    2.89
 -14  11   4    1.25    2.85
 -13  11   4    0.26    2.57
  13  11  -4   -2.68    2.76
  12  11  -4   30.35    3.84
 -12  11   4   28.92    3.62
 -11  11   4   13.43    2.85
  11  11  -4   15.28    3.09
 -10  11   4    0.57    2.25
  10  11  -4    5.81    2.47
   9  11  -4   20.02    2.78
  -9  11   4   16.10    2.64
   8  11  -4    1.32    2.02
  -8  11   4    1.06    1.98
   7  11  -4    4.21    1.99
  -7  11   4    8.94    2.06
   6 -11  -4   51.85    5.01
  -6  11   4   41.47    3.15
   6  11  -4   38.69    3.09
  -5 -11   4   31.21    4.02
   5 -11  -4   26.70    4.22
  -5  11   4   26.84    2.42
   5  11  -4   32.02    2.61
  -4 -11   4    8.16    3.28
   4 -11  -4    7.63    3.51
  -4  11   4    8.73    1.60
   4  11  -4   10.78    1.72
   3 -11  -4    6.44    3.50
  -3 -11   4    8.10    3.34
  -3  11   4    6.95    1.33
  -3  11   4    7.18    1.47
   3  11  -4    9.83    1.44
   3  11  -4   11.25    1.56
  -2 -11   4   16.17    3.81
   2 -11  -4   17.05    3.89
   2  11  -4   26.45    2.09
   2  11  -4   23.53    2.09
  -1 -11   4   13.37    3.71
   1 -11  -4   13.38    3.72
   1  11  -4   15.19    1.65
   1  11  -4   13.76    1.60
   0 -11  -4    8.94    3.45
   0  11  -4   11.89    1.63
   1  11   4   56.64    3.27
  -1  11  -4   62.41    3.40
  -2  11  -4   14.54    1.94
   2  11   4   11.33    1.86
  -3  11  -4    0.45    1.64
   3  11   4    3.14    1.78
   4  11   4    1.74    1.87
  -4  11  -4    2.20    1.83
  -5  11  -4    5.68    2.07
   5  11   4    5.96    2.20
   6  11   4    5.01    2.29
  -6  11  -4    6.34    2.20
  -7  11  -4    0.24    2.22
   7  11   4    1.31    2.24
   8  11   4   19.04    3.20
  -8  11  -4   16.56    2.88
  -9  11  -4   13.10    2.93
   9  11   4   10.49    3.08
  10  11   4   -3.96    2.70
 -10  11  -4   -0.96    2.59
  11  11   4    4.67    3.24
 -11  11  -4    4.46    3.06
  12  11   4   13.37    3.90
 -12  11  -4    9.28    3.41
  13  11   4    3.06    3.43
 -13  11  -4    3.70    3.29
 -15  12   4    7.08    3.36
  15  12  -4    6.43    3.68
  14  12  -4    5.87    3.33
 -14  12   4    5.18    3.07
 -13  12   4   -0.30    2.70
  13  12  -4    1.31    3.02
  12  12  -4    0.03    2.78
 -12  12   4    6.43    2.80
  11  12  -4    1.88    2.67
 -11  12   4    2.70    2.50
 -10  12   4    1.91    2.36
  10  12  -4    1.31    2.47
   9  12  -4    6.92    2.47
  -9  12   4   14.77    2.57
  -8  12   4   14.48    2.41
   8  12  -4    9.49    2.42
   7  12  -4   -1.13    1.87
  -7  12   4    0.21    1.89
   6 -12  -4   -1.95    3.55
   6  12  -4    0.72    1.76
  -6  12   4    3.03    1.78
  -5 -12   4    0.99    3.26
   5 -12  -4    5.14    3.68
  -5  12   4    8.27    1.81
   5  12  -4    9.90    1.85
  -4 -12   4   -2.78    3.23
   4 -12  -4   -1.76    3.51
   4  12  -4    1.13    1.51
  -4  12   4    1.34    1.43
   3 -12  -4    6.58    3.63
  -3 -12   4    3.10    3.43
   3  12  -4    4.12    1.51
   2 -12  -4   41.43    4.96
  -2 -12   4   44.32    4.91
   2  12  -4   44.78    2.77
   1 -12  -4   -3.77    3.35
  -1 -12   4   -7.06    3.23
   1  12  -4    0.00    1.32
   0 -12  -4    2.71    3.32
   0  12  -4   -0.19    1.38
  -1  12  -4   26.54    2.39
  -2  12  -4    3.05    1.66
   2  12   4    1.29    1.58
  -3  12  -4    2.02    1.78
   3  12   4    1.81    1.79
   4  12   4   -0.36    1.94
  -4  12  -4   -1.31    1.81
  -5  12  -4   -0.21    1.95
   5  12   4    9.15    2.28
   6  12   4   -1.61    2.26
  -6  12  -4    0.63    2.03
  -7  12  -4   -0.86    2.29
   7  12   4    3.87    2.57
  -8  12  -4   -3.13    2.39
   8  12   4   -1.48    2.69
  -9  12  -4    8.48    2.81
   9  12   4   16.09    3.37
 -10  12  -4    3.24    2.78
  10  12   4    6.83    3.36
 -11  12  -4    3.96    2.92
  11  12   4    1.30    3.32
 -12  12  -4    1.37    3.14
  12  12   4    3.67    3.60
  14  13  -4   -2.92    3.24
 -14  13   4    1.21    3.02
  13  13  -4    9.18    3.42
 -13  13   4    4.78    2.95
  12  13  -4    7.68    3.05
 -12  13   4    1.03    2.66
 -11  13   4   -0.20    2.53
  11  13  -4   -2.61    2.61
  10  13  -4    3.47    2.56
 -10  13   4    4.50    2.48
  -9  13   4    4.07    2.35
   9  13  -4   -1.92    2.31
  -8  13   4    2.25    2.18
   8  13  -4    3.17    2.28
   7 -13  -4    3.13    4.00
   7  13  -4    1.00    2.05
  -7  13   4    3.08    1.97
   6 -13  -4    0.08    3.78
   6  13  -4    2.31    1.86
  -6  13   4    1.12    1.78
   5 -13  -4   11.04    4.27
  -5 -13   4    1.37    3.55
  -5  13   4    2.47    1.67
   5  13  -4    1.63    1.72
  -4 -13   4   15.61    4.17
   4 -13  -4    7.61    3.96
   4  13  -4   12.62    1.86
  -4  13   4   12.21    1.76
  -3 -13   4   20.90    4.37
   3 -13  -4   29.62    4.68
   3  13  -4   30.11    2.35
   2 -13  -4    4.96    3.87
  -2 -13   4    0.28    3.60
   2  13  -4    3.38    1.33
  -1 -13   4   -0.62    3.56
   1 -13  -4   -1.62    3.65
   1  13  -4   -0.15    1.27
   0 -13  -4    6.48    3.74
   0 -13   4   11.31    4.16
   0  13  -4    8.87    1.58
  -1  13  -4    0.61    1.49
  -2  13  -4   10.92    1.89
   2  13   4   12.91    2.02
  -3  13  -4    1.01    1.82
   3  13   4    3.44    1.90
   4  13   4    1.36    2.05
  -4  13  -4   -0.55    1.93
  -5  13  -4    0.86    2.08
   5  13   4   -0.64    2.20
   6  13   4   11.69    2.62
  -6  13  -4    7.75    2.46
  -7  13  -4    3.29    2.46
   7  13   4    3.51    2.70
  -8  13  -4    4.38    2.61
   8  13   4    4.67    2.89
  -9  13  -4    3.07    2.74
   9  13   4    4.67    3.05
 -10  13  -4    2.59    2.91
  10  13   4    2.10    3.31
  11  13   4   -2.65    3.36
 -11  13  -4    0.97    3.10
  13  14  -4    2.42    3.39
 -13  14   4   11.29    3.14
  12  14  -4    0.06    3.16
 -12  14   4    1.16    2.71
 -11  14   4    9.91    2.85
  11  14  -4   16.09    3.36
  10  14  -4   -2.49    2.62
 -10  14   4    4.18    2.58
   9  14  -4    0.44    2.53
  -9  14   4    2.57    2.39
   8 -14  -4   -1.43    4.20
  -8  14   4   -3.20    2.04
   8  14  -4    2.68    2.32
   7 -14  -4   -0.89    4.18
  -7  14   4    3.57    2.07
   7  14  -4    2.47    2.17
   6 -14  -4   31.39    5.25
  -6  14   4   29.39    2.70
   6  14  -4   29.76    2.82
  -5 -14   4   -3.20    3.69
   5 -14  -4    5.48    4.23
   5  14  -4    4.59    1.93
  -5  14   4    3.49    1.71
  -4 -14   4   -1.36    3.96
   4 -14  -4   -2.81    4.02
   3 -14  -4   17.93    4.43
  -3 -14   4   11.30    4.22
  -2 -14   4   -2.08    3.90
   2 -14  -4   -0.05    4.07
   2  14  -4    1.00    1.34
   1 -14  -4    0.53    4.00
  -1 -14   4   -0.60    4.05
   0 -14  -4   -0.79    3.76
   0 -14   4    1.15    3.89
   0  14  -4   -1.49    1.40
   1 -14   4    6.75    4.37
  -1  14  -4    3.64    1.61
  -2  14  -4    3.41    1.81
   2  14   4    6.46    1.86
  -3  14  -4    1.54    1.89
   3  14   4    5.13    2.00
   4  14   4   -0.78    2.06
  -4  14  -4    0.40    2.03
  -5  14  -4    0.53    2.06
   5  14   4   -3.15    2.20
   6  14   4   18.05    3.06
  -6  14  -4   10.88    2.67
  -7  14  -4    5.64    2.58
   7  14   4    0.61    2.83
   8  14   4   -0.57    2.87
  -8  14  -4    0.84    2.62
   9  14   4   11.50    3.51
  -9  14  -4    7.98    2.98
  10  14   4   17.24    4.03
 -10  14  -4    6.60    3.25
  12  15  -4   -4.42    3.10
 -12  15   4    0.54    2.81
 -11  15   4    6.86    2.83
  11  15  -4   10.22    3.25
  10  15  -4    0.50    2.82
 -10  15   4    1.22    2.43
   9 -15  -4    7.30    4.78
   9  15  -4    3.02    2.72
  -9  15   4    5.51    2.48
   8 -15  -4    0.92    4.59
  -8  15   4   -2.46    2.07
   8  15  -4    2.55    2.45
   7 -15  -4    2.93    4.39
   7  15  -4    3.31    2.22
  -7  15   4   -2.33    1.98
   6 -15  -4   -3.86    4.38
   6  15  -4   -1.35    1.98
  -6  15   4   -2.31    1.77
  -5 -15   4   -0.27    3.97
   5 -15  -4    5.04    4.54
  -5  15   4    3.53    1.79
   5  15  -4    7.67    1.94
   4 -15  -4   37.02    5.68
  -4 -15   4   46.15    5.81
  -3 -15   4    5.47    4.38
   3 -15  -4   -7.07    4.27
  -2 -15   4    4.94    4.39
   2 -15  -4   -6.24    4.13
  -1 -15   4    4.48    4.37
   1 -15  -4    2.73    4.26
   0 -15   4    0.78    4.35
   0 -15  -4   -2.94    3.99
   0  15  -4   -0.33    1.44
   1 -15   4   10.55    4.55
  -1  15  -4    7.36    1.69
  -2  15  -4    3.04    1.76
  -3  15  -4   -1.05    1.89
   3  15   4    0.67    2.02
   4  15   4    2.26    2.20
  -4  15  -4    3.02    2.14
   5  15   4    3.75    2.51
  -5  15  -4   -1.16    2.16
  -6  15  -4    0.76    2.35
   6  15   4    0.63    2.62
   7  15   4    2.70    2.86
  -7  15  -4    2.15    2.57
   8  15   4    7.54    3.29
  -8  15  -4    2.73    2.75
  -9  15  -4    0.21    2.98
   9  15   4    0.14    3.34
  10 -16  -4    3.12    5.01
  10  16  -4   -0.56    2.85
 -10  16   4    2.81    2.55
   9 -16  -4   -6.80    4.52
  -9  16   4    2.71    2.40
   9  16  -4   -2.08    2.63
   8 -16  -4    1.70    4.66
   8  16  -4    5.87    2.61
  -8  16   4   -0.02    2.25
   7 -16  -4   -3.75    4.77
   7  16  -4   -2.88    2.28
  -7  16   4    2.95    2.08
   6 -16  -4   10.93    4.98
  -6  16   4    4.50    2.03
   5 -16  -4   -3.68    4.42
  -5 -16   4    0.49    4.30
   4 -16  -4   -2.38    4.57
  -4 -16   4   -1.76    4.39
  -3 -16   4   -4.24    4.44
   3 -16  -4  -12.48    4.36
  -2 -16   4    3.21    4.58
   2 -16  -4   -4.09    4.51
  -1 -16   4   -2.90    4.52
   1 -16  -4    3.53    4.53
   0 -16   4    5.00    4.86
   1 -16   4    4.14    4.67
  -1  16  -4   -0.08    1.62
   2 -16   4   -7.01    4.59
  -2  16  -4   -0.27    1.76
  -3  16  -4    0.49    1.99
  -4  16  -4    0.10    2.17
   4  16   4    1.93    2.30
  -5  16  -4   -4.12    2.18
   5  16   4    0.68    2.55
   6  16   4    1.14    2.74
  -6  16  -4    1.72    2.46
   7  16   4   -2.76    3.09
  -7  16  -4   -2.74    2.41
   9 -17  -4   14.33    5.63
  -9  17   4    5.36    2.57
   8 -17  -4    5.43    5.35
   8  17  -4    6.35    2.75
  -8  17   4    2.10    2.27
   7 -17  -4    7.85    5.32
  -7  17   4    0.82    2.09
   6 -17  -4   -2.51    5.04
   5 -17  -4   -0.36    4.84
  -5 -17   4   -5.58    4.35
  -4 -17   4    1.86    4.74
   4 -17  -4    2.63    4.99
  -3 -17   4   -2.75    4.84
   3 -17  -4    1.41    5.08
  -2 -17   4    0.94    4.76
   2 -17  -4   -3.39    4.78
   1 -17  -4   12.73    5.31
  -1 -17   4    5.67    5.15
   0 -17   4   19.62    5.69
   1 -17   4   -9.21    4.75
   2 -17   4    1.74    4.93
  -2  17  -4   -0.10    1.76
   3 -17   4    4.39    5.31
  -3  17  -4    0.47    1.99
  -4  17  -4    0.69    2.17
   5  17   4    3.62    2.63
  -5  17  -4    1.29    2.31
   6 -18  -4   -1.22    5.14
   5 -18  -4    1.16    5.42
  -4 -18   4   -7.33    4.84
   4 -18  -4   -3.22    5.28
  -3 -18   4    6.35    5.35
   3 -18  -4    0.31    5.32
   2 -18  -4    1.45    5.23
  -2 -18   4    2.42    5.33
   1 -18  -4    3.15    5.14
  -1 -18   4    8.14    5.40
   0 -18   4    4.40    5.42
   1 -18   4    3.74    5.49
   2 -18   4   13.99    5.92
  20   0  -5   -5.82    3.10
 -20   0   5    4.01    3.65
 -19   0   5   -6.05    3.13
  19   0  -5    0.69    3.31
  18   0  -5   -1.36    3.01
 -18   0   5   -0.87    3.25
  17   0  -5   -2.44    2.67
 -17   0   5   -2.21    2.94
  16   0  -5    0.57    2.73
 -16   0   5    3.64    2.93
  15   0  -5    3.18    2.66
 -15   0   5   -0.43    2.63
  14   0  -5   -0.32    2.41
 -14   0   5   -0.27    2.52
 -13   0   5    1.30    2.45
  13   0  -5   -0.14    2.22
 -12   0   5    2.29    2.31
  12   0  -5   -1.80    1.90
 -11   0   5    4.47    2.13
  11   0  -5   -0.15    1.80
 -10   0   5   -0.81    1.80
  10   0  -5    0.05    1.68
  -9   0   5   -0.76    1.69
   9   0  -5   -0.70    1.68
   8   0  -5    0.71    1.51
  -8   0   5    0.41    1.65
   7   0  -5   -0.83    1.50
  -7   0   5    0.53    1.56
  -6   0   5    0.41    1.49
   6   0  -5   -1.27    1.40
  -5   0   5   -1.66    1.35
   5   0  -5    1.16    1.40
  -4   0   5   -1.93    1.32
   4   0  -5    0.72    1.34
   3   0  -5    0.16    1.29
  -3   0   5    2.40    1.28
  -2   0   5    1.48    1.20
   2   0  -5   -0.29    1.23
  -1   0   5   -1.58    1.14
   1   0  -5   -1.55    1.26
   0   0  -5    0.69    1.33
   0   0   5    0.59    1.29
  -1   0  -5   -0.74    1.36
   1   0   5   -1.16    1.23
  -2   0  -5    1.17    1.48
   2   0   5   -0.90    1.28
  -3   0  -5    0.79    1.60
   3   0   5    0.95    1.39
  -4   0  -5   -0.66    1.62
   4   0   5   -0.63    1.41
  -5   0  -5   -0.36    1.62
   5   0   5   -0.39    1.55
  -6   0  -5   -1.14    1.70
   6   0   5    0.96    1.68
   7   0   5    0.11    1.72
  -7   0  -5   -0.88    1.99
   8   0   5    0.61    1.89
  -8   0  -5    1.47    2.25
   9   0   5    1.51    2.23
  -9   0  -5   -2.25    2.24
  10   0   5    0.88    2.29
 -10   0  -5   -1.75    2.42
 -11   0  -5    5.56    2.76
  11   0   5   -1.13    2.38
  12   0   5    3.34    2.91
 -12   0  -5    3.88    3.04
 -13   0  -5    1.08    3.25
  13   0   5   -0.90    2.88
 -14   0  -5    1.95    3.35
  14   0   5   -8.22    2.57
 -15   0  -5   -0.46    3.43
  15   0   5   -1.72    3.27
  16   0   5    6.36    3.68
 -16   0  -5   -3.03    3.34
  20  -1  -5   23.96    4.54
 -20  -1   5   14.63    4.04
 -20   1   5   13.29    4.10
  20   1  -5   21.49    4.56
  19  -1  -5    9.86    3.77
 -19  -1   5   17.18    4.00
  19   1  -5   14.52    4.03
 -19   1   5   14.92    4.01
 -18  -1   5    6.21    3.35
  18  -1  -5    3.29    3.21
 -18   1   5   -0.84    3.20
  18   1  -5    4.08    3.38
 -17  -1   5    9.99    3.46
  17  -1  -5    3.10    3.11
 -17   1   5   15.99    3.61
  17   1  -5   10.93    3.40
  16  -1  -5    4.13    2.85
 -16  -1   5    2.31    2.94
 -16   1   5    1.72    2.85
  16   1  -5    1.50    2.83
  15  -1  -5    0.87    2.54
 -15  -1   5    1.69    2.65
  15   1  -5    2.45    2.69
 -15   1   5    1.24    2.70
  14  -1  -5    5.99    2.54
 -14  -1   5    3.25    2.61
  14   1  -5    0.23    2.42
 -14   1   5    2.53    2.52
  13  -1  -5   -1.96    2.04
 -13  -1   5    2.14    2.37
  13   1  -5   -1.11    2.24
 -13   1   5    0.73    2.34
  12  -1  -5   24.96    3.05
 -12  -1   5   24.80    3.07
 -12   1   5   20.73    3.03
  12   1  -5   23.88    3.09
 -11  -1   5    6.44    2.25
  11  -1  -5    7.19    2.22
  11   1  -5    6.05    2.15
 -11   1   5    4.53    2.16
  10  -1  -5    5.14    1.96
 -10  -1   5    1.75    1.99
 -10   1   5    2.25    1.99
  10   1  -5    0.05    1.72
  -9  -1   5    5.90    1.86
   9  -1  -5    1.86    1.69
  -9   1   5    4.75    1.86
   9   1  -5    4.01    1.79
  -8  -1   5   69.86    4.06
   8  -1  -5   63.36    3.97
  -8   1   5   69.21    4.02
   8   1  -5   73.70    4.09
  -7  -1   5   48.94    3.22
   7  -1  -5   47.81    3.28
   7   1  -5   53.17    3.32
  -7   1   5   48.70    3.30
  -6  -1   5    1.35    1.53
   6  -1  -5    1.34    1.45
   6   1  -5    0.62    1.41
  -6   1   5    2.24    1.55
   5  -1  -5    4.03    1.49
  -5  -1   5    1.38    1.44
  -5   1   5    4.21    1.46
   5   1  -5    2.70    1.45
   4  -1  -5   56.61    3.28
  -4  -1   5   55.82    3.31
   4   1  -5   60.34    3.38
  -4   1   5   58.62    3.28
  -3  -1   5  148.77    6.57
   3  -1  -5  150.56    6.62
   3   1  -5  148.78    6.60
  -3   1   5  149.32    6.60
   2  -1  -5    7.16    1.45
  -2  -1   5    6.46    1.38
   2   1  -5    4.34    1.39
  -2   1   5    6.47    1.34
  -1  -1   5    8.30    1.44
   1  -1  -5    9.72    1.54
  -1   1   5    8.83    1.47
   1   1  -5    7.20    1.50
   0  -1   5   14.06    1.62
   0  -1  -5   11.76    1.64
   0   1  -5   12.76    1.70
   0   1   5   15.02    1.66
  -1  -1  -5   16.14    1.89
   1  -1   5   19.75    1.89
  -1   1  -5   18.45    1.92
   1   1   5   19.96    1.97
   2  -1   5   15.04    1.82
  -2  -1  -5   15.64    1.91
  -2   1  -5   18.79    2.03
   2   1   5   15.71    1.81
  -3  -1  -5   12.50    1.93
   3  -1   5   12.41    1.79
  -3   1  -5   14.06    1.90
   3   1   5    9.64    1.75
   4  -1   5  267.87   11.12
  -4  -1  -5  247.74   11.09
   4   1   5  254.08   11.14
  -4   1  -5  257.56   11.17
   5  -1   5   70.07    3.98
  -5  -1  -5   66.37    4.01
  -5   1  -5   69.30    4.15
   5   1   5   63.42    3.98
  -6  -1  -5    2.43    1.97
   6  -1   5    3.09    1.78
   6   1   5    2.61    1.69
  -6   1  -5   -0.66    1.82
  -7  -1  -5    2.70    2.17
   7  -1   5    2.51    1.78
  -7   1  -5    2.88    2.12
   7   1   5    3.79    1.96
   8  -1   5   46.06    3.67
  -8  -1  -5   43.36    3.85
  -8   1  -5   40.76    3.76
   8   1   5   42.44    3.66
  -9  -1  -5    6.29    2.52
   9  -1   5    0.36    2.22
   9   1   5    2.16    2.25
  -9   1  -5    5.44    2.60
 -10  -1  -5    7.98    2.85
  10  -1   5    4.28    2.47
 -10   1  -5    4.94    2.69
  10   1   5    6.73    2.50
 -11  -1  -5    2.91    2.82
  11  -1   5    7.54    2.75
  11   1   5    2.52    2.45
 -11   1  -5    1.36    2.82
 -12  -1  -5   17.24    3.61
  12  -1   5   23.57    3.69
 -12   1  -5   21.83    3.77
  12   1   5   16.04    3.48
 -13  -1  -5    1.63    3.10
  13  -1   5    3.60    2.99
  13   1   5   -2.52    2.89
 -13   1  -5   -1.87    2.95
 -14  -1  -5    6.81    3.49
  14  -1   5   -1.94    2.83
  14   1   5    4.13    3.24
 -14   1  -5    0.06    3.21
  15  -1   5    2.57    3.22
 -15  -1  -5   -1.84    3.31
 -15   1  -5    6.50    3.55
  15   1   5    2.92    3.18
  16  -1   5   11.95    3.87
  16   1   5   10.93    3.89
  20  -2  -5   -0.81    3.37
 -20  -2   5    2.99    3.38
  20   2  -5   -2.09    3.39
 -20   2   5   -1.27    3.57
 -19  -2   5   -1.53    3.10
  19  -2  -5    1.82    3.35
  19   2  -5   -0.53    3.47
 -19   2   5   -2.79    3.35
 -18  -2   5   24.67    4.20
  18  -2  -5   31.10    4.32
 -18   2   5   32.75    4.59
  18   2  -5   24.86    4.38
  17  -2  -5   -0.58    2.84
 -17  -2   5    4.22    2.90
 -17   2   5    1.85    3.11
  17   2  -5   -1.19    2.95
 -16  -2   5    6.80    3.19
  16  -2  -5    7.52    2.98
 -16   2   5    2.89    3.06
  16   2  -5    7.86    3.06
 -15  -2   5   60.04    4.88
  15  -2  -5   64.60    4.92
 -15   2   5   60.31    5.08
  15   2  -5   68.05    5.13
  14  -2  -5    7.73    2.63
 -14  -2   5   -0.96    2.43
 -14   2   5    4.23    2.69
  14   2  -5    9.56    2.82
 -13  -2   5    5.04    2.56
  13  -2  -5   10.85    2.72
 -13   2   5    9.38    2.68
  13   2  -5   13.09    2.74
  12  -2  -5    0.91    2.06
 -12  -2   5    1.59    2.27
  12   2  -5    1.20    2.09
 -12   2   5    2.94    2.31
  11  -2  -5    1.54    1.94
 -11  -2   5   -0.23    2.03
 -11   2   5    3.55    2.11
  11   2  -5    1.24    1.99
  10  -2  -5    1.51    1.82
 -10  -2   5    6.84    2.08
  10   2  -5    5.12    1.94
 -10   2   5    6.41    2.05
  -9  -2   5    1.65    1.77
   9  -2  -5    3.10    1.79
   9   2  -5    2.49    1.70
  -9   2   5    1.84    1.81
   8  -2  -5   15.70    2.09
  -8  -2   5   15.05    2.15
   8   2  -5   13.93    2.11
  -8   2   5   14.91    2.18
  -7  -2   5   90.58    4.75
   7  -2  -5   89.99    4.73
  -7   2   5  100.92    4.87
   7   2  -5   90.25    4.71
  -6  -2   5   60.62    3.54
   6  -2  -5   59.51    3.49
  -6   2   5   60.81    3.53
   6   2  -5   56.88    3.50
   5  -2  -5   -0.45    1.38
  -5  -2   5    2.19    1.42
   5   2  -5   -1.31    1.30
  -5   2   5    0.62    1.37
   4  -2  -5   11.92    1.57
  -4  -2   5    8.91    1.53
   4  -2  -5    9.08    1.61
  -4   2   5   11.96    1.59
   4   2  -5    6.98    1.49
  -3  -2   5    9.10    1.45
   3  -2  -5   11.76    1.59
  -3   2   5   12.27    1.51
   3   2  -5   10.30    1.53
   2  -2  -5   19.57    1.87
  -2  -2   5   21.89    1.83
  -2   2   5   23.18    1.80
   2   2  -5   18.74    1.79
  -1  -2   5   12.77    1.57
   1  -2  -5   12.90    1.64
  -1   2   5   13.92    1.56
   1   2  -5   12.15    1.55
   0  -2  -5    3.36    1.42
   0   2   5    6.07    1.34
   0   2  -5    3.34    1.42
  -1  -2  -5   21.05    1.94
   1  -2   5   18.94    1.81
   1   2   5   19.83    1.86
  -1   2  -5   20.41    1.96
  -2  -2  -5    0.14    1.49
   2  -2   5   -0.18    1.30
   2   2   5   -1.89    1.23
  -2   2  -5    1.63    1.46
   3  -2   5   56.50    3.34
  -3  -2  -5   53.92    3.39
  -3   2  -5   54.95    3.38
   3   2   5   53.40    3.37
  -4  -2  -5   44.77    3.09
   4  -2   5   39.07    2.85
   4   2   5   40.86    2.97
  -4   2  -5   38.65    3.05
   5  -2   5    1.85    1.58
  -5  -2  -5    4.66    1.80
  -5   2  -5    2.95    1.75
   5   2   5    4.22    1.68
  -6  -2  -5    8.56    2.21
   6  -2   5    9.78    1.93
  -6   2  -5    3.11    2.02
   6   2   5    7.30    1.97
  -7  -2  -5    4.30    2.21
   7  -2   5    4.45    1.95
  -7   2  -5    6.06    2.16
   7   2   5    4.36    1.97
  -8  -2  -5    5.47    2.33
   8  -2   5    5.30    2.06
  -8   2  -5    3.85    2.30
   8   2   5    3.90    2.09
   9  -2   5    5.22    2.26
  -9  -2  -5    4.59    2.52
   9   2   5    3.90    2.30
  -9   2  -5    6.12    2.56
  10  -2   5   37.43    3.74
 -10  -2  -5   39.38    3.97
  10   2   5   38.63    3.88
 -10   2  -5   33.33    3.79
  11  -2   5    2.31    2.53
 -11  -2  -5   -1.74    2.66
  11   2   5    2.89    2.64
 -11   2  -5   -0.45    2.72
  12  -2   5   -0.11    2.51
 -12  -2  -5   -3.21    2.78
  12   2   5   -3.19    2.50
 -12   2  -5    2.12    3.04
  13  -2   5   10.91    3.20
 -13  -2  -5    6.76    3.32
 -13   2  -5    9.85    3.54
  13   2   5    9.51    3.33
 -14  -2  -5    9.17    3.61
  14  -2   5   14.43    3.54
 -14   2  -5   13.10    3.79
  14   2   5   13.68    3.81
 -15  -2  -5   11.05    3.81
  15  -2   5   21.11    3.96
  15   2   5    9.25    3.74
 -15   2  -5   21.75    4.15
  20  -3  -5   11.94    3.90
 -20   3   5    5.59    3.94
  20   3  -5    3.54    3.95
  19  -3  -5    4.96    3.34
 -19  -3   5    5.40    3.09
  19   3  -5   -2.88    3.30
 -19   3   5    1.20    3.54
 -18  -3   5    3.85    3.05
  18  -3  -5    6.56    3.23
  18   3  -5    1.60    3.27
 -18   3   5    3.81    3.50
 -17  -3   5    5.42    3.12
  17  -3  -5    2.67    3.02
 -17   3   5    3.38    3.15
  17   3  -5    2.42    3.17
 -16  -3   5    4.08    2.77
  16  -3  -5   -1.61    2.64
 -16   3   5    1.09    2.85
  16   3  -5   -2.66    2.72
  15  -3  -5    0.39    2.48
 -15  -3   5   -1.68    2.48
  15   3  -5    3.37    2.71
 -15   3   5   -1.29    2.65
 -14  -3   5    0.41    2.48
  14  -3  -5    2.64    2.45
  14   3  -5   -0.96    2.43
 -14   3   5    2.70    2.57
  13  -3  -5    7.81    2.51
 -13  -3   5   11.28    2.63
 -13   3   5    3.59    2.55
  13   3  -5    6.64    2.59
  12  -3  -5   32.81    3.34
 -12  -3   5   34.61    3.35
 -12   3   5   28.24    3.33
  12   3  -5   28.91    3.32
  11  -3  -5   20.36    2.68
 -11  -3   5   19.96    2.66
 -11   3   5   19.09    2.76
  11   3  -5   20.37    2.80
 -10  -3   5   17.14    2.44
  10  -3  -5   16.20    2.35
  10   3  -5   14.48    2.40
 -10   3   5   16.08    2.50
  -9  -3   5    4.09    1.79
   9  -3  -5   -0.78    1.56
   9   3  -5    2.18    1.64
  -9   3   5   -2.83    1.63
  -8  -3   5    8.19    1.81
   8  -3  -5    5.61    1.71
   8   3  -5    5.89    1.79
  -8   3   5    5.18    1.79
  -7  -3   5    2.23    1.59
   7  -3  -5    1.77    1.45
  -7   3   5    4.15    1.62
   7   3  -5    3.80    1.58
  -6  -3   5    6.11    1.59
   6  -3  -5    6.12    1.61
  -6   3   5    5.75    1.58
   6   3  -5    5.79    1.58
   5  -3  -5   31.09    2.39
  -5  -3   5   29.20    2.47
   5   3  -5   29.33    2.31
  -5   3   5   32.55    2.57
  -4  -3   5    1.45    1.31
   4  -3  -5    3.10    1.32
  -4  -3   5    4.36    1.35
   4  -3  -5    0.81    1.61
  -4   3   5    1.36    1.28
   4   3  -5    2.04    1.34
  -3  -3   5    4.34    1.32
   3  -3  -5    3.34    1.33
   3  -3  -5    3.83    1.77
  -3   3   5    6.57    1.37
   3   3  -5    5.26    1.36
   2  -3  -5    5.26    1.36
  -2  -3   5    6.24    1.32
   2   3  -5    5.10    1.34
  -2   3   5    7.28    1.33
   1  -3  -5   12.92    1.58
  -1  -3   5   10.12    1.46
   1   3  -5   13.16    1.61
  -1   3   5   14.74    1.59
   0  -3   5   -1.49    1.16
   0  -3  -5    1.05    1.26
   0   3   5    0.36    1.17
   0   3  -5   -1.13    1.24
  -1  -3  -5   13.75    1.70
   1  -3   5   11.46    1.60
  -1   3  -5   15.52    1.78
   1   3   5   15.32    1.71
   2  -3   5   49.96    3.06
  -2  -3  -5   49.36    3.13
  -2   3  -5   52.58    3.19
   2   3   5   50.13    3.13
   3  -3   5    0.05    1.29
  -3  -3  -5    1.78    1.53
  -3   3  -5   -2.11    1.41
   3   3   5    2.25    1.43
  -4  -3  -5   34.86    2.79
   4  -3   5   37.99    2.76
   4   3   5   33.04    2.85
  -4   3  -5   35.56    2.96
  -5  -3  -5   24.57    2.57
   5  -3   5   25.33    2.42
   5   3   5   25.70    2.54
  -5   3  -5   23.07    2.55
   6  -3   5    3.48    1.65
  -6  -3  -5    3.64    1.96
  -6   3  -5    1.17    1.88
   6   3   5    3.23    1.73
  -7  -3  -5    3.47    2.15
   7  -3   5    4.45    1.97
  -7   3  -5    3.34    2.08
   7   3   5    6.36    2.01
  -8  -3  -5    3.18    2.26
   8  -3   5   -1.38    1.91
   8   3   5   -1.03    1.88
  -8   3  -5    0.65    2.26
   9  -3   5   45.55    3.71
  -9  -3  -5   38.06    3.79
  -9   3  -5   38.82    3.86
   9   3   5   36.19    3.64
  10  -3   5    2.03    2.34
 -10  -3  -5    5.82    2.62
 -10   3  -5   -0.08    2.53
  10   3   5    1.57    2.44
  11  -3   5   14.84    3.00
 -11  -3  -5    9.68    2.89
 -11   3  -5    5.92    2.91
  11   3   5    6.44    2.76
  12  -3   5    4.61    2.84
 -12  -3  -5    4.63    3.02
 -12   3  -5    4.15    3.15
  12   3   5    2.38    2.82
 -13  -3  -5    2.90    3.02
  13  -3   5    2.98    2.90
  13   3   5    0.35    2.95
 -13   3  -5   -2.20    3.09
 -14  -3  -5    3.08    2.95
  14  -3   5   -2.11    2.78
 -14   3  -5   -1.96    3.19
  14   3   5    7.41    3.54
  15  -3   5   -0.74    2.98
  15   3   5    0.38    3.28
 -15   3  -5    2.38    3.58
  19  -4  -5   -0.30    3.13
  19   4  -5    3.75    3.55
 -19   4   5    4.68    3.60
  18  -4  -5    4.91    3.25
  18   4  -5   13.21    3.81
 -18   4   5    4.95    3.48
 -17  -4   5    0.53    2.45
  17  -4  -5    7.61    3.00
 -17   4   5    5.27    3.40
  17   4  -5    5.02    3.21
  16  -4  -5   -0.40    2.51
 -16  -4   5    0.56    2.39
  16   4  -5    3.29    2.87
 -16   4   5   -5.58    2.56
 -15  -4   5    7.07    2.49
  15  -4  -5    4.96    2.60
 -15   4   5    3.54    2.79
  15   4  -5    3.12    2.73
 -14  -4   5    3.71    2.43
  14  -4  -5   -1.43    2.18
 -14   4   5   -0.27    2.43
  14   4  -5    1.22    2.55
 -13  -4   5   21.32    3.02
  13  -4  -5   21.38    2.98
 -13   4   5   23.24    3.23
  13   4  -5   16.74    3.09
 -12  -4   5    7.83    2.43
  12  -4  -5    7.36    2.35
  12   4  -5    4.90    2.34
 -12   4   5    6.36    2.45
 -11  -4   5    3.72    2.16
  11  -4  -5    3.48    1.99
  11   4  -5    6.55    2.27
 -11   4   5    5.99    2.23
 -10  -4   5    9.73    2.14
  10  -4  -5    6.59    1.95
  10   4  -5    4.85    2.10
 -10   4   5    8.71    2.12
  -9  -4   5    9.70    2.01
   9  -4  -5   10.90    1.94
  -9   4   5    9.43    2.11
   9   4  -5    9.12    2.01
   8  -4  -5   38.19    2.94
  -8  -4   5   43.46    2.95
  -8   4   5   40.78    3.15
   8   4  -5   40.58    3.18
  -7  -4   5   19.69    2.15
   7  -4  -5   24.43    2.25
   7   4  -5   23.09    2.23
  -7   4   5   21.23    2.24
  -6  -4   5   15.80    1.88
   6  -4  -5   20.23    1.99
   6   4  -5   18.57    1.97
  -6   4   5   18.88    2.05
  -5  -4   5    1.96    1.34
   5  -4  -5    2.88    1.38
  -5  -4   5    1.74    1.58
  -5   4   5    2.54    1.38
   5   4  -5    2.98    1.40
  -4  -4   5    8.80    1.41
   4  -4  -5   10.13    1.50
  -4  -4   5    9.51    1.73
   4  -4  -5    9.51    2.04
   4   4  -5    7.67    1.52
  -4   4   5   12.52    1.53
   3  -4  -5    2.07    1.23
   3  -4  -5    4.20    1.92
  -3  -4   5    0.77    1.15
  -3   4   5    2.97    1.24
   3   4  -5    1.05    1.22
  -3   4   5    2.79    1.21
   2  -4  -5    1.29    1.84
  -2  -4   5   -1.05    1.10
   2  -4  -5   -1.28    1.15
  -2   4   5   -0.40    1.11
   2   4  -5    0.74    1.18
  -2   4   5   -1.68    1.08
   1  -4  -5    2.98    1.22
  -1  -4   5    4.00    1.17
  -1   4   5    1.36    1.15
  -1   4   5    2.95    1.19
   1   4  -5    5.24    1.32
   0  -4   5   50.42    2.84
   0  -4  -5   48.95    2.83
   0   4  -5   56.18    3.04
   0   4   5   44.93    2.95
   1  -4   5    0.23    1.16
  -1  -4  -5    2.61    1.30
   1   4   5   -1.04    1.25
  -1   4  -5    1.40    1.33
  -2  -4  -5  160.58    7.32
   2  -4   5  168.64    7.31
  -2   4  -5  168.41    7.43
  -3  -4  -5    1.91    1.42
   3  -4   5   -0.35    1.24
  -3   4  -5    2.08    1.51
   3   4   5    0.64    1.33
   4  -4   5   26.37    2.30
  -4  -4  -5   26.61    2.49
   4   4   5   28.09    2.50
  -4   4  -5   24.30    2.53
   5  -4   5   14.08    1.94
  -5  -4  -5   13.31    2.16
  -5   4  -5   13.57    2.16
   5   4   5   15.09    2.18
   6  -4   5    3.94    1.72
  -6  -4  -5    2.00    1.88
   6   4   5    3.15    1.77
  -6   4  -5    1.81    1.90
  -7  -4  -5    6.12    2.25
   7  -4   5    5.76    1.99
   7   4   5    6.69    2.10
  -7   4  -5    7.57    2.18
  -8  -4  -5   10.65    2.56
   8  -4   5   12.66    2.35
  -8   4  -5    8.54    2.58
   8   4   5    9.15    2.42
   9  -4   5   25.63    3.05
  -9  -4  -5   21.08    3.08
   9   4   5   19.28    2.95
  -9   4  -5   21.84    3.14
  10  -4   5   11.92    2.68
 -10  -4  -5   13.88    2.85
 -10   4  -5   18.17    3.09
  10   4   5   10.08    2.81
 -11  -4  -5    5.78    2.61
  11  -4   5    4.55    2.51
 -11   4  -5    3.96    2.80
  11   4   5    3.19    2.67
 -12  -4  -5    1.56    2.53
  12  -4   5   -2.66    2.56
 -12   4  -5    4.39    3.04
  12   4   5   -1.78    2.65
  13  -4   5   -0.77    2.62
  13   4   5    5.25    3.24
 -13   4  -5    1.45    3.10
  14  -4   5    4.44    3.01
 -14   4  -5    3.83    3.44
  14   4   5    5.28    3.52
  15  -4   5    3.63    3.23
 -15   4  -5    0.77    3.53
  15   4   5    2.00    3.41
 -19   5   5   14.76    4.06
  19   5  -5   14.18    4.15
  18   5  -5   -2.14    3.10
 -18   5   5   -0.45    3.10
  17  -5  -5    2.94    2.54
  17   5  -5   -1.97    3.08
 -17   5   5    6.06    3.36
  16  -5  -5   25.57    3.39
 -16  -5   5   12.53    2.85
 -16   5   5   16.34    3.58
  16   5  -5   21.75    3.86
  15  -5  -5   -2.51    2.16
 -15  -5   5   -1.70    1.98
  15   5  -5   -2.85    2.67
 -15   5   5   -0.82    2.71
 -14  -5   5   -2.09    1.92
  14  -5  -5    4.05    2.28
  14   5  -5    3.68    2.60
 -14   5   5   -5.80    2.30
  13  -5  -5   15.49    2.68
 -13  -5   5    8.90    2.39
  13   5  -5   14.21    2.87
 -13   5   5   13.24    2.91
  12  -5  -5   33.81    3.30
 -12  -5   5   36.63    3.38
  12   5  -5   27.55    3.45
 -12   5   5   32.41    3.49
 -11  -5   5   36.79    3.30
  11  -5  -5   37.46    3.26
  11   5  -5   38.16    3.53
 -11   5   5   42.32    3.62
 -10  -5   5    3.98    1.90
  10  -5  -5    3.58    1.80
 -10   5   5   -0.20    1.90
  10   5  -5    0.98    1.85
  -9  -5   5    0.65    1.66
   9  -5  -5   -1.07    1.54
  -9   5   5    0.12    1.86
   9   5  -5    0.53    1.76
   8  -5  -5   50.79    3.26
  -8  -5   5   49.51    3.33
  -8   5   5   51.12    3.51
   8   5  -5   52.09    3.46
   7  -5  -5   28.71    2.47
  -7  -5   5   27.50    2.35
   7   5  -5   28.55    2.50
  -7   5   5   30.97    2.56
   6  -5  -5   24.49    2.06
  -6  -5   5   21.17    2.00
   6   5  -5   23.67    2.18
  -6   5   5   27.66    2.44
   5  -5  -5    1.85    1.25
  -5  -5   5    3.32    1.80
  -5  -5   5    0.77    1.23
  -5   5   5    2.47    1.37
   5   5  -5    2.30    1.36
  -4  -5   5    3.51    1.19
  -4  -5   5    4.02    1.87
   4  -5  -5    3.78    1.24
   4  -5  -5    3.00    2.09
   4   5  -5    4.29    1.28
  -4   5   5    3.98    1.33
   4   5  -5    5.78    1.43
  -4   5   5    4.45    1.27
   3  -5  -5    6.05    1.20
   3  -5  -5    5.98    2.13
  -3  -5   5    6.61    1.21
  -3   5   5    9.68    1.35
   3   5  -5    7.51    1.38
   3   5  -5    7.59    1.31
  -3   5   5    7.51    1.37
   2  -5  -5    6.65    1.11
   2  -5  -5    6.82    2.22
  -2   5   5    7.53    1.32
  -2   5   5    8.71    1.34
   2   5  -5    8.30    1.41
   2   5  -5    9.82    1.41
   1  -5  -5    3.88    1.03
  -1  -5   5    2.21    1.02
   1   5  -5    3.24    1.25
  -1   5   5    2.68    1.17
   1   5  -5    2.20    1.17
  -1   5   5    3.30    1.17
   0  -5   5    5.07    1.14
   0  -5  -5    3.50    1.18
   0   5   5    4.63    1.23
   0   5   5    3.73    1.26
   0   5  -5    2.41    1.31
  -1  -5  -5   47.22    2.76
   1  -5   5   49.33    2.74
   1   5   5   45.57    3.02
  -1   5  -5   48.83    2.99
  -2  -5  -5    6.28    1.44
   2  -5   5    7.73    1.33
  -2   5  -5    5.33    1.55
  -3  -5  -5    0.94    1.41
   3  -5   5   -0.20    1.20
   3   5   5   -0.40    1.36
  -3   5  -5    1.12    1.47
  -4  -5  -5   31.57    2.60
   4  -5   5   28.25    2.46
   4   5   5   31.38    2.68
  -4   5  -5   30.22    2.68
  -5  -5  -5    5.06    1.77
   5  -5   5    2.98    1.57
  -5   5  -5    3.42    1.83
   5   5   5    5.48    1.84
  -6  -5  -5   32.51    2.95
   6  -5   5   31.42    2.74
   6   5   5   25.83    2.91
  -6   5  -5   32.42    3.00
   7  -5   5    2.74    1.71
  -7  -5  -5    0.33    1.94
   7   5   5   -1.41    1.80
  -7   5  -5    0.76    2.05
   8  -5   5   27.32    2.98
  -8  -5  -5   28.58    3.20
   8   5   5   25.54    3.15
  -8   5  -5   32.94    3.36
   9  -5   5   54.82    4.07
  -9  -5  -5   55.57    4.08
  -9   5  -5   58.58    4.58
   9   5   5   50.64    4.33
  10  -5   5    2.14    2.19
 -10  -5  -5    5.91    2.25
 -10   5  -5    7.62    2.78
  10   5   5    1.05    2.43
 -11  -5  -5    4.61    2.43
  11  -5   5    3.57    2.41
  11   5   5    1.71    2.71
 -11   5  -5    6.70    2.80
  12  -5   5   16.35    3.02
  12   5   5   12.45    3.36
 -12   5  -5   11.52    3.39
  13  -5   5   -0.22    2.51
 -13   5  -5    5.67    3.31
  13   5   5    1.59    3.06
  14   5   5   16.83    4.05
 -14   5  -5   12.01    3.79
 -15   5  -5    7.20    3.84
  15   5   5    9.62    3.96
 -19   6   5   -1.39    3.38
  19   6  -5    4.08    3.73
 -18   6   5   21.03    4.30
  18   6  -5   28.68    4.62
  17   6  -5    1.55    3.05
 -17   6   5   -4.44    2.98
  16   6  -5   -1.16    2.93
 -16   6   5   -0.60    2.82
  15  -6  -5   19.87    2.85
  15   6  -5   18.88    3.51
 -15   6   5   18.61    3.44
 -14  -6   5    3.13    2.10
  14  -6  -5    3.03    2.13
  14   6  -5    8.04    2.87
 -14   6   5    2.20    2.65
  13  -6  -5    0.77    1.90
 -13  -6   5   -3.04    1.85
  13   6  -5   -0.74    2.35
 -13   6   5   -1.21    2.37
 -12  -6   5   18.37    2.59
  12  -6  -5   19.53    2.55
  12   6  -5   12.05    2.79
 -12   6   5   17.59    2.95
  11  -6  -5    1.17    1.81
 -11  -6   5    4.44    2.01
 -11   6   5    1.12    2.18
  11   6  -5    4.13    2.23
 -10  -6   5  105.01    5.51
  10  -6  -5  111.55    5.52
  10   6  -5  103.58    5.87
 -10   6   5  113.37    5.96
  -9  -6   5    2.27    1.70
   9  -6  -5    0.80    1.60
  -9   6   5   -1.44    1.81
   9   6  -5    0.29    1.72
  -8  -6   5    5.53    1.66
   8  -6  -5    7.53    1.70
  -8   6   5    8.19    1.92
   8   6  -5    4.37    1.79
  -7  -6   5    4.71    1.46
   7  -6  -5    4.93    1.47
   7   6  -5    5.67    1.67
  -7   6   5    3.97    1.68
   6  -6  -5   50.69    3.04
  -6  -6   5   51.74    2.95
  -6   6   5   55.00    3.27
   6   6  -5   51.45    3.27
   5  -6  -5   -0.46    2.19
   5  -6  -5    1.08    1.11
  -5  -6   5    1.86    1.08
  -5  -6   5    2.01    2.07
  -5   6   5   -0.43    1.16
  -5   6   5   -0.86    1.28
   5   6  -5    2.29    1.35
   5   6  -5   -0.28    1.19
   4  -6  -5   -2.15    2.11
  -4  -6   5   -1.79    1.94
  -4  -6   5    0.42    0.65
   4  -6  -5    0.99    0.45
  -4   6   5    0.97    1.23
   4   6  -5   -1.15    1.24
   4   6  -5   -0.31    1.15
  -4   6   5    0.06    1.11
   3  -6  -5    3.08    2.23
   3  -6  -5   -0.25    0.58
   3   6  -5    0.64    1.16
   3   6  -5    0.18    1.20
  -3   6   5    1.80    1.12
  -3   6   5    1.15    1.20
   2  -6  -5   27.69    3.00
   2  -6  -5   22.16    1.63
  -2   6   5   25.38    2.18
  -2   6   5   27.34    2.13
   2   6  -5   29.64    2.23
   2   6  -5   30.45    2.27
   1  -6  -5    7.42    0.98
  -1  -6   5    5.60    0.90
  -1   6   5   10.54    1.35
   1   6  -5   10.41    1.45
  -1   6   5   11.77    1.39
   1   6  -5   10.09    1.44
   0  -6   5    3.32    0.93
   0  -6  -5    1.10    0.48
   0   6   5    4.50    1.27
   0   6   5    3.99    1.19
   0   6  -5    3.61    1.32
   1  -6   5   14.96    1.47
  -1   6  -5   21.60    1.93
   1   6   5   17.92    1.86
   1   6   5   22.33    1.84
   2  -6   5   38.72    2.46
  -2  -6  -5   37.82    2.54
  -2   6  -5   43.71    2.88
  -3  -6  -5    1.59    1.33
   3  -6   5    2.93    1.26
  -3   6  -5    2.65    1.57
   3   6   5    4.56    1.61
  -4  -6  -5    2.92    1.54
   4  -6   5    4.74    1.43
   4   6   5    2.50    1.70
  -4   6  -5    2.69    1.66
  -5  -6  -5    0.95    1.60
   5  -6   5   -1.71    1.33
   5   6   5    0.28    1.68
  -5   6  -5   -0.39    1.71
  -6  -6  -5    4.92    1.89
   6  -6   5    2.65    1.64
  -6   6  -5    4.50    2.03
   6   6   5    5.98    1.98
  -7  -6  -5   53.25    3.73
   7  -6   5   55.75    3.74
  -7   6  -5   54.06    4.13
   7   6   5   57.99    4.11
   8  -6   5    2.72    1.92
  -8  -6  -5    7.54    2.09
   8   6   5    1.45    2.16
  -8   6  -5    5.02    2.34
  -9  -6  -5   -1.30    1.78
   9  -6   5   -0.73    1.80
   9   6   5    2.23    2.23
  -9   6  -5    2.58    2.39
  10  -6   5    4.91    2.13
 -10   6  -5   12.96    2.94
  10   6   5   10.82    2.88
  11  -6   5    3.90    2.15
 -11   6  -5    6.40    2.85
  11   6   5    2.37    2.71
 -12   6  -5   -0.15    2.89
  12   6   5    0.87    2.83
  13   6   5    7.08    3.47
 -13   6  -5   12.36    3.51
 -14   6  -5   11.64    3.74
  14   6   5    5.92    3.61
 -15   6  -5   -3.68    3.46
  15   6   5    0.61    3.62
  18   7  -5   -5.60    3.18
 -18   7   5   -1.92    3.16
 -17   7   5    5.08    3.42
  17   7  -5    6.74    3.37
 -16   7   5    2.08    3.09
  16   7  -5    9.75    3.34
  15   7  -5   -0.33    2.80
 -15   7   5   -1.37    2.76
  14   7  -5    1.14    2.59
 -14   7   5   -2.41    2.53
  13  -7  -5    8.95    2.12
  13   7  -5    7.40    2.76
 -13   7   5    5.74    2.67
  12  -7  -5    4.19    1.84
 -12  -7   5   -1.80    1.60
 -12   7   5    0.21    2.30
  12   7  -5    4.23    2.47
  11  -7  -5    1.35    1.61
 -11  -7   5    0.23    1.75
  11   7  -5    0.90    2.17
 -11   7   5    3.84    2.34
 -10  -7   5   30.96    2.75
  10  -7  -5   33.16    2.80
  10   7  -5   26.84    3.05
 -10   7   5   29.95    3.12
   9  -7  -5   53.78    3.44
  -9  -7   5   52.25    3.45
   9   7  -5   67.14    3.97
  -9   7   5   51.34    3.90
   8  -7  -5   25.58    2.24
  -8  -7   5   25.72    2.28
   8   7  -5   27.11    2.67
  -8   7   5   26.75    2.65
  -7  -7   5   11.30    1.47
   7  -7  -5    9.75    1.59
   7   7  -5   11.49    1.93
  -7   7   5    8.98    1.88
   6  -7  -5    1.32    0.94
  -6  -7   5    0.90    0.46
   6   7  -5    2.38    1.50
  -6   7   5    0.36    1.49
  -5  -7   5   42.47    3.85
   5  -7  -5   45.48    3.89
   5   7  -5   45.39    2.87
  -5   7   5   42.17    2.82
  -5   7   5   42.76    2.79
   5   7  -5   39.95    2.81
  -4  -7   5    4.41    2.26
   4  -7  -5    0.81    2.46
   4   7  -5    2.46    1.28
  -4   7   5    3.79    1.33
  -4   7   5    2.83    1.22
   4   7  -5    4.62    1.40
   3  -7  -5   11.47    2.59
  -3  -7   5   10.03    2.48
   3   7  -5   12.32    1.53
  -3   7   5   10.60    1.42
   3   7  -5   10.39    1.45
  -3   7   5   10.95    1.49
   2  -7  -5   -0.30    2.40
   2   7  -5   -0.22    1.18
   2   7  -5    2.53    1.19
  -2   7   5   -0.99    1.10
  -2   7   5    1.53    1.08
   1  -7  -5    2.57    2.37
  -1  -7   5    1.07    0.67
   1   7  -5    1.32    1.23
  -1   7   5    1.91    1.12
   1   7  -5    0.91    1.23
  -1   7   5    1.75    1.08
   0  -7   5    0.00    0.28
   0   7  -5    1.01    1.28
   0   7  -5    1.13    1.32
   0   7   5    1.64    1.14
   0   7   5    1.07    1.18
   1  -7   5   10.51    1.16
  -1   7  -5   14.81    1.73
   1   7   5   15.23    1.60
   1   7   5   17.94    1.77
  -2  -7  -5   -0.74    0.72
   2  -7   5   -1.00    0.99
  -2   7  -5    0.00    1.42
   2   7   5    1.17    1.43
  -3  -7  -5    9.74    1.28
   3  -7   5   15.56    1.57
  -3   7  -5   15.43    1.99
   3   7   5   14.27    1.98
  -4  -7  -5    9.15    1.61
   4  -7   5    8.69    1.51
   4   7   5    8.60    1.94
  -4   7  -5    6.45    1.88
  -5  -7  -5    7.63    1.71
   5  -7   5    6.04    1.54
  -5   7  -5    4.40    2.00
   5   7   5    6.53    2.00
  -6  -7  -5   12.49    2.03
   6  -7   5   13.59    1.95
  -6   7  -5   12.21    2.36
   6   7   5   13.84    2.43
  -7  -7  -5    3.56    1.68
   7  -7   5    0.32    1.58
   7   7   5    2.27    2.07
  -7   7  -5   -1.55    2.01
   8  -7   5   14.32    2.14
  -8   7  -5   12.42    2.56
   8   7   5   12.75    2.72
   9  -7   5    0.08    1.61
  -9   7  -5    0.34    2.29
   9   7   5    0.35    2.25
 -10   7  -5   -4.05    2.37
  10   7   5    2.98    2.60
  11   7   5   -0.10    2.74
 -11   7  -5    1.45    2.71
  12   7   5    6.60    3.26
 -12   7  -5    8.36    3.16
  13   7   5    1.29    3.20
 -13   7  -5   -0.79    3.03
  14   7   5    4.68    3.65
 -14   7  -5    3.55    3.40
 -18   8   5   11.71    3.87
  18   8  -5   15.61    4.22
  17   8  -5   17.50    3.96
 -17   8   5   14.91    3.82
 -16   8   5   -1.31    2.80
  16   8  -5    3.70    3.10
 -15   8   5    0.13    2.68
  15   8  -5   -2.46    2.79
 -14   8   5    4.91    2.88
  14   8  -5   15.00    3.28
  13   8  -5   -1.71    2.39
 -13   8   5   -1.51    2.35
 -12   8   5    0.53    2.31
  12   8  -5    5.18    2.50
  11   8  -5    2.90    2.35
 -11   8   5    2.47    2.32
  10  -8  -5  116.80    5.84
 -10   8   5  122.53    6.48
  10   8  -5  126.46    6.47
   9  -8  -5    3.42    1.43
  -9  -8   5    3.96    1.37
  -9   8   5    1.67    2.00
   9   8  -5    1.64    1.99
   8  -8  -5    6.50    1.46
  -8   8   5    2.56    1.92
   8   8  -5    5.70    2.01
   7  -8  -5    1.09    0.43
  -7  -8   5    1.45    0.91
   7   8  -5    3.31    1.70
  -7   8   5    2.05    1.71
   6  -8  -5    9.13    1.27
  -6  -8   5   11.18    2.61
  -6   8   5   10.22    1.85
   6   8  -5   10.97    1.81
   6   8  -5    9.31    1.69
  -6   8   5    9.88    1.69
  -5  -8   5    5.79    2.54
   5  -8  -5    4.52    2.64
   5   8  -5    5.55    1.53
  -5   8   5    2.34    1.30
   5   8  -5    3.30    1.34
  -5   8   5    3.41    1.48
   4  -8  -5   -4.15    2.52
  -4  -8   5   -1.48    2.40
   4   8  -5    1.17    1.21
   4   8  -5   -0.45    1.34
  -4   8   5    0.38    1.18
  -4   8   5    0.93    1.27
  -3  -8   5   -2.88    2.39
   3  -8  -5    2.32    2.61
   3   8  -5   -0.86    1.16
  -3   8   5   -0.15    1.09
   3   8  -5    1.24    1.27
  -3   8   5   -1.61    1.21
   2  -8  -5  143.13    7.81
  -2   8   5  139.34    6.31
   2   8  -5  149.54    6.47
   2   8  -5  143.62    6.41
  -2   8   5  145.03    6.35
   1  -8  -5   18.28    3.01
   1   8  -5   12.83    1.64
  -1   8   5   15.48    1.60
   1   8  -5   17.08    1.75
  -1   8   5   12.85    1.47
   0   8  -5    9.55    1.54
   0   8   5    8.49    1.48
   0   8   5    5.45    1.28
   0   8  -5    6.28    1.49
   1  -8   5    2.19    0.78
   1   8   5    3.58    1.40
   1   8   5    1.00    1.18
  -1   8  -5    2.01    1.47
  -1   8  -5   -1.38    1.34
   2   8   5   22.42    2.06
  -2   8  -5   23.40    2.21
   3  -8   5   71.16    3.62
  -3  -8  -5   75.90    3.54
   3   8   5   73.48    4.14
  -3   8  -5   70.79    4.17
  -4  -8  -5    0.47    0.56
   4  -8   5    3.61    1.22
  -4   8  -5    3.54    1.82
   4   8   5    8.07    1.92
   5  -8   5    2.86    1.31
   5   8   5    2.46    1.93
  -5   8  -5    6.10    2.02
   6  -8   5   20.44    2.02
   6   8   5   17.92    2.66
  -6   8  -5   15.61    2.56
  -7   8  -5    9.22    2.45
   7   8   5   14.23    2.56
  -8   8  -5    0.91    2.22
   8   8   5    0.80    2.20
   9   8   5   -0.67    2.35
  -9   8  -5    0.39    2.46
  10   8   5    8.47    2.87
 -10   8  -5    2.39    2.59
  11   8   5   -1.47    2.76
 -11   8  -5   -0.31    2.73
 -12   8  -5    4.90    3.14
  12   8   5    7.54    3.31
 -13   8  -5   -2.92    3.03
  13   8   5    5.01    3.29
 -14   8  -5   -0.26    3.36
  14   8   5   -0.36    3.32
 -18   9   5    2.55    3.36
  18   9  -5   -0.11    3.55
 -17   9   5   -1.83    3.06
  17   9  -5   -4.64    3.13
 -16   9   5    1.81    2.97
  16   9  -5    2.34    3.12
 -15   9   5   -2.76    2.75
  15   9  -5    1.01    2.90
  14   9  -5    2.10    2.81
 -14   9   5    4.35    2.79
 -13   9   5    1.87    2.64
  13   9  -5   -1.89    2.55
 -12   9   5    7.30    2.69
  12   9  -5   12.01    2.88
  11   9  -5    3.88    2.32
 -11   9   5    1.56    2.31
  10   9  -5   21.77    2.90
 -10   9   5   22.92    2.90
  -9   9   5   35.14    3.18
   9   9  -5   30.23    3.09
  -8   9   5   91.82    5.14
   8   9  -5   94.24    5.12
   7   9  -5    2.28    1.70
  -7   9   5   -0.16    1.72
  -6  -9   5   -1.73    2.56
   6  -9  -5    3.53    3.00
   6   9  -5   -0.05    1.58
  -6   9   5    1.24    1.61
   6   9  -5    0.42    1.47
  -6   9   5    1.08    1.46
   5  -9  -5    1.29    2.91
  -5  -9   5   -3.88    2.61
  -5   9   5   -1.26    1.27
   5   9  -5    2.35    1.53
  -5   9   5    0.78    1.45
   5   9  -5    2.98    1.40
   4  -9  -5   36.37    3.95
  -4  -9   5   34.20    3.72
   4   9  -5   33.03    2.63
   4   9  -5   37.87    2.60
  -4   9   5   33.57    2.55
  -4   9   5   35.99    2.57
  -3  -9   5    1.72    2.64
   3  -9  -5    1.83    2.82
   3   9  -5    0.45    1.21
  -3   9   5    0.54    1.09
  -3   9   5    1.89    1.30
   3   9  -5    0.29    1.34
   2  -9  -5   -2.28    2.86
   2   9  -5   -1.68    1.25
   2   9  -5    1.31    1.30
  -2   9   5   -0.29    1.08
  -2   9   5    0.58    1.20
   1  -9  -5    0.78    2.85
   1   9  -5   -2.43    1.25
   1   9  -5   -1.72    1.22
  -1   9   5    1.28    1.19
  -1   9   5    0.35    1.09
   0   9   5   25.73    2.29
   0   9   5   22.12    1.92
   0   9  -5   30.52    2.39
   0   9  -5   30.47    2.52
   1   9   5   26.77    2.22
  -1   9  -5   25.47    2.23
   1   9   5   21.88    1.95
  -1   9  -5   24.34    2.20
  -2   9  -5    9.11    1.86
   2   9   5    9.10    1.55
  -3   9  -5    7.05    1.86
   3   9   5    4.96    1.81
  -4   9  -5    4.03    1.94
   4   9   5    3.66    1.94
  -5   9  -5    1.96    1.95
   5   9   5    1.00    1.96
   6   9   5   13.36    2.49
  -6   9  -5    9.43    2.27
  -7   9  -5   -0.28    2.13
   7   9   5   -0.06    2.14
   8   9   5    1.15    2.25
  -8   9  -5    0.65    2.30
  -9   9  -5    4.29    2.61
   9   9   5    7.18    2.77
 -10   9  -5    0.39    2.56
  10   9   5    2.68    2.79
  11   9   5    4.98    2.97
 -11   9  -5    3.73    2.76
 -12   9  -5   15.71    3.63
  12   9   5   25.17    4.12
  13   9   5    2.11    3.47
 -13   9  -5    1.93    3.14
 -17  10   5   10.20    3.62
  17  10  -5   11.13    3.85
  16  10  -5    2.13    3.28
 -16  10   5    1.88    3.11
  15  10  -5    8.27    3.39
 -15  10   5    8.60    3.15
 -14  10   5   -0.10    2.72
  14  10  -5    6.14    3.05
 -13  10   5   33.70    3.84
  13  10  -5   30.68    3.94
 -12  10   5   -1.88    2.34
  12  10  -5   -2.27    2.38
  11  10  -5    0.10    2.23
 -11  10   5    1.14    2.33
  10  10  -5   50.17    4.08
 -10  10   5   50.32    4.05
  -9  10   5    3.21    2.14
   9  10  -5    2.61    2.20
   8  10  -5    5.50    2.04
  -8  10   5    3.92    2.05
  -7  10   5   15.71    2.25
   7  10  -5   14.43    2.21
   6 -10  -5   15.90    3.52
  -6 -10   5    7.75    3.05
   6  10  -5   10.42    1.92
  -6  10   5    9.04    1.90
   5 -10  -5    2.19    3.16
  -5 -10   5   -0.38    2.96
   5  10  -5    0.96    1.59
  -5  10   5    0.04    1.51
  -4 -10   5    0.99    2.95
   4 -10  -5    2.05    3.04
  -4  10   5    2.06    1.44
  -4  10   5   -1.94    1.23
   4  10  -5    0.70    1.33
   4  10  -5   -0.23    1.50
   3 -10  -5   29.89    3.89
  -3 -10   5   29.12    3.79
   3  10  -5   27.44    2.25
  -3  10   5   29.41    2.24
   3  10  -5   27.49    2.46
  -3  10   5   22.89    2.08
  -2 -10   5    1.40    3.02
   2 -10  -5    0.24    3.18
  -2  10   5    0.83    1.26
   2  10  -5    1.09    1.34
   2  10  -5    1.67    1.41
  -2  10   5    0.87    1.13
   1 -10  -5    8.62    3.26
  -1  10   5    9.77    1.46
  -1  10   5    5.77    1.27
   1  10  -5    7.42    1.54
   1  10  -5    8.70    1.61
   0  10   5   18.01    1.82
   0  10  -5   23.51    2.07
   0  10   5   13.65    1.60
   1  10   5   42.31    3.04
  -1  10  -5   48.20    3.10
   2  10   5   -0.76    1.56
  -2  10  -5    0.83    1.65
   3  10   5   -1.46    1.71
  -3  10  -5    2.85    1.75
  -4  10  -5    0.41    1.89
   4  10   5    2.73    1.98
   5  10   5   14.23    2.47
  -5  10  -5   10.67    2.30
  -6  10  -5    9.32    2.32
   6  10   5    6.44    2.39
   7  10   5   10.32    2.66
  -7  10  -5   11.20    2.52
  -8  10  -5    0.78    2.38
   8  10   5    2.36    2.40
  -9  10  -5    2.15    2.60
   9  10   5    5.37    2.90
  10  10   5   -0.49    2.80
 -10  10  -5   -0.43    2.62
  11  10   5   -0.83    2.88
 -11  10  -5   -0.18    2.80
 -12  10  -5   -3.22    2.92
  12  10   5   -0.22    3.36
  13  10   5   11.41    3.96
 -13  10  -5    7.94    3.44
  16  11  -5    4.12    3.47
 -16  11   5    6.05    3.31
  15  11  -5    0.07    3.13
 -15  11   5   -1.18    2.94
  14  11  -5   -4.42    2.69
 -14  11   5   -2.54    2.63
 -13  11   5    2.36    2.71
  13  11  -5    3.46    2.92
 -12  11   5    3.86    2.67
  12  11  -5    3.22    2.64
 -11  11   5   -0.91    2.33
  11  11  -5   -1.97    2.44
  10  11  -5   19.23    2.97
 -10  11   5   16.87    2.91
  -9  11   5    0.01    2.07
   9  11  -5   -0.82    2.11
   8  11  -5    2.36    2.07
  -8  11   5    5.11    2.06
   7 -11  -5    2.05    3.49
  -7  11   5    3.29    1.88
   7  11  -5   -0.27    1.86
  -6 -11   5    2.20    3.12
   6 -11  -5    0.63    3.30
  -6  11   5    2.68    1.78
   6  11  -5   -0.17    1.74
   5 -11  -5    4.50    3.58
  -5 -11   5   10.72    3.44
   5  11  -5    6.19    1.83
  -5  11   5    6.35    1.74
   4 -11  -5   45.07    4.88
  -4 -11   5   50.60    4.71
   4  11  -5   47.82    3.11
  -4  11   5   46.55    3.07
  -3 -11   5    3.32    3.27
   3 -11  -5    5.08    3.52
  -3  11   5    4.57    1.45
   3  11  -5    4.78    1.58
  -2 -11   5    9.18    3.49
   2 -11  -5    8.78    3.73
  -2  11   5   12.53    1.62
   2  11  -5   14.81    1.79
   1 -11  -5   19.86    3.93
   1  11  -5   15.08    1.93
  -1  11   5   20.90    1.90
   0  11  -5    0.85    1.56
   0  11   5    1.65    1.39
   1  11   5    3.84    1.54
  -1  11  -5    1.92    1.64
   2  11   5   -0.31    1.68
  -2  11  -5   -0.06    1.71
  -3  11  -5   10.09    2.02
   3  11   5    7.32    2.11
  -4  11  -5   -2.58    1.86
   4  11   5    2.61    2.03
  -5  11  -5    0.28    1.97
   5  11   5   -0.37    2.10
   6  11   5   -2.61    2.18
  -6  11  -5    2.29    2.13
   7  11   5   12.02    2.85
  -7  11  -5    4.45    2.36
   8  11   5    6.97    2.82
  -8  11  -5    6.93    2.66
  -9  11  -5    5.66    2.79
   9  11   5    4.11    2.95
  10  11   5    3.31    3.08
 -10  11  -5    3.78    2.83
  11  11   5    0.02    3.14
 -11  11  -5    0.06    2.76
  12  11   5    3.13    3.53
 -12  11  -5    1.70    3.16
  15  12  -5    4.52    3.38
 -15  12   5    4.89    3.22
 -14  12   5   12.18    3.35
  14  12  -5   18.64    3.72
 -13  12   5    0.84    2.66
  13  12  -5   -2.67    2.82
  12  12  -5    0.39    2.71
 -12  12   5   -0.52    2.58
  11  12  -5   -0.60    2.61
 -11  12   5   -0.49    2.41
 -10  12   5   56.93    4.43
  10  12  -5   57.93    4.49
   9  12  -5    3.81    2.30
  -9  12   5   -1.59    2.04
   8 -12  -5   -4.43    3.60
  -8  12   5    2.21    2.04
   8  12  -5   -1.33    2.03
   7 -12  -5   25.89    4.42
  -7  12   5   20.04    2.52
   7  12  -5   24.77    2.67
  -6 -12   5   26.06    4.13
   6 -12  -5   27.67    4.55
   6  12  -5   29.29    2.68
  -6  12   5   27.53    2.53
  -5 -12   5   -3.73    3.28
   5 -12  -5    4.03    3.70
  -5  12   5    2.21    1.65
   5  12  -5    0.95    1.76
   4 -12  -5    4.18    3.72
  -4 -12   5    1.43    3.26
  -4  12   5    1.17    1.54
   4  12  -5   -2.22    1.57
  -3 -12   5    9.30    3.70
   3 -12  -5   14.61    4.04
  -3  12   5   16.29    1.82
   3  12  -5   15.82    1.93
   2 -12  -5   18.98    4.23
  -2 -12   5   23.78    4.08
  -2  12   5   18.88    1.88
   2  12  -5   21.39    2.04
  -1 -12   5   -4.31    3.43
   1 -12  -5    4.03    3.46
  -1  12   5    0.25    1.38
   1  12  -5   -0.88    1.47
   0  12   5   29.46    2.53
   0  12  -5   31.13    2.58
  -1  12  -5   48.86    3.28
  -2  12  -5   44.13    3.26
   2  12   5   47.28    3.30
   3  12   5    2.53    1.97
  -3  12  -5   -0.51    1.82
  -4  12  -5    1.59    2.00
   4  12   5    1.11    2.14
  -5  12  -5    0.54    2.09
   5  12   5   -0.27    2.28
   6  12   5   17.02    2.91
  -6  12  -5    9.20    2.57
   7  12   5    3.43    2.64
  -7  12  -5    3.02    2.41
  -8  12  -5   -2.71    2.36
   8  12   5   -0.02    2.82
  -9  12  -5    1.25    2.61
   9  12   5   -1.55    3.00
 -10  12  -5   -0.90    2.80
  10  12   5    6.55    3.38
 -11  12  -5    7.68    3.23
  11  12   5   15.07    3.99
 -15  13   5    6.39    3.26
  15  13  -5    8.44    3.87
  14  13  -5    1.04    3.38
 -14  13   5    1.92    2.97
 -13  13   5    0.17    2.78
  13  13  -5   -0.87    3.05
  12  13  -5    4.22    3.07
 -12  13   5    9.55    2.98
 -11  13   5   19.05    3.13
  11  13  -5   21.15    3.47
 -10  13   5    3.88    2.43
  10  13  -5    3.83    2.56
   9  13  -5    9.09    2.57
  -9  13   5    7.44    2.41
   8 -13  -5    2.73    4.05
  -8  13   5    1.81    2.17
   8  13  -5    2.89    2.27
   7 -13  -5   13.87    4.27
   7  13  -5   10.17    2.27
  -7  13   5    7.36    2.15
   6 -13  -5    0.56    3.93
  -6 -13   5   -3.08    3.40
   6  13  -5   -2.36    1.89
  -6  13   5   -0.01    1.79
   5 -13  -5    0.54    3.89
  -5 -13   5    1.73    3.63
   5  13  -5   -0.55    1.72
  -5  13   5    0.56    1.65
   4 -13  -5    2.40    3.74
  -4 -13   5    0.97    3.68
   4  13  -5   -0.17    1.69
  -4  13   5   -0.95    1.57
   3 -13  -5    1.04    3.82
  -3 -13   5    2.02    3.62
   3  13  -5    1.77    1.61
  -3  13   5    0.94    1.45
   2 -13  -5    1.94    3.80
  -2 -13   5    2.48    3.71
   2  13  -5    6.83    1.66
   1 -13  -5   -0.41    3.57
  -1 -13   5    1.88    3.69
  -1  13   5    1.61    1.44
   1  13  -5   -0.53    1.54
   0  13  -5   -0.04    1.55
  -1  13  -5    0.25    1.70
  -2  13  -5    1.63    1.75
   2  13   5    5.60    1.93
  -3  13  -5   22.34    2.59
   4  13   5   -1.27    2.16
  -4  13  -5    2.47    2.13
  -5  13  -5    2.48    2.28
   5  13   5   -0.57    2.31
   6  13   5    2.75    2.63
  -6  13  -5    1.72    2.23
  -7  13  -5   11.64    2.85
   7  13   5   11.63    3.05
   8  13   5   -3.29    2.83
  -8  13  -5   -1.85    2.54
   9  13   5    7.60    3.38
  -9  13  -5    6.82    3.03
 -10  13  -5    3.32    2.98
  10  13   5    0.49    3.37
  13  14  -5    2.44    3.35
 -13  14   5   -0.29    2.75
  12  14  -5    7.39    3.27
 -12  14   5    0.92    2.72
 -11  14   5   -1.11    2.48
  11  14  -5    4.41    2.98
  10  14  -5   -3.74    2.56
 -10  14   5    0.76    2.40
   9 -14  -5    0.19    4.32
   9  14  -5   -0.21    2.53
  -9  14   5   -0.52    2.25
   8 -14  -5    3.13    4.28
  -8  14   5    0.08    2.20
   8  14  -5    1.93    2.35
   7 -14  -5   15.58    4.67
  -7  14   5   12.93    2.36
   7  14  -5   15.37    2.61
   6 -14  -5   -1.99    4.12
  -6 -14   5    2.73    3.76
  -6  14   5    1.94    1.87
   6  14  -5    0.70    2.04
  -5 -14   5    5.20    4.00
   5 -14  -5   -2.07    4.08
  -5  14   5    1.84    1.76
   5  14  -5    4.61    1.95
   4 -14  -5    1.24    4.06
  -4 -14   5    3.42    3.96
  -4  14   5   -1.81    1.56
   4  14  -5    1.68    1.75
  -3 -14   5    6.99    4.16
   3 -14  -5    1.82    4.15
   3  14  -5    0.61    1.60
  -2 -14   5    1.55    4.04
   2 -14  -5    3.19    4.12
   2  14  -5    8.88    1.76
   1 -14  -5    1.74    3.86
  -1 -14   5    4.13    4.20
   1  14  -5    6.18    1.72
   0 -14   5   21.94    4.89
   0  14  -5   20.50    2.20
   1  14   5    3.43    1.81
  -1  14  -5    1.01    1.82
  -2  14  -5   -2.44    1.78
   2  14   5   -2.42    1.94
  -3  14  -5    2.89    2.10
   3  14   5    4.77    2.22
   4  14   5   -2.33    2.26
  -4  14  -5    3.35    2.18
  -5  14  -5    2.06    2.32
   5  14   5    3.28    2.62
   6  14   5   -0.40    2.62
  -6  14  -5   -0.04    2.39
  -7  14  -5    0.64    2.61
   7  14   5    1.04    2.94
  -8  14  -5    2.96    2.80
   8  14   5    6.58    3.27
  -9  14  -5    4.42    3.05
   9  14   5    2.48    3.39
  12  15  -5   14.44    3.64
 -12  15   5   14.79    3.21
  11 -15  -5    5.97    5.01
  11  15  -5   15.93    3.34
 -11  15   5   10.74    2.95
  10 -15  -5    0.26    4.81
  10  15  -5    4.93    2.98
 -10  15   5    7.28    2.69
   9 -15  -5    2.80    4.58
  -9  15   5    3.56    2.46
   9  15  -5    2.64    2.69
   8 -15  -5   -2.26    4.60
  -8  15   5    8.90    2.36
   8  15  -5    7.32    2.56
   7 -15  -5   -6.67    4.36
   7  15  -5   -1.60    2.29
  -7  15   5    1.62    2.09
   6 -15  -5    1.77    4.40
  -6 -15   5    6.88    4.10
   6  15  -5    2.57    2.07
  -6  15   5   -0.51    1.88
   5 -15  -5    4.40    4.57
  -5 -15   5    2.45    4.22
  -5  15   5    0.43    1.79
   5  15  -5   -0.02    1.99
   4 -15  -5   -0.25    4.33
  -4 -15   5   -2.34    4.24
  -4  15   5    0.53    1.65
   4  15  -5    0.59    1.78
   3 -15  -5    4.10    4.54
  -3 -15   5   -1.36    4.23
   3  15  -5    8.60    1.82
   2 -15  -5    1.43    4.32
  -2 -15   5    0.85    4.31
   1 -15  -5   -0.88    4.18
  -1 -15   5   -0.88    4.35
   1  15  -5   -1.16    1.57
   0 -15   5   23.95    5.28
   1 -15   5    3.44    4.47
  -1  15  -5    2.70    1.78
  -2  15  -5    4.59    2.05
   2  15   5   -0.08    2.02
  -3  15  -5    6.21    2.27
   3  15   5   11.41    2.41
   4  15   5    7.87    2.58
  -4  15  -5    5.69    2.29
   5  15   5    9.07    2.68
  -5  15  -5    5.26    2.35
  -6  15  -5    0.75    2.56
   6  15   5    0.14    2.79
  -7  15  -5   -0.74    2.61
   7  15   5   -0.68    3.03
   8  15   5   -2.70    3.07
  -8  15  -5    4.95    2.93
  11 -16  -5    1.61    5.12
  11  16  -5    1.34    3.19
 -11  16   5    0.57    2.64
  10 -16  -5   13.60    5.26
 -10  16   5    5.11    2.64
  10  16  -5    7.58    3.10
   9 -16  -5    6.77    5.02
  -9  16   5    6.59    2.48
   9  16  -5    7.77    2.89
   8 -16  -5    2.33    4.81
  -8  16   5    1.86    2.28
   8  16  -5    7.63    2.72
   7 -16  -5    7.18    4.99
   7  16  -5   13.59    2.67
  -7  16   5   10.23    2.34
   6 -16  -5   -3.62    4.73
  -6  16   5   -3.64    1.85
   6  16  -5   -0.75    2.12
   5 -16  -5   -5.28    4.41
  -5 -16   5   -0.29    4.35
   5  16  -5   -1.06    1.95
  -4 -16   5   -5.46    4.46
   4 -16  -5   -3.76    4.60
  -3 -16   5    7.04    4.72
   3 -16  -5    6.92    4.87
   2 -16  -5    6.21    4.79
  -2 -16   5    7.97    4.93
  -1 -16   5    0.16    4.59
   0 -16   5   -0.74    4.76
   0  16  -5    4.42    1.75
   1 -16   5   23.07    5.47
  -1  16  -5   13.48    2.15
   2 -16   5   10.94    5.31
  -3  16  -5    2.66    2.17
   3  16   5    3.34    2.29
  -4  16  -5    2.11    2.29
   4  16   5    1.86    2.44
   5  16   5    3.82    2.78
  -5  16  -5   -3.48    2.41
  -6  16  -5    7.55    2.70
   6  16   5    9.94    3.18
   9 -17  -5    5.58    5.41
  -9  17   5    0.78    2.36
   8 -17  -5   -5.58    5.02
  -8  17   5   -1.14    2.22
   8  17  -5   -0.34    2.59
   7 -17  -5    1.00    5.14
  -7  17   5    2.83    2.15
   7  17  -5   -0.43    2.36
   6 -17  -5   -1.01    5.10
  -6  17   5    2.16    2.10
  -5 -17   5   -4.92    4.47
   5 -17  -5   11.51    5.35
  -4 -17   5   -8.04    4.48
   4 -17  -5   -1.06    5.09
   3 -17  -5   24.39    5.80
  -3 -17   5   18.03    5.51
   2 -17  -5    1.68    4.82
  -2 -17   5   -0.29    4.86
  -1 -17   5    8.73    5.18
   0 -17   5    8.87    5.29
   0  17  -5    4.27    1.74
   1 -17   5    3.28    5.08
  -1  17  -5    0.03    1.83
   2 -17   5    1.85    5.19
  -2  17  -5    1.31    1.98
   3 -17   5    1.96    5.20
  -3  17  -5    0.33    2.13
   4  17   5   -3.09    2.44
  -4  17  -5   -1.53    2.34
  -5 -18   5    7.48    4.97
   5 -18  -5   -0.15    5.30
  -4 -18   5    5.63    5.28
   4 -18  -5   -4.42    5.26
  -3 -18   5   -1.95    5.27
   3 -18  -5    2.58    5.32
   2 -18  -5    3.51    5.07
  -2 -18   5    3.34    5.26
  -1 -18   5    1.39    5.30
   0 -18   5    7.39    5.52
   1 -18   5   -4.54    5.26
  20   0  -6   -6.20    3.40
 -20   0   6   -0.58    3.54
  19   0  -6    2.36    3.42
 -19   0   6    1.91    3.38
  18   0  -6    4.59    3.30
 -18   0   6    3.67    3.29
  17   0  -6   22.63    4.00
 -17   0   6   20.72    3.97
 -16   0   6    5.36    2.92
  16   0  -6   -0.71    2.87
 -15   0   6    2.13    2.65
  15   0  -6    5.04    2.78
 -14   0   6   48.19    4.31
  14   0  -6   46.48    4.33
 -13   0   6   -1.13    2.32
  13   0  -6    4.22    2.47
  12   0  -6   14.89    2.66
 -12   0   6   11.34    2.70
  11   0  -6   -3.41    1.79
 -11   0   6    1.77    2.04
 -10   0   6   45.41    3.47
  10   0  -6   40.97    3.42
  -9   0   6  139.42    6.51
   9   0  -6  123.96    6.38
   8   0  -6   26.13    2.60
  -8   0   6   31.12    2.74
   7   0  -6   12.75    1.96
  -7   0   6   16.48    2.04
   6   0  -6  247.20   10.73
  -6   0   6  251.63   10.73
   5   0  -6    6.24    1.61
  -5   0   6    6.09    1.59
   4   0  -6  158.50    7.11
  -4   0   6  157.89    7.07
   3   0  -6    6.68    1.52
  -3   0   6    5.49    1.45
   2   0  -6  310.32   13.09
  -2   0   6  315.87   13.08
  -1   0   6  192.19    8.22
   1   0  -6  185.71    8.22
   0   0  -6  383.01   15.45
   0   0   6  360.34   15.39
  -1   0  -6   16.00    1.92
   1   0   6   15.96    1.85
   2   0   6    0.41    1.40
  -2   0  -6    2.84    1.60
   3   0   6   33.56    2.83
  -3   0  -6   34.45    2.83
   4   0   6   26.20    2.52
  -4   0  -6   25.17    2.60
  -5   0  -6   31.55    2.94
   5   0   6   31.52    2.86
   6   0   6   66.68    4.26
  -6   0  -6   63.17    4.24
  -7   0  -6    4.41    2.32
   7   0   6    4.83    2.10
   8   0   6   18.63    2.69
  -8   0  -6   17.91    3.04
   9   0   6    0.28    2.33
  -9   0  -6    6.26    2.63
  10   0   6   13.11    2.89
 -10   0  -6   10.19    2.91
  11   0   6   18.73    3.34
 -11   0  -6   24.65    3.82
  12   0   6   -1.36    2.71
 -12   0  -6   -1.64    3.01
  13   0   6    3.31    3.16
 -13   0  -6    5.08    3.34
  14   0   6   18.72    3.95
 -14   0  -6   11.20    3.85
  15   0   6    9.76    3.70
 -15   0  -6    8.02    3.78
 -20  -1   6   -4.45    3.15
  20  -1  -6    6.35    3.59
  20   1  -6    2.04    3.62
 -20   1   6   -1.12    3.43
  19  -1  -6    5.09    3.53
 -19  -1   6    9.23    3.60
  19   1  -6    9.03    3.77
 -19   1   6    6.70    3.73
  18  -1  -6    9.15    3.48
 -18  -1   6   -1.58    3.01
 -18   1   6    8.18    3.58
  18   1  -6    5.55    3.51
  17  -1  -6    2.47    2.95
 -17  -1   6    3.29    2.97
  17   1  -6    2.72    2.95
 -17   1   6   -1.30    2.98
 -16  -1   6   24.32    3.88
  16  -1  -6   21.37    3.67
  16   1  -6   16.57    3.54
 -16   1   6   20.42    3.61
 -15  -1   6   22.11    3.53
  15  -1  -6   24.78    3.56
  15   1  -6   23.65    3.55
 -15   1   6   21.15    3.49
 -14  -1   6    7.28    2.85
  14  -1  -6    6.09    2.58
 -14   1   6   -1.12    2.45
  14   1  -6    1.91    2.43
 -13  -1   6    3.45    2.45
  13  -1  -6    0.65    2.27
  13   1  -6    4.88    2.45
 -13   1   6    3.17    2.44
  12  -1  -6   14.54    2.66
 -12  -1   6   11.94    2.53
  12   1  -6   14.98    2.72
 -12   1   6   10.92    2.64
  11  -1  -6    3.42    1.98
 -11  -1   6   -0.80    1.95
  11   1  -6    0.16    1.98
 -11   1   6    3.17    2.13
 -10  -1   6   36.57    3.18
  10  -1  -6   32.25    3.02
 -10   1   6   30.74    3.07
  10   1  -6   31.28    3.05
  -9  -1   6    2.51    1.86
   9  -1  -6    4.91    1.77
  -9   1   6    1.73    1.77
   9   1  -6    1.65    1.71
   8  -1  -6   41.08    3.09
  -8  -1   6   44.22    3.12
  -8   1   6   41.53    3.23
   8   1  -6   42.36    3.15
   7  -1  -6   73.09    4.22
  -7  -1   6   79.79    4.25
  -7   1   6   76.45    4.21
   7   1  -6   75.92    4.23
  -6  -1   6   31.35    2.76
   6  -1  -6   33.81    2.78
   6   1  -6   30.39    2.72
  -6   1   6   32.34    2.73
  -5  -1   6   84.02    4.38
   5  -1  -6   87.09    4.37
  -5   1   6   86.29    4.37
   5   1  -6   81.42    4.41
   4  -1  -6   21.91    2.04
  -4  -1   6   22.67    2.03
  -4   1   6   21.04    1.99
   4   1  -6   19.75    2.03
  -3  -1   6   65.45    3.63
   3  -1  -6   62.68    3.63
   3   1  -6   66.64    3.64
  -3   1   6   65.55    3.63
  -2  -1   6   12.76    1.68
   2  -1  -6   10.07    1.71
   2   1  -6   12.85    1.68
  -2   1   6   11.57    1.64
  -1  -1   6   -1.45    1.28
   1  -1  -6    0.33    1.40
   1   1  -6   -0.23    1.39
  -1   1   6    0.27    1.20
   0  -1   6   83.91    4.44
   0  -1  -6   84.24    4.39
   0   1  -6   88.06    4.40
   0   1   6   90.18    4.40
   1  -1   6   23.56    2.13
  -1  -1  -6   21.95    2.19
  -1   1  -6   24.24    2.24
   2  -1   6  149.79    6.69
  -2  -1  -6  139.86    6.70
  -2   1  -6  145.21    6.77
   2   1   6  145.03    6.72
   3  -1   6    5.00    1.61
  -3  -1  -6    4.56    1.79
   3   1   6    5.77    1.73
  -3   1  -6    3.81    1.78
  -4  -1  -6    9.22    1.97
   4  -1   6    7.98    1.77
  -4   1  -6    8.39    2.04
   4   1   6    7.59    1.83
  -5  -1  -6   87.19    4.96
   5  -1   6   87.33    4.88
   5   1   6   91.22    4.93
  -5   1  -6   89.08    4.94
  -6  -1  -6   19.25    2.67
   6  -1   6   25.53    2.67
   6   1   6   23.48    2.68
  -6   1  -6   23.32    2.82
   7  -1   6    0.77    1.84
  -7  -1  -6   -0.52    2.12
  -7   1  -6   -0.40    2.05
   7   1   6   -0.72    1.90
   8  -1   6    0.53    2.01
  -8  -1  -6    3.90    2.44
   8   1   6    2.55    2.13
  -8   1  -6   -2.30    2.25
  -9  -1  -6   -0.71    2.31
   9  -1   6    2.69    2.33
  -9   1  -6    8.21    2.72
   9   1   6    4.63    2.35
 -10  -1  -6   19.51    3.33
  10  -1   6   18.08    3.15
  10   1   6   22.70    3.40
 -10   1  -6   19.21    3.37
  11  -1   6    3.48    2.65
 -11  -1  -6    0.83    2.85
 -11   1  -6   -0.79    2.82
  11   1   6    4.01    2.61
  12  -1   6    1.01    2.84
 -12  -1  -6   -1.69    2.96
  12   1   6    4.49    3.00
 -12   1  -6   -1.25    2.97
  13  -1   6    0.06    3.07
 -13  -1  -6    1.56    3.22
  13   1   6    1.93    3.13
 -13   1  -6    1.50    3.24
  14  -1   6    5.10    3.47
 -14  -1  -6    2.76    3.26
 -14   1  -6    5.03    3.71
  14   1   6    3.25    3.33
 -15  -1  -6    3.38    3.64
  15  -1   6    5.57    3.61
  15   1   6    7.39    3.91
 -15   1  -6    2.09    3.54
 -20  -2   6   -0.18    3.21
  20  -2  -6    0.50    3.38
  20   2  -6    0.18    3.60
 -20   2   6    4.25    3.76
 -19  -2   6   -3.33    2.92
  19  -2  -6   -0.31    3.18
 -19   2   6    3.33    3.56
  19   2  -6    1.01    3.38
  18  -2  -6    2.83    3.19
 -18  -2   6   -0.47    2.88
 -18   2   6   -1.40    3.20
  18   2  -6   -2.45    2.94
  17  -2  -6   10.58    3.28
 -17  -2   6    1.57    2.93
 -17   2   6    3.55    3.23
  17   2  -6    6.30    3.23
  16  -2  -6    0.92    2.61
 -16  -2   6    2.61    2.84
  16   2  -6    3.26    2.78
 -16   2   6   -0.02    2.89
  15  -2  -6   17.17    3.09
 -15  -2   6   10.51    3.00
  15   2  -6   16.25    3.19
 -15   2   6   13.82    3.24
 -14  -2   6   -2.61    2.31
  14  -2  -6   -4.17    2.08
  14   2  -6    3.80    2.45
 -14   2   6   -0.95    2.52
 -13  -2   6   33.42    3.49
  13  -2  -6   33.57    3.52
 -13   2   6   29.67    3.51
  13   2  -6   34.05    3.55
 -12  -2   6    3.90    2.30
  12  -2  -6    8.06    2.36
 -12   2   6    6.93    2.46
  12   2  -6    5.28    2.33
 -11  -2   6   16.69    2.55
  11  -2  -6   13.49    2.34
  11   2  -6    9.87    2.49
 -11   2   6   13.31    2.51
 -10  -2   6    7.22    2.10
  10  -2  -6    7.90    2.02
  10   2  -6    2.53    1.87
 -10   2   6    5.94    2.04
  -9  -2   6   47.75    3.44
   9  -2  -6   50.36    3.47
   9   2  -6   49.18    3.55
  -9   2   6   52.43    3.60
   8  -2  -6   -1.55    1.52
  -8  -2   6    0.06    1.62
   8   2  -6    1.63    1.55
  -8   2   6    1.91    1.64
   7  -2  -6    5.58    1.72
  -7  -2   6    3.69    1.72
   7   2  -6    3.36    1.58
  -7   2   6    3.62    1.64
   6  -2  -6  116.24    5.78
  -6  -2   6  123.59    5.79
   6   2  -6  123.14    5.77
  -6   2   6  124.97    5.83
   5  -2  -6   -0.32    1.33
   5  -2  -6    0.43    1.42
  -5  -2   6    0.22    1.44
  -5   2   6    0.35    1.39
   5   2  -6    1.70    1.44
   4  -2  -6    6.84    1.54
  -4  -2   6    5.21    1.47
  -4   2   6    3.98    1.48
   4   2  -6    2.88    1.45
   3  -2  -6   -2.49    1.30
  -3  -2   6    1.48    1.38
  -3   2   6   -0.10    1.22
   3   2  -6   -1.77    1.29
   2  -2  -6    8.18    1.57
  -2  -2   6   11.32    1.60
   2   2  -6    8.49    1.56
  -2   2   6    9.41    1.51
   1  -2  -6   15.37    1.85
  -1  -2   6   18.43    1.85
   1   2  -6   17.81    1.88
  -1   2   6   18.38    1.85
   0  -2  -6    7.89    1.65
   0   2   6   12.31    1.72
   0   2  -6   14.21    1.79
   1  -2   6   63.96    3.42
  -1  -2  -6   58.96    3.46
   1   2   6   53.05    3.48
  -1   2  -6   58.05    3.51
   2  -2   6    8.38    1.64
  -2  -2  -6    7.12    1.74
  -2   2  -6    6.84    1.72
   2   2   6    5.26    1.59
  -3  -2  -6    4.40    1.67
   3  -2   6    4.09    1.57
  -3   2  -6    1.13    1.53
   3   2   6    2.29    1.56
   4  -2   6   27.85    2.55
  -4  -2  -6   25.20    2.63
  -4   2  -6   32.01    2.80
   4   2   6   29.80    2.62
   5  -2   6   41.89    3.24
  -5  -2  -6   43.17    3.35
  -5   2  -6   40.01    3.43
   5   2   6   40.81    3.24
  -6  -2  -6    2.39    2.12
   6  -2   6    0.86    1.80
  -6   2  -6    2.92    2.08
   6   2   6    2.04    1.81
   7  -2   6    8.04    2.10
  -7  -2  -6    7.56    2.36
  -7   2  -6    7.25    2.31
   7   2   6    8.32    2.22
   8  -2   6   -0.28    1.94
  -8  -2  -6    3.04    2.37
  -8   2  -6   -1.53    2.32
   8   2   6   -1.36    1.95
  -9  -2  -6    9.87    2.80
   9  -2   6   13.21    2.62
  -9   2  -6    5.83    2.68
   9   2   6    5.58    2.40
  10  -2   6    9.24    2.70
 -10  -2  -6   13.22    3.09
  10   2   6    8.30    2.79
 -10   2  -6   11.83    3.10
  11  -2   6    4.00    2.65
 -11  -2  -6    5.54    2.94
  11   2   6    5.61    2.83
 -11   2  -6   -0.45    2.80
 -12  -2  -6   11.94    3.41
  12  -2   6    3.50    2.94
 -12   2  -6    3.29    3.12
  12   2   6    1.03    2.82
  13  -2   6    4.89    3.04
 -13  -2  -6    7.27    3.39
 -13   2  -6    6.94    3.45
  13   2   6    5.68    3.40
  14  -2   6    1.80    3.08
 -14  -2  -6    2.72    3.30
 -14   2  -6   -0.77    3.42
  14   2   6    3.29    3.42
  15  -2   6    3.01    3.27
  15   2   6    0.65    3.37
 -15   2  -6   -0.36    3.47
  20  -3  -6   13.25    3.93
  20   3  -6   16.95    4.52
 -20   3   6    8.71    4.01
  19  -3  -6   16.87    3.76
 -19  -3   6    2.69    3.11
 -19   3   6   13.09    3.99
  19   3  -6   12.30    3.88
  18  -3  -6    7.87    3.19
 -18  -3   6    0.63    2.73
  18   3  -6    3.02    3.23
 -18   3   6   -1.40    3.25
 -17  -3   6   -1.64    2.71
  17  -3  -6   -1.17    2.76
 -17   3   6   -1.19    3.06
  17   3  -6    1.46    2.90
 -16  -3   6    4.46    2.75
  16  -3  -6   12.76    3.04
  16   3  -6   10.66    3.15
 -16   3   6    6.74    3.20
  15  -3  -6    3.82    2.62
 -15  -3   6    5.67    2.58
  15   3  -6    4.26    2.69
 -15   3   6   -0.73    2.55
  14  -3  -6    8.25    2.63
 -14  -3   6    7.55    2.54
 -14   3   6   13.91    2.92
  14   3  -6    8.69    2.71
 -13  -3   6    3.78    2.33
  13  -3  -6    4.64    2.25
  13   3  -6    2.63    2.31
 -13   3   6   -0.32    2.32
  12  -3  -6   14.64    2.55
 -12  -3   6    8.62    2.55
 -12   3   6    7.61    2.46
  12   3  -6   12.74    2.61
 -11  -3   6   25.48    2.92
  11  -3  -6   26.11    2.89
 -11   3   6   25.06    2.98
  11   3  -6   29.39    3.08
 -10  -3   6   -1.21    1.86
  10  -3  -6    1.13    1.77
 -10   3   6    3.21    1.94
  10   3  -6    2.09    1.93
  -9  -3   6   26.17    2.66
   9  -3  -6   28.87    2.69
   9   3  -6   24.73    2.65
  -9   3   6   34.67    2.93
   8  -3  -6   12.24    2.01
  -8  -3   6   16.14    2.15
  -8   3   6   13.68    2.07
   8   3  -6   12.39    1.98
   7  -3  -6   15.56    2.00
  -7  -3   6   14.16    2.03
   7   3  -6   13.36    1.92
  -7   3   6   16.18    2.03
  -6  -3   6  109.56    5.29
   6  -3  -6  101.62    5.21
  -6   3   6  116.22    5.35
   6   3  -6  108.87    5.30
   5  -3  -6   40.24    2.92
   5  -3  -6   34.50    2.77
  -5  -3   6   45.67    2.86
  -5   3   6   38.62    2.86
   5   3  -6   38.94    2.82
  -4  -3   6   11.03    1.60
   4  -3  -6    5.53    1.77
   4  -3  -6    6.67    1.56
  -4   3   6    9.24    1.56
   4   3  -6    7.09    1.58
   3  -3  -6   18.18    1.85
  -3  -3   6   19.77    1.87
  -3   3   6   17.58    1.80
   3   3  -6   17.35    1.85
  -2  -3   6    5.12    1.39
   2  -3  -6    5.00    1.45
  -2   3   6    3.57    1.30
   2   3  -6    3.62    1.39
  -1  -3   6   18.22    1.80
   1  -3  -6   17.81    1.82
  -1   3   6   18.81    1.82
   1   3  -6   15.29    1.87
   0  -3   6   16.60    1.86
   0  -3  -6   22.49    1.99
   0   3   6   21.29    1.94
   0   3  -6   21.14    2.06
  -1  -3  -6    1.09    1.42
   1  -3   6    3.14    1.38
  -1   3  -6    0.99    1.43
   1   3   6    1.99    1.36
   2  -3   6   39.57    2.81
  -2  -3  -6   38.35    2.86
  -2   3  -6   41.36    2.97
   2   3   6   40.95    2.87
   3  -3   6    6.29    1.63
  -3  -3  -6    6.07    1.76
   3   3   6    5.36    1.64
  -3   3  -6    4.38    1.65
  -4  -3  -6    2.42    1.73
   4  -3   6   -0.49    1.47
  -4   3  -6    1.53    1.75
   4   3   6    0.94    1.60
  -5  -3  -6   85.15    4.81
   5  -3   6   85.14    4.68
  -5   3  -6   85.64    4.87
   5   3   6   81.57    4.81
   6  -3   6    3.42    1.77
  -6  -3  -6   -2.56    1.97
  -6   3  -6   -0.32    1.93
   6   3   6    2.03    1.82
  -7  -3  -6   24.29    3.06
   7  -3   6   29.92    2.96
  -7   3  -6   25.86    3.08
   7   3   6   24.27    2.92
   8  -3   6    3.18    2.11
  -8  -3  -6    0.30    2.28
  -8   3  -6    4.06    2.48
   8   3   6    2.16    2.12
  -9  -3  -6   20.78    3.18
   9  -3   6   23.14    3.05
   9   3   6   21.55    3.09
  -9   3  -6   19.14    3.22
 -10  -3  -6    5.64    2.66
  10  -3   6    2.49    2.44
 -10   3  -6    2.45    2.73
  10   3   6    4.66    2.68
  11  -3   6   10.77    3.06
 -11  -3  -6   17.90    3.43
 -11   3  -6   23.40    3.60
  11   3   6   13.94    3.29
 -12  -3  -6   21.53    3.72
  12  -3   6   30.97    3.96
  12   3   6   22.52    3.81
 -12   3  -6   18.62    3.74
 -13  -3  -6    2.44    3.13
  13  -3   6    4.19    2.96
 -13   3  -6   -1.89    3.22
  13   3   6    3.30    3.26
  14  -3   6    5.46    3.24
  14   3   6   -1.45    3.14
 -14   3  -6   -0.27    3.40
  15  -3   6    4.24    3.35
 -15   3  -6    1.23    3.48
  15   3   6    2.81    3.47
 -20   4   6   12.25    4.10
  20   4  -6    9.00    4.13
  19  -4  -6    9.81    3.45
 -19   4   6    9.48    3.88
  19   4  -6   14.65    4.05
  18  -4  -6   28.03    4.03
  18   4  -6   24.32    4.26
 -18   4   6   19.88    4.09
  17  -4  -6   30.25    4.00
 -17  -4   6   31.73    3.93
 -17   4   6   31.07    4.36
  17   4  -6   26.43    4.22
 -16  -4   6   15.74    3.03
  16  -4  -6   16.87    3.22
  16   4  -6   15.21    3.39
 -16   4   6   15.05    3.36
  15  -4  -6   10.51    2.75
 -15  -4   6    6.81    2.62
 -15   4   6    7.40    2.95
  15   4  -6   14.16    3.11
 -14  -4   6   45.14    4.18
  14  -4  -6   49.04    4.21
  14   4  -6   50.51    4.48
 -14   4   6   39.55    4.20
  13  -4  -6   -1.53    2.16
 -13  -4   6   -0.80    2.10
  13   4  -6    1.69    2.29
 -13   4   6    3.39    2.41
  12  -4  -6   43.02    3.61
 -12  -4   6   33.29    3.45
  12   4  -6   35.77    3.59
 -12   4   6   38.78    3.73
  11  -4  -6    2.93    1.98
 -11  -4   6    4.39    2.12
 -11   4   6    4.11    2.22
  11   4  -6    5.78    2.19
  10  -4  -6    4.89    1.85
 -10  -4   6    5.59    2.00
 -10   4   6    2.53    1.88
  10   4  -6    2.60    1.98
   9  -4  -6  104.00    5.17
  -9  -4   6   97.53    5.19
  -9   4   6   96.66    5.31
   9   4  -6   99.59    5.32
  -8  -4   6   -1.36    1.61
   8  -4  -6   -1.35    1.51
  -8   4   6    0.09    1.60
   8   4  -6    2.24    1.62
   7  -4  -6    1.52    1.56
  -7  -4   6    1.90    1.59
   7   4  -6    4.20    1.65
  -7   4   6    3.18    1.59
  -6  -4   6   92.18    4.73
   6  -4  -6   94.83    4.76
  -6   4   6   92.96    4.82
   6   4  -6  104.13    4.89
   5  -4  -6    1.73    1.81
   5  -4  -6    0.85    1.36
  -5  -4   6    1.80    1.49
  -5  -4   6    0.97    1.35
  -5   4   6   -0.82    1.33
   5   4  -6   -0.36    1.37
   4  -4  -6    5.53    1.41
  -4  -4   6    5.64    1.43
   4  -4  -6    5.56    1.93
  -4   4   6    2.38    1.40
   4   4  -6    4.70    1.45
  -3  -4   6   44.67    2.77
   3  -4  -6   43.46    3.37
   3  -4  -6   44.47    2.81
   3   4  -6   42.73    2.87
  -3   4   6   43.89    2.82
  -2  -4   6   12.80    1.56
   2  -4  -6   14.66    1.65
  -2   4   6   14.08    1.63
   2   4  -6   15.16    1.73
   1  -4  -6   10.68    1.54
   1   4  -6   10.16    1.66
  -1   4   6    9.43    1.54
   0  -4   6   14.92    1.62
   0  -4  -6   12.80    1.66
   0   4  -6   16.51    1.88
   0   4   6   13.46    1.73
   1  -4   6    0.92    1.31
  -1  -4  -6    2.69    1.45
  -1   4  -6    1.83    1.42
   1   4   6    2.16    1.38
  -2  -4  -6    5.08    1.62
   2  -4   6    8.84    1.56
   2   4   6    5.55    1.51
  -2   4  -6    6.29    1.69
   3  -4   6   39.69    2.85
  -3  -4  -6   36.94    2.94
   3   4   6   37.86    2.98
  -3   4  -6   44.79    3.08
   4  -4   6    1.40    1.48
  -4  -4  -6    0.15    1.65
   4   4   6    0.97    1.64
  -4   4  -6   -0.63    1.67
   5  -4   6   -0.51    1.49
  -5  -4  -6   -2.58    1.75
  -5   4  -6    0.30    1.87
   5   4   6    0.79    1.64
  -6  -4  -6    4.95    2.16
   6  -4   6    2.82    1.75
  -6   4  -6    2.40    2.03
   6   4   6    0.77    1.80
   7  -4   6   29.68    3.01
  -7  -4  -6   23.14    2.93
  -7   4  -6   25.68    3.06
   7   4   6   24.29    3.00
  -8  -4  -6    5.79    2.51
   8  -4   6    7.93    2.30
   8   4   6    8.89    2.50
  -8   4  -6   14.24    2.72
  -9  -4  -6   -0.21    2.38
   9  -4   6    0.12    2.04
   9   4   6    0.00    2.13
  -9   4  -6    2.81    2.43
  10  -4   6   17.58    2.95
 -10  -4  -6   16.38    2.99
 -10   4  -6   16.71    3.15
  10   4   6   12.23    3.14
  11  -4   6    6.80    2.75
 -11  -4  -6   11.47    2.74
 -11   4  -6    7.97    3.11
  11   4   6    7.93    3.00
  12  -4   6   -1.18    2.58
 -12  -4  -6    4.77    2.77
  12   4   6    0.52    2.97
 -12   4  -6   -4.35    2.71
  13  -4   6    4.85    2.97
 -13   4  -6    0.28    3.22
  13   4   6    3.25    3.25
  14  -4   6   24.92    4.07
  14   4   6   20.96    4.47
 -14   4  -6   15.73    4.04
  19   5  -6    9.08    3.92
 -19   5   6    7.61    3.83
 -18   5   6   -2.08    3.07
  18   5  -6    0.38    3.01
  17  -5  -6    3.51    2.68
  17   5  -6    3.08    3.15
 -17   5   6    2.48    3.16
  16  -5  -6    9.55    2.79
 -16  -5   6    1.08    2.24
  16   5  -6    8.94    3.22
 -16   5   6    3.22    3.09
  15  -5  -6    0.86    2.25
 -15  -5   6    2.19    2.13
  15   5  -6    3.09    2.72
 -15   5   6    1.58    2.60
  14  -5  -6    1.62    2.14
 -14  -5   6    1.43    2.07
 -14   5   6   -0.05    2.44
  14   5  -6   -0.14    2.39
  13  -5  -6   19.62    2.82
 -13  -5   6   21.40    2.90
 -13   5   6   21.65    3.13
  13   5  -6   17.17    2.98
  12  -5  -6   -0.30    2.01
 -12  -5   6   -0.60    2.05
  12   5  -6    0.91    2.08
 -12   5   6    0.50    2.15
  11  -5  -6   15.65    2.41
 -11  -5   6   12.77    2.39
 -11   5   6   13.37    2.56
  11   5  -6   12.69    2.58
 -10  -5   6   -0.02    1.85
  10  -5  -6    7.46    1.93
 -10   5   6    1.96    1.96
  10   5  -6    3.06    1.99
   9  -5  -6   19.60    2.29
  -9  -5   6   14.09    2.20
  -9   5   6   12.01    2.27
   9   5  -6   16.49    2.32
   8  -5  -6    3.06    1.62
  -8  -5   6    1.19    1.63
  -8   5   6   -0.82    1.64
   8   5  -6    1.56    1.67
  -7  -5   6    1.65    1.51
   7  -5  -6    1.81    1.48
  -7   5   6    1.57    1.53
   7   5  -6    1.09    1.57
   6  -5  -6  132.54    6.25
  -6  -5   6  137.11    6.28
   6   5  -6  140.19    6.40
  -6   5   6  141.07    6.44
   5  -5  -6   13.86    2.31
  -5  -5   6   10.00    1.60
  -5  -5   6   11.41    1.92
   5  -5  -6   11.84    1.66
   5   5  -6   11.74    1.75
  -5   5   6   11.27    1.71
   4  -5  -6   11.78    2.28
   4  -5  -6   12.05    1.57
  -4  -5   6   10.49    1.99
  -4  -5   6   10.10    1.47
   4   5  -6   12.32    1.70
  -4   5   6   10.38    1.60
   3  -5  -6   69.60    4.44
   3  -5  -6   64.38    3.58
  -3  -5   6   73.82    3.62
  -3   5   6   70.89    3.72
   3   5  -6   76.37    3.78
   2  -5  -6   64.50    3.48
   2   5  -6   68.96    3.67
  -2   5   6   70.78    3.62
   1  -5  -6    6.79    1.41
  -1  -5   6    9.61    1.37
  -1   5   6    9.94    1.51
   1   5  -6    8.51    1.56
   0  -5  -6  107.33    5.14
   0  -5   6  117.72    5.18
   0   5  -6  112.83    5.35
   0   5   6  109.44    5.30
  -1  -5  -6    0.70    1.34
   1  -5   6    2.13    1.24
  -1   5  -6    1.95    1.43
   1   5   6    1.16    1.36
  -2  -5  -6   13.67    1.84
   2  -5   6   11.59    1.62
  -2   5  -6   16.20    2.00
  -3  -5  -6   11.13    1.84
   3  -5   6    8.35    1.63
  -3   5  -6    8.36    1.86
   3   5   6    7.44    1.73
   4  -5   6   13.77    1.95
  -4  -5  -6   14.07    2.14
  -4   5  -6   18.05    2.27
   4   5   6   16.84    2.27
   5  -5   6    7.49    1.76
  -5  -5  -6    4.22    1.97
  -5   5  -6    5.06    1.99
   5   5   6    5.72    2.00
   6  -5   6   23.11    2.46
  -6  -5  -6   13.69    2.45
   6   5   6   16.46    2.55
  -6   5  -6   17.24    2.61
   7  -5   6   25.90    2.76
  -7  -5  -6   23.92    2.95
  -7   5  -6   18.28    2.84
   7   5   6   23.42    2.99
   8  -5   6   16.46    2.49
  -8  -5  -6   10.43    2.48
   8   5   6   12.81    2.69
  -8   5  -6   14.51    2.68
  -9  -5  -6   -0.64    2.08
   9  -5   6    2.42    2.16
   9   5   6   -2.78    2.09
  -9   5  -6    0.90    2.37
 -10  -5  -6   23.77    3.07
  10  -5   6   17.64    2.97
 -10   5  -6   18.00    3.30
  10   5   6   21.20    3.40
  11  -5   6    3.87    2.59
 -11   5  -6    3.79    2.91
  11   5   6    3.12    2.89
  12  -5   6    3.08    2.58
  12   5   6    7.87    3.28
 -12   5  -6    6.10    3.16
  13   5   6    4.27    3.42
 -13   5  -6    4.06    3.35
  14   5   6    2.12    3.44
 -14   5  -6    5.70    3.63
 -19   6   6    3.39    3.56
  19   6  -6    0.88    3.62
  18   6  -6    1.23    3.31
 -18   6   6    5.95    3.40
 -17   6   6    0.57    2.95
  17   6  -6    4.81    3.14
  16   6  -6   -0.18    2.75
 -16   6   6    3.44    2.93
  15  -6  -6    4.62    2.20
 -15   6   6    4.37    2.82
  15   6  -6    2.60    2.69
 -14  -6   6   41.19    3.73
  14  -6  -6   46.44    3.82
  14   6  -6   40.77    4.15
 -14   6   6   40.41    4.15
 -13  -6   6   -4.60    1.67
  13  -6  -6    2.45    1.92
  13   6  -6   -1.71    2.25
 -13   6   6    1.49    2.30
 -12  -6   6    3.23    1.96
  12  -6  -6   10.15    2.13
 -12   6   6    6.82    2.41
  12   6  -6    7.11    2.41
 -11  -6   6    6.94    2.20
  11  -6  -6   13.81    2.29
 -11   6   6    7.90    2.39
  11   6  -6    9.56    2.49
  10  -6  -6    3.96    1.90
 -10  -6   6    6.38    1.99
  10   6  -6    5.46    2.14
 -10   6   6    2.86    2.01
  -9  -6   6   27.92    2.67
   9  -6  -6   30.19    2.72
   9   6  -6   32.28    2.92
  -9   6   6   33.89    3.01
  -8  -6   6    7.51    1.80
   8  -6  -6    8.35    1.78
   8   6  -6   11.25    2.04
  -8   6   6    7.51    1.97
   7  -6  -6   13.49    1.85
  -7  -6   6   11.58    1.74
  -7   6   6   12.99    1.98
   7   6  -6   13.33    2.01
  -6  -6   6    9.86    2.06
  -6  -6   6    6.01    1.45
   6  -6  -6   10.34    1.61
   6  -6  -6   12.54    2.50
   6   6  -6   10.60    1.76
  -6   6   6    4.99    1.64
  -5  -6   6    1.03    1.90
   5  -6  -6    1.70    2.22
   5  -6  -6    0.07    1.22
  -5  -6   6    0.48    1.18
  -5   6   6    0.34    1.37
   5   6  -6    2.81    1.45
  -4  -6   6    0.58    1.09
   4  -6  -6    1.74    2.16
   4  -6  -6    0.13    1.05
  -4  -6   6    2.17    1.92
   4   6  -6    1.81    1.35
  -4   6   6   -0.82    1.28
  -4   6   6    1.78    1.24
  -3  -6   6   13.03    1.43
   3  -6  -6   11.65    1.30
   3  -6  -6   14.89    2.60
  -3   6   6   15.90    1.69
  -3   6   6   12.57    1.60
   3   6  -6   17.04    1.80
  -2  -6   6   63.84    3.14
  -2   6   6   58.93    3.38
  -2   6   6   55.46    3.32
   2   6  -6   65.31    3.48
  -1  -6   6    9.65    1.27
   1  -6  -6    9.25    1.18
   1   6  -6   11.07    1.61
  -1   6   6    9.65    1.54
   0  -6  -6   74.65    3.64
   0  -6   6   74.76    3.68
   0   6  -6   76.48    3.97
   0   6   6   69.78    3.91
  -1  -6  -6  106.45    4.85
   1  -6   6  102.31    4.83
   1   6   6  100.18    5.11
  -1   6  -6  103.23    5.06
  -2  -6  -6   11.46    1.69
   2  -6   6   11.82    1.55
  -2   6  -6   15.44    1.99
   3  -6   6   66.49    3.57
  -3  -6  -6   62.37    3.63
   3   6   6   61.60    3.89
  -3   6  -6   66.18    3.96
  -4  -6  -6    9.36    1.86
   4  -6   6    7.72    1.69
   4   6   6    8.48    2.02
  -4   6  -6   10.22    2.07
  -5  -6  -6    9.20    1.99
   5  -6   6    3.04    1.69
  -5   6  -6    6.37    2.14
   5   6   6    7.62    2.09
   6  -6   6   27.68    2.75
  -6  -6  -6   32.25    2.99
  -6   6  -6   32.42    3.18
   6   6   6   31.25    3.12
  -7  -6  -6   21.61    2.67
   7  -6   6   18.39    2.50
   7   6   6   22.12    2.94
  -7   6  -6   19.68    2.85
  -8  -6  -6   -4.03    1.67
   8  -6   6   -0.49    1.76
  -8   6  -6    2.71    2.20
   8   6   6    2.16    2.27
   9  -6   6    4.73    2.10
  -9   6  -6    6.82    2.72
   9   6   6    7.24    2.53
  10  -6   6    1.90    2.04
 -10   6  -6   -1.26    2.57
  10   6   6    0.34    2.47
  11  -6   6   20.91    3.06
 -11   6  -6   14.44    3.43
  11   6   6   22.23    3.73
  12   6   6   -0.90    2.93
 -12   6  -6   -2.62    2.68
  13   6   6   -1.53    3.14
 -13   6  -6    0.88    3.24
  14   6   6    2.56    3.62
 -14   6  -6    1.25    3.50
  19   7  -6    3.06    3.58
 -19   7   6    1.89    3.51
  18   7  -6   -1.29    3.19
 -18   7   6    1.27    3.17
  17   7  -6    9.53    3.41
 -17   7   6    7.13    3.40
 -16   7   6    6.47    3.22
  16   7  -6   11.89    3.37
  15   7  -6    4.31    2.88
 -15   7   6    0.60    2.61
 -14   7   6    1.69    2.59
  14   7  -6    3.14    2.65
  13  -7  -6   42.79    3.34
  13   7  -6   42.31    4.10
 -13   7   6   42.21    4.06
 -12  -7   6   47.43    3.59
  12  -7  -6   50.92    3.56
 -12   7   6   51.63    4.33
  12   7  -6   57.65    4.48
 -11  -7   6   61.41    3.89
  11  -7  -6   64.15    3.88
 -11   7   6   60.51    4.51
  11   7  -6   57.50    4.45
 -10  -7   6   12.08    2.03
  10  -7  -6   11.73    2.07
 -10   7   6   13.16    2.49
  10   7  -6   11.16    2.42
   9  -7  -6    1.68    1.56
  -9  -7   6    2.81    1.66
   9   7  -6    1.69    1.83
  -9   7   6    0.83    1.89
   8  -7  -6    3.96    1.54
  -8  -7   6   -0.76    1.44
   8   7  -6    1.23    1.77
  -8   7   6    2.43    1.81
  -7  -7   6   -4.57    1.15
   7  -7  -6   -0.43    1.31
  -7   7   6   -1.96    1.51
   7   7  -6   -1.67    1.49
   6  -7  -6    6.71    2.56
  -6  -7   6   -0.35    1.11
   6  -7  -6    3.56    1.23
  -6  -7   6    3.89    2.20
  -6   7   6    2.86    1.62
   6   7  -6    4.42    1.58
   5  -7  -6    1.73    2.50
  -5  -7   6    3.97    2.19
   5   7  -6    4.46    1.57
  -5   7   6    6.16    1.52
   4  -7  -6    0.25    0.74
  -4  -7   6    0.58    0.29
   4  -7  -6    0.55    2.41
  -4  -7   6   -0.47    2.13
   4   7  -6    0.28    1.34
   4   7  -6   -0.05    1.29
  -4   7   6   -1.70    1.15
  -4   7   6    1.83    1.36
   3  -7  -6   12.78    1.16
   3  -7  -6    5.70    2.62
   3   7  -6   10.60    1.58
  -3   7   6   11.26    1.58
  -3   7   6   10.69    1.53
   3   7  -6   12.19    1.69
   2  -7  -6   10.66    2.62
   2   7  -6   12.34    1.68
  -2   7   6   11.03    1.53
   2   7  -6   11.23    1.64
  -2   7   6    9.89    1.51
   1  -7  -6   11.96    1.19
  -1   7   6   11.39    1.57
  -1   7   6   12.77    1.63
   1   7  -6   13.77    1.74
   0  -7   6    3.29    1.00
   0  -7  -6    1.59    0.89
   0   7   6    1.24    1.24
   0   7  -6    4.84    1.54
   0   7   6    1.55    1.35
   1  -7   6   21.07    1.89
  -1   7  -6   21.88    2.15
   1   7   6   21.25    2.13
   2  -7   6    1.63    1.12
  -2  -7  -6    0.59    1.09
  -2   7  -6    2.54    1.65
  -3  -7  -6    4.38    1.49
   3  -7   6    5.47    1.38
  -3   7  -6    2.63    1.76
   3   7   6    2.04    1.68
   4  -7   6   34.63    2.58
  -4  -7  -6   33.58    2.66
  -4   7  -6   25.61    2.80
   4   7   6   29.64    2.89
  -5  -7  -6   21.17    2.44
   5  -7   6   29.20    2.47
  -5   7  -6   27.26    2.87
   5   7   6   22.56    2.78
   6  -7   6    1.93    1.60
  -6  -7  -6    1.24    1.63
  -6   7  -6    2.57    2.10
   6   7   6    5.65    2.19
   7  -7   6    3.96    1.75
  -7   7  -6    5.69    2.30
   7   7   6    3.17    2.31
   8  -7   6    4.87    1.90
   8   7   6    3.54    2.32
  -8   7  -6   -0.08    2.07
  -9   7  -6    3.30    2.55
   9   7   6   -0.55    2.35
 -10   7  -6    1.84    2.57
  10   7   6    3.73    2.76
 -11   7  -6    5.57    3.04
  11   7   6    3.10    2.82
 -12   7  -6   11.94    3.47
  12   7   6    9.66    3.32
 -13   7  -6    5.44    3.39
  13   7   6    7.48    3.61
  14   7   6   -0.48    3.51
 -18   8   6    3.38    3.33
  18   8  -6    5.55    3.41
 -17   8   6    2.34    3.16
  17   8  -6    2.37    3.15
 -16   8   6    5.24    3.04
  16   8  -6    4.28    3.08
 -15   8   6   -0.55    2.59
  15   8  -6    2.03    2.77
 -14   8   6   -1.58    2.52
  14   8  -6    2.94    2.71
 -13   8   6   10.79    2.80
  13   8  -6   10.22    2.86
 -12   8   6    8.29    2.55
  12   8  -6    3.47    2.53
 -11   8   6   70.30    4.87
  11   8  -6   71.67    4.90
  10  -8  -6   10.73    1.76
  10   8  -6    5.96    2.33
 -10   8   6    7.42    2.33
   9  -8  -6    3.75    1.53
  -9  -8   6    3.23    1.46
  -9   8   6    2.50    2.05
   9   8  -6    6.12    2.10
   8  -8  -6   14.09    1.71
  -8  -8   6    9.12    1.38
   8   8  -6   13.93    2.23
  -8   8   6   13.55    2.25
  -7  -8   6    0.62    0.36
   7  -8  -6    1.51    0.71
  -7   8   6   -2.07    1.66
   7   8  -6   -0.57    1.63
   6  -8  -6    0.74    2.65
  -6  -8   6    4.95    2.48
  -6  -8   6   -0.53    0.81
   6   8  -6    0.55    1.58
  -6   8   6    2.31    1.59
  -5  -8   6   19.23    2.93
   5  -8  -6   23.36    3.25
  -5   8   6   21.38    2.11
   5   8  -6   22.51    2.10
   5   8  -6   25.01    2.26
  -5   8   6   19.19    1.97
  -4  -8   6    9.83    2.67
   4  -8  -6   10.83    2.87
   4   8  -6   10.52    1.69
  -4   8   6    9.67    1.66
  -4   8   6    8.07    1.53
   4   8  -6   10.33    1.60
   3  -8  -6    3.08    2.76
  -3   8   6    1.50    1.27
   3   8  -6    0.93    1.38
   3   8  -6    1.04    1.30
  -3   8   6    1.95    1.34
   2  -8  -6    2.30    2.63
  -2   8   6   -0.62    1.22
   2   8  -6    2.33    1.40
  -2   8   6    1.62    1.27
   2   8  -6    0.45    1.36
  -1  -8   6    0.83    0.73
  -1   8   6   -0.14    1.31
   1   8  -6   -1.83    1.34
  -1   8   6    3.03    1.27
   1   8  -6   -0.93    1.35
   0   8   6   13.47    1.66
   0   8   6   13.59    1.78
   0   8  -6   14.81    1.90
   1  -8   6    2.47    0.83
   1   8   6    5.07    1.49
   1   8   6    8.31    1.70
  -1   8  -6    6.56    1.68
  -2  -8  -6   93.64    4.27
   2  -8   6   90.60    4.35
  -2   8  -6   90.75    4.88
   3  -8   6   40.26    2.51
  -3   8  -6   37.68    3.15
   3   8   6   36.18    3.16
   4  -8   6    7.98    1.51
   4   8   6    6.16    2.09
  -4   8  -6   10.85    2.19
   5  -8   6    7.12    1.55
  -5   8  -6    5.47    2.18
   5   8   6    3.93    2.09
  -6   8  -6   -2.57    1.96
   6   8   6    2.37    2.08
  -7   8  -6   -0.52    2.14
   7   8   6    1.92    2.29
  -8   8  -6    0.87    2.26
   8   8   6   -0.89    2.35
  -9   8  -6   -2.06    2.33
   9   8   6   -1.09    2.34
  10   8   6    8.55    3.16
 -10   8  -6   14.55    3.18
 -11   8  -6    2.68    2.79
  11   8   6   -0.95    2.92
 -12   8  -6   -0.87    2.99
  12   8   6   -0.63    3.12
  13   8   6    1.96    3.46
 -13   8  -6    1.19    3.27
  18   9  -6    1.09    3.54
 -18   9   6   -3.68    3.02
 -17   9   6   -0.63    2.98
  17   9  -6    3.12    3.41
 -16   9   6    4.77    2.97
  16   9  -6    7.92    3.40
  15   9  -6   20.26    3.66
 -15   9   6   14.53    3.41
 -14   9   6   -2.09    2.53
  14   9  -6    2.13    2.72
  13   9  -6   -1.16    2.65
 -13   9   6    0.45    2.50
 -12   9   6    5.75    2.55
  12   9  -6    4.86    2.61
  11   9  -6    4.59    2.46
 -11   9   6    4.61    2.36
 -10   9   6   14.99    2.63
  10   9  -6   20.83    2.83
  -9   9   6   10.30    2.31
   9   9  -6    7.30    2.28
  -8   9   6   21.14    2.58
   8   9  -6   20.81    2.57
   7  -9  -6   13.83    3.41
  -7   9   6   13.19    2.12
   7   9  -6   14.76    2.21
   6  -9  -6   -3.63    2.85
  -6  -9   6    6.19    2.74
   6   9  -6    0.88    1.65
  -6   9   6   -0.95    1.62
  -5  -9   6    6.69    2.82
   5  -9  -6    5.82    3.02
   5   9  -6    6.51    1.77
   5   9  -6    5.85    1.62
  -5   9   6    7.25    1.53
  -5   9   6    5.76    1.69
   4  -9  -6    5.89    3.05
  -4  -9   6   -2.11    2.58
   4   9  -6    5.49    1.60
  -4   9   6    3.27    1.42
  -4   9   6    4.63    1.50
   4   9  -6    3.66    1.46
   3  -9  -6    9.90    3.18
  -3  -9   6    9.88    3.00
  -3   9   6    9.03    1.63
   3   9  -6   10.73    1.61
  -3   9   6    8.61    1.51
   3   9  -6   11.16    1.76
   2  -9  -6   -2.92    2.83
   2   9  -6   -1.17    1.43
   2   9  -6    1.98    1.45
  -2   9   6    0.46    1.21
  -2   9   6   -1.00    1.27
  -1   9   6    2.94    1.33
   1   9  -6    2.17    1.54
   1   9  -6    2.11    1.48
  -1   9   6    1.55    1.38
   0   9   6   -0.68    1.27
   0   9   6   -1.06    1.40
   0   9  -6    0.66    1.55
   1  -9   6    0.67    0.81
   1   9   6   -1.71    1.50
  -1   9  -6    1.10    1.59
  -2   9  -6    0.13    1.69
   3   9   6   -2.26    1.66
  -3   9  -6   -1.21    1.74
   4   9   6   -2.15    1.86
  -4   9  -6   -0.49    1.84
   5   9   6   -2.59    1.99
  -5   9  -6    0.30    1.96
  -6   9  -6    0.40    2.12
   6   9   6   -0.82    2.08
  -7   9  -6    1.10    2.26
   7   9   6    3.86    2.31
  -8   9  -6    0.68    2.33
   8   9   6   -1.62    2.44
  -9   9  -6   -5.22    2.36
   9   9   6    0.95    2.50
  10   9   6    1.72    2.91
 -10   9  -6    4.68    2.84
 -11   9  -6   -2.00    2.84
  11   9   6   -2.82    2.90
  12   9   6   -0.23    3.20
 -12   9  -6    3.20    3.16
  13   9   6    0.71    3.62
 -13   9  -6   -4.02    2.99
 -17  10   6   -1.47    3.02
  17  10  -6    5.64    3.65
 -16  10   6   14.15    3.55
  16  10  -6   22.78    4.25
 -15  10   6    1.07    2.87
  15  10  -6   -3.41    3.05
 -14  10   6   22.17    3.52
  14  10  -6   24.71    3.79
 -13  10   6    6.03    2.76
  13  10  -6    4.84    2.99
  12  10  -6    1.07    2.58
 -12  10   6    0.14    2.41
 -11  10   6   -0.05    2.27
  11  10  -6    5.15    2.45
  10  10  -6   14.90    2.71
 -10  10   6   11.58    2.55
  -9  10   6   -0.74    1.96
   9  10  -6   -2.05    2.01
   8  10  -6    9.27    2.21
  -8  10   6    6.13    2.16
   7 -10  -6    6.05    3.33
   7  10  -6    4.84    1.92
  -7  10   6    4.52    1.93
  -6 -10   6    3.78    3.02
   6 -10  -6    8.48    3.39
  -6  10   6    2.96    1.81
   6  10  -6    6.54    1.95
  -5 -10   6    2.12    2.90
   5 -10  -6    0.41    3.19
   5  10  -6    0.90    1.68
  -5  10   6   -0.29    1.58
   4 -10  -6    2.81    3.23
  -4 -10   6    2.11    3.03
   4  10  -6    2.66    1.66
  -4  10   6    3.62    1.59
  -3 -10   6   -1.71    2.89
   3 -10  -6    3.30    3.29
  -3  10   6    1.54    1.49
   3  10  -6    0.39    1.51
   2 -10  -6   33.25    4.12
  -2  10   6   34.21    2.59
   2  10  -6   35.71    2.77
  -1  10   6   37.37    2.79
   1  10  -6   32.77    2.71
   0  10   6   20.23    2.09
   0  10  -6   21.71    2.24
   1  10   6   10.22    1.88
  -1  10  -6    9.17    1.94
  -2  10  -6   18.16    2.27
   2  10   6   13.93    2.20
  -3  10  -6    2.89    1.90
   3  10   6   -0.01    1.82
  -4  10  -6    0.25    2.01
   4  10   6    4.45    2.07
   5  10   6   -2.16    2.06
  -5  10  -6    1.78    1.99
  -6  10  -6   14.23    2.68
   6  10   6   14.97    2.73
   7  10   6    2.63    2.37
  -7  10  -6   -0.32    2.31
   8  10   6    0.49    2.57
  -8  10  -6   -3.88    2.35
  -9  10  -6   -0.27    2.56
   9  10   6    1.71    2.62
  10  10   6    2.28    3.03
 -10  10  -6   -0.64    2.68
  11  10   6    4.16    3.41
 -11  10  -6   -1.53    2.89
 -12  10  -6    4.10    3.19
  12  10   6    2.63    3.41
  16  11  -6    2.12    3.38
 -16  11   6   -1.26    2.97
 -15  11   6    1.70    2.92
  15  11  -6    2.34    3.36
  14  11  -6    3.85    3.14
 -14  11   6   10.27    2.97
  13  11  -6   -1.07    2.79
 -13  11   6    9.64    2.88
 -12  11   6    3.80    2.66
  12  11  -6   -3.99    2.56
 -11  11   6   12.51    2.79
  11  11  -6   11.23    2.88
 -10  11   6   -2.20    2.20
  10  11  -6   -0.03    2.33
  -9  11   6   28.44    3.06
   9  11  -6   26.60    3.06
   8 -11  -6   -5.01    3.41
   8  11  -6   -0.20    2.03
  -8  11   6   -0.29    1.92
   7 -11  -6   19.77    3.94
   7  11  -6   20.34    2.48
  -7  11   6   16.46    2.39
   6 -11  -6    0.46    3.39
  -6 -11   6    3.63    3.06
   6  11  -6    3.95    1.98
  -6  11   6    2.89    1.81
   5 -11  -6   -0.55    3.38
  -5 -11   6   -0.75    2.98
   5  11  -6    0.50    1.73
  -5  11   6    0.55    1.64
  -4 -11   6    0.63    3.11
   4 -11  -6    3.85    3.50
  -4  11   6    6.86    1.75
   4  11  -6    5.91    1.82
  -3 -11   6   48.30    4.78
   3 -11  -6   49.92    5.11
  -3  11   6   48.20    3.16
   3  11  -6   51.52    3.28
   2 -11  -6    0.36    3.42
  -2  11   6   -0.12    1.44
   2  11  -6    0.40    1.63
   1  11  -6   -0.55    1.60
  -1  11   6   -3.22    1.41
   0  11  -6    0.06    1.58
   0  11   6    1.08    1.53
   1  11   6   51.00    3.54
  -1  11  -6   55.25    3.57
  -2  11  -6    3.79    1.90
   2  11   6    1.42    1.91
  -3  11  -6    9.79    2.15
   3  11   6   11.34    2.30
  -4  11  -6    2.10    2.07
   4  11   6    1.39    2.15
  -5  11  -6    1.41    2.11
   5  11   6    1.91    2.32
   6  11   6    3.45    2.51
  -6  11  -6    1.56    2.31
  -7  11  -6    6.01    2.49
   7  11   6    3.40    2.67
  -8  11  -6    7.97    2.84
   8  11   6    2.39    2.80
   9  11   6   14.19    3.46
  -9  11  -6    9.05    3.03
  10  11   6    1.45    3.19
 -10  11  -6   -0.04    2.78
  11  11   6    0.98    3.30
 -11  11  -6    0.17    3.00
 -16  12   6    0.14    3.10
  16  12  -6    4.14    3.51
  15  12  -6    9.94    3.68
 -15  12   6    6.95    3.16
  14  12  -6    2.83    3.03
 -14  12   6   -1.24    2.78
 -13  12   6    1.70    2.69
  13  12  -6   -1.65    2.88
 -12  12   6    4.63    2.69
  12  12  -6    3.98    2.86
 -11  12   6   -1.39    2.34
  11  12  -6   -1.00    2.52
 -10  12   6    3.84    2.45
  10  12  -6    6.03    2.59
   9 -12  -6    0.08    3.90
  -9  12   6    2.60    2.26
   9  12  -6    1.61    2.36
   8 -12  -6    4.23    3.69
  -8  12   6    1.03    2.05
   8  12  -6    4.60    2.24
   7 -12  -6    0.55    3.77
   7  12  -6   -5.73    1.85
  -7  12   6   -0.38    1.90
   6 -12  -6    1.43    3.69
  -6 -12   6    5.26    3.34
   6  12  -6    4.55    2.06
  -6  12   6    3.35    1.84
  -5 -12   6   -0.05    3.33
   5 -12  -6   -1.14    3.62
   5  12  -6   -1.52    1.70
  -5  12   6   -0.82    1.66
   4 -12  -6    1.29    3.65
  -4 -12   6    1.65    3.36
   4  12  -6    3.92    1.76
  -4  12   6    3.41    1.64
   3 -12  -6   -2.84    3.60
  -3 -12   6    0.91    3.41
  -3  12   6   -1.83    1.45
   3  12  -6    1.76    1.69
  -2 -12   6   -0.33    3.45
   2 -12  -6    1.69    3.56
  -2  12   6   -0.55    1.46
   2  12  -6    0.05    1.67
  -1  12   6   -1.82    1.48
   1  12  -6   -1.17    1.66
   0  12   6   15.19    2.02
   0  12  -6   14.05    2.09
  -1  12  -6    4.08    1.87
   2  12   6    1.61    2.00
  -2  12  -6   -0.05    1.89
  -3  12  -6    1.62    1.98
   3  12   6    1.24    2.13
  -4  12  -6    2.88    2.20
   4  12   6    2.33    2.32
   5  12   6    0.44    2.41
  -5  12  -6   -2.31    2.14
  -6  12  -6    2.14    2.36
   6  12   6   -0.03    2.56
  -7  12  -6    4.97    2.55
   7  12   6    5.19    2.99
   8  12   6    0.23    2.84
  -8  12  -6    1.30    2.64
   9  12   6    2.32    3.14
  -9  12  -6    2.95    2.87
 -10  12  -6    0.91    2.99
  10  12   6    3.93    3.46
 -15  13   6   -1.73    2.94
  15  13  -6   -0.65    3.37
 -14  13   6   -0.16    2.86
  14  13  -6    2.12    3.28
 -13  13   6    5.98    2.86
  13  13  -6   -1.31    2.95
 -12  13   6    4.59    2.77
  12  13  -6   -3.32    2.72
 -11  13   6    2.26    2.58
  11  13  -6    1.06    2.76
  10 -13  -6   -1.20    4.10
 -10  13   6    5.13    2.56
  10  13  -6    7.19    2.77
   9 -13  -6    2.62    4.06
   9  13  -6   -4.14    2.31
  -9  13   6    0.33    2.16
   8 -13  -6   -1.07    3.91
  -8  13   6    4.01    2.15
   8  13  -6    1.47    2.27
   7 -13  -6    6.16    4.17
  -7  13   6    3.64    2.05
   7  13  -6    1.19    2.20
  -6 -13   6   -2.36    3.47
   6 -13  -6    6.89    4.05
   6  13  -6    0.60    1.99
  -6  13   6    2.43    1.92
   5 -13  -6   -3.68    3.72
  -5 -13   6    1.55    3.62
   5  13  -6    0.73    1.89
  -5  13   6    1.23    1.80
  -4 -13   6    0.28    3.53
   4 -13  -6    5.39    4.07
  -4  13   6    0.07    1.62
   4  13  -6    2.18    1.80
   3 -13  -6    3.18    3.83
  -3 -13   6   -1.39    3.77
   3  13  -6    2.51    1.74
  -3  13   6   -1.16    1.51
   2 -13  -6   24.65    4.57
  -2 -13   6   31.24    4.76
   2  13  -6   26.26    2.47
  -2  13   6   25.32    2.33
  -1 -13   6   25.05    4.76
   1  13  -6   21.33    2.37
  -1  13   6   25.27    2.23
   0  13   6    5.70    1.76
   0  13  -6    3.50    1.88
  -1  13  -6   34.49    3.06
  -2  13  -6    1.53    1.98
   2  13   6    2.86    2.05
   3  13   6    3.60    2.29
  -3  13  -6    1.07    2.09
   4  13   6   -1.28    2.31
  -4  13  -6    2.05    2.22
  -5  13  -6    0.97    2.29
   5  13   6    2.27    2.63
   6  13   6    2.09    2.70
  -6  13  -6    1.28    2.47
   7  13   6    5.02    2.89
  -7  13  -6    0.01    2.55
  -8  13  -6    9.38    2.97
   8  13   6   11.34    3.46
  -9  13  -6    5.63    3.07
   9  13   6    7.21    3.51
  14  14  -6   11.64    3.82
 -14  14   6   12.86    3.45
 -13  14   6   -2.30    2.77
  13  14  -6   -3.08    3.11
 -12  14   6    0.98    2.68
  12  14  -6   -1.52    3.01
  11 -14  -6    3.83    4.53
 -11  14   6    3.44    2.64
  11  14  -6   -2.39    2.83
  10 -14  -6   15.85    4.72
 -10  14   6   14.93    2.91
  10  14  -6   17.36    3.23
   9 -14  -6   23.20    4.90
  -9  14   6   20.70    2.91
   9  14  -6   22.77    3.18
   8 -14  -6   13.96    4.68
  -8  14   6    8.23    2.42
   8  14  -6    6.12    2.61
   7 -14  -6   -1.75    4.23
   7  14  -6   -0.16    2.28
  -7  14   6    0.48    2.05
   6 -14  -6    8.02    4.34
  -6 -14   6   17.07    4.40
   6  14  -6   15.16    2.40
  -6  14   6   13.97    2.29
   5 -14  -6    2.69    4.12
  -5 -14   6   -5.16    3.95
  -5  14   6    4.32    1.86
   5  14  -6    0.75    1.99
  -4 -14   6    4.05    4.01
   4 -14  -6   -3.48    4.13
   4  14  -6    3.27    1.94
  -4  14   6    4.01    1.81
  -3 -14   6    2.03    3.97
   3 -14  -6    2.63    4.14
  -3  14   6   -0.42    1.57
   3  14  -6    0.52    1.86
  -2 -14   6   -0.13    4.05
   2 -14  -6   -4.03    3.78
   2  14  -6    0.55    1.79
  -2  14   6   -0.04    1.60
  -1 -14   6    9.50    4.30
   1  14  -6    5.00    1.91
  -1  14   6    5.86    1.69
   0  14  -6   -2.35    1.77
   0  14   6    1.16    1.73
  -1  14  -6    2.62    2.04
   1  14   6    0.44    2.05
  -2  14  -6   46.84    3.61
  -3  14  -6    3.78    2.28
   3  14   6    1.61    2.34
  -4  14  -6    0.07    2.24
   4  14   6   -1.35    2.44
   5  14   6    2.35    2.74
  -5  14  -6    0.16    2.37
  -6  14  -6    0.19    2.42
   6  14   6    2.63    2.81
  -7  14  -6    4.58    2.85
   7  14   6    6.77    3.16
   8  14   6   15.60    3.77
  -8  14  -6   11.23    3.15
  12 -15  -6    4.30    4.99
  12  15  -6   -1.13    3.16
 -12  15   6    0.37    2.78
  11 -15  -6   13.23    5.23
  11  15  -6   10.23    3.19
 -11  15   6    5.88    2.81
  10 -15  -6   -3.47    4.62
  10  15  -6    0.80    2.78
 -10  15   6    3.85    2.59
   9 -15  -6    6.58    4.76
  -9  15   6    6.22    2.53
   9  15  -6    8.44    2.89
   8 -15  -6   -1.66    4.46
  -8  15   6   -1.21    2.18
   8  15  -6    0.39    2.51
   7 -15  -6    8.13    4.82
   7  15  -6    9.67    2.55
  -7  15   6    7.22    2.23
   6 -15  -6    7.01    4.60
  -6 -15   6    4.93    4.07
   6  15  -6   11.77    2.50
  -6  15   6    7.39    2.21
  -5 -15   6   -2.16    4.12
   5 -15  -6    0.28    4.43
  -5  15   6   -2.31    1.77
   5  15  -6    2.40    2.05
  -4 -15   6   16.80    4.65
   4 -15  -6    7.19    4.81
   4  15  -6   19.78    2.35
  -3 -15   6    3.88    4.39
   3 -15  -6    0.58    4.34
   3  15  -6    0.27    1.93
  -2 -15   6    3.03    4.48
   2 -15  -6   -3.72    4.11
   2  15  -6   -0.83    1.82
  -1 -15   6    9.95    4.58
  -1  15   6    9.58    1.90
   1  15  -6    4.78    1.94
   0 -15   6    4.05    4.54
   0  15  -6    3.11    1.93
  -1  15  -6   20.57    2.49
  -2  15  -6   -0.15    2.15
   2  15   6    1.27    2.33
   3  15   6    3.17    2.50
  -3  15  -6    8.62    2.35
  -4  15  -6    1.38    2.28
   4  15   6    9.12    2.74
   5  15   6   14.51    3.12
  -5  15  -6    7.03    2.65
  -6  15  -6    2.85    2.69
   6  15   6    5.87    2.97
  -7  15  -6    1.27    2.83
   7  15   6    6.00    3.35
  11 -16  -6   -1.49    4.98
 -11  16   6    0.98    2.55
  10 -16  -6   -7.00    4.80
  10  16  -6    2.14    2.93
 -10  16   6    1.73    2.54
   9 -16  -6    2.88    4.94
   9  16  -6    1.00    2.73
  -9  16   6    0.57    2.37
   8 -16  -6    4.99    4.89
  -8  16   6    2.29    2.30
   8  16  -6    6.32    2.70
   7 -16  -6   -3.51    4.56
  -7  16   6    0.14    2.12
   7  16  -6    2.16    2.48
   6 -16  -6   -0.54    4.81
  -6 -16   6   -1.73    4.26
  -6  16   6   -2.73    1.96
   6  16  -6    1.49    2.23
   5 -16  -6   -4.04    4.71
  -5 -16   6    1.05    4.41
   5  16  -6   -0.39    2.12
  -5  16   6   -1.05    1.88
  -4 -16   6    1.24    4.69
   4 -16  -6   -1.51    4.67
   4  16  -6    4.48    2.03
  -3 -16   6   -3.39    4.33
   3 -16  -6    1.22    4.64
   3  16  -6    2.02    1.88
  -2 -16   6    4.28    4.79
   2  16  -6    6.55    1.91
  -1 -16   6    4.56    4.81
   1  16  -6    1.43    1.89
   0 -16   6    7.67    4.85
   0  16  -6   -1.80    1.91
   1 -16   6    2.10    4.88
   1  16   6    2.11    2.16
  -1  16  -6   -0.74    1.92
   2  16   6    8.72    2.44
  -2  16  -6    1.49    2.19
   3  16   6   -0.78    2.44
  -3  16  -6   -1.57    2.23
   4  16   6    0.86    2.65
  -4  16  -6    6.21    2.55
   5  16   6   -3.49    2.73
  -5  16  -6    1.76    2.45
   8 -17  -6    0.80    5.31
   8  17  -6    2.19    2.65
  -8  17   6   -1.70    2.21
   7 -17  -6   -6.57    4.90
  -7  17   6    1.57    2.20
   7  17  -6    4.46    2.59
   6 -17  -6   -6.64    4.96
   6  17  -6    2.44    2.34
  -6  17   6   -2.06    2.07
   5 -17  -6   -2.08    5.17
  -5 -17   6   -4.92    4.72
   4 -17  -6   14.86    5.50
  -4 -17   6   26.37    5.86
  -3 -17   6    7.49    5.23
   3 -17  -6    3.07    4.95
  -2 -17   6   -4.09    5.03
   2  17  -6    2.92    1.82
  -1 -17   6   -7.81    4.74
   1  17  -6    0.36    1.83
   0 -17   6    5.23    5.30
   0  17  -6    0.40    1.91
   1 -17   6   -5.67    4.99
  -1  17  -6    9.73    2.25
   2 -17   6   -0.23    5.39
  -2  17  -6   -1.56    2.19
  -3  17  -6    3.43    2.32
   3  17   6    5.83    2.62
   5 -18  -6   -8.69    5.31
   4 -18  -6    8.49    5.53
  -4 -18   6   -1.03    5.10
  -3 -18   6   11.04    5.57
   3 -18  -6   -2.95    4.88
  -2 -18   6    1.83    5.41
  -1 -18   6    2.53    5.39
 -20   0   7    1.58    3.34
  20   0  -7   -2.87    3.42
  19   0  -7   -1.19    3.31
 -19   0   7    3.24    3.22
  18   0  -7    4.60    3.19
 -18   0   7   -1.61    3.13
  17   0  -7   -3.88    2.81
 -17   0   7   -5.15    2.76
  16   0  -7   -1.88    2.57
 -16   0   7    2.87    2.86
 -15   0   7    2.62    2.59
  15   0  -7    0.34    2.54
  14   0  -7   -2.23    2.28
 -14   0   7   -0.83    2.45
 -13   0   7    2.18    2.37
  13   0  -7    0.22    2.23
 -12   0   7   -0.98    2.10
  12   0  -7   -1.18    1.98
 -11   0   7    1.10    2.07
  11   0  -7   -1.01    1.82
 -10   0   7    0.96    1.90
  10   0  -7   -0.85    1.74
   9   0  -7    0.52    1.67
  -9   0   7    0.76    1.75
  -8   0   7    2.22    1.71
   8   0  -7    0.30    1.65
   7   0  -7   -0.59    1.55
  -7   0   7   -0.72    1.56
  -6   0   7   -0.53    1.55
   6   0  -7    0.26    1.47
   5   0  -7    0.10    1.54
  -5   0   7    0.83    1.52
  -4   0   7    0.36    1.43
   4   0  -7   -0.15    1.50
   3   0  -7    0.83    1.47
  -3   0   7   -2.65    1.33
   2   0  -7    0.40    1.47
  -2   0   7   -0.76    1.35
  -1   0   7    1.90    1.43
   1   0  -7   -2.41    1.40
   0   0  -7    1.66    1.53
   0   0   7   -1.68    1.34
   1   0   7   -1.18    1.39
  -1   0  -7   -0.89    1.57
   2   0   7    0.54    1.50
  -2   0  -7   -0.16    1.59
   3   0   7   -1.92    1.47
  -3   0  -7    1.23    1.74
  -4   0  -7    0.46    1.89
   4   0   7    0.91    1.69
  -5   0  -7    4.15    2.05
   5   0   7   -0.67    1.72
  -6   0  -7    0.15    2.09
   6   0   7    0.46    1.88
  -7   0  -7   -1.23    2.26
   7   0   7   -1.94    1.99
  -8   0  -7    5.08    2.64
   8   0   7   -0.84    2.03
   9   0   7   -1.79    2.20
  -9   0  -7    2.04    2.58
 -10   0  -7   -5.05    2.50
  10   0   7    2.66    2.59
  11   0   7    6.81    3.00
 -11   0  -7    0.56    2.97
  12   0   7   -3.78    2.82
 -12   0  -7   -3.56    2.97
 -13   0  -7   -4.95    3.17
  13   0   7   -2.40    3.06
  14   0   7    0.48    3.28
 -14   0  -7   -2.29    3.30
 -20  -1   7   -0.86    3.13
  20  -1  -7    3.48    3.53
 -20   1   7   -6.41    3.23
  20   1  -7    6.12    3.78
 -19  -1   7    4.99    3.30
  19  -1  -7   12.72    3.90
  19   1  -7   19.82    4.19
 -19   1   7   12.43    4.01
  18  -1  -7   14.32    3.62
 -18  -1   7   17.72    3.85
  18   1  -7   12.75    3.67
 -18   1   7   16.14    3.96
 -17  -1   7    0.67    2.77
  17  -1  -7    3.80    2.93
 -17   1   7    4.49    3.20
  17   1  -7    3.66    3.08
 -16  -1   7    4.66    2.92
  16  -1  -7    6.70    2.96
  16   1  -7    8.63    3.12
 -16   1   7    4.22    3.06
 -15  -1   7    3.28    2.68
  15  -1  -7   -2.13    2.42
  15   1  -7    6.78    2.82
 -15   1   7    5.29    2.90
  14  -1  -7   40.61    4.10
 -14  -1   7   39.79    4.03
 -14   1   7   47.48    4.33
  14   1  -7   47.27    4.26
 -13  -1   7   12.70    2.75
  13  -1  -7   18.73    2.91
 -13   1   7   19.54    3.09
  13   1  -7   19.09    3.04
  12  -1  -7   36.59    3.47
 -12  -1   7   34.85    3.51
 -12   1   7   38.18    3.53
  12   1  -7   30.22    3.40
  11  -1  -7    2.41    2.05
 -11  -1   7    2.58    2.08
  11   1  -7   -0.13    1.95
 -11   1   7    2.07    2.12
  10  -1  -7    9.28    2.10
 -10  -1   7    5.31    2.11
 -10   1   7    7.88    2.14
  10   1  -7    5.81    1.99
  -9  -1   7   -1.22    1.69
   9  -1  -7    1.15    1.70
  -9   1   7    0.25    1.72
   9   1  -7    1.76    1.76
   8  -1  -7    1.42    1.66
  -8  -1   7    2.47    1.72
   8   1  -7    0.90    1.64
  -8   1   7    2.53    1.75
  -7  -1   7   16.68    2.18
   7  -1  -7   15.00    2.16
  -7   1   7   18.15    2.19
   7   1  -7   14.84    2.13
   6  -1  -7   14.61    1.98
  -6  -1   7   13.21    2.03
   6   1  -7   14.95    2.00
  -6   1   7   15.59    2.04
  -5  -1   7    3.41    1.58
   5  -1  -7    5.59    1.64
  -5   1   7    5.06    1.58
   5   1  -7    5.87    1.59
   4  -1  -7   39.39    2.85
  -4  -1   7   37.57    2.80
  -4   1   7   38.40    2.84
   4   1  -7   42.83    2.95
  -3  -1   7  307.39   12.73
   3  -1  -7  296.03   12.72
  -3   1   7  298.21   12.70
   3   1  -7  304.58   12.75
  -2  -1   7  426.14   17.74
   2  -1  -7  417.06   17.75
   2   1  -7  435.24   17.77
  -2   1   7  439.59   17.76
   1  -1  -7   21.46    2.20
  -1  -1   7   26.66    2.27
  -1   1   7   22.07    2.13
   1   1  -7   24.92    2.23
   0  -1  -7    3.29    1.62
   0  -1   7    4.62    1.59
   0   1   7    3.52    1.57
   0   1  -7    1.14    1.50
   1  -1   7   33.97    2.68
  -1  -1  -7   29.66    2.66
  -1   1  -7   34.99    2.75
   2  -1   7   42.32    3.06
  -2  -1  -7   38.97    2.99
  -2   1  -7   40.85    3.21
   2   1   7   41.88    3.03
  -3  -1  -7    2.61    1.79
   3  -1   7    3.67    1.70
  -3   1  -7    4.39    1.82
   3   1   7    7.25    1.71
   4  -1   7  117.68    6.06
  -4  -1  -7  118.17    6.13
   4   1   7  129.06    6.19
  -4   1  -7  119.65    6.21
  -5  -1  -7    0.25    2.03
   5  -1   7   -0.56    1.69
  -5   1  -7    3.66    2.14
   5   1   7    1.57    1.84
   6  -1   7   19.83    2.57
  -6  -1  -7   21.37    2.82
   6   1   7   16.08    2.56
  -6   1  -7   18.58    2.81
  -7  -1  -7   15.71    2.88
   7  -1   7   14.88    2.57
   7   1   7   13.45    2.55
  -7   1  -7   14.85    2.68
   8  -1   7    2.38    2.10
  -8  -1  -7   -3.17    2.30
  -8   1  -7   -6.67    2.21
   8   1   7   -1.42    2.08
   9  -1   7   13.26    2.88
  -9  -1  -7   10.12    2.93
  -9   1  -7   11.97    2.96
   9   1   7   11.42    2.76
 -10  -1  -7   -5.90    2.56
  10  -1   7    0.90    2.51
 -10   1  -7    4.31    2.89
  10   1   7    3.90    2.64
 -11  -1  -7    4.63    3.13
  11  -1   7    8.25    2.90
 -11   1  -7    4.57    3.13
  11   1   7    1.82    2.78
  12  -1   7   14.94    3.53
 -12  -1  -7    9.97    3.54
 -12   1  -7    9.96    3.53
  12   1   7   14.50    3.46
  13  -1   7    6.49    3.31
 -13  -1  -7    5.10    3.48
 -13   1  -7    5.56    3.51
  13   1   7    1.00    3.19
 -14  -1  -7   -3.90    3.24
  14  -1   7    4.56    3.50
 -14   1  -7   -2.00    3.47
  14   1   7   -1.58    3.31
  20  -2  -7    2.27    3.52
 -20  -2   7    5.01    3.46
 -20   2   7    4.47    3.85
  20   2  -7   12.85    4.08
  19  -2  -7    1.97    3.14
 -19  -2   7    2.03    3.10
  19   2  -7    3.34    3.45
 -19   2   7   -1.63    3.46
  18  -2  -7   42.29    4.88
 -18  -2   7   44.79    4.86
  18   2  -7   45.44    5.17
 -18   2   7   43.05    5.10
 -17  -2   7    3.84    2.81
  17  -2  -7   -2.65    2.76
  17   2  -7    3.88    3.14
 -17   2   7    2.76    3.12
 -16  -2   7   22.57    3.77
  16  -2  -7   25.69    3.80
 -16   2   7   32.43    4.09
  16   2  -7   39.13    4.37
  15  -2  -7   13.13    2.95
 -15  -2   7    4.48    2.64
 -15   2   7   13.28    3.16
  15   2  -7   12.26    3.03
  14  -2  -7   -0.76    2.15
 -14  -2   7    1.54    2.54
 -14   2   7   -5.03    2.33
  14   2  -7    0.69    2.35
  13  -2  -7   30.26    3.43
 -13  -2   7   31.24    3.39
  13   2  -7   27.20    3.37
 -13   2   7   30.52    3.56
 -12  -2   7    3.87    2.31
  12  -2  -7    2.81    2.10
  12   2  -7    0.09    2.11
 -12   2   7    3.36    2.25
  11  -2  -7    0.42    1.92
 -11  -2   7   -1.85    1.94
 -11   2   7   -1.33    1.92
  11   2  -7    0.37    1.93
 -10  -2   7    9.77    2.25
  10  -2  -7   12.09    2.21
  10   2  -7   10.18    2.22
 -10   2   7   10.40    2.24
   9  -2  -7   37.03    2.99
  -9  -2   7   31.14    2.86
  -9   2   7   27.66    2.82
   9   2  -7   26.83    2.74
   8  -2  -7   34.68    2.87
  -8  -2   7   32.03    2.82
   8   2  -7   26.61    2.65
  -8   2   7   36.89    2.90
   7  -2  -7   87.69    4.81
  -7  -2   7   90.12    4.80
  -7   2   7   94.48    4.86
   7   2  -7   96.33    4.89
   6  -2  -7    3.39    1.62
   6  -2  -7    3.09    1.37
  -6  -2   7    1.26    1.61
   6   2  -7    3.05    1.63
  -6   2   7    4.52    1.62
   5  -2  -7   51.32    3.36
  -5  -2   7   52.98    3.33
  -5   2   7   56.90    3.42
   5   2  -7   59.34    3.43
   4  -2  -7    4.16    1.58
  -4  -2   7    3.07    1.47
  -4   2   7    2.36    1.41
   4   2  -7    2.21    1.51
  -3  -2   7   37.80    2.75
   3  -2  -7   32.11    2.66
   3   2  -7   34.28    2.73
  -3   2   7   32.87    2.56
  -2  -2   7    2.55    1.46
   2  -2  -7   -0.03    1.40
  -2   2   7    1.17    1.37
   2   2  -7    0.80    1.38
  -1  -2   7   97.05    4.74
   1  -2  -7   88.59    4.67
   1   2  -7   98.79    4.74
  -1   2   7   93.97    4.74
   0  -2  -7    7.87    1.66
   0   2  -7    5.49    1.62
   0   2   7    6.04    1.55
   1  -2   7    0.72    1.43
  -1  -2  -7    0.16    1.56
   1   2   7    0.79    1.52
  -1   2  -7    0.97    1.59
  -2  -2  -7  161.24    7.62
   2  -2   7  172.95    7.68
   2   2   7  166.69    7.70
  -2   2  -7  167.04    7.66
   3  -2   7    5.07    1.71
  -3  -2  -7    4.07    1.84
  -3   2  -7    3.14    1.75
   3   2   7    3.06    1.66
  -4  -2  -7    4.55    2.01
   4  -2   7    7.08    1.84
   4   2   7    3.30    1.81
  -4   2  -7    4.88    2.04
  -5  -2  -7   32.89    3.26
   5  -2   7   36.14    3.10
  -5   2  -7   33.89    3.22
   5   2   7   33.51    3.11
  -6  -2  -7    1.69    2.06
   6  -2   7   -1.40    1.78
   6   2   7    1.28    1.85
  -6   2  -7   -2.55    2.02
  -7  -2  -7   31.92    3.52
   7  -2   7   38.09    3.43
   7   2   7   35.31    3.53
  -7   2  -7   35.75    3.64
   8  -2   7    7.31    2.36
  -8  -2  -7    5.93    2.66
   8   2   7    4.94    2.45
  -8   2  -7    3.89    2.52
  -9  -2  -7    4.76    2.65
   9  -2   7    1.63    2.32
   9   2   7   -2.05    2.17
  -9   2  -7    0.77    2.57
  10  -2   7   37.36    3.92
 -10  -2  -7   29.85    3.96
 -10   2  -7   28.79    3.81
  10   2   7   31.28    3.89
 -11  -2  -7    6.83    3.05
  11  -2   7    6.57    2.91
  11   2   7    2.90    2.89
 -11   2  -7    7.81    3.15
 -12  -2  -7    9.65    3.40
  12  -2   7    1.38    3.07
 -12   2  -7    1.99    3.26
  12   2   7    1.05    2.99
  13  -2   7    2.71    3.22
 -13  -2  -7   -1.60    3.11
 -13   2  -7    4.81    3.57
  13   2   7   -1.68    3.14
 -14  -2  -7   -4.93    3.09
  14  -2   7   -3.53    3.00
 -14   2  -7   -1.43    3.45
  14   2   7    5.18    3.52
  20  -3  -7   14.98    4.12
 -20   3   7   10.55    4.09
  20   3  -7    4.63    3.99
 -19  -3   7    0.67    3.00
  19  -3  -7    5.03    3.31
 -19   3   7   12.42    3.90
  19   3  -7    4.61    3.57
  18  -3  -7    4.89    3.02
 -18  -3   7    3.87    3.04
 -18   3   7   -0.92    3.18
  18   3  -7   -2.35    3.21
  17  -3  -7    1.52    2.80
 -17  -3   7    3.81    3.00
 -17   3   7   -0.84    2.96
  17   3  -7    5.67    3.16
 -16  -3   7    7.28    2.93
  16  -3  -7   14.62    3.18
  16   3  -7   10.36    3.24
 -16   3   7    9.43    3.32
 -15  -3   7    1.49    2.51
  15  -3  -7    2.23    2.55
  15   3  -7    0.94    2.65
 -15   3   7   -1.57    2.52
  14  -3  -7   -0.16    2.33
 -14  -3   7    5.28    2.51
 -14   3   7    1.68    2.53
  14   3  -7    0.10    2.48
 -13  -3   7    0.17    2.29
  13  -3  -7   -1.47    2.16
 -13   3   7    1.80    2.32
  13   3  -7    5.97    2.49
 -12  -3   7    1.68    2.20
  12  -3  -7    1.55    2.12
 -12   3   7    3.63    2.27
  12   3  -7   -0.76    2.10
  11  -3  -7   32.11    3.14
 -11  -3   7   34.16    3.24
  11   3  -7   36.31    3.34
 -11   3   7   33.68    3.25
  10  -3  -7   -0.07    1.80
 -10  -3   7   -2.16    1.84
 -10   3   7    0.39    1.80
  10   3  -7    1.73    1.85
   9  -3  -7    3.80    1.80
  -9  -3   7    0.62    1.80
  -9   3   7    2.16    1.83
   9   3  -7    3.48    1.81
  -8  -3   7   50.30    3.42
   8  -3  -7   47.83    3.40
   8   3  -7   48.93    3.36
  -8   3   7   51.34    3.50
   7  -3  -7    3.33    1.62
  -7  -3   7    3.87    1.70
   7   3  -7    2.69    1.58
  -7   3   7    4.24    1.65
   6  -3  -7   28.43    2.25
  -6  -3   7   23.05    2.27
   6  -3  -7   22.03    2.27
  -6   3   7   26.34    2.35
   6   3  -7   18.90    2.25
   5  -3  -7   20.47    2.10
   5  -3  -7   16.80    2.07
  -5  -3   7   21.29    2.05
  -5   3   7   19.65    2.07
   5   3  -7   16.39    1.97
  -4  -3   7   31.79    2.69
   4  -3  -7   31.62    2.63
   4   3  -7   32.17    2.65
  -4   3   7   32.76    2.61
  -3  -3   7    8.24    1.58
   3  -3  -7    4.58    1.60
  -3   3   7    8.31    1.55
   3   3  -7    8.17    1.61
  -2  -3   7   67.49    3.73
   2  -3  -7   61.91    3.70
  -2   3   7   74.05    3.89
   2   3  -7   69.51    3.81
  -1  -3   7   25.29    2.15
   1  -3  -7   21.94    2.12
   1   3  -7   20.34    2.10
  -1   3   7   20.18    2.03
   0  -3   7   -0.44    1.35
   0  -3  -7    0.27    1.45
   0   3  -7   -0.18    1.45
   0   3   7    0.98    1.38
   1  -3   7    5.98    1.55
  -1  -3  -7    5.29    1.67
   1   3   7    5.55    1.63
  -1   3  -7    6.61    1.70
  -2  -3  -7    3.23    1.68
   2  -3   7   -0.80    1.41
  -2   3  -7   -1.44    1.51
   2   3   7    1.63    1.47
   3  -3   7    8.57    1.80
  -3  -3  -7    9.25    2.02
  -3   3  -7    9.31    1.99
   3   3   7    6.68    1.71
  -4  -3  -7   26.88    2.80
   4  -3   7   32.32    2.76
  -4   3  -7   31.02    2.87
   4   3   7   28.83    2.78
  -5  -3  -7    2.91    2.01
   5  -3   7    1.63    1.73
   5   3   7    3.20    1.87
  -5   3  -7   -0.30    1.92
  -6  -3  -7    1.51    2.20
   6  -3   7    6.17    2.08
  -6   3  -7    4.58    2.26
   6   3   7    4.57    2.09
  -7  -3  -7    1.80    2.33
   7  -3   7    1.59    1.93
  -7   3  -7   -0.56    2.25
   7   3   7    1.33    2.14
  -8  -3  -7   17.99    3.03
   8  -3   7   16.46    2.77
  -8   3  -7   15.54    2.86
   8   3   7   10.66    2.59
   9  -3   7   19.98    3.08
  -9  -3  -7   22.29    3.36
  -9   3  -7   21.64    3.42
   9   3   7   25.40    3.24
  10  -3   7   10.33    2.81
 -10  -3  -7    8.63    2.99
 -10   3  -7    9.44    3.07
  10   3   7    3.83    2.61
 -11  -3  -7    2.14    2.85
  11  -3   7    2.48    2.80
  11   3   7    2.71    2.97
 -11   3  -7   -3.47    2.83
  12  -3   7    9.69    3.34
 -12  -3  -7    1.17    3.06
 -12   3  -7    3.70    3.20
  12   3   7    6.88    3.27
  13  -3   7   -1.11    2.93
  13   3   7    4.44    3.29
 -13   3  -7    3.69    3.47
  14  -3   7    2.22    3.31
 -14   3  -7   -1.76    3.36
  14   3   7   -1.25    3.38
 -20   4   7    1.00    3.65
  20   4  -7    5.26    3.87
  19  -4  -7    2.66    3.05
 -19   4   7   -3.28    3.22
  19   4  -7    4.94    3.66
 -18  -4   7    7.38    2.94
  18  -4  -7    0.89    2.88
  18   4  -7    3.94    3.36
 -18   4   7    5.51    3.35
 -17  -4   7    0.57    2.49
  17  -4  -7    3.41    2.90
 -17   4   7    5.43    3.25
  17   4  -7    3.40    3.22
  16  -4  -7    5.17    2.82
 -16  -4   7    2.06    2.53
  16   4  -7    3.60    3.01
 -16   4   7    2.79    2.90
 -15  -4   7    3.80    2.45
  15  -4  -7    1.49    2.40
  15   4  -7    2.57    2.71
 -15   4   7    5.93    2.81
  14  -4  -7    0.35    2.30
 -14  -4   7    1.41    2.28
 -14   4   7   -0.07    2.52
  14   4  -7    2.69    2.58
 -13  -4   7   24.26    3.09
  13  -4  -7   21.68    2.98
  13   4  -7   17.32    3.10
 -13   4   7   24.91    3.21
 -12  -4   7   -0.88    2.20
  12  -4  -7    4.69    2.19
 -12   4   7    0.62    2.17
  12   4  -7    1.88    2.18
  11  -4  -7    8.20    2.22
 -11  -4   7    8.32    2.25
  11   4  -7    5.05    2.22
 -11   4   7    3.98    2.29
 -10  -4   7   10.59    2.32
  10  -4  -7   16.09    2.33
 -10   4   7   12.09    2.31
  10   4  -7   10.28    2.22
   9  -4  -7   23.04    2.55
  -9  -4   7   22.04    2.54
   9   4  -7   18.74    2.48
  -9   4   7   23.89    2.55
  -8  -4   7   -2.19    1.60
   8  -4  -7    0.65    1.56
  -8   4   7    1.40    1.65
   8   4  -7    2.17    1.66
   7  -4  -7    1.12    1.55
  -7  -4   7   -0.54    1.52
   7   4  -7    2.27    1.60
  -7   4   7    1.26    1.56
   6  -4  -7    2.40    1.54
   6  -4  -7    4.71    1.88
  -6  -4   7    4.45    1.60
  -6   4   7    7.28    1.64
   6   4  -7    5.05    1.65
   5  -4  -7   34.32    3.02
   5  -4  -7   33.49    2.66
  -5  -4   7   28.68    2.53
  -5  -4   7   34.67    2.71
   5   4  -7   33.64    2.68
  -5   4   7   35.92    2.71
  -4  -4   7   10.82    1.72
   4  -4  -7   11.05    1.73
  -4   4   7   11.97    1.73
   4   4  -7   11.45    1.81
   3  -4  -7    8.47    1.61
  -3  -4   7    6.02    1.51
   3   4  -7    9.52    1.63
  -3   4   7    8.95    1.58
  -2  -4   7   45.86    2.91
   2  -4  -7   46.21    2.89
   2   4  -7   47.49    3.04
  -2   4   7   42.47    2.99
   1  -4  -7   19.26    2.03
   1   4  -7   23.76    2.21
  -1   4   7   24.79    2.18
   0  -4  -7    3.04    1.47
   0  -4   7    5.69    1.44
   0   4   7    3.97    1.50
   0   4  -7    4.23    1.57
   1  -4   7    9.13    1.68
  -1  -4  -7   10.05    1.79
   1   4   7    9.24    1.73
  -1   4  -7   10.45    1.82
   2  -4   7    6.55    1.64
  -2  -4  -7    5.17    1.72
  -2   4  -7    4.28    1.73
   2   4   7    5.84    1.61
  -3  -4  -7    5.59    1.90
   3  -4   7    6.34    1.69
  -3   4  -7    9.09    2.00
   3   4   7    3.88    1.71
  -4  -4  -7    0.66    1.83
   4  -4   7   -0.96    1.54
   4   4   7    2.73    1.75
  -4   4  -7    1.26    1.84
   5  -4   7    9.38    2.04
  -5  -4  -7   12.33    2.40
   5   4   7    9.79    2.21
  -5   4  -7   10.78    2.36
  -6  -4  -7   10.82    2.40
   6  -4   7   12.97    2.22
   6   4   7    6.16    2.25
  -6   4  -7    8.35    2.35
   7  -4   7   -3.82    1.81
  -7  -4  -7   -2.55    2.17
  -7   4  -7    2.39    2.28
   7   4   7   -1.40    2.08
   8  -4   7    1.51    2.10
  -8  -4  -7   -0.39    2.30
   8   4   7   -0.72    2.11
  -8   4  -7   -0.98    2.22
  -9  -4  -7    0.70    2.39
   9  -4   7    2.20    2.22
   9   4   7    2.98    2.35
  -9   4  -7    1.35    2.49
 -10  -4  -7    2.37    2.37
  10  -4   7    0.40    2.47
 -10   4  -7   -0.57    2.66
  10   4   7   -2.63    2.40
 -11  -4  -7    6.35    2.85
  11  -4   7   16.80    3.17
  11   4   7    9.84    3.25
 -11   4  -7   15.99    3.43
  12  -4   7    5.26    3.02
 -12   4  -7   -0.82    2.99
  12   4   7    5.17    3.20
  13  -4   7    0.67    2.94
 -13   4  -7    2.54    3.36
  13   4   7   -2.47    3.11
  14   4   7    2.80    3.61
 -14   4  -7   -0.86    3.48
  20   5  -7    5.00    3.98
 -20   5   7   -3.37    3.45
 -19   5   7   13.78    4.06
  19   5  -7   16.68    4.41
 -18   5   7    4.84    3.31
  18   5  -7    1.58    3.39
  17  -5  -7    6.34    2.74
  17   5  -7    5.73    3.29
 -17   5   7   10.01    3.45
  16  -5  -7    4.36    2.49
 -16  -5   7   -0.51    2.13
  16   5  -7   -1.42    2.86
 -16   5   7    0.86    2.83
 -15  -5   7   25.32    3.18
  15  -5  -7   24.70    3.18
 -15   5   7   24.11    3.55
  15   5  -7   15.37    3.45
  14  -5  -7   22.42    2.97
 -14  -5   7   21.10    2.96
  14   5  -7   15.12    3.13
 -14   5   7   13.55    3.09
 -13  -5   7    2.88    2.11
  13  -5  -7    2.74    2.18
  13   5  -7    3.87    2.44
 -13   5   7   -0.14    2.40
  12  -5  -7   -2.88    1.90
 -12  -5   7    4.84    2.21
  12   5  -7    2.59    2.30
 -12   5   7    3.03    2.27
 -11  -5   7   39.51    3.39
  11  -5  -7   34.90    3.25
  11   5  -7   40.34    3.55
 -11   5   7   36.33    3.52
 -10  -5   7   19.65    2.57
  10  -5  -7   26.82    2.67
 -10   5   7   21.86    2.72
  10   5  -7   20.10    2.70
  -9  -5   7   20.20    2.44
   9  -5  -7   24.79    2.54
   9   5  -7   22.49    2.63
  -9   5   7   21.00    2.54
  -8  -5   7    3.19    1.69
   8  -5  -7    1.19    1.58
   8   5  -7    1.72    1.72
  -8   5   7    1.08    1.73
   7  -5  -7   37.34    3.26
  -7  -5   7   31.46    2.82
   7  -5  -7   39.67    2.86
  -7   5   7   37.26    2.99
   7   5  -7   35.36    2.98
   6  -5  -7    2.87    2.01
   6  -5  -7   -0.90    1.45
  -6  -5   7    2.25    1.44
  -6  -5   7    1.88    1.70
  -6   5   7   -1.53    1.42
   6   5  -7    1.44    1.56
  -5  -5   7    5.21    1.76
   5  -5  -7    5.31    1.55
  -5  -5   7    7.38    1.59
   5  -5  -7    6.04    2.13
  -5   5   7    6.11    1.61
   5   5  -7    6.92    1.63
  -4  -5   7   -0.36    1.30
   4  -5  -7    0.01    1.99
   4  -5  -7    1.62    1.37
  -4   5   7   -0.11    1.34
   4   5  -7    1.25    1.48
   3  -5  -7   16.55    1.80
  -3  -5   7   13.82    1.70
   3   5  -7   14.70    1.87
  -3   5   7   15.92    1.80
   2  -5  -7    3.91    1.41
  -2   5   7    3.95    1.39
   2   5  -7    4.10    1.47
   1  -5  -7    3.81    1.42
  -1  -5   7    4.31    1.31
   1   5  -7    3.58    1.51
  -1   5   7    2.71    1.41
   0  -5   7   33.38    2.47
   0  -5  -7   29.70    2.46
   0   5   7   33.70    2.66
   0   5  -7   34.08    2.79
   1  -5   7  116.06    5.33
  -1  -5  -7  108.47    5.30
   1   5   7  104.45    5.43
  -1   5  -7  111.96    5.46
  -2  -5  -7   54.75    3.37
   2  -5   7   50.91    3.29
  -2   5  -7   53.01    3.54
  -3  -5  -7   28.10    2.59
   3  -5   7   24.17    2.36
   3   5   7   21.48    2.48
  -3   5  -7   30.88    2.73
   4  -5   7   31.09    2.74
  -4  -5  -7   34.72    3.05
  -4   5  -7   37.53    3.30
   4   5   7   29.20    2.98
   5  -5   7   12.36    2.06
  -5  -5  -7   17.57    2.49
  -5   5  -7   12.99    2.49
   5   5   7   11.73    2.33
  -6  -5  -7   13.14    2.50
   6  -5   7   10.07    2.21
   6   5   7   13.79    2.51
  -6   5  -7   10.33    2.48
   7  -5   7   20.77    2.75
  -7  -5  -7   16.78    2.74
   7   5   7   19.68    2.92
  -7   5  -7   20.64    3.00
  -8  -5  -7   31.71    3.18
   8  -5   7   28.09    3.08
   8   5   7   22.43    3.17
  -8   5  -7   19.81    3.04
  -9  -5  -7   30.50    3.31
   9  -5   7   25.58    3.17
   9   5   7   22.33    3.37
  -9   5  -7   26.64    3.54
  10  -5   7    0.82    2.45
 -10   5  -7    1.14    2.79
  10   5   7    4.63    2.71
  11  -5   7   -2.68    2.47
  11   5   7    2.06    2.81
 -11   5  -7   -0.70    2.84
  12  -5   7   21.99    3.47
  12   5   7   14.00    3.70
 -12   5  -7   12.26    3.62
  13   5   7    2.13    3.31
 -13   5  -7    9.03    3.55
  14   5   7    2.66    3.73
  19   6  -7   -0.41    3.61
 -19   6   7    6.48    3.67
  18   6  -7   31.03    4.87
 -18   6   7   34.82    4.69
  17   6  -7   -0.22    3.06
 -17   6   7   -3.59    2.93
 -16   6   7    3.36    2.93
  16   6  -7    1.45    2.98
  15  -6  -7    4.93    2.25
 -15   6   7    2.67    2.78
  15   6  -7    5.46    2.95
 -14  -6   7    1.87    2.00
  14  -6  -7    3.61    2.04
  14   6  -7    5.59    2.77
 -14   6   7    1.93    2.58
  13  -6  -7    0.19    1.87
 -13  -6   7   -3.25    1.82
 -13   6   7   -0.17    2.28
  13   6  -7   -2.30    2.33
  12  -6  -7   10.42    2.23
 -12  -6   7   10.32    2.26
  12   6  -7    7.41    2.44
 -12   6   7    6.62    2.53
 -11  -6   7    1.30    2.04
  11  -6  -7   -1.43    1.84
  11   6  -7    0.27    2.14
 -11   6   7    2.81    2.11
  10  -6  -7   18.17    2.41
 -10  -6   7   19.01    2.40
 -10   6   7   19.70    2.62
  10   6  -7   13.36    2.53
   9  -6  -7    6.37    1.75
  -9  -6   7    3.01    1.77
  -9   6   7    0.99    1.86
   9   6  -7    0.82    1.93
   8  -6  -7   47.58    3.19
  -8  -6   7   45.84    3.13
   8   6  -7   40.09    3.31
  -8   6   7   46.89    3.50
   7  -6  -7   13.33    2.55
   7  -6  -7   15.85    1.92
  -7  -6   7   13.31    1.88
  -7   6   7   14.11    2.07
   7   6  -7   12.67    2.07
  -6  -6   7    9.39    1.67
  -6  -6   7   10.25    2.12
   6  -6  -7   11.57    2.50
   6  -6  -7    9.94    1.68
   6   6  -7   11.88    1.97
  -6   6   7   14.48    1.95
  -5  -6   7    1.87    1.90
  -5  -6   7    2.11    1.27
   5  -6  -7   -0.24    1.30
   5  -6  -7    1.33    2.18
   5   6  -7   -1.74    1.42
  -5   6   7    0.21    1.43
   4  -6  -7   -0.37    2.22
  -4  -6   7    0.78    1.24
   4  -6  -7    1.41    1.26
  -4   6   7   -0.33    1.33
   4   6  -7   -0.27    1.42
  -3  -6   7   -1.84    1.15
   3  -6  -7    1.63    1.23
  -3   6   7   -1.05    1.28
   3   6  -7   -2.37    1.33
   2  -6  -7    2.06    1.21
  -2  -6   7    1.74    1.19
  -2   6   7    0.26    1.27
   2   6  -7    0.66    1.37
  -1  -6   7    2.82    1.23
   1  -6  -7    1.42    1.23
   1   6  -7    0.85    1.46
  -1   6   7    3.46    1.44
   0  -6  -7   31.91    2.37
   0  -6   7   32.82    2.36
   0   6   7   31.37    2.70
   0   6  -7   30.78    2.75
   1  -6   7    8.86    1.58
  -1  -6  -7   12.78    1.77
  -1   6  -7   13.28    1.98
   1   6   7   17.01    2.01
  -2  -6  -7    9.98    1.71
   2  -6   7    8.71    1.64
  -2   6  -7   11.46    1.98
  -3  -6  -7    1.45    1.61
   3  -6   7    0.26    1.40
   3   6   7    1.31    1.63
  -3   6  -7    1.39    1.78
   4  -6   7   13.15    1.99
  -4  -6  -7   16.83    2.29
   4   6   7   13.68    2.35
  -4   6  -7   18.72    2.53
   5  -6   7    1.43    1.71
  -5  -6  -7   -1.87    1.71
   5   6   7   -1.34    1.87
  -5   6  -7    4.07    2.11
  -6  -6  -7    5.93    2.13
   6  -6   7    7.66    2.03
  -6   6  -7    5.63    2.42
   6   6   7    6.97    2.31
  -7  -6  -7   12.14    2.26
   7  -6   7    7.44    2.06
   7   6   7    9.03    2.50
  -7   6  -7    6.20    2.35
   8  -6   7   24.47    2.84
   8   6   7   17.32    2.88
  -8   6  -7   13.46    2.85
   9  -6   7    6.39    2.31
  -9   6  -7    6.75    2.81
   9   6   7    6.72    2.71
  10  -6   7   10.46    2.52
  10   6   7    9.13    3.02
 -10   6  -7   10.46    3.09
 -11   6  -7   11.25    3.37
  11   6   7   10.97    3.32
 -12   6  -7    3.89    3.18
  12   6   7   -3.18    3.00
 -13   6  -7    0.43    3.29
  13   6   7    2.31    3.24
  19   7  -7    0.31    3.52
 -19   7   7    2.32    3.52
  18   7  -7    2.48    3.46
 -18   7   7    4.57    3.24
 -17   7   7    5.98    3.31
  17   7  -7    9.93    3.60
 -16   7   7   -4.00    2.70
  16   7  -7    3.15    2.99
 -15   7   7   24.90    3.64
  15   7  -7   20.30    3.78
 -14   7   7   23.95    3.46
  14   7  -7   20.58    3.51
  13  -7  -7    0.87    1.82
 -13   7   7    1.01    2.36
  13   7  -7   -1.18    2.34
 -12  -7   7   -0.25    1.68
  12  -7  -7    2.09    1.87
  12   7  -7    2.96    2.42
 -12   7   7    4.89    2.48
  11  -7  -7    3.10    1.78
 -11  -7   7    1.83    1.72
  11   7  -7    0.93    2.17
 -11   7   7   -0.92    2.14
 -10  -7   7    1.98    1.63
  10  -7  -7    2.32    1.72
 -10   7   7    2.61    2.10
  10   7  -7    0.51    2.04
   9  -7  -7    1.62    1.62
  -9  -7   7    1.45    1.60
   9   7  -7    4.75    2.01
  -9   7   7    2.41    1.88
  -8  -7   7   22.73    2.21
   8  -7  -7   22.06    2.21
  -8   7   7   22.78    2.57
   8   7  -7   25.31    2.61
   7  -7  -7    4.82    2.56
   7  -7  -7    3.91    1.53
  -7  -7   7    3.13    1.48
  -7   7   7    7.00    1.85
   7   7  -7    4.16    1.79
   6  -7  -7   -1.83    2.38
  -6  -7   7   -1.96    2.14
   6  -7  -7   -0.17    1.32
  -6  -7   7    0.42    1.23
   6   7  -7   -0.57    1.57
  -6   7   7    1.12    1.57
  -5  -7   7   15.22    2.49
  -5  -7   7   10.15    1.48
   5  -7  -7   11.51    2.70
   5  -7  -7   12.68    1.47
   5   7  -7   12.28    1.91
  -5   7   7    9.37    1.78
   4  -7  -7    2.21    0.71
   4  -7  -7    1.04    2.51
  -4  -7   7    0.50    1.09
  -4   7   7    0.86    1.47
   4   7  -7   -0.28    1.47
  -3  -7   7    7.66    1.25
   3  -7  -7   10.03    2.64
  -3   7   7   10.31    1.66
   3   7  -7    9.81    1.72
  -2  -7   7    4.94    1.19
   2   7  -7    5.65    1.61
  -2   7   7    7.27    1.54
  -1  -7   7   -0.35    1.04
   1  -7  -7    1.20    0.46
   1   7  -7    0.20    1.46
  -1   7   7   -1.56    1.37
   0  -7   7    5.68    1.26
   0  -7  -7    7.25    1.23
   0   7  -7    6.28    1.75
   0   7   7    9.08    1.66
   1  -7   7   12.21    1.60
  -1  -7  -7   12.50    1.64
   1   7   7   15.42    2.03
  -1   7  -7   13.76    2.01
  -2  -7  -7    5.09    1.55
   2  -7   7    7.77    1.49
  -2   7  -7    7.44    1.92
   3  -7   7   19.41    2.06
  -3  -7  -7   26.17    2.35
   3   7   7   21.78    2.50
  -3   7  -7   23.38    2.60
  -4  -7  -7   13.04    1.97
   4  -7   7    9.29    1.76
  -4   7  -7    9.66    2.22
   4   7   7    6.82    2.20
  -5  -7  -7   10.40    1.95
   5  -7   7    7.65    1.79
   5   7   7    7.15    2.28
  -5   7  -7    9.26    2.36
   6  -7   7    0.35    1.58
   6   7   7    3.43    2.23
  -6   7  -7    2.12    2.17
   7  -7   7    0.09    1.68
[truncated: 384,514 more chars]
