# Supplementary material for: Primary Amine Nucleophilic Addition to Nitrilium Closo-Dodecaborate [B12H11NCCH3]−: A Simple and Effective Route to the New BNCT Drug Design
Source: Int J Mol Sci. 2021 Dec 13;22(24):13391. doi: 10.3390/ijms222413391 (PMC8707455; doi:10.3390/ijms222413391)
Supplement: Supplementary file 1 [file ijms-22-13391-s001.zip › CCDC 2122679.cif]

 
data_Zh361
 
_audit_creation_method            'SHELXL-2018/3'
_shelx_SHELXL_version_number      '2018/3'
_chemical_name_systematic         ?
_chemical_name_common             ?
_chemical_melting_point           ?
_chemical_formula_moiety          ?
_chemical_formula_sum
 'C24 H57 B12 N3' 
_chemical_formula_weight          517.44

loop_
 _atom_type_symbol
 _atom_type_description
 _atom_type_scat_dispersion_real
 _atom_type_scat_dispersion_imag
 _atom_type_scat_source
 'C'  'C'   0.0033   0.0016
 'International Tables Vol C Tables 4.2.6.8 and 6.1.1.4'
 'H'  'H'   0.0000   0.0000
 'International Tables Vol C Tables 4.2.6.8 and 6.1.1.4'
 'B'  'B'   0.0013   0.0007
 'International Tables Vol C Tables 4.2.6.8 and 6.1.1.4'
 'N'  'N'   0.0061   0.0033
 'International Tables Vol C Tables 4.2.6.8 and 6.1.1.4'
 
_space_group_crystal_system       triclinic
_space_group_IT_number            2
_space_group_name_H-M_alt         'P -1'
_space_group_name_Hall            '-P 1'
 
_shelx_space_group_comment
;
The symmetry employed for this shelxl refinement is uniquely defined
by the following loop, which should always be used as a source of
symmetry information in preference to the above space-group names.
They are only intended as comments.
;
 
loop_
 _space_group_symop_operation_xyz
 'x, y, z'
 '-x, -y, -z'
 
_cell_length_a                    11.4609(12)
_cell_length_b                    18.020(2)
_cell_length_c                    19.186(3)
_cell_angle_alpha                 112.896(7)
_cell_angle_beta                  100.698(8)
_cell_angle_gamma                 101.699(5)
_cell_volume                      3417.2(8)
_cell_formula_units_Z             4
_cell_measurement_temperature     296(2)
_cell_measurement_reflns_used     1723
_cell_measurement_theta_min       3.09
_cell_measurement_theta_max       17.86
 
_exptl_crystal_description        'plate'
_exptl_crystal_colour             'colourless'
_exptl_crystal_density_meas       ?
_exptl_crystal_density_method     ?
_exptl_crystal_density_diffrn     1.006          
_exptl_crystal_F_000              1128
_exptl_transmission_factor_min    ?
_exptl_transmission_factor_max    ?
_exptl_crystal_size_max           0.400
_exptl_crystal_size_mid           0.300
_exptl_crystal_size_min           0.030
_exptl_absorpt_coefficient_mu     0.053
_shelx_estimated_absorpt_T_min    0.979
_shelx_estimated_absorpt_T_max    0.998
_exptl_absorpt_correction_type    none
_exptl_absorpt_correction_T_min   ?
_exptl_absorpt_correction_T_max   ?
_exptl_absorpt_process_details    ?
_exptl_absorpt_special_details    ?
_diffrn_ambient_temperature       296(2)
_diffrn_radiation_wavelength      0.71073
_diffrn_radiation_type            MoK\a
_diffrn_source                    ?
_diffrn_measurement_device_type    
 'Bruker KAPPA APEX II area-detector diffractometer' 
_diffrn_measurement_method        ?
_diffrn_detector_area_resol_mean  ?
_diffrn_reflns_number             30679
_diffrn_reflns_av_unetI/netI      0.2482
_diffrn_reflns_av_R_equivalents   0.1037
_diffrn_reflns_limit_h_min        -14
_diffrn_reflns_limit_h_max        14
_diffrn_reflns_limit_k_min        -22
_diffrn_reflns_limit_k_max        23
_diffrn_reflns_limit_l_min        -24
_diffrn_reflns_limit_l_max        24
_diffrn_reflns_theta_min          4.080
_diffrn_reflns_theta_max          27.498
_diffrn_reflns_theta_full         25.242
_diffrn_measured_fraction_theta_max   0.990
_diffrn_measured_fraction_theta_full  0.993
_diffrn_reflns_Laue_measured_fraction_max    0.990
_diffrn_reflns_Laue_measured_fraction_full   0.993
_diffrn_reflns_point_group_measured_fraction_max   0.990
_diffrn_reflns_point_group_measured_fraction_full  0.993
_reflns_number_total              15532
_reflns_number_gt                 4265
_reflns_threshold_expression      'I > 2\s(I)'
_reflns_Friedel_coverage          0.000
_reflns_Friedel_fraction_max      .
_reflns_Friedel_fraction_full     .
 
_reflns_special_details
;
 Reflections were merged by SHELXL according to the crystal
 class for the calculation of statistics and refinement.
 
 _reflns_Friedel_fraction is defined as the number of unique
 Friedel pairs measured divided by the number that would be
 possible theoretically, ignoring centric projections and
 systematic absences.
;
 
_computing_data_collection        ?
_computing_cell_refinement        ?
_computing_data_reduction         ?
_computing_structure_solution     ?
_computing_structure_refinement 'SHELXL-2018/3 (Sheldrick, 2018)'
_computing_molecular_graphics     ?
_computing_publication_material   ?
_refine_special_details           ?
_refine_ls_structure_factor_coef  Fsqd
_refine_ls_matrix_type            full
_refine_ls_weighting_scheme       calc
_refine_ls_weighting_details
'w=1/[\s^2^(Fo^2^)+(0.1085P)^2^] where P=(Fo^2^+2Fc^2^)/3'
_atom_sites_solution_primary      ?
_atom_sites_solution_secondary    ?
_atom_sites_solution_hydrogens    mixed
_refine_ls_hydrogen_treatment     mixed
_refine_ls_extinction_method      none
_refine_ls_extinction_coef        .
_refine_ls_number_reflns          15532
_refine_ls_number_parameters      769
_refine_ls_number_restraints      55
_refine_ls_R_factor_all           0.2983
_refine_ls_R_factor_gt            0.0891
_refine_ls_wR_factor_ref          0.2784
_refine_ls_wR_factor_gt           0.1929
_refine_ls_goodness_of_fit_ref    0.903
_refine_ls_restrained_S_all       0.909
_refine_ls_shift/su_max           0.003
_refine_ls_shift/su_mean          0.000
 
loop_
 _atom_site_label
 _atom_site_type_symbol
 _atom_site_fract_x
 _atom_site_fract_y
 _atom_site_fract_z
 _atom_site_U_iso_or_equiv
 _atom_site_adp_type
 _atom_site_occupancy
 _atom_site_site_symmetry_order  
 _atom_site_calc_flag
 _atom_site_refinement_flags_posn
 _atom_site_refinement_flags_adp
 _atom_site_refinement_flags_occupancy
 _atom_site_disorder_assembly
 _atom_site_disorder_group
N1 N 0.6401(3) 0.77607(19) 0.6213(2) 0.0566(9) Uani 1 1 d . . . . .
H1B H 0.639550 0.740459 0.640871 0.068 Uiso 1 1 calc R U . . .
N2 N 0.5427(3) 0.8014(2) 0.5221(2) 0.0657(10) Uani 1 1 d . . . . .
H2B H 0.599663 0.849582 0.546066 0.079 Uiso 1 1 calc R U . . .
C1 C 0.5524(4) 0.7496(2) 0.5561(3) 0.0535(10) Uani 1 1 d . . . . .
C2 C 0.4633(4) 0.6632(2) 0.5199(2) 0.0726(13) Uani 1 1 d . . . . .
H2D H 0.461330 0.643361 0.559511 0.109 Uiso 1 1 calc R U . . .
H2E H 0.489216 0.625942 0.478576 0.109 Uiso 1 1 calc R U . . .
H2F H 0.381596 0.664403 0.498053 0.109 Uiso 1 1 calc R U . . .
C3 C 0.4556(4) 0.7905(3) 0.4540(3) 0.0572(11) Uani 1 1 d . . . . .
C4 C 0.4175(4) 0.8588(3) 0.4571(3) 0.0757(13) Uani 1 1 d . . . . .
H4B H 0.445520 0.908708 0.503850 0.091 Uiso 1 1 calc R U . . .
C5 C 0.3377(5) 0.8533(4) 0.3909(4) 0.0933(16) Uani 1 1 d . . . . .
H5B H 0.312569 0.899961 0.393192 0.112 Uiso 1 1 calc R U . . .
C6 C 0.2952(5) 0.7810(5) 0.3226(4) 0.1021(18) Uani 1 1 d . . . . .
H6B H 0.240747 0.777654 0.278215 0.123 Uiso 1 1 calc R U . . .
C7 C 0.3335(5) 0.7128(4) 0.3195(3) 0.0961(17) Uani 1 1 d . . . . .
H7B H 0.304827 0.662920 0.272654 0.115 Uiso 1 1 calc R U . . .
C8 C 0.4145(4) 0.7175(3) 0.3853(3) 0.0733(13) Uani 1 1 d . . . . .
H8B H 0.440714 0.671162 0.382763 0.088 Uiso 1 1 calc R U . . .
B1 B 0.7445(4) 0.8598(3) 0.6693(3) 0.0487(12) Uani 1 1 d . . . . .
B2 B 0.7337(4) 0.9596(3) 0.6808(3) 0.0645(15) Uani 1 1 d . . . . .
H2 H 0.650(3) 0.969(2) 0.654(2) 0.077 Uiso 1 1 d . U . . .
B3 B 0.7396(5) 0.9342(3) 0.7615(3) 0.0639(14) Uani 1 1 d . . . . .
H3 H 0.661(3) 0.918(2) 0.781(2) 0.077 Uiso 1 1 d . U . . .
B4 B 0.8435(4) 0.8730(3) 0.7582(3) 0.0510(12) Uani 1 1 d . . . . .
H4 H 0.830(3) 0.824(2) 0.7792(19) 0.061 Uiso 1 1 d . U . . .
B5 B 0.9013(4) 0.8603(3) 0.6766(3) 0.0502(12) Uani 1 1 d . . . . .
H5 H 0.916(3) 0.799(2) 0.644(2) 0.060 Uiso 1 1 d . U . . .
B6 B 0.8338(4) 0.9145(3) 0.6279(3) 0.0580(13) Uani 1 1 d . . . . .
H6 H 0.805(3) 0.890(2) 0.563(2) 0.070 Uiso 1 1 d . U . . .
B7 B 0.8845(4) 1.0231(3) 0.6951(3) 0.0657(15) Uani 1 1 d . . . . .
H7 H 0.893(3) 1.072(2) 0.671(2) 0.079 Uiso 1 1 d . U . . .
B8 B 0.8264(4) 1.0350(3) 0.7770(3) 0.0680(15) Uani 1 1 d . . . . .
H8 H 0.808(3) 1.089(3) 0.812(2) 0.082 Uiso 1 1 d . U . . .
B9 B 0.8952(5) 0.9815(3) 0.8252(3) 0.0628(14) Uani 1 1 d . . . . .
H9 H 0.910(3) 1.005(2) 0.891(2) 0.075 Uiso 1 1 d . U . . .
B10 B 0.9933(4) 0.9355(3) 0.7727(3) 0.0539(13) Uani 1 1 d . . . . .
H10 H 1.078(3) 0.930(2) 0.804(2) 0.065 Uiso 1 1 d . U . . .
B11 B 0.9880(4) 0.9622(3) 0.6930(3) 0.0592(13) Uani 1 1 d . . . . .
H11 H 1.074(3) 0.969(2) 0.669(2) 0.071 Uiso 1 1 d . U . . .
B12 B 0.9821(4) 1.0363(3) 0.7842(3) 0.0587(14) Uani 1 1 d . . . . .
H12 H 1.062(3) 1.093(2) 0.823(2) 0.070 Uiso 1 1 d . U . . .
N1A N 0.6648(3) 0.77808(19) 0.8647(2) 0.0606(10) Uani 1 1 d . . . . .
H1C H 0.711314 0.798599 0.842098 0.073 Uiso 1 1 calc R U . . .
N2A N 0.5948(3) 0.8094(2) 0.97198(19) 0.0629(10) Uani 1 1 d . . . . .
H2C H 0.561073 0.755828 0.953594 0.076 Uiso 1 1 calc R U . . .
C1A C 0.6611(4) 0.8334(3) 0.9312(3) 0.0667(12) Uani 1 1 d . . . . .
C2A C 0.7305(5) 0.9242(3) 0.9626(3) 0.119(2) Uani 1 1 d . . . . .
H2AB H 0.752504 0.935013 0.920804 0.178 Uiso 1 1 calc R U . . .
H2AC H 0.804797 0.938532 1.003927 0.178 Uiso 1 1 calc R U . . .
H2AD H 0.678986 0.957977 0.983481 0.178 Uiso 1 1 calc R U . . .
C3A C 0.5715(4) 0.8610(3) 1.0429(2) 0.0553(11) Uani 1 1 d . . . . .
C4A C 0.4529(4) 0.8574(4) 1.0440(3) 0.0907(16) Uani 1 1 d . . . . .
H4AA H 0.387397 0.822112 0.998309 0.109 Uiso 1 1 calc R U . . .
C5A C 0.4283(5) 0.9058(4) 1.1128(4) 0.109(2) Uani 1 1 d . . . . .
H5AA H 0.346541 0.902388 1.113513 0.131 Uiso 1 1 calc R U . . .
C6A C 0.5240(6) 0.9581(4) 1.1789(3) 0.0991(17) Uani 1 1 d . . . . .
H6AA H 0.508377 0.991640 1.224974 0.119 Uiso 1 1 calc R U . . .
C7A C 0.6416(5) 0.9613(3) 1.1775(3) 0.0825(14) Uani 1 1 d . . . . .
H7AA H 0.706942 0.996957 1.223236 0.099 Uiso 1 1 calc R U . . .
C8A C 0.6679(4) 0.9131(3) 1.1100(3) 0.0635(12) Uani 1 1 d . . . . .
H8AA H 0.749853 0.915910 1.110001 0.076 Uiso 1 1 calc R U . . .
B1A B 0.6013(4) 0.6825(3) 0.8191(3) 0.0444(11) Uani 1 1 d . . . . .
B2A B 0.4863(4) 0.6422(3) 0.7277(3) 0.0521(12) Uani 1 1 d . . . . .
H2A H 0.463(3) 0.683(2) 0.707(2) 0.062 Uiso 1 1 d . U . . .
B3A B 0.6353(4) 0.6288(3) 0.7304(3) 0.0499(12) Uani 1 1 d . . . . .
H3A H 0.703(3) 0.661(2) 0.7083(18) 0.060 Uiso 1 1 d . U . . .
B4A B 0.6864(4) 0.6107(3) 0.8134(3) 0.0505(12) Uani 1 1 d . . . . .
H4A H 0.790(3) 0.633(2) 0.8465(19) 0.061 Uiso 1 1 d . U . . .
B5A B 0.5688(4) 0.6134(3) 0.8621(3) 0.0491(12) Uani 1 1 d . . . . .
H5A H 0.587(3) 0.637(2) 0.928(2) 0.059 Uiso 1 1 d . U . . .
B6A B 0.4458(4) 0.6333(3) 0.8093(3) 0.0477(12) Uani 1 1 d . . . . .
H6A H 0.388(3) 0.674(2) 0.8453(18) 0.057 Uiso 1 1 d . U . . .
B7A B 0.3833(4) 0.5478(3) 0.7131(3) 0.0588(13) Uani 1 1 d . . . . .
H7A H 0.282(3) 0.529(2) 0.680(2) 0.071 Uiso 1 1 d . U . . .
B8A B 0.5008(4) 0.5453(3) 0.6643(3) 0.0526(12) Uani 1 1 d . . . . .
H8A H 0.482(3) 0.519(2) 0.597(2) 0.063 Uiso 1 1 d . U . . .
B9A B 0.6249(4) 0.5259(3) 0.7184(3) 0.0500(12) Uani 1 1 d . . . . .
H9A H 0.681(3) 0.492(2) 0.6881(19) 0.060 Uiso 1 1 d . U . . .
B10A B 0.5835(4) 0.5152(3) 0.7990(3) 0.0572(13) Uani 1 1 d . . . . .
H10A H 0.617(3) 0.473(2) 0.822(2) 0.069 Uiso 1 1 d . U . . .
B11A B 0.4341(4) 0.5292(3) 0.7962(3) 0.0543(13) Uani 1 1 d . . . . .
H11A H 0.369(3) 0.496(2) 0.8192(19) 0.065 Uiso 1 1 d . U . . .
B12A B 0.4674(4) 0.4749(3) 0.7066(3) 0.0560(13) Uani 1 1 d . . . . .
H12A H 0.416(3) 0.403(2) 0.669(2) 0.067 Uiso 1 1 d . U . . .
N3 N 0.7303(3) 0.7532(2) 0.2487(2) 0.0761(11) Uani 1 1 d . . . . .
N4 N 0.9359(3) 0.3354(2) 0.2585(2) 0.0560(9) Uani 1 1 d . . . . .
C11 C 0.7826(5) 0.7147(3) 0.3002(3) 0.0941(16) Uani 1 1 d . . . . .
H11B H 0.772389 0.655976 0.266601 0.113 Uiso 1 1 calc R U . . .
H11C H 0.733617 0.715682 0.336535 0.113 Uiso 1 1 calc R U . . .
C12 C 0.9187(6) 0.7580(5) 0.3479(4) 0.152(3) Uani 1 1 d . . . . .
H12B H 0.935556 0.818889 0.372205 0.183 Uiso 1 1 calc R U . . .
H12C H 0.971457 0.743783 0.313680 0.183 Uiso 1 1 calc R U . . .
C13 C 0.9470(9) 0.7264(9) 0.4146(9) 0.253(6) Uani 1 1 d D . . . .
H13A H 0.983514 0.774533 0.466248 0.304 Uiso 1 1 calc R U . . .
H13B H 0.870223 0.691913 0.414697 0.304 Uiso 1 1 calc R U . . .
C14 C 1.0312(18) 0.6781(10) 0.3981(9) 0.372(10) Uani 1 1 d D . . . .
H14A H 1.048993 0.658699 0.437764 0.559 Uiso 1 1 calc R U . . .
H14B H 0.994225 0.630391 0.347040 0.559 Uiso 1 1 calc R U . . .
H14C H 1.107136 0.712734 0.398419 0.559 Uiso 1 1 calc R U . . .
C21 C 0.5955(4) 0.6990(3) 0.2061(3) 0.0896(16) Uani 1 1 d . . . . .
H21A H 0.594160 0.641093 0.176324 0.108 Uiso 1 1 calc R U . . .
H21B H 0.552805 0.699779 0.245434 0.108 Uiso 1 1 calc R U . . .
C22 C 0.5231(5) 0.7253(4) 0.1500(4) 0.139(3) Uani 1 1 d . . . . .
H22A H 0.568416 0.730027 0.113180 0.167 Uiso 1 1 calc R U . A 1
H22B H 0.513989 0.780273 0.179809 0.167 Uiso 1 1 calc R U . A 1
C23A C 0.3952(6) 0.6609(5) 0.1045(5) 0.152(3) Uani 0.5 1 d D . P B 1
H23A H 0.406956 0.605439 0.088583 0.182 Uiso 0.5 1 calc R U P B 1
H23B H 0.347138 0.666659 0.141882 0.182 Uiso 0.5 1 calc R U P B 1
C24A C 0.3178(17) 0.6596(14) 0.0353(9) 0.247(9) Uiso 0.5 1 d D . P B 1
H24A H 0.241108 0.614544 0.015052 0.371 Uiso 0.5 1 calc R U P B 1
H24B H 0.300293 0.712573 0.049324 0.371 Uiso 0.5 1 calc R U P B 1
H24C H 0.360550 0.650904 -0.004367 0.371 Uiso 0.5 1 calc R U P B 1
C23B C 0.3952(6) 0.6609(5) 0.1045(5) 0.152(3) Uani 0.5 1 d D . P B 2
H23C H 0.359827 0.643265 0.139806 0.182 Uiso 0.5 1 calc R U P B 2
H23D H 0.340113 0.685892 0.082765 0.182 Uiso 0.5 1 calc R U P B 2
C24B C 0.4068(14) 0.5885(8) 0.0413(8) 0.164(6) Uiso 0.5 1 d D . P B 2
H24D H 0.326104 0.547620 0.012388 0.246 Uiso 0.5 1 calc R U P B 2
H24E H 0.441187 0.606223 0.006273 0.246 Uiso 0.5 1 calc R U P B 2
H24F H 0.460845 0.563716 0.063153 0.246 Uiso 0.5 1 calc R U P B 2
C31 C 0.7431(5) 0.8455(3) 0.2986(3) 0.0841(15) Uani 1 1 d . . . . .
H31A H 0.831085 0.876566 0.322783 0.101 Uiso 1 1 calc R U . . .
H31B H 0.709129 0.868015 0.263814 0.101 Uiso 1 1 calc R U . . .
C32 C 0.6798(6) 0.8614(4) 0.3629(4) 0.124(2) Uani 1 1 d . . . . .
H32A H 0.714095 0.840241 0.398898 0.149 Uiso 1 1 calc R U . . .
H32B H 0.591479 0.831193 0.339594 0.149 Uiso 1 1 calc R U . . .
C33 C 0.6981(6) 0.9560(4) 0.4090(4) 0.148(3) Uani 1 1 d D . . . .
H33A H 0.678640 0.978689 0.371478 0.178 Uiso 1 1 calc R U . . .
H33B H 0.639263 0.962984 0.439651 0.178 Uiso 1 1 calc R U . . .
C34 C 0.8220(7) 1.0050(4) 0.4618(3) 0.158(3) Uani 1 1 d D . . . .
H34A H 0.825851 1.063251 0.488310 0.237 Uiso 1 1 calc R U . . .
H34B H 0.841636 0.984204 0.500263 0.237 Uiso 1 1 calc R U . . .
H34C H 0.881075 0.999934 0.431984 0.237 Uiso 1 1 calc R U . . .
C41 C 0.8021(5) 0.7535(3) 0.1900(3) 0.0863(15) Uani 1 1 d . . . . .
H41A H 0.888522 0.785772 0.219277 0.104 Uiso 1 1 calc R U . . .
H41B H 0.769763 0.782779 0.161598 0.104 Uiso 1 1 calc R U . . .
C42 C 0.7981(6) 0.6670(4) 0.1296(4) 0.121(2) Uani 1 1 d . . . . .
H42A H 0.712270 0.633306 0.100056 0.146 Uiso 1 1 calc R U . C 1
H42B H 0.834408 0.637801 0.156689 0.146 Uiso 1 1 calc R U . C 1
C43A C 0.8703(6) 0.6766(4) 0.0726(4) 0.134(2) Uani 0.5 1 d D . P D 1
H43A H 0.840793 0.713035 0.052132 0.161 Uiso 0.5 1 calc R U P D 1
H43B H 0.957475 0.705289 0.102521 0.161 Uiso 0.5 1 calc R U P D 1
C44A C 0.8622(13) 0.5996(7) 0.0064(7) 0.167(6) Uiso 0.5 1 d D . P D 1
H44A H 0.910639 0.612845 -0.025329 0.250 Uiso 0.5 1 calc R U P D 1
H44B H 0.893780 0.563498 0.025566 0.250 Uiso 0.5 1 calc R U P D 1
H44C H 0.776754 0.571267 -0.024972 0.250 Uiso 0.5 1 calc R U P D 1
C43B C 0.8703(6) 0.6766(4) 0.0726(4) 0.134(2) Uani 0.5 1 d D . P D 2
H43C H 0.849863 0.622462 0.026960 0.161 Uiso 0.5 1 calc R U P D 2
H43D H 0.846454 0.716053 0.054290 0.161 Uiso 0.5 1 calc R U P D 2
C44B C 1.0029(8) 0.7072(9) 0.1115(7) 0.143(5) Uiso 0.5 1 d D . P D 2
H44D H 1.047075 0.712935 0.075136 0.214 Uiso 0.5 1 calc R U P D 2
H44E H 1.023144 0.761112 0.156312 0.214 Uiso 0.5 1 calc R U P D 2
H44F H 1.026546 0.667700 0.129034 0.214 Uiso 0.5 1 calc R U P D 2
C51 C 0.9078(4) 0.3990(3) 0.2298(3) 0.0775(14) Uani 1 1 d . . . . .
H51A H 0.830320 0.371301 0.187101 0.093 Uiso 1 1 calc R U . . .
H51B H 0.894301 0.444136 0.272712 0.093 Uiso 1 1 calc R U . . .
C52 C 1.0046(4) 0.4375(3) 0.2013(3) 0.0851(15) Uani 1 1 d . . . . .
H52A H 1.081016 0.468666 0.244696 0.102 Uiso 1 1 calc R U . E 1
H52B H 1.021730 0.392708 0.160064 0.102 Uiso 1 1 calc R U . E 1
C53A C 0.9677(6) 0.4949(4) 0.1701(5) 0.134(3) Uani 0.712(14) 1 d D . P F 1
H53A H 0.888363 0.464460 0.129235 0.161 Uiso 0.712(14) 1 calc R U P F 1
H53B H 0.955248 0.541265 0.212465 0.161 Uiso 0.712(14) 1 calc R U P F 1
C54A C 1.0563(8) 0.5299(7) 0.1374(6) 0.169(6) Uiso 0.712(14) 1 d D . P F 1
H54A H 1.025128 0.566346 0.118556 0.253 Uiso 0.712(14) 1 calc R U P F 1
H54B H 1.134634 0.561702 0.177703 0.253 Uiso 0.712(14) 1 calc R U P F 1
H54C H 1.067627 0.484757 0.094320 0.253 Uiso 0.712(14) 1 calc R U P F 1
C53B C 0.9677(6) 0.4949(4) 0.1701(5) 0.134(3) Uani 0.288(14) 1 d D . P F 2
H53C H 0.941847 0.536617 0.208810 0.161 Uiso 0.288(14) 1 calc R U P F 2
H53D H 1.037893 0.524482 0.159633 0.161 Uiso 0.288(14) 1 calc R U P F 2
C54B C 0.866(2) 0.4461(18) 0.0978(11) 0.215(17) Uiso 0.288(14) 1 d D . P F 2
H54D H 0.841437 0.483111 0.077208 0.322 Uiso 0.288(14) 1 calc R U P F 2
H54E H 0.892303 0.405273 0.059655 0.322 Uiso 0.288(14) 1 calc R U P F 2
H54F H 0.796545 0.417372 0.108685 0.322 Uiso 0.288(14) 1 calc R U P F 2
C61 C 1.0549(3) 0.3745(3) 0.3270(2) 0.0644(12) Uani 1 1 d . . . . .
H61A H 1.068718 0.330999 0.342523 0.077 Uiso 1 1 calc R U . . .
H61B H 1.123624 0.390812 0.307837 0.077 Uiso 1 1 calc R U . . .
C62 C 1.0606(6) 0.4507(3) 0.4006(3) 0.114(2) Uani 1 1 d . . . . .
H62A H 0.991836 0.436640 0.420657 0.136 Uiso 1 1 calc R U . . .
H62B H 1.053993 0.497041 0.387835 0.136 Uiso 1 1 calc R U . . .
C63 C 1.1885(6) 0.4775(4) 0.4651(4) 0.146(3) Uani 1 1 d D . . . .
H63A H 1.256579 0.485164 0.442597 0.175 Uiso 1 1 calc R U . . .
H63B H 1.198997 0.530893 0.509319 0.175 Uiso 1 1 calc R U . . .
C64 C 1.1920(8) 0.4135(6) 0.4927(4) 0.210(5) Uani 1 1 d D . . . .
H64A H 1.270329 0.430655 0.531843 0.314 Uiso 1 1 calc R U . . .
H64B H 1.125305 0.406483 0.515550 0.314 Uiso 1 1 calc R U . . .
H64C H 1.182781 0.360838 0.448951 0.314 Uiso 1 1 calc R U . . .
C71 C 0.9586(3) 0.2637(2) 0.1947(2) 0.0585(11) Uani 1 1 d . . . . .
H71A H 0.982058 0.226832 0.216792 0.070 Uiso 1 1 calc R U . . .
H71B H 1.029465 0.286983 0.180577 0.070 Uiso 1 1 calc R U . . .
C72 C 0.8520(4) 0.2099(3) 0.1195(3) 0.0974(18) Uani 1 1 d . . . . .
H72A H 0.818550 0.246416 0.100812 0.117 Uiso 1 1 calc R U . . .
H72B H 0.786033 0.177263 0.130592 0.117 Uiso 1 1 calc R U . . .
C73 C 0.8942(5) 0.1503(3) 0.0552(3) 0.108(2) Uani 1 1 d D . . . .
H73A H 0.938194 0.119762 0.076789 0.130 Uiso 1 1 calc R U . . .
H73B H 0.821296 0.109239 0.012493 0.130 Uiso 1 1 calc R U . . .
C74 C 0.9747(7) 0.1929(4) 0.0233(3) 0.169(3) Uani 1 1 d D . . . .
H74A H 0.998017 0.151925 -0.016829 0.254 Uiso 1 1 calc R U . . .
H74B H 0.931241 0.222154 0.000558 0.254 Uiso 1 1 calc R U . . .
H74C H 1.048225 0.232686 0.064901 0.254 Uiso 1 1 calc R U . . .
C81 C 0.8251(3) 0.3048(3) 0.2829(3) 0.0738(13) Uani 1 1 d . . . . .
H81A H 0.810781 0.353863 0.320911 0.089 Uiso 1 1 calc R U . . .
H81B H 0.752531 0.277782 0.236701 0.089 Uiso 1 1 calc R U . . .
C82 C 0.8332(4) 0.2443(3) 0.3185(3) 0.0763(14) Uani 1 1 d . . . . .
H82A H 0.899262 0.272670 0.368241 0.092 Uiso 1 1 calc R U . . .
H82B H 0.854558 0.197045 0.283182 0.092 Uiso 1 1 calc R U . . .
C83 C 0.7126(5) 0.2112(4) 0.3330(4) 0.114(2) Uani 1 1 d D . . . .
H83A H 0.685425 0.258917 0.361308 0.137 Uiso 1 1 calc R U . . .
H83B H 0.649919 0.176582 0.282166 0.137 Uiso 1 1 calc R U . . .
C84 C 0.7176(5) 0.1617(3) 0.3771(3) 0.116(2) Uani 1 1 d D . . . .
H84A H 0.636943 0.143618 0.383193 0.175 Uiso 1 1 calc R U . . .
H84B H 0.741780 0.113039 0.348997 0.175 Uiso 1 1 calc R U . . .
H84C H 0.777375 0.195582 0.428339 0.175 Uiso 1 1 calc R U . . .
 
loop_
 _atom_site_aniso_label
 _atom_site_aniso_U_11
 _atom_site_aniso_U_22
 _atom_site_aniso_U_33
 _atom_site_aniso_U_23
 _atom_site_aniso_U_13
 _atom_site_aniso_U_12
N1 0.0516(19) 0.050(2) 0.069(2) 0.0335(19) 0.0093(19) 0.0113(16)
N2 0.063(2) 0.050(2) 0.078(3) 0.034(2) 0.005(2) 0.0078(17)
C1 0.052(2) 0.043(3) 0.066(3) 0.025(2) 0.019(2) 0.011(2)
C2 0.072(3) 0.053(3) 0.075(3) 0.028(3) 0.006(2) -0.004(2)
C3 0.056(3) 0.056(3) 0.061(3) 0.027(3) 0.015(2) 0.023(2)
C4 0.082(3) 0.075(3) 0.076(4) 0.037(3) 0.018(3) 0.035(3)
C5 0.099(4) 0.105(5) 0.104(5) 0.062(4) 0.028(4) 0.057(4)
C6 0.097(4) 0.123(5) 0.079(5) 0.047(4) 0.002(3) 0.037(4)
C7 0.095(4) 0.101(5) 0.071(4) 0.028(3) 0.008(3) 0.022(3)
C8 0.076(3) 0.071(3) 0.070(3) 0.029(3) 0.016(3) 0.025(3)
B1 0.042(2) 0.040(3) 0.065(3) 0.027(2) 0.013(2) 0.010(2)
B2 0.050(3) 0.048(3) 0.098(4) 0.039(3) 0.011(3) 0.016(2)
B3 0.055(3) 0.056(3) 0.084(4) 0.031(3) 0.032(3) 0.015(3)
B4 0.052(3) 0.046(3) 0.061(3) 0.032(3) 0.021(2) 0.008(2)
B5 0.047(3) 0.049(3) 0.064(3) 0.030(3) 0.021(2) 0.019(2)
B6 0.061(3) 0.060(3) 0.060(3) 0.038(3) 0.014(3) 0.010(3)
B7 0.064(3) 0.055(3) 0.088(4) 0.050(3) 0.014(3) 0.010(3)
B8 0.061(3) 0.043(3) 0.090(4) 0.019(3) 0.026(3) 0.016(3)
B9 0.068(3) 0.051(3) 0.061(3) 0.022(3) 0.023(3) 0.004(3)
B10 0.045(3) 0.052(3) 0.072(4) 0.037(3) 0.019(2) 0.010(2)
B11 0.054(3) 0.064(3) 0.073(4) 0.041(3) 0.028(3) 0.013(2)
B12 0.050(3) 0.045(3) 0.075(4) 0.031(3) 0.013(3) 0.000(2)
N1A 0.070(2) 0.041(2) 0.064(2) 0.0157(19) 0.0406(19) 0.0017(17)
N2A 0.077(2) 0.046(2) 0.059(2) 0.0157(19) 0.036(2) 0.0061(17)
C1A 0.084(3) 0.045(3) 0.067(3) 0.018(3) 0.042(3) 0.008(2)
C2A 0.177(5) 0.041(3) 0.118(4) 0.013(3) 0.092(4) -0.007(3)
C3A 0.055(3) 0.055(3) 0.045(3) 0.014(2) 0.014(2) 0.013(2)
C4A 0.050(3) 0.137(5) 0.063(3) 0.027(3) 0.014(3) 0.022(3)
C5A 0.076(4) 0.168(6) 0.086(4) 0.042(4) 0.038(4) 0.059(4)
C6A 0.103(4) 0.121(5) 0.069(4) 0.025(4) 0.035(4) 0.053(4)
C7A 0.099(4) 0.075(3) 0.055(3) 0.018(3) 0.010(3) 0.021(3)
C8A 0.059(3) 0.062(3) 0.058(3) 0.019(3) 0.015(3) 0.014(2)
B1A 0.042(2) 0.036(3) 0.057(3) 0.018(2) 0.026(2) 0.011(2)
B2A 0.054(3) 0.058(3) 0.056(3) 0.031(3) 0.017(2) 0.031(2)
B3A 0.056(3) 0.040(3) 0.064(3) 0.027(3) 0.033(3) 0.015(2)
B4A 0.038(2) 0.044(3) 0.063(3) 0.020(3) 0.012(2) 0.011(2)
B5A 0.048(3) 0.044(3) 0.058(3) 0.024(3) 0.023(2) 0.013(2)
B6A 0.040(2) 0.045(3) 0.057(3) 0.017(2) 0.018(2) 0.015(2)
B7A 0.041(3) 0.060(3) 0.065(3) 0.019(3) 0.013(2) 0.016(2)
B8A 0.058(3) 0.050(3) 0.053(3) 0.020(3) 0.023(3) 0.021(2)
B9A 0.040(2) 0.039(3) 0.071(3) 0.020(3) 0.025(2) 0.015(2)
B10A 0.060(3) 0.052(3) 0.076(4) 0.038(3) 0.027(3) 0.024(2)
B11A 0.048(3) 0.043(3) 0.075(4) 0.023(3) 0.035(3) 0.012(2)
B12A 0.046(3) 0.038(3) 0.074(4) 0.015(3) 0.024(3) 0.007(2)
N3 0.089(3) 0.055(2) 0.098(3) 0.047(2) 0.038(2) 0.011(2)
N4 0.0409(18) 0.061(2) 0.080(3) 0.037(2) 0.0235(18) 0.0253(16)
C11 0.110(4) 0.072(3) 0.116(4) 0.060(3) 0.034(4) 0.020(3)
C12 0.124(5) 0.168(7) 0.187(7) 0.130(6) 0.011(5) 0.016(5)
C13 0.183(9) 0.282(14) 0.349(17) 0.227(14) 0.006(10) 0.068(9)
C14 0.60(3) 0.40(2) 0.37(2) 0.286(19) 0.31(2) 0.27(2)
C21 0.090(4) 0.067(3) 0.112(4) 0.049(3) 0.034(3) 0.002(3)
C22 0.102(4) 0.134(6) 0.187(7) 0.111(5) 0.001(4) 0.002(4)
C23A 0.129(5) 0.152(7) 0.163(7) 0.105(6) -0.007(5) -0.006(5)
C23B 0.129(5) 0.152(7) 0.163(7) 0.105(6) -0.007(5) -0.006(5)
C31 0.103(4) 0.049(3) 0.099(4) 0.037(3) 0.032(3) 0.009(3)
C32 0.142(5) 0.087(5) 0.150(6) 0.051(4) 0.084(5) 0.017(4)
C33 0.171(7) 0.062(4) 0.166(7) 0.008(4) 0.072(6) 0.007(4)
C34 0.270(9) 0.103(5) 0.092(5) 0.047(4) 0.071(6) 0.016(6)
C41 0.106(4) 0.061(3) 0.105(4) 0.047(3) 0.049(3) 0.015(3)
C42 0.145(5) 0.095(5) 0.144(6) 0.059(4) 0.077(5) 0.031(4)
C43A 0.158(6) 0.124(5) 0.128(6) 0.048(5) 0.075(5) 0.044(4)
C43B 0.158(6) 0.124(5) 0.128(6) 0.048(5) 0.075(5) 0.044(4)
C51 0.059(3) 0.087(3) 0.126(4) 0.073(3) 0.042(3) 0.037(2)
C52 0.066(3) 0.096(4) 0.132(5) 0.077(4) 0.039(3) 0.036(3)
C53A 0.108(4) 0.160(6) 0.225(8) 0.150(6) 0.085(5) 0.061(4)
C53B 0.108(4) 0.160(6) 0.225(8) 0.150(6) 0.085(5) 0.061(4)
C61 0.052(2) 0.065(3) 0.069(3) 0.023(3) 0.014(2) 0.019(2)
C62 0.149(5) 0.082(4) 0.103(5) 0.014(4) 0.066(4) 0.050(4)
C63 0.135(6) 0.125(6) 0.080(5) -0.010(4) 0.033(4) -0.049(5)
C64 0.179(8) 0.250(12) 0.098(6) 0.041(7) -0.010(5) -0.022(8)
C71 0.047(2) 0.060(3) 0.065(3) 0.026(2) 0.009(2) 0.018(2)
C72 0.071(3) 0.096(4) 0.087(4) 0.037(4) -0.020(3) -0.004(3)
C73 0.138(5) 0.065(4) 0.068(4) 0.013(3) -0.006(4) -0.012(3)
C74 0.227(8) 0.112(5) 0.091(5) 0.008(4) 0.047(5) -0.034(5)
C81 0.051(3) 0.085(3) 0.113(4) 0.059(3) 0.039(3) 0.034(2)
C82 0.066(3) 0.090(3) 0.104(4) 0.061(3) 0.040(3) 0.038(3)
C83 0.108(4) 0.141(5) 0.184(6) 0.123(5) 0.089(4) 0.073(4)
C84 0.152(5) 0.113(5) 0.130(5) 0.077(4) 0.076(4) 0.057(4)
 
_geom_special_details
;
 All esds (except the esd in the dihedral angle between two l.s. planes)
 are estimated using the full covariance matrix.  The cell esds are taken
 into account individually in the estimation of esds in distances, angles
 and torsion angles; correlations between esds in cell parameters are only
 used when they are defined by crystal symmetry.  An approximate (isotropic)
 treatment of cell esds is used for estimating esds involving l.s. planes.
;
 
loop_
 _geom_bond_atom_site_label_1
 _geom_bond_atom_site_label_2
 _geom_bond_distance
 _geom_bond_site_symmetry_2
 _geom_bond_publ_flag
N1 C1 1.295(4) . ?
N1 B1 1.528(5) . ?
N1 H1B 0.8600 . ?
N2 C1 1.340(5) . ?
N2 C3 1.407(5) . ?
N2 H2B 0.8600 . ?
C1 C2 1.483(5) . ?
C2 H2D 0.9600 . ?
C2 H2E 0.9600 . ?
C2 H2F 0.9600 . ?
C3 C8 1.363(6) . ?
C3 C4 1.371(6) . ?
C4 C5 1.376(6) . ?
C4 H4B 0.9300 . ?
C5 C6 1.353(7) . ?
C5 H5B 0.9300 . ?
C6 C7 1.371(7) . ?
C6 H6B 0.9300 . ?
C7 C8 1.384(6) . ?
C7 H7B 0.9300 . ?
C8 H8B 0.9300 . ?
B1 B2 1.758(6) . ?
B1 B4 1.763(6) . ?
B1 B5 1.773(6) . ?
B1 B6 1.774(6) . ?
B1 B3 1.775(7) . ?
B2 B8 1.766(8) . ?
B2 B3 1.770(7) . ?
B2 B7 1.775(7) . ?
B2 B6 1.782(7) . ?
B2 H2 1.08(4) . ?
B3 B8 1.765(7) . ?
B3 B4 1.773(7) . ?
B3 B9 1.779(7) . ?
B3 H3 1.07(4) . ?
B4 B10 1.756(6) . ?
B4 B5 1.763(6) . ?
B4 B9 1.765(7) . ?
B4 H4 1.11(3) . ?
B5 B10 1.762(7) . ?
B5 B11 1.776(6) . ?
B5 B6 1.781(6) . ?
B5 H5 1.10(3) . ?
B6 B7 1.768(7) . ?
B6 B11 1.776(7) . ?
B6 H6 1.10(4) . ?
B7 B12 1.760(7) . ?
B7 B11 1.768(7) . ?
B7 B8 1.774(8) . ?
B7 H7 1.15(4) . ?
B8 B12 1.759(7) . ?
B8 B9 1.772(8) . ?
B8 H8 1.04(4) . ?
B9 B12 1.755(7) . ?
B9 B10 1.764(7) . ?
B9 H9 1.13(4) . ?
B10 B11 1.768(7) . ?
B10 B12 1.777(7) . ?
B10 H10 1.09(3) . ?
B11 B12 1.763(7) . ?
B11 H11 1.17(3) . ?
B12 H12 1.10(3) . ?
N1A C1A 1.292(5) . ?
N1A B1A 1.531(5) . ?
N1A H1C 0.8600 . ?
N2A C1A 1.315(5) . ?
N2A C3A 1.428(5) . ?
N2A H2C 0.8600 . ?
C1A C2A 1.484(5) . ?
C2A H2AB 0.9600 . ?
C2A H2AC 0.9600 . ?
C2A H2AD 0.9600 . ?
C3A C4A 1.351(5) . ?
C3A C8A 1.367(5) . ?
C4A C5A 1.388(6) . ?
C4A H4AA 0.9300 . ?
C5A C6A 1.354(7) . ?
C5A H5AA 0.9300 . ?
C6A C7A 1.343(6) . ?
C6A H6AA 0.9300 . ?
C7A C8A 1.379(6) . ?
C7A H7AA 0.9300 . ?
C8A H8AA 0.9300 . ?
B1A B4A 1.755(6) . ?
B1A B5A 1.760(6) . ?
B1A B6A 1.761(5) . ?
B1A B3A 1.761(6) . ?
B1A B2A 1.761(6) . ?
B2A B7A 1.750(7) . ?
B2A B8A 1.760(7) . ?
B2A B3A 1.766(6) . ?
B2A B6A 1.768(6) . ?
B2A H2A 1.02(3) . ?
B3A B9A 1.753(6) . ?
B3A B8A 1.760(6) . ?
B3A B4A 1.765(7) . ?
B3A H3A 1.12(3) . ?
B4A B9A 1.753(7) . ?
B4A B10A 1.766(6) . ?
B4A B5A 1.775(6) . ?
B4A H4A 1.14(3) . ?
B5A B6A 1.761(6) . ?
B5A B11A 1.766(6) . ?
B5A B10A 1.776(7) . ?
B5A H5A 1.12(3) . ?
B6A B11A 1.766(6) . ?
B6A B7A 1.772(7) . ?
B6A H6A 1.20(3) . ?
B7A B12A 1.761(7) . ?
B7A B11A 1.772(7) . ?
B7A B8A 1.776(6) . ?
B7A H7A 1.13(3) . ?
B8A B12A 1.771(7) . ?
B8A B9A 1.777(7) . ?
B8A H8A 1.15(3) . ?
B9A B10A 1.768(7) . ?
B9A B12A 1.780(6) . ?
B9A H9A 1.07(3) . ?
B10A B11A 1.775(7) . ?
B10A B12A 1.781(7) . ?
B10A H10A 1.11(4) . ?
B11A B12A 1.773(7) . ?
B11A H11A 1.12(3) . ?
B12A H12A 1.16(3) . ?
N3 C41 1.515(5) . ?
N3 C11 1.516(5) . ?
N3 C21 1.519(5) . ?
N3 C31 1.520(5) . ?
N4 C71 1.504(5) . ?
N4 C81 1.508(4) . ?
N4 C51 1.514(5) . ?
N4 C61 1.519(4) . ?
C11 C12 1.517(7) . ?
C11 H11B 0.9700 . ?
C11 H11C 0.9700 . ?
C12 C13 1.598(11) . ?
C12 H12B 0.9700 . ?
C12 H12C 0.9700 . ?
C13 C14 1.423(5) . ?
C13 H13A 0.9700 . ?
C13 H13B 0.9700 . ?
C14 H14A 0.9600 . ?
C14 H14B 0.9600 . ?
C14 H14C 0.9600 . ?
C21 C22 1.517(7) . ?
C21 H21A 0.9700 . ?
C21 H21B 0.9700 . ?
C22 C23B 1.518(7) . ?
C22 C23A 1.518(7) . ?
C22 H22A 0.9700 . ?
C22 H22B 0.9700 . ?
C23A C24A 1.442(5) . ?
C23A H23A 0.9700 . ?
C23A H23B 0.9700 . ?
C24A H24A 0.9600 . ?
C24A H24B 0.9600 . ?
C24A H24C 0.9600 . ?
C23B C24B 1.445(5) . ?
C23B H23C 0.9700 . ?
C23B H23D 0.9700 . ?
C24B H24D 0.9600 . ?
C24B H24E 0.9600 . ?
C24B H24F 0.9600 . ?
C31 C32 1.508(6) . ?
C31 H31A 0.9700 . ?
C31 H31B 0.9700 . ?
C32 C33 1.532(7) . ?
C32 H32A 0.9700 . ?
C32 H32B 0.9700 . ?
C33 C34 1.443(4) . ?
C33 H33A 0.9700 . ?
C33 H33B 0.9700 . ?
C34 H34A 0.9600 . ?
C34 H34B 0.9600 . ?
C34 H34C 0.9600 . ?
C41 C42 1.524(7) . ?
C41 H41A 0.9700 . ?
C41 H41B 0.9700 . ?
C42 C43B 1.527(7) . ?
C42 C43A 1.527(7) . ?
C42 H42A 0.9700 . ?
C42 H42B 0.9700 . ?
C43A C44A 1.442(5) . ?
C43A H43A 0.9700 . ?
C43A H43B 0.9700 . ?
C44A H44A 0.9600 . ?
C44A H44B 0.9600 . ?
C44A H44C 0.9600 . ?
C43B C44B 1.445(5) . ?
C43B H43C 0.9700 . ?
C43B H43D 0.9700 . ?
C44B H44D 0.9600 . ?
C44B H44E 0.9600 . ?
C44B H44F 0.9600 . ?
C51 C52 1.490(5) . ?
C51 H51A 0.9700 . ?
C51 H51B 0.9700 . ?
C52 C53B 1.475(6) . ?
C52 C53A 1.475(6) . ?
C52 H52A 0.9700 . ?
C52 H52B 0.9700 . ?
C53A C54A 1.451(5) . ?
C53A H53A 0.9700 . ?
C53A H53B 0.9700 . ?
C54A H54A 0.9600 . ?
C54A H54B 0.9600 . ?
C54A H54C 0.9600 . ?
C53B C54B 1.446(5) . ?
C53B H53C 0.9700 . ?
C53B H53D 0.9700 . ?
C54B H54D 0.9600 . ?
C54B H54E 0.9600 . ?
C54B H54F 0.9600 . ?
C61 C62 1.517(6) . ?
C61 H61A 0.9700 . ?
C61 H61B 0.9700 . ?
C62 C63 1.578(8) . ?
C62 H62A 0.9700 . ?
C62 H62B 0.9700 . ?
C63 C64 1.449(5) . ?
C63 H63A 0.9700 . ?
C63 H63B 0.9700 . ?
C64 H64A 0.9600 . ?
C64 H64B 0.9600 . ?
C64 H64C 0.9600 . ?
C71 C72 1.514(5) . ?
C71 H71A 0.9700 . ?
C71 H71B 0.9700 . ?
C72 C73 1.520(7) . ?
C72 H72A 0.9700 . ?
C72 H72B 0.9700 . ?
C73 C74 1.451(4) . ?
C73 H73A 0.9700 . ?
C73 H73B 0.9700 . ?
C74 H74A 0.9600 . ?
C74 H74B 0.9600 . ?
C74 H74C 0.9600 . ?
C81 C82 1.504(5) . ?
C81 H81A 0.9700 . ?
C81 H81B 0.9700 . ?
C82 C83 1.509(6) . ?
C82 H82A 0.9700 . ?
C82 H82B 0.9700 . ?
C83 C84 1.451(4) . ?
C83 H83A 0.9700 . ?
C83 H83B 0.9700 . ?
C84 H84A 0.9600 . ?
C84 H84B 0.9600 . ?
C84 H84C 0.9600 . ?
 
loop_
 _geom_angle_atom_site_label_1
 _geom_angle_atom_site_label_2
 _geom_angle_atom_site_label_3
 _geom_angle
 _geom_angle_site_symmetry_1
 _geom_angle_site_symmetry_3
 _geom_angle_publ_flag
C1 N1 B1 130.9(3) . . ?
C1 N1 H1B 114.5 . . ?
B1 N1 H1B 114.5 . . ?
C1 N2 C3 131.2(3) . . ?
C1 N2 H2B 114.4 . . ?
C3 N2 H2B 114.4 . . ?
N1 C1 N2 119.2(3) . . ?
N1 C1 C2 120.3(4) . . ?
N2 C1 C2 120.5(4) . . ?
C1 C2 H2D 109.5 . . ?
C1 C2 H2E 109.5 . . ?
H2D C2 H2E 109.5 . . ?
C1 C2 H2F 109.5 . . ?
H2D C2 H2F 109.5 . . ?
H2E C2 H2F 109.5 . . ?
C8 C3 C4 119.9(4) . . ?
C8 C3 N2 122.7(4) . . ?
C4 C3 N2 117.3(4) . . ?
C3 C4 C5 119.9(5) . . ?
C3 C4 H4B 120.1 . . ?
C5 C4 H4B 120.1 . . ?
C6 C5 C4 120.9(5) . . ?
C6 C5 H5B 119.6 . . ?
C4 C5 H5B 119.6 . . ?
C5 C6 C7 119.2(5) . . ?
C5 C6 H6B 120.4 . . ?
C7 C6 H6B 120.4 . . ?
C6 C7 C8 120.6(5) . . ?
C6 C7 H7B 119.7 . . ?
C8 C7 H7B 119.7 . . ?
C3 C8 C7 119.5(5) . . ?
C3 C8 H8B 120.2 . . ?
C7 C8 H8B 120.2 . . ?
N1 B1 B2 125.7(3) . . ?
N1 B1 B4 117.0(3) . . ?
B2 B1 B4 108.1(3) . . ?
N1 B1 B5 119.1(3) . . ?
B2 B1 B5 108.7(3) . . ?
B4 B1 B5 59.8(2) . . ?
N1 B1 B6 124.7(4) . . ?
B2 B1 B6 60.6(3) . . ?
B4 B1 B6 108.1(3) . . ?
B5 B1 B6 60.3(3) . . ?
N1 B1 B3 120.4(3) . . ?
B2 B1 B3 60.1(3) . . ?
B4 B1 B3 60.2(3) . . ?
B5 B1 B3 108.5(3) . . ?
B6 B1 B3 108.8(3) . . ?
B1 B2 B8 108.0(4) . . ?
B1 B2 B3 60.4(3) . . ?
B8 B2 B3 59.9(3) . . ?
B1 B2 B7 107.7(3) . . ?
B8 B2 B7 60.1(3) . . ?
B3 B2 B7 108.2(3) . . ?
B1 B2 B6 60.2(3) . . ?
B8 B2 B6 108.0(3) . . ?
B3 B2 B6 108.7(3) . . ?
B7 B2 B6 59.6(3) . . ?
B1 B2 H2 123(2) . . ?
B8 B2 H2 119(2) . . ?
B3 B2 H2 120(2) . . ?
B7 B2 H2 121.9(19) . . ?
B6 B2 H2 124(2) . . ?
B8 B3 B2 59.9(3) . . ?
B8 B3 B4 107.4(3) . . ?
B2 B3 B4 107.1(4) . . ?
B8 B3 B1 107.2(4) . . ?
B2 B3 B1 59.5(3) . . ?
B4 B3 B1 59.6(3) . . ?
B8 B3 B9 60.0(3) . . ?
B2 B3 B9 107.6(3) . . ?
B4 B3 B9 59.6(3) . . ?
B1 B3 B9 107.1(3) . . ?
B8 B3 H3 129(2) . . ?
B2 B3 H3 124(2) . . ?
B4 B3 H3 116(2) . . ?
B1 B3 H3 117(2) . . ?
B9 B3 H3 123.3(19) . . ?
B10 B4 B5 60.1(3) . . ?
B10 B4 B1 108.3(3) . . ?
B5 B4 B1 60.4(3) . . ?
B10 B4 B9 60.1(3) . . ?
B5 B4 B9 108.4(3) . . ?
B1 B4 B9 108.3(3) . . ?
B10 B4 B3 108.8(3) . . ?
B5 B4 B3 109.0(3) . . ?
B1 B4 B3 60.3(3) . . ?
B9 B4 B3 60.4(3) . . ?
B10 B4 H4 121.3(17) . . ?
B5 B4 H4 121.4(18) . . ?
B1 B4 H4 121.9(17) . . ?
B9 B4 H4 121.3(17) . . ?
B3 B4 H4 121.1(17) . . ?
B10 B5 B4 59.8(3) . . ?
B10 B5 B1 107.7(3) . . ?
B4 B5 B1 59.8(3) . . ?
B10 B5 B11 60.0(3) . . ?
B4 B5 B11 107.5(3) . . ?
B1 B5 B11 107.5(3) . . ?
B10 B5 B6 108.1(3) . . ?
B4 B5 B6 107.8(3) . . ?
B1 B5 B6 59.9(2) . . ?
B11 B5 B6 59.9(3) . . ?
B10 B5 H5 124.0(18) . . ?
B4 B5 H5 117.2(18) . . ?
B1 B5 H5 116.6(17) . . ?
B11 B5 H5 128.3(17) . . ?
B6 B5 H5 122.8(18) . . ?
B7 B6 B1 107.3(4) . . ?
B7 B6 B11 59.8(3) . . ?
B1 B6 B11 107.4(3) . . ?
B7 B6 B5 107.7(4) . . ?
B1 B6 B5 59.8(2) . . ?
B11 B6 B5 59.9(3) . . ?
B7 B6 B2 60.0(3) . . ?
B1 B6 B2 59.3(3) . . ?
B11 B6 B2 107.6(4) . . ?
B5 B6 B2 107.3(3) . . ?
B7 B6 H6 124.6(19) . . ?
B1 B6 H6 117.3(18) . . ?
B11 B6 H6 127.2(18) . . ?
B5 B6 H6 122(2) . . ?
B2 B6 H6 118.5(19) . . ?
B12 B7 B11 60.0(3) . . ?
B12 B7 B6 108.2(4) . . ?
B11 B7 B6 60.3(3) . . ?
B12 B7 B8 59.7(3) . . ?
B11 B7 B8 107.9(4) . . ?
B6 B7 B8 108.2(3) . . ?
B12 B7 B2 107.4(3) . . ?
B11 B7 B2 108.2(3) . . ?
B6 B7 B2 60.4(3) . . ?
B8 B7 B2 59.7(3) . . ?
B12 B7 H7 125.2(18) . . ?
B11 B7 H7 123.1(19) . . ?
B6 B7 H7 119.0(19) . . ?
B8 B7 H7 122.3(19) . . ?
B2 B7 H7 118.9(18) . . ?
B12 B8 B3 108.2(4) . . ?
B12 B8 B2 107.9(4) . . ?
B3 B8 B2 60.2(3) . . ?
B12 B8 B9 59.6(3) . . ?
B3 B8 B9 60.4(3) . . ?
B2 B8 B9 108.1(4) . . ?
B12 B8 B7 59.8(3) . . ?
B3 B8 B7 108.5(4) . . ?
B2 B8 B7 60.2(3) . . ?
B9 B8 B7 107.6(4) . . ?
B12 B8 H8 119(2) . . ?
B3 B8 H8 121(2) . . ?
B2 B8 H8 126(2) . . ?
B9 B8 H8 117(2) . . ?
B7 B8 H8 124(2) . . ?
B12 B9 B10 60.7(3) . . ?
B12 B9 B4 107.8(4) . . ?
B10 B9 B4 59.7(3) . . ?
B12 B9 B8 59.8(3) . . ?
B10 B9 B8 108.4(4) . . ?
B4 B9 B8 107.4(4) . . ?
B12 B9 B3 107.8(4) . . ?
B10 B9 B3 108.2(4) . . ?
B4 B9 B3 60.0(3) . . ?
B8 B9 B3 59.6(3) . . ?
B12 B9 H9 123.4(18) . . ?
B10 B9 H9 125.5(19) . . ?
B4 B9 H9 122.8(19) . . ?
B8 B9 H9 119(2) . . ?
B3 B9 H9 118.1(18) . . ?
B4 B10 B5 60.1(2) . . ?
B4 B10 B9 60.2(3) . . ?
B5 B10 B9 108.5(3) . . ?
B4 B10 B11 108.1(3) . . ?
B5 B10 B11 60.4(3) . . ?
B9 B10 B11 107.8(4) . . ?
B4 B10 B12 107.3(3) . . ?
B5 B10 B12 107.8(3) . . ?
B9 B10 B12 59.4(3) . . ?
B11 B10 B12 59.6(3) . . ?
B4 B10 H10 122.5(18) . . ?
B5 B10 H10 123.5(19) . . ?
B9 B10 H10 119.9(19) . . ?
B11 B10 H10 122.3(18) . . ?
B12 B10 H10 120.6(18) . . ?
B12 B11 B7 59.8(3) . . ?
B12 B11 B10 60.4(3) . . ?
B7 B11 B10 108.3(4) . . ?
B12 B11 B5 107.8(3) . . ?
B7 B11 B5 108.0(3) . . ?
B10 B11 B5 59.6(3) . . ?
B12 B11 B6 107.7(4) . . ?
B7 B11 B6 59.9(3) . . ?
B10 B11 B6 108.0(3) . . ?
B5 B11 B6 60.2(3) . . ?
B12 B11 H11 123.8(17) . . ?
B7 B11 H11 123.9(17) . . ?
B10 B11 H11 120.6(17) . . ?
B5 B11 H11 119.3(18) . . ?
B6 B11 H11 121.1(17) . . ?
B9 B12 B8 60.6(3) . . ?
B9 B12 B7 109.0(3) . . ?
B8 B12 B7 60.6(3) . . ?
B9 B12 B11 108.4(3) . . ?
B8 B12 B11 108.8(4) . . ?
B7 B12 B11 60.2(3) . . ?
B9 B12 B10 59.9(3) . . ?
B8 B12 B10 108.3(3) . . ?
B7 B12 B10 108.2(4) . . ?
B11 B12 B10 59.9(3) . . ?
B9 B12 H12 119.8(19) . . ?
B8 B12 H12 122.8(19) . . ?
B7 B12 H12 123.6(19) . . ?
B11 B12 H12 121.2(19) . . ?
B10 B12 H12 119.3(19) . . ?
C1A N1A B1A 131.4(3) . . ?
C1A N1A H1C 114.3 . . ?
B1A N1A H1C 114.3 . . ?
C1A N2A C3A 128.3(3) . . ?
C1A N2A H2C 115.8 . . ?
C3A N2A H2C 115.8 . . ?
N1A C1A N2A 119.9(4) . . ?
N1A C1A C2A 121.1(4) . . ?
N2A C1A C2A 119.0(4) . . ?
C1A C2A H2AB 109.5 . . ?
C1A C2A H2AC 109.5 . . ?
H2AB C2A H2AC 109.5 . . ?
C1A C2A H2AD 109.5 . . ?
H2AB C2A H2AD 109.5 . . ?
H2AC C2A H2AD 109.5 . . ?
C4A C3A C8A 119.8(4) . . ?
C4A C3A N2A 119.6(4) . . ?
C8A C3A N2A 120.6(4) . . ?
C3A C4A C5A 120.4(4) . . ?
C3A C4A H4AA 119.8 . . ?
C5A C4A H4AA 119.8 . . ?
C6A C5A C4A 119.7(5) . . ?
C6A C5A H5AA 120.2 . . ?
C4A C5A H5AA 120.2 . . ?
C7A C6A C5A 119.6(5) . . ?
C7A C6A H6AA 120.2 . . ?
C5A C6A H6AA 120.2 . . ?
C6A C7A C8A 121.6(5) . . ?
C6A C7A H7AA 119.2 . . ?
C8A C7A H7AA 119.2 . . ?
C3A C8A C7A 118.9(4) . . ?
C3A C8A H8AA 120.6 . . ?
C7A C8A H8AA 120.6 . . ?
N1A B1A B4A 121.2(3) . . ?
N1A B1A B5A 125.4(3) . . ?
B4A B1A B5A 60.7(3) . . ?
N1A B1A B6A 123.7(3) . . ?
B4A B1A B6A 108.8(3) . . ?
B5A B1A B6A 60.0(2) . . ?
N1A B1A B3A 117.1(3) . . ?
B4A B1A B3A 60.3(3) . . ?
B5A B1A B3A 108.9(3) . . ?
B6A B1A B3A 108.8(3) . . ?
N1A B1A B2A 118.9(3) . . ?
B4A B1A B2A 108.4(3) . . ?
B5A B1A B2A 108.4(3) . . ?
B6A B1A B2A 60.3(2) . . ?
B3A B1A B2A 60.2(3) . . ?
B7A B2A B8A 60.8(3) . . ?
B7A B2A B1A 108.1(3) . . ?
B8A B2A B1A 108.1(3) . . ?
B7A B2A B3A 108.4(3) . . ?
B8A B2A B3A 59.9(3) . . ?
B1A B2A B3A 59.9(2) . . ?
B7A B2A B6A 60.5(3) . . ?
B8A B2A B6A 109.2(3) . . ?
B1A B2A B6A 59.8(2) . . ?
B3A B2A B6A 108.3(3) . . ?
B7A B2A H2A 125.3(19) . . ?
B8A B2A H2A 122(2) . . ?
B1A B2A H2A 119(2) . . ?
B3A B2A H2A 118.2(19) . . ?
B6A B2A H2A 123(2) . . ?
B9A B3A B8A 60.8(3) . . ?
B9A B3A B1A 107.6(3) . . ?
B8A B3A B1A 108.1(3) . . ?
B9A B3A B4A 59.8(3) . . ?
B8A B3A B4A 108.6(3) . . ?
B1A B3A B4A 59.7(3) . . ?
B9A B3A B2A 108.1(3) . . ?
B8A B3A B2A 59.9(3) . . ?
B1A B3A B2A 59.9(3) . . ?
B4A B3A B2A 107.8(3) . . ?
B9A B3A H3A 120.6(17) . . ?
B8A B3A H3A 120.9(16) . . ?
B1A B3A H3A 122.9(17) . . ?
B4A B3A H3A 121.4(16) . . ?
B2A B3A H3A 122.8(17) . . ?
B9A B4A B1A 107.8(3) . . ?
B9A B4A B3A 59.8(3) . . ?
B1A B4A B3A 60.0(3) . . ?
B9A B4A B10A 60.3(3) . . ?
B1A B4A B10A 107.9(3) . . ?
B3A B4A B10A 108.1(3) . . ?
B9A B4A B5A 108.4(3) . . ?
B1A B4A B5A 59.8(2) . . ?
B3A B4A B5A 108.1(3) . . ?
B10A B4A B5A 60.2(2) . . ?
B9A B4A H4A 121.4(17) . . ?
B1A B4A H4A 121.2(17) . . ?
B3A B4A H4A 120.2(17) . . ?
B10A B4A H4A 123.0(17) . . ?
B5A B4A H4A 122.6(17) . . ?
B1A B5A B6A 60.0(2) . . ?
B1A B5A B11A 107.6(3) . . ?
B6A B5A B11A 60.1(3) . . ?
B1A B5A B4A 59.5(2) . . ?
B6A B5A B4A 107.9(3) . . ?
B11A B5A B4A 107.7(3) . . ?
B1A B5A B10A 107.2(3) . . ?
B6A B5A B10A 108.2(3) . . ?
B11A B5A B10A 60.1(3) . . ?
B4A B5A B10A 59.6(3) . . ?
B1A B5A H5A 121.9(17) . . ?
B6A B5A H5A 118.5(17) . . ?
B11A B5A H5A 120.2(16) . . ?
B4A B5A H5A 124.8(17) . . ?
B10A B5A H5A 123.9(18) . . ?
B1A B6A B5A 60.0(2) . . ?
B1A B6A B11A 107.6(3) . . ?
B5A B6A B11A 60.1(3) . . ?
B1A B6A B2A 59.9(2) . . ?
B5A B6A B2A 108.0(3) . . ?
B11A B6A B2A 107.4(3) . . ?
B1A B6A B7A 107.2(3) . . ?
B5A B6A B7A 108.1(3) . . ?
B11A B6A B7A 60.1(3) . . ?
B2A B6A B7A 59.2(3) . . ?
B1A B6A H6A 119.6(15) . . ?
B5A B6A H6A 118.6(15) . . ?
B11A B6A H6A 122.6(15) . . ?
B2A B6A H6A 123.4(15) . . ?
B7A B6A H6A 125.4(15) . . ?
B2A B7A B12A 107.9(3) . . ?
B2A B7A B6A 60.3(3) . . ?
B12A B7A B6A 108.1(3) . . ?
B2A B7A B11A 108.0(3) . . ?
B12A B7A B11A 60.2(3) . . ?
B6A B7A B11A 59.8(3) . . ?
B2A B7A B8A 59.9(3) . . ?
B12A B7A B8A 60.1(3) . . ?
B6A B7A B8A 108.3(3) . . ?
B11A B7A B8A 108.3(3) . . ?
B2A B7A H7A 120.2(18) . . ?
B12A B7A H7A 123.3(18) . . ?
B6A B7A H7A 120.5(18) . . ?
B11A B7A H7A 122.5(18) . . ?
B8A B7A H7A 121.6(18) . . ?
B2A B8A B3A 60.2(3) . . ?
B2A B8A B12A 107.0(3) . . ?
B3A B8A B12A 107.7(3) . . ?
B2A B8A B7A 59.3(3) . . ?
B3A B8A B7A 107.6(3) . . ?
B12A B8A B7A 59.5(3) . . ?
B2A B8A B9A 107.3(3) . . ?
B3A B8A B9A 59.4(2) . . ?
B12A B8A B9A 60.2(3) . . ?
B7A B8A B9A 107.4(3) . . ?
B2A B8A H8A 126.3(18) . . ?
B3A B8A H8A 121.6(16) . . ?
B12A B8A H8A 119.5(17) . . ?
B7A B8A H8A 124.7(16) . . ?
B9A B8A H8A 118.0(17) . . ?
B3A B9A B4A 60.5(3) . . ?
B3A B9A B10A 108.6(3) . . ?
B4A B9A B10A 60.2(3) . . ?
B3A B9A B8A 59.8(3) . . ?
B4A B9A B8A 108.4(3) . . ?
B10A B9A B8A 108.4(3) . . ?
B3A B9A B12A 107.6(3) . . ?
B4A B9A B12A 108.1(3) . . ?
B10A B9A B12A 60.3(3) . . ?
B8A B9A B12A 59.7(3) . . ?
B3A B9A H9A 120.8(18) . . ?
B4A B9A H9A 122.7(17) . . ?
B10A B9A H9A 122.9(18) . . ?
B8A B9A H9A 119.8(18) . . ?
B12A B9A H9A 121.7(17) . . ?
B4A B10A B9A 59.5(3) . . ?
B4A B10A B11A 107.7(3) . . ?
B9A B10A B11A 107.9(3) . . ?
B4A B10A B5A 60.1(2) . . ?
B9A B10A B5A 107.7(3) . . ?
B11A B10A B5A 59.6(3) . . ?
B4A B10A B12A 107.5(3) . . ?
B9A B10A B12A 60.2(3) . . ?
B11A B10A B12A 59.8(3) . . ?
B5A B10A B12A 107.4(3) . . ?
B4A B10A H10A 121.1(17) . . ?
B9A B10A H10A 120.4(19) . . ?
B11A B10A H10A 123.3(18) . . ?
B5A B10A H10A 122.7(19) . . ?
B12A B10A H10A 122.0(18) . . ?
B5A B11A B6A 59.8(2) . . ?
B5A B11A B7A 107.9(3) . . ?
B6A B11A B7A 60.1(3) . . ?
B5A B11A B12A 108.2(3) . . ?
B6A B11A B12A 107.8(3) . . ?
B7A B11A B12A 59.6(3) . . ?
B5A B11A B10A 60.2(3) . . ?
B6A B11A B10A 108.0(3) . . ?
B7A B11A B10A 107.9(3) . . ?
B12A B11A B10A 60.3(3) . . ?
B5A B11A H11A 120.4(17) . . ?
B6A B11A H11A 121.9(18) . . ?
B7A B11A H11A 123.2(17) . . ?
B12A B11A H11A 122.4(18) . . ?
B10A B11A H11A 120.7(17) . . ?
B7A B12A B8A 60.4(3) . . ?
B7A B12A B11A 60.2(3) . . ?
B8A B12A B11A 108.5(3) . . ?
B7A B12A B9A 107.9(3) . . ?
B8A B12A B9A 60.1(3) . . ?
B11A B12A B9A 107.5(3) . . ?
B7A B12A B10A 108.1(3) . . ?
B8A B12A B10A 108.1(3) . . ?
B11A B12A B10A 59.9(3) . . ?
B9A B12A B10A 59.5(3) . . ?
B7A B12A H12A 119.1(17) . . ?
B8A B12A H12A 122.7(17) . . ?
B11A B12A H12A 118.7(17) . . ?
B9A B12A H12A 125.4(17) . . ?
B10A B12A H12A 122.4(17) . . ?
C41 N3 C11 111.4(4) . . ?
C41 N3 C21 110.7(4) . . ?
C11 N3 C21 105.7(3) . . ?
C41 N3 C31 105.5(3) . . ?
C11 N3 C31 110.7(4) . . ?
C21 N3 C31 112.8(4) . . ?
C71 N4 C81 111.6(3) . . ?
C71 N4 C51 110.9(3) . . ?
C81 N4 C51 106.5(3) . . ?
C71 N4 C61 105.3(3) . . ?
C81 N4 C61 111.1(3) . . ?
C51 N4 C61 111.6(3) . . ?
N3 C11 C12 115.3(4) . . ?
N3 C11 H11B 108.5 . . ?
C12 C11 H11B 108.5 . . ?
N3 C11 H11C 108.5 . . ?
C12 C11 H11C 108.5 . . ?
H11B C11 H11C 107.5 . . ?
C11 C12 C13 108.0(6) . . ?
C11 C12 H12B 110.1 . . ?
C13 C12 H12B 110.1 . . ?
C11 C12 H12C 110.1 . . ?
C13 C12 H12C 110.1 . . ?
H12B C12 H12C 108.4 . . ?
C14 C13 C12 108.6(13) . . ?
C14 C13 H13A 110.0 . . ?
C12 C13 H13A 110.0 . . ?
C14 C13 H13B 110.0 . . ?
C12 C13 H13B 110.0 . . ?
H13A C13 H13B 108.3 . . ?
C13 C14 H14A 109.5 . . ?
C13 C14 H14B 109.5 . . ?
H14A C14 H14B 109.5 . . ?
C13 C14 H14C 109.5 . . ?
H14A C14 H14C 109.5 . . ?
H14B C14 H14C 109.5 . . ?
C22 C21 N3 115.4(4) . . ?
C22 C21 H21A 108.4 . . ?
N3 C21 H21A 108.4 . . ?
C22 C21 H21B 108.4 . . ?
N3 C21 H21B 108.4 . . ?
H21A C21 H21B 107.5 . . ?
C21 C22 C23B 110.2(5) . . ?
C21 C22 C23A 110.2(5) . . ?
C21 C22 H22A 109.6 . . ?
C23A C22 H22A 109.6 . . ?
C21 C22 H22B 109.6 . . ?
C23A C22 H22B 109.6 . . ?
H22A C22 H22B 108.1 . . ?
C24A C23A C22 121.9(10) . . ?
C24A C23A H23A 106.9 . . ?
C22 C23A H23A 106.9 . . ?
C24A C23A H23B 106.9 . . ?
C22 C23A H23B 106.9 . . ?
H23A C23A H23B 106.7 . . ?
C23A C24A H24A 109.5 . . ?
C23A C24A H24B 109.5 . . ?
H24A C24A H24B 109.5 . . ?
C23A C24A H24C 109.5 . . ?
H24A C24A H24C 109.5 . . ?
H24B C24A H24C 109.5 . . ?
C24B C23B C22 109.3(9) . . ?
C24B C23B H23C 109.8 . . ?
C22 C23B H23C 109.8 . . ?
C24B C23B H23D 109.8 . . ?
C22 C23B H23D 109.8 . . ?
H23C C23B H23D 108.3 . . ?
C23B C24B H24D 109.5 . . ?
C23B C24B H24E 109.5 . . ?
H24D C24B H24E 109.5 . . ?
C23B C24B H24F 109.5 . . ?
H24D C24B H24F 109.5 . . ?
H24E C24B H24F 109.5 . . ?
C32 C31 N3 115.3(4) . . ?
C32 C31 H31A 108.5 . . ?
N3 C31 H31A 108.5 . . ?
C32 C31 H31B 108.5 . . ?
N3 C31 H31B 108.5 . . ?
H31A C31 H31B 107.5 . . ?
C31 C32 C33 110.8(4) . . ?
C31 C32 H32A 109.5 . . ?
C33 C32 H32A 109.5 . . ?
C31 C32 H32B 109.5 . . ?
C33 C32 H32B 109.5 . . ?
H32A C32 H32B 108.1 . . ?
C34 C33 C32 114.6(6) . . ?
C34 C33 H33A 108.6 . . ?
C32 C33 H33A 108.6 . . ?
C34 C33 H33B 108.6 . . ?
C32 C33 H33B 108.6 . . ?
H33A C33 H33B 107.6 . . ?
C33 C34 H34A 109.5 . . ?
C33 C34 H34B 109.5 . . ?
H34A C34 H34B 109.5 . . ?
C33 C34 H34C 109.5 . . ?
H34A C34 H34C 109.5 . . ?
H34B C34 H34C 109.5 . . ?
N3 C41 C42 115.9(4) . . ?
N3 C41 H41A 108.3 . . ?
C42 C41 H41A 108.3 . . ?
N3 C41 H41B 108.3 . . ?
C42 C41 H41B 108.3 . . ?
H41A C41 H41B 107.4 . . ?
C41 C42 C43B 110.2(5) . . ?
C41 C42 C43A 110.2(5) . . ?
C41 C42 H42A 109.6 . . ?
C43A C42 H42A 109.6 . . ?
C41 C42 H42B 109.6 . . ?
C43A C42 H42B 109.6 . . ?
H42A C42 H42B 108.1 . . ?
C44A C43A C42 116.3(8) . . ?
C44A C43A H43A 108.2 . . ?
C42 C43A H43A 108.2 . . ?
C44A C43A H43B 108.2 . . ?
C42 C43A H43B 108.2 . . ?
H43A C43A H43B 107.4 . . ?
C43A C44A H44A 109.5 . . ?
C43A C44A H44B 109.5 . . ?
H44A C44A H44B 109.5 . . ?
C43A C44A H44C 109.5 . . ?
H44A C44A H44C 109.5 . . ?
H44B C44A H44C 109.5 . . ?
C44B C43B C42 110.4(8) . . ?
C44B C43B H43C 109.6 . . ?
C42 C43B H43C 109.6 . . ?
C44B C43B H43D 109.6 . . ?
C42 C43B H43D 109.6 . . ?
H43C C43B H43D 108.1 . . ?
C43B C44B H44D 109.5 . . ?
C43B C44B H44E 109.5 . . ?
H44D C44B H44E 109.5 . . ?
C43B C44B H44F 109.5 . . ?
H44D C44B H44F 109.5 . . ?
H44E C44B H44F 109.5 . . ?
C52 C51 N4 116.3(3) . . ?
C52 C51 H51A 108.2 . . ?
N4 C51 H51A 108.2 . . ?
C52 C51 H51B 108.2 . . ?
N4 C51 H51B 108.2 . . ?
H51A C51 H51B 107.4 . . ?
C53B C52 C51 113.2(4) . . ?
C53A C52 C51 113.2(4) . . ?
C53A C52 H52A 108.9 . . ?
C51 C52 H52A 108.9 . . ?
C53A C52 H52B 108.9 . . ?
C51 C52 H52B 108.9 . . ?
H52A C52 H52B 107.8 . . ?
C54A C53A C52 114.9(6) . . ?
C54A C53A H53A 108.5 . . ?
C52 C53A H53A 108.5 . . ?
C54A C53A H53B 108.5 . . ?
C52 C53A H53B 108.5 . . ?
H53A C53A H53B 107.5 . . ?
C53A C54A H54A 109.5 . . ?
C53A C54A H54B 109.5 . . ?
H54A C54A H54B 109.5 . . ?
C53A C54A H54C 109.5 . . ?
H54A C54A H54C 109.5 . . ?
H54B C54A H54C 109.5 . . ?
C54B C53B C52 109.0(14) . . ?
C54B C53B H53C 109.9 . . ?
C52 C53B H53C 109.9 . . ?
C54B C53B H53D 109.9 . . ?
C52 C53B H53D 109.9 . . ?
H53C C53B H53D 108.3 . . ?
C53B C54B H54D 109.5 . . ?
C53B C54B H54E 109.5 . . ?
H54D C54B H54E 109.5 . . ?
C53B C54B H54F 109.5 . . ?
H54D C54B H54F 109.5 . . ?
H54E C54B H54F 109.5 . . ?
C62 C61 N4 117.3(4) . . ?
C62 C61 H61A 108.0 . . ?
N4 C61 H61A 108.0 . . ?
C62 C61 H61B 108.0 . . ?
N4 C61 H61B 108.0 . . ?
H61A C61 H61B 107.2 . . ?
C61 C62 C63 108.6(4) . . ?
C61 C62 H62A 110.0 . . ?
C63 C62 H62A 110.0 . . ?
C61 C62 H62B 110.0 . . ?
C63 C62 H62B 110.0 . . ?
H62A C62 H62B 108.3 . . ?
C64 C63 C62 110.4(5) . . ?
C64 C63 H63A 109.6 . . ?
C62 C63 H63A 109.6 . . ?
C64 C63 H63B 109.6 . . ?
C62 C63 H63B 109.6 . . ?
H63A C63 H63B 108.1 . . ?
C63 C64 H64A 109.5 . . ?
C63 C64 H64B 109.5 . . ?
H64A C64 H64B 109.5 . . ?
C63 C64 H64C 109.5 . . ?
H64A C64 H64C 109.5 . . ?
H64B C64 H64C 109.5 . . ?
N4 C71 C72 117.1(4) . . ?
N4 C71 H71A 108.0 . . ?
C72 C71 H71A 108.0 . . ?
N4 C71 H71B 108.0 . . ?
C72 C71 H71B 108.0 . . ?
H71A C71 H71B 107.3 . . ?
C71 C72 C73 111.4(4) . . ?
C71 C72 H72A 109.4 . . ?
C73 C72 H72A 109.4 . . ?
C71 C72 H72B 109.4 . . ?
C73 C72 H72B 109.4 . . ?
H72A C72 H72B 108.0 . . ?
C74 C73 C72 113.6(5) . . ?
C74 C73 H73A 108.8 . . ?
C72 C73 H73A 108.8 . . ?
C74 C73 H73B 108.8 . . ?
C72 C73 H73B 108.8 . . ?
H73A C73 H73B 107.7 . . ?
C73 C74 H74A 109.5 . . ?
C73 C74 H74B 109.5 . . ?
H74A C74 H74B 109.5 . . ?
C73 C74 H74C 109.5 . . ?
H74A C74 H74C 109.5 . . ?
H74B C74 H74C 109.5 . . ?
C82 C81 N4 117.0(3) . . ?
C82 C81 H81A 108.0 . . ?
N4 C81 H81A 108.0 . . ?
C82 C81 H81B 108.0 . . ?
N4 C81 H81B 108.0 . . ?
H81A C81 H81B 107.3 . . ?
C81 C82 C83 112.4(3) . . ?
C81 C82 H82A 109.1 . . ?
C83 C82 H82A 109.1 . . ?
C81 C82 H82B 109.1 . . ?
C83 C82 H82B 109.1 . . ?
H82A C82 H82B 107.9 . . ?
C84 C83 C82 115.8(4) . . ?
C84 C83 H83A 108.3 . . ?
C82 C83 H83A 108.3 . . ?
C84 C83 H83B 108.3 . . ?
C82 C83 H83B 108.3 . . ?
H83A C83 H83B 107.4 . . ?
C83 C84 H84A 109.5 . . ?
C83 C84 H84B 109.5 . . ?
H84A C84 H84B 109.5 . . ?
C83 C84 H84C 109.5 . . ?
H84A C84 H84C 109.5 . . ?
H84B C84 H84C 109.5 . . ?
 
loop_
 _geom_torsion_atom_site_label_1
 _geom_torsion_atom_site_label_2
 _geom_torsion_atom_site_label_3
 _geom_torsion_atom_site_label_4
 _geom_torsion
 _geom_torsion_site_symmetry_1
 _geom_torsion_site_symmetry_2
 _geom_torsion_site_symmetry_3
 _geom_torsion_site_symmetry_4
 _geom_torsion_publ_flag
B1 N1 C1 N2 -2.1(6) . . . . ?
B1 N1 C1 C2 178.2(4) . . . . ?
C3 N2 C1 N1 -177.6(4) . . . . ?
C3 N2 C1 C2 2.1(7) . . . . ?
C1 N2 C3 C8 -43.0(7) . . . . ?
C1 N2 C3 C4 140.7(4) . . . . ?
C8 C3 C4 C5 0.1(7) . . . . ?
N2 C3 C4 C5 176.5(4) . . . . ?
C3 C4 C5 C6 0.5(8) . . . . ?
C4 C5 C6 C7 -0.6(8) . . . . ?
C5 C6 C7 C8 0.1(8) . . . . ?
C4 C3 C8 C7 -0.6(7) . . . . ?
N2 C3 C8 C7 -176.7(4) . . . . ?
C6 C7 C8 C3 0.5(7) . . . . ?
C1 N1 B1 B2 34.9(7) . . . . ?
C1 N1 B1 B4 177.7(4) . . . . ?
C1 N1 B1 B5 -113.6(5) . . . . ?
C1 N1 B1 B6 -41.3(6) . . . . ?
C1 N1 B1 B3 108.1(5) . . . . ?
N1 B1 B2 B8 145.6(4) . . . . ?
B4 B1 B2 B8 0.1(4) . . . . ?
B5 B1 B2 B8 -63.3(4) . . . . ?
B6 B1 B2 B8 -100.9(4) . . . . ?
B3 B1 B2 B8 37.8(3) . . . . ?
N1 B1 B2 B3 107.8(5) . . . . ?
B4 B1 B2 B3 -37.6(3) . . . . ?
B5 B1 B2 B3 -101.0(4) . . . . ?
B6 B1 B2 B3 -138.6(3) . . . . ?
N1 B1 B2 B7 -150.9(4) . . . . ?
B4 B1 B2 B7 63.6(4) . . . . ?
B5 B1 B2 B7 0.2(5) . . . . ?
B6 B1 B2 B7 -37.4(3) . . . . ?
B3 B1 B2 B7 101.3(4) . . . . ?
N1 B1 B2 B6 -113.5(5) . . . . ?
B4 B1 B2 B6 101.0(3) . . . . ?
B5 B1 B2 B6 37.6(3) . . . . ?
B3 B1 B2 B6 138.6(3) . . . . ?
B1 B2 B3 B8 137.7(3) . . . . ?
B7 B2 B3 B8 37.2(3) . . . . ?
B6 B2 B3 B8 100.4(4) . . . . ?
B1 B2 B3 B4 37.1(3) . . . . ?
B8 B2 B3 B4 -100.5(4) . . . . ?
B7 B2 B3 B4 -63.3(4) . . . . ?
B6 B2 B3 B4 -0.1(4) . . . . ?
B8 B2 B3 B1 -137.7(3) . . . . ?
B7 B2 B3 B1 -100.4(4) . . . . ?
B6 B2 B3 B1 -37.2(3) . . . . ?
B1 B2 B3 B9 99.9(4) . . . . ?
B8 B2 B3 B9 -37.8(3) . . . . ?
B7 B2 B3 B9 -0.6(5) . . . . ?
B6 B2 B3 B9 62.7(4) . . . . ?
N1 B1 B3 B8 -153.9(4) . . . . ?
B2 B1 B3 B8 -37.6(3) . . . . ?
B4 B1 B3 B8 100.4(4) . . . . ?
B5 B1 B3 B8 63.8(4) . . . . ?
B6 B1 B3 B8 -0.1(4) . . . . ?
N1 B1 B3 B2 -116.3(4) . . . . ?
B4 B1 B3 B2 138.0(3) . . . . ?
B5 B1 B3 B2 101.4(3) . . . . ?
B6 B1 B3 B2 37.4(3) . . . . ?
N1 B1 B3 B4 105.7(4) . . . . ?
B2 B1 B3 B4 -138.0(3) . . . . ?
B5 B1 B3 B4 -36.6(3) . . . . ?
B6 B1 B3 B4 -100.6(3) . . . . ?
N1 B1 B3 B9 143.0(4) . . . . ?
B2 B1 B3 B9 -100.7(4) . . . . ?
B4 B1 B3 B9 37.3(3) . . . . ?
B5 B1 B3 B9 0.7(4) . . . . ?
B6 B1 B3 B9 -63.2(4) . . . . ?
N1 B1 B4 B10 147.1(3) . . . . ?
B2 B1 B4 B10 -64.0(4) . . . . ?
B5 B1 B4 B10 37.5(3) . . . . ?
B6 B1 B4 B10 0.1(5) . . . . ?
B3 B1 B4 B10 -101.6(4) . . . . ?
N1 B1 B4 B5 109.6(4) . . . . ?
B2 B1 B4 B5 -101.5(3) . . . . ?
B6 B1 B4 B5 -37.4(3) . . . . ?
B3 B1 B4 B5 -139.2(3) . . . . ?
N1 B1 B4 B9 -149.2(3) . . . . ?
B2 B1 B4 B9 -0.3(4) . . . . ?
B5 B1 B4 B9 101.2(3) . . . . ?
B6 B1 B4 B9 63.8(4) . . . . ?
B3 B1 B4 B9 -38.0(3) . . . . ?
N1 B1 B4 B3 -111.3(4) . . . . ?
B2 B1 B4 B3 37.6(3) . . . . ?
B5 B1 B4 B3 139.2(3) . . . . ?
B6 B1 B4 B3 101.7(4) . . . . ?
B8 B3 B4 B10 0.7(5) . . . . ?
B2 B3 B4 B10 63.8(4) . . . . ?
B1 B3 B4 B10 100.9(3) . . . . ?
B9 B3 B4 B10 -36.9(3) . . . . ?
B8 B3 B4 B5 -63.2(4) . . . . ?
B2 B3 B4 B5 -0.1(4) . . . . ?
B1 B3 B4 B5 37.0(3) . . . . ?
B9 B3 B4 B5 -100.8(4) . . . . ?
B8 B3 B4 B1 -100.1(4) . . . . ?
B2 B3 B4 B1 -37.1(3) . . . . ?
B9 B3 B4 B1 -137.8(3) . . . . ?
B8 B3 B4 B9 37.7(3) . . . . ?
B2 B3 B4 B9 100.7(4) . . . . ?
B1 B3 B4 B9 137.8(3) . . . . ?
B1 B4 B5 B10 138.2(3) . . . . ?
B9 B4 B5 B10 37.1(3) . . . . ?
B3 B4 B5 B10 101.2(4) . . . . ?
B10 B4 B5 B1 -138.2(3) . . . . ?
B9 B4 B5 B1 -101.1(4) . . . . ?
B3 B4 B5 B1 -36.9(3) . . . . ?
B10 B4 B5 B11 -37.8(3) . . . . ?
B1 B4 B5 B11 100.4(3) . . . . ?
B9 B4 B5 B11 -0.7(4) . . . . ?
B3 B4 B5 B11 63.5(4) . . . . ?
B10 B4 B5 B6 -101.0(4) . . . . ?
B1 B4 B5 B6 37.2(3) . . . . ?
B9 B4 B5 B6 -63.9(4) . . . . ?
B3 B4 B5 B6 0.3(4) . . . . ?
N1 B1 B5 B10 -143.3(4) . . . . ?
B2 B1 B5 B10 63.3(4) . . . . ?
B4 B1 B5 B10 -37.2(3) . . . . ?
B6 B1 B5 B10 101.1(4) . . . . ?
B3 B1 B5 B10 -0.5(4) . . . . ?
N1 B1 B5 B4 -106.1(4) . . . . ?
B2 B1 B5 B4 100.6(4) . . . . ?
B6 B1 B5 B4 138.3(3) . . . . ?
B3 B1 B5 B4 36.7(3) . . . . ?
N1 B1 B5 B11 153.4(4) . . . . ?
B2 B1 B5 B11 0.1(5) . . . . ?
B4 B1 B5 B11 -100.5(4) . . . . ?
B6 B1 B5 B11 37.8(3) . . . . ?
B3 B1 B5 B11 -63.7(4) . . . . ?
N1 B1 B5 B6 115.6(4) . . . . ?
B2 B1 B5 B6 -37.8(3) . . . . ?
B4 B1 B5 B6 -138.3(3) . . . . ?
B3 B1 B5 B6 -101.6(4) . . . . ?
N1 B1 B6 B7 152.6(4) . . . . ?
B2 B1 B6 B7 37.5(3) . . . . ?
B4 B1 B6 B7 -63.6(4) . . . . ?
B5 B1 B6 B7 -100.8(4) . . . . ?
B3 B1 B6 B7 0.2(4) . . . . ?
N1 B1 B6 B11 -144.4(4) . . . . ?
B2 B1 B6 B11 100.4(4) . . . . ?
B4 B1 B6 B11 -0.6(5) . . . . ?
B5 B1 B6 B11 -37.8(3) . . . . ?
B3 B1 B6 B11 63.2(4) . . . . ?
N1 B1 B6 B5 -106.6(4) . . . . ?
B2 B1 B6 B5 138.3(4) . . . . ?
B4 B1 B6 B5 37.2(3) . . . . ?
B3 B1 B6 B5 101.0(4) . . . . ?
N1 B1 B6 B2 115.2(4) . . . . ?
B4 B1 B6 B2 -101.0(4) . . . . ?
B5 B1 B6 B2 -138.3(4) . . . . ?
B3 B1 B6 B2 -37.2(3) . . . . ?
B10 B5 B6 B7 -0.3(4) . . . . ?
B4 B5 B6 B7 62.9(4) . . . . ?
B1 B5 B6 B7 100.1(4) . . . . ?
B11 B5 B6 B7 -37.4(3) . . . . ?
B10 B5 B6 B1 -100.3(3) . . . . ?
B4 B5 B6 B1 -37.2(3) . . . . ?
B11 B5 B6 B1 -137.5(4) . . . . ?
B10 B5 B6 B11 37.1(3) . . . . ?
B4 B5 B6 B11 100.3(4) . . . . ?
B1 B5 B6 B11 137.5(4) . . . . ?
B10 B5 B6 B2 -63.5(4) . . . . ?
B4 B5 B6 B2 -0.3(4) . . . . ?
B1 B5 B6 B2 36.8(3) . . . . ?
B11 B5 B6 B2 -100.6(4) . . . . ?
B1 B2 B6 B7 -137.9(4) . . . . ?
B8 B2 B6 B7 -37.1(3) . . . . ?
B3 B2 B6 B7 -100.6(4) . . . . ?
B8 B2 B6 B1 100.8(4) . . . . ?
B3 B2 B6 B1 37.3(3) . . . . ?
B7 B2 B6 B1 137.9(4) . . . . ?
B1 B2 B6 B11 -100.2(3) . . . . ?
B8 B2 B6 B11 0.6(4) . . . . ?
B3 B2 B6 B11 -62.8(4) . . . . ?
B7 B2 B6 B11 37.7(3) . . . . ?
B1 B2 B6 B5 -37.1(3) . . . . ?
B8 B2 B6 B5 63.7(4) . . . . ?
B3 B2 B6 B5 0.3(4) . . . . ?
B7 B2 B6 B5 100.8(4) . . . . ?
B1 B6 B7 B12 63.0(4) . . . . ?
B11 B6 B7 B12 -37.4(3) . . . . ?
B5 B6 B7 B12 0.0(5) . . . . ?
B2 B6 B7 B12 100.1(4) . . . . ?
B1 B6 B7 B11 100.5(4) . . . . ?
B5 B6 B7 B11 37.4(3) . . . . ?
B2 B6 B7 B11 137.6(4) . . . . ?
B1 B6 B7 B8 -0.2(5) . . . . ?
B11 B6 B7 B8 -100.6(4) . . . . ?
B5 B6 B7 B8 -63.2(4) . . . . ?
B2 B6 B7 B8 36.9(3) . . . . ?
B1 B6 B7 B2 -37.1(3) . . . . ?
B11 B6 B7 B2 -137.6(4) . . . . ?
B5 B6 B7 B2 -100.2(4) . . . . ?
B1 B2 B7 B12 -63.8(5) . . . . ?
B8 B2 B7 B12 37.2(4) . . . . ?
B3 B2 B7 B12 0.0(5) . . . . ?
B6 B2 B7 B12 -101.4(4) . . . . ?
B1 B2 B7 B11 -0.5(5) . . . . ?
B8 B2 B7 B11 100.5(4) . . . . ?
B3 B2 B7 B11 63.4(5) . . . . ?
B6 B2 B7 B11 -38.1(3) . . . . ?
B1 B2 B7 B6 37.6(3) . . . . ?
B8 B2 B7 B6 138.6(4) . . . . ?
B3 B2 B7 B6 101.5(4) . . . . ?
B1 B2 B7 B8 -101.0(4) . . . . ?
B3 B2 B7 B8 -37.1(4) . . . . ?
B6 B2 B7 B8 -138.6(4) . . . . ?
B2 B3 B8 B12 -100.6(4) . . . . ?
B4 B3 B8 B12 -0.6(5) . . . . ?
B1 B3 B8 B12 -63.3(5) . . . . ?
B9 B3 B8 B12 36.9(4) . . . . ?
B4 B3 B8 B2 100.1(4) . . . . ?
B1 B3 B8 B2 37.4(3) . . . . ?
B9 B3 B8 B2 137.6(4) . . . . ?
B2 B3 B8 B9 -137.6(4) . . . . ?
B4 B3 B8 B9 -37.5(3) . . . . ?
B1 B3 B8 B9 -100.2(4) . . . . ?
B2 B3 B8 B7 -37.3(4) . . . . ?
B4 B3 B8 B7 62.7(5) . . . . ?
B1 B3 B8 B7 0.0(5) . . . . ?
B9 B3 B8 B7 100.2(4) . . . . ?
B1 B2 B8 B12 63.2(4) . . . . ?
B3 B2 B8 B12 101.1(4) . . . . ?
B7 B2 B8 B12 -37.3(3) . . . . ?
B6 B2 B8 B12 -0.4(5) . . . . ?
B1 B2 B8 B3 -38.0(3) . . . . ?
B7 B2 B8 B3 -138.5(4) . . . . ?
B6 B2 B8 B3 -101.6(4) . . . . ?
B1 B2 B8 B9 0.1(5) . . . . ?
B3 B2 B8 B9 38.1(3) . . . . ?
B7 B2 B8 B9 -100.3(4) . . . . ?
B6 B2 B8 B9 -63.5(4) . . . . ?
B1 B2 B8 B7 100.5(4) . . . . ?
B3 B2 B8 B7 138.5(4) . . . . ?
B6 B2 B8 B7 36.9(3) . . . . ?
B11 B7 B8 B12 37.1(3) . . . . ?
B6 B7 B8 B12 100.9(4) . . . . ?
B2 B7 B8 B12 138.1(4) . . . . ?
B12 B7 B8 B3 -100.8(4) . . . . ?
B11 B7 B8 B3 -63.7(4) . . . . ?
B6 B7 B8 B3 0.1(5) . . . . ?
B2 B7 B8 B3 37.3(3) . . . . ?
B12 B7 B8 B2 -138.1(4) . . . . ?
B11 B7 B8 B2 -101.0(4) . . . . ?
B6 B7 B8 B2 -37.2(3) . . . . ?
B12 B7 B8 B9 -36.9(3) . . . . ?
B11 B7 B8 B9 0.2(4) . . . . ?
B6 B7 B8 B9 64.0(4) . . . . ?
B2 B7 B8 B9 101.2(4) . . . . ?
B10 B4 B9 B12 38.4(3) . . . . ?
B5 B4 B9 B12 1.3(5) . . . . ?
B1 B4 B9 B12 -62.7(4) . . . . ?
B3 B4 B9 B12 -100.6(4) . . . . ?
B5 B4 B9 B10 -37.1(3) . . . . ?
B1 B4 B9 B10 -101.1(3) . . . . ?
B3 B4 B9 B10 -139.0(4) . . . . ?
B10 B4 B9 B8 101.5(4) . . . . ?
B5 B4 B9 B8 64.4(4) . . . . ?
B1 B4 B9 B8 0.4(4) . . . . ?
B3 B4 B9 B8 -37.5(3) . . . . ?
B10 B4 B9 B3 139.0(4) . . . . ?
B5 B4 B9 B3 101.9(4) . . . . ?
B1 B4 B9 B3 37.9(3) . . . . ?
B3 B8 B9 B12 138.6(4) . . . . ?
B2 B8 B9 B12 100.6(4) . . . . ?
B7 B8 B9 B12 37.0(3) . . . . ?
B12 B8 B9 B10 -37.8(3) . . . . ?
B3 B8 B9 B10 100.8(4) . . . . ?
B2 B8 B9 B10 62.7(4) . . . . ?
B7 B8 B9 B10 -0.9(4) . . . . ?
B12 B8 B9 B4 -100.9(4) . . . . ?
B3 B8 B9 B4 37.7(3) . . . . ?
B2 B8 B9 B4 -0.3(5) . . . . ?
B7 B8 B9 B4 -63.9(4) . . . . ?
B12 B8 B9 B3 -138.6(4) . . . . ?
B2 B8 B9 B3 -38.0(3) . . . . ?
B7 B8 B9 B3 -101.6(4) . . . . ?
B8 B3 B9 B12 -36.9(4) . . . . ?
B2 B3 B9 B12 0.9(5) . . . . ?
B4 B3 B9 B12 100.8(4) . . . . ?
B1 B3 B9 B12 63.5(4) . . . . ?
B8 B3 B9 B10 -101.1(4) . . . . ?
B2 B3 B9 B10 -63.3(4) . . . . ?
B4 B3 B9 B10 36.6(3) . . . . ?
B1 B3 B9 B10 -0.7(4) . . . . ?
B8 B3 B9 B4 -137.7(4) . . . . ?
B2 B3 B9 B4 -99.9(4) . . . . ?
B1 B3 B9 B4 -37.3(3) . . . . ?
B2 B3 B9 B8 37.8(4) . . . . ?
B4 B3 B9 B8 137.7(4) . . . . ?
B1 B3 B9 B8 100.4(4) . . . . ?
B1 B4 B10 B5 -37.7(3) . . . . ?
B9 B4 B10 B5 -138.7(4) . . . . ?
B3 B4 B10 B5 -101.6(4) . . . . ?
B5 B4 B10 B9 138.7(4) . . . . ?
B1 B4 B10 B9 101.0(4) . . . . ?
B3 B4 B10 B9 37.1(4) . . . . ?
B5 B4 B10 B11 38.1(3) . . . . ?
B1 B4 B10 B11 0.4(5) . . . . ?
B9 B4 B10 B11 -100.6(4) . . . . ?
B3 B4 B10 B11 -63.5(4) . . . . ?
B5 B4 B10 B12 101.0(4) . . . . ?
B1 B4 B10 B12 63.4(4) . . . . ?
B9 B4 B10 B12 -37.7(3) . . . . ?
B3 B4 B10 B12 -0.6(5) . . . . ?
B1 B5 B10 B4 37.2(3) . . . . ?
B11 B5 B10 B4 137.6(4) . . . . ?
B6 B5 B10 B4 100.5(3) . . . . ?
B4 B5 B10 B9 -37.2(3) . . . . ?
B1 B5 B10 B9 0.1(4) . . . . ?
B11 B5 B10 B9 100.4(4) . . . . ?
B6 B5 B10 B9 63.3(4) . . . . ?
B4 B5 B10 B11 -137.6(4) . . . . ?
B1 B5 B10 B11 -100.4(4) . . . . ?
B6 B5 B10 B11 -37.1(3) . . . . ?
B4 B5 B10 B12 -100.1(4) . . . . ?
B1 B5 B10 B12 -62.8(4) . . . . ?
B11 B5 B10 B12 37.5(3) . . . . ?
B6 B5 B10 B12 0.4(4) . . . . ?
B12 B9 B10 B4 -137.3(4) . . . . ?
B8 B9 B10 B4 -99.9(4) . . . . ?
B3 B9 B10 B4 -36.8(3) . . . . ?
B12 B9 B10 B5 -100.2(4) . . . . ?
B4 B9 B10 B5 37.2(3) . . . . ?
B8 B9 B10 B5 -62.7(4) . . . . ?
B3 B9 B10 B5 0.4(4) . . . . ?
B12 B9 B10 B11 -36.2(3) . . . . ?
B4 B9 B10 B11 101.1(4) . . . . ?
B8 B9 B10 B11 1.2(4) . . . . ?
B3 B9 B10 B11 64.3(4) . . . . ?
B4 B9 B10 B12 137.3(4) . . . . ?
B8 B9 B10 B12 37.4(3) . . . . ?
B3 B9 B10 B12 100.6(4) . . . . ?
B6 B7 B11 B12 -138.2(3) . . . . ?
B8 B7 B11 B12 -37.0(3) . . . . ?
B2 B7 B11 B12 -100.0(4) . . . . ?
B12 B7 B11 B10 37.5(3) . . . . ?
B6 B7 B11 B10 -100.7(3) . . . . ?
B8 B7 B11 B10 0.5(4) . . . . ?
B2 B7 B11 B10 -62.5(4) . . . . ?
B12 B7 B11 B5 100.6(3) . . . . ?
B6 B7 B11 B5 -37.6(3) . . . . ?
B8 B7 B11 B5 63.6(4) . . . . ?
B2 B7 B11 B5 0.5(5) . . . . ?
B12 B7 B11 B6 138.2(3) . . . . ?
B8 B7 B11 B6 101.2(4) . . . . ?
B2 B7 B11 B6 38.1(3) . . . . ?
B4 B10 B11 B12 99.8(4) . . . . ?
B5 B10 B11 B12 137.8(3) . . . . ?
B9 B10 B11 B12 36.2(3) . . . . ?
B4 B10 B11 B7 62.6(4) . . . . ?
B5 B10 B11 B7 100.5(4) . . . . ?
B9 B10 B11 B7 -1.1(4) . . . . ?
B12 B10 B11 B7 -37.2(3) . . . . ?
B4 B10 B11 B5 -38.0(3) . . . . ?
B9 B10 B11 B5 -101.6(3) . . . . ?
B12 B10 B11 B5 -137.8(3) . . . . ?
B4 B10 B11 B6 -0.8(5) . . . . ?
B5 B10 B11 B6 37.2(3) . . . . ?
B9 B10 B11 B6 -64.4(4) . . . . ?
B12 B10 B11 B6 -100.6(4) . . . . ?
B10 B5 B11 B12 -37.9(3) . . . . ?
B4 B5 B11 B12 -0.2(4) . . . . ?
B1 B5 B11 B12 62.8(4) . . . . ?
B6 B5 B11 B12 100.6(4) . . . . ?
B10 B5 B11 B7 -101.1(4) . . . . ?
B4 B5 B11 B7 -63.4(4) . . . . ?
B1 B5 B11 B7 -0.4(5) . . . . ?
B6 B5 B11 B7 37.5(3) . . . . ?
B4 B5 B11 B10 37.7(3) . . . . ?
B1 B5 B11 B10 100.7(4) . . . . ?
B6 B5 B11 B10 138.5(4) . . . . ?
B10 B5 B11 B6 -138.5(4) . . . . ?
B4 B5 B11 B6 -100.8(4) . . . . ?
B1 B5 B11 B6 -37.8(3) . . . . ?
B7 B6 B11 B12 37.2(3) . . . . ?
B1 B6 B11 B12 -63.0(4) . . . . ?
B5 B6 B11 B12 -100.8(3) . . . . ?
B2 B6 B11 B12 -0.6(4) . . . . ?
B1 B6 B11 B7 -100.2(4) . . . . ?
B5 B6 B11 B7 -138.0(4) . . . . ?
B2 B6 B11 B7 -37.8(3) . . . . ?
B7 B6 B11 B10 101.1(4) . . . . ?
B1 B6 B11 B10 0.9(5) . . . . ?
B5 B6 B11 B10 -36.9(3) . . . . ?
B2 B6 B11 B10 63.3(4) . . . . ?
B7 B6 B11 B5 138.0(4) . . . . ?
B1 B6 B11 B5 37.8(3) . . . . ?
B2 B6 B11 B5 100.2(4) . . . . ?
B10 B9 B12 B8 138.1(4) . . . . ?
B4 B9 B12 B8 100.2(4) . . . . ?
B3 B9 B12 B8 36.8(4) . . . . ?
B10 B9 B12 B7 100.5(4) . . . . ?
B4 B9 B12 B7 62.5(5) . . . . ?
B8 B9 B12 B7 -37.7(4) . . . . ?
B3 B9 B12 B7 -0.8(5) . . . . ?
B10 B9 B12 B11 36.5(3) . . . . ?
B4 B9 B12 B11 -1.4(5) . . . . ?
B8 B9 B12 B11 -101.6(4) . . . . ?
B3 B9 B12 B11 -64.8(4) . . . . ?
B4 B9 B12 B10 -37.9(3) . . . . ?
B8 B9 B12 B10 -138.1(4) . . . . ?
B3 B9 B12 B10 -101.3(4) . . . . ?
B3 B8 B12 B9 -37.3(4) . . . . ?
B2 B8 B12 B9 -100.9(4) . . . . ?
B7 B8 B12 B9 -138.5(4) . . . . ?
B3 B8 B12 B7 101.2(4) . . . . ?
B2 B8 B12 B7 37.5(3) . . . . ?
B9 B8 B12 B7 138.5(4) . . . . ?
B3 B8 B12 B11 63.8(5) . . . . ?
B2 B8 B12 B11 0.1(5) . . . . ?
B9 B8 B12 B11 101.0(4) . . . . ?
B7 B8 B12 B11 -37.4(3) . . . . ?
B3 B8 B12 B10 0.2(5) . . . . ?
B2 B8 B12 B10 -63.5(5) . . . . ?
B9 B8 B12 B10 37.5(3) . . . . ?
B7 B8 B12 B10 -101.0(4) . . . . ?
B11 B7 B12 B9 -100.8(4) . . . . ?
B6 B7 B12 B9 -63.2(5) . . . . ?
B8 B7 B12 B9 37.7(3) . . . . ?
B2 B7 B12 B9 0.5(5) . . . . ?
B11 B7 B12 B8 -138.5(3) . . . . ?
B6 B7 B12 B8 -100.9(4) . . . . ?
B2 B7 B12 B8 -37.2(3) . . . . ?
B6 B7 B12 B11 37.6(3) . . . . ?
B8 B7 B12 B11 138.5(3) . . . . ?
B2 B7 B12 B11 101.3(4) . . . . ?
B11 B7 B12 B10 -37.3(3) . . . . ?
B6 B7 B12 B10 0.3(4) . . . . ?
B8 B7 B12 B10 101.2(3) . . . . ?
B2 B7 B12 B10 64.1(4) . . . . ?
B7 B11 B12 B9 101.8(4) . . . . ?
B10 B11 B12 B9 -36.5(3) . . . . ?
B5 B11 B12 B9 1.0(4) . . . . ?
B6 B11 B12 B9 64.6(4) . . . . ?
B7 B11 B12 B8 37.6(3) . . . . ?
B10 B11 B12 B8 -100.8(4) . . . . ?
B5 B11 B12 B8 -63.3(4) . . . . ?
B6 B11 B12 B8 0.3(4) . . . . ?
B10 B11 B12 B7 -138.3(3) . . . . ?
B5 B11 B12 B7 -100.8(3) . . . . ?
B6 B11 B12 B7 -37.3(3) . . . . ?
B7 B11 B12 B10 138.3(3) . . . . ?
B5 B11 B12 B10 37.5(3) . . . . ?
B6 B11 B12 B10 101.1(3) . . . . ?
B4 B10 B12 B9 38.0(3) . . . . ?
B5 B10 B12 B9 101.4(4) . . . . ?
B11 B10 B12 B9 139.3(4) . . . . ?
B4 B10 B12 B8 0.3(5) . . . . ?
B5 B10 B12 B8 63.7(4) . . . . ?
B9 B10 B12 B8 -37.8(4) . . . . ?
B11 B10 B12 B8 101.5(4) . . . . ?
B4 B10 B12 B7 -63.9(4) . . . . ?
B5 B10 B12 B7 -0.5(4) . . . . ?
B9 B10 B12 B7 -101.9(4) . . . . ?
B11 B10 B12 B7 37.4(3) . . . . ?
B4 B10 B12 B11 -101.3(4) . . . . ?
B5 B10 B12 B11 -37.9(3) . . . . ?
B9 B10 B12 B11 -139.3(4) . . . . ?
B1A N1A C1A N2A 1.1(7) . . . . ?
B1A N1A C1A C2A -178.7(5) . . . . ?
C3A N2A C1A N1A -174.9(4) . . . . ?
C3A N2A C1A C2A 4.9(7) . . . . ?
C1A N2A C3A C4A 121.2(5) . . . . ?
C1A N2A C3A C8A -59.7(6) . . . . ?
C8A C3A C4A C5A -0.3(8) . . . . ?
N2A C3A C4A C5A 178.8(5) . . . . ?
C3A C4A C5A C6A 1.1(9) . . . . ?
C4A C5A C6A C7A -1.2(9) . . . . ?
C5A C6A C7A C8A 0.6(8) . . . . ?
C4A C3A C8A C7A -0.3(6) . . . . ?
N2A C3A C8A C7A -179.4(4) . . . . ?
C6A C7A C8A C3A 0.2(7) . . . . ?
C1A N1A B1A B4A -108.0(5) . . . . ?
C1A N1A B1A B5A -33.8(6) . . . . ?
C1A N1A B1A B6A 40.9(7) . . . . ?
C1A N1A B1A B3A -178.1(4) . . . . ?
C1A N1A B1A B2A 112.7(5) . . . . ?
N1A B1A B2A B7A -152.3(3) . . . . ?
B4A B1A B2A B7A 63.8(4) . . . . ?
B5A B1A B2A B7A -0.5(4) . . . . ?
B6A B1A B2A B7A -37.8(3) . . . . ?
B3A B1A B2A B7A 101.2(3) . . . . ?
N1A B1A B2A B8A 143.4(3) . . . . ?
B4A B1A B2A B8A -0.6(4) . . . . ?
B5A B1A B2A B8A -64.9(4) . . . . ?
B6A B1A B2A B8A -102.2(3) . . . . ?
B3A B1A B2A B8A 36.9(3) . . . . ?
N1A B1A B2A B3A 106.5(4) . . . . ?
B4A B1A B2A B3A -37.5(3) . . . . ?
B5A B1A B2A B3A -101.8(3) . . . . ?
B6A B1A B2A B3A -139.1(3) . . . . ?
N1A B1A B2A B6A -114.5(4) . . . . ?
B4A B1A B2A B6A 101.6(3) . . . . ?
B5A B1A B2A B6A 37.3(3) . . . . ?
B3A B1A B2A B6A 139.1(3) . . . . ?
N1A B1A B3A B9A 149.4(3) . . . . ?
B4A B1A B3A B9A 37.2(3) . . . . ?
B5A B1A B3A B9A -0.3(4) . . . . ?
B6A B1A B3A B9A -64.2(4) . . . . ?
B2A B1A B3A B9A -101.1(3) . . . . ?
N1A B1A B3A B8A -146.4(3) . . . . ?
B4A B1A B3A B8A 101.4(3) . . . . ?
B5A B1A B3A B8A 63.9(4) . . . . ?
B6A B1A B3A B8A 0.0(4) . . . . ?
B2A B1A B3A B8A -36.9(3) . . . . ?
N1A B1A B3A B4A 112.2(4) . . . . ?
B5A B1A B3A B4A -37.5(3) . . . . ?
B6A B1A B3A B4A -101.4(3) . . . . ?
B2A B1A B3A B4A -138.3(3) . . . . ?
N1A B1A B3A B2A -109.5(4) . . . . ?
B4A B1A B3A B2A 138.3(3) . . . . ?
B5A B1A B3A B2A 100.8(3) . . . . ?
B6A B1A B3A B2A 37.0(3) . . . . ?
B7A B2A B3A B9A -0.5(5) . . . . ?
B8A B2A B3A B9A -38.5(3) . . . . ?
B1A B2A B3A B9A 100.2(3) . . . . ?
B6A B2A B3A B9A 63.6(4) . . . . ?
B7A B2A B3A B8A 38.0(3) . . . . ?
B1A B2A B3A B8A 138.7(3) . . . . ?
B6A B2A B3A B8A 102.1(4) . . . . ?
B7A B2A B3A B1A -100.7(3) . . . . ?
B8A B2A B3A B1A -138.7(3) . . . . ?
B6A B2A B3A B1A -36.6(3) . . . . ?
B7A B2A B3A B4A -63.6(4) . . . . ?
B8A B2A B3A B4A -101.6(3) . . . . ?
B1A B2A B3A B4A 37.1(3) . . . . ?
B6A B2A B3A B4A 0.4(4) . . . . ?
N1A B1A B4A B9A -142.8(3) . . . . ?
B5A B1A B4A B9A 101.3(3) . . . . ?
B6A B1A B4A B9A 64.2(4) . . . . ?
B3A B1A B4A B9A -37.3(3) . . . . ?
B2A B1A B4A B9A 0.2(4) . . . . ?
N1A B1A B4A B3A -105.5(4) . . . . ?
B5A B1A B4A B3A 138.6(3) . . . . ?
B6A B1A B4A B3A 101.4(3) . . . . ?
B2A B1A B4A B3A 37.4(3) . . . . ?
N1A B1A B4A B10A 153.5(3) . . . . ?
B5A B1A B4A B10A 37.6(3) . . . . ?
B6A B1A B4A B10A 0.4(4) . . . . ?
B3A B1A B4A B10A -101.0(3) . . . . ?
B2A B1A B4A B10A -63.5(4) . . . . ?
N1A B1A B4A B5A 115.9(4) . . . . ?
B6A B1A B4A B5A -37.2(3) . . . . ?
B3A B1A B4A B5A -138.6(3) . . . . ?
B2A B1A B4A B5A -101.2(3) . . . . ?
B8A B3A B4A B9A 37.6(3) . . . . ?
B1A B3A B4A B9A 138.1(3) . . . . ?
B2A B3A B4A B9A 101.0(3) . . . . ?
B9A B3A B4A B1A -138.1(3) . . . . ?
B8A B3A B4A B1A -100.5(3) . . . . ?
B2A B3A B4A B1A -37.2(3) . . . . ?
B9A B3A B4A B10A -37.5(3) . . . . ?
B8A B3A B4A B10A 0.1(4) . . . . ?
B1A B3A B4A B10A 100.7(3) . . . . ?
B2A B3A B4A B10A 63.5(4) . . . . ?
B9A B3A B4A B5A -101.2(3) . . . . ?
B8A B3A B4A B5A -63.6(4) . . . . ?
B1A B3A B4A B5A 37.0(3) . . . . ?
B2A B3A B4A B5A -0.2(4) . . . . ?
N1A B1A B5A B6A 112.1(4) . . . . ?
B4A B1A B5A B6A -138.7(3) . . . . ?
B3A B1A B5A B6A -101.3(3) . . . . ?
B2A B1A B5A B6A -37.4(3) . . . . ?
N1A B1A B5A B11A 150.2(3) . . . . ?
B4A B1A B5A B11A -100.6(3) . . . . ?
B6A B1A B5A B11A 38.1(3) . . . . ?
B3A B1A B5A B11A -63.2(4) . . . . ?
B2A B1A B5A B11A 0.7(4) . . . . ?
N1A B1A B5A B4A -109.3(4) . . . . ?
B6A B1A B5A B4A 138.7(3) . . . . ?
B3A B1A B5A B4A 37.4(3) . . . . ?
B2A B1A B5A B4A 101.3(3) . . . . ?
N1A B1A B5A B10A -146.5(4) . . . . ?
B4A B1A B5A B10A -37.2(3) . . . . ?
B6A B1A B5A B10A 101.5(3) . . . . ?
B3A B1A B5A B10A 0.2(4) . . . . ?
B2A B1A B5A B10A 64.1(4) . . . . ?
B9A B4A B5A B1A -100.3(3) . . . . ?
B3A B4A B5A B1A -37.1(3) . . . . ?
B10A B4A B5A B1A -138.0(3) . . . . ?
B9A B4A B5A B6A -63.4(4) . . . . ?
B1A B4A B5A B6A 36.9(3) . . . . ?
B3A B4A B5A B6A -0.1(4) . . . . ?
B10A B4A B5A B6A -101.0(4) . . . . ?
B9A B4A B5A B11A 0.1(4) . . . . ?
B1A B4A B5A B11A 100.4(3) . . . . ?
B3A B4A B5A B11A 63.3(4) . . . . ?
B10A B4A B5A B11A -37.6(3) . . . . ?
B9A B4A B5A B10A 37.6(3) . . . . ?
B1A B4A B5A B10A 138.0(3) . . . . ?
B3A B4A B5A B10A 100.9(3) . . . . ?
N1A B1A B6A B5A -114.8(4) . . . . ?
B4A B1A B6A B5A 37.5(3) . . . . ?
B3A B1A B6A B5A 101.5(3) . . . . ?
B2A B1A B6A B5A 138.4(3) . . . . ?
N1A B1A B6A B11A -152.9(4) . . . . ?
B4A B1A B6A B11A -0.6(4) . . . . ?
B5A B1A B6A B11A -38.1(3) . . . . ?
B3A B1A B6A B11A 63.4(4) . . . . ?
B2A B1A B6A B11A 100.3(4) . . . . ?
N1A B1A B6A B2A 106.8(4) . . . . ?
B4A B1A B6A B2A -101.0(3) . . . . ?
B5A B1A B6A B2A -138.4(3) . . . . ?
B3A B1A B6A B2A -36.9(3) . . . . ?
N1A B1A B6A B7A 143.8(4) . . . . ?
B4A B1A B6A B7A -63.9(4) . . . . ?
B5A B1A B6A B7A -101.4(3) . . . . ?
B3A B1A B6A B7A 0.1(4) . . . . ?
B2A B1A B6A B7A 37.0(3) . . . . ?
B11A B5A B6A B1A -137.3(3) . . . . ?
B4A B5A B6A B1A -36.7(3) . . . . ?
B10A B5A B6A B1A -99.8(3) . . . . ?
B1A B5A B6A B11A 137.3(3) . . . . ?
B4A B5A B6A B11A 100.5(3) . . . . ?
B10A B5A B6A B11A 37.5(3) . . . . ?
B1A B5A B6A B2A 37.1(3) . . . . ?
B11A B5A B6A B2A -100.1(3) . . . . ?
B4A B5A B6A B2A 0.4(4) . . . . ?
B10A B5A B6A B2A -62.7(4) . . . . ?
B1A B5A B6A B7A 99.8(3) . . . . ?
B11A B5A B6A B7A -37.5(3) . . . . ?
B4A B5A B6A B7A 63.0(4) . . . . ?
B10A B5A B6A B7A 0.0(4) . . . . ?
B7A B2A B6A B1A 138.0(3) . . . . ?
B8A B2A B6A B1A 100.3(3) . . . . ?
B3A B2A B6A B1A 36.7(3) . . . . ?
B7A B2A B6A B5A 100.8(3) . . . . ?
B8A B2A B6A B5A 63.1(4) . . . . ?
B1A B2A B6A B5A -37.2(3) . . . . ?
B3A B2A B6A B5A -0.5(4) . . . . ?
B7A B2A B6A B11A 37.4(3) . . . . ?
B8A B2A B6A B11A -0.3(4) . . . . ?
B1A B2A B6A B11A -100.6(3) . . . . ?
B3A B2A B6A B11A -63.9(4) . . . . ?
B8A B2A B6A B7A -37.7(3) . . . . ?
B1A B2A B6A B7A -138.0(3) . . . . ?
B3A B2A B6A B7A -101.3(4) . . . . ?
B8A B2A B7A B12A 37.5(3) . . . . ?
B1A B2A B7A B12A -63.5(4) . . . . ?
B3A B2A B7A B12A -0.1(5) . . . . ?
B6A B2A B7A B12A -101.1(4) . . . . ?
B8A B2A B7A B6A 138.6(3) . . . . ?
B1A B2A B7A B6A 37.5(3) . . . . ?
B3A B2A B7A B6A 101.0(3) . . . . ?
B8A B2A B7A B11A 101.2(4) . . . . ?
B1A B2A B7A B11A 0.1(4) . . . . ?
B3A B2A B7A B11A 63.6(4) . . . . ?
B6A B2A B7A B11A -37.4(3) . . . . ?
B1A B2A B7A B8A -101.0(3) . . . . ?
B3A B2A B7A B8A -37.6(3) . . . . ?
B6A B2A B7A B8A -138.6(3) . . . . ?
B1A B6A B7A B2A -37.3(3) . . . . ?
B5A B6A B7A B2A -100.6(3) . . . . ?
B11A B6A B7A B2A -138.1(3) . . . . ?
B1A B6A B7A B12A 63.4(4) . . . . ?
B5A B6A B7A B12A 0.1(4) . . . . ?
B11A B6A B7A B12A -37.3(3) . . . . ?
B2A B6A B7A B12A 100.7(3) . . . . ?
B1A B6A B7A B11A 100.7(3) . . . . ?
B5A B6A B7A B11A 37.5(3) . . . . ?
B2A B6A B7A B11A 138.1(3) . . . . ?
B1A B6A B7A B8A -0.2(4) . . . . ?
B5A B6A B7A B8A -63.5(4) . . . . ?
B11A B6A B7A B8A -101.0(4) . . . . ?
B2A B6A B7A B8A 37.1(3) . . . . ?
B7A B2A B8A B3A -138.0(4) . . . . ?
B1A B2A B8A B3A -36.9(3) . . . . ?
B6A B2A B8A B3A -100.5(3) . . . . ?
B7A B2A B8A B12A -37.0(3) . . . . ?
B1A B2A B8A B12A 64.0(4) . . . . ?
B3A B2A B8A B12A 101.0(3) . . . . ?
B6A B2A B8A B12A 0.5(4) . . . . ?
B1A B2A B8A B7A 101.1(3) . . . . ?
B3A B2A B8A B7A 138.0(4) . . . . ?
B6A B2A B8A B7A 37.6(3) . . . . ?
B7A B2A B8A B9A -100.4(3) . . . . ?
B1A B2A B8A B9A 0.7(4) . . . . ?
B3A B2A B8A B9A 37.7(3) . . . . ?
B6A B2A B8A B9A -62.8(4) . . . . ?
B9A B3A B8A B2A 137.3(3) . . . . ?
B1A B3A B8A B2A 36.9(3) . . . . ?
B4A B3A B8A B2A 100.2(3) . . . . ?
B9A B3A B8A B12A 37.4(3) . . . . ?
B1A B3A B8A B12A -63.0(4) . . . . ?
B4A B3A B8A B12A 0.3(4) . . . . ?
B2A B3A B8A B12A -99.9(4) . . . . ?
B9A B3A B8A B7A 100.2(4) . . . . ?
B1A B3A B8A B7A -0.2(4) . . . . ?
B4A B3A B8A B7A 63.1(4) . . . . ?
B2A B3A B8A B7A -37.1(3) . . . . ?
B1A B3A B8A B9A -100.4(3) . . . . ?
B4A B3A B8A B9A -37.2(3) . . . . ?
B2A B3A B8A B9A -137.3(3) . . . . ?
B12A B7A B8A B2A -138.1(4) . . . . ?
B6A B7A B8A B2A -37.3(3) . . . . ?
B11A B7A B8A B2A -100.6(3) . . . . ?
B2A B7A B8A B3A 37.5(3) . . . . ?
B12A B7A B8A B3A -100.5(4) . . . . ?
B6A B7A B8A B3A 0.3(4) . . . . ?
B11A B7A B8A B3A -63.1(4) . . . . ?
B2A B7A B8A B12A 138.1(4) . . . . ?
B6A B7A B8A B12A 100.8(4) . . . . ?
B11A B7A B8A B12A 37.5(3) . . . . ?
B2A B7A B8A B9A 100.1(3) . . . . ?
B12A B7A B8A B9A -37.9(3) . . . . ?
B6A B7A B8A B9A 62.9(4) . . . . ?
B11A B7A B8A B9A -0.5(4) . . . . ?
B8A B3A B9A B4A -138.5(3) . . . . ?
B1A B3A B9A B4A -37.2(3) . . . . ?
B2A B3A B9A B4A -100.4(3) . . . . ?
B8A B3A B9A B10A -101.0(3) . . . . ?
B1A B3A B9A B10A 0.4(4) . . . . ?
B4A B3A B9A B10A 37.5(3) . . . . ?
B2A B3A B9A B10A -62.9(4) . . . . ?
B1A B3A B9A B8A 101.3(3) . . . . ?
B4A B3A B9A B8A 138.5(3) . . . . ?
B2A B3A B9A B8A 38.1(3) . . . . ?
B8A B3A B9A B12A -37.2(3) . . . . ?
B1A B3A B9A B12A 64.1(4) . . . . ?
B4A B3A B9A B12A 101.3(4) . . . . ?
B2A B3A B9A B12A 0.8(5) . . . . ?
B1A B4A B9A B3A 37.4(3) . . . . ?
B10A B4A B9A B3A 138.3(3) . . . . ?
B5A B4A B9A B3A 100.7(3) . . . . ?
B1A B4A B9A B10A -100.9(3) . . . . ?
B3A B4A B9A B10A -138.3(3) . . . . ?
B5A B4A B9A B10A -37.6(3) . . . . ?
B1A B4A B9A B8A 0.3(4) . . . . ?
B3A B4A B9A B8A -37.1(3) . . . . ?
B10A B4A B9A B8A 101.2(3) . . . . ?
B5A B4A B9A B8A 63.6(4) . . . . ?
B1A B4A B9A B12A -63.0(4) . . . . ?
B3A B4A B9A B12A -100.4(3) . . . . ?
B10A B4A B9A B12A 37.9(3) . . . . ?
B5A B4A B9A B12A 0.3(4) . . . . ?
B2A B8A B9A B3A -38.0(3) . . . . ?
B12A B8A B9A B3A -138.1(4) . . . . ?
B7A B8A B9A B3A -100.5(4) . . . . ?
B2A B8A B9A B4A -0.6(4) . . . . ?
B3A B8A B9A B4A 37.4(3) . . . . ?
B12A B8A B9A B4A -100.7(3) . . . . ?
B7A B8A B9A B4A -63.1(4) . . . . ?
B2A B8A B9A B10A 63.2(4) . . . . ?
B3A B8A B9A B10A 101.2(4) . . . . ?
B12A B8A B9A B10A -36.9(3) . . . . ?
B7A B8A B9A B10A 0.7(4) . . . . ?
B2A B8A B9A B12A 100.1(4) . . . . ?
B3A B8A B9A B12A 138.1(4) . . . . ?
B7A B8A B9A B12A 37.6(3) . . . . ?
B1A B4A B10A B9A 100.7(3) . . . . ?
B3A B4A B10A B9A 37.2(3) . . . . ?
B5A B4A B10A B9A 138.2(3) . . . . ?
B9A B4A B10A B11A -100.8(4) . . . . ?
B1A B4A B10A B11A -0.1(5) . . . . ?
B3A B4A B10A B11A -63.6(4) . . . . ?
B5A B4A B10A B11A 37.4(3) . . . . ?
B9A B4A B10A B5A -138.2(3) . . . . ?
B1A B4A B10A B5A -37.5(3) . . . . ?
B3A B4A B10A B5A -100.9(3) . . . . ?
B9A B4A B10A B12A -37.7(3) . . . . ?
B1A B4A B10A B12A 63.0(4) . . . . ?
B3A B4A B10A B12A -0.5(4) . . . . ?
B5A B4A B10A B12A 100.4(4) . . . . ?
B3A B9A B10A B4A -37.7(3) . . . . ?
B8A B9A B10A B4A -101.1(3) . . . . ?
B12A B9A B10A B4A -137.8(3) . . . . ?
B3A B9A B10A B11A 62.7(4) . . . . ?
B4A B9A B10A B11A 100.4(4) . . . . ?
B8A B9A B10A B11A -0.7(4) . . . . ?
B12A B9A B10A B11A -37.4(3) . . . . ?
B3A B9A B10A B5A -0.3(4) . . . . ?
B4A B9A B10A B5A 37.4(3) . . . . ?
B8A B9A B10A B5A -63.7(4) . . . . ?
B12A B9A B10A B5A -100.4(3) . . . . ?
B3A B9A B10A B12A 100.1(3) . . . . ?
B4A B9A B10A B12A 137.8(3) . . . . ?
B8A B9A B10A B12A 36.7(3) . . . . ?
B1A B5A B10A B4A 37.2(3) . . . . ?
B6A B5A B10A B4A 100.5(3) . . . . ?
B11A B5A B10A B4A 137.9(4) . . . . ?
B1A B5A B10A B9A 0.1(4) . . . . ?
B6A B5A B10A B9A 63.4(4) . . . . ?
B11A B5A B10A B9A 100.8(4) . . . . ?
B4A B5A B10A B9A -37.1(3) . . . . ?
B1A B5A B10A B11A -100.8(3) . . . . ?
B6A B5A B10A B11A -37.5(3) . . . . ?
B4A B5A B10A B11A -137.9(4) . . . . ?
B1A B5A B10A B12A -63.4(4) . . . . ?
B6A B5A B10A B12A -0.1(4) . . . . ?
B11A B5A B10A B12A 37.4(3) . . . . ?
B4A B5A B10A B12A -100.6(3) . . . . ?
B1A B5A B11A B6A -38.1(3) . . . . ?
B4A B5A B11A B6A -100.9(3) . . . . ?
B10A B5A B11A B6A -138.2(3) . . . . ?
B1A B5A B11A B7A -0.6(4) . . . . ?
B6A B5A B11A B7A 37.4(3) . . . . ?
B4A B5A B11A B7A -63.4(4) . . . . ?
B10A B5A B11A B7A -100.8(4) . . . . ?
B1A B5A B11A B12A 62.4(4) . . . . ?
B6A B5A B11A B12A 100.5(4) . . . . ?
B4A B5A B11A B12A -0.4(4) . . . . ?
B10A B5A B11A B12A -37.7(3) . . . . ?
B1A B5A B11A B10A 100.1(3) . . . . ?
B6A B5A B11A B10A 138.2(3) . . . . ?
B4A B5A B11A B10A 37.4(3) . . . . ?
B1A B6A B11A B5A 38.0(3) . . . . ?
B2A B6A B11A B5A 101.1(3) . . . . ?
B7A B6A B11A B5A 138.1(3) . . . . ?
B1A B6A B11A B7A -100.1(3) . . . . ?
B5A B6A B11A B7A -138.1(3) . . . . ?
B2A B6A B11A B7A -37.0(3) . . . . ?
B1A B6A B11A B12A -63.1(4) . . . . ?
B5A B6A B11A B12A -101.1(3) . . . . ?
B2A B6A B11A B12A 0.0(4) . . . . ?
B7A B6A B11A B12A 37.0(3) . . . . ?
B1A B6A B11A B10A 0.6(4) . . . . ?
B5A B6A B11A B10A -37.5(3) . . . . ?
B2A B6A B11A B10A 63.7(4) . . . . ?
B7A B6A B11A B10A 100.7(4) . . . . ?
B2A B7A B11A B5A 0.3(4) . . . . ?
B12A B7A B11A B5A 101.1(3) . . . . ?
B6A B7A B11A B5A -37.3(3) . . . . ?
B8A B7A B11A B5A 63.7(4) . . . . ?
B2A B7A B11A B6A 37.6(3) . . . . ?
B12A B7A B11A B6A 138.4(3) . . . . ?
B8A B7A B11A B6A 101.0(3) . . . . ?
B2A B7A B11A B12A -100.8(3) . . . . ?
B6A B7A B11A B12A -138.4(3) . . . . ?
B8A B7A B11A B12A -37.4(3) . . . . ?
B2A B7A B11A B10A -63.3(4) . . . . ?
B12A B7A B11A B10A 37.4(3) . . . . ?
B6A B7A B11A B10A -100.9(3) . . . . ?
B8A B7A B11A B10A 0.1(4) . . . . ?
B4A B10A B11A B5A -37.6(3) . . . . ?
B9A B10A B11A B5A -100.4(4) . . . . ?
B12A B10A B11A B5A -138.0(3) . . . . ?
B4A B10A B11A B6A -0.3(5) . . . . ?
B9A B10A B11A B6A -63.1(4) . . . . ?
B5A B10A B11A B6A 37.3(3) . . . . ?
B12A B10A B11A B6A -100.7(4) . . . . ?
B4A B10A B11A B7A 63.2(4) . . . . ?
B9A B10A B11A B7A 0.4(4) . . . . ?
B5A B10A B11A B7A 100.8(3) . . . . ?
B12A B10A B11A B7A -37.1(3) . . . . ?
B4A B10A B11A B12A 100.4(4) . . . . ?
B9A B10A B11A B12A 37.6(3) . . . . ?
B5A B10A B11A B12A 138.0(3) . . . . ?
B2A B7A B12A B8A -37.4(3) . . . . ?
B6A B7A B12A B8A -101.2(3) . . . . ?
B11A B7A B12A B8A -138.3(3) . . . . ?
B2A B7A B12A B11A 100.9(4) . . . . ?
B6A B7A B12A B11A 37.2(3) . . . . ?
B8A B7A B12A B11A 138.3(3) . . . . ?
B2A B7A B12A B9A 0.6(5) . . . . ?
B6A B7A B12A B9A -63.2(4) . . . . ?
B11A B7A B12A B9A -100.3(4) . . . . ?
B8A B7A B12A B9A 38.0(3) . . . . ?
B2A B7A B12A B10A 63.5(4) . . . . ?
B6A B7A B12A B10A -0.2(4) . . . . ?
B11A B7A B12A B10A -37.4(3) . . . . ?
B8A B7A B12A B10A 101.0(3) . . . . ?
B2A B8A B12A B7A 36.9(3) . . . . ?
B3A B8A B12A B7A 100.4(4) . . . . ?
B9A B8A B12A B7A 137.5(4) . . . . ?
B2A B8A B12A B11A -0.5(4) . . . . ?
B3A B8A B12A B11A 62.9(4) . . . . ?
B7A B8A B12A B11A -37.5(3) . . . . ?
B9A B8A B12A B11A 100.0(3) . . . . ?
B2A B8A B12A B9A -100.5(3) . . . . ?
B3A B8A B12A B9A -37.1(3) . . . . ?
B7A B8A B12A B9A -137.5(4) . . . . ?
B2A B8A B12A B10A -64.0(4) . . . . ?
B3A B8A B12A B10A -0.6(4) . . . . ?
B7A B8A B12A B10A -101.0(4) . . . . ?
B9A B8A B12A B10A 36.5(3) . . . . ?
B5A B11A B12A B7A -100.5(4) . . . . ?
B6A B11A B12A B7A -37.2(3) . . . . ?
B10A B11A B12A B7A -138.2(3) . . . . ?
B5A B11A B12A B8A -62.9(4) . . . . ?
B6A B11A B12A B8A 0.3(4) . . . . ?
B7A B11A B12A B8A 37.6(3) . . . . ?
B10A B11A B12A B8A -100.7(3) . . . . ?
B5A B11A B12A B9A 0.6(4) . . . . ?
B6A B11A B12A B9A 63.8(4) . . . . ?
B7A B11A B12A B9A 101.0(4) . . . . ?
B10A B11A B12A B9A -37.2(3) . . . . ?
B5A B11A B12A B10A 37.7(3) . . . . ?
B6A B11A B12A B10A 101.0(3) . . . . ?
B7A B11A B12A B10A 138.2(3) . . . . ?
B3A B9A B12A B7A -0.9(5) . . . . ?
B4A B9A B12A B7A 63.0(4) . . . . ?
B10A B9A B12A B7A 100.9(4) . . . . ?
B8A B9A B12A B7A -38.2(3) . . . . ?
B3A B9A B12A B8A 37.3(3) . . . . ?
B4A B9A B12A B8A 101.1(3) . . . . ?
B10A B9A B12A B8A 139.0(3) . . . . ?
B3A B9A B12A B11A -64.4(4) . . . . ?
B4A B9A B12A B11A -0.5(4) . . . . ?
B10A B9A B12A B11A 37.3(3) . . . . ?
B8A B9A B12A B11A -101.7(4) . . . . ?
B3A B9A B12A B10A -101.7(4) . . . . ?
B4A B9A B12A B10A -37.9(3) . . . . ?
B8A B9A B12A B10A -139.0(3) . . . . ?
B4A B10A B12A B7A -63.2(4) . . . . ?
B9A B10A B12A B7A -100.6(3) . . . . ?
B11A B10A B12A B7A 37.5(3) . . . . ?
B5A B10A B12A B7A 0.2(4) . . . . ?
B4A B10A B12A B8A 0.7(4) . . . . ?
B9A B10A B12A B8A -36.7(3) . . . . ?
B11A B10A B12A B8A 101.3(3) . . . . ?
B5A B10A B12A B8A 64.1(4) . . . . ?
B4A B10A B12A B11A -100.7(4) . . . . ?
B9A B10A B12A B11A -138.1(3) . . . . ?
B5A B10A B12A B11A -37.3(3) . . . . ?
B4A B10A B12A B9A 37.4(3) . . . . ?
B11A B10A B12A B9A 138.1(3) . . . . ?
B5A B10A B12A B9A 100.8(3) . . . . ?
C41 N3 C11 C12 58.5(6) . . . . ?
C21 N3 C11 C12 178.9(5) . . . . ?
C31 N3 C11 C12 -58.6(6) . . . . ?
N3 C11 C12 C13 164.8(7) . . . . ?
C11 C12 C13 C14 113.6(12) . . . . ?
C41 N3 C21 C22 -58.8(6) . . . . ?
C11 N3 C21 C22 -179.7(5) . . . . ?
C31 N3 C21 C22 59.2(6) . . . . ?
N3 C21 C22 C23B 173.6(5) . . . . ?
N3 C21 C22 C23A 173.6(5) . . . . ?
C21 C22 C23A C24A -165.9(12) . . . . ?
C21 C22 C23B C24B -78.5(9) . . . . ?
C41 N3 C31 C32 -179.2(4) . . . . ?
C11 N3 C31 C32 -58.4(6) . . . . ?
C21 N3 C31 C32 59.8(6) . . . . ?
N3 C31 C32 C33 -179.7(5) . . . . ?
C31 C32 C33 C34 -73.5(8) . . . . ?
C11 N3 C41 C42 62.8(6) . . . . ?
C21 N3 C41 C42 -54.6(6) . . . . ?
C31 N3 C41 C42 -177.0(5) . . . . ?
N3 C41 C42 C43B 178.0(5) . . . . ?
N3 C41 C42 C43A 178.0(5) . . . . ?
C41 C42 C43A C44A -172.9(8) . . . . ?
C41 C42 C43B C44B 73.9(9) . . . . ?
C71 N4 C51 C52 -57.7(5) . . . . ?
C81 N4 C51 C52 -179.3(4) . . . . ?
C61 N4 C51 C52 59.3(5) . . . . ?
N4 C51 C52 C53B 176.7(5) . . . . ?
N4 C51 C52 C53A 176.7(5) . . . . ?
C51 C52 C53A C54A -176.5(7) . . . . ?
C51 C52 C53B C54B -67.8(16) . . . . ?
C71 N4 C61 C62 178.8(4) . . . . ?
C81 N4 C61 C62 -60.3(5) . . . . ?
C51 N4 C61 C62 58.4(5) . . . . ?
N4 C61 C62 C63 177.1(4) . . . . ?
C61 C62 C63 C64 -67.7(7) . . . . ?
C81 N4 C71 C72 56.7(5) . . . . ?
C51 N4 C71 C72 -61.9(4) . . . . ?
C61 N4 C71 C72 177.3(4) . . . . ?
N4 C71 C72 C73 170.0(4) . . . . ?
C71 C72 C73 C74 -70.5(6) . . . . ?
C71 N4 C81 C82 62.3(5) . . . . ?
C51 N4 C81 C82 -176.5(4) . . . . ?
C61 N4 C81 C82 -54.8(5) . . . . ?
N4 C81 C82 C83 -174.2(4) . . . . ?
C81 C82 C83 C84 -171.8(5) . . . . ?
 
_refine_diff_density_max    0.357
_refine_diff_density_min   -0.283
_refine_diff_density_rms    0.036

_shelx_res_file
;
TITL zh_a.res in P-1
    Zh361.res
    created by SHELXL-2018/3 at 21:32:25 on 05-Feb-2021
REM Old TITL zh in P-1
REM SHELXT solution in P-1: R1 0.295, Rweak 0.050, Alpha 0.094
REM <I/s>   0.000 for    0 systematic absences,  Orientation as input
REM Formula found by SHELXT:  C46 B22 N7

CELL  0.71073  11.4609  18.020  19.186  112.896  100.698  101.699
ZERR    4.000   0.0012   0.002   0.003    0.007    0.008    0.005
LATT  1
SFAC C  H   B  N
UNIT 96 228 48 12
TEMP 23.000
SIZE 0.40 0.30 0.03
L.S. 10
EXYZ C23A C23B
EADP C23A C23B
EXYZ C43A C43B
EADP C43A C43B
EXYZ C53A C53B
EADP C53A C53B
SADI 0.005 C13 C14 C23A C24A C23B C24B C33 C34 C43A C44A C43B C44B =
     C53A C54A C53B C54B C63 C64 C73 C74 C83 C84
BOND $H
FMAP 2
PLAN 20
ACTA
CONF
HTAB
SHEL 5 0.5
OMIT -2 55
OMIT     3  -5   1
OMIT    -2  10  10
OMIT    -2   1   9
WGHT    0.108500
FVAR       0.16229   0.71159
N1    4    0.640133    0.776066    0.621292    11.00000    0.05159    0.05044 =
         0.06893    0.03354    0.00927    0.01132
AFIX  43
H1B   2    0.639550    0.740459    0.640871    11.00000   -1.20000
AFIX   0
N2    4    0.542745    0.801375    0.522111    11.00000    0.06339    0.05000 =
         0.07779    0.03391    0.00540    0.00782
AFIX  43
H2B   2    0.599663    0.849582    0.546066    11.00000   -1.20000
AFIX   0
C1    1    0.552376    0.749622    0.556139    11.00000    0.05214    0.04301 =
         0.06554    0.02500    0.01891    0.01149
C2    1    0.463272    0.663211    0.519872    11.00000    0.07211    0.05271 =
         0.07464    0.02822    0.00576   -0.00382
AFIX 137
H2D   2    0.461330    0.643361    0.559511    11.00000   -1.50000
H2E   2    0.489216    0.625942    0.478576    11.00000   -1.50000
H2F   2    0.381596    0.664403    0.498053    11.00000   -1.50000
AFIX   0
C3    1    0.455644    0.790493    0.453989    11.00000    0.05649    0.05608 =
         0.06144    0.02698    0.01471    0.02273
C4    1    0.417505    0.858788    0.457101    11.00000    0.08242    0.07536 =
         0.07596    0.03693    0.01799    0.03548
AFIX  43
H4B   2    0.445520    0.908708    0.503850    11.00000   -1.20000
AFIX   0
C5    1    0.337675    0.853329    0.390906    11.00000    0.09879    0.10497 =
         0.10356    0.06151    0.02764    0.05693
AFIX  43
H5B   2    0.312569    0.899961    0.393192    11.00000   -1.20000
AFIX   0
C6    1    0.295249    0.781028    0.322564    11.00000    0.09681    0.12302 =
         0.07892    0.04653    0.00158    0.03664
AFIX  43
H6B   2    0.240747    0.777654    0.278215    11.00000   -1.20000
AFIX   0
C7    1    0.333530    0.712810    0.319451    11.00000    0.09469    0.10100 =
         0.07114    0.02774    0.00828    0.02236
AFIX  43
H7B   2    0.304827    0.662920    0.272654    11.00000   -1.20000
AFIX   0
C8    1    0.414530    0.717503    0.385334    11.00000    0.07597    0.07091 =
         0.06955    0.02882    0.01632    0.02453
AFIX  43
H8B   2    0.440714    0.671162    0.382763    11.00000   -1.20000
AFIX   0
B1    3    0.744543    0.859807    0.669281    11.00000    0.04180    0.04034 =
         0.06499    0.02682    0.01340    0.00973
B2    3    0.733692    0.959617    0.680805    11.00000    0.04972    0.04783 =
         0.09834    0.03889    0.01053    0.01643
H2    2    0.649771    0.969034    0.653630    11.00000   -1.20000
B3    3    0.739551    0.934190    0.761452    11.00000    0.05504    0.05602 =
         0.08443    0.03083    0.03236    0.01460
H3    2    0.660646    0.917855    0.780960    11.00000   -1.20000
B4    3    0.843477    0.873008    0.758170    11.00000    0.05249    0.04580 =
         0.06105    0.03156    0.02059    0.00841
H4    2    0.829984    0.823506    0.779204    11.00000   -1.20000
B5    3    0.901259    0.860328    0.676605    11.00000    0.04737    0.04875 =
         0.06374    0.03021    0.02055    0.01865
H5    2    0.916143    0.799002    0.644329    11.00000   -1.20000
B6    3    0.833765    0.914507    0.627917    11.00000    0.06052    0.05967 =
         0.05998    0.03837    0.01392    0.01029
H6    2    0.805364    0.889624    0.563260    11.00000   -1.20000
B7    3    0.884545    1.023128    0.695056    11.00000    0.06385    0.05517 =
         0.08846    0.04979    0.01389    0.01040
H7    2    0.893216    1.072151    0.670686    11.00000   -1.20000
B8    3    0.826364    1.035040    0.777022    11.00000    0.06133    0.04336 =
         0.09028    0.01882    0.02612    0.01621
H8    2    0.808334    1.089473    0.812128    11.00000   -1.20000
B9    3    0.895205    0.981473    0.825171    11.00000    0.06815    0.05104 =
         0.06089    0.02173    0.02305    0.00373
H9    2    0.909836    1.004800    0.890707    11.00000   -1.20000
B10   3    0.993256    0.935465    0.772747    11.00000    0.04529    0.05223 =
         0.07178    0.03654    0.01868    0.01007
H10   2    1.077532    0.929600    0.804420    11.00000   -1.20000
B11   3    0.988036    0.962232    0.693037    11.00000    0.05352    0.06382 =
         0.07301    0.04128    0.02767    0.01270
H11   2    1.074110    0.969185    0.668819    11.00000   -1.20000
B12   3    0.982084    1.036276    0.784197    11.00000    0.05030    0.04546 =
         0.07480    0.03062    0.01339   -0.00032
H12   2    1.061942    1.093106    0.823283    11.00000   -1.20000
N1A   4    0.664846    0.778084    0.864724    11.00000    0.07032    0.04127 =
         0.06440    0.01572    0.04063    0.00174
AFIX  43
H1C   2    0.711314    0.798599    0.842098    11.00000   -1.20000
AFIX   0
N2A   4    0.594758    0.809432    0.971980    11.00000    0.07689    0.04588 =
         0.05946    0.01566    0.03629    0.00611
AFIX  43
H2C   2    0.561073    0.755828    0.953594    11.00000   -1.20000
AFIX   0
C1A   1    0.661102    0.833380    0.931174    11.00000    0.08364    0.04490 =
         0.06735    0.01756    0.04193    0.00763
C2A   1    0.730472    0.924248    0.962623    11.00000    0.17745    0.04064 =
         0.11758    0.01280    0.09162   -0.00650
AFIX 137
H2AB  2    0.752504    0.935013    0.920804    11.00000   -1.50000
H2AC  2    0.804797    0.938532    1.003927    11.00000   -1.50000
H2AD  2    0.678986    0.957977    0.983481    11.00000   -1.50000
AFIX   0
C3A   1    0.571455    0.861024    1.042928    11.00000    0.05484    0.05501 =
         0.04527    0.01374    0.01407    0.01286
C4A   1    0.452949    0.857355    1.043994    11.00000    0.05011    0.13705 =
         0.06302    0.02702    0.01436    0.02152
AFIX  43
H4AA  2    0.387397    0.822112    0.998309    11.00000   -1.20000
AFIX   0
C5A   1    0.428348    0.905825    1.112808    11.00000    0.07637    0.16811 =
         0.08560    0.04219    0.03847    0.05859
AFIX  43
H5AA  2    0.346541    0.902388    1.113513    11.00000   -1.20000
AFIX   0
C6A   1    0.524005    0.958143    1.178915    11.00000    0.10346    0.12081 =
         0.06906    0.02455    0.03520    0.05296
AFIX  43
H6AA  2    0.508377    0.991640    1.224974    11.00000   -1.20000
AFIX   0
C7A   1    0.641640    0.961333    1.177518    11.00000    0.09895    0.07458 =
         0.05458    0.01769    0.01030    0.02084
AFIX  43
H7AA  2    0.706942    0.996957    1.223236    11.00000   -1.20000
AFIX   0
C8A   1    0.667914    0.913089    1.109969    11.00000    0.05889    0.06214 =
         0.05834    0.01918    0.01453    0.01375
AFIX  43
H8AA  2    0.749853    0.915910    1.110001    11.00000   -1.20000
AFIX   0
B1A   3    0.601268    0.682549    0.819120    11.00000    0.04182    0.03561 =
         0.05735    0.01752    0.02568    0.01111
B2A   3    0.486346    0.642225    0.727679    11.00000    0.05447    0.05834 =
         0.05623    0.03097    0.01691    0.03120
H2A   2    0.463148    0.683390    0.707396    11.00000   -1.20000
B3A   3    0.635281    0.628780    0.730434    11.00000    0.05594    0.04050 =
         0.06421    0.02664    0.03323    0.01541
H3A   2    0.702573    0.660961    0.708280    11.00000   -1.20000
B4A   3    0.686378    0.610711    0.813375    11.00000    0.03779    0.04402 =
         0.06331    0.01973    0.01206    0.01055
H4A   2    0.789526    0.633324    0.846475    11.00000   -1.20000
B5A   3    0.568841    0.613376    0.862113    11.00000    0.04827    0.04447 =
         0.05831    0.02370    0.02284    0.01306
H5A   2    0.586635    0.637081    0.927764    11.00000   -1.20000
B6A   3    0.445817    0.633287    0.809261    11.00000    0.03953    0.04456 =
         0.05715    0.01744    0.01846    0.01536
H6A   2    0.388018    0.674255    0.845265    11.00000   -1.20000
B7A   3    0.383344    0.547781    0.713147    11.00000    0.04142    0.06005 =
         0.06495    0.01878    0.01299    0.01561
H7A   2    0.281552    0.528650    0.679815    11.00000   -1.20000
B8A   3    0.500804    0.545289    0.664279    11.00000    0.05756    0.04956 =
         0.05306    0.01953    0.02327    0.02094
H8A   2    0.482188    0.518921    0.597071    11.00000   -1.20000
B9A   3    0.624879    0.525892    0.718375    11.00000    0.04040    0.03933 =
         0.07146    0.02034    0.02549    0.01458
H9A   2    0.681188    0.491846    0.688059    11.00000   -1.20000
B10A  3    0.583512    0.515166    0.799024    11.00000    0.06049    0.05152 =
         0.07612    0.03817    0.02748    0.02371
H10A  2    0.617292    0.473013    0.821577    11.00000   -1.20000
B11A  3    0.434087    0.529174    0.796176    11.00000    0.04831    0.04333 =
         0.07482    0.02315    0.03507    0.01173
H11A  2    0.368679    0.496028    0.819218    11.00000   -1.20000
B12A  3    0.467443    0.474873    0.706621    11.00000    0.04624    0.03767 =
         0.07439    0.01467    0.02436    0.00745
H12A  2    0.415906    0.403382    0.668912    11.00000   -1.20000
N3    4    0.730304    0.753235    0.248734    11.00000    0.08880    0.05462 =
         0.09799    0.04714    0.03820    0.01121
N4    4    0.935938    0.335411    0.258529    11.00000    0.04089    0.06095 =
         0.07980    0.03725    0.02345    0.02533
C11   1    0.782607    0.714728    0.300217    11.00000    0.10959    0.07194 =
         0.11587    0.06003    0.03390    0.01970
AFIX  23
H11B  2    0.772389    0.655976    0.266601    11.00000   -1.20000
H11C  2    0.733617    0.715682    0.336535    11.00000   -1.20000
AFIX   0
C12   1    0.918740    0.758011    0.347899    11.00000    0.12410    0.16772 =
         0.18724    0.12966    0.01105    0.01619
AFIX  23
H12B  2    0.935556    0.818889    0.372205    11.00000   -1.20000
H12C  2    0.971457    0.743783    0.313680    11.00000   -1.20000
AFIX   0
C13   1    0.947031    0.726364    0.414555    11.00000    0.18350    0.28197 =
         0.34856    0.22659    0.00576    0.06812
AFIX  23
H13A  2    0.983514    0.774533    0.466248    11.00000   -1.20000
H13B  2    0.870223    0.691913    0.414697    11.00000   -1.20000
AFIX   0
C14   1    1.031194    0.678122    0.398106    11.00000    0.59502    0.40352 =
         0.36888    0.28609    0.30598    0.27449
AFIX  33
H14A  2    1.048993    0.658699    0.437764    11.00000   -1.50000
H14B  2    0.994225    0.630391    0.347040    11.00000   -1.50000
H14C  2    1.107136    0.712734    0.398419    11.00000   -1.50000
AFIX   0
C21   1    0.595493    0.698969    0.206087    11.00000    0.09023    0.06699 =
         0.11189    0.04895    0.03363    0.00185
AFIX  23
H21A  2    0.594160    0.641093    0.176324    11.00000   -1.20000
H21B  2    0.552805    0.699779    0.245434    11.00000   -1.20000
AFIX   0
C22   1    0.523063    0.725350    0.149990    11.00000    0.10158    0.13375 =
         0.18700    0.11084    0.00054    0.00243
AFIX  23
H22A  2    0.568416    0.730027    0.113180    11.00000   -1.20000
H22B  2    0.513989    0.780273    0.179809    11.00000   -1.20000
AFIX   0
PART 1
C23A  1    0.395247    0.660861    0.104509    10.50000    0.12934    0.15159 =
         0.16304    0.10488   -0.00701   -0.00570
AFIX  23
H23A  2    0.406956    0.605439    0.088583    10.50000   -1.20000
H23B  2    0.347138    0.666659    0.141882    10.50000   -1.20000
AFIX   0
C24A  1    0.317827    0.659617    0.035348    10.50000    0.24725
AFIX  33
H24A  2    0.241108    0.614544    0.015052    10.50000   -1.50000
H24B  2    0.300293    0.712573    0.049324    10.50000   -1.50000
H24C  2    0.360550    0.650904   -0.004367    10.50000   -1.50000
AFIX   0
PART 2
C23B  1    0.395247    0.660861    0.104509    10.50000    0.12934    0.15159 =
         0.16304    0.10488   -0.00701   -0.00570
AFIX  23
H23C  2    0.359827    0.643265    0.139806    10.50000   -1.20000
H23D  2    0.340113    0.685892    0.082765    10.50000   -1.20000
AFIX   0
C24B  1    0.406816    0.588538    0.041277    10.50000    0.16426
AFIX  33
H24D  2    0.326104    0.547620    0.012388    10.50000   -1.50000
H24E  2    0.441187    0.606223    0.006273    10.50000   -1.50000
H24F  2    0.460845    0.563716    0.063153    10.50000   -1.50000
AFIX   0
PART 0
C31   1    0.743109    0.845454    0.298589    11.00000    0.10294    0.04857 =
         0.09884    0.03685    0.03185    0.00850
AFIX  23
H31A  2    0.831085    0.876566    0.322783    11.00000   -1.20000
H31B  2    0.709129    0.868015    0.263814    11.00000   -1.20000
AFIX   0
C32   1    0.679843    0.861409    0.362926    11.00000    0.14235    0.08749 =
         0.15039    0.05057    0.08393    0.01729
AFIX  23
H32A  2    0.714095    0.840241    0.398898    11.00000   -1.20000
H32B  2    0.591479    0.831193    0.339594    11.00000   -1.20000
AFIX   0
C33   1    0.698143    0.956045    0.409011    11.00000    0.17082    0.06151 =
         0.16583    0.00838    0.07224    0.00732
AFIX  23
H33A  2    0.678640    0.978689    0.371478    11.00000   -1.20000
H33B  2    0.639263    0.962984    0.439651    11.00000   -1.20000
AFIX   0
C34   1    0.822050    1.004953    0.461812    11.00000    0.27026    0.10264 =
         0.09213    0.04707    0.07107    0.01579
AFIX  33
H34A  2    0.825851    1.063251    0.488310    11.00000   -1.50000
H34B  2    0.841636    0.984204    0.500263    11.00000   -1.50000
H34C  2    0.881075    0.999934    0.431984    11.00000   -1.50000
AFIX   0
C41   1    0.802093    0.753467    0.189972    11.00000    0.10639    0.06088 =
         0.10531    0.04740    0.04888    0.01516
AFIX  23
H41A  2    0.888522    0.785772    0.219277    11.00000   -1.20000
H41B  2    0.769763    0.782779    0.161598    11.00000   -1.20000
AFIX   0
C42   1    0.798148    0.666962    0.129556    11.00000    0.14549    0.09472 =
         0.14359    0.05948    0.07691    0.03132
AFIX  23
H42A  2    0.712270    0.633306    0.100056    11.00000   -1.20000
H42B  2    0.834408    0.637801    0.156689    11.00000   -1.20000
AFIX   0
PART 1
C43A  1    0.870326    0.676630    0.072629    10.50000    0.15789    0.12376 =
         0.12820    0.04781    0.07496    0.04351
AFIX  23
H43A  2    0.840793    0.713035    0.052132    10.50000   -1.20000
H43B  2    0.957475    0.705289    0.102521    10.50000   -1.20000
AFIX   0
C44A  1    0.862196    0.599626    0.006443    10.50000    0.16667
AFIX  33
H44A  2    0.910639    0.612845   -0.025329    10.50000   -1.50000
H44B  2    0.893780    0.563498    0.025566    10.50000   -1.50000
H44C  2    0.776754    0.571267   -0.024972    10.50000   -1.50000
AFIX   0
PART 2
C43B  1    0.870326    0.676630    0.072629    10.50000    0.15789    0.12376 =
         0.12820    0.04781    0.07496    0.04351
AFIX  23
H43C  2    0.849863    0.622462    0.026960    10.50000   -1.20000
H43D  2    0.846454    0.716053    0.054290    10.50000   -1.20000
AFIX   0
C44B  1    1.002903    0.707157    0.111545    10.50000    0.14291
AFIX  33
H44D  2    1.047075    0.712935    0.075136    10.50000   -1.50000
H44E  2    1.023144    0.761112    0.156312    10.50000   -1.50000
H44F  2    1.026546    0.667700    0.129034    10.50000   -1.50000
AFIX   0
PART 0
C51   1    0.907785    0.398955    0.229818    11.00000    0.05898    0.08695 =
         0.12639    0.07283    0.04208    0.03736
AFIX  23
H51A  2    0.830320    0.371301    0.187101    11.00000   -1.20000
H51B  2    0.894301    0.444136    0.272712    11.00000   -1.20000
AFIX   0
C52   1    1.004625    0.437488    0.201322    11.00000    0.06568    0.09558 =
         0.13177    0.07744    0.03923    0.03621
AFIX  23
H52A  2    1.081016    0.468666    0.244696    11.00000   -1.20000
H52B  2    1.021730    0.392708    0.160064    11.00000   -1.20000
AFIX   0
PART 1
C53A  1    0.967688    0.494940    0.170114    21.00000    0.10773    0.15966 =
         0.22545    0.14982    0.08524    0.06054
AFIX  23
H53A  2    0.888363    0.464460    0.129235    21.00000   -1.20000
H53B  2    0.955248    0.541265    0.212465    21.00000   -1.20000
AFIX   0
C54A  1    1.056264    0.529894    0.137406    21.00000    0.16866
AFIX  33
H54A  2    1.025128    0.566346    0.118556    21.00000   -1.50000
H54B  2    1.134634    0.561702    0.177703    21.00000   -1.50000
H54C  2    1.067627    0.484757    0.094320    21.00000   -1.50000
AFIX   0
PART 2
C53B  1    0.967688    0.494940    0.170114   -21.00000    0.10773    0.15966 =
         0.22545    0.14982    0.08524    0.06054
AFIX  23
H53C  2    0.941847    0.536617    0.208810   -21.00000   -1.20000
H53D  2    1.037893    0.524482    0.159633   -21.00000   -1.20000
AFIX   0
C54B  1    0.865944    0.446067    0.097843   -21.00000    0.21462
AFIX  33
H54D  2    0.841437    0.483111    0.077208   -21.00000   -1.50000
H54E  2    0.892303    0.405273    0.059655   -21.00000   -1.50000
H54F  2    0.796545    0.417372    0.108685   -21.00000   -1.50000
AFIX   0
PART 0
C61   1    1.054899    0.374470    0.327037    11.00000    0.05153    0.06485 =
         0.06929    0.02334    0.01405    0.01878
AFIX  23
H61A  2    1.068718    0.330999    0.342523    11.00000   -1.20000
H61B  2    1.123624    0.390812    0.307837    11.00000   -1.20000
AFIX   0
C62   1    1.060565    0.450673    0.400561    11.00000    0.14911    0.08192 =
         0.10330    0.01397    0.06603    0.05000
AFIX  23
H62A  2    0.991836    0.436640    0.420657    11.00000   -1.20000
H62B  2    1.053993    0.497041    0.387835    11.00000   -1.20000
AFIX   0
C63   1    1.188514    0.477490    0.465062    11.00000    0.13472    0.12484 =
         0.07965   -0.01015    0.03345   -0.04924
AFIX  23
H63A  2    1.256579    0.485164    0.442597    11.00000   -1.20000
H63B  2    1.198997    0.530893    0.509319    11.00000   -1.20000
AFIX   0
C64   1    1.192029    0.413463    0.492683    11.00000    0.17869    0.25013 =
         0.09848    0.04142   -0.00957   -0.02191
AFIX  33
H64A  2    1.270329    0.430655    0.531843    11.00000   -1.50000
H64B  2    1.125305    0.406483    0.515550    11.00000   -1.50000
H64C  2    1.182781    0.360838    0.448951    11.00000   -1.50000
AFIX   0
C71   1    0.958635    0.263651    0.194692    11.00000    0.04704    0.05972 =
         0.06481    0.02587    0.00941    0.01818
AFIX  23
H71A  2    0.982058    0.226832    0.216792    11.00000   -1.20000
H71B  2    1.029465    0.286983    0.180577    11.00000   -1.20000
AFIX   0
C72   1    0.851973    0.209939    0.119455    11.00000    0.07132    0.09615 =
         0.08702    0.03706   -0.01974   -0.00435
AFIX  23
H72A  2    0.818550    0.246416    0.100812    11.00000   -1.20000
H72B  2    0.786033    0.177263    0.130592    11.00000   -1.20000
AFIX   0
C73   1    0.894219    0.150315    0.055213    11.00000    0.13765    0.06499 =
         0.06805    0.01267   -0.00610   -0.01211
AFIX  23
H73A  2    0.938194    0.119762    0.076789    11.00000   -1.20000
H73B  2    0.821296    0.109239    0.012493    11.00000   -1.20000
AFIX   0
C74   1    0.974733    0.192868    0.023259    11.00000    0.22701    0.11177 =
         0.09059    0.00841    0.04660   -0.03352
AFIX  33
H74A  2    0.998017    0.151925   -0.016829    11.00000   -1.50000
H74B  2    0.931241    0.222154    0.000558    11.00000   -1.50000
H74C  2    1.048225    0.232686    0.064901    11.00000   -1.50000
AFIX   0
C81   1    0.825080    0.304824    0.282922    11.00000    0.05142    0.08521 =
         0.11345    0.05947    0.03916    0.03373
AFIX  23
H81A  2    0.810781    0.353863    0.320911    11.00000   -1.20000
H81B  2    0.752531    0.277782    0.236701    11.00000   -1.20000
AFIX   0
C82   1    0.833169    0.244267    0.318497    11.00000    0.06593    0.09038 =
         0.10415    0.06105    0.03956    0.03786
AFIX  23
H82A  2    0.899262    0.272670    0.368241    11.00000   -1.20000
H82B  2    0.854558    0.197045    0.283182    11.00000   -1.20000
AFIX   0
C83   1    0.712640    0.211170    0.332977    11.00000    0.10775    0.14060 =
         0.18413    0.12257    0.08941    0.07288
AFIX  23
H83A  2    0.685425    0.258917    0.361308    11.00000   -1.20000
H83B  2    0.649919    0.176582    0.282166    11.00000   -1.20000
AFIX   0
C84   1    0.717605    0.161662    0.377112    11.00000    0.15218    0.11336 =
         0.13029    0.07713    0.07551    0.05685
AFIX  33
H84A  2    0.636943    0.143618    0.383193    11.00000   -1.50000
H84B  2    0.741780    0.113039    0.348997    11.00000   -1.50000
H84C  2    0.777375    0.195582    0.428339    11.00000   -1.50000

AFIX   0
HKLF 4


REM  zh_a.res in P-1
REM wR2 = 0.2784, GooF = S = 0.903, Restrained GooF = 0.909 for all data
REM R1 = 0.0891 for 4265 Fo > 4sig(Fo) and 0.2983 for all 15532 data
REM 769 parameters refined using 55 restraints

END

WGHT      0.1085      0.0000

REM No hydrogen bonds found for HTAB generation

REM Highest difference peak  0.357,  deepest hole -0.283,  1-sigma level  0.036
Q1    1   0.9540  0.6918  0.3824  11.00000  0.05    0.36
Q2    1   1.0814  0.5750  0.1891  11.00000  0.05    0.26
Q3    1   1.0520  0.7480  0.4558  11.00000  0.05    0.26
Q4    1   1.1677  0.5263  0.4423  11.00000  0.05    0.20
Q5    1   0.2826  0.7022  0.0909  11.00000  0.05    0.19
Q6    1   0.3637  0.6090  0.0310  11.00000  0.05    0.19
Q7    1   0.9935  0.4746  0.3842  11.00000  0.05    0.18
Q8    1   0.8993  0.6882  0.1829  11.00000  0.05    0.17
Q9    1   1.0181  0.1454  0.0595  11.00000  0.05    0.16
Q10   1   0.9332  0.6332  0.0303  11.00000  0.05    0.16
Q11   1   0.9513  0.6686  0.4276  11.00000  0.05    0.16
Q12   1   0.5988  0.8645  0.3058  11.00000  0.05    0.15
Q13   1   1.0791  0.4266  0.2093  11.00000  0.05    0.14
Q14   1   0.8885  0.7194  0.4796  11.00000  0.05    0.14
Q15   1   0.4663  0.7998  0.2646  11.00000  0.05    0.13
Q16   1   0.7497  0.2611  0.4181  11.00000  0.05    0.13
Q17   1   0.5232  0.5373  0.8129  11.00000  0.05    0.13
Q18   1   0.5741  0.7135  0.3903  11.00000  0.05    0.13
Q19   1   0.6291  0.1366  0.2212  11.00000  0.05    0.12
Q20   1   0.5831  0.9629  0.3947  11.00000  0.05    0.12
;
_shelx_res_checksum   84196

_shelx_hkl_file
;
   1   0  -1    0.00    0.06
   1   0  -1   -0.06    0.05
  -1   0   1    0.03    0.08
  -1   0   1   -0.05    0.07
   2   0  -2    6.58    0.42
   2   0  -2    7.66    0.48
   3   0  -3  326.13   10.95
   3   0  -3  316.36   10.96
  -3   0   3  320.00   10.94
   4   0  -4  128.36    4.55
   4   0  -4  126.85    4.58
  -4   0   4  130.80    4.53
   5   0  -5   19.62    1.13
  -5   0   5   19.61    1.22
  -5   0   5   19.40    0.98
   6   0  -6   11.09    0.89
  -6   0   6    9.34    0.74
  -6   0   6    9.38    0.94
   7   0  -7   17.44    1.30
  -7   0   7   16.54    1.41
  -7   0   7   18.41    1.06
   8   0  -8    0.55    0.76
  -8   0   8   -0.82    0.78
  -8   0   8   -0.17    0.49
  -8   0   8   -0.71    0.47
   9   0  -9    2.53    0.96
  -9   0   9    2.38    0.97
  10   0 -10   -0.06    0.93
 -10   0  10    2.23    1.05
  11   0 -11   -0.26    0.99
 -11   0  11   -0.02    1.03
  12   0 -12    0.07    1.02
 -12   0  12    0.12    1.15
  13   0 -13    1.64    1.18
 -13   0  13   -0.67    1.20
 -13   1  12    0.58    1.10
  13  -1 -12   -1.60    1.09
 -12   1  11    0.99    1.10
  12  -1 -11    0.39    1.08
 -11   1  10    1.64    1.01
  11  -1 -10    2.45    1.05
 -10   1   9    0.16    0.98
  10  -1  -9    1.19    0.87
  -9   1   8    3.18    1.03
   9  -1  -8    2.62    0.93
  -8   1   7    0.83    0.52
  -8   1   7    0.89    0.89
   8  -1  -7    0.66    0.80
  -7   1   6    4.22    0.58
  -7   1   6    4.04    0.81
   7  -1  -6    2.63    0.73
  -6   1   5    2.76    0.48
  -6   1   5    1.48    0.67
   6  -1  -5    1.89    0.61
  -5   1   4    6.51    0.57
   5  -1  -4    7.67    0.69
  -4   1   3    1.13    0.37
   4  -1  -3    1.14    0.49
   4  -1  -3    1.13    0.40
  -3   1   2   21.41    0.97
   3  -1  -2   22.61    1.01
   3  -1  -2   22.63    1.04
  -2   1   1    0.73    0.22
  -2   1   1    0.94    0.21
   2  -1  -1    0.05    0.19
   2  -1  -1   -0.09    0.24
  -1   1   0    0.03    0.09
  -1   1   0   -0.03    0.08
   1  -1   0   -0.07    0.06
   1  -1   0   -0.02    0.07
   0   1  -1    0.00    0.04
   0   1  -1   -0.04    0.03
   0   1  -1    0.01    0.03
   0  -1   1   -0.01    0.01
   0  -1   1   -0.01    0.04
   0  -1   1    0.04    0.04
   1   1  -2   -0.15    0.11
   1   1  -2   -0.01    0.12
  -1  -1   2    0.01    0.12
   2   1  -3  689.36   23.77
   2   1  -3  705.93   23.76
  -2  -1   3  687.03   24.47
  -2  -1   3  711.99   23.76
  -2  -1   3  718.12   23.76
   3   1  -4    4.97    0.55
   3   1  -4    4.97    0.47
  -3  -1   4    4.76    0.61
  -3  -1   4    4.62    0.46
  -3  -1   4    4.94    0.49
   4   1  -5   20.04    1.10
   4   1  -5   18.71    1.03
  -4  -1   5   22.42    1.00
  -4  -1   5   20.88    1.20
  -4  -1   5   21.96    1.03
   5   1  -6   56.08    2.23
  -5  -1   6   53.84    2.11
  -5  -1   6   52.90    2.43
  -5  -1   6   54.99    2.11
   6   1  -7   23.57    1.37
  -6  -1   7   22.54    1.15
  -6  -1   7   23.26    1.58
  -6  -1   7   25.11    1.20
   7   1  -8   -0.22    0.70
  -7  -1   8   -0.37    0.76
  -7  -1   8    0.14    0.50
   8   1  -9    6.24    0.97
  -8  -1   9    5.21    0.68
  -8  -1   9    5.16    1.09
   9   1 -10    1.39    0.93
  -9  -1  10   -0.40    0.83
  10   1 -11    0.72    0.92
 -10  -1  11   -0.58    0.84
  11   1 -12   -0.25    1.02
 -11  -1  12   -1.23    1.05
  12   1 -13   -0.85    1.08
 -12  -1  13   -0.01    1.17
  13   1 -14    1.90    1.25
 -13  -1  14   -0.54    1.23
 -14   2  12    0.50    1.12
  14  -2 -12    0.53    1.26
 -13   2  11    0.51    1.17
  13  -2 -11   -1.34    1.09
 -12   2  10    0.20    1.04
  12  -2 -10    0.55    1.06
 -11   2   9   -0.37    0.89
  11  -2  -9   -0.81    0.95
 -10   2   8    4.83    1.12
  10  -2  -8    3.88    1.00
  -9   2   7    2.17    0.58
  -9   2   7    2.78    1.03
   9  -2  -7    4.74    0.96
  -8   2   6    1.69    0.52
  -8   2   6    2.42    0.89
   8  -2  -6    2.30    0.83
  -7   2   5    0.10    0.70
  -7   2   5    0.56    0.48
   7  -2  -5    0.02    0.68
  -6   2   4    2.36    0.48
   6  -2  -4    2.55    0.61
  -5   2   3    0.67    0.40
   5  -2  -3    1.25    0.48
  -4   2   2    3.40    0.46
   4  -2  -2    4.92    0.52
   4  -2  -2    4.03    0.55
  -3   2   1    1.26    0.34
   3  -2  -1    1.40    0.39
   3  -2  -1    0.88    0.40
  -2   2   0    8.67    0.52
   2  -2   0    7.83    0.52
   2  -2   0    7.52    0.52
  -1   2  -1    0.19    0.14
  -1   2  -1    0.28    0.15
   1  -2   1    0.09    0.14
   1  -2   1   -0.16    0.13
   0   2  -2   -0.01    0.13
   0   2  -2   -0.09    0.13
   0  -2   2    0.01    0.14
   0  -2   2    0.06    0.09
   0  -2   2    0.11    0.14
   1   2  -3  186.01    5.87
   1   2  -3  154.98    5.85
   2   2  -4   51.23    1.99
   2   2  -4   54.18    1.98
   2   2  -4   52.46    1.98
  -2  -2   4   51.98    2.11
  -2  -2   4   53.63    1.96
   3   2  -5   12.36    0.90
   3   2  -5   12.02    0.78
  -3  -2   5   12.30    0.75
  -3  -2   5   14.23    1.01
   4   2  -6    3.90    0.61
  -4  -2   6    3.04    0.66
  -4  -2   6    3.92    0.50
   5   2  -7   92.76    3.53
  -5  -2   7   92.38    3.78
  -5  -2   7   97.57    3.47
   6   2  -8    0.28    0.68
  -6  -2   8    0.69    0.49
  -6  -2   8   -0.10    0.73
   7   2  -9    8.85    1.01
  -7  -2   9    8.74    1.13
  -7  -2   9    9.16    0.78
   8   2 -10    7.94    1.11
  -8  -2  10    9.19    0.82
  -8  -2  10    8.09    1.18
   9   2 -11    1.48    0.96
  -9  -2  11    2.31    0.99
  10   2 -12   -1.11    0.90
 -10  -2  12   -0.23    1.04
  11   2 -13    0.33    1.05
 -11  -2  13   -0.67    1.07
  12   2 -14    0.38    1.17
 -12  -2  14    2.11    1.25
  13   2 -15    0.59    1.25
 -13  -2  15   -1.59    1.12
 -14   3  11   -1.06    1.17
  14  -3 -11    0.16    1.27
 -13   3  10   -0.51    1.05
  13  -3 -10   -0.05    1.13
 -12   3   9   -0.11    0.95
  12  -3  -9   -0.16    0.96
 -11   3   8   -0.10    0.88
  11  -3  -8    0.03    0.90
 -10   3   7    0.53    0.82
  10  -3  -7   -0.35    0.82
  -9   3   6    2.92    0.60
  -9   3   6    0.85    0.89
   9  -3  -6    1.12    0.84
  -8   3   5    2.37    0.86
  -8   3   5    3.01    0.56
   8  -3  -5    4.69    0.86
  -7   3   4    2.47    0.52
   7  -3  -4    1.83    0.71
  -6   3   3    1.07    0.43
   6  -3  -3    1.39    0.58
  -5   3   2    4.06    0.51
   5  -3  -2    3.95    0.60
  -4   3   1    1.42    0.40
   4  -3  -1    1.07    0.49
  -3   3   0  171.29    5.96
   3  -3   0  169.82    5.99
   3  -3   0  174.11    5.99
  -2   3  -1   10.25    0.66
   2  -3   1    9.66    0.70
   2  -3   1   10.22    0.67
  -1   3  -2    9.48    0.60
   1  -3   2    6.72    0.57
   1  -3   2    6.55    0.54
   0   3  -3  510.04   18.52
   0   3  -3  546.45   18.53
   0  -3   3  581.80   18.53
   1   3  -4  141.83    4.98
   1   3  -4  143.99    4.97
  -1  -3   4  142.47    5.11
  -1  -3   4  143.42    4.97
  -1  -3   4  140.55    5.14
   2   3  -5   87.46    3.20
   2   3  -5   88.92    3.17
  -2  -3   5   83.82    3.27
  -2  -3   5   89.11    3.16
   3   3  -6   38.15    1.66
  -3  -3   6   38.63    1.77
  -3  -3   6   38.22    1.58
   4   3  -7  129.17    4.67
  -4  -3   7  132.22    4.62
  -4  -3   7  125.96    4.89
   5   3  -8   15.62    1.17
  -5  -3   8   18.00    0.99
  -5  -3   8   17.37    1.36
   6   3  -9    1.02    0.74
  -6  -3   9   -0.22    0.47
  -6  -3   9   -0.24    0.69
   7   3 -10    8.37    1.05
  -7  -3  10    8.78    0.82
  -7  -3  10    7.30    1.08
   8   3 -11    0.73    0.93
  -8  -3  11   -0.36    0.93
   9   3 -12   -0.25    0.94
  -9  -3  12   -0.23    0.98
  10   3 -13    0.31    0.96
 -10  -3  13    0.13    1.08
  11   3 -14   -0.58    1.09
 -11  -3  14    0.55    1.06
  12   3 -15   -0.49    1.16
 -12  -3  15    0.55    1.32
 -14   4  10   -0.31    1.19
  14  -4 -10    1.37    1.22
 -13   4   9   -1.26    1.03
  13  -4  -9    0.75    1.07
 -12   4   8   -0.75    1.00
  12  -4  -8   -0.36    0.99
 -11   4   7   -0.22    0.94
  11  -4  -7    2.38    1.04
 -10   4   6    0.49    0.81
  10  -4  -6   -0.44    0.88
  -9   4   5   -0.69    0.81
  -9   4   5    0.61    0.52
   9  -4  -5    0.21    0.82
  -8   4   4    1.31    0.57
   8  -4  -4    1.11    0.76
  -7   4   3   10.85    0.85
   7  -4  -3   10.48    0.98
  -6   4   2   11.35    0.83
   6  -4  -2   11.54    0.95
  -5   4   1   -0.48    0.37
   5  -4  -1   -0.25    0.50
  -4   4   0   30.67    1.38
   4  -4   0   31.81    1.44
  -3   4  -1   10.88    0.77
   3  -4   1    8.10    0.69
  -2   4  -2    9.84    0.81
   2  -4   2    9.83    0.70
  -1   4  -3  107.19    3.96
  -1   4  -3  111.77    3.99
   1  -4   3  116.62    3.98
   0   4  -4    1.58    0.46
   0  -4   4    1.67    0.37
   0  -4   4    1.39    0.41
   1   4  -5  138.47    4.93
  -1  -4   5  136.56    5.05
  -1  -4   5  141.66    5.03
  -1  -4   5  139.29    4.90
   2   4  -6   19.42    1.12
   2   4  -6   19.10    0.97
  -2  -4   6   20.99    1.08
  -2  -4   6   21.37    1.07
   3   4  -7    0.43    0.52
  -3  -4   7    1.03    0.55
  -3  -4   7    1.35    0.46
   4   4  -8    1.33    0.62
  -4  -4   8    1.17    0.58
  -4  -4   8    0.18    0.45
   5   4  -9   20.52    1.35
  -5  -4   9   20.81    1.12
  -5  -4   9   18.83    1.47
   6   4 -10    0.19    0.77
  -6  -4  10    0.73    0.87
  -6  -4  10    1.35    0.57
   7   4 -11    3.79    1.00
  -7  -4  11    2.98    0.65
  -7  -4  11    2.62    0.94
   8   4 -12    3.94    1.06
  -8  -4  12    2.63    1.01
   9   4 -13   -0.49    0.97
  -9  -4  13   -0.58    0.98
  10   4 -14   -1.63    1.02
 -10  -4  14   -0.18    1.09
  11   4 -15    0.61    1.13
 -11  -4  15   -0.93    1.17
  12   4 -16    1.63    1.27
 -12  -4  16    1.29    1.33
 -14   5   9    0.38    1.16
  14  -5  -9   -0.81    1.11
 -13   5   8    0.78    1.09
  13  -5  -8    1.68    1.19
 -12   5   7    0.07    1.01
  12  -5  -7    0.97    1.02
 -11   5   6    1.05    0.96
  11  -5  -6    1.47    0.96
 -10   5   5    0.58    0.84
  10  -5  -5    0.30    0.84
  -9   5   4    0.95    0.82
  -9   5   4    0.90    0.61
   9  -5  -4    1.59    0.87
  -8   5   3    3.83    0.65
   8  -5  -3    2.95    0.86
  -7   5   2   -0.09    0.46
   7  -5  -2    0.47    0.67
  -6   5   1   -0.45    0.45
   6  -5  -1    0.09    0.58
  -5   5   0    3.16    0.54
   5  -5   0    3.10    0.64
  -4   5  -1    8.76    0.69
   4  -5   1    9.08    0.78
  -3   5  -2    0.38    0.46
   3  -5   2    0.32    0.52
  -2   5  -3  152.24    5.38
   2  -5   3  151.08    5.38
  -1   5  -4   73.51    2.77
   1  -5   4   71.85    2.74
   0   5  -5    0.37    0.55
   0  -5   5    0.11    0.40
   0  -5   5    0.41    0.43
   1   5  -6    5.45    0.69
  -1  -5   6    6.98    0.62
  -1  -5   6    6.01    0.53
  -1  -5   6    6.83    0.65
   2   5  -7   12.96    0.99
  -2  -5   7   12.43    0.93
  -2  -5   7   13.50    0.88
   3   5  -8   10.26    0.77
   3   5  -8   12.10    0.98
  -3  -5   8   10.67    0.86
  -3  -5   8   10.33    0.91
   4   5  -9    2.37    0.53
   4   5  -9    1.99    0.70
  -4  -5   9    2.74    0.59
  -4  -5   9    2.66    0.73
   5   5 -10    0.41    0.75
  -5  -5  10    0.33    0.78
  -5  -5  10    0.97    0.57
   6   5 -11    0.58    0.83
  -6  -5  11   -0.18    0.56
  -6  -5  11   -0.15    0.77
   7   5 -12    1.45    0.98
  -7  -5  12    1.28    0.89
  -7  -5  12    1.28    0.65
   8   5 -13    1.76    0.99
  -8  -5  13    0.92    1.00
   9   5 -14    0.89    0.97
  -9  -5  14    2.34    1.07
  10   5 -15    2.17    1.12
 -10  -5  15    1.39    1.23
  11   5 -16    0.88    1.18
 -11  -5  16    0.81    1.26
  12   5 -17   -1.16    1.20
 -12  -5  17   -0.78    1.32
 -14   6   8   -0.20    1.12
  14  -6  -8   -0.22    1.21
 -13   6   7    1.65    1.10
  13  -6  -7   -1.16    1.02
 -12   6   6    1.06    1.05
  12  -6  -6    0.52    1.02
 -11   6   5    0.06    0.88
  11  -6  -5   -1.12    0.97
 -10   6   4    0.20    0.80
  10  -6  -4   -0.20    0.83
  -9   6   3    5.20    0.74
   9  -6  -3    4.64    0.98
  -8   6   2    0.61    0.57
   8  -6  -2    0.56    0.81
  -7   6   1    2.38    0.61
   7  -6  -1    2.31    0.77
  -6   6   0    0.44    0.50
   6  -6   0   -0.04    0.62
  -5   6  -1   14.81    1.03
   5  -6   1   15.27    1.09
  -4   6  -2    6.18    0.66
   4  -6   2    6.20    0.71
  -3   6  -3   46.50    1.92
   3  -6   3   43.77    1.93
  -2   6  -4  118.40    4.35
   2  -6   4  119.89    4.36
  -1   6  -5   16.00    1.09
   1  -6   5   13.16    0.92
   0   6  -6    9.92    0.84
   0  -6   6    9.34    0.78
   0  -6   6   10.35    0.76
   1   6  -7   33.92    1.67
  -1  -6   7   37.14    1.59
  -1  -6   7   34.93    1.53
  -1  -6   7   37.52    1.62
   2   6  -8   32.06    1.59
  -2  -6   8   33.65    1.59
  -2  -6   8   32.09    1.49
   3   6  -9    1.31    0.68
  -3  -6   9    0.42    0.59
  -3  -6   9    0.80    0.53
   4   6 -10    2.75    0.52
   4   6 -10    1.03    0.76
  -4  -6  10    2.39    0.71
  -4  -6  10    3.03    0.64
   5   6 -11    3.06    0.86
   5   6 -11    1.25    0.60
  -5  -6  11    2.30    0.65
  -5  -6  11    2.42    0.90
   6   6 -12    0.69    0.96
   6   6 -12    2.60    0.70
  -6  -6  12    2.10    0.64
  -6  -6  12    2.86    1.01
   7   6 -13    1.83    1.00
  -7  -6  13    1.39    0.94
   8   6 -14    0.09    0.99
  -8  -6  14   -1.23    0.96
   9   6 -15   -0.92    1.00
  -9  -6  15    1.93    1.17
  10   6 -16    0.54    1.06
 -10  -6  16    0.81    1.12
  11   6 -17    2.79    1.26
 -11  -6  17    0.33    1.32
 -14   7   7    0.67    1.18
  14  -7  -7   -0.60    1.23
 -13   7   6    1.52    1.06
  13  -7  -6   -1.31    1.12
 -12   7   5    3.46    1.13
  12  -7  -5    2.99    1.21
 -11   7   4    1.14    0.90
  11  -7  -4    0.37    0.95
 -10   7   3   -0.26    0.75
  10  -7  -3   -0.72    0.85
  -9   7   2    1.02    0.61
   9  -7  -2    0.83    0.88
  -8   7   1    5.04    0.78
   8  -7  -1    6.56    1.02
  -7   7   0    2.14    0.65
   7  -7   0    3.28    0.84
  -6   7  -1   -0.12    0.51
   6  -7   1    1.95    0.71
  -5   7  -2    0.87    0.52
   5  -7   2    0.79    0.63
  -4   7  -3    9.26    0.79
   4  -7   3    9.21    0.88
  -3   7  -4   46.31    2.04
   3  -7   4   48.09    2.02
  -2   7  -5   12.30    0.95
   2  -7   5   10.99    0.89
  -1   7  -6    0.66    0.60
   1  -7   6   -0.11    0.40
   1  -7   6   -0.06    0.55
   0   7  -7   -0.21    0.59
   0  -7   7    0.11    0.46
   0  -7   7    0.54    0.48
   1   7  -8   23.20    1.38
  -1  -7   8   22.35    1.24
  -1  -7   8   22.28    1.15
  -1  -7   8   22.22    1.23
   2   7  -9   10.73    0.99
  -2  -7   9    9.88    0.89
  -2  -7   9    9.47    0.86
   3   7 -10   -0.29    0.70
  -3  -7  10   -1.06    0.54
  -3  -7  10    0.56    0.67
   4   7 -11    0.74    0.83
  -4  -7  11   -0.07    0.74
  -4  -7  11    0.60    0.60
   5   7 -12    9.52    1.17
   5   7 -12   11.72    0.99
  -5  -7  12   12.10    1.01
  -5  -7  12   11.24    1.24
   6   7 -13    3.47    0.66
   6   7 -13    2.52    1.00
  -6  -7  13    4.01    0.76
  -6  -7  13    2.79    0.98
   7   7 -14   -0.90    0.86
  -7  -7  14   -0.82    0.91
   8   7 -15    1.50    1.01
  -8  -7  15   -0.15    1.02
   9   7 -16    3.08    1.16
  -9  -7  16    1.22    1.11
  10   7 -17   -1.08    1.02
 -10  -7  17    0.83    1.26
  11   7 -18    1.25    1.25
 -11  -7  18   -2.27    1.27
 -14   8   6   -1.17    1.01
  14  -8  -6   -0.03    1.26
 -13   8   5    1.25    1.04
  13  -8  -5    0.85    1.20
 -12   8   4    0.40    0.95
  12  -8  -4    3.63    1.23
 -11   8   3    1.31    0.87
  11  -8  -3    0.03    0.96
  10  -8  -2   -0.13    0.91
  -9   8   1    3.27    0.77
   9  -8  -1    3.11    1.00
  -8   8   0    1.72    0.71
   8  -8   0    2.22    0.92
  -7   8  -1    6.09    0.80
   7  -8   1    5.45    0.97
  -6   8  -2    5.89    0.80
   6  -8   2    5.86    0.92
  -5   8  -3    1.22    0.61
   5  -8   3    0.61    0.68
  -4   8  -4    0.57    0.57
   4  -8   4    0.42    0.65
  -3   8  -5   15.04    1.12
   3  -8   5   16.89    1.17
  -2   8  -6    6.61    0.78
   2  -8   6    5.80    0.80
  -1   8  -7   58.78    2.50
   1  -8   7   57.07    2.28
   1  -8   7   59.69    2.43
   0   8  -8   44.17    2.04
   0  -8   8   43.03    1.85
   0  -8   8   43.67    1.92
   1   8  -9    2.40    0.79
  -1  -8   9    3.74    0.58
  -1  -8   9    3.21    0.65
  -1  -8   9    3.76    0.68
   2   8 -10    0.39    0.74
  -2  -8  10   -1.15    0.54
  -2  -8  10    0.09    0.59
   3   8 -11    0.32    0.81
  -3  -8  11    0.03    0.74
  -3  -8  11   -0.34    0.61
   4   8 -12    0.33    0.91
  -4  -8  12    0.76    0.63
  -4  -8  12   -0.72    0.79
   5   8 -13    0.37    0.93
  -5  -8  13    0.73    0.69
  -5  -8  13   -0.22    0.88
   6   8 -14    3.62    1.13
  -6  -8  14    5.77    1.14
   7   8 -15   -0.81    0.95
  -7  -8  15    0.19    1.01
   8   8 -16   -1.11    1.00
  -8  -8  16   -1.25    1.03
   9   8 -17    2.93    1.24
  -9  -8  17    1.25    1.25
  10   8 -18    0.50    1.23
 -10  -8  18   -0.78    1.27
 -14   9   5   -1.50    1.06
  14  -9  -5   -1.18    1.23
 -13   9   4   -0.04    1.02
  13  -9  -4   -0.22    1.18
 -12   9   3    0.70    0.96
  12  -9  -3   -0.29    1.04
 -11   9   2    1.16    0.89
  11  -9  -2    1.59    1.11
  10  -9  -1    1.77    0.99
  -9   9   0    0.51    0.63
   9  -9   0   -0.93    0.88
  -8   9  -1    1.60    0.75
   8  -9   1    0.74    0.91
  -7   9  -2    7.13    0.89
   7  -9   2    7.97    1.07
  -6   9  -3    0.38    0.63
   6  -9   3   -0.93    0.67
  -5   9  -4    6.14    0.83
   5  -9   4    5.73    0.86
  -4   9  -5   -0.50    0.61
   4  -9   5   -0.17    0.61
  -3   9  -6   29.83    1.65
   3  -9   6   26.29    1.56
  -2   9  -7   31.08    1.65
   2  -9   7   31.39    1.66
  -1   9  -8    0.62    0.67
   1  -9   8    0.60    0.64
   1  -9   8   -0.05    0.49
   0   9  -9    9.16    1.02
   0  -9   9    8.91    0.80
   0  -9   9   10.82    0.94
   1   9 -10    1.49    0.83
  -1  -9  10    0.78    0.58
  -1  -9  10    1.42    0.67
  -1  -9  10    1.29    0.57
   2   9 -11    0.99    0.87
  -2  -9  11    0.04    0.69
  -2  -9  11    0.24    0.64
   3   9 -12   -0.15    0.86
  -3  -9  12   -0.36    0.74
  -3  -9  12    0.26    0.69
   4   9 -13    7.79    1.20
  -4  -9  13    7.92    1.11
  -4  -9  13    9.75    1.01
   5   9 -14   -1.10    0.93
  -5  -9  14    0.21    0.87
  -5  -9  14    1.14    0.68
   6   9 -15    1.16    0.99
  -6  -9  15    1.24    0.98
   7   9 -16    0.26    1.02
  -7  -9  16    0.30    1.06
   8   9 -17    1.38    1.16
  -8  -9  17    0.96    1.08
   9   9 -18    0.98    1.16
  -9  -9  18   -1.04    1.18
  10   9 -19    0.09    1.27
 -10  -9  19   -1.52    1.13
 -14  10   4   -0.51    1.05
  14 -10  -4   -1.94    1.24
 -13  10   3    3.17    1.12
  13 -10  -3    2.41    1.25
 -12  10   2    1.64    0.94
  12 -10  -2    1.51    1.18
 -11  10   1    1.17    0.85
  11 -10  -1    1.11    1.07
  10 -10   0    0.79    0.97
  -9  10  -1    0.26    0.67
   9 -10   1    0.66    0.98
  -8  10  -2    8.95    1.02
   8 -10   2    7.19    1.18
  -7  10  -3   -0.24    0.72
   7 -10   3    0.09    0.88
  -6  10  -4    6.35    0.90
   6 -10   4    5.29    1.03
  -5  10  -5    5.67    0.88
   5 -10   5    4.61    0.96
  -4  10  -6    1.03    0.69
   4 -10   6    0.06    0.75
  -3  10  -7   26.81    1.71
   3 -10   7   28.69    1.64
  -2  10  -8   23.10    1.62
   2 -10   8   23.68    1.50
  -1  10  -9   11.05    1.10
   1 -10   9   12.35    1.12
   0  10 -10    4.34    0.95
   0 -10  10    4.89    0.87
   0 -10  10    4.61    0.74
   1  10 -11    4.15    1.01
  -1 -10  11    5.24    0.71
  -1 -10  11    3.96    0.78
  -1 -10  11    3.57    0.85
   2  10 -12   -0.60    0.82
  -2 -10  12    0.57    0.71
  -2 -10  12    0.19    0.69
   3  10 -13    5.17    1.13
  -3 -10  13    4.24    0.83
  -3 -10  13    4.19    0.91
   4  10 -14    0.11    1.03
  -4 -10  14    0.24    0.83
  -4 -10  14    0.91    0.75
   5  10 -15   -1.70    1.00
  -5 -10  15    0.06    0.87
   6  10 -16    1.99    1.07
  -6 -10  16   -0.51    0.92
   7  10 -17   -1.98    1.00
  -7 -10  17    0.14    1.07
   8  10 -18    1.34    1.20
  -8 -10  18    2.18    1.17
   9  10 -19    2.84    1.34
  -9 -10  19   -0.03    1.20
 -14  11   3   -0.10    1.06
  14 -11  -3   -0.46    1.34
 -13  11   2   -0.29    0.94
  13 -11  -2    2.58    1.31
 -12  11   1    1.69    0.92
  12 -11  -1   -0.59    1.18
 -11  11   0    0.92    0.78
  11 -11   0    0.14    1.08
  10 -11   1    0.38    1.03
  -9  11  -2    2.58    0.78
   9 -11   2   -0.05    0.93
  -8  11  -3    1.36    0.74
   8 -11   3   -0.88    0.90
  -7  11  -4    2.35    0.80
   7 -11   4    1.31    0.99
  -6  11  -5    5.39    0.94
   6 -11   5    2.30    0.89
  -5  11  -6    0.46    0.79
   5 -11   6    0.46    0.87
  -4  11  -7    1.43    0.85
   4 -11   7   -1.32    0.77
  -3  11  -8    3.01    0.94
   3 -11   8    3.57    0.91
  -2  11  -9    3.27    0.99
   2 -11   9    1.85    0.84
  -1  11 -10    0.11    0.91
   1 -11  10    2.49    0.79
   0  11 -11    7.82    1.14
   0 -11  11    8.52    1.05
   0 -11  11    7.47    0.90
   1  11 -12    0.62    0.99
  -1 -11  12    0.01    0.73
  -1 -11  12    0.54    0.63
  -1 -11  12   -0.25    0.69
   2  11 -13    6.92    1.20
  -2 -11  13    6.20    0.92
  -2 -11  13    5.32    0.93
   3  11 -14    4.60    1.17
  -3 -11  14    4.70    0.93
  -3 -11  14    4.83    0.89
   4  11 -15   -0.22    0.97
  -4 -11  15   -0.44    0.80
  -4 -11  15   -0.20    0.72
   5  11 -16   -1.18    0.97
  -5 -11  16    0.71    0.91
   6  11 -17    1.58    1.10
  -6 -11  17    0.65    1.02
   7  11 -18    1.92    1.19
  -7 -11  18   -1.58    1.01
   8  11 -19    1.60    1.23
  -8 -11  19    1.04    1.26
   9  11 -20   -0.28    1.24
  -9 -11  20   -0.13    1.24
 -14  12   2    1.35    1.03
  14 -12  -2   -0.87    1.25
 -13  12   1    1.64    0.97
  13 -12  -1    0.54    1.21
 -12  12   0    0.79    0.88
  12 -12   0   -0.87    1.11
 -11  12  -1    0.39    0.72
  11 -12   1    0.54    1.14
 -10  12  -2    0.12    0.73
  10 -12   2    0.61    1.06
  -9  12  -3    0.47    0.74
   9 -12   3    0.50    1.01
  -8  12  -4    1.13    0.81
   8 -12   4    0.63    0.96
  -7  12  -5    0.09    0.76
   7 -12   5   -1.15    0.90
  -6  12  -6    4.63    0.98
   6 -12   6    4.24    1.07
  -5  12  -7    3.78    0.95
   5 -12   7    3.90    1.03
  -4  12  -8   14.95    1.32
   4 -12   8   13.46    1.34
  -3  12  -9    2.18    0.97
   3 -12   9    1.78    0.88
  -2  12 -10   -1.18    0.91
   2 -12  10    0.59    0.84
  -1  12 -11    3.87    1.02
   1 -12  11    3.77    0.96
   0  12 -12    8.54    1.25
   0 -12  12    8.75    1.12
   0 -12  12    9.10    0.97
   0 -12  12    8.75    0.96
   1  12 -13    8.50    1.31
  -1 -12  13    7.88    1.11
  -1 -12  13    8.39    1.00
  -1 -12  13   10.22    0.89
   2  12 -14    1.74    1.08
  -2 -12  14    2.30    0.88
  -2 -12  14    1.49    0.82
   3  12 -15    2.63    1.12
  -3 -12  15    1.45    0.80
  -3 -12  15    0.20    0.83
   4  12 -16    0.67    1.15
  -4 -12  16   -0.37    0.85
   5  12 -17    0.34    1.12
  -5 -12  17   -0.93    0.96
   6  12 -18    1.00    1.13
  -6 -12  18    0.73    1.09
   7  12 -19    1.63    1.20
  -7 -12  19   -1.42    1.00
   8  12 -20    0.76    1.33
  -8 -12  20    1.06    1.27
  13 -13   0    0.69    1.30
  12 -13   1   -0.42    1.18
 -11  13  -2    2.70    0.82
  11 -13   2    3.64    1.29
  10 -13   3    3.56    1.19
  -9  13  -4    1.01    0.81
   9 -13   4   -0.14    1.07
  -8  13  -5    2.07    0.87
   8 -13   5    2.04    0.99
  -7  13  -6    2.42    0.89
   7 -13   6    2.42    1.08
  -6  13  -7   -0.37    0.81
   6 -13   7   -1.20    0.92
  -5  13  -8   -1.20    0.84
   5 -13   8   -0.79    0.93
  -4  13  -9    3.06    1.06
   4 -13   9    5.27    1.02
  -3  13 -10   -0.72    0.87
   3 -13  10    0.04    0.89
  -2  13 -11    9.70    1.34
   2 -13  11    8.93    1.19
  -1  13 -12    2.88    1.13
   1 -13  12    1.84    0.92
   0  13 -13    0.99    0.96
   0 -13  13   -0.70    0.73
   0 -13  13   -0.35    0.73
   0 -13  13    0.70    0.86
   1  13 -14    4.40    1.16
  -1 -13  14    2.53    0.88
  -1 -13  14    1.46    0.79
  -1 -13  14    3.42    0.73
   2  13 -15   -0.31    1.00
  -2 -13  15   -0.24    0.76
  -2 -13  15    1.83    0.82
   3  13 -16   -0.26    1.04
  -3 -13  16    0.48    0.82
  -3 -13  16    1.15    0.88
   4  13 -17   -0.38    1.10
  -4 -13  17    0.66    0.88
   5  13 -18    1.65    1.31
  -5 -13  18   -0.35    0.92
   6  13 -19    0.35    1.20
  -6 -13  19   -0.57    1.03
   7  13 -20   -0.05    1.26
  -7 -13  20   -1.26    1.08
  13 -14   1    0.21    1.39
  12 -14   2    1.19    1.26
  11 -14   3    2.69    1.27
  10 -14   4   -0.13    1.11
  -9  14  -5    1.23    0.88
   9 -14   5    3.40    1.23
  -8  14  -6    1.10    0.83
   8 -14   6    1.23    1.08
  -7  14  -7    3.37    0.98
   7 -14   7    4.38    1.16
  -6  14  -8    2.27    0.96
   6 -14   8    0.39    0.97
  -5  14  -9    0.60    0.94
   5 -14   9    0.96    0.98
  -4  14 -10    1.26    1.00
   4 -14  10   -0.31    0.92
  -3  14 -11    0.91    0.97
   3 -14  11    1.91    0.99
  -2  14 -12    1.89    1.11
   2 -14  12    1.61    0.92
  -1  14 -13    2.88    1.17
   1 -14  13    6.05    1.07
   0  14 -14    1.96    1.02
   0 -14  14    1.17    0.77
   0 -14  14    1.08    0.76
   0 -14  14    0.23    0.85
   1  14 -15   -0.36    1.02
  -1 -14  15   -0.11    0.80
  -1 -14  15    1.53    0.68
  -1 -14  15    0.00    0.81
   2  14 -16   -0.62    1.09
  -2 -14  16   -0.68    0.76
  -2 -14  16    0.38    0.82
   3  14 -17    0.23    1.12
  -3 -14  17   -0.13    0.88
   4  14 -18    0.96    1.21
  -4 -14  18   -0.71    0.93
   5  14 -19   -0.41    1.21
  -5 -14  19    1.05    1.00
   6  14 -20    2.84    1.37
  -6 -14  20    2.01    1.18
   7  14 -21    1.12    1.38
  -7 -14  21   -1.64    1.19
  13 -15   2   -0.27    1.32
  12 -15   3   -2.26    1.17
  11 -15   4    1.14    1.23
  10 -15   5    0.19    1.14
  -9  15  -6   -0.43    0.88
   9 -15   6    2.10    1.22
  -8  15  -7    0.62    0.89
   8 -15   7   -0.33    1.04
  -7  15  -8    0.30    0.89
   7 -15   8   -0.97    0.98
  -6  15  -9    1.19    0.96
   6 -15   9    2.04    1.05
  -5  15 -10    2.09    1.05
   5 -15  10    2.99    1.02
  -4  15 -11    2.81    1.09
   4 -15  11    0.27    0.94
  -3  15 -12    0.72    1.06
   3 -15  12    0.86    0.93
  -2  15 -13    2.53    1.17
   2 -15  13    1.29    0.97
  -1  15 -14    2.71    1.10
   1 -15  14    3.59    1.02
   0  15 -15   -0.76    0.98
   0 -15  15    0.94    0.79
   0 -15  15   -0.24    0.74
   0 -15  15    0.11    0.86
   1  15 -16    0.10    1.04
  -1 -15  16    1.94    0.89
  -1 -15  16    1.56    0.91
   2  15 -17    0.27    1.17
  -2 -15  17    0.14    0.93
   3  15 -18    0.91    1.20
  -3 -15  18   -0.24    0.91
   4  15 -19   -0.14    1.21
  -4 -15  19   -0.03    0.98
   5  15 -20   -0.17    1.25
  -5 -15  20   -0.81    1.02
   6  15 -21    0.22    1.46
  -6 -15  21    1.51    1.20
  12 -16   4    0.92    1.43
  11 -16   5    1.69    1.30
  10 -16   6   -0.09    1.15
  -9  16  -7   -0.18    0.91
   9 -16   7   -0.97    1.12
  -8  16  -8    0.02    0.91
   8 -16   8    1.04    1.13
  -7  16  -9    0.38    0.97
   7 -16   9   -0.07    1.06
  -6  16 -10    1.02    0.99
   6 -16  10    0.87    0.97
  -5  16 -11   -0.40    1.02
   5 -16  11    1.80    1.04
  -4  16 -12    1.89    1.16
   4 -16  12    1.12    1.03
  -3  16 -13    1.76    1.13
   3 -16  13    0.48    0.95
  -2  16 -14    3.15    1.22
   2 -16  14    0.66    0.95
  -1  16 -15    2.02    1.22
   1 -16  15    1.83    0.97
   1 -16  15    2.18    0.87
   0  16 -16    1.56    1.13
   0 -16  16    1.10    0.94
   1  16 -17   -0.62    1.17
  -1 -16  17    1.60    1.01
  -1 -16  17    0.38    0.87
   2  16 -18    1.42    1.21
  -2 -16  18    0.22    0.94
   3  16 -19    0.86    1.27
  -3 -16  19   -0.88    0.93
   4  16 -20   -1.82    1.25
  -4 -16  20    0.95    1.06
   5  16 -21    0.28    1.34
  -5 -16  21    1.05    1.16
  12 -17   5    0.39    1.37
  11 -17   6    1.06    1.33
  10 -17   7    1.80    1.28
  -9  17  -8   -0.05    0.96
   9 -17   8   -0.52    1.03
  -8  17  -9   -0.15    0.92
   8 -17   9   -0.56    1.12
  -7  17 -10    0.69    1.00
   7 -17  10    1.21    1.13
  -6  17 -11    0.73    1.05
   6 -17  11   -0.68    1.05
  -5  17 -12   -1.34    1.03
   5 -17  12   -2.25    0.92
  -4  17 -13   -0.30    1.02
   4 -17  13    1.17    1.06
  -3  17 -14   -0.12    1.12
   3 -17  14   -0.09    1.00
  -2  17 -15    0.63    1.23
   2 -17  15   -0.57    0.93
  -1  17 -16    0.20    1.20
   1 -17  16    0.83    1.03
   0  17 -17   -0.11    1.25
   0 -17  17    2.23    1.05
   1  17 -18   -0.67    1.25
   2  17 -19   -0.96    1.23
   3  17 -20    0.87    1.40
   4  17 -21   -1.34    1.31
  -4 -17  21   -0.93    1.07
  11 -18   7   -0.44    1.31
  10 -18   8    1.35    1.35
  -9  18  -9    0.12    0.98
   9 -18   9   -0.21    1.19
  -8  18 -10    0.44    1.02
   8 -18  10    1.34    1.22
  -7  18 -11    0.04    1.05
   7 -18  11    0.69    1.15
  -6  18 -12    1.05    1.08
   6 -18  12    1.68    1.16
  -5  18 -13   -0.26    1.09
   5 -18  13   -0.72    1.05
  -4  18 -14    2.99    1.32
   4 -18  14   -0.68    1.03
  -3  18 -15   -0.20    1.23
   3 -18  15    0.21    1.02
  -2  18 -16   -0.56    1.19
   2 -18  16   -0.23    0.96
  -1  18 -17   -0.32    1.20
   1 -18  17   -0.56    0.93
   0  18 -18    0.69    1.28
   1  18 -19   -0.14    1.32
   2  18 -20    0.66    1.39
   3  18 -21   -1.47    1.32
  10 -19   9    0.36    1.33
  -9  19 -10   -1.70    0.95
   9 -19  10   -1.52    1.20
  -8  19 -11    1.42    1.14
   8 -19  11    3.04    1.35
  -7  19 -12    0.31    1.15
   7 -19  12    0.93    1.12
  -6  19 -13    1.42    1.18
   6 -19  13    2.36    1.18
  -5  19 -14   -0.30    1.19
   5 -19  14   -1.22    1.00
  -4  19 -15    1.59    1.33
   4 -19  15    0.16    1.11
  -3  19 -16   -0.58    1.26
   3 -19  16    0.42    1.06
  -2  19 -17    0.35    1.27
   2 -19  17   -1.48    0.92
  -1  19 -18    0.78    1.21
   0  19 -19    1.94    1.40
   1  19 -20   -1.14    1.42
   9 -20  11    0.77    1.22
  -8  20 -12   -0.14    1.16
   8 -20  12   -1.08    1.17
  -7  20 -13   -1.08    1.14
   7 -20  13    0.90    1.16
  -6  20 -14    2.53    1.30
   6 -20  14    0.30    1.16
  -5  20 -15    0.49    1.18
   5 -20  15    0.15    1.15
  -4  20 -16   -0.14    1.33
   4 -20  16    1.07    1.14
  -3  20 -17   -1.16    1.33
   3 -20  17   -0.87    1.09
  -2  20 -18    3.12    1.48
   2 -20  18    0.51    1.11
  -1  20 -19   -1.86    1.37
   0  20 -20    1.54    1.50
   7 -21  14    1.03    1.27
  -6  21 -15   -0.43    1.22
   6 -21  15    1.39    1.26
  -5  21 -16   -0.63    1.31
   5 -21  16   -1.69    1.09
  -4  21 -17    1.35    1.32
   4 -21  17    0.71    1.17
  -3  21 -18   -1.84    1.38
   3 -21  18    0.66    1.10
  -2  21 -18   -1.07    1.36
   3 -21  17    3.20    1.23
  -3  21 -17   -1.57    1.36
   4 -21  16    1.85    1.20
  -4  21 -16    0.91    1.36
   5 -21  15    2.06    1.22
  -5  21 -15    1.31    1.31
   6 -21  14    0.03    1.15
  -6  21 -14    0.67    1.22
   7 -21  13   -1.24    1.17
  -7  21 -13    1.97    1.28
   1  20 -20   -1.19    1.39
   0  20 -19    1.72    1.47
  -1  20 -18   -0.11    1.26
   2 -20  17   -0.28    1.09
  -2  20 -17   -1.74    1.24
   3 -20  16   -1.76    0.98
  -3  20 -16   -0.19    1.34
   4 -20  15    0.95    1.10
  -4  20 -15   -0.90    1.24
   5 -20  14   -1.68    1.03
  -5  20 -14   -1.16    1.14
   6 -20  13    0.88    1.22
  -6  20 -13    0.32    1.15
   7 -20  12    2.86    1.30
  -7  20 -12   -2.02    1.05
   8 -20  11   -0.98    1.04
  -8  20 -11   -0.90    1.06
   9 -20  10    1.45    1.41
  -9  20 -10   -0.24    1.06
   2  19 -20   -0.23    1.39
   1  19 -19    0.59    1.41
   0  19 -18    3.07    1.47
  -1  19 -17    0.75    1.37
   2 -19  16   -0.65    0.98
  -2  19 -16   -1.56    1.07
   3 -19  15    0.95    1.07
  -3  19 -15   -0.45    1.20
   4 -19  14    1.09    1.09
  -4  19 -14    2.30    1.27
   5 -19  13    0.28    1.10
  -5  19 -13    1.76    1.23
   6 -19  12   -0.02    1.12
  -6  19 -12    2.42    1.20
   7 -19  11   -0.63    1.13
  -7  19 -11    1.07    1.15
   8 -19  10   -1.48    1.15
  -8  19 -10   -1.14    1.01
   9 -19   9    0.35    1.28
  -9  19  -9    0.01    1.01
  10 -19   8   -1.36    1.23
   3  18 -20    0.53    1.43
   2  18 -19   -1.30    1.25
   1  18 -18   -0.90    1.27
   0  18 -17    0.88    1.28
   1 -18  16   -0.95    0.96
  -1  18 -16   -0.21    1.23
   2 -18  15    0.50    1.01
  -2  18 -15   -1.86    1.12
   3 -18  14    0.09    1.02
  -3  18 -14    0.08    1.19
   4 -18  13    0.28    1.04
  -4  18 -13    1.08    1.09
   5 -18  12    0.58    1.09
  -5  18 -12    0.93    1.13
   6 -18  11    1.45    1.13
  -6  18 -11    0.73    1.09
   7 -18  10   -0.78    1.12
  -7  18 -10   -1.36    0.96
   8 -18   9    0.75    1.15
  -8  18  -9    2.32    1.06
   9 -18   8    0.85    1.26
  -9  18  -8   -2.32    0.97
  10 -18   7   -1.34    1.19
  11 -18   6    0.10    1.33
  -5 -17  21   -0.92    1.17
  -4 -17  20    0.36    1.10
   4  17 -20   -0.07    1.35
  -3 -17  19   -1.32    0.96
   3  17 -19    0.36    1.25
  -2 -17  18   -0.31    0.94
   2  17 -18   -0.78    1.19
  -1 -17  17   -1.45    0.90
   1  17 -17   -0.36    1.20
   0 -17  16    1.00    0.95
   0  17 -16    0.09    1.19
   1 -17  15   -1.30    0.86
  -1  17 -15    1.52    1.22
   2 -17  14    1.27    0.98
  -2  17 -14   -0.62    1.15
   3 -17  13    0.27    0.99
  -3  17 -13   -0.58    1.10
   4 -17  12    0.18    0.99
  -4  17 -12    0.21    1.08
   5 -17  11   -0.92    0.97
  -5  17 -11   -1.91    0.96
   6 -17  10   -1.53    1.00
  -6  17 -10   -0.88    0.96
   7 -17   9    2.91    1.20
  -7  17  -9    0.37    0.90
   8 -17   8    2.19    1.22
  -8  17  -8    1.12    0.97
   9 -17   7    0.68    1.25
  -9  17  -7   -0.21    0.93
  10 -17   6    0.37    1.22
  11 -17   5    0.93    1.34
  12 -17   4   -1.93    1.31
  -5 -16  20   -0.54    1.09
   5  16 -20    2.59    1.44
  -4 -16  19   -1.69    0.92
   4  16 -19    1.70    1.25
  -3 -16  18    0.47    0.98
   3  16 -18    0.04    1.16
  -2 -16  17    0.46    0.96
   2  16 -17   -1.55    1.13
  -1 -16  16   -0.11    0.83
  -1 -16  16   -0.25    0.84
   1  16 -16    0.53    1.19
   0 -16  15    1.42    0.92
   0  16 -15    2.76    1.17
   1 -16  14    1.79    0.92
  -1  16 -14   -0.64    1.08
   2 -16  13    1.06    0.98
  -2  16 -13    1.92    1.15
   3 -16  12    1.36    0.99
  -3  16 -12    2.11    1.15
   4 -16  11    2.00    1.00
  -4  16 -11    0.81    1.05
   5 -16  10   -0.05    0.96
  -5  16 -10    0.28    0.91
   6 -16   9    1.54    0.99
  -6  16  -9    1.50    0.99
   7 -16   8    2.89    1.17
  -7  16  -8    2.08    1.02
   8 -16   7    0.92    1.13
  -8  16  -7    1.34    0.92
   9 -16   6    1.08    1.19
  -9  16  -6    0.94    0.95
  10 -16   5   -0.85    1.17
  11 -16   4    0.07    1.30
  12 -16   3    1.32    1.41
  -6 -15  20   -0.59    1.14
   6  15 -20    0.76    1.40
  -5 -15  19    0.08    1.01
   5  15 -19    0.34    1.25
  -4 -15  18   -0.43    0.98
   4  15 -18    2.59    1.25
  -3 -15  17   -0.44    0.91
   3  15 -17   -1.13    1.08
  -2 -15  16    0.26    0.87
   2  15 -16   -0.79    1.06
  -1 -15  15    0.97    0.83
  -1 -15  15    0.84    0.88
   1  15 -15    0.98    1.09
   0 -15  14    5.98    0.91
   0 -15  14    7.31    1.11
   0  15 -14    3.17    1.23
   1 -15  13    0.81    0.88
  -1  15 -13   -0.23    1.05
   2 -15  12    0.47    0.88
  -2  15 -12    1.33    1.01
   3 -15  11    1.10    0.96
  -3  15 -11    0.15    0.93
   4 -15  10    5.41    1.13
  -4  15 -10    1.76    1.06
   5 -15   9    8.26    1.27
  -5  15  -9    6.45    1.16
   6 -15   8   -0.10    0.97
  -6  15  -8    1.67    0.97
   7 -15   7   -0.32    1.02
  -7  15  -7    1.57    0.92
   8 -15   6   -0.02    1.06
  -8  15  -6    0.61    0.87
   9 -15   5    2.55    1.22
  -9  15  -5    2.11    0.96
  10 -15   4    1.20    1.19
 -10  15  -4   -0.05    0.85
  11 -15   3   -0.82    1.19
  12 -15   2   -1.15    1.27
  13 -15   1    0.20    1.35
  -7 -14  20   -1.17    1.18
   7  14 -20    1.01    1.40
  -6 -14  19   -0.45    1.02
   6  14 -19    0.67    1.31
  -5 -14  18   -0.50    1.00
   5  14 -18    0.52    1.25
  -4 -14  17   -0.88    0.86
   4  14 -17   -0.04    1.12
  -3 -14  16   -0.13    0.88
   3  14 -16    1.07    1.09
  -2 -14  15    0.14    0.77
  -2 -14  15    0.54    0.80
   2  14 -15    0.54    1.03
  -1 -14  14    1.75    0.83
  -1 -14  14    1.49    0.88
  -1 -14  14    0.84    0.63
   1  14 -14   -0.25    1.04
   0 -14  13    0.37    0.77
   0 -14  13    1.77    0.76
   0 -14  13    0.87    0.84
   0  14 -13    1.16    1.08
   1 -14  12    0.70    0.86
  -1  14 -12    1.62    1.09
   2 -14  11    2.48    0.88
  -2  14 -11    3.32    1.14
   3 -14  10    0.76    0.92
  -3  14 -10    0.39    0.93
   4 -14   9    2.57    1.02
  -4  14  -9    3.71    1.07
   5 -14   8    1.29    0.97
  -5  14  -8    2.82    0.97
   6 -14   7    0.17    0.97
  -6  14  -7    0.17    0.85
   7 -14   6    0.33    1.00
  -7  14  -6    0.85    0.82
   8 -14   5    2.05    1.11
  -8  14  -5   -0.61    0.77
   9 -14   4    1.95    1.12
  -9  14  -4    1.44    0.86
  10 -14   3    0.44    1.13
 -10  14  -3   -1.52    0.75
  11 -14   2   -2.09    1.11
  12 -14   1   -1.82    1.18
  13 -14   0    2.12    1.45
  -8 -13  20   -0.66    1.19
   8  13 -20   -0.81    1.21
  -7 -13  19   -0.54    1.09
   7  13 -19   -1.38    1.26
  -6 -13  18    0.71    1.05
   6  13 -18   -1.36    1.19
  -5 -13  17    0.03    0.92
   5  13 -17    1.18    1.21
  -4 -13  16   -1.52    0.88
   4  13 -16    0.35    1.11
  -3 -13  15   -0.76    0.72
  -3 -13  15    0.25    0.87
   3  13 -15   -0.69    1.06
  -2 -13  14   -0.07    0.81
  -2 -13  14   -0.19    0.78
   2  13 -14    0.70    1.04
  -1 -13  13    8.86    1.10
  -1 -13  13    5.25    0.97
  -1 -13  13    8.82    0.84
   1  13 -13    8.05    1.25
   0 -13  12    5.26    0.90
   0 -13  12    5.52    1.02
   0  13 -12    3.51    1.06
   1 -13  11    6.46    1.04
  -1  13 -11    7.13    1.23
   2 -13  10    2.39    0.95
  -2  13 -10    3.94    1.13
   3 -13   9    3.37    0.98
  -3  13  -9    4.74    1.11
   4 -13   8   -0.30    0.89
  -4  13  -8    1.20    0.86
   5 -13   7   11.88    1.33
  -5  13  -7   11.82    1.29
   6 -13   6   -0.11    0.87
  -6  13  -6    0.94    0.88
   7 -13   5    0.13    0.87
  -7  13  -5    0.26    0.78
   8 -13   4    0.85    1.05
  -8  13  -4    1.91    0.82
   9 -13   3    1.27    1.05
  -9  13  -3   -0.19    0.76
  10 -13   2    0.14    1.09
 -10  13  -2   -0.88    0.79
  11 -13   1    1.80    1.20
  12 -13   0   -0.16    1.20
 -12  13   0    0.37    0.82
  13 -13  -1    0.29    1.25
 -13  13   1   -0.90    0.91
  -9 -12  20    1.21    1.36
   9  12 -20    2.06    1.33
  -8 -12  19    1.38    1.21
   8  12 -19    0.78    1.26
  -7 -12  18   -0.71    1.06
   7  12 -18    1.10    1.21
  -6 -12  17   -0.99    1.04
   6  12 -17   -0.82    1.04
  -5 -12  16    2.44    1.03
   5  12 -16    0.57    1.07
  -4 -12  15    0.20    0.87
   4  12 -15    0.61    1.05
  -3 -12  14    0.31    0.74
  -3 -12  14    0.94    0.86
   3  12 -14    0.77    1.03
  -2 -12  13    0.04    0.81
  -2 -12  13    0.22    0.75
   2  12 -13    0.19    1.00
  -1 -12  12    5.31    0.96
  -1 -12  12    1.99    0.83
  -1 -12  12    5.37    0.73
   1  12 -12    3.38    1.08
   0 -12  11    8.62    1.00
   0 -12  11    9.92    1.14
   0  12 -11    9.52    1.26
   1 -12  10    3.06    0.88
  -1  12 -10    2.06    0.94
   2 -12   9   12.49    1.24
  -2  12  -9   11.54    1.31
   3 -12   8    4.84    0.99
  -3  12  -8    4.75    1.04
   4 -12   7    0.61    0.86
  -4  12  -7   -0.16    0.85
   5 -12   6    5.15    1.06
  -5  12  -6    5.32    0.97
   6 -12   5    4.39    1.08
  -6  12  -5    5.14    0.91
   7 -12   4    5.38    1.13
  -7  12  -4    5.25    0.96
   8 -12   3   -0.42    0.94
  -8  12  -3    0.96    0.76
   9 -12   2    0.69    0.91
  -9  12  -2    0.36    0.79
  10 -12   1    0.62    1.10
 -10  12  -1    1.48    0.80
  11 -12   0    1.67    1.20
  12 -12  -1    1.89    1.21
 -12  12   1    0.76    0.88
  13 -12  -2   -0.96    1.15
 -13  12   2    0.67    0.96
 -14  12   3   -0.25    1.06
  -9 -11  19    1.57    1.28
   9  11 -19    1.02    1.28
  -8 -11  18   -0.81    1.13
   8  11 -18   -0.30    1.11
  -7 -11  17    0.49    1.09
   7  11 -17    1.02    1.19
  -6 -11  16   -0.42    0.98
   6  11 -16   -0.18    1.05
  -5 -11  15    0.92    0.96
   5  11 -15    0.64    1.03
  -4 -11  14    0.34    0.84
  -4 -11  14    0.68    0.71
   4  11 -14   -0.94    0.97
  -3 -11  13    2.39    0.83
  -3 -11  13    4.10    0.92
   3  11 -13    2.78    1.08
  -2 -11  12    6.04    0.92
  -2 -11  12    4.97    0.90
   2  11 -12    3.31    1.06
  -1 -11  11    8.28    0.79
  -1 -11  11    9.17    1.04
  -1 -11  11    7.95    0.96
   1  11 -11    8.94    1.19
   0 -11  10   -0.13    0.72
   0 -11  10    2.08    0.73
   0  11 -10    1.55    0.83
   1 -11   9   14.56    1.23
  -1  11  -9   14.58    1.28
   2 -11   8    0.34    0.74
  -2  11  -8    1.86    0.83
   3 -11   7    2.13    0.82
  -3  11  -7    0.75    0.85
   4 -11   6    2.81    0.89
  -4  11  -6    3.52    0.89
   5 -11   5    1.41    0.81
  -5  11  -5    1.45    0.78
   6 -11   4   -0.47    0.88
  -6  11  -4    1.02    0.75
   7 -11   3    0.54    0.96
  -7  11  -3    2.91    0.82
   8 -11   2    0.15    0.95
  -8  11  -2    0.47    0.73
   9 -11   1    0.54    0.99
  -9  11  -1    0.78    0.75
  10 -11   0    0.68    1.02
 -10  11   0   -0.26    0.73
  11 -11  -1   -0.15    1.13
  12 -11  -2    6.59    1.34
 -12  11   2    5.55    1.10
  13 -11  -3    1.49    1.28
 -13  11   3    0.60    0.94
  14 -11  -4   -1.32    1.34
 -14  11   4   -1.42    1.04
 -10 -10  19   -0.43    1.36
  10  10 -19   -0.44    1.23
  -9 -10  18    1.65    1.30
   9  10 -18    0.47    1.12
  -8 -10  17   -0.84    1.11
   8  10 -17    0.23    1.12
  -7 -10  16   -2.26    0.98
   7  10 -16    0.36    1.09
  -6 -10  15    0.17    0.99
   6  10 -15   -0.14    0.95
  -5 -10  14    0.86    0.92
   5  10 -14    1.70    0.99
  -4 -10  13   15.81    1.22
  -4 -10  13   16.52    1.42
   4  10 -13   14.50    1.41
  -3 -10  12    4.91    0.93
  -3 -10  12    5.31    0.83
   3  10 -12    5.74    1.12
  -2 -10  11    7.21    0.97
  -2 -10  11    8.51    0.97
   2  10 -11    9.99    1.19
  -1 -10  10   10.48    0.80
  -1 -10  10    9.79    1.01
  -1 -10  10   10.05    0.96
   1  10 -10    9.59    1.13
   0 -10   9    0.89    0.68
   0 -10   9   -0.19    0.60
   0  10  -9    2.07    0.82
   1 -10   8    0.15    0.66
  -1  10  -8   -0.52    0.76
   2 -10   7    0.61    0.70
  -2  10  -7    0.57    0.76
   3 -10   6   22.05    1.44
  -3  10  -6   20.39    1.51
   4 -10   5    6.83    0.90
  -4  10  -5    6.64    0.85
   5 -10   4    0.20    0.78
  -5  10  -4   -0.76    0.67
   6 -10   3    1.24    0.93
  -6  10  -3    1.92    0.69
   7 -10   2   -0.45    0.89
  -7  10  -2   -0.15    0.67
   8 -10   1    0.85    0.85
  -8  10  -1    1.32    0.75
   9 -10   0    0.14    0.97
  -9  10   0    0.06    0.65
  10 -10  -1   -0.20    0.94
 -10  10   1    0.15    0.68
  11 -10  -2    0.49    1.11
  12 -10  -3    0.57    1.16
 -12  10   3    1.02    0.95
  13 -10  -4   -0.86    1.14
 -13  10   4   -0.76    1.01
  14 -10  -5    1.75    1.31
 -14  10   5    1.73    1.13
 -10  -9  18   -0.29    1.30
  10   9 -18    1.31    1.22
  -9  -9  17    0.99    1.21
   9   9 -17    0.54    1.14
  -8  -9  16   -0.76    1.06
   8   9 -16    1.45    1.06
  -7  -9  15    0.13    1.03
   7   9 -15    0.18    1.03
  -6  -9  14    0.21    0.93
   6   9 -14    1.32    0.93
  -5  -9  13   11.78    1.02
  -5  -9  13   10.45    1.29
   5   9 -13   10.97    1.25
  -4  -9  12    3.84    0.76
  -4  -9  12    2.46    0.90
   4   9 -12    3.16    1.03
  -3  -9  11    2.44    0.71
  -3  -9  11    0.77    0.77
   3   9 -11    2.02    0.87
  -2  -9  10    3.20    0.72
  -2  -9  10    1.18    0.71
   2   9 -10    2.24    0.88
  -1  -9   9    6.04    0.62
  -1  -9   9    5.31    0.78
  -1  -9   9    5.16    0.75
   1   9  -9    4.54    0.87
   0  -9   8    1.18    0.58
   0  -9   8    2.47    0.66
   0   9  -8    1.52    0.72
   1  -9   7   71.17    2.87
  -1   9  -7   71.88    2.97
   2  -9   6    3.82    0.74
  -2   9  -6    2.83    0.76
   3  -9   5   -0.13    0.63
  -3   9  -5   -0.04    0.63
   4  -9   4   33.46    1.76
  -4   9  -4   34.92    1.73
   5  -9   3    0.69    0.74
  -5   9  -3   -0.39    0.60
   6  -9   2    0.24    0.79
  -6   9  -2    0.42    0.62
   7  -9   1   -0.84    0.81
  -7   9  -1   -0.19    0.64
   8  -9   0   -0.37    0.91
  -8   9   0    2.66    0.76
   9  -9  -1    0.84    0.94
  -9   9   1    0.27    0.64
  10  -9  -2    0.30    0.96
 -10   9   2    0.18    0.60
  11  -9  -3    0.19    0.95
  12  -9  -4    0.15    1.08
 -12   9   4    0.60    1.00
  13  -9  -5    1.47    1.23
 -13   9   5    1.17    1.03
  14  -9  -6   -0.89    1.26
 -14   9   6   -0.19    1.07
 -11  -8  18   -0.83    1.16
  11   8 -18    0.43    1.23
 -10  -8  17    0.67    1.17
  10   8 -17    1.27    1.19
  -9  -8  16   -0.64    1.15
   9   8 -16    0.44    1.01
  -8  -8  15    2.33    1.16
   8   8 -15   -0.52    0.93
  -7  -8  14    0.32    1.01
   7   8 -14    1.69    1.00
  -6  -8  13    1.96    1.01
   6   8 -13    1.33    0.95
  -5  -8  12    2.31    0.87
  -5  -8  12    2.60    0.67
   5   8 -12    3.30    1.00
  -4  -8  11   14.67    1.32
  -4  -8  11   18.29    1.18
   4   8 -11   17.28    1.37
  -3  -8  10    1.42    0.72
  -3  -8  10    0.84    0.60
   3   8 -10    0.38    0.76
  -2  -8   9    0.22    0.57
  -2  -8   9    0.22    0.63
   2   8  -9    0.13    0.70
  -1  -8   8   33.74    1.57
  -1  -8   8   32.29    1.57
  -1  -8   8   31.99    1.45
   1   8  -8   33.38    1.69
   0  -8   7   -0.67    0.53
   0  -8   7   -0.01    0.50
   0   8  -7    0.25    0.62
   1  -8   6  402.43   13.92
  -1   8  -6  402.60   13.93
   2  -8   5   39.44    1.85
  -2   8  -5   41.82    1.90
   3  -8   4    4.31    0.70
  -3   8  -4    5.96    0.76
   4  -8   3    2.03    0.69
  -4   8  -3    2.99    0.64
   5  -8   2    4.53    0.75
  -5   8  -2    4.53    0.70
   6  -8   1    0.28    0.76
  -6   8  -1    2.03    0.64
   7  -8   0    0.15    0.80
  -7   8   0   -0.52    0.61
   8  -8  -1    1.46    0.91
  -8   8   1    2.32    0.68
   9  -8  -2    0.69    0.93
  -9   8   2    1.36    0.64
  10  -8  -3   -0.44    0.94
 -10   8   3    0.19    0.62
  11  -8  -4   -0.05    0.98
 -11   8   4    1.05    0.86
  12  -8  -5    3.22    1.18
 -12   8   5    0.47    0.97
  13  -8  -6   -0.33    1.13
 -13   8   6    0.83    1.04
  14  -8  -7    0.02    1.30
 -14   8   7    0.18    1.09
 -11  -7  17   -1.03    1.17
  11   7 -17    0.14    1.14
 -10  -7  16    1.38    1.28
  10   7 -16    1.18    1.10
  -9  -7  15   -0.18    1.05
   9   7 -15   -0.87    1.02
  -8  -7  14    0.89    1.11
   8   7 -14    1.92    1.00
  -7  -7  13    1.12    0.91
   7   7 -13   -0.97    0.88
  -6  -7  12    0.67    0.59
  -6  -7  12    1.08    0.98
   6   7 -12    0.53    0.88
   6   7 -12    0.28    0.52
  -5  -7  11    5.61    0.75
  -5  -7  11    3.81    0.99
   5   7 -11    4.17    0.98
   5   7 -11    4.47    0.53
  -4  -7  10    2.54    0.62
  -4  -7  10    3.02    0.85
   4   7 -10    4.87    0.90
  -3  -7   9   -0.46    0.50
  -3  -7   9    0.50    0.64
   3   7  -9    0.31    0.65
  -2  -7   8    0.01    0.50
  -2  -7   8    0.27    0.56
   2   7  -8    1.24    0.63
  -1  -7   7   -0.10    0.47
  -1  -7   7    0.38    0.42
  -1  -7   7    0.87    0.50
   1   7  -7    0.95    0.63
   0  -7   6   12.06    0.88
   0  -7   6    9.93    0.84
   0   7  -6   11.77    0.91
   1  -7   5    0.88    0.54
  -1   7  -5    0.00    0.50
   2  -7   4   39.36    1.75
  -2   7  -4   37.85    1.72
   3  -7   3   16.19    1.11
  -3   7  -3   18.56    1.13
   4  -7   2    4.23    0.68
  -4   7  -2    4.02    0.64
   5  -7   1    0.99    0.65
  -5   7  -1    1.70    0.55
   6  -7   0    2.54    0.74
  -6   7   0    3.91    0.66
   7  -7  -1    0.23    0.77
  -7   7   1   -0.19    0.56
   8  -7  -2    0.63    0.85
  -8   7   2   -1.10    0.56
   9  -7  -3    1.82    0.93
  -9   7   3    1.99    0.68
  10  -7  -4   -0.53    0.87
  11  -7  -5   -1.60    0.92
 -11   7   5    0.80    0.90
  12  -7  -6    1.47    1.14
 -12   7   6    1.36    1.02
  13  -7  -7    0.65    1.13
 -13   7   7    0.68    1.08
  14  -7  -8    0.49    1.32
 -14   7   8    0.96    1.18
 -12  -6  17   -0.63    1.38
  12   6 -17    0.25    1.21
 -11  -6  16    2.33    1.38
  11   6 -16    2.12    1.17
 -10  -6  15   -0.96    1.14
  10   6 -15   -1.25    1.00
  -9  -6  14    0.57    1.11
   9   6 -14    0.19    1.01
  -8  -6  13    1.20    1.03
   8   6 -13    3.06    0.97
  -7  -6  12    8.64    1.27
   7   6 -12    6.60    1.11
  -6  -6  11    0.58    0.55
  -6  -6  11   -0.65    0.86
   6   6 -11    1.60    0.90
  -5  -6  10    4.11    0.63
  -5  -6  10    3.05    0.89
   5   6 -10    2.64    0.54
   5   6 -10    4.02    0.82
  -4  -6   9    3.15    0.74
  -4  -6   9    2.94    0.58
   4   6  -9    2.74    0.73
   4   6  -9    3.82    0.45
  -3  -6   8    9.09    0.91
  -3  -6   8   11.10    0.83
   3   6  -8   10.88    0.90
  -2  -6   7    3.41    0.64
  -2  -6   7    4.15    0.56
  -1  -6   6   39.83    1.69
  -1  -6   6   41.29    1.78
   1   6  -6   39.09    1.76
   0  -6   5   64.51    2.49
   0  -6   5   64.81    2.48
   0   6  -5   64.65    2.53
   1  -6   4   94.98    3.54
  -1   6  -4   97.31    3.57
   2  -6   3   23.61    1.24
  -2   6  -3   22.27    1.26
   3  -6   2    0.73    0.55
  -3   6  -2    1.73    0.47
   4  -6   1    8.87    0.82
  -4   6  -1    7.94    0.72
   5  -6   0    0.63    0.62
  -5   6   0    1.65    0.53
   6  -6  -1   -0.28    0.63
  -6   6   1    0.24    0.50
   7  -6  -2   -0.59    0.71
  -7   6   2   -0.46    0.52
   8  -6  -3    1.29    0.86
  -8   6   3    0.85    0.60
   9  -6  -4    0.62    0.86
  -9   6   4    1.82    0.65
  10  -6  -5   -0.44    0.88
  11  -6  -6   -1.82    0.89
 -11   6   6    0.89    0.93
  12  -6  -7    1.53    1.09
 -12   6   7    0.64    1.01
  13  -6  -8    2.21    1.22
 -13   6   8   -0.63    1.06
  14  -6  -9   -0.97    1.21
 -14   6   9    0.53    1.16
 -12  -5  16   -0.22    1.36
  12   5 -16    0.49    1.17
 -11  -5  15    0.90    1.26
  11   5 -15    1.28    1.12
 -10  -5  14    1.74    1.16
  10   5 -14   -0.69    0.99
  -9  -5  13    1.20    1.12
   9   5 -13   -0.31    0.89
  -8  -5  12    3.91    1.15
   8   5 -12    5.04    1.06
  -7  -5  11    0.86    0.98
   7   5 -11    1.85    0.91
  -6  -5  10    5.43    1.02
  -6  -5  10    8.29    0.77
   6   5 -10    7.47    1.00
  -5  -5   9    0.56    0.76
  -5  -5   9    0.18    0.48
   5   5  -9    0.56    0.70
  -4  -5   8   94.81    3.74
  -4  -5   8   94.89    3.48
   4   5  -8   92.17    3.55
  -3  -5   7   10.94    0.77
  -3  -5   7    8.68    0.82
   3   5  -7   10.01    0.63
   3   5  -7    9.72    0.81
  -2  -5   6   38.54    1.62
  -2  -5   6   40.10    1.79
   2   5  -6   42.20    1.74
  -1  -5   5  145.26    5.11
  -1  -5   5  143.77    5.26
   1   5  -5  145.00    5.14
   0  -5   4   50.74    1.99
   0  -5   4   51.98    2.02
   0   5  -4   50.56    2.03
   1  -5   3   19.61    1.06
  -1   5  -3   20.33    1.12
   2  -5   2   25.96    1.27
  -2   5  -2   26.57    1.30
  -3   5  -1   12.94    0.92
   4  -5   0   -0.31    0.52
  -4   5   0    0.69    0.44
   5  -5  -1    9.37    0.85
  -5   5   1   10.43    0.87
   6  -5  -2    4.55    0.75
  -6   5   2    5.21    0.66
   7  -5  -3    4.61    0.84
  -7   5   3    6.26    0.70
   8  -5  -4   -0.26    0.81
  -8   5   4    0.22    0.58
   9  -5  -5    0.07    0.87
  -9   5   5    0.00    0.57
  10  -5  -6    4.04    1.06
 -10   5   6    2.27    0.94
  11  -5  -7    1.51    0.99
 -11   5   7    1.76    1.00
  12  -5  -8    1.01    1.07
 -12   5   8    1.25    1.05
  13  -5  -9    1.80    1.15
 -13   5   9    0.01    1.13
  14  -5 -10    3.26    1.38
 -14   5  10    0.11    1.17
 -12  -4  15   -0.29    1.29
  12   4 -15    0.16    1.13
 -11  -4  14    0.42    1.18
  11   4 -14   -0.05    1.03
 -10  -4  13    0.67    1.10
  10   4 -13   -1.38    0.96
  -9  -4  12   -0.65    0.97
   9   4 -12    0.25    0.90
  -8  -4  11   -1.64    0.91
   8   4 -11    2.00    0.96
  -7  -4  10    4.02    1.04
  -7  -4  10    5.15    0.66
   7   4 -10    5.19    0.92
  -6  -4   9   16.43    1.02
  -6  -4   9   15.92    1.40
   6   4  -9   16.97    1.29
  -5  -4   8   -0.03    0.68
  -5  -4   8    0.55    0.45
   5   4  -8    0.03    0.63
  -4  -4   7   31.68    1.65
  -4  -4   7   34.97    1.45
   4   4  -7   32.19    1.53
  -3  -4   6   10.75    0.74
  -3  -4   6   11.97    0.98
   3   4  -6   11.80    0.83
   3   4  -6   11.42    0.81
  -2  -4   5  288.23   10.04
  -2  -4   5  287.46   10.39
   2   4  -5  296.33   10.06
   2   4  -5  298.91   10.07
  -1  -4   4   24.45    1.12
  -1  -4   4   26.38    1.21
  -1  -4   4   25.05    1.04
   1   4  -4   26.26    1.22
   1   4  -4   27.39    1.16
   0  -4   3  496.48   17.20
   0  -4   3  498.95   16.77
   0   4  -3  496.82   16.76
   0   4  -3  479.90   16.76
   1  -4   2   30.90    1.31
  -1   4  -2   30.99    1.29
   2  -4   1   43.22    1.70
  -2   4  -1   42.16    1.71
   3  -4   0   28.17    1.26
  -3   4   0   26.34    1.28
   4  -4  -1    4.64    0.64
  -4   4   1    5.15    0.56
   5  -4  -2   11.62    0.97
  -5   4   2   13.61    0.94
   6  -4  -3    1.16    0.61
  -6   4   3   -0.30    0.46
   7  -4  -4    4.15    0.80
  -7   4   4    3.66    0.64
   8  -4  -5    1.63    0.85
  -8   4   5    3.36    0.65
   9  -4  -6    6.05    1.05
  -9   4   6    6.58    0.76
  10  -4  -7    1.64    0.94
 -10   4   7   -0.22    0.85
  11  -4  -8    0.26    0.96
 -11   4   8    0.69    0.99
  12  -4  -9    1.08    1.12
 -12   4   9    1.33    1.10
  13  -4 -10    0.38    1.12
 -13   4  10   -0.03    1.01
  14  -4 -11   -1.21    1.25
 -14   4  11    0.73    1.22
 -13  -3  15    0.95    1.38
  13   3 -15   -0.18    1.20
 -12  -3  14    0.34    1.23
  12   3 -14    1.10    1.12
 -11  -3  13    1.45    1.09
  11   3 -13   -0.33    1.02
 -10  -3  12    0.60    1.01
  10   3 -12   -0.19    0.92
  -9  -3  11    0.70    0.99
   9   3 -11   -0.55    0.85
  -8  -3  10    2.73    0.95
   8   3 -10    1.30    0.89
  -7  -3   9    1.33    0.86
  -7  -3   9    0.51    0.46
   7   3  -9    0.59    0.80
  -6  -3   8   19.99    1.49
  -6  -3   8   23.61    1.13
   6   3  -8   21.08    1.34
  -5  -3   7   14.02    0.81
  -5  -3   7   11.01    1.06
   5   3  -7   12.53    0.98
  -4  -3   6   75.02    3.16
  -4  -3   6   81.50    2.89
   4   3  -6   78.98    2.95
   4   3  -6   80.07    2.94
  -3  -3   5    7.56    0.55
  -3  -3   5    6.00    0.66
   3   3  -5    5.55    0.56
   3   3  -5    7.57    0.59
   3   3  -5    6.71    0.63
  -2  -3   4  154.37    5.22
  -2  -3   4  147.09    5.45
   2   3  -4  150.81    5.24
   2   3  -4  149.52    5.24
  -1  -3   3   64.90    2.31
  -1  -3   3   63.98    2.41
   1   3  -3   63.77    2.31
   1   3  -3   64.10    2.31
   0   3  -2  176.52    6.68
   0   3  -2  213.58    6.69
   1  -3   1   12.69    0.61
   1  -3   1   10.64    0.66
  -1   3  -1   13.12    0.61
   2  -3   0   33.44    1.37
  -2   3   0   33.19    1.35
   3  -3  -1   17.55    0.99
  -3   3   1   18.80    0.96
   4  -3  -2    3.04    0.58
  -4   3   2    4.01    0.50
   5  -3  -3   15.46    1.00
  -5   3   3   14.35    0.88
   6  -3  -4   14.76    1.08
  -6   3   4   13.73    0.93
   7  -3  -5   -0.32    0.66
  -7   3   5    0.39    0.50
   8  -3  -6    4.24    0.94
  -8   3   6    4.69    0.68
   9  -3  -7    2.55    0.96
  -9   3   7    2.80    0.91
  -9   3   7    1.18    0.58
  10  -3  -8    1.14    0.89
 -10   3   8    2.02    0.99
  11  -3  -9   -0.24    0.97
 -11   3   9   -0.66    0.95
  12  -3 -10   -1.38    1.06
 -12   3  10   -0.25    1.05
  13  -3 -11   -0.42    1.18
 -13   3  11    1.42    1.20
  14  -3 -12    0.47    1.29
 -14   3  12   -0.15    1.20
 -13  -2  14    0.39    1.32
  13   2 -14    0.43    1.19
 -12  -2  13    0.83    1.15
  12   2 -13    0.40    1.04
 -11  -2  12    1.66    1.15
  11   2 -12    1.72    1.07
 -10  -2  11    2.47    1.12
  10   2 -11    2.01    0.97
  -9  -2  10    2.44    1.05
   9   2 -10    4.23    0.96
  -8  -2   9    4.13    1.05
   8   2  -9    1.53    0.85
  -7  -2   8    0.13    0.81
  -7  -2   8    0.33    0.40
   7   2  -8    0.14    0.73
  -6  -2   7    7.40    0.63
  -6  -2   7    8.26    0.98
   6   2  -7    7.63    0.82
  -5  -2   6    5.81    0.54
  -5  -2   6    7.17    0.81
   5   2  -6    6.91    0.61
   5   2  -6    5.86    0.68
  -4  -2   5  114.85    4.37
  -4  -2   5  114.32    4.05
   4   2  -5  114.77    4.11
   4   2  -5  115.87    4.09
  -3  -2   4   18.84    1.09
  -3  -2   4   13.98    0.77
   3   2  -4   17.85    0.84
   3   2  -4   16.83    0.90
  -2  -2   3  265.78    9.43
   2   2  -3  270.82    9.10
   2   2  -3  263.73    9.10
  -1  -2   2  110.96    3.75
  -1  -2   2  107.53    3.75
   0  -2   1   -0.57    0.11
   0  -2   1   -0.49    0.10
   0  -2   1   -0.58    0.09
   0   2  -1   -0.43    0.10
   0   2  -1   -0.62    0.09
   0   2  -1   -0.61    0.11
   1  -2   0    0.24    0.15
   1  -2   0   -0.08    0.13
  -1   2   0    0.20    0.15
  -1   2   0   -0.16    0.11
   2  -2  -1  589.07   19.96
   2  -2  -1  588.13   19.97
  -2   2   1  589.82   19.96
   3  -2  -2    5.58    0.51
   3  -2  -2    4.72    0.56
  -3   2   2    5.32    0.50
   4  -2  -3    2.82    0.54
  -4   2   3    2.72    0.46
   5  -2  -4   68.70    2.65
  -5   2   4   67.02    2.56
   6  -2  -5    9.47    0.88
  -6   2   5    9.15    0.73
   7  -2  -6    0.60    0.73
  -7   2   6    0.39    0.48
   8  -2  -7    3.53    0.90
  -8   2   7    2.69    0.91
  -8   2   7    3.21    0.62
   9  -2  -8    1.76    0.89
  -9   2   8    2.98    0.99
  -9   2   8    1.66    0.58
  10  -2  -9    1.94    0.98
 -10   2   9   -0.18    0.91
  11  -2 -10    1.20    1.00
 -11   2  10   -0.39    1.03
  12  -2 -11    0.18    1.10
 -12   2  11   -0.08    1.09
  13  -2 -12   -0.47    1.19
 -13   2  12   -0.14    1.14
 -13  -1  13    0.22    1.29
  13   1 -13    3.24    1.24
 -12  -1  12    1.25    1.09
  12   1 -12    1.56    1.08
 -11  -1  11    0.57    1.07
  11   1 -11    1.73    1.02
 -10  -1  10    0.87    1.01
  10   1 -10    0.44    0.92
  -9  -1   9   -0.51    0.92
   9   1  -9    1.86    0.90
  -8  -1   8    0.60    0.27
  -8  -1   8    1.49    0.94
   8   1  -8    2.78    0.81
  -7  -1   7    8.02    0.68
  -7  -1   7    8.13    1.04
   7   1  -7    9.38    0.94
  -6  -1   6   21.71    1.04
  -6  -1   6   21.96    1.51
   6   1  -6   20.41    1.20
  -5  -1   5   53.04    1.98
  -5  -1   5   50.57    1.98
  -5  -1   5   52.77    2.28
   5   1  -5   52.66    2.09
   5   1  -5   52.10    2.03
  -4  -1   4   45.97    1.99
  -4  -1   4   49.82    2.01
  -4  -1   4   60.07    2.31
   4   1  -4   60.13    2.10
   4   1  -4   60.74    2.07
  -3  -1   3   12.40    0.89
   3   1  -3   12.33    0.65
   3   1  -3   11.98    0.72
  -2  -1   2   81.56    2.70
  -2  -1   2   80.34    2.51
   2   1  -2   66.93    2.52
   2   1  -2   61.91    2.52
  -1  -1   1   -0.15    0.11
   1   1  -1   -0.27    0.05
   1   1  -1   -0.20    0.06
   0  -1   0    0.01    0.04
   0  -1   0   -0.03    0.04
   0   1   0    0.00    0.01
   0   1   0    0.04    0.02
   1  -1  -1   -1.45    0.10
   1  -1  -1   -1.51    0.11
  -1   1   1   -1.44    0.10
  -1   1   1   -1.61    0.10
   2  -1  -2  240.85    8.13
   2  -1  -2  232.61    8.12
  -2   1   2  238.39    8.11
   3  -1  -3   47.37    1.81
   3  -1  -3   45.69    1.84
  -3   1   3   47.86    1.80
   4  -1  -4    7.31    0.69
  -4   1   4    7.57    0.62
   5  -1  -5    4.09    0.65
  -5   1   5    4.13    0.53
   6  -1  -6    6.12    0.79
  -6   1   6    5.77    0.62
   7  -1  -7    7.15    0.90
  -7   1   7    5.77    0.69
   8  -1  -8    2.63    0.93
  -8   1   8    4.24    0.64
  -8   1   8    3.43    0.98
   9  -1  -9    1.33    0.96
  -9   1   9    2.11    0.91
  10  -1 -10    0.39    0.91
 -10   1  10   -0.41    0.95
  11  -1 -11   -0.42    0.98
 -11   1  11   -1.03    1.00
  12  -1 -12   -0.36    1.05
 -12   1  12   -0.48    1.08
  13  -1 -13    0.27    1.16
 -13   1  13    2.39    1.29
 -13   0  12   -1.38    1.17
  13   0 -12   -1.26    1.08
 -12   0  11    3.67    1.16
  12   0 -11    3.55    1.16
 -11   0  10   -0.59    0.92
  11   0 -10    2.35    1.00
 -10   0   9   -0.17    0.93
  10   0  -9    1.05    0.90
  -9   0   8    7.48    1.19
   9   0  -8    6.79    1.03
  -8   0   7    0.45    0.87
  -8   0   7    0.72    0.42
  -8   0   7    0.27    0.38
   8   0  -7   -0.64    0.73
  -7   0   6    1.92    0.82
  -7   0   6    0.54    0.43
   7   0  -6    2.13    0.70
  -6   0   5    2.01    0.42
  -6   0   5    1.95    0.70
   6   0  -5    1.94    0.49
   6   0  -5    1.84    0.59
  -5   0   4   37.83    1.77
  -5   0   4   37.20    1.45
   5   0  -4   35.05    1.50
   5   0  -4   34.80    1.54
  -4   0   3   39.76    1.62
  -4   0   3   44.80    1.88
   4   0  -3   46.21    1.69
   4   0  -3   43.11    1.70
  -3   0   2  200.27    7.16
   3   0  -2  200.70    6.86
   3   0  -2  199.51    6.86
  -2   0   1   25.56    0.87
  -2   0   1   20.82    0.96
  -1   0   0    0.03    0.08
   1   0   0   -0.02    0.07
   0   0  -1    0.01    0.04
   0   0  -1   -0.02    0.02
   0   0  -1   -0.02    0.03
   0   0   1    0.02    0.01
   0   0   1   -0.06    0.04
   0   0   1    0.01    0.02
   1   0  -2    0.13    0.13
   1   0  -2    0.02    0.12
  -1   0   2    0.10    0.12
  -1   0   2    0.12    0.14
   2   0  -3  628.76   20.99
   2   0  -3  624.19   20.98
  -2   0   3  604.79   20.97
   3   0  -4  104.39    3.68
   3   0  -4  101.39    3.69
  -3   0   4  102.58    3.66
   4   0  -5   50.43    2.03
  -4   0   5   50.41    1.96
   5   0  -6   16.18    1.04
  -5   0   6   15.48    0.90
   6   0  -7   13.69    1.11
  -6   0   7   15.95    0.96
   7   0  -8   19.24    1.33
  -7   0   8   17.07    1.13
  -7   0   8   18.23    1.57
   8   0  -9   -0.78    0.87
  -8   0   9    0.03    0.90
  -8   0   9   -0.28    0.52
  -8   0   9    1.43    0.59
   9   0 -10    2.49    0.96
  -9   0  10    4.36    1.05
  10   0 -11   -0.08    0.92
 -10   0  11   -1.30    0.95
  11   0 -12    0.29    0.99
 -11   0  12    2.12    1.05
  12   0 -13    2.35    1.21
 -12   0  13   -1.25    1.06
  13   0 -14    1.95    1.30
 -13   0  14   -2.04    1.13
 -14   1  12    0.48    1.27
  14  -1 -12   -1.16    1.18
 -13   1  11   -0.27    1.12
  13  -1 -11   -0.14    1.09
 -12   1  10    0.13    0.97
  12  -1 -10    0.23    1.03
 -11   1   9    0.14    0.90
  11  -1  -9    0.94    0.94
 -10   1   8    1.83    0.91
  10  -1  -8    3.05    0.94
  -9   1   7    2.55    1.01
   9  -1  -7    6.34    0.99
  -8   1   6    0.66    0.87
  -8   1   6    0.42    0.47
   8  -1  -6    1.97    0.78
  -7   1   5    2.50    0.79
  -7   1   5    2.29    0.47
   7  -1  -5    1.39    0.66
  -6   1   4   28.10    1.61
  -6   1   4   29.24    1.25
   6  -1  -4   28.27    1.40
  -5   1   3   17.12    0.85
  -5   1   3   17.98    1.17
   5  -1  -3   18.72    0.99
   5  -1  -3   19.00    0.97
  -4   1   2    2.63    0.37
  -4   1   2    1.77    0.51
   4  -1  -2    1.98    0.39
   4  -1  -2    1.71    0.45
  -3   1   1    5.84    0.44
  -3   1   1    5.17    0.51
   3  -1  -1    5.14    0.46
   3  -1  -1    4.86    0.43
  -2   1   0  365.71   12.74
  -2   1   0  374.11   12.38
  -2   1   0  355.96   12.43
  -1   1  -1   -1.29    0.10
  -1   1  -1   -1.47    0.10
  -1   1  -1   -1.43    0.07
   1  -1   1   -1.40    0.06
   1  -1   1   -1.32    0.09
   1  -1   1   -1.37    0.09
   0   1  -2   -0.45    0.11
   0   1  -2   -0.57    0.11
   0   1  -2   -0.57    0.11
   0  -1   2   -0.48    0.14
   0  -1   2   -0.65    0.11
   0  -1   2   -0.52    0.10
   1   1  -3    0.39    0.28
   1   1  -3    0.41    0.23
  -1  -1   3    1.22    0.23
  -1  -1   3    0.78    0.23
  -1  -1   3    0.98    0.23
   2   1  -4  105.66    3.75
   2   1  -4  104.73    3.73
  -2  -1   4  106.15    3.73
   3   1  -5   14.33    0.92
  -3  -1   5   14.89    0.84
   4   1  -6    3.85    0.62
  -4  -1   6    5.53    0.55
   5   1  -7   -0.06    0.56
  -5  -1   7    0.44    0.44
  -5  -1   7   -0.01    0.43
  -5  -1   7   -0.06    0.62
   6   1  -8   11.96    1.06
  -6  -1   8   13.77    0.93
  -6  -1   8   12.59    0.92
  -6  -1   8   13.57    1.19
   7   1  -9    0.66    0.79
  -7  -1   9    1.78    0.82
  -7  -1   9    1.04    0.58
  -7  -1   9    1.75    0.58
   8   1 -10    5.52    1.03
  -8  -1  10    5.28    1.07
  -8  -1  10    7.71    0.82
   9   1 -11   -0.44    0.91
  -9  -1  11    0.21    0.97
  10   1 -12    2.77    1.10
 -10  -1  12    0.79    1.08
  11   1 -13    0.84    1.07
 -11  -1  13    0.08    1.05
  12   1 -14    1.88    1.20
 -12  -1  14   -0.28    1.04
  13   1 -15   -1.08    1.23
 -13  -1  15    0.66    1.33
 -14   2  11    1.19    1.25
  14  -2 -11   -0.80    1.17
 -13   2  10    0.28    1.15
  13  -2 -10   -0.43    1.08
 -12   2   9    1.47    1.11
  12  -2  -9    1.94    1.01
 -11   2   8   -0.32    0.95
  11  -2  -8   -0.24    0.90
 -10   2   7   -0.78    0.78
  10  -2  -7    0.79    0.87
  -9   2   6   11.81    1.34
   9  -2  -6   15.82    1.28
  -8   2   5    1.00    0.82
  -8   2   5    0.53    0.45
   8  -2  -5    1.31    0.75
  -7   2   4    0.92    0.73
  -7   2   4    1.05    0.43
   7  -2  -4    2.11    0.67
  -6   2   3    0.25    0.38
  -6   2   3   -0.76    0.53
   6  -2  -3    0.59    0.55
  -5   2   2    1.47    0.37
   5  -2  -2    1.07    0.43
   5  -2  -2    0.10    0.44
  -4   2   1    9.68    0.68
   4  -2  -1   10.40    0.76
   4  -2  -1    9.89    0.78
  -3   2   0    0.77    0.33
   3  -2   0    0.97    0.33
   3  -2   0    0.99    0.36
  -2   2  -1  716.25   24.95
   2  -2   1  739.52   24.89
   2  -2   1  750.89   24.97
  -1   2  -2    4.97    0.38
   0   2  -3    0.49    0.29
   0   2  -3    0.23    0.24
   0  -2   3    0.24    0.27
   0  -2   3    0.02    0.12
   0  -2   3    0.00    0.21
   0  -2   3    0.08    0.21
   1   2  -4   10.93    0.72
   1   2  -4   12.64    0.71
   1   2  -4   10.71    0.70
  -1  -2   4   11.15    0.69
  -1  -2   4   12.74    0.65
   2   2  -5   87.55    3.20
  -2  -2   5   87.99    3.17
  -2  -2   5   87.15    3.30
   3   2  -6    4.42    0.63
  -3  -2   6    3.43    0.61
  -3  -2   6    4.09    0.52
   4   2  -7   48.52    2.05
  -4  -2   7   50.63    2.21
  -4  -2   7   48.21    1.98
   5   2  -8    8.83    0.88
  -5  -2   8    7.73    0.71
  -5  -2   8    6.85    0.91
   6   2  -9    1.33    0.75
  -6  -2   9    0.27    0.78
  -6  -2   9    0.01    0.50
   7   2 -10   -1.18    0.85
  -7  -2  10    1.29    0.85
  -7  -2  10    0.99    0.61
   8   2 -11    2.57    1.01
  -8  -2  11    0.97    0.99
  -8  -2  11    1.45    0.60
   9   2 -12    0.34    0.93
  -9  -2  12    1.22    1.02
  10   2 -13   -0.93    0.92
 -10  -2  13    0.26    1.04
  11   2 -14    0.81    1.14
 -11  -2  14   -0.40    1.10
  12   2 -15   -0.76    1.19
 -12  -2  15   -0.45    1.21
 -14   3  10    1.65    1.24
  14  -3 -10    0.52    1.20
 -13   3   9    0.52    1.11
  13  -3  -9    0.96    1.10
 -12   3   8    2.14    1.07
  12  -3  -8    1.64    1.00
 -11   3   7    0.37    0.97
  11  -3  -7    1.91    0.98
 -10   3   6    1.17    0.85
  10  -3  -6    1.31    0.84
  -9   3   5    0.61    0.50
  -9   3   5   -0.47    0.85
   9  -3  -5    0.27    0.78
  -8   3   4    7.04    0.67
  -8   3   4    7.04    0.95
   8  -3  -4    6.86    0.89
  -7   3   3    0.21    0.63
  -7   3   3   -0.13    0.41
   7  -3  -3   -0.18    0.63
  -6   3   2    3.85    0.51
   6  -3  -2    3.00    0.63
  -5   3   1    1.08    0.39
   5  -3  -1    0.97    0.48
  -4   3   0   32.26    1.34
   4  -3   0   30.76    1.39
   4  -3   0   31.92    1.42
  -3   3  -1    6.48    0.53
   3  -3   1    6.42    0.56
   3  -3   1    7.50    0.61
  -2   3  -2   88.84    3.24
   2  -3   2   91.95    3.25
   2  -3   2   90.54    3.25
  -1   3  -3  848.69   29.04
   1  -3   3  867.19   29.05
   0   3  -4    3.70    0.49
   0  -3   4    3.17    0.33
   0  -3   4    2.99    0.44
   1   3  -5    2.35    0.44
   1   3  -5    2.83    0.54
  -1  -3   5    2.58    0.47
  -1  -3   5    2.38    0.46
  -1  -3   5    2.52    0.43
   2   3  -6    1.01    0.56
   2   3  -6    1.37    0.46
  -2  -3   6    1.28    0.45
  -2  -3   6    1.06    0.48
   3   3  -7    3.80    0.63
  -3  -3   7    3.39    0.51
  -3  -3   7    3.19    0.61
   4   3  -8   42.76    1.91
  -4  -3   8   42.93    1.80
  -4  -3   8   44.76    2.02
   5   3  -9    1.79    0.72
  -5  -3   9    1.84    0.54
  -5  -3   9    2.13    0.72
   6   3 -10   -0.58    0.77
  -6  -3  10    0.18    0.54
  -6  -3  10    0.80    0.85
   7   3 -11   -0.21    0.92
  -7  -3  11    0.10    0.91
  -7  -3  11    1.43    0.61
   8   3 -12    1.26    0.95
  -8  -3  12    1.39    1.01
   9   3 -13    0.76    0.96
  -9  -3  13    0.19    0.90
  10   3 -14    1.38    1.13
 -10  -3  14    1.05    1.12
  11   3 -15    1.54    1.19
 -11  -3  15    2.14    1.27
  12   3 -16    1.59    1.29
 -12  -3  16    0.24    1.23
 -14   4   9   -0.34    1.11
  14  -4  -9   -0.83    1.15
 -13   4   8    0.47    1.09
  13  -4  -8    2.07    1.10
 -12   4   7    1.81    1.04
  12  -4  -7    0.35    1.05
 -11   4   6    0.69    0.93
  11  -4  -6    1.55    0.97
 -10   4   5    0.02    0.84
  10  -4  -5    0.79    0.87
  -9   4   4    0.18    0.81
  -9   4   4   -0.10    0.50
   9  -4  -4    0.97    0.83
  -8   4   3    0.88    0.49
  -8   4   3   -0.18    0.72
   8  -4  -3    0.89    0.74
  -7   4   2    0.20    0.43
   7  -4  -2    0.12    0.63
  -6   4   1    3.92    0.54
   6  -4  -1    3.49    0.67
  -5   4   0    2.46    0.49
   5  -4   0    2.45    0.56
  -4   4  -1    6.97    0.59
   4  -4   1    6.53    0.66
  -3   4  -2    0.44    0.42
   3  -4   2   -0.20    0.46
  -2   4  -3    2.27    0.50
   2  -4   3    2.78    0.53
  -1   4  -4   68.43    2.42
  -1   4  -4   66.35    2.56
   1  -4   4   68.55    2.53
   1  -4   4   66.99    2.43
   0   4  -5   94.33    3.42
   0  -4   5   92.23    3.36
   0  -4   5   91.25    3.39
   1   4  -6   -0.59    0.54
  -1  -4   6   -0.20    0.45
  -1  -4   6   -0.70    0.45
  -1  -4   6    0.30    0.40
   2   4  -7    9.50    0.80
   2   4  -7   10.24    0.84
  -2  -4   7    9.61    0.74
  -2  -4   7    9.82    0.85
   3   4  -8   26.16    1.28
   3   4  -8   24.58    1.36
  -3  -4   8   24.99    1.26
  -3  -4   8   28.23    1.39
   4   4  -9    7.73    0.87
  -4  -4   9    7.67    0.75
  -4  -4   9    8.79    0.93
   5   4 -10    3.19    0.81
  -5  -4  10    2.25    0.62
  -5  -4  10    1.95    0.83
   6   4 -11   -0.22    0.85
  -6  -4  11    1.36    0.90
  -6  -4  11    0.74    0.60
   7   4 -12   -0.79    0.93
  -7  -4  12    0.64    0.59
  -7  -4  12   -0.47    0.89
   8   4 -13    1.02    1.01
  -8  -4  13    1.76    1.03
   9   4 -14    2.86    1.15
  -9  -4  14    4.49    1.23
  10   4 -15   -0.42    1.03
 -10  -4  15    0.68    1.12
  11   4 -16    0.54    1.20
 -11  -4  16    0.14    1.18
  12   4 -17    0.53    1.31
 -12  -4  17   -1.02    1.23
 -14   5   8   -0.66    1.09
  14  -5  -8    0.32    1.13
 -13   5   7   -0.56    0.99
  13  -5  -7   -0.68    1.01
 -12   5   6   -0.04    0.95
  12  -5  -6   -0.04    0.98
 -11   5   5    1.25    0.91
  11  -5  -5   -0.44    0.86
 -10   5   4    0.42    0.80
  10  -5  -4   -0.98    0.83
  -9   5   3    1.11    0.55
  -9   5   3    0.65    0.78
   9  -5  -3    0.63    0.86
  -8   5   2    2.15    0.57
  -8   5   2    2.60    0.75
   8  -5  -2    0.69    0.79
  -7   5   1    0.34    0.49
   7  -5  -1    0.42    0.64
  -6   5   0    0.29    0.47
   6  -5   0   -0.36    0.57
  -5   5  -1    8.74    0.72
   5  -5   1    8.82    0.81
  -4   5  -2    5.47    0.59
   4  -5   2    5.31    0.66
  -3   5  -3    6.01    0.64
   3  -5   3    4.58    0.65
  -2   5  -4   12.03    0.96
  -2   5  -4   10.83    0.59
   2  -5   4   10.51    0.82
  -1   5  -5   29.97    1.42
   1  -5   5   24.65    1.28
   1  -5   5   28.59    1.15
   0   5  -6   82.42    3.13
   0  -5   6   82.05    3.04
   0  -5   6   80.85    3.08
   1   5  -7    1.33    0.61
  -1  -5   7    0.76    0.42
  -1  -5   7    1.53    0.49
  -1  -5   7    0.20    0.48
   2   5  -8    3.04    0.68
   2   5  -8    3.01    0.52
  -2  -5   8    3.50    0.60
  -2  -5   8    2.75    0.56
   3   5  -9    1.05    0.66
   3   5  -9   -0.01    0.50
  -3  -5   9   -0.46    0.46
  -3  -5   9   -0.15    0.57
   4   5 -10    5.30    0.85
   4   5 -10    6.66    0.70
  -4  -5  10    6.67    0.75
  -4  -5  10    6.99    0.89
   5   5 -11    0.35    0.87
  -5  -5  11   -0.07    0.70
  -5  -5  11    1.37    0.63
   6   5 -12    2.91    1.02
  -6  -5  12    4.12    1.01
  -6  -5  12    3.41    0.72
   7   5 -13    0.50    0.99
  -7  -5  13    0.19    0.87
  -7  -5  13   -0.17    0.57
   8   5 -14    0.08    0.94
  -8  -5  14   -0.81    0.94
   9   5 -15   -0.36    1.07
  -9  -5  15   -0.48    0.94
  10   5 -16    0.92    1.17
 -10  -5  16    0.05    1.06
  11   5 -17    0.52    1.24
 -11  -5  17    1.61    1.31
 -14   6   7    1.16    1.15
  14  -6  -7    3.18    1.32
 -13   6   6   -0.63    0.94
  13  -6  -6    2.63    1.13
 -12   6   5    0.14    0.94
  12  -6  -5   -0.10    1.04
 -11   6   4    1.13    0.88
  11  -6  -4    0.88    0.96
 -10   6   3    0.71    0.80
  10  -6  -3    0.33    0.84
  -9   6   2    0.09    0.76
  -9   6   2    0.02    0.57
   9  -6  -2   -0.30    0.86
  -8   6   1   -0.14    0.54
   8  -6  -1    0.11    0.83
  -7   6   0    1.23    0.55
   7  -6   0   -0.25    0.72
  -6   6  -1   11.02    0.87
   6  -6   1   12.01    1.00
  -5   6  -2    1.02    0.49
   5  -6   2    0.43    0.58
  -4   6  -3   26.48    1.34
   4  -6   3   26.66    1.33
  -3   6  -4   12.03    1.01
   3  -6   4   14.30    1.00
  -2   6  -5   45.36    1.97
  -2   6  -5   43.67    1.70
   2  -6   5   49.02    1.98
  -1   6  -6   17.02    1.16
   1  -6   6   18.66    1.07
   1  -6   6   19.50    0.90
   0   6  -7    6.43    0.75
   0  -6   7    6.09    0.71
   0  -6   7    8.20    0.69
   1   6  -8   22.65    1.32
  -1  -6   8   22.52    1.23
  -1  -6   8   22.19    1.19
  -1  -6   8   22.47    1.18
   2   6  -9   -0.62    0.63
  -2  -6   9    0.31    0.52
  -2  -6   9    0.53    0.55
   3   6 -10   15.58    1.28
   3   6 -10   18.30    1.10
  -3  -6  10   17.41    1.24
  -3  -6  10   18.71    1.13
   4   6 -11    0.60    0.80
   4   6 -11   -0.19    0.56
  -4  -6  11   -0.21    0.70
  -4  -6  11    0.52    0.63
   5   6 -12    3.59    0.72
   5   6 -12    3.47    1.01
  -5  -6  12    4.87    0.82
  -5  -6  12    5.39    1.02
   6   6 -13   -0.02    0.90
   6   6 -13   -0.79    0.65
  -6  -6  13   -1.10    0.77
  -6  -6  13   -0.01    0.66
   7   6 -14    0.27    0.70
   7   6 -14    0.26    0.93
  -7  -6  14    1.88    0.99
   8   6 -15    1.71    1.12
  -8  -6  15    0.03    1.03
   9   6 -16   -0.30    1.13
  -9  -6  16    2.65    1.21
  10   6 -17    0.45    1.17
 -10  -6  17   -1.25    1.16
  11   6 -18    0.22    1.19
 -11  -6  18   -2.40    1.21
 -14   7   6    0.36    1.07
  14  -7  -6    0.70    1.16
 -13   7   5   -0.39    0.95
  13  -7  -5    0.51    1.13
 -12   7   4   -0.53    0.88
  12  -7  -4   -1.02    0.96
 -11   7   3   -0.12    0.88
  11  -7  -3   -0.90    0.92
 -10   7   2    0.13    0.73
  10  -7  -2    1.40    0.91
  -9   7   1    3.32    0.69
  -9   7   1    3.51    0.82
   9  -7  -1    0.54    0.90
  -8   7   0    1.49    0.62
   8  -7   0    1.70    0.84
  -7   7  -1   -0.08    0.58
   7  -7   1    1.07    0.75
  -6   7  -2    1.06    0.59
   6  -7   2    0.52    0.68
  -5   7  -3    1.23    0.57
   5  -7   3   -0.73    0.60
  -4   7  -4   12.55    1.03
   4  -7   4   12.87    1.06
  -3   7  -5   92.75    3.51
   3  -7   5   89.24    3.47
  -2   7  -6    5.25    0.71
   2  -7   6    5.46    0.75
  -1   7  -7   -0.08    0.56
   1  -7   7    0.67    0.53
   1  -7   7    0.06    0.37
   0   7  -8   25.08    1.37
   0  -7   8   23.77    1.19
   0  -7   8   22.08    1.30
   1   7  -9   10.10    1.02
  -1  -7   9   12.56    0.94
  -1  -7   9   12.71    0.99
  -1  -7   9   12.59    0.94
   2   7 -10    2.16    0.78
  -2  -7  10    3.13    0.66
  -2  -7  10    0.52    0.57
   3   7 -11    0.51    0.80
  -3  -7  11    0.39    0.65
  -3  -7  11    0.29    0.61
   4   7 -12   11.50    1.21
   4   7 -12   11.17    0.85
  -4  -7  12   12.83    1.07
  -4  -7  12    9.69    1.12
   5   7 -13    1.38    1.05
   5   7 -13    2.95    0.68
  -5  -7  13    4.00    0.99
  -5  -7  13    4.53    0.81
   6   7 -14    1.18    0.97
   6   7 -14    1.84    0.68
  -6  -7  14    0.51    0.66
  -6  -7  14    0.48    0.92
   7   7 -15   -0.33    1.01
  -7  -7  15    0.91    0.99
   8   7 -16   -0.29    1.02
  -8  -7  16    1.47    1.11
   9   7 -17    0.70    1.16
  -9  -7  17   -0.57    1.08
  10   7 -18   -0.08    1.14
 -10  -7  18    0.21    1.23
  11   7 -19    1.23    1.34
 -11  -7  19    0.47    1.33
 -14   8   5   -0.08    1.00
  14  -8  -5    1.15    1.26
 -13   8   4    0.29    1.00
  13  -8  -4    0.67    1.11
 -12   8   3    1.74    1.01
  12  -8  -3    0.84    1.02
 -11   8   2    2.31    0.88
  11  -8  -2    3.34    1.06
 -10   8   1   -0.30    0.71
  10  -8  -1    0.74    0.91
  -9   8   0    0.98    0.64
   9  -8   0    1.40    0.93
  -8   8  -1   -0.70    0.58
   8  -8   1   -0.55    0.82
  -7   8  -2    1.06    0.62
   7  -8   2    1.28    0.81
  -6   8  -3    5.75    0.77
   6  -8   3    4.06    0.78
  -5   8  -4   13.52    1.09
   5  -8   4   10.42    1.05
  -4   8  -5    0.28    0.61
   4  -8   5    0.18    0.64
  -3   8  -6    1.72    0.67
   3  -8   6    1.62    0.68
  -2   8  -7   45.36    2.09
   2  -8   7   43.56    2.04
  -1   8  -8   67.30    2.77
   1  -8   8   68.37    2.60
   1  -8   8   67.81    2.75
   0   8  -9    1.62    0.75
   0  -8   9    1.38    0.65
   0  -8   9    0.64    0.60
   0  -8   9    1.99    0.52
   1   8 -10   14.26    1.23
  -1  -8  10   15.36    1.12
  -1  -8  10   13.19    1.03
  -1  -8  10   15.77    1.06
   2   8 -11    0.64    0.74
  -2  -8  11    0.25    0.65
  -2  -8  11    0.14    0.62
   3   8 -12    1.38    0.90
  -3  -8  12    0.76    0.67
  -3  -8  12    1.43    0.73
   4   8 -13   -0.20    0.90
  -4  -8  13   -0.19    0.80
  -4  -8  13   -0.30    0.63
   5   8 -14    0.88    0.99
  -5  -8  14    1.82    0.89
  -5  -8  14    0.56    0.70
   6   8 -15    1.74    1.07
  -6  -8  15    2.22    1.01
   7   8 -16    0.20    1.03
  -7  -8  16   -1.33    0.93
   8   8 -17    0.10    1.14
  -8  -8  17   -0.65    1.08
   9   8 -18    1.92    1.18
  -9  -8  18   -1.17    1.15
  10   8 -19   -0.71    1.25
 -10  -8  19   -1.07    1.26
 -14   9   4    0.51    1.00
  14  -9  -4    0.57    1.22
 -13   9   3   -1.18    0.85
  13  -9  -3    0.68    1.19
 -12   9   2   -1.52    0.85
  12  -9  -2   -0.41    1.01
 -11   9   1    0.05    0.75
  11  -9  -1   -0.17    1.00
 -10   9   0    1.28    0.74
  10  -9   0    2.03    1.02
  -9   9  -1    0.76    0.69
   9  -9   1    0.41    0.91
  -8   9  -2    1.43    0.68
   8  -9   2    0.77    0.91
  -7   9  -3    0.13    0.68
   7  -9   3    1.52    0.86
  -6   9  -4    7.86    0.89
   6  -9   4    7.34    1.02
  -5   9  -5   -0.09    0.64
   5  -9   5    0.10    0.73
  -4   9  -6    2.84    0.76
   4  -9   6    0.96    0.73
  -3   9  -7    0.67    0.72
   3  -9   7    0.77    0.65
  -2   9  -8    0.77    0.76
   2  -9   8    0.51    0.69
  -1   9  -9    1.37    0.78
   1  -9   9    0.15    0.61
   1  -9   9    0.22    0.48
   0   9 -10    1.09    0.83
   0  -9  10    0.98    0.68
   0  -9  10    1.04    0.56
   0  -9  10    1.04    0.64
   1   9 -11    0.42    0.87
  -1  -9  11   -0.09    0.62
  -1  -9  11    0.08    0.66
  -1  -9  11    0.59    0.62
   2   9 -12   -0.05    0.92
  -2  -9  12   -0.94    0.65
  -2  -9  12    0.47    0.71
   3   9 -13    0.37    0.93
  -3  -9  13    0.11    0.74
  -3  -9  13    0.27    0.68
   4   9 -14    0.30    1.01
  -4  -9  14    1.49    0.92
  -4  -9  14    1.62    0.78
   5   9 -15   -0.61    1.05
  -5  -9  15    0.59    0.86
  -5  -9  15    0.56    0.69
   6   9 -16    1.73    1.03
  -6  -9  16   -0.14    0.95
   7   9 -17    1.90    1.18
  -7  -9  17    1.31    1.11
   8   9 -18    1.75    1.16
  -8  -9  18    0.13    1.15
   9   9 -19    1.79    1.23
  -9  -9  19    1.81    1.29
  10   9 -20    0.27    1.31
 -10  -9  20    0.49    1.31
 -14  10   3    0.00    1.00
  14 -10  -3    0.40    1.29
 -13  10   2    1.75    0.98
  13 -10  -2    0.26    1.10
 -12  10   1    1.37    0.90
  12 -10  -1    2.09    1.21
 -11  10   0    0.98    0.81
  11 -10   0   -0.31    1.08
 -10  10  -1   -0.03    0.66
  10 -10   1   -1.29    0.90
  -9  10  -2    1.70    0.75
   9 -10   2    1.90    0.99
  -8  10  -3    0.72    0.69
   8 -10   3   -0.86    0.86
  -7  10  -4    0.77    0.70
   7 -10   4    1.72    0.94
  -6  10  -5    2.40    0.78
   6 -10   5    2.24    0.83
  -5  10  -6    3.62    0.82
   5 -10   6    3.25    0.91
  -4  10  -7   20.60    1.54
   4 -10   7   20.49    1.40
  -3  10  -8   26.28    1.67
   3 -10   8   20.91    1.52
  -2  10  -9    4.57    0.98
   2 -10   9    5.92    0.95
  -1  10 -10    0.03    0.85
   1 -10  10    0.75    0.56
   1 -10  10   -0.23    0.65
   0  10 -11   -0.52    0.87
   0 -10  11    0.27    0.60
   0 -10  11    0.32    0.73
   0 -10  11   -0.39    0.67
   1  10 -12    6.41    1.14
  -1 -10  12    9.59    0.88
  -1 -10  12    8.46    0.90
  -1 -10  12    8.83    1.03
   2  10 -13    6.91    1.22
  -2 -10  13    5.23    0.88
  -2 -10  13    4.28    0.88
   3  10 -14    2.02    1.07
  -3 -10  14    6.72    0.95
  -3 -10  14    3.79    0.91
   4  10 -15    1.41    1.12
  -4 -10  15    3.30    0.82
  -4 -10  15    3.56    0.94
   5  10 -16   -1.13    0.98
  -5 -10  16    0.38    0.93
   6  10 -17   -0.56    1.07
  -6 -10  17    0.10    1.02
   7  10 -18   -1.52    1.08
  -7 -10  18    1.87    1.09
   8  10 -19   -0.53    1.23
  -8 -10  19    0.51    1.16
   9  10 -20    0.05    1.32
  -9 -10  20   -1.15    1.17
 -14  11   2   -1.07    0.91
  14 -11  -2   -0.37    1.27
 -13  11   1    0.21    0.89
  13 -11  -1   -0.13    1.18
 -12  11   0    4.16    1.03
  12 -11   0    3.82    1.31
 -11  11  -1    1.21    0.74
  11 -11   1    0.14    1.09
 -10  11  -2    1.47    0.66
  10 -11   2    0.89    1.03
  -9  11  -3   -0.06    0.71
   9 -11   3    2.31    1.02
  -8  11  -4    0.59    0.73
   8 -11   4   -0.33    0.89
  -7  11  -5    7.16    0.97
   7 -11   5    6.35    1.13
  -6  11  -6    0.08    0.77
   6 -11   6    0.79    0.92
  -5  11  -7    3.46    0.92
   5 -11   7    5.42    0.98
  -4  11  -8    1.83    0.84
   4 -11   8    2.05    0.90
  -3  11  -9    1.79    0.94
   3 -11   9    1.35    0.79
  -2  11 -10    0.69    0.84
   2 -11  10   -0.57    0.79
  -1  11 -11    0.43    0.95
   1 -11  11    0.87    0.63
   1 -11  11   -1.87    0.74
   0  11 -12    0.77    0.99
   0 -11  12    0.97    0.78
   0 -11  12   -0.19    0.67
   0 -11  12    2.07    0.84
   1  11 -13   -0.88    0.99
  -1 -11  13    0.95    0.71
  -1 -11  13   -0.55    0.77
  -1 -11  13   -0.26    0.69
   2  11 -14    4.83    1.12
  -2 -11  14    5.40    0.96
  -2 -11  14    4.61    0.92
   3  11 -15   -0.40    0.99
  -3 -11  15    2.27    0.84
  -3 -11  15    0.28    0.80
   4  11 -16   -0.32    1.02
  -4 -11  16    0.78    0.77
  -4 -11  16   -0.39    0.79
   5  11 -17    0.68    1.10
  -5 -11  17    0.15    0.96
   6  11 -18    1.51    1.15
  -6 -11  18   -0.27    1.00
   7  11 -19   -0.65    1.22
  -7 -11  19    1.40    1.15
   8  11 -20   -0.61    1.28
  -8 -11  20   -1.23    1.11
  14 -12  -1   -1.04    1.21
  13 -12   0   -1.10    1.18
 -12  12  -1    1.89    0.82
  12 -12   1    1.22    1.26
 -11  12  -2    5.55    0.90
  11 -12   2    2.44    1.20
 -10  12  -3   -0.04    0.62
  10 -12   3    1.09    1.06
  -9  12  -4    0.97    0.80
   9 -12   4    2.24    1.06
  -8  12  -5    0.95    0.78
   8 -12   5    1.55    1.01
  -7  12  -6   -0.61    0.78
   7 -12   6   -0.09    0.96
  -6  12  -7    0.08    0.81
   6 -12   7   -0.01    0.95
  -5  12  -8    2.72    0.96
   5 -12   8    3.24    0.94
  -4  12  -9   23.84    1.80
   4 -12   9   22.87    1.61
  -3  12 -10    6.84    1.16
   3 -12  10    6.90    1.11
  -2  12 -11    0.98    0.91
   2 -12  11   -0.32    0.77
  -1  12 -12   -0.07    1.02
   1 -12  12   -0.70    0.83
   0  12 -13   -0.95    0.97
   0 -12  13   -1.38    0.66
   0 -12  13   -0.01    0.75
   0 -12  13   -0.31    0.83
   1  12 -14    0.39    1.07
  -1 -12  14    0.76    0.73
  -1 -12  14    0.71    0.77
  -1 -12  14   -0.68    0.78
   2  12 -15    0.93    1.06
  -2 -12  15   -0.30    0.72
  -2 -12  15   -0.35    0.78
   3  12 -16   -1.01    1.03
  -3 -12  16   -0.06    0.81
  -3 -12  16   -0.29    0.74
   4  12 -17   -1.09    1.05
  -4 -12  17    1.03    0.92
   5  12 -18   -0.08    1.12
  -5 -12  18    1.50    1.01
   6  12 -19    1.57    1.20
  -6 -12  19   -0.13    1.00
   7  12 -20    0.98    1.24
  -7 -12  20    1.80    1.22
   8  12 -21   -0.88    1.35
  -8 -12  21    0.71    1.22
  13 -13   1   -0.79    1.24
  12 -13   2   -0.43    1.19
  11 -13   3    3.81    1.32
  10 -13   4   -0.28    1.06
  -9  13  -5    1.74    0.85
   9 -13   5    1.04    1.08
  -8  13  -6   -0.02    0.77
   8 -13   6   -0.66    0.97
  -7  13  -7    1.06    0.83
   7 -13   7    0.09    0.95
  -6  13  -8    0.66    0.87
   6 -13   8    0.96    0.92
  -5  13  -9    1.39    0.96
   5 -13   9    2.07    0.99
  -4  13 -10    1.00    0.94
   4 -13  10   -0.54    0.82
  -3  13 -11    6.48    1.21
   3 -13  11    5.65    1.13
  -2  13 -12   -0.57    0.92
   2 -13  12   -0.47    0.86
  -1  13 -13    1.27    1.01
   1 -13  13    0.27    0.89
   0  13 -14    3.95    1.16
   0 -13  14    4.33    0.81
   0 -13  14    5.05    0.87
   0 -13  14    6.03    1.05
   1  13 -15    1.86    1.11
  -1 -13  15    1.24    0.73
  -1 -13  15    0.64    0.73
  -1 -13  15    0.30    0.89
   2  13 -16   -0.61    1.05
  -2 -13  16    0.85    0.80
  -2 -13  16    0.49    0.78
   3  13 -17    0.41    1.16
  -3 -13  17    1.38    0.86
  -3 -13  17    1.93    0.84
   4  13 -18    1.40    1.22
  -4 -13  18    0.66    0.94
   5  13 -19   -0.27    1.18
  -5 -13  19   -0.62    1.00
   6  13 -20    1.28    1.27
  -6 -13  20   -0.19    1.05
   7  13 -21   -1.33    1.23
  -7 -13  21   -0.07    1.12
  13 -14   2    1.28    1.36
  12 -14   3    0.41    1.26
  11 -14   4    1.07    1.18
  10 -14   5   -0.81    1.12
  -9  14  -6   -0.06    0.80
   9 -14   6   -1.95    1.01
  -8  14  -7   -0.44    0.77
   8 -14   7    0.95    1.07
  -7  14  -8   -0.47    0.85
   7 -14   8    2.31    1.08
  -6  14  -9    2.56    0.96
   6 -14   9    0.21    0.91
  -5  14 -10    0.67    0.96
   5 -14  10    0.78    0.95
  -4  14 -11    0.95    1.06
   4 -14  11    0.72    0.96
  -3  14 -12    1.12    1.06
   3 -14  12   -0.43    0.90
  -2  14 -13    1.72    1.12
   2 -14  13    2.22    0.91
  -1  14 -14    0.89    1.13
   1 -14  14    0.35    0.87
   1 -14  14    0.88    0.84
   0  14 -15    2.24    1.03
   0 -14  15   -0.10    0.70
   0 -14  15   -0.12    0.74
   0 -14  15   -0.07    0.83
   1  14 -16    1.86    1.12
  -1 -14  16    0.57    0.80
  -1 -14  16    1.80    0.89
   2  14 -17    0.52    1.16
  -2 -14  17   -0.65    0.81
  -2 -14  17   -0.18    0.81
   3  14 -18    1.36    1.21
  -3 -14  18    1.62    0.93
   4  14 -19    2.02    1.27
  -4 -14  19    0.73    0.91
   5  14 -20    0.43    1.27
  -5 -14  20    0.69    1.05
   6  14 -21   -2.17    1.25
  -6 -14  21    0.22    1.14
  13 -15   3    1.74    1.37
  12 -15   4    1.17    1.32
  11 -15   5    2.92    1.29
  10 -15   6    2.13    1.28
  -9  15  -7    1.38    0.92
   9 -15   7    0.64    1.16
  -8  15  -8   -0.47    0.84
   8 -15   8   -2.28    0.88
  -7  15  -9    0.19    0.91
   7 -15   9    1.25    1.09
  -6  15 -10    1.99    0.97
   6 -15  10    1.94    1.09
  -5  15 -11    0.94    0.95
   5 -15  11    0.81    0.98
  -4  15 -12   -0.51    1.03
   4 -15  12   -0.78    0.90
  -3  15 -13    3.19    1.17
   3 -15  13    2.23    1.04
  -2  15 -14    3.58    1.21
   2 -15  14   -0.14    0.92
  -1  15 -15    0.46    1.15
   1 -15  15   -0.04    0.88
   1 -15  15    0.94    0.93
   0  15 -16   -0.14    1.13
   0 -15  16    0.02    0.74
   0 -15  16    2.07    0.98
   1  15 -17    3.06    1.26
  -1 -15  17    1.56    0.85
  -1 -15  17    0.50    0.90
   2  15 -18    0.42    1.21
  -2 -15  18    0.83    0.93
   3  15 -19    0.54    1.23
  -3 -15  19    0.87    0.95
   4  15 -20   -1.52    1.23
  -4 -15  20    0.98    1.02
   5  15 -21   -2.34    1.29
  -5 -15  21   -1.18    1.04
  12 -16   5    2.12    1.37
  11 -16   6    1.36    1.31
  10 -16   7    1.44    1.29
  -9  16  -8   -0.16    0.90
   9 -16   8    1.06    1.10
  -8  16  -9   -0.45    0.88
   8 -16   9    2.65    1.22
  -7  16 -10   -1.07    0.91
   7 -16  10   -0.18    1.03
  -6  16 -11   -0.10    0.99
   6 -16  11   -0.47    1.02
  -5  16 -12    1.27    1.11
   5 -16  12    1.69    1.09
  -4  16 -13    1.02    1.17
   4 -16  13    0.14    1.00
  -3  16 -14    1.52    1.18
   3 -16  14   -0.21    0.96
  -2  16 -15    1.31    1.22
   2 -16  15    2.29    1.07
  -1  16 -16    3.18    1.30
   1 -16  16    1.18    0.96
   0  16 -17   -1.25    1.18
   0 -16  17    0.57    0.94
   1  16 -18    2.90    1.34
  -1 -16  18    0.04    0.92
   2  16 -19   -2.49    1.14
   3  16 -20    0.46    1.28
  -3 -16  20   -0.73    0.99
   4  16 -21   -0.65    1.31
  -4 -16  21   -0.30    1.03
  11 -17   7    2.09    1.37
  10 -17   8    0.49    1.24
  -9  17  -9    0.62    0.95
   9 -17   9   -0.03    1.22
  -8  17 -10   -0.51    0.97
   8 -17  10   -0.18    1.11
  -7  17 -11   -0.46    1.00
   7 -17  11    0.97    1.12
  -6  17 -12   -0.27    1.01
   6 -17  12   -0.87    1.06
  -5  17 -13    1.02    1.14
   5 -17  13    0.92    1.11
  -4  17 -14    0.20    1.19
   4 -17  14    0.12    1.03
  -3  17 -15   -2.68    0.96
   3 -17  15    1.09    1.03
  -2  17 -16   -1.69    1.15
   2 -17  16   -0.73    0.96
  -1  17 -17   -1.50    1.17
   1 -17  17    0.45    0.97
   0  17 -18   -0.36    1.26
   0 -17  18   -0.73    0.96
   1  17 -19   -1.66    1.24
   2  17 -20   -0.85    1.26
   3  17 -21   -1.86    1.29
  11 -18   8   -1.22    1.34
  10 -18   9   -0.48    1.25
   9 -18  10    1.12    1.26
  -8  18 -11    0.05    1.02
   8 -18  11    0.84    1.23
  -7  18 -12   -0.56    1.05
   7 -18  12    0.79    1.13
  -6  18 -13   -1.32    1.05
   6 -18  13    0.64    1.15
  -5  18 -14    0.47    1.18
   5 -18  14   -0.81    1.07
  -4  18 -15   -0.86    1.21
   4 -18  15    1.69    1.13
  -3  18 -16   -0.01    1.19
   3 -18  16   -0.58    1.01
  -2  18 -17   -0.06    1.31
   2 -18  17   -0.12    1.04
  -1  18 -18   -0.96    1.22
   1 -18  18   -0.26    1.00
   0  18 -19    0.11    1.32
   1  18 -20   -0.74    1.31
   2  18 -21    0.71    1.45
  10 -19  10   -1.15    1.28
   9 -19  11    2.00    1.33
  -8  19 -12    0.06    1.16
   8 -19  12    1.93    1.28
  -7  19 -13    0.68    1.11
   7 -19  13    1.63    1.25
  -6  19 -14   -0.66    1.17
   6 -19  14    0.79    1.14
  -5  19 -15   -0.48    1.16
   5 -19  15   -0.62    1.10
  -4  19 -16    2.73    1.38
   4 -19  16    1.20    1.15
  -3  19 -17   -0.55    1.29
   3 -19  17    0.28    1.10
  -2  19 -18    1.00    1.36
   2 -19  18   -0.94    1.02
  -1  19 -19    1.16    1.40
   0  19 -20   -0.31    1.36
   1  19 -21    0.95    1.47
  -8  20 -13   -1.21    1.14
   8 -20  13   -1.66    1.18
  -7  20 -14   -0.97    1.11
   7 -20  14   -0.13    1.21
  -6  20 -15    0.82    1.26
   6 -20  15    2.87    1.31
  -5  20 -16   -0.19    1.26
   5 -20  16    1.47    1.23
  -4  20 -17    0.67    1.25
   4 -20  17   -1.12    1.09
  -3  20 -18   -0.71    1.32
   3 -20  18    0.12    1.16
  -2  20 -19    0.38    1.39
   2 -20  19   -2.63    0.99
  -1  20 -20    0.20    1.47
  -1  21 -18   -0.99    1.29
  -2  21 -17   -1.07    1.34
   3 -21  16    1.09    1.11
  -3  21 -16   -0.75    1.31
   4 -21  15    0.64    1.11
  -4  21 -15   -0.17    1.30
   5 -21  14    2.74    1.27
  -5  21 -14    0.49    1.24
   6 -21  13    3.51    1.31
  -6  21 -13    4.38    1.38
   7 -21  12   -0.14    1.19
  -7  21 -12   -1.38    1.15
   8 -21  11    2.34    1.35
  -8  21 -11    1.55    1.17
   1  20 -19   -1.33    1.37
   0  20 -18    2.03    1.44
  -1  20 -17    0.52    1.33
   2 -20  16   -0.28    1.00
  -2  20 -16    1.41    1.33
   3 -20  15    2.22    1.12
  -3  20 -15    0.18    1.29
   4 -20  14    0.16    1.02
  -4  20 -14    0.59    1.24
   5 -20  13    1.83    1.17
  -5  20 -13    1.23    1.21
   6 -20  12    0.52    1.13
  -6  20 -12   -1.93    1.07
   7 -20  11    2.98    1.30
  -7  20 -11    2.14    1.23
   8 -20  10    0.91    1.23
  -8  20 -10    0.71    1.10
   9 -20   9   -0.73    1.24
  -9  20  -9   -0.86    1.04
   3  19 -20   -0.03    1.47
   2  19 -19    0.61    1.47
   1  19 -18    1.68    1.41
   0  19 -17    1.09    1.30
  -1  19 -16    1.30    1.35
   2 -19  15    0.71    1.01
  -2  19 -15   -0.78    1.16
   3 -19  14    0.93    0.99
  -3  19 -14    0.66    1.24
   4 -19  13    1.94    1.11
  -4  19 -13    2.14    1.25
   5 -19  12   -1.14    0.93
  -5  19 -12   -0.71    1.11
   6 -19  11   -0.81    1.07
  -6  19 -11   -0.47    1.03
   7 -19  10    0.02    1.12
  -7  19 -10   -0.40    1.04
   8 -19   9   -1.64    1.12
  -8  19  -9    0.75    1.04
   9 -19   8   -2.09    1.17
  -9  19  -8    0.29    1.08
  10 -19   7    3.06    1.38
  -4 -18  20    0.34    1.15
   4  18 -20   -0.13    1.32
  -3 -18  19    0.20    1.08
   3  18 -19    0.93    1.29
  -2 -18  18   -1.07    0.96
   2  18 -18    1.77    1.32
   1  18 -17    0.43    1.27
   0  18 -16    0.50    1.23
   1 -18  15    0.80    1.01
  -1  18 -15    1.03    1.27
   2 -18  14    0.19    0.95
  -2  18 -14   -0.83    1.14
   3 -18  13   -0.07    0.93
  -3  18 -13    0.26    1.17
   4 -18  12   -0.47    0.98
  -4  18 -12   -1.87    0.94
   5 -18  11    0.45    1.04
  -5  18 -11   -0.21    1.04
   6 -18  10    1.87    1.15
  -6  18 -10    0.60    0.95
   7 -18   9    0.43    1.13
  -7  18  -9    0.71    1.06
   8 -18   8   -0.19    1.13
  -8  18  -8   -0.32    0.96
   9 -18   7   -0.53    1.19
  -9  18  -7    0.19    0.94
  10 -18   6    0.08    1.24
  11 -18   5    0.23    1.36
  -5 -17  20   -0.20    1.20
   5  17 -20   -1.15    1.31
  -4 -17  19    0.34    1.10
   4  17 -19   -2.56    1.15
  -3 -17  18   -1.00    0.99
   3  17 -18    0.03    1.22
  -2 -17  17   -0.22    0.95
   2  17 -17   -2.73    1.08
   1  17 -16   -1.34    1.17
   0 -17  15   -0.48    0.84
   0  17 -15    1.59    1.22
   1 -17  14    2.00    1.02
  -1  17 -14    1.92    1.22
   2 -17  13   -0.69    0.87
  -2  17 -13    0.02    1.11
   3 -17  12    1.51    0.99
  -3  17 -12    0.01    1.00
   4 -17  11   -0.69    0.92
  -4  17 -11   -2.12    0.87
   5 -17  10   -0.69    0.97
  -5  17 -10   -0.39    0.99
   6 -17   9    1.94    1.10
  -6  17  -9   -1.14    0.93
   7 -17   8   -1.03    1.07
  -7  17  -8    0.73    0.99
   8 -17   7    1.65    1.24
  -8  17  -7    0.28    0.98
   9 -17   6    0.91    1.20
  -9  17  -6    0.11    0.98
  10 -17   5   -0.31    1.22
 -10  17  -5   -0.53    0.90
  11 -17   4   -0.48    1.31
  12 -17   3    2.40    1.49
  -6 -16  20    1.48    1.19
   6  16 -20   -0.64    1.29
  -5 -16  19    0.68    1.10
   5  16 -19    2.96    1.35
  -4 -16  18   -0.38    1.04
   4  16 -18   -1.28    1.22
  -3 -16  17   -0.32    0.96
   3  16 -17   -0.35    1.12
  -2 -16  16    0.77    0.94
   2  16 -16   -0.39    1.09
  -1 -16  15    0.40    0.94
  -1 -16  15    0.33    0.83
   1  16 -15    0.56    1.13
   0 -16  14    3.66    0.97
   0  16 -14    1.05    1.16
   1 -16  13    2.27    0.98
  -1  16 -13    0.22    1.10
   2 -16  12   -0.61    0.85
  -2  16 -12    0.60    1.05
   3 -16  11    0.90    0.94
  -3  16 -11    0.65    1.08
   4 -16  10    0.19    0.92
  -4  16 -10   -0.03    1.02
   5 -16   9    0.53    0.99
  -5  16  -9   -1.21    0.89
   6 -16   8    3.81    1.19
  -6  16  -8    3.78    1.06
   7 -16   7    1.04    1.00
  -7  16  -7   -0.04    0.89
   8 -16   6    4.00    1.25
  -8  16  -6    2.54    1.04
   9 -16   5    1.95    1.18
  -9  16  -5   -1.09    0.87
  10 -16   4    1.30    1.23
 -10  16  -4    1.77    0.96
  11 -16   3    0.81    1.32
  12 -16   2    0.05    1.34
  -7 -15  20   -0.51    1.24
   7  15 -20    1.98    1.41
  -6 -15  19   -0.13    1.13
   6  15 -19    1.19    1.33
  -5 -15  18   -1.80    0.95
   5  15 -18    1.50    1.29
  -4 -15  17   -0.44    1.00
   4  15 -17    0.75    1.23
  -3 -15  16    0.00    0.94
   3  15 -16   -0.03    1.15
  -2 -15  15    0.23    0.90
   2  15 -15   -0.02    1.05
  -1 -15  14    1.19    0.82
  -1 -15  14    1.13    0.84
   1  15 -14    2.51    1.12
   0 -15  13    0.90    0.84
   0  15 -13    1.36    1.00
   1 -15  12    0.22    0.83
  -1  15 -12   -0.55    1.01
   2 -15  11    3.41    1.01
  -2  15 -11    2.47    1.13
   3 -15  10    1.88    0.96
  -3  15 -10    3.56    1.13
   4 -15   9   -1.83    0.83
  -4  15  -9    1.09    1.00
   5 -15   8    1.01    0.98
  -5  15  -8    0.22    0.92
   6 -15   7   -1.64    0.91
  -6  15  -7   -0.55    0.89
   7 -15   6    1.11    1.04
  -7  15  -6   -0.17    0.76
   8 -15   5   -0.65    1.06
  -8  15  -5    1.25    0.88
   9 -15   4   -0.58    1.06
  -9  15  -4   -1.06    0.83
  10 -15   3   -0.89    1.16
 -10  15  -3    0.10    0.86
  11 -15   2    0.63    1.22
  12 -15   1   -0.65    1.24
  13 -15   0    2.41    1.45
  -8 -14  20   -1.01    1.20
  -7 -14  19   -1.04    1.09
   7  14 -19    2.60    1.39
  -6 -14  18   -0.25    1.11
   6  14 -18   -0.40    1.17
  -5 -14  17   -0.43    1.03
   5  14 -17    1.16    1.17
  -4 -14  16    0.59    0.93
   4  14 -16   -1.03    1.12
  -3 -14  15   -1.32    0.86
   3  14 -15    1.20    1.09
  -2 -14  14    1.04    0.88
  -2 -14  14    0.84    0.77
   2  14 -14    0.49    0.98
  -1 -14  13    0.70    0.84
  -1 -14  13    1.31    0.63
  -1 -14  13    1.52    0.86
   1  14 -13    2.05    1.04
   0 -14  12    0.22    0.80
   0  14 -12    2.37    1.11
   1 -14  11   11.97    1.28
  -1  14 -11   13.97    1.50
   2 -14  10    0.27    0.86
  -2  14 -10    1.50    1.03
   3 -14   9    8.74    1.18
  -3  14  -9    7.67    1.26
   4 -14   8    3.96    1.05
  -4  14  -8    2.22    0.93
   5 -14   7   -0.63    0.91
  -5  14  -7    0.52    0.88
   6 -14   6   -1.13    0.91
  -6  14  -6    0.45    0.85
   7 -14   5    0.70    1.01
  -7  14  -5    0.15    0.81
   8 -14   4    1.86    1.09
  -8  14  -4    0.92    0.85
   9 -14   3    2.49    1.16
  -9  14  -3   -0.23    0.80
  10 -14   2    1.69    1.17
 -10  14  -2    0.11    0.86
  11 -14   1    1.72    1.27
  12 -14   0    2.25    1.34
  13 -14  -1   -0.83    1.23
  -8 -13  19    0.94    1.27
   8  13 -19   -1.13    1.22
  -7 -13  18    1.81    1.19
   7  13 -18    3.65    1.28
  -6 -13  17   -0.34    1.09
   6  13 -17   -0.28    1.14
  -5 -13  16    0.29    1.01
   5  13 -16    0.13    1.05
  -4 -13  15    1.29    0.93
   4  13 -15   -0.16    1.03
  -3 -13  14    0.25    0.89
  -3 -13  14    0.06    0.71
   3  13 -14    1.14    1.02
  -2 -13  13    5.30    1.03
  -2 -13  13    8.22    1.01
   2  13 -13    6.84    1.20
  -1 -13  12    5.56    0.96
  -1 -13  12    4.29    0.70
  -1 -13  12    4.94    0.93
   1  13 -12    3.15    1.09
   0 -13  11   -0.42    0.78
   0 -13  11    0.81    0.78
   0  13 -11    0.76    1.01
   1 -13  10    0.02    0.79
  -1  13 -10    1.60    1.01
   2 -13   9    5.46    1.02
  -2  13  -9    4.26    1.07
   3 -13   8    0.36    0.85
  -3  13  -8   -1.44    0.89
   4 -13   7    6.06    1.02
  -4  13  -7    5.19    1.04
   5 -13   6   -0.34    0.90
  -5  13  -6    1.10    0.80
   6 -13   5    4.96    1.08
  -6  13  -5    6.07    1.06
   7 -13   4   -0.85    0.87
  -7  13  -4   -0.18    0.80
   8 -13   3    1.07    0.92
  -8  13  -3    1.57    0.79
   9 -13   2   -1.29    1.00
  -9  13  -2    0.83    0.86
  10 -13   1   -0.51    1.10
 -10  13  -1    0.45    0.84
  11 -13   0    0.92    1.21
  12 -13  -1    2.58    1.30
  13 -13  -2    2.81    1.36
 -13  13   2   -0.04    0.96
  -9 -12  19    1.09    1.37
   9  12 -19   -0.15    1.24
  -8 -12  18   -0.25    1.16
   8  12 -18    2.02    1.24
  -7 -12  17   -0.01    1.06
   7  12 -17   -0.96    1.09
  -6 -12  16   -1.59    0.96
   6  12 -16    1.18    1.06
  -5 -12  15    0.10    0.98
   5  12 -15    0.08    0.99
  -4 -12  14    0.46    0.86
   4  12 -14   -0.21    0.96
  -3 -12  13    0.88    0.89
  -3 -12  13    2.01    0.78
   3  12 -13    0.76    1.00
  -2 -12  12   16.66    1.29
  -2 -12  12   19.48    1.53
   2  12 -12   17.26    1.50
  -1 -12  11    6.11    0.73
  -1 -12  11    5.13    0.96
  -1 -12  11    7.05    0.94
   1  12 -11    6.93    1.13
   0 -12  10   10.96    1.12
   0 -12  10   10.32    1.05
   0  12 -10   10.33    1.25
   1 -12   9    4.71    0.89
  -1  12  -9    2.33    0.97
   2 -12   8    1.38    0.83
  -2  12  -8    1.23    0.83
   3 -12   7   -0.22    0.79
  -3  12  -7   -0.01    0.85
   4 -12   6    9.76    1.17
  -4  12  -6   11.13    1.17
   5 -12   5   -0.14    0.88
  -5  12  -5    0.24    0.72
   6 -12   4    6.16    1.14
  -6  12  -4    5.75    0.97
   7 -12   3    6.41    1.21
  -7  12  -3    7.78    1.03
   8 -12   2    3.01    1.09
  -8  12  -2    6.77    0.98
   9 -12   1    0.52    1.05
  -9  12  -1   -1.05    0.72
  10 -12   0    1.12    1.10
 -10  12   0    0.24    0.74
  11 -12  -1    2.53    1.23
  12 -12  -2    0.41    1.13
  13 -12  -3    0.65    1.27
 -13  12   3   -0.53    0.97
  -9 -11  18   -0.97    1.23
   9  11 -18    0.04    1.16
  -8 -11  17   -0.76    1.11
   8  11 -17    0.11    1.12
  -7 -11  16   -1.15    1.02
   7  11 -16   -0.53    0.99
  -6 -11  15   -0.52    0.98
   6  11 -15   -1.12    0.92
  -5 -11  14    1.13    0.94
   5  11 -14    2.09    0.98
  -4 -11  13    4.37    0.81
  -4 -11  13    3.26    0.99
   4  11 -13    4.31    1.10
  -3 -11  12    1.53    0.90
  -3 -11  12    0.39    0.72
   3  11 -12    0.11    0.96
  -2 -11  11    0.22    0.75
  -2 -11  11    0.42    0.72
   2  11 -11    0.24    0.89
  -1 -11  10   11.57    0.99
  -1 -11  10   10.60    1.09
  -1 -11  10   13.48    1.14
   1  11 -10   11.79    1.21
   0 -11   9    0.63    0.71
   0 -11   9    0.24    0.69
   0  11  -9    0.82    0.84
   1 -11   8    6.98    0.93
  -1  11  -8    6.86    1.02
   2 -11   7    3.34    0.77
  -2  11  -7    4.92    0.92
   3 -11   6   16.34    1.35
  -3  11  -6   20.71    1.49
   4 -11   5    2.73    0.86
  -4  11  -5    2.30    0.81
   5 -11   4    3.19    0.95
  -5  11  -4    2.47    0.82
   6 -11   3   15.58    1.44
  -6  11  -3   17.81    1.38
   7 -11   2    9.57    1.28
  -7  11  -2   10.57    1.14
   8 -11   1    0.48    0.97
  -8  11  -1    0.27    0.72
   9 -11   0   -0.95    0.93
  -9  11   0    1.54    0.76
  10 -11  -1    0.32    1.03
 -10  11   1    0.09    0.74
  11 -11  -2    1.93    1.14
  12 -11  -3    1.69    1.17
  13 -11  -4   -0.54    1.25
 -13  11   4    2.38    1.05
  14 -11  -5   -0.82    1.37
 -14  11   5    0.19    1.05
 -10 -10  18    0.89    1.34
  10  10 -18    0.25    1.17
  -9 -10  17    0.98    1.22
   9  10 -17    0.66    1.13
  -8 -10  16    0.86    1.16
   8  10 -16    0.80    1.07
  -7 -10  15    1.07    1.00
   7  10 -15    1.15    1.00
  -6 -10  14    1.01    0.99
   6  10 -14   -0.67    0.89
  -5 -10  13    1.64    0.97
   5  10 -13    1.36    0.94
  -4 -10  12   15.89    1.20
  -4 -10  12   16.90    1.45
   4  10 -12   17.84    1.49
  -3 -10  11    1.06    0.81
  -3 -10  11    1.18    0.68
   3  10 -11   -0.47    0.86
  -2 -10  10    2.30    0.73
  -2 -10  10    1.52    0.79
   2  10 -10    1.77    0.86
  -1 -10   9    3.26    0.71
  -1 -10   9    2.60    0.77
   1  10  -9    2.69    0.83
   0 -10   8   16.44    1.23
   0 -10   8   22.11    1.30
   0  10  -8   19.44    1.43
   1 -10   7    2.37    0.69
  -1  10  -7    2.39    0.71
   2 -10   6    1.46    0.64
  -2  10  -6    1.48    0.75
   3 -10   5    1.60    0.71
  -3  10  -5    3.04    0.72
   4 -10   4   -0.53    0.63
  -4  10  -4   -0.47    0.64
   5 -10   3    4.70    0.95
  -5  10  -3    6.31    0.87
   7 -10   1    0.51    0.82
  -7  10  -1    0.05    0.69
   8 -10   0    4.11    1.10
  -8  10   0    4.61    0.86
   9 -10  -1    0.68    0.98
  -9  10   1    0.52    0.73
  10 -10  -2    0.30    0.98
 -10  10   2    1.32    0.72
  11 -10  -3   -0.71    1.02
  12 -10  -4    1.67    1.26
  13 -10  -5    1.07    1.22
 -13  10   5    2.06    1.10
  14 -10  -6   -1.31    1.23
 -14  10   6    0.65    1.11
 -11  -9  18    0.92    1.44
  11   9 -18    0.70    1.19
 -10  -9  17    1.30    1.34
  10   9 -17    0.13    1.12
  -9  -9  16   -0.30    1.20
   9   9 -16   -0.40    1.06
  -8  -9  15    0.79    1.14
   8   9 -15    0.89    1.04
  -7  -9  14    1.05    1.06
   7   9 -14    0.80    0.98
  -6  -9  13    9.23    1.33
   6   9 -13    8.12    1.19
  -5  -9  12    0.61    0.94
  -5  -9  12    2.98    0.69
   5   9 -12    0.86    0.96
  -4  -9  11   13.56    1.04
  -4  -9  11   12.66    1.26
   4   9 -11   11.53    1.23
  -3  -9  10    1.25    0.63
  -3  -9  10   -0.12    0.73
   3   9 -10    1.22    0.81
  -2  -9   9   27.20    1.43
  -2  -9   9   28.38    1.57
   2   9  -9   26.99    1.61
  -1  -9   8   38.05    1.76
  -1  -9   8   35.16    1.68
   1   9  -8   34.72    1.80
   0  -9   7    3.31    0.66
   0  -9   7    2.37    0.65
   0   9  -7    3.45    0.74
   1  -9   6    3.26    0.68
  -1   9  -6    4.49    0.73
   2  -9   5    0.91    0.58
  -2   9  -5    0.30    0.64
   3  -9   4   13.39    1.04
  -3   9  -4   12.90    1.03
   4  -9   3    7.04    0.86
  -4   9  -3    5.81    0.80
   5  -9   2    0.48    0.66
  -5   9  -2   -0.05    0.59
   6  -9   1    1.69    0.84
  -6   9  -1    1.76    0.69
   7  -9   0    6.03    1.09
  -7   9   0    6.02    0.89
   8  -9  -1    1.00    0.93
  -8   9   1    0.73    0.72
   9  -9  -2    1.35    0.89
  -9   9   2   -0.55    0.69
  10  -9  -3   -0.47    0.89
 -10   9   3   -0.48    0.60
  11  -9  -4    0.99    1.08
  12  -9  -5    0.48    1.12
 -12   9   5   -0.72    0.89
  13  -9  -6    0.83    1.26
 -13   9   6   -0.55    0.98
  14  -9  -7    0.33    1.37
 -14   9   7    0.16    1.10
 -11  -8  17    0.28    1.40
  11   8 -17    0.35    1.15
 -10  -8  16   -0.63    1.21
  10   8 -16    0.70    1.07
  -9  -8  15    0.73    1.20
   9   8 -15    0.41    0.96
  -8  -8  14   -1.63    1.01
   8   8 -14    0.20    0.95
  -7  -8  13    1.93    1.07
   7   8 -13    1.38    0.94
  -6  -8  12    1.33    0.92
   6   8 -12    1.18    0.90
  -5  -8  11    1.91    0.62
  -5  -8  11    0.43    0.91
   5   8 -11    2.85    0.92
  -4  -8  10   -0.20    0.80
  -4  -8  10    0.15    0.57
   4   8 -10   -0.31    0.74
  -3  -8   9    7.93    0.95
  -3  -8   9    9.59    0.82
   3   8  -9    9.67    0.99
  -2  -8   8   10.13    0.83
  -2  -8   8    9.84    0.91
   2   8  -8    9.91    0.94
  -1  -8   7    0.16    0.50
  -1  -8   7    1.43    0.61
   1   8  -7    0.98    0.62
   0  -8   6   -0.32    0.53
   0  -8   6    0.23    0.51
   0   8  -6    0.26    0.60
   1  -8   5   42.20    1.86
  -1   8  -5   42.59    1.93
   2  -8   4   35.15    1.64
  -2   8  -4   33.27    1.68
   3  -8   3   11.18    0.95
  -3   8  -3   11.40    0.92
   4  -8   2    6.98    0.82
  -4   8  -2    7.61    0.76
   5  -8   1    3.61    0.80
  -5   8  -1    3.66    0.67
   6  -8   0   15.81    1.34
  -6   8   0   17.92    1.25
   7  -8  -1    3.54    0.86
  -7   8   1    3.06    0.74
   8  -8  -2   -1.23    0.86
  -8   8   2   -0.22    0.63
   9  -8  -3    0.08    0.89
  -9   8   3   -0.53    0.62
  10  -8  -4    0.30    0.95
 -10   8   4   -0.37    0.58
  11  -8  -5    0.29    1.05
  12  -8  -6    2.06    1.15
 -12   8   6    0.89    1.00
  13  -8  -7   -1.10    1.13
 -13   8   7   -1.13    1.06
  14  -8  -8    0.44    1.28
 -14   8   8    0.61    1.18
 -11  -7  16   -0.04    1.30
  11   7 -16   -1.62    1.03
 -10  -7  15   -1.41    1.19
  10   7 -15    1.05    1.01
  -9  -7  14    2.00    1.25
   9   7 -14    3.01    1.06
  -8  -7  13    0.18    1.05
   8   7 -13   -0.38    0.85
  -7  -7  12    2.11    1.07
   7   7 -12    0.21    0.89
   7   7 -12    0.05    0.52
  -6  -7  11   -0.29    0.50
  -6  -7  11    0.01    0.93
   6   7 -11    0.98    0.88
  -5  -7  10   36.83    1.66
  -5  -7  10   38.30    2.14
   5   7 -10   35.93    1.89
  -4  -7   9    0.32    0.76
  -4  -7   9    1.75    0.51
   4   7  -9    0.07    0.70
  -3  -7   8   11.05    0.99
  -3  -7   8   11.32    0.83
   3   7  -8   10.04    0.93
  -2  -7   7    0.14    0.57
  -2  -7   7   -0.17    0.47
   2   7  -7   -0.58    0.59
  -1  -7   6   15.46    1.03
  -1  -7   6   14.72    0.93
   1   7  -6   15.30    1.06
   0  -7   5   30.92    1.43
   0  -7   5   30.83    1.42
   0   7  -5   29.80    1.47
   1  -7   4    1.63    0.50
  -1   7  -4    1.19    0.57
   2  -7   3    3.28    0.62
  -2   7  -3    2.87    0.56
   3  -7   2    4.91    0.70
  -3   7  -2    4.05    0.58
   4  -7   1    4.29    0.69
  -4   7  -1    3.65    0.62
   5  -7   0    1.72    0.69
  -5   7   0    2.16    0.59
   6  -7  -1    2.60    0.80
  -6   7   1    2.54    0.64
   7  -7  -2    3.22    0.88
  -7   7   2    3.61    0.70
   8  -7  -3    0.80    0.85
  -8   7   3   -0.01    0.59
   9  -7  -4    1.60    0.95
  -9   7   4    1.74    0.70
  10  -7  -5   -0.21    0.92
 -10   7   5    1.25    0.65
  11  -7  -6   -1.81    0.93
  12  -7  -7    1.24    1.11
 -12   7   7    0.66    1.00
  13  -7  -8    0.04    1.22
 -13   7   8    0.61    1.08
  14  -7  -9    0.27    1.35
 -14   7   9    0.41    1.22
 -12  -6  16   -0.13    1.37
  12   6 -16   -1.40    1.07
 -11  -6  15   -0.52    1.16
  11   6 -15    0.32    1.04
 -10  -6  14    0.36    1.23
  10   6 -14    0.90    1.01
  -9  -6  13    0.20    1.12
   9   6 -13    0.81    0.92
  -8  -6  12    1.16    1.05
   8   6 -12    2.74    0.94
  -7  -6  11    2.29    0.98
   7   6 -11    2.36    0.92
  -6  -6  10    6.09    1.12
  -6  -6  10    2.67    0.47
   6   6 -10    5.05    0.91
  -5  -6   9    1.43    0.50
  -5  -6   9    2.67    0.90
   5   6  -9    3.28    0.76
  -4  -6   8   32.08    1.82
  -4  -6   8   35.29    1.47
   4   6  -8   32.91    1.62
  -3  -6   7    1.67    0.65
  -3  -6   7    1.62    0.46
   3   6  -7    1.91    0.60
  -2  -6   6    0.47    0.48
  -2  -6   6    1.52    0.46
   2   6  -6    0.96    0.55
  -1  -6   5  113.16    4.00
  -1  -6   5  110.07    4.14
   1   6  -5  110.24    4.04
   0  -6   4   95.18    3.49
   0  -6   4   95.54    3.56
   0   6  -4   95.92    3.52
   1  -6   3    0.20    0.49
  -1   6  -3    0.61    0.52
   2  -6   2   17.17    1.04
  -2   6  -2   14.43    0.94
   3  -6   1    0.70    0.54
  -3   6  -1    0.93    0.49
   4  -6   0    0.46    0.51
  -4   6   0    0.94    0.49
   5  -6  -1    7.63    0.87
  -5   6   1    8.70    0.75
   6  -6  -2   -0.57    0.63
  -6   6   2   -0.28    0.50
   7  -6  -3    1.30    0.78
  -7   6   3    1.63    0.59
   8  -6  -4    2.14    0.88
  -8   6   4    2.37    0.68
   9  -6  -5   -0.12    0.90
  -9   6   5    0.18    0.62
  10  -6  -6   -0.92    0.87
  11  -6  -7   -0.52    1.01
 -11   6   7   -0.45    0.93
  12  -6  -8    2.62    1.17
 -12   6   8   -0.65    0.93
  13  -6  -9    1.47    1.17
 -13   6   9    0.88    1.11
  14  -6 -10    0.42    1.23
 -14   6  10    0.40    1.26
 -12  -5  15    1.46    1.27
  12   5 -15    0.09    1.16
 -11  -5  14    0.38    1.29
  11   5 -14    0.91    1.03
 -10  -5  13   -0.68    0.97
  10   5 -13    0.29    0.96
  -9  -5  12   -0.09    1.02
   9   5 -12    0.20    0.89
  -8  -5  11    0.96    0.92
   8   5 -11   -0.37    0.84
  -7  -5  10    2.75    1.01
   7   5 -10    2.42    0.87
  -6  -5   9    3.51    0.88
   6   5  -9    2.21    0.77
  -5  -5   8    0.03    0.71
  -5  -5   8   -0.28    0.31
   5   5  -8    0.31    0.62
  -4  -5   7    4.86    0.77
  -4  -5   7    3.24    0.47
   4   5  -7    3.32    0.55
   4   5  -7    2.98    0.63
  -3  -5   6   10.71    0.71
  -3  -5   6    9.57    0.88
   3   5  -6   10.27    0.79
   3   5  -6   10.78    0.78
  -2  -5   5   13.58    1.04
  -2  -5   5   15.26    0.84
   2   5  -5   15.71    0.96
   2   5  -5   15.49    0.90
  -1  -5   4   16.39    0.97
  -1  -5   4   14.71    0.80
   1   5  -4   12.56    0.85
   1   5  -4   12.14    0.90
   0  -5   3   77.04    2.75
   0  -5   3   72.19    2.82
   0   5  -3   75.14    2.78
   1  -5   2    1.73    0.48
  -1   5  -2    1.84    0.46
   2  -5   1    1.30    0.52
  -2   5  -1    1.06    0.46
   3  -5   0    2.87    0.55
  -3   5   0    2.88    0.53
   4  -5  -1    0.01    0.54
  -4   5   1   -0.04    0.44
   5  -5  -2    6.73    0.81
  -5   5   2    9.25    0.75
   6  -5  -3    8.14    0.92
  -6   5   3    9.66    0.81
   7  -5  -4    4.66    0.88
  -7   5   4    5.93    0.75
   8  -5  -5   -0.40    0.83
  -8   5   5    0.83    0.62
   9  -5  -6    0.59    0.91
  -9   5   6    1.04    0.62
  10  -5  -7    0.73    0.93
  11  -5  -8    3.48    1.17
 -11   5   8    2.04    1.05
  12  -5  -9   -0.87    1.01
 -12   5   9   -0.59    1.01
  13  -5 -10    1.21    1.25
 -13   5  10   -0.65    1.12
  14  -5 -11   -1.45    1.30
 -14   5  11   -0.21    1.16
 -13  -4  15   -0.96    1.35
  13   4 -15   -0.34    1.21
 -12  -4  14    3.28    1.43
  12   4 -14    3.40    1.16
 -11  -4  13   -0.69    1.11
  11   4 -13    0.84    0.99
 -10  -4  12    1.47    1.10
  10   4 -12    0.13    0.93
  -9  -4  11    2.34    1.08
   9   4 -11    2.37    0.92
  -8  -4  10   -0.39    0.87
   8   4 -10    0.27    0.82
  -7  -4   9    9.84    0.74
  -7  -4   9    7.10    1.09
   7   4  -9    7.91    1.00
  -6  -4   8   -0.65    0.77
  -6  -4   8    0.35    0.15
   6   4  -8    0.31    0.65
  -5  -4   7   10.53    1.04
   5   4  -7   11.33    0.82
   5   4  -7   10.85    0.92
  -4  -4   6   96.04    3.82
   4   4  -6   92.71    3.54
   4   4  -6   97.95    3.53
   4   4  -6  101.24    3.54
  -3  -4   5   15.40    1.12
   3   4  -5   16.06    0.85
   3   4  -5   15.38    0.89
  -2  -4   4   -0.35    0.33
  -2  -4   4   -0.10    0.50
   2   4  -4    0.21    0.36
   2   4  -4   -0.28    0.42
  -1  -4   3   44.44    1.86
  -1  -4   3   45.84    1.71
   1   4  -3   45.34    1.76
   1   4  -3   45.61    1.72
   0  -4   2  333.87   11.49
   0  -4   2  333.79   11.82
   0   4  -2  336.80   11.50
   0   4  -2  343.90   11.50
   1  -4   1  243.15    8.31
  -1   4  -1  239.98    8.31
   2  -4   0   12.97    0.86
  -2   4   0   13.08    0.84
   3  -4  -1   79.86    3.04
  -3   4   1   82.20    2.99
   4  -4  -2   11.36    0.92
  -4   4   2   12.73    0.87
   5  -4  -3    0.37    0.55
  -5   4   3   -0.45    0.43
   6  -4  -4    1.51    0.67
  -6   4   4    1.25    0.50
   7  -4  -5    0.53    0.72
  -7   4   5    0.97    0.55
   8  -4  -6    6.22    0.99
  -8   4   6    4.72    0.76
   9  -4  -7    1.41    0.95
  -9   4   7    0.84    0.59
  10  -4  -8   -1.04    0.91
 -10   4   8    0.34    0.91
  11  -4  -9   -0.18    0.95
 -11   4   9   -1.25    0.93
  12  -4 -10    0.20    1.04
 -12   4  10   -0.17    1.06
  13  -4 -11   -0.41    1.14
 -13   4  11    0.08    1.02
  14  -4 -12    0.72    1.30
 -14   4  12    1.16    1.30
 -13  -3  14    1.39    1.43
  13   3 -14   -0.23    1.15
 -12  -3  13   -0.36    1.18
  12   3 -13   -0.34    1.04
 -11  -3  12    0.85    1.14
  11   3 -12    0.18    0.93
 -10  -3  11   -0.13    0.96
  10   3 -11    0.84    0.91
  -9  -3  10    2.07    1.04
   9   3 -10    2.31    0.90
  -8  -3   9    0.42    0.88
   8   3  -9   -0.43    0.81
  -7  -3   8    2.47    0.90
  -7  -3   8    1.65    0.45
   7   3  -8    1.06    0.72
  -6  -3   7   26.85    1.67
  -6  -3   7   21.40    1.07
   6   3  -7   28.22    1.38
   6   3  -7   27.30    1.27
  -5  -3   6    0.42    0.17
  -5  -3   6   -0.01    0.57
   5   3  -6    0.02    0.51
   5   3  -6    0.12    0.43
  -4  -3   5    4.98    0.67
   4   3  -5    5.33    0.52
   4   3  -5    6.00    0.59
  -3  -3   4  139.21    5.16
   3   3  -4  141.75    4.89
   3   3  -4  139.84    4.88
  -2  -3   3   61.62    2.43
   2   3  -3   61.57    2.23
   2   3  -3   62.64    2.24
  -1  -3   2   14.65    0.74
  -1  -3   2   13.25    0.62
   1   3  -2   15.04    0.67
   1   3  -2   15.36    0.69
   0  -3   1  200.83    6.55
   0  -3   1  181.46    6.53
   1  -3   0  272.52    9.04
  -1   3   0  249.48    9.03
  -1   3   0  270.61    9.03
   2  -3  -1  106.59    3.77
  -2   3   1  104.74    3.74
   3  -3  -2    4.14    0.58
  -3   3   2    4.39    0.52
   4  -3  -3   14.45    0.99
  -4   3   3   15.40    0.89
   5  -3  -4    6.39    0.76
  -5   3   4    7.61    0.69
   6  -3  -5    1.22    0.65
  -6   3   5    2.18    0.52
   7  -3  -6   -0.17    0.76
  -7   3   6    0.46    0.56
   8  -3  -7   -0.35    0.86
  -8   3   7   -0.41    0.54
   9  -3  -8    1.33    0.89
  -9   3   8    0.02    0.56
  10  -3  -9    0.26    0.91
 -10   3   9    0.34    0.90
  11  -3 -10    1.07    1.10
 -11   3  10    1.36    1.07
  12  -3 -11    1.40    1.12
 -12   3  11    1.47    1.15
  13  -3 -12    0.92    1.26
 -13   3  12   -1.66    1.07
 -13  -2  13   -0.77    1.23
  13   2 -13    1.23    1.11
 -12  -2  12    0.49    1.20
  12   2 -12   -0.11    1.02
 -11  -2  11   -0.05    1.10
  11   2 -11    0.82    0.95
 -10  -2  10   -0.04    0.97
  10   2 -10   -0.12    0.84
  -9  -2   9    1.17    0.92
   9   2  -9    2.53    0.92
  -8  -2   8   26.07    1.78
   8   2  -8   23.47    1.49
  -7  -2   7   15.56    0.84
  -7  -2   7   15.53    1.36
   7   2  -7   13.45    1.09
  -6  -2   6    4.74    0.45
  -6  -2   6    3.46    0.78
   6   2  -6    4.35    0.69
   6   2  -6    4.75    0.59
  -5  -2   5   21.06    1.22
  -5  -2   5   16.00    0.79
   5   2  -5   17.80    0.94
   5   2  -5   19.11    1.01
  -4  -2   4   14.00    0.68
  -4  -2   4   13.72    1.01
   4   2  -4   16.63    0.80
   4   2  -4   15.51    0.85
  -3  -2   3    2.81    0.54
  -3  -2   3    3.28    0.27
   3   2  -3    2.58    0.35
   3   2  -3    2.39    0.39
   3   2  -3    2.38    0.34
  -2  -2   2  144.95    5.22
   2   2  -2  143.55    4.94
   2   2  -2  145.24    4.94
  -1  -2   1   71.46    2.38
  -1  -2   1   68.15    2.54
   0  -2   0   -0.24    0.11
   0   2   0   -0.16    0.09
   0   2   0   -0.14    0.11
   1  -2  -1   -0.28    0.19
   1  -2  -1   -0.14    0.23
  -1   2   1   -0.18    0.15
  -1   2   1   -0.13    0.17
   2  -2  -2 1000.00   33.73
  -2   2   2  993.76   34.04
   3  -2  -3   59.53    2.31
  -3   2   3   61.91    2.30
   4  -2  -4   44.33    1.82
  -4   2   4   41.81    1.75
   5  -2  -5   10.11    0.87
  -5   2   5   10.48    0.84
   6  -2  -6    0.86    0.70
  -6   2   6    2.13    0.50
   7  -2  -7   -0.19    0.72
  -7   2   7    0.14    0.48
   8  -2  -8    3.76    0.95
  -8   2   8    3.89    0.69
   9  -2  -9    5.30    1.05
  -9   2   9    3.83    1.02
  -9   2   9    3.93    0.71
  10  -2 -10    3.96    1.07
 -10   2  10    2.31    1.05
  11  -2 -11   -0.58    1.07
 -11   2  11   -0.82    0.92
  12  -2 -12   -0.11    1.15
 -12   2  12    0.09    1.13
  13  -2 -13    0.53    1.29
 -13   2  13    0.20    1.17
 -13  -1  12   -0.73    1.22
  13   1 -12    1.23    1.16
 -12  -1  11    0.05    1.15
  12   1 -11   -0.25    0.96
 -11  -1  10    1.08    1.10
  11   1 -10    1.88    0.95
 -10  -1   9    1.16    0.92
  10   1  -9    2.28    0.92
  -9  -1   8    8.26    1.25
   9   1  -8    5.96    0.98
  -8  -1   7    0.43    0.78
  -8  -1   7   -0.46    0.39
   8   1  -7   -0.82    0.74
  -7  -1   6   -0.71    0.74
  -7  -1   6   -0.01    0.35
   7   1  -6   -0.26    0.63
   7   1  -6    0.47    0.50
  -6  -1   5   11.58    0.67
  -6  -1   5   12.57    1.08
   6   1  -5   12.66    0.86
   6   1  -5   13.32    0.91
  -5  -1   4    7.09    0.76
  -5  -1   4    6.98    0.49
   5   1  -4    8.93    0.71
   5   1  -4    7.72    0.63
  -4  -1   3    1.15    0.25
  -4  -1   3    0.72    0.53
   4   1  -3    0.85    0.33
   4   1  -3    0.80    0.39
  -3  -1   2   49.91    1.99
  -3  -1   2   48.93    1.70
   3   1  -2   48.19    1.77
   3   1  -2   49.71    1.76
  -2  -1   1  666.75   23.23
  -1  -1   0   -0.10    0.13
   1   1   0   -0.06    0.14
   0  -1  -1   -0.20    0.08
   0  -1  -1   -0.03    0.10
   0   1   1   -0.11    0.08
   0   1   1   -0.14    0.07
   2  -1  -3   16.21    0.88
  -2   1   3   16.95    0.84
   3  -1  -4   50.94    2.04
  -3   1   4   51.99    2.00
   4  -1  -5    6.50    0.70
  -4   1   5    5.99    0.58
   5  -1  -6    7.13    0.78
  -5   1   6    8.33    0.68
   6  -1  -7    9.72    0.96
  -6   1   7    9.75    0.81
   7  -1  -8   27.95    1.65
  -7   1   8   27.70    1.41
   8  -1  -9   -0.37    0.85
  -8   1   9   -0.41    0.54
  -8   1   9   -0.73    0.86
   9  -1 -10    1.04    0.94
  -9   1  10   -0.18    0.83
  10  -1 -11    0.94    0.97
 -10   1  11   -0.19    0.97
  11  -1 -12    1.91    1.10
 -11   1  12    0.64    1.11
  12  -1 -13    2.27    1.28
 -12   1  13    3.11    1.23
  13  -1 -14   -1.15    1.18
 -13   1  14    0.58    1.24
 -14   0  12    2.17    1.24
  14   0 -12    1.38    1.20
 -13   0  11   -0.33    1.20
  13   0 -11    0.80    1.06
 -12   0  10   -0.29    1.11
  12   0 -10    1.25    1.00
 -11   0   9   -0.24    1.00
  11   0  -9    0.18    0.90
 -10   0   8   -0.12    0.86
  10   0  -8    0.68    0.81
  -9   0   7    4.48    0.98
   9   0  -7    4.11    0.90
  -8   0   6   -0.22    0.81
  -8   0   6   -0.43    0.39
   8   0  -6   -0.04    0.69
  -7   0   5   23.73    1.62
   7   0  -5   23.90    1.30
   7   0  -5   22.92    1.25
  -6   0   4    0.23    0.17
  -6   0   4    0.06    0.57
   6   0  -4    0.23    0.48
   6   0  -4    0.85    0.44
  -5   0   3   -0.29    0.48
  -5   0   3    0.11    0.17
   5   0  -3    0.01    0.31
   5   0  -3   -0.44    0.39
  -4   0   2    0.92    0.50
  -4   0   2    0.59    0.21
   4   0  -2    0.87    0.36
   4   0  -2    1.06    0.33
  -3   0   1   54.88    2.17
  -3   0   1   52.55    1.92
   3   0  -1   56.55    1.96
   3   0  -1   56.30    1.97
   2   0   0   35.89    1.31
   2   0   0   39.11    1.31
  -1   0  -1    0.00    0.08
  -1   0  -1   -0.24    0.11
  -1   0  -1   -0.11    0.02
   1   0   1   -0.09    0.07
   1   0   1   -0.17    0.07
   1   0   1   -0.23    0.10
   0   0  -2    0.14    0.13
   0   0  -2   -0.03    0.11
   0   0  -2   -0.22    0.13
   0   0   2   -0.12    0.12
   0   0   2    0.29    0.18
   0   0   2   -0.29    0.09
   1   0  -3   58.17    2.30
  -1   0   3   62.56    2.29
  -1   0   3   70.50    2.29
   2   0  -4    8.84    0.75
  -2   0   4   10.31    0.67
   3   0  -5   34.64    1.58
  -3   0   5   38.06    1.53
   4   0  -6    2.09    0.58
  -4   0   6    1.45    0.46
   5   0  -7   15.85    1.14
  -5   0   7   19.59    1.07
   6   0  -8    1.19    0.72
  -6   0   8    2.15    0.53
   7   0  -9   19.86    1.53
  -7   0   9   18.49    1.19
  -7   0   9   20.13    1.50
   8   0 -10    0.40    0.90
  -8   0  10    2.00    0.96
  -8   0  10    1.35    0.61
  -8   0  10    1.88    0.64
   9   0 -11    4.09    1.04
  -9   0  11    2.04    1.05
  10   0 -12   -0.86    0.96
 -10   0  12   -1.50    0.96
  11   0 -13    2.97    1.25
 -11   0  13    0.99    1.13
  12   0 -14    0.52    1.24
 -12   0  14    0.00    1.02
  13   0 -15    0.59    1.33
 -13   0  15    2.13    1.36
 -14   1  11   -1.12    1.21
  14  -1 -11    2.91    1.24
 -13   1  10    0.62    1.18
  13  -1 -10    0.16    1.02
 -12   1   9    2.40    1.09
  12  -1  -9    3.80    1.07
 -11   1   8    0.52    1.00
  11  -1  -8    1.05    0.89
 -10   1   7    1.90    0.90
  10  -1  -7    2.39    0.87
  -9   1   6    1.15    0.90
   9  -1  -6   -0.37    0.76
  -8   1   5    8.76    1.06
   8  -1  -5   11.61    1.00
  -7   1   4   -0.14    0.08
  -7   1   4    0.11    0.70
   7  -1  -4    0.16    0.47
   7  -1  -4    0.10    0.57
  -6   1   3    0.72    0.60
  -6   1   3    0.05    0.11
   6  -1  -3    0.73    0.49
   6  -1  -3    0.72    0.41
  -5   1   2    3.34    0.60
   5  -1  -2    3.60    0.46
   5  -1  -2    3.67    0.50
  -4   1   1    0.68    0.47
   4  -1  -1    1.92    0.42
   4  -1  -1    1.70    0.37
  -3   1   0   -0.10    0.08
  -3   1   0    0.37    0.38
   3  -1   0   -0.32    0.31
   3  -1   0    0.16    0.28
  -2   1  -1  135.86    4.27
  -2   1  -1  133.00    4.40
   2  -1   1  112.46    4.26
   2  -1   1  114.83    4.27
   0   1  -3    0.25    0.28
   0   1  -3   -0.26    0.21
   0   1  -3   -0.09    0.20
   0  -1   3   -0.09    0.28
   0  -1   3    0.00    0.17
   0  -1   3   -0.17    0.17
   0  -1   3    0.28    0.17
   1   1  -4  243.10    8.28
  -1  -1   4  238.99    8.28
   2   1  -5    1.07    0.51
  -2  -1   5    1.10    0.42
   3   1  -6    5.01    0.66
  -3  -1   6    5.00    0.56
   4   1  -7   15.97    1.09
  -4  -1   7   18.28    1.00
   5   1  -8   19.66    1.25
  -5  -1   8   19.92    1.10
   6   1  -9    2.45    0.80
  -6  -1   9    1.52    0.80
  -6  -1   9    1.19    0.53
  -6  -1   9    1.35    0.57
   7   1 -10   -0.93    0.81
  -7  -1  10    0.71    0.58
  -7  -1  10    0.97    0.90
  -7  -1  10    0.08    0.53
   8   1 -11    0.70    0.99
  -8  -1  11    1.18    0.66
  -8  -1  11    0.21    0.85
   9   1 -12    8.29    1.24
  -9  -1  12    4.26    1.17
  10   1 -13    1.42    1.07
 -10  -1  13    2.35    1.15
  11   1 -14   -0.59    1.04
 -11  -1  14    1.00    1.04
  12   1 -15    1.27    1.24
 -12  -1  15    2.85    1.30
 -13  -1  16   -0.78    1.21
 -14   2  10    2.83    1.35
  14  -2 -10   -0.60    1.20
 -13   2   9    1.55    1.19
  13  -2  -9    1.92    1.11
 -12   2   8    3.66    1.19
  12  -2  -8    3.32    1.05
 -11   2   7    1.20    0.99
  11  -2  -7    0.27    0.87
 -10   2   6    0.69    0.87
  10  -2  -6    1.08    0.84
  -9   2   5    0.49    0.85
   9  -2  -5    1.65    0.81
  -8   2   4    5.83    0.97
   8  -2  -4    5.53    0.82
  -7   2   3    1.43    0.36
  -7   2   3    1.73    0.72
   7  -2  -3    1.33    0.61
  -6   2   2    2.25    0.38
  -6   2   2    1.47    0.59
   6  -2  -2    2.74    0.60
   6  -2  -2    2.47    0.50
  -5   2   1   -0.23    0.44
  -5   2   1    0.31    0.32
   5  -2  -1   -0.30    0.38
   5  -2  -1   -0.05    0.42
  -4   2   0   16.88    1.02
  -4   2   0   16.44    0.82
   4  -2   0   16.33    0.88
   4  -2   0   15.99    0.88
  -3   2  -1    2.58    0.36
  -3   2  -1    2.26    0.38
   3  -2   1    2.51    0.40
   3  -2   1    2.46    0.42
  -2   2  -2  916.54   32.16
  -2   2  -2  931.67   31.25
   2  -2   2  922.58   31.26
   2  -2   2  927.52   31.26
  -1   2  -3  189.49    6.16
   1  -2   3  176.50    6.16
   1  -2   3  169.79    6.16
   0   2  -4  359.07   13.34
   0   2  -4  374.07   12.68
   0  -2   4  373.65   13.35
   0  -2   4  380.29   12.69
   1   2  -5   22.75    1.15
   1   2  -5   19.52    1.09
  -1  -2   5   21.35    1.04
   2   2  -6    5.66    0.64
  -2  -2   6    7.19    0.62
   3   2  -7   37.42    1.69
  -3  -2   7   35.04    1.58
  -3  -2   7   38.83    1.60
   4   2  -8    4.56    0.74
  -4  -2   8    5.90    0.66
  -4  -2   8    4.34    0.60
   5   2  -9   36.40    1.78
  -5  -2   9   37.44    1.93
  -5  -2   9   34.51    1.63
   6   2 -10    0.13    0.83
  -6  -2  10    1.21    0.58
  -6  -2  10    1.38    0.83
   7   2 -11    8.47    1.16
  -7  -2  11    9.45    1.20
  -7  -2  11    9.09    0.94
   8   2 -12    0.53    0.92
  -8  -2  12    0.14    0.87
  -8  -2  12    1.17    0.64
   9   2 -13    1.07    0.99
  -9  -2  13   -0.46    0.98
  10   2 -14    0.96    1.07
 -10  -2  14    1.45    1.12
  11   2 -15    0.84    1.16
 -11  -2  15    0.05    1.06
  12   2 -16    0.01    1.23
 -12  -2  16    1.19    1.29
 -14   3   9    1.06    1.23
  14  -3  -9   -0.33    1.13
 -13   3   8   -0.44    1.08
  13  -3  -8    1.80    1.08
 -12   3   7    0.49    1.03
  12  -3  -7    2.14    1.03
 -11   3   6   -0.70    0.87
  11  -3  -6   -0.02    0.82
 -10   3   5    3.62    0.96
  10  -3  -5    2.79    0.90
  -9   3   4    6.45    0.60
  -9   3   4    8.03    1.09
   9  -3  -4    7.77    1.00
  -8   3   3    3.91    0.86
  -8   3   3    3.07    0.53
   8  -3  -3    4.71    0.82
  -7   3   2   10.29    0.97
  -7   3   2   11.97    0.81
   7  -3  -2   11.44    0.95
  -6   3   1    5.62    0.54
  -6   3   1    5.38    0.69
   6  -3  -1    5.68    0.70
  -5   3   0    0.73    0.36
  -5   3   0    1.84    0.49
   5  -3   0    2.38    0.47
   5  -3   0    1.61    0.50
  -4   3  -1   18.25    0.94
  -4   3  -1   18.02    0.93
   4  -3   1   17.92    1.00
   4  -3   1   17.38    0.96
  -3   3  -2   57.64    2.20
  -3   3  -2   58.26    2.22
   3  -3   2   59.17    2.25
   3  -3   2   61.55    2.29
  -2   3  -3    0.52    0.42
   2  -3   3    0.32    0.41
   2  -3   3   -0.41    0.34
  -1   3  -4   10.32    0.80
   1  -3   4    9.94    0.43
   1  -3   4    9.23    0.73
   0   3  -5    2.63    0.52
   0  -3   5    3.29    0.37
   0  -3   5    3.55    0.47
   0  -3   5    3.43    0.56
   1   3  -6    3.36    0.58
   1   3  -6    1.91    0.52
  -1  -3   6    2.83    0.52
  -1  -3   6    3.14    0.48
   2   3  -7   24.98    1.33
   2   3  -7   24.21    1.31
  -2  -3   7   25.31    1.22
  -2  -3   7   26.33    1.28
   3   3  -8    1.51    0.62
  -3  -3   8    0.27    0.45
  -3  -3   8    0.09    0.53
   4   3  -9    3.28    0.77
  -4  -3   9    4.16    0.61
  -4  -3   9    4.65    0.77
   5   3 -10    3.67    0.86
  -5  -3  10    3.57    0.86
  -5  -3  10    4.54    0.68
   6   3 -11    6.40    1.06
  -6  -3  11    5.87    0.77
  -6  -3  11    4.67    0.96
   7   3 -12   -0.42    0.90
  -7  -3  12    0.59    0.62
  -7  -3  12    0.77    0.97
   8   3 -13    0.97    0.96
  -8  -3  13    1.05    0.92
   9   3 -14    0.27    1.02
  -9  -3  14    1.11    0.95
  10   3 -15    0.59    1.18
 -10  -3  15   -0.18    0.99
  11   3 -16    0.72    1.18
 -11  -3  16   -0.20    1.03
  12   3 -17    0.33    1.31
 -12  -3  17    0.17    1.17
 -14   4   8    0.00    1.13
  14  -4  -8   -1.52    1.09
 -13   4   7   -0.81    0.99
  13  -4  -7    0.32    1.05
 -12   4   6    0.20    0.98
  12  -4  -6    2.12    0.97
 -11   4   5    2.26    0.95
  11  -4  -5    0.63    0.91
 -10   4   4    6.19    1.07
  10  -4  -4    8.58    1.09
  -9   4   3   -0.20    0.47
  -9   4   3   -0.03    0.78
   9  -4  -3   -0.64    0.78
  -8   4   2    4.77    0.61
  -8   4   2    4.81    0.86
   8  -4  -2    4.96    0.87
  -7   4   1   10.36    0.76
  -7   4   1   11.48    0.95
   7  -4  -1   10.78    0.96
  -6   4   0   -0.08    0.50
  -6   4   0    1.48    0.43
   6  -4   0    1.31    0.58
  -5   4  -1    0.87    0.42
  -5   4  -1    1.34    0.43
   5  -4   1    0.87    0.51
  -4   4  -2    0.36    0.38
   4  -4   2   -0.32    0.45
  -3   4  -3   57.50    2.24
   3  -4   3   57.97    2.28
  -2   4  -4   58.40    2.26
   2  -4   4   56.73    2.24
  -1   4  -5   11.57    0.98
   1  -4   5   12.40    0.59
   1  -4   5   12.80    0.91
   0   4  -6   14.45    1.04
   0  -4   6   14.40    0.77
   0  -4   6   15.03    1.06
   0  -4   6   14.73    0.91
   1   4  -7   13.46    0.99
   1   4  -7   10.90    0.81
  -1  -4   7   11.15    0.84
  -1  -4   7   11.95    0.88
  -1  -4   7   12.37    0.95
   2   4  -8    4.49    0.73
   2   4  -8    5.71    0.63
  -2  -4   8    4.26    0.60
  -2  -4   8    5.70    0.66
   3   4  -9    0.96    0.66
   3   4  -9    0.63    0.53
  -3  -4   9    1.06    0.53
  -3  -4   9    0.67    0.52
   4   4 -10    2.43    0.80
  -4  -4  10    2.58    0.61
  -4  -4  10    2.49    0.75
   5   4 -11    0.75    0.82
  -5  -4  11   -0.46    0.79
  -5  -4  11    1.04    0.59
   6   4 -12    3.13    0.99
  -6  -4  12    3.21    0.74
  -6  -4  12    4.15    0.96
   7   4 -13   -0.04    0.91
  -7  -4  13   -0.02    0.62
  -7  -4  13   -0.19    0.84
   8   4 -14   -0.59    0.97
  -8  -4  14    0.80    0.96
   9   4 -15   -0.13    1.06
  -9  -4  15   -0.30    1.07
  10   4 -16    0.68    1.19
 -10  -4  16   -0.36    1.10
  11   4 -17    1.25    1.23
 -11  -4  17    0.26    1.10
  12   4 -18    0.31    1.38
 -12  -4  18    0.23    1.33
 -14   5   7   -0.32    1.08
  14  -5  -7    1.04    1.21
 -13   5   6   -0.99    1.04
  13  -5  -6    1.95    1.04
 -12   5   5   -0.01    0.91
  12  -5  -5   -0.45    0.91
 -11   5   4    1.21    0.87
  11  -5  -4    1.17    0.94
 -10   5   3    1.73    0.87
  10  -5  -3    3.65    0.92
  -9   5   2    7.19    1.02
  -9   5   2    8.10    0.76
   9  -5  -2    8.16    1.08
  -8   5   1   11.73    1.08
  -8   5   1   11.85    0.87
   8  -5  -1   13.30    1.13
  -7   5   0    3.70    0.57
  -7   5   0    4.39    0.70
   7  -5   0    3.35    0.78
  -6   5  -1    0.14    0.46
  -6   5  -1    0.28    0.46
   6  -5   1    0.35    0.60
  -5   5  -2   11.06    0.84
   5  -5   2   11.78    0.99
  -4   5  -3    9.66    0.79
   4  -5   3    7.90    0.76
  -3   5  -4   24.35    1.27
   3  -5   4   23.53    1.25
  -2   5  -5   14.01    1.04
   2  -5   5   14.39    0.98
  -1   5  -6    0.42    0.59
   1  -5   6   -0.75    0.50
   1  -5   6    0.08    0.27
   0   5  -7    0.51    0.56
   0  -5   7    0.78    0.58
   0  -5   7    0.60    0.35
   0  -5   7    1.40    0.55
   1   5  -8   -0.10    0.54
  -1  -5   8    0.42    0.42
  -1  -5   8    0.91    0.52
  -1  -5   8    0.25    0.52
   2   5  -9   25.86    1.42
   2   5  -9   23.34    1.29
  -2  -5   9   23.56    1.28
  -2  -5   9   24.01    1.30
   3   5 -10    6.21    0.72
   3   5 -10    5.50    0.87
  -3  -5  10    5.38    0.77
  -3  -5  10    6.84    0.76
   4   5 -11    6.82    0.95
   4   5 -11    6.78    0.80
  -4  -5  11    8.99    0.86
  -4  -5  11    7.64    0.92
   5   5 -12    6.41    1.09
   5   5 -12    8.14    0.90
  -5  -5  12    8.20    1.08
  -5  -5  12    7.75    0.90
   6   5 -13    0.17    1.02
  -6  -5  13    1.51    0.68
  -6  -5  13    1.85    0.93
   7   5 -14    0.17    1.02
  -7  -5  14    0.34    0.62
  -7  -5  14    2.12    0.99
   8   5 -15   -0.72    0.99
  -8  -5  15    1.45    1.07
   9   5 -16   -0.44    1.12
  -9  -5  16    1.52    1.13
  10   5 -17   -1.15    1.16
 -10  -5  17    0.65    1.19
  11   5 -18    1.21    1.34
 -11  -5  18   -0.95    1.28
 -14   6   6    0.96    1.18
  14  -6  -6    0.74    1.18
 -13   6   5    0.41    1.01
  13  -6  -5    0.91    1.04
 -12   6   4    1.82    0.92
  12  -6  -4    0.04    1.00
 -11   6   3    0.05    0.80
  11  -6  -3   -0.76    0.88
 -10   6   2    1.15    0.78
  10  -6  -2    0.20    0.90
  -9   6   1    6.78    0.96
  -9   6   1    6.62    0.76
   9  -6  -1    6.46    1.05
  -8   6   0    0.58    0.62
  -8   6   0    0.26    0.53
   8  -6   0   -0.64    0.74
  -7   6  -1    6.73    0.73
  -7   6  -1    5.80    0.71
   7  -6   1    4.69    0.85
  -6   6  -2    6.98    0.72
   6  -6   2    6.69    0.83
  -5   6  -3    0.08    0.48
   5  -6   3   -0.45    0.55
  -4   6  -4    0.25    0.48
   4  -6   4   -0.61    0.52
  -3   6  -5    0.92    0.56
   3  -6   5    1.22    0.53
  -2   6  -6    1.76    0.57
   2  -6   6    2.02    0.56
  -1   6  -7   42.18    1.87
   1  -6   7   43.68    1.64
   1  -6   7   41.74    1.87
   0   6  -8   -0.72    0.58
   0  -6   8   -0.22    0.58
   0  -6   8    0.63    0.40
   0  -6   8    0.37    0.55
   1   6  -9    1.65    0.73
  -1  -6   9    2.59    0.63
  -1  -6   9    2.67    0.53
  -1  -6   9    3.01    0.61
   2   6 -10   11.37    1.06
  -2  -6  10   12.80    0.98
  -2  -6  10   12.61    1.03
   3   6 -11    8.19    0.77
   3   6 -11    5.68    0.96
  -3  -6  11    7.21    0.87
  -3  -6  11    7.44    0.86
   4   6 -12    4.46    1.00
   4   6 -12    5.00    0.74
  -4  -6  12    3.94    0.89
  -4  -6  12    4.41    0.78
   5   6 -13   -0.49    0.90
   5   6 -13    0.00    0.68
  -5  -6  13    0.08    0.84
  -5  -6  13    0.68    0.64
   6   6 -14   -0.10    0.74
   6   6 -14    1.00    1.02
  -6  -6  14   -0.28    0.87
  -6  -6  14   -0.45    0.63
   7   6 -15    1.82    1.03
  -7  -6  15    2.80    1.05
   8   6 -16    3.04    1.14
  -8  -6  16    1.83    1.11
   9   6 -17    1.04    1.13
  -9  -6  17    0.30    1.12
  10   6 -18    0.31    1.19
 -10  -6  18   -2.11    1.13
  11   6 -19    0.52    1.33
 -11  -6  19   -0.16    1.28
 -14   7   5    0.44    1.10
  14  -7  -5   -1.77    1.16
 -13   7   4   -0.65    0.93
  13  -7  -4   -0.24    1.10
 -12   7   3    1.17    0.95
  12  -7  -3    0.72    0.97
 -11   7   2   -0.78    0.75
  11  -7  -2    0.97    0.93
 -10   7   1    2.77    0.84
  10  -7  -1    2.70    0.95
  -9   7   0    1.70    0.72
  -9   7   0    1.69    0.65
   9  -7   0    1.11    0.93
  -8   7  -1    3.62    0.68
  -8   7  -1    2.13    0.67
   8  -7   1    2.13    0.86
  -7   7  -2   -0.79    0.51
   7  -7   2   -0.44    0.71
  -6   7  -3    2.58    0.61
   6  -7   3    2.05    0.74
  -5   7  -4    5.10    0.68
   5  -7   4    4.85    0.78
  -4   7  -5    0.20    0.56
   4  -7   5    0.46    0.60
  -3   7  -6    3.83    0.71
   3  -7   6    4.10    0.73
  -2   7  -7    7.34    0.45
  -2   7  -7    6.55    0.86
   2  -7   7    5.41    0.78
  -1   7  -8    0.09    0.60
   1  -7   8   -0.42    0.36
   1  -7   8    0.23    0.57
   0   7  -9    0.51    0.66
   0  -7   9    0.22    0.58
   0  -7   9   -0.21    0.62
   0  -7   9    0.17    0.43
   1   7 -10    5.25    0.89
  -1  -7  10    6.27    0.68
  -1  -7  10    6.29    0.77
  -1  -7  10    4.78    0.71
   2   7 -11   -0.23    0.69
  -2  -7  11    0.27    0.60
  -2  -7  11    0.26    0.57
   3   7 -12   10.00    1.14
  -3  -7  12    8.27    0.96
  -3  -7  12    9.27    0.97
   4   7 -13    0.19    0.64
   4   7 -13    0.11    0.93
  -4  -7  13   -0.48    0.75
  -4  -7  13    0.08    0.70
   5   7 -14    0.40    0.70
   5   7 -14    1.30    1.07
  -5  -7  14    1.24    0.90
  -5  -7  14    0.56    0.72
   6   7 -15    0.90    0.99
  -6  -7  15    0.90    0.69
  -6  -7  15    1.09    0.94
   7   7 -16    2.82    1.12
  -7  -7  16    0.70    1.02
   8   7 -17    1.59    1.14
  -8  -7  17    2.86    1.18
   9   7 -18    0.38    1.23
  -9  -7  18    0.26    1.14
  10   7 -19    1.62    1.29
 -10  -7  19    1.14    1.27
 -14   8   4   -0.04    0.99
  14  -8  -4    0.16    1.15
 -13   8   3    2.18    1.03
  13  -8  -3    0.77    1.13
 -12   8   2    0.05    0.87
  12  -8  -2    0.14    1.06
 -11   8   1    1.54    0.81
  11  -8  -1    2.34    1.08
 -10   8   0    1.90    0.78
  10  -8   0    2.67    0.96
  -9   8  -1    3.40    0.76
  -9   8  -1    2.67    0.69
   9  -8   1    3.66    0.98
  -8   8  -2    0.55    0.62
  -8   8  -2    0.06    0.59
   8  -8   2    0.11    0.89
  -7   8  -3    6.55    0.82
   7  -8   3    4.97    0.96
  -6   8  -4    0.06    0.61
   6  -8   4   -0.46    0.64
  -5   8  -5    7.81    0.84
   5  -8   5    5.65    0.89
  -4   8  -6    0.99    0.60
   4  -8   6    0.31    0.65
  -3   8  -7   41.94    2.05
   3  -8   7   43.51    1.99
  -2   8  -8    0.87    0.65
   2  -8   8    1.25    0.69
  -1   8  -9   22.60    1.40
   1  -8   9   22.79    1.39
   1  -8   9   23.29    1.10
   0   8 -10    4.86    0.90
   0  -8  10    4.87    0.79
   0  -8  10    4.06    0.76
   0  -8  10    3.47    0.58
   1   8 -11    2.17    0.90
  -1  -8  11    1.60    0.70
  -1  -8  11    0.82    0.67
  -1  -8  11    1.63    0.60
   2   8 -12    1.92    0.90
  -2  -8  12    1.94    0.73
  -2  -8  12    1.46    0.75
   3   8 -13    1.15    0.87
  -3  -8  13    2.29    0.81
  -3  -8  13    1.56    0.74
   4   8 -14    2.39    1.01
  -4  -8  14    2.28    0.79
  -4  -8  14    1.18    0.82
   5   8 -15    0.50    1.03
  -5  -8  15    0.90    0.70
  -5  -8  15    1.15    0.87
   6   8 -16   -0.06    1.03
  -6  -8  16   -1.49    0.87
   7   8 -17    0.13    1.16
  -7  -8  17    0.33    1.00
   8   8 -18    1.21    1.19
  -8  -8  18    1.34    1.10
   9   8 -19   -0.11    1.21
  -9  -8  19   -0.10    1.18
  10   8 -20   -1.85    1.25
 -10  -8  20   -2.74    1.20
 -14   9   3    0.46    1.04
  14  -9  -3   -0.99    1.18
 -13   9   2   -0.44    0.83
  13  -9  -2   -0.45    1.12
 -12   9   1    0.33    0.85
  12  -9  -1    0.03    1.08
 -11   9   0    0.78    0.77
  11  -9   0    0.73    1.00
 -10   9  -1    0.43    0.72
  10  -9   1   -1.04    0.86
  -9   9  -2    2.42    0.71
  -9   9  -2    2.66    0.75
   9  -9   2    3.56    1.04
  -8   9  -3    0.06    0.64
  -8   9  -3   -0.58    0.54
   8  -9   3    0.05    0.86
  -7   9  -4    0.41    0.64
   7  -9   4   -0.16    0.81
  -6   9  -5    7.05    0.89
   6  -9   5    6.59    1.03
  -5   9  -6    1.15    0.71
   5  -9   6    0.02    0.76
  -4   9  -7    3.56    0.84
   4  -9   7    3.62    0.85
  -3   9  -8   27.65    1.71
   3  -9   8   28.72    1.66
  -2   9  -9    0.28    0.79
   2  -9   9    0.81    0.73
  -1   9 -10    8.02    1.05
   1  -9  10    9.23    1.00
   1  -9  10    9.25    0.78
   0   9 -11   -0.29    0.83
   0  -9  11   -0.15    0.55
   0  -9  11    0.00    0.69
   0  -9  11    0.23    0.70
   1   9 -12   19.19    1.54
  -1  -9  12   19.33    1.25
  -1  -9  12   21.51    1.40
  -1  -9  12   18.44    1.37
   2   9 -13   -0.85    0.92
  -2  -9  13    0.09    0.72
  -2  -9  13   -0.65    0.69
   3   9 -14    0.24    0.99
  -3  -9  14    1.05    0.73
  -3  -9  14    0.42    0.76
   4   9 -15    3.28    1.12
  -4  -9  15    2.70    0.81
  -4  -9  15    2.76    0.90
   5   9 -16    0.44    1.02
  -5  -9  16    1.39    0.90
  -5  -9  16    0.02    0.67
   6   9 -17   -1.28    1.03
  -6  -9  17    0.03    0.96
   7   9 -18    1.88    1.25
  -7  -9  18    1.66    1.07
   8   9 -19    0.24    1.21
  -8  -9  19   -0.36    1.10
   9   9 -20   -0.77    1.31
  -9  -9  20    0.07    1.22
 -14  10   2   -0.94    0.94
  14 -10  -2   -0.24    1.24
 -13  10   1    2.00    0.93
  13 -10  -1    3.68    1.34
 -12  10   0    0.85    0.80
  12 -10   0   -0.93    1.02
 -11  10  -1   -1.36    0.68
  11 -10   1   -0.99    0.98
 -10  10  -2    1.29    0.71
  10 -10   2    0.81    0.98
  -9  10  -3    0.39    0.58
  -9  10  -3    0.10    0.67
   9 -10   3   -0.13    0.89
  -8  10  -4    2.61    0.60
  -8  10  -4    2.02    0.75
   8 -10   4    1.71    0.99
  -7  10  -5    0.28    0.69
   7 -10   5    0.44    0.87
  -6  10  -6    0.39    0.70
   6 -10   6    1.84    0.89
  -5  10  -7    3.78    0.88
   5 -10   7    2.91    0.92
  -4  10  -8    0.18    0.74
   4 -10   8   -0.43    0.78
  -3  10  -9    0.03    0.84
   3 -10   9    0.69    0.80
  -2  10 -10    8.06    1.08
   2 -10  10    7.34    1.04
  -1  10 -11    2.06    0.87
   1 -10  11    0.98    0.54
   1 -10  11    1.14    0.82
   0  10 -12    7.55    1.17
   0 -10  12    7.24    1.01
   0 -10  12    7.00    0.92
   0 -10  12    7.24    0.79
   1  10 -13    1.26    0.95
  -1 -10  13    0.40    0.77
  -1 -10  13    0.15    0.66
  -1 -10  13    0.86    0.73
   2  10 -14    0.41    1.07
  -2 -10  14    0.67    0.77
  -2 -10  14    2.03    0.78
   3  10 -15   -0.11    0.99
  -3 -10  15    0.10    0.80
  -3 -10  15   -0.24    0.76
   4  10 -16   -0.38    1.02
  -4 -10  16    0.17    0.74
  -4 -10  16   -0.88    0.76
   5  10 -17    0.36    1.08
  -5 -10  17    0.34    0.89
   6  10 -18    0.94    1.23
  -6 -10  18    0.84    1.00
   7  10 -19    0.15    1.20
  -7 -10  19    0.57    1.08
   8  10 -20   -0.52    1.30
  -8 -10  20   -1.54    1.10
   9  10 -21   -1.70    1.25
  -9 -10  21   -0.06    1.24
  14 -11  -1    0.17    1.28
 -13  11   0    0.94    0.86
  13 -11   0    1.93    1.30
 -12  11  -1    0.29    0.79
  12 -11   1    0.87    1.15
 -11  11  -2   -0.06    0.70
  11 -11   2    0.63    1.06
 -10  11  -3    0.02    0.62
  10 -11   3    1.50    1.05
  -9  11  -4    0.23    0.54
  -9  11  -4    0.39    0.67
   9 -11   4    0.37    0.94
  -8  11  -5    1.29    0.53
  -8  11  -5    0.80    0.75
   8 -11   5    2.24    0.98
  -7  11  -6   -0.67    0.75
   7 -11   6    1.16    0.87
  -6  11  -7    3.93    0.93
   6 -11   7    2.87    1.01
  -5  11  -8    3.54    0.97
   5 -11   8    3.12    0.93
  -4  11  -9    6.96    1.05
   4 -11   9    4.95    1.05
  -3  11 -10    1.15    0.95
   3 -11  10    0.16    0.88
  -2  11 -11    3.80    1.09
   2 -11  11    3.36    0.98
  -1  11 -12    5.67    1.15
   1 -11  12    3.64    0.90
   1 -11  12    4.61    0.98
   1 -11  12    4.48    0.70
   0  11 -13    0.60    0.94
   0 -11  13   -0.22    0.75
   0 -11  13    1.39    0.66
   0 -11  13    0.16    0.81
   1  11 -14   -1.83    1.00
  -1 -11  14    0.82    0.68
  -1 -11  14   -1.13    0.72
  -1 -11  14    0.08    0.80
   2  11 -15    5.37    1.24
  -2 -11  15    3.33    0.91
  -2 -11  15    2.29    0.83
   3  11 -16   -0.66    1.04
  -3 -11  16    0.08    0.78
  -3 -11  16   -0.45    0.77
   4  11 -17   -0.32    1.04
  -4 -11  17    1.89    0.95
  -4 -11  17    0.69    0.80
   5  11 -18   -0.50    1.09
  -5 -11  18    1.12    1.01
   6  11 -19   -2.39    1.06
  -6 -11  19   -0.87    0.96
   7  11 -20   -1.71    1.17
  -7 -11  20    0.41    1.08
   8  11 -21   -0.29    1.38
  -8 -11  21    0.67    1.29
  14 -12   0    0.15    1.27
  13 -12   1   -1.00    1.24
  12 -12   2    2.76    1.29
  11 -12   3    1.29    1.10
  10 -12   4    0.09    1.05
  -9  12  -5    1.03    0.79
   9 -12   5    1.61    1.03
  -8  12  -6   -0.18    0.78
   8 -12   6    1.11    0.96
  -7  12  -7    7.89    1.08
   7 -12   7    7.45    1.16
  -6  12  -8    2.04    0.89
   6 -12   8    0.93    0.89
  -5  12  -9    2.35    0.98
   5 -12   9    5.35    1.08
  -4  12 -10   -1.15    0.81
   4 -12  10    0.17    0.91
  -3  12 -11   -0.18    0.98
   3 -12  11    0.83    0.92
  -2  12 -12    2.61    1.13
   2 -12  12    2.86    1.00
  -1  12 -13   -0.21    0.92
   1 -12  13    0.89    0.65
   1 -12  13   -0.77    0.84
   1 -12  13   -0.10    0.76
   0  12 -14    0.49    1.07
   0 -12  14    1.14    0.80
   0 -12  14   -0.54    0.67
   0 -12  14   -0.33    0.82
   1  12 -15    6.96    1.27
  -1 -12  15    4.55    0.86
  -1 -12  15    5.20    0.86
  -1 -12  15    4.68    0.99
   2  12 -16    1.33    1.15
  -2 -12  16   -0.43    0.77
  -2 -12  16    0.54    0.79
   3  12 -17    1.71    1.19
  -3 -12  17    1.14    0.85
  -3 -12  17    0.73    0.82
   4  12 -18   -1.11    1.11
  -4 -12  18   -1.00    0.86
   5  12 -19    0.65    1.21
  -5 -12  19    2.26    1.03
   6  12 -20    1.07    1.25
  -6 -12  20    1.24    1.11
   7  12 -21    0.37    1.24
  -7 -12  21    1.44    1.22
  13 -13   2    0.60    1.27
  12 -13   3    1.22    1.25
  11 -13   4    1.09    1.13
  10 -13   5   -0.17    1.04
  -9  13  -6    9.98    1.15
   9 -13   6    8.25    1.36
  -8  13  -7    0.86    0.79
   8 -13   7    1.67    0.95
  -7  13  -8    2.18    0.88
   7 -13   8    1.87    1.05
  -6  13  -9    3.68    0.96
   6 -13   9    2.56    1.05
  -5  13 -10    5.67    1.15
   5 -13  10    6.39    1.19
  -4  13 -11    4.77    1.16
   4 -13  11    5.38    1.15
  -3  13 -12   -0.47    0.91
   3 -13  12   -0.08    0.83
  -2  13 -13    2.92    1.17
   2 -13  13    2.65    1.03
  -1  13 -14   -0.93    1.02
   1 -13  14   -0.65    0.78
   1 -13  14   -0.68    0.85
   0  13 -15    1.37    1.07
   0 -13  15   -0.28    0.66
   0 -13  15    0.71    0.78
   0 -13  15    1.46    0.87
   1  13 -16    2.87    1.19
  -1 -13  16    3.05    0.82
  -1 -13  16    2.36    0.92
  -1 -13  16    0.46    0.76
   2  13 -17    1.20    1.17
  -2 -13  17    0.09    0.81
  -2 -13  17   -0.44    0.79
   3  13 -18   -0.31    1.18
  -3 -13  18    0.13    0.85
  -3 -13  18    1.56    0.85
   4  13 -19    2.68    1.41
  -4 -13  19    3.05    1.01
   5  13 -20    2.02    1.32
  -5 -13  20    0.41    1.03
   6  13 -21   -1.22    1.26
  -6 -13  21    1.20    1.15
   7  13 -22    0.70    1.39
  -7 -13  22   -1.52    1.06
  13 -14   3    1.32    1.34
  12 -14   4    0.83    1.22
  11 -14   5   -1.39    1.09
  10 -14   6    1.04    1.16
  -9  14  -7   -0.37    0.87
   9 -14   7    0.21    1.10
  -8  14  -8   -1.81    0.79
   8 -14   8    0.88    1.08
  -7  14  -9    2.44    0.92
   7 -14   9   -0.40    1.00
  -6  14 -10    0.97    0.90
   6 -14  10   -0.27    0.94
  -5  14 -11    0.43    1.02
   5 -14  11   -0.02    0.94
  -4  14 -12    2.10    1.10
   4 -14  12    2.59    1.03
  -3  14 -13    0.64    0.98
   3 -14  13    1.75    0.99
  -2  14 -14    0.18    1.06
   2 -14  14    1.11    0.95
  -1  14 -15    3.23    1.21
   1 -14  15    2.15    0.98
   1 -14  15    2.73    0.94
   0  14 -16   -1.38    1.09
   0 -14  16   -1.77    0.81
   0 -14  16   -0.41    0.77
   0 -14  16   -0.74    0.70
   1  14 -17    0.49    1.16
  -1 -14  17    0.68    0.79
  -1 -14  17    0.73    0.89
   2  14 -18    0.39    1.18
  -2 -14  18    0.92    0.87
  -2 -14  18    1.71    0.92
   3  14 -19    0.73    1.26
  -3 -14  19   -0.10    0.87
   4  14 -20    0.87    1.33
  -4 -14  20   -0.89    0.92
   5  14 -21   -0.76    1.33
  -5 -14  21   -1.08    1.00
   6  14 -22    0.26    1.38
  -6 -14  22    0.28    1.16
  12 -15   5    0.06    1.28
  11 -15   6   -0.85    1.20
  10 -15   7   -0.11    1.15
  -9  15  -8   -0.25    0.86
   9 -15   8    1.07    1.15
  -8  15  -9   -0.12    0.92
   8 -15   9    0.32    1.09
  -7  15 -10    1.28    0.95
   7 -15  10   -1.34    1.00
  -6  15 -11   -0.32    0.97
   6 -15  11   -0.14    1.04
  -5  15 -12   -0.05    0.94
   5 -15  12    1.38    1.03
  -4  15 -13    1.39    1.13
   4 -15  13    0.46    1.01
  -3  15 -14    2.64    1.19
   3 -15  14    1.87    1.01
  -2  15 -15    0.04    1.09
   2 -15  15   -0.43    0.93
   2 -15  15    0.94    0.93
  -1  15 -16    1.99    1.21
   1 -15  16    0.59    0.90
   1 -15  16    0.68    0.96
   0  15 -17    0.76    1.18
   0 -15  17    0.40    0.94
   1  15 -18    0.65    1.15
  -1 -15  18   -1.05    0.88
   2  15 -19    0.49    1.24
  -2 -15  19   -0.61    0.85
   3  15 -20   -0.24    1.28
  -3 -15  20    1.05    0.99
   4  15 -21   -1.72    1.28
  -4 -15  21   -0.06    0.99
   5  15 -22   -0.42    1.38
  -5 -15  22   -0.72    1.02
  12 -16   6   -0.38    1.35
  11 -16   7   -0.46    1.26
  10 -16   8    2.62    1.29
  -9  16  -9    1.43    0.97
   9 -16   9   -0.14    1.20
  -8  16 -10    0.83    0.96
   8 -16  10   -0.60    1.06
  -7  16 -11    0.17    0.97
   7 -16  11    1.09    1.14
  -6  16 -12    0.74    1.06
   6 -16  12    1.99    1.13
  -5  16 -13   -1.64    1.02
   5 -16  13    0.22    0.95
  -4  16 -14    1.00    1.18
   4 -16  14   -0.05    1.00
  -3  16 -15    0.19    1.19
   3 -16  15    1.12    0.94
  -2  16 -16    0.60    1.21
   2 -16  16    0.33    1.00
   2 -16  16    1.47    0.96
  -1  16 -17    1.72    1.22
   1 -16  17   -0.81    0.92
   0  16 -18    0.17    1.26
   0 -16  18    1.83    1.01
   1  16 -19   -0.72    1.18
  -1 -16  19    1.51    1.05
   2  16 -20    0.29    1.26
   3  16 -21    0.98    1.36
   4  16 -22   -0.25    1.36
  11 -17   8   -0.55    1.34
  10 -17   9   -1.02    1.19
   9 -17  10   -0.24    1.23
  -8  17 -11    0.55    1.04
   8 -17  11    0.52    1.15
  -7  17 -12    1.03    1.05
   7 -17  12   -1.24    1.05
  -6  17 -13   -0.43    1.10
   6 -17  13    1.69    1.17
  -5  17 -14   -0.07    1.15
   5 -17  14   -0.18    1.05
  -4  17 -15    0.71    1.18
   4 -17  15   -0.16    0.94
  -3  17 -16   -1.12    1.18
   3 -17  16    0.86    1.07
  -2  17 -17    1.44    1.29
   2 -17  17   -0.76    0.94
  -1  17 -18    0.27    1.17
   1 -17  18    1.05    1.02
   0  17 -19   -1.08    1.13
   0 -17  19   -0.24    0.98
   1  17 -20   -1.18    1.26
   2  17 -21    1.16    1.39
   3  17 -22   -0.39    1.37
  10 -18  10   -0.63    1.32
   9 -18  11   -0.86    1.24
  -8  18 -12   -0.42    1.03
   8 -18  12   -0.04    1.21
  -7  18 -13   -0.50    1.07
   7 -18  13    2.76    1.24
  -6  18 -14    2.16    1.23
   6 -18  14    2.07    1.14
  -5  18 -15    0.05    1.20
   5 -18  15    0.95    1.02
  -4  18 -16   -0.65    1.24
   4 -18  16    1.11    1.12
  -3  18 -17    2.61    1.31
   3 -18  17   -1.29    1.03
  -2  18 -18   -1.27    1.23
   2 -18  18    0.25    1.01
  -1  18 -19    0.97    1.34
   1 -18  19    1.61    1.09
   0  18 -20   -0.58    1.38
   1  18 -21    0.49    1.44
   9 -19  12   -0.57    1.33
  -8  19 -13    0.49    1.17
   8 -19  13    3.37    1.36
  -7  19 -14   -0.24    1.13
   7 -19  14    0.57    1.18
  -6  19 -15   -1.20    1.14
   6 -19  15   -1.54    1.09
  -5  19 -16   -0.65    1.27
   5 -19  16    2.83    1.27
  -4  19 -17   -1.34    1.25
   4 -19  17   -0.98    1.06
  -3  19 -18   -1.05    1.25
   3 -19  18    0.68    1.15
  -2  19 -19    0.72    1.44
   2 -19  19    0.77    1.10
  -1  19 -20   -0.49    1.37
   0  19 -21   -0.21    1.45
  -7  20 -15   -1.30    1.17
   7 -20  15   -0.27    1.23
  -6  20 -16    0.12    1.34
   6 -20  16   -0.59    1.18
  -5  20 -17   -3.71    1.19
   5 -20  17    1.77    1.26
  -4  20 -18   -2.70    1.31
   4 -20  18    1.39    1.22
  -3  20 -19   -0.35    1.39
   3 -20  19    1.21    1.17
  -3  22 -16    0.51    1.41
   4 -22  15    2.41    1.25
  -4  22 -15   -0.29    1.28
   5 -22  14    0.14    1.17
  -5  22 -14    1.28    1.32
   6 -22  13    0.09    1.17
  -6  22 -13   -2.10    1.13
   0  21 -18    0.52    1.46
  -1  21 -17   -2.36    1.28
  -2  21 -16    2.78    1.47
   3 -21  15    0.05    1.07
  -3  21 -15   -2.78    1.17
   4 -21  14    0.38    1.12
  -4  21 -14    2.26    1.23
   5 -21  13   -1.69    1.06
  -5  21 -13   -0.16    1.19
   6 -21  12    0.44    1.15
  -6  21 -12    0.32    1.15
   7 -21  11    1.18    1.25
  -7  21 -11   -2.04    1.04
   8 -21  10    1.07    1.27
  -8  21 -10   -0.80    1.12
   2  20 -19    0.25    1.39
   1  20 -18   -0.79    1.36
   0  20 -17    0.47    1.38
  -1  20 -16    0.12    1.30
  -2  20 -15    0.63    1.27
   3 -20  14    0.15    1.04
  -3  20 -14   -0.53    1.08
   4 -20  13    0.28    1.08
  -4  20 -13   -0.34    1.20
   5 -20  12    0.93    1.12
  -5  20 -12   -1.20    1.09
   6 -20  11    0.50    1.10
  -6  20 -11   -0.32    1.10
   7 -20  10   -0.55    1.16
  -7  20 -10    0.09    1.08
   8 -20   9    0.95    1.27
  -8  20  -9    0.84    1.13
   9 -20   8    0.65    1.28
  -9  20  -8    0.00    1.08
  10 -20   7    0.28    1.36
  -3 -19  19    1.02    1.24
   3  19 -19    0.75    1.36
   2  19 -18    1.56    1.38
   1  19 -17    0.14    1.29
   0  19 -16    0.07    1.28
  -1  19 -15    0.32    1.24
   2 -19  14    0.66    0.99
  -2  19 -14   -0.59    1.23
   3 -19  13   -0.85    0.95
  -3  19 -13   -0.62    1.12
   4 -19  12    1.01    1.07
  -4  19 -12    1.39    1.18
   5 -19  11    0.03    1.03
  -5  19 -11   -1.28    1.05
   6 -19  10    0.28    1.11
  -6  19 -10   -0.25    1.06
   7 -19   9    0.35    1.17
  -7  19  -9   -1.34    0.98
   8 -19   8   -0.95    1.19
  -8  19  -8    0.17    1.04
   9 -19   7   -1.28    1.18
  -9  19  -7    1.24    1.05
  10 -19   6   -0.77    1.31
  -4 -18  19   -0.26    1.15
   4  18 -19   -2.10    1.19
  -3 -18  18    0.12    1.07
   3  18 -18    0.12    1.25
  -2 -18  17    5.93    1.29
   2  18 -17    5.04    1.47
   1  18 -16   -0.27    1.21
   0  18 -15   -0.35    1.15
   1 -18  14    0.08    0.88
  -1  18 -14    0.55    1.16
   2 -18  13    0.43    0.95
  -2  18 -13    1.01    1.21
   3 -18  12    0.19    0.91
  -3  18 -12   -0.26    1.10
   4 -18  11    1.10    1.03
  -4  18 -11   -1.11    1.04
   5 -18  10   -0.62    0.99
  -5  18 -10    0.37    1.04
   6 -18   9   -0.55    1.04
  -6  18  -9   -0.15    1.02
   7 -18   8   -0.95    1.00
  -7  18  -8   -1.01    0.95
   8 -18   7    2.07    1.12
  -8  18  -7    0.76    1.02
   9 -18   6    2.67    1.26
  -9  18  -6   -0.76    0.94
  10 -18   5   -0.32    1.23
 -10  18  -5   -0.49    0.92
  11 -18   4   -0.07    1.35
  -5 -17  19   -1.76    1.15
   5  17 -19   -0.28    1.24
  -4 -17  18   -0.01    1.09
   4  17 -18   -2.38    1.10
  -3 -17  17    1.28    1.07
   3  17 -17    0.77    1.18
  -2 -17  16    0.01    0.98
   2  17 -16    1.47    1.22
   1  17 -15    0.50    1.19
   0 -17  14    1.08    0.89
   0  17 -14    1.42    1.22
   1 -17  13   -0.56    0.86
  -1  17 -13    0.39    1.12
   2 -17  12    1.60    0.92
  -2  17 -12    2.09    1.18
   3 -17  11   -0.23    0.87
  -3  17 -11    0.98    1.07
   4 -17  10   -0.35    0.93
  -4  17 -10   -1.26    1.00
   5 -17   9    0.43    0.93
  -5  17  -9   -0.26    0.96
   6 -17   8    0.79    1.06
  -6  17  -8    0.85    1.02
   7 -17   7    1.20    1.18
  -7  17  -7    2.75    1.04
   8 -17   6   -1.13    0.98
  -8  17  -6    0.39    0.96
   9 -17   5   -1.82    1.11
  -9  17  -5   -0.42    0.92
  10 -17   4    1.65    1.32
 -10  17  -4    1.18    0.96
  11 -17   3   -1.14    1.25
  12 -17   2   -1.14    1.33
  -6 -16  19   -0.08    1.16
   6  16 -19   -0.39    1.20
  -5 -16  18   -0.52    1.13
   5  16 -18   -0.97    1.15
  -4 -16  17    0.68    1.08
   4  16 -17    1.51    1.20
  -3 -16  16    0.89    0.97
   3  16 -16    1.33    1.14
  -2 -16  15    0.35    0.96
   2  16 -15    0.29    1.17
  -1 -16  14   -0.53    0.87
  -1 -16  14    0.15    0.82
   1  16 -14    1.52    1.14
   0 -16  13    0.70    0.82
   0  16 -13   -1.48    1.00
   1 -16  12    2.84    0.91
  -1  16 -12    1.53    1.12
   2 -16  11    0.25    0.84
  -2  16 -11    1.80    0.99
   3 -16  10   -0.64    0.89
  -3  16 -10    0.16    1.01
   4 -16   9    3.04    1.04
  -4  16  -9    2.31    1.04
   5 -16   8   -0.04    0.94
  -5  16  -8   -1.39    0.85
   6 -16   7    0.78    1.03
  -6  16  -7    0.92    0.96
   7 -16   6    1.83    1.12
  -7  16  -6    0.82    0.84
   8 -16   5    1.10    1.14
  -8  16  -5    0.32    0.91
   9 -16   4    0.59    1.18
  -9  16  -4   -1.37    0.83
  10 -16   3   -0.23    1.20
 -10  16  -3    0.24    0.93
  11 -16   2    0.28    1.30
  12 -16   1   -0.47    1.31
  -7 -15  19    0.68    1.25
   7  15 -19   -3.64    1.10
  -6 -15  18   -0.46    1.05
   6  15 -18   -1.35    1.20
  -5 -15  17   -0.10    1.08
   5  15 -17   -1.79    1.12
  -4 -15  16    1.70    1.08
   4  15 -16    0.75    1.15
  -3 -15  15   -0.11    0.89
   3  15 -15   -1.04    1.06
  -2 -15  14    2.29    0.93
   2  15 -14    2.19    1.09
  -1 -15  13   -0.62    0.85
  -1 -15  13    0.37    0.79
   1  15 -13   -0.77    0.97
   0 -15  12    0.20    0.83
   0  15 -12    0.21    1.03
   1 -15  11    1.17    0.85
  -1  15 -11    1.96    1.10
   2 -15  10    0.19    0.82
  -2  15 -10    0.56    1.03
   3 -15   9    0.85    0.90
  -3  15  -9    0.21    0.96
   4 -15   8    1.22    0.95
  -4  15  -8    1.72    0.91
   5 -15   7   -0.35    0.84
  -5  15  -7    0.70    0.82
   6 -15   6   -0.39    0.97
  -6  15  -6   -0.22    0.87
   7 -15   5   -0.20    1.03
  -7  15  -5    0.50    0.87
   8 -15   4   -0.47    1.01
  -8  15  -4   -0.52    0.86
   9 -15   3   -1.76    1.10
  -9  15  -3   -0.08    0.87
  10 -15   2    0.20    1.17
 -10  15  -2   -0.11    0.87
  11 -15   1    1.32    1.28
  12 -15   0    0.28    1.31
  13 -15  -1    0.15    1.33
  -8 -14  19    2.32    1.33
   8  14 -19    1.33    1.36
  -7 -14  18    1.35    1.21
   7  14 -18    0.52    1.18
  -6 -14  17    0.73    1.16
   6  14 -17    1.44    1.24
  -5 -14  16    0.85    1.05
   5  14 -16   -0.36    1.06
  -4 -14  15   -0.10    0.92
   4  14 -15    0.45    1.08
  -3 -14  14   -0.76    0.90
   3  14 -14    0.47    0.99
  -2 -14  13    1.25    0.75
  -2 -14  13    0.63    0.90
   2  14 -13    1.92    1.01
  -1 -14  12    1.20    0.61
  -1 -14  12   -0.37    0.84
  -1 -14  12   -0.50    0.75
   1  14 -12   -0.59    0.98
   0 -14  11    3.77    0.91
   0  14 -11    2.41    1.08
   1 -14  10    0.58    0.82
  -1  14 -10   -0.87    0.88
   2 -14   9    5.66    1.03
  -2  14  -9    7.76    1.22
   3 -14   8    6.89    1.11
  -3  14  -8    6.68    1.17
   4 -14   7    1.60    0.99
  -4  14  -7    3.05    0.92
   5 -14   6    7.01    1.18
  -5  14  -6    7.97    1.07
   6 -14   5    2.62    1.05
  -6  14  -5    0.43    0.86
   7 -14   4    2.10    1.05
  -7  14  -4    1.26    0.87
   8 -14   3    1.97    1.10
  -8  14  -3    0.99    0.85
   9 -14   2    0.50    1.13
  -9  14  -2    2.08    0.92
  10 -14   1   -1.04    1.09
 -10  14  -1   -0.96    0.79
  11 -14   0   -0.73    1.16
  12 -14  -1    0.14    1.19
  13 -14  -2    1.08    1.34
  -9 -13  19   -2.47    1.23
   9  13 -19    2.25    1.28
  -8 -13  18    2.96    1.32
   8  13 -18    3.52    1.29
  -7 -13  17    0.30    1.14
   7  13 -17    1.01    1.20
  -6 -13  16   -0.24    1.03
   6  13 -16    0.43    1.13
  -5 -13  15    0.69    0.99
   5  13 -15    2.26    1.17
  -4 -13  14    0.54    0.90
   4  13 -14   -0.47    0.98
  -3 -13  13    1.39    0.91
  -3 -13  13    0.39    0.69
   3  13 -13    0.15    1.01
  -2 -13  12    6.67    0.97
  -2 -13  12    8.42    1.15
   2  13 -12    8.10    1.17
  -1 -13  11   11.81    0.88
  -1 -13  11   11.80    1.22
  -1 -13  11   13.60    1.19
   1  13 -11   11.83    1.35
   0 -13  10    8.23    1.02
   0  13 -10    7.71    1.12
   1 -13   9   -1.98    0.70
  -1  13  -9    1.24    0.98
   2 -13   8    5.39    0.97
  -2  13  -8    4.66    1.07
   3 -13   7    1.54    0.86
  -3  13  -7    1.26    0.84
   4 -13   6    7.23    1.06
  -4  13  -6    6.94    1.06
   5 -13   5    1.34    0.89
  -5  13  -5    2.06    0.91
   6 -13   4    1.76    1.05
  -6  13  -4    1.27    0.85
   7 -13   3    1.40    1.02
  -7  13  -3   -0.19    0.79
   8 -13   2    0.88    1.01
  -8  13  -2    0.79    0.80
   9 -13   1    0.60    1.08
  -9  13  -1    0.85    0.86
  10 -13   0    0.65    1.14
 -10  13   0   -1.30    0.76
  11 -13  -1    1.74    1.23
  12 -13  -2    2.05    1.25
  13 -13  -3   -1.18    1.25
  -9 -12  18    4.95    1.50
   9  12 -18    3.88    1.31
  -8 -12  17    2.80    1.30
   8  12 -17    1.83    1.15
  -7 -12  16    0.75    1.14
   7  12 -16    0.30    1.07
  -6 -12  15    0.27    1.04
   6  12 -15    0.41    1.07
  -5 -12  14    1.87    0.98
   5  12 -14   -0.35    0.94
  -4 -12  13    1.56    0.99
   4  12 -13   -0.76    0.92
  -3 -12  12    0.85    0.69
  -3 -12  12    1.71    0.94
   3  12 -12    0.97    0.98
  -2 -12  11    4.92    1.04
  -2 -12  11    7.73    0.95
   2  12 -11    6.39    1.11
  -1 -12  10    6.00    0.91
  -1 -12  10    6.03    0.98
   1  12 -10    7.85    1.10
   0 -12   9    0.62    0.73
   0  12  -9    0.10    0.90
   1 -12   8    1.13    0.76
  -1  12  -8    1.35    0.91
   2 -12   7   24.10    1.52
  -2  12  -7   21.53    1.57
   3 -12   6   11.08    1.17
  -3  12  -6   11.12    1.18
   4 -12   5    0.00    0.76
  -4  12  -5    0.93    0.80
   5 -12   4    3.40    1.00
  -5  12  -4    3.66    0.91
   6 -12   3    1.15    0.98
  -6  12  -3    0.80    0.81
   7 -12   2   -0.13    0.98
  -7  12  -2    1.23    0.82
   8 -12   1   -0.40    1.00
  -8  12  -1   -0.46    0.74
   9 -12   0   -0.15    1.02
  -9  12   0    0.58    0.79
  10 -12  -1    0.56    1.11
 -10  12   1   -1.60    0.71
  11 -12  -2    0.36    1.10
  12 -12  -3    0.63    1.24
  13 -12  -4    2.07    1.36
 -10 -11  18    0.78    1.46
  10  11 -18    1.30    1.22
  -9 -11  17    0.48    1.17
   9  11 -17    0.08    1.09
  -8 -11  16    1.89    1.26
   8  11 -16    1.24    1.08
  -7 -11  15    0.73    1.13
   7  11 -15    0.17    0.96
  -6 -11  14    1.13    1.03
   6  11 -14    1.64    1.00
  -5 -11  13   -0.27    0.94
   5  11 -13   -0.99    0.91
  -4 -11  12   -0.31    0.63
  -4 -11  12    0.71    0.91
   4  11 -12   -0.17    0.94
  -3 -11  11    0.78    0.67
  -3 -11  11    1.55    0.86
   3  11 -11    1.26    0.97
  -2 -11  10    4.97    0.79
  -2 -11  10    5.77    1.00
   2  11 -10    4.73    1.00
  -1 -11   9    2.98    0.77
  -1 -11   9    3.62    0.88
   1  11  -9    5.18    0.95
   0 -11   8    7.17    0.92
   0 -11   8    5.22    0.83
   0  11  -8    5.99    0.99
   1 -11   7    5.35    0.83
  -1  11  -7    3.55    0.88
   2 -11   6    9.99    0.97
  -2  11  -6    7.55    1.01
   3 -11   5   10.27    1.08
  -3  11  -5    9.83    1.06
   4 -11   4    2.82    0.87
  -4  11  -4    3.48    0.82
   5 -11   3    0.93    0.80
  -5  11  -3    0.07    0.64
   6 -11   2    4.24    1.04
  -6  11  -2    5.29    0.85
   7 -11   1   -0.09    0.93
  -7  11  -1   -0.21    0.72
   8 -11   0    0.14    0.90
  -8  11   0   -0.21    0.71
   9 -11  -1    1.18    1.05
  -9  11   1    0.45    0.72
  10 -11  -2    1.04    1.06
 -10  11   2    1.49    0.82
  11 -11  -3   -0.42    1.07
  12 -11  -4    3.16    1.28
  13 -11  -5    0.19    1.24
 -13  11   5    0.33    1.03
 -10 -10  17   -1.53    1.30
  10  10 -17    0.40    1.15
  -9 -10  16    0.57    1.23
   9  10 -16    0.67    1.04
  -8 -10  15    0.74    1.14
   8  10 -15    1.74    1.04
  -7 -10  14    3.06    1.16
   7  10 -14    4.47    1.08
  -6 -10  13    2.10    1.02
   6  10 -13    1.59    0.97
  -5 -10  12    0.66    0.87
   5  10 -12   -0.06    0.88
  -4 -10  11   -0.54    0.78
  -4 -10  11    0.52    0.62
   4  10 -11   -0.65    0.91
  -3 -10  10    1.19    0.85
  -3 -10  10    0.55    0.61
   3  10 -10    1.66    0.88
  -2 -10   9    0.01    0.60
  -2 -10   9    1.12    0.80
   2  10  -9    1.70    0.83
  -1 -10   8    4.70    0.84
  -1 -10   8    3.09    0.68
   1  10  -8    2.89    0.77
   0 -10   7   -0.25    0.60
   0 -10   7    0.36    0.67
   0  10  -7   -0.11    0.70
   1 -10   6    2.05    0.66
  -1  10  -6    1.73    0.74
   2 -10   5   -0.19    0.62
  -2  10  -5    0.17    0.68
   3 -10   4   32.36    1.69
  -3  10  -4   30.61    1.69
   4 -10   3    0.01    0.72
  -4  10  -3    0.34    0.66
   5 -10   2   10.42    1.15
  -5  10  -2   11.27    0.99
   6 -10   1    0.04    0.77
  -6  10  -1    0.96    0.72
   7 -10   0    0.86    0.95
  -7  10   0    1.01    0.75
   8 -10  -1    0.01    0.96
  -8  10   1   -1.26    0.66
   9 -10  -2    1.06    1.02
  -9  10   2    0.31    0.72
  10 -10  -3   -0.48    0.97
 -10  10   3   -0.23    0.66
  11 -10  -4    1.72    1.13
  12 -10  -5    0.54    1.12
  13 -10  -6   -0.27    1.20
 -13  10   6    0.24    1.07
  14 -10  -7   -0.51    1.31
 -14  10   7   -0.19    1.11
 -11  -9  17   -0.46    1.35
  11   9 -17   -0.96    1.10
 -10  -9  16    2.11    1.40
  10   9 -16    0.33    1.08
  -9  -9  15    2.02    1.28
   9   9 -15    0.87    1.02
  -8  -9  14    0.94    1.14
   8   9 -14    0.57    0.97
  -7  -9  13    2.49    1.12
   7   9 -13    0.70    0.92
  -6  -9  12    1.19    1.01
   6   9 -12    1.42    0.93
  -5  -9  11   10.78    0.91
  -5  -9  11   12.20    1.33
   5   9 -11   11.45    1.20
  -4  -9  10    1.20    0.58
  -4  -9  10    0.21    0.84
   4   9 -10    0.16    0.83
  -3  -9   9    3.04    0.64
  -3  -9   9    2.05    0.81
   3   9  -9    3.02    0.86
  -2  -9   8    0.74    0.70
  -2  -9   8    1.17    0.53
   2   9  -8    1.77    0.71
  -1  -9   7    3.22    0.71
  -1  -9   7    4.77    0.67
   1   9  -7    3.74    0.73
   0  -9   6   28.42    1.46
   0  -9   6   26.44    1.39
   0   9  -6   28.19    1.54
   1  -9   5    1.96    0.61
  -1   9  -5    1.94    0.67
   2  -9   4    0.98    0.57
  -2   9  -4    0.32    0.62
   3  -9   3    1.05    0.65
  -3   9  -3   -0.58    0.55
   4  -9   2    1.45    0.74
  -4   9  -2    1.57    0.59
   5  -9   1    0.27    0.72
  -5   9  -1    0.47    0.61
   6  -9   0   -0.21    0.74
  -6   9   0    0.64    0.67
   7  -9  -1   -0.64    0.86
  -7   9   1    1.27    0.72
   8  -9  -2    4.66    1.10
  -8   9   2    5.34    0.89
   9  -9  -3   -0.97    0.88
  -9   9   3   -0.11    0.63
  10  -9  -4    0.60    0.97
 -10   9   4    0.47    0.66
  11  -9  -5    1.63    1.09
  12  -9  -6    0.77    1.15
  13  -9  -7   -1.28    1.16
 -13   9   7   -0.21    1.04
  14  -9  -8   -0.81    1.37
 -14   9   8    0.72    1.17
 -11  -8  16   -0.59    1.34
  11   8 -16   -1.18    1.01
 -10  -8  15    0.64    1.32
  10   8 -15    0.28    1.05
  -9  -8  14   -0.39    1.17
   9   8 -14    0.49    0.94
  -8  -8  13    0.43    1.08
   8   8 -13   -0.14    0.86
  -7  -8  12   -0.71    0.96
   7   8 -12   -1.63    0.81
  -6  -8  11    8.63    1.21
   6   8 -11    8.04    1.09
  -5  -8  10    0.69    0.50
  -5  -8  10   -0.25    0.77
   5   8 -10    0.55    0.80
  -4  -8   9    1.61    0.52
  -4  -8   9    1.95    0.84
   4   8  -9    1.20    0.75
  -3  -8   8   10.58    1.03
  -3  -8   8   10.36    0.82
   3   8  -8   11.17    0.97
  -2  -8   7    2.02    0.65
  -2  -8   7    0.94    0.49
   2   8  -7    0.74    0.62
  -1  -8   6    0.43    0.46
  -1  -8   6    0.52    0.58
   1   8  -6   -0.39    0.56
   0  -8   5    3.64    0.60
   0  -8   5    3.87    0.64
   0   8  -5    3.14    0.66
   1  -8   4    1.05    0.49
  -1   8  -4   -0.10    0.54
   2  -8   3    8.18    0.79
  -2   8  -3    9.36    0.83
   3  -8   2   11.91    0.95
  -3   8  -2   12.37    0.95
   4  -8   1    8.45    0.87
  -4   8  -1    8.36    0.82
   5  -8   0    9.23    1.01
  -5   8   0   10.10    0.92
   6  -8  -1    6.24    0.96
  -6   8   1    6.76    0.85
   7  -8  -2   13.67    1.31
  -7   8   2   15.22    1.17
   8  -8  -3    4.79    1.03
  -8   8   3    6.18    0.92
   9  -8  -4    0.16    0.93
  -9   8   4    0.20    0.64
  10  -8  -5   -0.65    0.93
 -10   8   5   -0.25    0.66
  11  -8  -6    1.43    1.10
  12  -8  -7    0.43    1.14
  13  -8  -8    1.15    1.24
 -13   8   8   -0.24    1.04
  14  -8  -9    2.80    1.44
 -14   8   9   -0.89    1.13
 -12  -7  16   -1.68    1.40
  12   7 -16   -0.25    1.03
 -11  -7  15    1.52    1.39
  11   7 -15    0.93    1.07
 -10  -7  14    1.22    1.14
  10   7 -14    1.20    0.98
  -9  -7  13   -1.29    0.95
   9   7 -13   -0.71    0.88
  -8  -7  12   -0.34    1.02
   8   7 -12   -0.49    0.81
  -7  -7  11   13.05    1.42
   7   7 -11   12.60    1.18
  -6  -7  10    1.20    0.96
  -6  -7  10    0.59    0.38
   6   7 -10    1.33    0.83
  -5  -7   9    0.70    0.88
  -5  -7   9    0.06    0.13
   5   7  -9    2.04    0.76
  -4  -7   8   -0.43    0.63
  -4  -7   8    0.52    0.43
   4   7  -8   -0.41    0.62
  -3  -7   7    0.04    0.41
  -3  -7   7    0.13    0.64
   3   7  -7   -0.61    0.56
  -2  -7   6    0.12    0.58
  -2  -7   6    0.53    0.43
   2   7  -6    0.40    0.54
  -1  -7   5   45.22    1.83
  -1  -7   5   45.22    1.99
   1   7  -5   45.96    1.90
   0  -7   4   17.13    0.97
   0  -7   4   16.32    1.06
   0   7  -4   15.60    1.05
   1  -7   3   20.07    1.12
  -1   7  -3   20.00    1.20
   2  -7   2    4.84    0.66
  -2   7  -2    3.65    0.55
   3  -7   1    2.23    0.59
  -3   7  -1    2.26    0.55
   4  -7   0    7.45    0.81
  -4   7   0    8.01    0.77
   5  -7  -1    6.39    0.86
  -5   7   1    6.43    0.77
   6  -7  -2    2.40    0.74
  -6   7   2    2.24    0.65
   7  -7  -3   -0.01    0.78
  -7   7   3    0.72    0.68
   8  -7  -4    9.42    1.21
  -8   7   4   11.36    1.04
   9  -7  -5   -0.13    0.93
  -9   7   5   -0.72    0.64
  10  -7  -6    1.19    1.03
 -10   7   6   -0.34    0.65
  11  -7  -7    0.56    1.05
  12  -7  -8    0.59    1.20
 -12   7   8    1.79    1.05
  13  -7  -9    0.85    1.24
 -13   7   9    0.35    1.12
  14  -7 -10    0.79    1.31
 -14   7  10   -1.05    1.15
 -12  -6  15   -2.59    1.25
  12   6 -15   -0.05    1.04
 -11  -6  14    0.45    1.16
  11   6 -14    0.94    1.06
 -10  -6  13    0.05    1.18
  10   6 -13    0.54    0.98
  -9  -6  12   -0.55    0.98
   9   6 -12   -0.61    0.87
  -8  -6  11    0.81    1.05
   8   6 -11    0.92    0.83
  -7  -6  10    1.80    0.95
   7   6 -10    1.84    0.82
  -6  -6   9   11.23    1.32
  -6  -6   9   12.85    0.77
   6   6  -9   11.04    1.04
  -5  -6   8    0.82    0.24
  -5  -6   8   -0.22    0.78
   5   6  -8   -0.12    0.51
   5   6  -8    0.46    0.66
   5   6  -8    1.20    0.57
  -4  -6   7    0.64    0.68
  -4  -6   7    0.16    0.12
   4   6  -7    0.63    0.56
   4   6  -7    0.22    0.44
  -3  -6   6   -0.28    0.58
  -3  -6   6   -0.01    0.37
   3   6  -6    0.12    0.50
   3   6  -6   -0.46    0.39
  -2  -6   5   -0.25    0.37
  -2  -6   5   -0.36    0.46
   2   6  -5    0.05    0.45
   2   6  -5   -0.48    0.39
  -1  -6   4    4.54    0.52
  -1  -6   4    3.25    0.62
   1   6  -4    4.02    0.59
   1   6  -4    4.59    0.55
   0  -6   3   66.09    2.51
   0   6  -3   66.79    2.54
   1  -6   2    5.94    0.64
  -1   6  -2    5.02    0.58
   2  -6   1    4.07    0.61
  -2   6  -1    4.35    0.59
   3  -6   0    1.75    0.55
  -3   6   0    1.54    0.51
   4  -6  -1    6.01    0.76
  -4   6   1    5.15    0.62
   5  -6  -2   11.14    1.01
  -5   6   2   12.68    1.01
   6  -6  -3   10.45    1.04
  -6   6   3   11.78    0.97
   7  -6  -4    0.47    0.81
  -7   6   4    1.44    0.62
   8  -6  -5   13.49    1.31
  -8   6   5   13.95    1.10
   9  -6  -6    1.28    0.95
  -9   6   6    0.63    0.62
  10  -6  -7    1.85    1.04
  11  -6  -8   -0.41    0.98
  12  -6  -9    0.87    1.10
 -12   6   9    1.37    1.08
  13  -6 -10   -1.73    1.11
 -13   6  10    0.34    1.12
 -14   6  11    2.50    1.30
 -12  -5  14    0.61    1.35
  12   5 -14    2.87    1.09
 -11  -5  13    1.17    1.26
  11   5 -13   -0.21    0.99
 -10  -5  12   -0.43    1.13
  10   5 -12    0.87    0.92
  -9  -5  11    1.63    1.10
   9   5 -11    1.08    0.83
  -8  -5  10    8.00    1.31
   8   5 -10    5.81    1.01
  -7  -5   9    1.57    0.90
   7   5  -9    1.13    0.79
  -6  -5   8    2.78    0.41
  -6  -5   8    1.79    0.91
   6   5  -8    2.43    0.74
   6   5  -8    3.40    0.63
  -5  -5   7   14.58    1.28
  -5  -5   7   17.77    0.83
   5   5  -7   16.46    1.08
   5   5  -7   17.49    1.02
   5   5  -7   17.77    1.04
  -4  -5   6   53.23    2.13
  -4  -5   6   60.58    2.61
   4   5  -6   63.25    2.27
   4   5  -6   60.63    2.29
  -3  -5   5   18.52    1.23
   3   5  -5   17.31    0.93
   3   5  -5   18.71    0.96
  -2  -5   4    0.46    0.54
  -2  -5   4   -0.08    0.31
   2   5  -4   -0.15    0.38
   2   5  -4    0.56    0.44
  -1  -5   3    4.09    0.45
  -1  -5   3    4.26    0.62
   1   5  -3    3.50    0.49
   1   5  -3    4.31    0.49
   0  -5   2    9.54    0.69
   0   5  -2    9.98    0.78
   0   5  -2    9.17    0.71
   1  -5   1    0.81    0.47
  -1   5  -1    0.98    0.43
   2  -5   0   69.48    2.63
  -2   5   0   67.76    2.59
   3  -5  -1   40.26    1.74
  -3   5   1   40.93    1.74
   4  -5  -2    0.45    0.57
  -4   5   2    0.72    0.48
   5  -5  -3    9.96    0.87
  -5   5   3   11.46    0.95
   6  -5  -4    3.14    0.78
  -6   5   4    2.60    0.61
   7  -5  -5   17.20    1.38
  -7   5   5   17.28    1.16
   8  -5  -6   -0.29    0.83
  -8   5   6   -0.06    0.59
   9  -5  -7    2.19    0.98
  -9   5   7    3.37    0.74
  10  -5  -8   -1.26    0.90
  11  -5  -9    0.09    1.00
 -11   5   9    0.94    0.99
  12  -5 -10    1.66    1.21
 -12   5  10    2.68    1.15
  13  -5 -11    0.14    1.16
 -13   5  11   -0.73    1.11
 -13  -4  14   -0.61    1.39
  13   4 -14   -0.83    1.12
 -12  -4  13    0.64    1.27
  12   4 -13   -0.20    0.98
 -11  -4  12    3.36    1.32
  11   4 -12    2.47    1.00
 -10  -4  11    1.71    1.18
  10   4 -11    3.05    0.98
  -9  -4  10    1.41    0.93
   9   4 -10    0.59    0.83
  -8  -4   9    4.76    1.07
   8   4  -9    4.83    0.92
  -7  -4   8    2.99    0.91
   7   4  -8    3.72    0.81
   7   4  -8    4.72    0.68
  -6  -4   7   24.46    1.59
  -6  -4   7   24.63    1.02
   6   4  -7   25.29    1.28
   6   4  -7   24.44    1.31
  -5  -4   6    7.85    0.50
  -5  -4   6    6.25    0.86
   5   4  -6    8.07    0.64
   5   4  -6    6.34    0.67
  -4  -4   5   28.17    1.10
  -4  -4   5   29.32    1.58
   4   4  -5   29.19    1.23
   4   4  -5   28.28    1.26
  -3  -4   4   11.27    0.56
  -3  -4   4   10.96    0.93
   3   4  -4   11.45    0.67
   3   4  -4   12.65    0.76
  -2  -4   3   17.34    1.14
   2   4  -3   19.48    0.84
   2   4  -3   17.07    0.87
  -1  -4   2   48.69    1.97
  -1  -4   2   49.63    1.79
   1   4  -2   47.94    1.83
   1   4  -2   49.02    1.81
   0  -4   1  561.92   18.77
   0   4  -1  547.71   18.77
   0   4  -1  550.94   18.78
   1  -4   0  116.82    4.07
  -1   4   0  113.54    4.06
   2  -4  -1   23.30    1.19
  -2   4   1   24.99    1.17
   3  -4  -2   25.98    1.29
  -3   4   2   24.41    1.24
   4  -4  -3    2.58    0.62
  -4   4   3    2.63    0.53
   5  -4  -4   -0.10    0.60
  -5   4   4    1.11    0.50
   6  -4  -5   28.77    1.53
  -6   4   5   30.52    1.47
   7  -4  -6    4.44    0.91
  -7   4   6    5.17    0.73
   8  -4  -7    1.48    0.90
  -8   4   7    1.43    0.62
   9  -4  -8    0.51    0.91
  -9   4   8    0.22    0.63
  10  -4  -9    0.37    0.96
  11  -4 -10   -0.15    1.01
 -11   4  10   -1.84    0.94
  12  -4 -11   -0.44    1.14
 -12   4  11   -1.74    1.03
  13  -4 -12    0.35    1.21
 -13   4  12   -0.67    1.17
 -13  -3  13    0.72    1.36
  13   3 -13    2.78    1.13
 -12  -3  12    1.22    1.27
  12   3 -12    0.40    0.96
 -11  -3  11    0.58    1.16
  11   3 -11    0.07    0.89
 -10  -3  10   -0.56    0.91
  10   3 -10    0.64    0.82
  -9  -3   9   11.86    1.40
   9   3  -9    8.26    1.02
  -8  -3   8    1.80    1.00
   8   3  -8    0.91    0.73
  -7  -3   7    2.73    0.86
   7   3  -7    0.83    0.53
   7   3  -7    2.33    0.71
  -6  -3   6    6.75    0.90
   6   3  -6    7.06    0.62
   6   3  -6    6.83    0.71
  -5  -3   5   55.10    2.44
   5   3  -5   57.68    2.16
   5   3  -5   56.01    2.14
  -4  -3   4    0.45    0.56
   4   3  -4   -0.25    0.31
   4   3  -4    0.84    0.33
   4   3  -4    0.37    0.37
  -3  -3   3   29.85    1.46
   3   3  -3   27.66    1.10
   3   3  -3   27.11    1.12
  -2  -3   2  103.48    3.93
   2   3  -2  105.94    3.88
   2   3  -2  106.00    3.67
   2   3  -2  109.64    3.67
  -1  -3   1    2.65    0.27
  -1  -3   1    2.18    0.41
  -1  -3   1    3.87    0.36
   1   3  -1    2.54    0.27
   1   3  -1    2.89    0.29
   0  -3   0    0.47    0.26
   0   3   0    0.15    0.24
   0   3   0    0.19    0.23
   1  -3  -1  184.13    6.36
  -1   3   1  186.08    6.37
  -1   3   1  182.59    6.35
   2  -3  -2   31.47    1.36
  -2   3   2   29.18    1.27
   3  -3  -3   27.79    1.39
  -3   3   3   30.32    1.33
   4  -3  -4   -0.14    0.53
  -4   3   4    0.21    0.43
   5  -3  -5   -0.10    0.53
  -5   3   5    0.10    0.48
   6  -3  -6    0.75    0.69
  -6   3   6    0.91    0.53
   7  -3  -7    0.34    0.79
  -7   3   7    0.63    0.57
   8  -3  -8   -0.60    0.88
  -8   3   8    0.22    0.55
   9  -3  -9    9.03    1.21
  -9   3   9    8.77    0.94
  10  -3 -10    0.29    0.98
 -10   3  10    0.68    0.96
  11  -3 -11   -0.32    1.03
 -11   3  11   -0.10    1.01
  12  -3 -12   -0.27    1.08
 -12   3  12   -1.90    1.02
  13  -3 -13    0.24    1.33
 -13   3  13   -0.12    1.19
 -13  -2  12    1.93    1.31
  13   2 -12    0.37    1.08
 -12  -2  11    1.02    1.09
  12   2 -11   -1.03    0.95
 -11  -2  10    1.45    1.11
  11   2 -10   -0.23    0.90
 -10  -2   9    0.43    0.93
  10   2  -9    1.00    0.85
  -9  -2   8    0.53    0.88
   9   2  -8   -0.23    0.78
  -8  -2   7    1.15    0.83
   8   2  -7   -0.26    0.70
  -7  -2   6    9.17    1.14
   7   2  -6    9.65    0.77
   7   2  -6    9.29    0.83
  -6  -2   5   66.15    2.87
   6   2  -5   64.43    2.44
   6   2  -5   64.06    2.48
  -5  -2   4    9.57    0.91
   5   2  -4    9.06    0.64
   5   2  -4   10.43    0.72
  -4  -2   3   30.26    1.55
   4   2  -3   31.48    1.23
   4   2  -3   32.25    1.25
  -3  -2   2    2.43    0.57
   3   2  -2    3.18    0.29
   3   2  -2    3.60    0.28
  -2  -2   1  432.24   15.15
  -1  -2   0    3.77    0.35
  -1  -2   0    2.15    0.29
   1   2   0    2.13    0.31
   0  -2  -1   48.02    1.82
   0  -2  -1   54.30    1.83
   1  -2  -2    1.85    0.38
  -1   2   2    1.85    0.32
  -1   2   2    2.17    0.35
   2  -2  -3   64.34    2.42
  -2   2   3   62.97    2.38
   3  -2  -4    2.78    0.61
  -3   2   4    2.71    0.50
   4  -2  -5   11.47    0.95
  -4   2   5   11.07    0.82
   5  -2  -6    0.58    0.59
  -5   2   6   -0.67    0.43
   6  -2  -7    2.29    0.73
  -6   2   7    1.40    0.53
   7  -2  -8    0.60    0.81
  -7   2   8   -0.04    0.56
   8  -2  -9    4.29    1.06
  -8   2   9    2.64    0.67
   9  -2 -10   12.68    1.41
  -9   2  10   13.05    1.08
  10  -2 -11    0.72    1.07
 -10   2  11    0.28    0.98
  11  -2 -12   -1.25    1.00
 -11   2  12    0.41    1.07
  12  -2 -13    1.48    1.21
 -12   2  13    0.62    1.16
  13  -2 -14   -0.47    1.33
 -13   2  14    0.77    1.25
 -14  -1  12   -0.79    1.29
  14   1 -12    0.49    1.14
 -13  -1  11    0.62    1.24
  13   1 -11    1.05    1.04
 -12  -1  10    4.94    1.30
  12   1 -10    4.91    1.10
 -11  -1   9    1.08    1.10
  11   1  -9    0.33    0.92
 -10  -1   8   -0.73    0.86
  10   1  -8    1.07    0.79
  -9  -1   7    3.19    0.96
   9   1  -7    2.85    0.85
  -8  -1   6   20.29    1.65
   8   1  -6   18.33    1.16
   8   1  -6   17.47    1.21
  -7  -1   5   13.21    1.16
   7   1  -5   13.79    0.94
   7   1  -5   15.47    1.04
  -6  -1   4    1.20    0.65
   6   1  -4    1.60    0.48
   6   1  -4    0.66    0.39
  -5  -1   3   19.84    1.19
   5   1  -3   20.13    0.95
   5   1  -3   19.45    0.91
  -4  -1   2   11.97    0.96
   4   1  -2   12.52    0.63
   4   1  -2   12.86    0.65
  -3  -1   1    3.62    0.56
   3   1  -1    4.03    0.29
   3   1  -1    3.90    0.29
  -2  -1   0  134.42    4.83
  -1  -1  -1  151.88    5.16
   0  -1  -2   18.75    0.85
   0  -1  -2   24.95    0.88
   1  -1  -3   16.29    0.78
  -1   1   3   15.24    0.77
   2  -1  -4   11.50    0.87
  -2   1   4   12.57    0.74
   3  -1  -5    9.70    0.81
  -3   1   5    9.02    0.75
   4  -1  -6   38.23    1.75
  -4   1   6   39.24    1.66
   5  -1  -7   13.75    1.11
  -5   1   7   14.26    0.94
   6  -1  -8    2.85    0.79
  -6   1   8    2.50    0.59
   7  -1  -9    1.99    0.90
  -7   1   9    1.52    0.62
   8  -1 -10    1.43    0.94
  -8   1  10    0.01    0.59
   9  -1 -11    0.34    0.96
  -9   1  11    0.10    0.91
  10  -1 -12    0.83    1.01
 -10   1  12    0.34    1.01
  11  -1 -13   -1.75    1.03
 -11   1  13    1.59    1.02
  12  -1 -14   -1.32    1.19
 -12   1  14    2.12    1.25
  13  -1 -15   -0.23    1.40
 -13   1  15   -0.14    1.23
 -14   0  11    0.11    1.34
  14   0 -11    1.15    1.16
 -13   0  10   -0.31    1.11
  13   0 -10    1.17    1.03
 -12   0   9    3.81    1.27
  12   0  -9    4.00    1.05
 -11   0   8   -0.26    1.02
  11   0  -8   -0.86    0.80
 -10   0   7    0.21    0.90
  10   0  -7    0.46    0.74
  -9   0   6   -0.31    0.80
   9   0  -6    1.43    0.80
  -8   0   5    1.02    0.82
   8   0  -5    0.59    0.51
   8   0  -5    1.17    0.68
  -7   0   4    0.52    0.31
  -7   0   4   -0.03    0.70
   7   0  -4    1.08    0.56
   7   0  -4    0.93    0.48
  -6   0   3    0.62    0.27
  -6   0   3    0.75    0.60
   6   0  -3   -0.22    0.36
   6   0  -3    0.69    0.45
  -5   0   2    1.94    0.52
  -5   0   2    2.56    0.25
   5   0  -2    2.93    0.38
   5   0  -2    2.26    0.41
  -4   0   1    0.88    0.49
   4   0  -1    0.80    0.28
   4   0  -1    0.94    0.33
  -3   0   0   30.16    1.36
   3   0   0   29.70    1.13
   3   0   0   30.47    1.12
  -2   0  -1  198.54    7.05
   2   0   1  201.90    6.79
   2   0   1  199.48    6.79
  -1   0  -2   35.43    1.20
  -1   0  -2   32.14    1.21
   1   0   2   29.35    1.38
   0   0  -3    0.88    0.32
   0   0  -3    0.42    0.34
   0   0   3    0.70    0.38
   0   0   3    1.07    0.25
   0   0   3    0.60    0.20
   1   0  -4    0.77    0.39
  -1   0   4    1.35    0.36
   2   0  -5    4.93    0.64
  -2   0   5    4.63    0.53
   3   0  -6   68.70    2.68
  -3   0   6   68.98    2.62
   4   0  -7   27.23    1.43
  -4   0   7   27.03    1.32
   5   0  -8   11.09    0.99
  -5   0   8   10.31    0.86
   6   0  -9    0.10    0.78
  -6   0   9    1.13    0.57
   7   0 -10    2.49    0.96
  -7   0  10    2.84    0.69
   8   0 -11    2.23    0.99
  -8   0  11    0.76    0.93
  -8   0  11    2.22    0.70
  -8   0  11    3.57    0.73
   9   0 -12    5.97    1.18
  -9   0  12    6.65    1.23
  10   0 -13   -0.29    1.07
 -10   0  13   -0.10    1.02
  11   0 -14   -0.77    1.19
 -11   0  14    0.87    1.14
  12   0 -15    1.12    1.21
 -12   0  15   -0.50    1.15
 -13   0  16    0.51    1.27
 -14   1  10    0.01    1.25
  14  -1 -10    1.55    1.16
 -13   1   9    0.73    1.14
  13  -1  -9    1.45    1.04
 -12   1   8   -0.80    1.04
  12  -1  -8   -0.58    0.94
 -11   1   7    1.03    0.99
  11  -1  -7    0.49    0.84
 -10   1   6    1.17    0.94
  10  -1  -6   -0.98    0.75
  -9   1   5    8.66    1.16
   9  -1  -5    9.95    1.01
  -8   1   4    5.36    0.48
  -8   1   4    3.42    0.88
   8  -1  -4    3.22    0.76
   8  -1  -4    3.72    0.66
  -7   1   3   -0.29    0.63
  -7   1   3   -0.79    0.30
   7  -1  -3    0.18    0.52
   7  -1  -3    0.42    0.46
  -6   1   2    3.30    0.65
  -6   1   2    3.56    0.36
   6  -1  -2    2.66    0.48
   6  -1  -2    3.36    0.55
  -5   1   1    0.61    0.25
  -5   1   1   -0.25    0.48
   5  -1  -1    0.05    0.34
   5  -1  -1    0.51    0.39
  -4   1   0    1.13    0.44
  -4   1   0    0.58    0.22
   4  -1   0    1.73    0.34
   4  -1   0    1.84    0.38
  -3   1  -1   47.36    1.87
   3  -1   1   47.02    1.74
   3  -1   1   46.74    1.74
  -2   1  -2   54.84    2.10
  -2   1  -2   61.28    2.17
   2  -1   2   58.94    2.12
   2  -1   2   60.04    2.11
  -1   1  -3    5.73    0.44
   1  -1   3    5.52    0.56
   1  -1   3    5.18    0.43
   1  -1   3    4.55    0.42
   0   1  -4    5.49    0.55
   0   1  -4    5.06    0.51
   0  -1   4    5.05    0.56
   0  -1   4    5.13    0.46
   0  -1   4    5.07    0.46
   1   1  -5   16.77    1.12
   1   1  -5   15.75    0.92
  -1  -1   5   15.82    0.90
   2   1  -6    1.65    0.61
  -2  -1   6    1.39    0.47
   3   1  -7   17.81    1.14
  -3  -1   7   18.94    1.05
   4   1  -8   25.36    1.38
  -4  -1   8   22.85    1.24
   5   1  -9    2.70    0.77
  -5  -1   9    2.49    0.59
   6   1 -10    0.71    0.85
  -6  -1  10    0.58    0.55
  -6  -1  10   -0.45    0.59
   7   1 -11    0.41    0.93
  -7  -1  11   -1.03    0.54
  -7  -1  11    0.37    0.89
  -7  -1  11   -0.12    0.60
   8   1 -12    0.02    1.04
  -8  -1  12    1.02    0.87
  -8  -1  12    0.23    0.64
  -8  -1  12    1.44    0.66
   9   1 -13    8.38    1.29
  -9  -1  13    7.26    1.21
  10   1 -14    0.73    1.08
 -10  -1  14    0.74    1.08
  11   1 -15   -0.25    1.21
 -11  -1  15    0.07    1.12
  12   1 -16    0.74    1.36
 -12  -1  16    0.84    1.24
 -14   2   9   -0.87    1.17
  14  -2  -9    0.02    1.12
 -13   2   8   -0.62    1.10
  13  -2  -8    0.42    1.00
 -12   2   7    5.25    1.22
  12  -2  -7    4.95    1.09
 -11   2   6    0.34    0.90
  11  -2  -6    0.35    0.83
 -10   2   5   -0.24    0.85
  10  -2  -5   -0.07    0.77
  -9   2   4    2.62    0.91
   9  -2  -4    0.99    0.75
  -8   2   3    3.37    0.45
  -8   2   3    3.16    0.83
   8  -2  -3    2.74    0.76
  -7   2   2   -0.14    0.19
  -7   2   2    0.38    0.60
   7  -2  -2    0.05    0.51
   7  -2  -2    0.14    0.55
  -6   2   1    3.14    0.62
   6  -2  -1    3.22    0.55
   6  -2  -1    2.92    0.49
  -5   2   0    0.68    0.46
  -5   2   0   -0.05    0.13
   5  -2   0   -0.44    0.34
   5  -2   0   -0.96    0.39
  -4   2  -1   52.78    2.06
  -4   2  -1   48.70    1.91
   4  -2   1   53.65    2.01
   4  -2   1   52.99    1.99
  -3   2  -2   41.49    1.64
  -3   2  -2   41.89    1.59
   3  -2   2   42.04    1.65
   3  -2   2   41.10    1.63
  -2   2  -3   30.45    1.17
  -2   2  -3   30.44    1.27
   2  -2   3   29.72    1.26
   2  -2   3   31.57    1.16
   2  -2   3   28.58    1.26
  -1   2  -4    0.63    0.44
   1  -2   4    0.26    0.37
   1  -2   4    0.25    0.43
   0   2  -5   13.43    0.97
   0   2  -5   12.21    0.89
   0  -2   5   12.27    0.80
   0  -2   5   13.52    0.97
   1   2  -6    3.12    0.60
   1   2  -6    3.48    0.57
  -1  -2   6    2.48    0.51
   2   2  -7    4.05    0.69
  -2  -2   7    5.25    0.62
  -2  -2   7    5.42    0.62
   3   2  -8   46.37    1.95
  -3  -2   8   44.14    1.90
  -3  -2   8   44.51    1.90
   4   2  -9    3.75    0.77
  -4  -2   9    2.60    0.60
  -4  -2   9    3.29    0.62
   5   2 -10    0.47    0.76
  -5  -2  10    1.20    0.58
  -5  -2  10    0.98    0.57
   6   2 -11    3.61    0.98
  -6  -2  11    4.76    0.75
  -6  -2  11    4.90    1.00
   7   2 -12    0.05    0.95
  -7  -2  12   -0.13    0.90
  -7  -2  12   -0.86    0.59
   8   2 -13    1.09    1.00
  -8  -2  13    0.28    0.89
  -8  -2  13    1.12    0.68
   9   2 -14    0.48    1.04
  -9  -2  14   -1.77    0.96
  10   2 -15    0.63    1.12
 -10  -2  15    0.53    1.00
  11   2 -16    2.02    1.30
 -11  -2  16    0.23    1.16
  12   2 -17   -0.76    1.25
 -12  -2  17   -0.16    1.26
 -14   3   8   -0.17    1.13
  14  -3  -8    2.55    1.15
 -13   3   7    0.02    1.06
  13  -3  -7    2.23    1.09
 -12   3   6    1.43    1.05
  12  -3  -6    2.04    0.99
 -11   3   5    0.60    0.96
  11  -3  -5    1.86    0.88
 -10   3   4    0.47    0.82
  10  -3  -4    0.02    0.79
  -9   3   3    0.79    0.77
   9  -3  -3    0.22    0.75
  -8   3   2    0.43    0.74
  -8   3   2    0.28    0.13
   8  -3  -2    1.03    0.71
  -7   3   1    8.38    0.85
  -7   3   1    6.08    0.52
   7  -3  -1    8.05    0.80
  -6   3   0    1.31    0.38
  -6   3   0    1.29    0.54
   6  -3   0   -0.34    0.46
   6  -3   0    0.95    0.53
  -5   3  -1    4.97    0.49
  -5   3  -1    3.81    0.53
   5  -3   1    3.87    0.57
   5  -3   1    5.82    0.57
  -4   3  -2    0.25    0.35
  -4   3  -2    0.14    0.35
   4  -3   2    0.27    0.45
   4  -3   2    0.90    0.44
  -3   3  -3   50.34    1.87
  -3   3  -3   48.86    1.93
   3  -3   3   49.96    1.98
   3  -3   3   49.61    2.00
  -2   3  -4    4.62    0.55
   2  -3   4    3.74    0.52
  -1   3  -5    2.28    0.57
   1  -3   5    2.54    0.51
   0   3  -6    0.27    0.58
   0  -3   6    0.51    0.58
   0  -3   6   -0.08    0.42
   1   3  -7    4.41    0.65
   1   3  -7    4.59    0.66
  -1  -3   7    4.64    0.57
   2   3  -8    2.00    0.57
   2   3  -8    0.57    0.61
  -2  -3   8    1.24    0.50
   3   3  -9    0.59    0.66
   3   3  -9    0.33    0.58
  -3  -3   9    1.07    0.53
   4   3 -10    5.30    0.86
  -4  -3  10    5.95    0.73
  -4  -3  10    4.78    0.81
   5   3 -11    5.39    1.00
  -5  -3  11    4.39    0.90
  -5  -3  11    3.99    0.74
   6   3 -12    1.72    0.96
  -6  -3  12    0.42    0.81
  -6  -3  12    1.07    0.66
   7   3 -13    0.66    0.99
  -7  -3  13    1.03    0.61
  -7  -3  13    0.48    0.87
   8   3 -14    1.36    1.06
  -8  -3  14   -0.44    0.97
   9   3 -15   -0.19    1.09
  -9  -3  15    0.55    1.07
  10   3 -16   -1.39    1.16
 -10  -3  16    0.14    1.09
  11   3 -17    1.45    1.27
 -11  -3  17    1.17    1.24
  12   3 -18    0.37    1.30
 -12  -3  18    0.55    1.31
 -14   4   7    1.57    1.19
  14  -4  -7    0.37    1.13
 -13   4   6    2.04    1.10
  13  -4  -6    1.58    1.05
 -12   4   5   -0.05    0.94
  12  -4  -5   -1.02    0.90
 -11   4   4    0.11    0.85
  11  -4  -4    0.10    0.85
 -10   4   3    0.31    0.82
  10  -4  -3   -0.16    0.80
  -9   4   2   -0.27    0.25
  -9   4   2    1.27    0.76
   9  -4  -2   -0.53    0.72
  -8   4   1    1.52    0.48
  -8   4   1    1.12    0.68
   8  -4  -1    1.37    0.70
  -7   4   0    6.59    0.61
  -7   4   0    3.81    0.71
   7  -4   0    4.75    0.77
  -6   4  -1   -0.64    0.45
  -6   4  -1    0.13    0.41
   6  -4   1    0.52    0.51
  -5   4  -2   14.09    0.91
  -5   4  -2   12.04    0.87
   5  -4   2   13.99    0.97
  -4   4  -3    4.74    0.53
  -4   4  -3    4.41    0.42
   4  -4   3    4.53    0.63
  -3   4  -4   36.18    1.35
  -3   4  -4   36.19    1.58
   3  -4   4   36.38    1.59
  -2   4  -5   15.01    1.04
   2  -4   5   15.92    0.98
  -1   4  -6    1.83    0.56
   1  -4   6    1.01    0.54
   1  -4   6    1.30    0.26
   0   4  -7   44.22    1.95
   0  -4   7   46.29    1.77
   0  -4   7   44.32    2.00
   0  -4   7   44.32    1.89
   1   4  -8    6.01    0.72
   1   4  -8    6.16    0.72
  -1  -4   8    5.11    0.68
  -1  -4   8    6.25    0.70
  -1  -4   8    6.33    0.60
   2   4  -9    0.41    0.65
   2   4  -9    0.63    0.58
  -2  -4   9    0.41    0.50
  -2  -4   9    0.18    0.51
   3   4 -10    1.10    0.72
   3   4 -10    0.43    0.58
  -3  -4  10    1.01    0.57
  -3  -4  10    0.44    0.59
   4   4 -11   11.45    0.97
   4   4 -11    9.68    1.10
  -4  -4  11   10.60    0.94
  -4  -4  11    9.03    0.97
   5   4 -12    2.48    0.97
  -5  -4  12    3.07    0.85
  -5  -4  12    4.65    0.80
   6   4 -13    1.79    0.98
  -6  -4  13   -0.93    0.88
  -6  -4  13   -0.06    0.67
   7   4 -14    1.65    1.07
  -7  -4  14    3.25    0.76
  -7  -4  14    2.06    1.01
   8   4 -15    2.09    1.08
  -8  -4  15    2.06    1.08
   9   4 -16    0.01    1.16
  -9  -4  16    1.88    1.11
  10   4 -17   -0.85    1.12
 -10  -4  17   -0.85    1.02
  11   4 -18    1.10    1.27
 -11  -4  18   -1.42    1.07
 -14   5   6   -0.87    1.14
  14  -5  -6    1.06    1.15
 -13   5   5   -0.59    1.01
  13  -5  -5    0.77    1.03
 -12   5   4    0.66    0.92
  12  -5  -4    0.15    0.93
 -11   5   3    0.77    0.84
  11  -5  -3    1.19    0.90
 -10   5   2    0.22    0.73
  10  -5  -2    0.39    0.83
  -9   5   1   -0.83    0.68
  -9   5   1    0.23    0.47
   9  -5  -1   -0.83    0.78
  -8   5   0    7.29    0.88
  -8   5   0    7.41    0.71
   8  -5   0    6.77    0.97
  -7   5  -1    1.49    0.60
  -7   5  -1    3.92    0.58
   7  -5   1    2.87    0.72
  -6   5  -2   14.58    0.99
  -6   5  -2   13.58    0.95
   6  -5   2   12.92    1.03
  -5   5  -3    4.41    0.58
  -5   5  -3    3.83    0.47
   5  -5   3    5.31    0.69
  -4   5  -4   10.80    0.85
  -4   5  -4    9.88    0.59
   4  -5   4   11.01    0.93
  -3   5  -5   12.59    0.96
   3  -5   5   11.67    0.91
  -2   5  -6   24.40    1.35
   2  -5   6   26.41    1.28
  -1   5  -7    9.40    0.85
   1  -5   7    9.44    0.81
   1  -5   7    9.20    0.56
   0   5  -8    0.29    0.56
   0  -5   8    0.70    0.59
   0  -5   8    0.37    0.35
   0  -5   8    0.59    0.54
   1   5  -9    1.89    0.71
  -1  -5   9    3.84    0.65
  -1  -5   9    2.61    0.58
  -1  -5   9    3.32    0.53
   2   5 -10    2.04    0.75
   2   5 -10    1.07    0.61
  -2  -5  10    1.93    0.58
  -2  -5  10    1.56    0.54
   3   5 -11    1.08    0.79
   3   5 -11   -1.36    0.60
  -3  -5  11    0.40    0.63
  -3  -5  11    0.04    0.57
   4   5 -12    0.70    0.85
   4   5 -12   -0.02    0.68
  -4  -5  12    0.94    0.76
  -4  -5  12    1.20    0.65
   5   5 -13    0.40    0.94
   5   5 -13   -0.38    0.74
  -5  -5  13    0.40    0.76
  -5  -5  13    1.07    0.71
   6   5 -14   -0.80    0.79
   6   5 -14   -0.11    0.97
  -6  -5  14   -0.25    0.61
  -6  -5  14   -0.70    0.87
   7   5 -15    0.38    0.83
   7   5 -15   -0.54    0.97
  -7  -5  15    0.46    0.66
  -7  -5  15    0.15    0.93
   8   5 -16   -0.80    1.06
  -8  -5  16    0.78    1.02
   9   5 -17    2.28    1.28
  -9  -5  17   -1.56    1.00
  10   5 -18   -1.00    1.24
 -10  -5  18    1.64    1.24
  11   5 -19   -0.58    1.37
 -11  -5  19   -0.52    1.28
 -14   6   5   -0.24    1.09
  14  -6  -5   -1.00    1.12
 -13   6   4   -0.17    0.96
  13  -6  -4    0.55    1.08
 -12   6   3    1.01    0.92
  12  -6  -3    1.71    0.98
 -11   6   2    1.39    0.83
  11  -6  -2    1.67    0.90
 -10   6   1   -0.05    0.72
  10  -6  -1   -0.57    0.84
  -9   6   0   -0.62    0.49
  -9   6   0    1.31    0.72
   9  -6   0    0.19    0.85
  -8   6  -1    3.24    0.72
  -8   6  -1    4.70    0.65
   8  -6   1    3.75    0.85
  -7   6  -2    1.07    0.57
  -7   6  -2   -0.05    0.54
   7  -6   2   -0.45    0.63
  -6   6  -3    6.58    0.69
  -6   6  -3    3.90    0.56
   6  -6   3    3.33    0.74
  -5   6  -4   25.28    1.14
  -5   6  -4   25.60    1.31
   5  -6   4   25.69    1.41
  -4   6  -5   -0.23    0.22
  -4   6  -5   -0.30    0.55
   4  -6   5   -0.83    0.54
  -3   6  -6   31.12    1.57
   3  -6   6   30.46    1.54
  -2   6  -7   30.26    1.58
   2  -6   7   30.81    1.54
  -1   6  -8   33.63    1.70
   1  -6   8   33.90    1.35
   1  -6   8   32.69    1.58
   0   6  -9    0.88    0.66
   0  -6   9    3.38    0.68
   0  -6   9    1.17    0.42
   0  -6   9    0.22    0.58
   1   6 -10    0.78    0.73
  -1  -6  10    0.04    0.61
  -1  -6  10    0.03    0.46
  -1  -6  10    0.61    0.60
   2   6 -11    0.27    0.76
  -2  -6  11    0.69    0.57
  -2  -6  11    0.48    0.59
   3   6 -12    3.92    0.95
   3   6 -12    2.99    0.75
  -3  -6  12    2.35    0.73
  -3  -6  12    2.90    0.74
   4   6 -13    1.66    0.97
   4   6 -13    0.90    0.74
  -4  -6  13    0.77    0.72
  -4  -6  13    0.60    0.76
   5   6 -14    0.30    0.78
   5   6 -14    0.26    0.98
  -5  -6  14   -0.04    0.79
  -5  -6  14   -0.37    0.70
   6   6 -15    0.38    0.76
   6   6 -15   -0.52    0.94
  -6  -6  15    1.09    0.89
  -6  -6  15    0.71    0.66
   7   6 -16    0.81    1.03
  -7  -6  16    3.75    1.11
   8   6 -17    0.16    1.06
  -8  -6  17    0.30    0.94
   9   6 -18    1.47    1.20
  -9  -6  18    0.80    1.11
  10   6 -19   -0.50    1.27
 -10  -6  19    1.11    1.28
 -14   7   4   -1.49    0.98
  14  -7  -4   -0.73    1.07
 -13   7   3   -0.36    0.88
  13  -7  -3   -0.78    1.05
 -12   7   2   -0.38    0.82
  12  -7  -2    0.17    1.01
 -11   7   1    2.75    0.86
  11  -7  -1    2.57    1.01
 -10   7   0    2.23    0.73
  10  -7   0    1.84    0.94
  -9   7  -1    0.24    0.66
  -9   7  -1    1.20    0.61
   9  -7   1   -0.16    0.90
  -8   7  -2    0.08    0.58
  -8   7  -2    0.29    0.57
   8  -7   2   -0.67    0.76
  -7   7  -3    6.16    0.70
  -7   7  -3    6.97    0.77
   7  -7   3    5.29    0.92
  -6   7  -4   16.13    1.13
  -6   7  -4   14.08    0.90
   6  -7   4   13.97    1.18
  -5   7  -5    1.27    0.34
  -5   7  -5    1.88    0.59
   5  -7   5    1.45    0.61
  -4   7  -6   -0.20    0.59
   4  -7   6    1.06    0.66
  -3   7  -7   49.24    2.20
   3  -7   7   49.53    2.15
  -2   7  -8    1.23    0.68
   2  -7   8    0.73    0.58
  -1   7  -9    2.72    0.78
   1  -7   9    2.48    0.69
   1  -7   9    2.10    0.41
   0   7 -10    1.25    0.74
   0  -7  10    1.62    0.67
   0  -7  10    1.77    0.48
   0  -7  10    1.25    0.62
   1   7 -11    2.43    0.84
  -1  -7  11    1.84    0.68
  -1  -7  11    1.14    0.54
  -1  -7  11    1.01    0.68
   2   7 -12    0.61    0.80
  -2  -7  12    0.33    0.59
  -2  -7  12    0.65    0.68
   3   7 -13    0.66    0.93
  -3  -7  13    0.03    0.73
  -3  -7  13   -0.64    0.69
   4   7 -14    0.23    0.73
   4   7 -14   -1.01    0.96
  -4  -7  14   -0.23    0.77
  -4  -7  14   -0.37    0.72
   5   7 -15    5.85    0.90
   5   7 -15    5.30    1.20
  -5  -7  15    6.31    0.96
  -5  -7  15    6.22    1.05
   6   7 -16    0.46    1.03
  -6  -7  16    1.53    0.78
  -6  -7  16    2.08    0.95
   7   7 -17    1.49    1.14
  -7  -7  17   -0.89    0.93
   8   7 -18    1.25    1.22
  -8  -7  18    1.56    1.13
   9   7 -19   -0.45    1.24
  -9  -7  19    3.05    1.26
  10   7 -20    1.34    1.45
 -10  -7  20   -1.96    1.14
 -14   8   3    0.71    1.05
  14  -8  -3   -0.06    1.24
 -13   8   2   -2.14    0.86
  13  -8  -2    2.12    1.15
 -12   8   1    0.00    0.84
  12  -8  -1    1.81    1.12
 -11   8   0    0.44    0.73
  11  -8   0   -0.04    0.99
 -10   8  -1    1.56    0.69
  10  -8   1   -0.01    0.91
  -9   8  -2    1.08    0.66
  -9   8  -2    0.60    0.62
   9  -8   2    1.15    0.89
  -8   8  -3   10.90    0.94
  -8   8  -3    8.10    0.83
   8  -8   3    7.67    1.10
  -7   8  -4    2.50    0.55
  -7   8  -4    2.48    0.71
   7  -8   4    2.55    0.87
  -6   8  -5    2.51    0.72
  -6   8  -5    2.35    0.45
   6  -8   5    1.84    0.81
  -5   8  -6    5.10    0.38
  -5   8  -6    5.27    0.80
   5  -8   6    5.02    0.87
  -4   8  -7    0.76    0.69
   4  -8   7    0.98    0.71
   3  -8   8   17.90    1.31
  -2   8  -9   23.58    1.46
   2  -8   9   23.82    1.40
  -1   8 -10    0.79    0.80
   1  -8  10    0.45    0.72
   1  -8  10    0.13    0.67
   1  -8  10   -0.09    0.42
   0   8 -11    6.11    1.02
   0  -8  11    4.53    0.84
   0  -8  11    6.11    0.65
   0  -8  11    4.40    0.81
   1   8 -12    2.92    0.99
  -1  -8  12    2.32    0.78
  -1  -8  12    3.72    0.70
  -1  -8  12    1.27    0.76
   2   8 -13    0.40    0.85
  -2  -8  13    1.60    0.69
  -2  -8  13    0.20    0.74
   3   8 -14    3.49    1.08
  -3  -8  14    2.79    0.83
  -3  -8  14    3.54    0.88
   4   8 -15    5.53    1.22
  -4  -8  15    7.70    1.06
  -4  -8  15    8.44    1.01
   5   8 -16    1.37    1.05
  -5  -8  16    0.65    0.71
  -5  -8  16    0.96    0.88
   6   8 -17    0.29    1.05
  -6  -8  17   -0.17    0.91
   7   8 -18    0.64    1.18
  -7  -8  18    1.30    1.03
   8   8 -19    0.67    1.22
  -8  -8  19   -0.01    1.05
   9   8 -20    0.63    1.41
  -9  -8  20   -0.45    1.15
 -14   9   2    0.50    1.00
  14  -9  -2   -0.08    1.19
 -13   9   1    0.52    0.89
  13  -9  -1    0.74    1.13
 -12   9   0   -0.45    0.79
  12  -9   0   -0.50    0.99
 -11   9  -1    3.06    0.80
  11  -9   1    4.32    1.12
 -10   9  -2    0.68    0.66
  10  -9   2    0.81    1.01
  -9   9  -3    0.77    0.59
  -9   9  -3    0.62    0.65
   9  -9   3   -0.32    0.87
  -8   9  -4    0.71    0.54
  -8   9  -4    0.97    0.70
   8  -9   4   -0.16    0.85
  -7   9  -5    6.58    0.62
  -7   9  -5    5.75    0.85
   7  -9   5    5.80    1.01
  -6   9  -6    5.75    0.89
  -6   9  -6    6.12    0.51
   6  -9   6    6.64    1.04
  -5   9  -7    3.83    0.84
   5  -9   7    4.24    0.92
  -4   9  -8    3.75    0.82
   4  -9   8    4.96    0.91
  -3   9  -9    0.71    0.82
   3  -9   9   -0.11    0.73
  -2   9 -10    1.12    0.78
   2  -9  10   -0.26    0.73
  -1   9 -11   -1.05    0.83
   1  -9  11    0.15    0.77
   1  -9  11    1.30    0.77
   1  -9  11    0.23    0.47
   0   9 -12    0.54    0.85
   0  -9  12    0.29    0.55
   0  -9  12   -0.38    0.73
   0  -9  12    0.35    0.72
   1   9 -13   10.34    1.25
  -1  -9  13   10.00    0.93
  -1  -9  13    9.89    1.10
  -1  -9  13   11.64    1.04
   2   9 -14    0.71    1.01
  -2  -9  14    1.26    0.79
  -2  -9  14    0.97    0.73
   3   9 -15   -1.76    0.99
  -3  -9  15   -0.30    0.73
  -3  -9  15   -0.80    0.75
   4   9 -16    0.11    1.05
  -4  -9  16   -0.56    0.81
  -4  -9  16   -0.71    0.69
   5   9 -17    1.26    1.08
  -5  -9  17    2.20    0.81
  -5  -9  17    1.24    0.88
   6   9 -18    0.95    1.14
  -6  -9  18   -0.27    0.93
   7   9 -19    0.50    1.19
  -7  -9  19    0.03    1.02
   8   9 -20   -0.20    1.29
  -8  -9  20    1.23    1.17
   9   9 -21   -2.04    1.28
  -9  -9  21   -0.11    1.23
  14 -10  -1    0.95    1.21
 -13  10   0    0.67    0.84
  13 -10   0    0.42    1.24
 -12  10  -1    5.58    0.96
  12 -10   1    5.30    1.27
 -11  10  -2    0.27    0.69
  11 -10   2    0.77    1.07
 -10  10  -3   -0.33    0.60
  10 -10   3    1.11    0.99
  -9  10  -4    1.42    0.73
  -9  10  -4   -0.06    0.55
   9 -10   4    0.77    0.91
  -8  10  -5    0.47    0.71
  -8  10  -5   -0.07    0.49
   8 -10   5   -0.92    0.84
  -7  10  -6   -0.36    0.74
  -7  10  -6    0.30    0.42
   7 -10   6    0.34    0.90
  -6  10  -7    4.05    0.38
  -6  10  -7    1.18    0.79
   6 -10   7    2.87    0.96
  -5  10  -8    1.31    0.84
   5 -10   8   -0.62    0.80
  -4  10  -9    4.98    0.94
   4 -10   9    7.10    1.08
  -3  10 -10    0.99    0.92
   3 -10  10    1.47    0.78
  -2  10 -11    0.60    0.95
   2 -10  11    1.46    0.87
  -1  10 -12    7.02    1.14
   1 -10  12    7.15    0.70
   1 -10  12    7.76    1.05
   1 -10  12    5.37    1.00
   0  10 -13    4.84    1.15
   0 -10  13    5.92    0.75
   0 -10  13    5.18    0.92
   0 -10  13    4.32    0.92
   1  10 -14    2.40    1.04
  -1 -10  14    2.71    0.81
  -1 -10  14    2.29    0.82
  -1 -10  14    1.44    0.69
   2  10 -15    3.94    1.20
  -2 -10  15    2.09    0.89
  -2 -10  15    3.50    0.83
   3  10 -16    0.39    1.04
  -3 -10  16   -0.57    0.75
  -3 -10  16    0.18    0.76
   4  10 -17    0.80    1.10
  -4 -10  17   -0.88    0.84
  -4 -10  17    0.81    0.80
   5  10 -18   -0.72    1.08
  -5 -10  18    0.25    0.97
   6  10 -19    1.13    1.19
  -6 -10  19    1.31    1.03
   7  10 -20    0.75    1.27
  -7 -10  20    0.73    1.11
   8  10 -21    1.63    1.43
  -8 -10  21    0.16    1.11
  14 -11   0   -0.85    1.27
  13 -11   1    0.60    1.25
  12 -11   2    2.24    1.19
  11 -11   3    3.52    1.18
 -10  11  -4    4.13    0.69
  10 -11   4    2.82    1.17
  -9  11  -5    1.93    0.79
  -9  11  -5    1.85    0.53
   9 -11   5    1.17    1.00
  -8  11  -6    2.98    0.83
  -8  11  -6    4.37    0.54
   8 -11   6    3.35    1.04
  -7  11  -7    6.55    0.99
   7 -11   7    4.92    1.12
  -6  11  -8    0.97    0.81
   6 -11   8   -0.18    0.89
  -5  11  -9    4.20    0.95
   5 -11   9    5.66    1.09
  -4  11 -10    1.12    0.93
   4 -11  10   -1.44    0.84
  -3  11 -11   -0.57    0.94
   3 -11  11   -0.09    0.87
  -2  11 -12    4.19    1.12
   2 -11  12    6.14    1.00
  -1  11 -13   -0.21    0.89
   1 -11  13   -0.73    0.81
   1 -11  13    0.01    0.86
   1 -11  13    0.32    0.57
   0  11 -14   -0.35    1.04
   0 -11  14   -0.22    0.75
   0 -11  14    1.28    0.83
   0 -11  14    0.22    0.61
   1  11 -15    0.31    0.99
  -1 -11  15    0.85    0.85
  -1 -11  15   -0.60    0.75
  -1 -11  15   -0.44    0.69
   2  11 -16    1.43    1.05
  -2 -11  16    1.60    0.86
  -2 -11  16   -0.20    0.70
   3  11 -17   -1.60    1.04
  -3 -11  17   -0.52    0.78
  -3 -11  17    0.85    0.80
   4  11 -18   -0.53    1.09
  -4 -11  18   -0.89    0.76
  -4 -11  18    0.64    0.90
   5  11 -19    0.91    1.21
  -5 -11  19    2.28    1.01
   6  11 -20    0.29    1.26
  -6 -11  20    1.40    1.12
   7  11 -21   -0.19    1.27
  -7 -11  21   -0.69    1.04
   8  11 -22   -1.24    1.38
  -8 -11  22    0.51    1.22
  14 -12   1    0.40    1.26
  13 -12   2    0.71    1.27
  12 -12   3    1.21    1.24
  11 -12   4    3.74    1.26
  10 -12   5    2.05    1.11
  -9  12  -6   -0.57    0.73
   9 -12   6   -0.84    0.95
  -8  12  -7    0.93    0.76
   8 -12   7   -0.04    0.95
  -7  12  -8    2.47    0.87
   7 -12   8    2.23    0.95
  -6  12  -9    2.08    0.92
   6 -12   9    2.37    1.02
  -5  12 -10   -0.51    0.90
   5 -12  10   -0.74    0.82
  -4  12 -11    2.90    1.06
   4 -12  11    3.71    1.07
  -3  12 -12   -1.01    0.98
   3 -12  12    1.23    0.94
  -2  12 -13   -0.35    0.94
   2 -12  13    0.59    0.92
  -1  12 -14    1.03    0.98
   1 -12  14    2.27    0.93
   1 -12  14    2.75    0.92
   1 -12  14    1.20    0.61
   0  12 -15    2.12    1.13
   0 -12  15    1.09    0.84
   0 -12  15   -0.17    0.65
   0 -12  15    1.22    0.88
   1  12 -16   -0.44    1.07
  -1 -12  16    0.77    0.87
  -1 -12  16    1.13    0.81
  -1 -12  16    0.96    0.71
   2  12 -17    0.46    1.15
  -2 -12  17   -0.94    0.81
  -2 -12  17    0.79    0.80
   3  12 -18   -0.02    1.08
  -3 -12  18   -0.80    0.79
  -3 -12  18    0.62    0.83
   4  12 -19    1.61    1.23
  -4 -12  19   -0.81    0.86
   5  12 -20    0.78    1.23
  -5 -12  20   -0.62    0.96
   6  12 -21    1.02    1.30
  -6 -12  21    2.33    1.16
   7  12 -22   -0.74    1.30
  -7 -12  22    0.43    1.11
  13 -13   3    0.98    1.30
  12 -13   4    1.59    1.19
  11 -13   5   -0.60    1.19
  10 -13   6    0.42    1.11
  -9  13  -7    0.35    0.84
   9 -13   7   -0.40    1.04
  -8  13  -8    4.01    0.97
   8 -13   8    5.89    1.22
  -7  13  -9    0.47    0.83
   7 -13   9    0.11    0.91
  -6  13 -10    5.02    1.06
   6 -13  10    5.38    1.10
  -5  13 -11   12.19    1.34
   5 -13  11   10.49    1.38
  -4  13 -12    5.51    1.18
   4 -13  12    3.82    1.09
  -3  13 -13    0.86    1.05
   3 -13  13    0.40    0.97
  -2  13 -14    2.92    1.08
   2 -13  14    2.55    1.03
   2 -13  14    3.18    1.01
  -1  13 -15    2.11    1.05
   1 -13  15    3.87    0.97
   1 -13  15    1.50    0.65
   1 -13  15    2.34    0.97
   0  13 -16   -0.71    0.96
   0 -13  16    0.66    0.69
   0 -13  16    0.60    0.89
   0 -13  16    0.67    0.82
   1  13 -17    0.63    1.03
  -1 -13  17   -0.11    0.71
  -1 -13  17    1.43    0.91
   2  13 -18    0.73    1.18
  -2 -13  18   -0.04    0.84
  -2 -13  18   -1.19    0.72
   3  13 -19   -0.61    1.24
  -3 -13  19    1.41    0.90
  -3 -13  19    1.47    0.94
   4  13 -20    1.13    1.32
  -4 -13  20   -0.64    0.89
   5  13 -21    2.49    1.38
  -5 -13  21   -0.39    1.01
   6  13 -22    1.49    1.49
  -6 -13  22    1.26    1.10
  13 -14   4    0.88    1.43
  12 -14   5   -0.20    1.28
  11 -14   6    0.91    1.19
  10 -14   7    1.72    1.20
  -9  14  -8    0.16    0.82
   9 -14   8    2.09    1.17
  -8  14  -9   -0.62    0.82
   8 -14   9    0.92    1.05
  -7  14 -10   -0.08    0.88
   7 -14  10    0.81    1.08
  -6  14 -11    0.90    0.95
   6 -14  11    0.08    0.89
  -5  14 -12    0.19    1.00
   5 -14  12    0.56    0.98
  -4  14 -13    3.33    1.14
   4 -14  13    3.27    1.00
  -3  14 -14    2.88    1.18
   3 -14  14    3.05    1.09
  -2  14 -15    1.01    1.13
   2 -14  15    0.23    0.93
   2 -14  15    0.93    0.91
  -1  14 -16    1.34    1.07
   1 -14  16   -0.26    0.93
   1 -14  16    0.65    0.90
   0  14 -17    2.96    1.21
   0 -14  17    1.49    0.89
   0 -14  17    1.52    0.98
   1  14 -18    3.27    1.29
  -1 -14  18   -0.31    0.88
  -1 -14  18    0.39    0.77
   2  14 -19   -1.10    1.16
  -2 -14  19   -0.58    0.82
  -2 -14  19    1.69    0.94
   3  14 -20    0.24    1.28
  -3 -14  20    0.14    0.84
   4  14 -21   -0.22    1.30
  -4 -14  21   -0.13    0.94
   5  14 -22   -0.12    1.37
  -5 -14  22    0.52    1.06
  12 -15   6   -0.02    1.23
  11 -15   7   -1.31    1.13
  10 -15   8    0.87    1.21
   9 -15   9    2.41    1.20
  -8  15 -10    0.57    0.94
   8 -15  10    0.26    1.08
  -7  15 -11    1.32    0.96
   7 -15  11    0.19    1.06
  -6  15 -12   -0.49    0.98
   6 -15  12   -1.06    1.01
  -5  15 -13   -0.48    1.03
   5 -15  13    2.07    1.07
  -4  15 -14    0.45    1.10
   4 -15  14    1.12    1.06
  -3  15 -15   -0.67    1.08
   3 -15  15   -1.46    0.95
  -2  15 -16   -0.26    1.14
   2 -15  16    1.29    1.01
   2 -15  16    2.87    1.07
  -1  15 -17    0.61    1.12
   1 -15  17    0.92    0.92
   1 -15  17    0.82    1.01
   0  15 -18    1.40    1.27
   0 -15  18   -0.89    0.91
   1  15 -19    0.15    1.25
  -1 -15  19    1.27    0.97
   2  15 -20    1.18    1.31
   3  15 -21   -0.27    1.30
   4  15 -22   -1.57    1.34
  12 -16   7   -0.10    1.31
  11 -16   8   -1.69    1.19
  10 -16   9    0.46    1.21
   9 -16  10    2.92    1.26
  -8  16 -11   -1.18    0.94
   8 -16  11    0.05    1.12
  -7  16 -12   -1.18    0.93
   7 -16  12    0.77    1.14
  -6  16 -13   -0.08    1.09
   6 -16  13   -0.23    0.97
  -5  16 -14   -2.22    1.07
   5 -16  14   -1.07    1.01
  -4  16 -15    0.26    1.19
   4 -16  15   -1.56    0.95
  -3  16 -16    2.40    1.16
   3 -16  16   -0.61    1.06
   3 -16  16    1.24    1.06
  -2  16 -17   -0.24    1.09
   2 -16  17    0.01    0.97
   2 -16  17    0.08    1.01
  -1  16 -18   -0.09    1.12
   1 -16  18    0.85    1.01
   0  16 -19   -1.17    1.23
   0 -16  19    1.14    1.01
   1  16 -20    0.80    1.30
  -1 -16  20    0.41    0.99
   2  16 -21    1.53    1.41
   3  16 -22    0.18    1.44
  11 -17   9    0.12    1.32
  10 -17  10   -0.43    1.24
   9 -17  11   -0.97    1.16
  -8  17 -12   -0.15    1.09
   8 -17  12    1.99    1.14
  -7  17 -13   -0.45    1.03
   7 -17  13   -0.27    1.14
  -6  17 -14   -0.29    1.11
   6 -17  14   -0.02    1.10
  -5  17 -15   -0.62    1.15
   5 -17  15   -0.01    1.12
  -4  17 -16   -1.29    1.14
   4 -17  16   -0.98    1.02
  -3  17 -17   -1.40    1.22
   3 -17  17    2.17    1.15
  -2  17 -18    1.07    1.31
   2 -17  18   -0.13    1.02
  -1  17 -19    3.18    1.40
   1 -17  19   -2.10    0.90
   0  17 -20    1.17    1.37
   0 -17  20    0.18    1.02
   1  17 -21    0.18    1.35
   2  17 -22   -1.44    1.36
  10 -18  11   -1.88    1.19
   9 -18  12    0.04    1.26
  -8  18 -13    0.45    1.07
   8 -18  13   -0.09    1.18
  -7  18 -14    1.14    1.15
   7 -18  14   -0.51    1.13
  -6  18 -15   -1.89    1.11
   6 -18  15   -3.22    1.04
  -5  18 -16   -0.10    1.22
   5 -18  16   -0.75    1.08
  -4  18 -17    1.85    1.35
   4 -18  17    1.69    1.17
  -3  18 -18    0.02    1.30
   3 -18  18   -0.22    1.08
  -2  18 -19   -0.55    1.31
   2 -18  19    0.91    1.11
  -1  18 -20   -0.75    1.31
   1 -18  20    0.61    1.10
   0  18 -21   -0.46    1.29
   1  18 -22    0.57    1.46
   9 -19  13    1.39    1.37
   8 -19  14   -0.14    1.24
  -7  19 -15    2.80    1.28
   7 -19  15    0.47    1.20
  -6  19 -16   -0.65    1.21
   6 -19  16    0.68    1.24
  -5  19 -17   -1.51    1.25
   5 -19  17    1.29    1.23
  -4  19 -18   -0.54    1.33
   4 -19  18    0.04    1.18
  -3  19 -19    0.83    1.35
   3 -19  19    0.53    1.11
  -2  19 -20    0.84    1.32
   2 -19  20    0.90    1.16
  -1  19 -21    0.82    1.50
   5 -20  18    1.12    1.23
  -2  22 -16    1.32    1.45
  -3  22 -15   -0.02    1.33
  -4  22 -14    1.09    1.32
   5 -22  13   -0.36    1.15
  -5  22 -13    0.74    1.26
   6 -22  12    1.55    1.28
  -6  22 -12    1.51    1.30
   7 -22  11   -0.55    1.16
  -7  22 -11   -0.80    1.08
   1  21 -18   -0.84    1.38
   0  21 -17    0.90    1.42
  -1  21 -16   -1.66    1.28
  -2  21 -15    0.02    1.17
   3 -21  14    0.56    1.04
  -3  21 -14   -1.93    1.17
   4 -21  13   -0.15    1.12
  -4  21 -13    1.63    1.25
   5 -21  12    0.77    1.16
  -5  21 -12    2.31    1.18
   6 -21  11   -0.73    1.14
  -6  21 -11    0.38    1.18
   7 -21  10    1.15    1.24
  -7  21 -10    0.13    1.09
   8 -21   9    1.32    1.26
  -8  21  -9   -0.69    1.07
   9 -21   8   -1.85    1.23
   2  20 -18    0.38    1.36
   1  20 -17    0.89    1.39
   0  20 -16    1.04    1.39
  -1  20 -15   -0.54    1.20
  -2  20 -14   -1.25    1.21
   3 -20  13    0.92    1.05
  -3  20 -13   -0.83    1.18
   4 -20  12    0.59    1.04
  -4  20 -12    0.55    1.14
   5 -20  11   -1.16    0.99
  -5  20 -11    1.91    1.16
   6 -20  10   -0.32    1.11
  -6  20 -10    0.31    1.13
   7 -20   9    0.13    1.16
  -7  20  -9    1.13    1.09
   8 -20   8   -1.35    1.11
  -8  20  -8   -0.53    1.02
   9 -20   7    2.05    1.33
  -9  20  -7   -0.03    1.10
  10 -20   6    1.10    1.36
  -4 -19  19   -1.56    1.15
   4  19 -19   -1.37    1.40
  -3 -19  18   -2.35    1.07
   3  19 -18   -0.54    1.31
   2  19 -17    1.44    1.30
   1  19 -16   -0.96    1.21
   0  19 -15    1.73    1.30
  -1  19 -14    2.25    1.28
   2 -19  13    0.67    1.03
  -2  19 -13   -0.57    1.17
   3 -19  12   -1.08    0.93
  -3  19 -12   -0.81    1.13
   4 -19  11    1.83    1.06
  -4  19 -11   -0.67    1.06
   5 -19  10    0.88    1.07
  -5  19 -10   -0.45    1.04
   6 -19   9   -1.32    1.05
  -6  19  -9    0.15    1.05
   7 -19   8    0.05    1.13
  -7  19  -8    1.06    1.05
   8 -19   7    1.01    1.19
  -8  19  -7    1.46    1.11
   9 -19   6    3.13    1.35
  -9  19  -6   -1.38    0.97
  10 -19   5   -0.10    1.18
 -10  19  -5   -0.83    1.00
  11 -19   4    1.22    1.44
  -5 -18  19   -0.85    1.14
   5  18 -19   -0.39    1.24
  -4 -18  18   -0.03    1.17
   4  18 -18   -1.65    1.16
  -3 -18  17   -0.12    1.09
   3  18 -17   -0.64    1.29
  -2 -18  16   -1.34    1.01
   2  18 -16    0.88    1.30
   1  18 -15    0.44    1.17
   0  18 -14    5.68    1.40
   1 -18  13    1.06    0.90
  -1  18 -13    1.01    1.15
   2 -18  12    0.81    0.93
  -2  18 -12    0.09    1.14
   3 -18  11   -0.58    0.93
  -3  18 -11    1.23    1.03
   4 -18  10    0.14    0.97
  -4  18 -10   -1.04    0.96
   5 -18   9    0.17    1.01
  -5  18  -9   -0.21    0.98
   6 -18   8    1.14    1.11
  -6  18  -8    1.52    1.07
   7 -18   7    1.90    1.16
  -7  18  -7    1.94    1.06
   8 -18   6   -0.96    0.97
  -8  18  -6    0.16    0.93
   9 -18   5    0.11    1.19
  -9  18  -5    0.03    0.95
  10 -18   4    1.20    1.35
 -10  18  -4    1.97    1.07
  11 -18   3   -1.71    1.26
  -6 -17  19   -0.59    1.19
   6  17 -19    1.04    1.27
  -5 -17  18   -1.23    1.08
   5  17 -18   -1.91    1.09
  -4 -17  17   -0.37    1.04
   4  17 -17    1.45    1.20
  -3 -17  16   -1.70    0.95
   3  17 -16   -0.95    1.15
  -2 -17  15    0.61    1.03
   2  17 -15   -0.66    1.11
   1  17 -14   -0.32    1.11
   0 -17  13    0.81    0.83
   0  17 -13    1.43    1.15
   1 -17  12    0.24    0.83
  -1  17 -12   -0.83    1.05
   2 -17  11    0.38    0.84
  -2  17 -11    0.14    1.03
   3 -17  10    0.70    0.90
  -3  17 -10   -0.32    1.01
   4 -17   9    0.25    0.96
  -4  17  -9    1.00    1.02
   5 -17   8    1.48    1.02
  -5  17  -8    2.53    1.05
   6 -17   7    0.36    1.06
  -6  17  -7    0.83    0.98
   7 -17   6    0.56    1.08
  -7  17  -6   -0.55    0.91
   8 -17   5    0.80    1.20
  -8  17  -5    1.27    0.97
   9 -17   4    1.73    1.24
  -9  17  -4   -0.29    0.92
  10 -17   3    2.21    1.34
 -10  17  -3   -1.51    0.89
  11 -17   2    2.60    1.38
  12 -17   1   -1.15    1.27
  -7 -16  19    0.05    1.26
   7  16 -19    1.12    1.34
  -6 -16  18   -1.79    1.15
   6  16 -18    2.09    1.25
  -5 -16  17   -0.72    1.14
   5  16 -17    0.55    1.21
  -4 -16  16    0.49    1.07
   4  16 -16    0.32    1.13
  -3 -16  15   -1.52    0.98
   3  16 -15    0.86    1.10
  -2 -16  14   -0.04    0.88
   2  16 -14    0.48    1.08
  -1 -16  13    0.34    0.76
   1  16 -13   -0.35    1.02
   0 -16  12    2.93    0.91
   0  16 -12    3.93    1.16
   1 -16  11    1.59    0.86
  -1  16 -11   -1.65    0.92
   2 -16  10    0.14    0.83
  -2  16 -10    0.69    0.93
   3 -16   9    3.25    0.99
  -3  16  -9    2.32    1.05
   4 -16   8    0.60    0.84
  -4  16  -8    0.08    0.82
   5 -16   7    0.38    0.98
  -5  16  -7   -0.13    0.90
   6 -16   6    1.27    1.06
  -6  16  -6    0.42    0.93
   7 -16   5   -0.88    1.01
  -7  16  -5   -0.19    0.86
   8 -16   4   -0.25    1.06
  -8  16  -4    0.00    0.92
   9 -16   3   -0.01    1.20
  -9  16  -3    0.98    0.92
  10 -16   2   -1.53    1.14
 -10  16  -2    0.07    0.93
  11 -16   1    1.39    1.30
  12 -16   0   -1.98    1.22
  -7 -15  18   -0.33    1.23
   7  15 -18    0.06    1.22
  -6 -15  17    1.06    1.16
   6  15 -17   -0.23    1.17
  -5 -15  16   -0.05    1.04
   5  15 -16   -0.93    1.02
  -4 -15  15   -1.06    0.95
   4  15 -15   -0.25    1.02
  -3 -15  14    1.36    0.99
   3  15 -14   -0.79    0.97
  -2 -15  13   -0.21    0.87
   2  15 -13    0.03    1.03
  -1 -15  12   16.75    1.08
  -1 -15  12   16.51    1.34
  -1 -15  12   13.53    1.36
   1  15 -12   14.68    1.54
   0 -15  11    4.52    0.96
   0  15 -11    3.66    1.13
   1 -15  10    0.24    0.80
  -1  15 -10    0.71    0.98
   2 -15   9    3.90    0.97
  -2  15  -9    5.11    1.17
   3 -15   8    1.06    0.89
  -3  15  -8    1.29    0.92
   4 -15   7   -0.73    0.86
  -4  15  -7   -0.88    0.77
   5 -15   6   -0.06    0.91
  -5  15  -6   -0.38    0.79
   6 -15   5   -1.22    0.82
  -6  15  -5    0.88    0.79
   7 -15   4    0.16    1.02
  -7  15  -4    0.45    0.80
   8 -15   3    1.78    1.15
  -8  15  -3    3.85    0.99
   9 -15   2   -0.45    1.12
  -9  15  -2   -1.29    0.83
  10 -15   1    0.47    1.19
 -10  15  -1    0.17    0.87
  11 -15   0    2.78    1.33
  12 -15  -1   -1.43    1.17
  -8 -14  18    0.35    1.36
   8  14 -18    2.38    1.30
  -7 -14  17    3.18    1.28
   7  14 -17    3.15    1.27
  -6 -14  16   -1.29    1.01
   6  14 -16    1.56    1.19
  -5 -14  15    0.57    1.01
   5  14 -15    0.34    1.05
  -4 -14  14    1.25    1.00
   4  14 -14    1.43    1.06
  -3 -14  13    0.11    0.89
   3  14 -13   -0.37    0.90
  -2 -14  12    3.52    0.79
  -2 -14  12    1.94    0.91
   2  14 -12    2.22    1.03
  -1 -14  11    0.58    0.90
  -1 -14  11    0.00    0.75
   1  14 -11    1.80    1.03
   0 -14  10   11.46    1.14
   0  14 -10    9.93    1.28
   1 -14   9    2.28    0.86
  -1  14  -9    3.35    1.05
   2 -14   8    0.05    0.82
  -2  14  -8    1.28    0.97
   3 -14   7    6.17    1.06
  -3  14  -7    6.02    1.12
   4 -14   6    0.61    0.91
  -4  14  -6    3.18    0.95
   5 -14   5    0.45    0.99
  -5  14  -5    1.53    0.91
   6 -14   4    1.11    0.98
  -6  14  -4   -0.29    0.73
   7 -14   3   -0.78    0.96
  -7  14  -3   -1.02    0.77
   8 -14   2    1.03    1.09
  -8  14  -2    0.84    0.85
   9 -14   1   -0.77    1.09
  -9  14  -1    0.62    0.84
  10 -14   0   -0.25    1.14
 -10  14   0    0.09    0.82
  11 -14  -1    2.12    1.24
  12 -14  -2    0.17    1.29
  13 -14  -3    1.03    1.37
  -9 -13  18   -0.55    1.25
   9  13 -18    2.41    1.23
  -8 -13  17   -0.49    1.19
   8  13 -17   -0.32    1.06
  -7 -13  16    0.32    1.14
   7  13 -16   -0.13    1.10
  -6 -13  15   -0.16    1.05
   6  13 -15    1.79    1.13
  -5 -13  14   -0.66    0.95
   5  13 -14   -1.49    1.00
  -4 -13  13    0.91    0.98
   4  13 -13   -0.22    0.92
  -3 -13  12    1.32    0.93
  -3 -13  12    0.80    0.66
   3  13 -12    0.59    0.93
  -2 -13  11    3.98    0.85
  -2 -13  11    3.32    1.04
   2  13 -11    4.55    1.13
  -1 -13  10    7.00    1.11
  -1 -13  10   11.17    1.08
   1  13 -10    8.17    1.19
   0 -13   9    0.35    0.71
   0  13  -9    0.38    0.89
   1 -13   8   -1.65    0.72
  -1  13  -8   -0.29    0.87
   2 -13   7    1.93    0.86
  -2  13  -7    1.90    0.95
   3 -13   6    1.91    0.88
  -3  13  -6    1.04    0.88
   4 -13   5    9.16    1.17
  -4  13  -5    9.10    1.08
   5 -13   4    6.93    1.11
  -5  13  -4    7.94    1.10
   6 -13   3    5.88    1.14
  -6  13  -3    4.70    0.99
   7 -13   2    1.22    1.06
  -7  13  -2    1.38    0.85
   8 -13   1    2.56    1.10
  -8  13  -1    3.88    0.94
   9 -13   0    0.03    1.05
  -9  13   0   -0.16    0.79
  10 -13  -1    0.63    1.15
 -10  13   1   -1.76    0.73
  11 -13  -2   -0.51    1.12
  12 -13  -3   -0.28    1.26
  13 -13  -4    2.11    1.37
  -9 -12  17   -1.19    1.24
   9  12 -17    1.49    1.14
  -8 -12  16    0.35    1.22
   8  12 -16    1.23    1.07
  -7 -12  15    0.35    1.08
   7  12 -15    0.80    1.05
  -6 -12  14   -0.46    1.00
   6  12 -14    0.25    0.96
  -5 -12  13    3.71    1.09
   5  12 -13    2.47    1.01
  -4 -12  12    4.67    1.07
   4  12 -12    5.68    1.09
  -3 -12  11    2.93    0.71
  -3 -12  11    2.72    0.99
   3  12 -11    3.56    0.99
  -2 -12  10    4.35    0.97
  -2 -12  10    3.99    0.79
   2  12 -10    2.70    0.93
  -1 -12   9   17.47    1.26
  -1 -12   9   15.00    1.33
   1  12  -9   15.44    1.35
   0 -12   8    7.11    0.91
   0  12  -8    9.16    1.12
   1 -12   7    1.70    0.73
  -1  12  -7    2.81    0.82
   2 -12   6    2.93    0.82
  -2  12  -6    3.25    0.90
   3 -12   5    0.62    0.80
  -3  12  -5    2.39    0.84
   4 -12   4    2.71    0.85
  -4  12  -4    1.73    0.83
   5 -12   3   -0.99    0.86
  -5  12  -3   -0.32    0.73
   6 -12   2    1.59    0.99
  -6  12  -2    1.25    0.80
   7 -12   1    4.98    1.17
  -7  12  -1    3.75    0.85
   8 -12   0    0.65    1.01
  -8  12   0    1.04    0.81
   9 -12  -1   -0.65    1.03
  -9  12   1   -0.08    0.74
  10 -12  -2    1.19    0.98
 -10  12   2    0.29    0.78
  11 -12  -3   -0.62    1.18
  12 -12  -4   -0.08    1.17
  13 -12  -5    0.44    1.30
 -10 -11  17   -0.73    1.34
  10  11 -17    0.42    1.10
  -9 -11  16   -0.37    1.24
   9  11 -16    0.35    1.03
  -8 -11  15   -0.35    1.18
   8  11 -15    2.09    1.06
  -7 -11  14    1.67    1.14
   7  11 -14    0.17    0.95
  -6 -11  13    1.51    1.04
   6  11 -13    1.12    0.92
  -5 -11  12    0.18    0.93
   5  11 -12    0.19    0.92
  -4 -11  11   29.12    1.46
  -4 -11  11   27.54    1.91
   4  11 -11   28.52    1.79
  -3 -11  10    2.95    0.94
  -3 -11  10    2.09    0.65
   3  11 -10    2.75    0.98
  -2 -11   9   -1.25    0.58
  -2 -11   9   -0.47    0.81
   2  11  -9   -0.66    0.77
  -1 -11   8    0.02    0.75
  -1 -11   8    0.75    0.60
   1  11  -8    0.73    0.79
   0 -11   7    2.54    0.68
   0  11  -7    2.15    0.81
   1 -11   6    1.53    0.66
  -1  11  -6    1.13    0.76
   2 -11   5    0.71    0.69
  -2  11  -5    0.48    0.66
   3 -11   4   21.35    1.36
  -3  11  -4   22.09    1.40
   4 -11   3    0.06    0.79
  -4  11  -3   -0.15    0.64
   5 -11   2    0.47    0.87
  -5  11  -2    0.61    0.66
   6 -11   1    5.79    1.11
  -6  11  -1    7.09    0.99
   7 -11   0    1.86    0.95
  -7  11   0    2.23    0.84
   8 -11  -1    0.04    0.98
  -8  11   1    1.45    0.79
   9 -11  -2    0.09    1.00
  -9  11   2    0.14    0.78
  10 -11  -3   -0.20    0.92
 -10  11   3   -0.64    0.72
  11 -11  -4    1.94    1.18
  12 -11  -5    1.83    1.25
  13 -11  -6   -0.13    1.25
 -11 -10  17    0.69    1.46
  11  10 -17   -0.80    1.09
 -10 -10  16   -0.10    1.32
  10  10 -16    0.88    1.10
  -9 -10  15   -0.12    1.09
   9  10 -15   -0.21    1.03
  -8 -10  14    0.00    1.13
   8  10 -14    0.67    0.93
  -7 -10  13    3.49    1.17
   7  10 -13    2.80    0.97
  -6 -10  12    4.85    1.16
   6  10 -12    1.97    0.93
  -5 -10  11   -0.40    0.93
   5  10 -11   -0.65    0.84
  -4 -10  10    4.51    0.64
  -4 -10  10    3.12    0.96
   4  10 -10    2.28    0.93
  -3 -10   9    9.76    0.85
  -3 -10   9   10.52    1.13
   3  10  -9    8.58    1.08
  -2 -10   8    9.56    0.86
  -2 -10   8    9.69    1.06
   2  10  -8    8.91    1.01
  -1 -10   7   20.10    1.23
  -1 -10   7   22.93    1.50
   1  10  -7   21.76    1.39
   0 -10   6    9.85    0.88
   0  10  -6    7.41    0.91
   1 -10   5   53.72    2.31
  -1  10  -5   56.13    2.42
   2 -10   4   -0.65    0.60
  -2  10  -4    0.67    0.66
   3 -10   3   -0.02    0.66
  -3  10  -3    1.01    0.60
   4 -10   2   25.98    1.56
  -4  10  -2   24.07    1.50
   5 -10   1   -0.58    0.80
  -5  10  -1    0.62    0.69
   6 -10   0    0.80    0.91
  -6  10   0   -0.07    0.70
   7 -10  -1    5.45    1.12
  -7  10   1    5.41    0.92
   8 -10  -2    2.40    1.06
  -8  10   2    3.26    0.85
   9 -10  -3   -0.29    0.84
  -9  10   3    1.91    0.77
  10 -10  -4    2.73    1.15
 -10  10   4    3.06    0.80
  11 -10  -5    0.76    1.11
  12 -10  -6    0.65    1.16
  13 -10  -7    0.63    1.27
 -11  -9  16   -0.21    1.35
  11   9 -16    1.13    1.08
 -10  -9  15    2.95    1.38
  10   9 -15    0.42    1.05
  -9  -9  14   -0.72    1.18
   9   9 -14   -0.49    0.91
  -8  -9  13   -0.80    1.07
   8   9 -13    0.47    0.91
  -7  -9  12    2.89    1.12
   7   9 -12    5.41    0.99
  -6  -9  11    6.94    1.20
   6   9 -11    3.79    0.95
  -5  -9  10    2.08    0.97
   5   9 -10    0.55    0.83
  -4  -9   9   -0.31    0.74
  -4  -9   9    0.18    0.49
   4   9  -9    0.05    0.72
  -3  -9   8    0.97    0.78
  -3  -9   8    1.39    0.51
   3   9  -8    1.63    0.76
  -2  -9   7    2.29    0.75
  -2  -9   7    1.36    0.52
   2   9  -7    1.94    0.65
  -1  -9   6    2.37    0.53
  -1  -9   6    2.01    0.70
   1   9  -6    1.68    0.67
   0  -9   5   54.01    2.20
   0   9  -5   53.27    2.28
   1  -9   4   11.79    0.97
  -1   9  -4   12.64    1.00
   2  -9   3   -0.37    0.57
  -2   9  -3   -0.85    0.54
   3  -9   2    2.90    0.68
  -3   9  -2    3.02    0.67
   4  -9   1   17.85    1.32
  -4   9  -1   19.14    1.20
   5  -9   0    0.08    0.75
  -5   9   0    0.37    0.62
   6  -9  -1   -0.10    0.83
  -6   9   1    0.69    0.69
   7  -9  -2    0.71    0.92
  -7   9   2    0.44    0.69
   8  -9  -3   -0.03    0.92
  -8   9   3    0.62    0.73
   9  -9  -4    1.60    1.02
  -9   9   4    0.34    0.69
  10  -9  -5    0.97    1.02
 -10   9   5    0.00    0.70
  11  -9  -6    1.88    1.16
  12  -9  -7    0.18    1.18
  13  -9  -8    0.86    1.25
 -13   9   8   -0.72    1.03
 -11  -8  15    0.08    1.20
  11   8 -15    0.48    1.02
 -10  -8  14   -0.18    1.09
  10   8 -14   -0.10    0.95
  -9  -8  13    0.77    1.19
   9   8 -13    0.66    0.88
  -8  -8  12   -0.32    1.04
   8   8 -12    0.07    0.82
  -7  -8  11    3.79    1.08
   7   8 -11    5.37    1.00
  -6  -8  10    2.19    1.01
   6   8 -10    2.49    0.85
  -5  -8   9    1.50    0.40
  -5  -8   9    0.35    0.90
   5   8  -9    0.38    0.74
  -4  -8   8    7.47    1.03
   4   8  -8    5.31    0.82
  -3  -8   7    2.03    0.76
  -3  -8   7    0.87    0.43
   3   8  -7    1.40    0.64
  -2  -8   6   17.64    0.93
  -2  -8   6   14.70    1.21
   2   8  -6   11.97    1.00
  -1  -8   5    3.28    0.69
  -1  -8   5    1.90    0.51
   1   8  -5    2.00    0.59
   0  -8   4   -0.62    0.48
   0   8  -4    0.93    0.54
   1  -8   3    1.61    0.55
  -1   8  -3    2.17    0.59
   2  -8   2    5.46    0.73
  -2   8  -2    3.16    0.62
   3  -8   1    1.05    0.64
  -3   8  -1    1.60    0.52
   4  -8   0    6.11    0.86
  -4   8   0    6.31    0.76
   5  -8  -1   11.15    1.04
  -5   8   1   12.56    1.00
   6  -8  -2    1.68    0.84
  -6   8   2    1.18    0.65
   7  -8  -3   -0.11    0.82
  -7   8   3   -0.18    0.66
   8  -8  -4    0.47    0.94
  -8   8   4   -0.17    0.66
   9  -8  -5   -0.49    0.94
  -9   8   5    0.36    0.66
  10  -8  -6    3.98    1.17
 -10   8   6    4.23    0.83
  11  -8  -7    0.66    1.08
  12  -8  -8    0.05    1.12
  13  -8  -9    0.21    1.29
 -13   8   9   -0.15    1.09
 -12  -7  15    0.94    1.45
  12   7 -15    0.36    1.05
 -11  -7  14   -1.86    1.20
  11   7 -14    0.79    0.94
 -10  -7  13    0.94    1.29
  10   7 -13    0.13    0.87
  -9  -7  12    0.25    1.11
   9   7 -12    0.11    0.81
  -8  -7  11    2.83    1.07
   8   7 -11    2.07    0.81
  -7  -7  10    0.73    0.94
   7   7 -10    0.09    0.78
  -6  -7   9   -0.32    0.92
   6   7  -9   -0.83    0.68
  -5  -7   8    4.93    1.01
  -5  -7   8    6.56    0.52
   5   7  -8    6.52    0.82
   5   7  -8    6.27    0.70
  -4  -7   7    3.15    0.33
  -4  -7   7    3.01    0.81
   4   7  -7    4.62    0.61
   4   7  -7    3.46    0.66
  -3  -7   6    1.48    0.68
   3   7  -6    1.29    0.55
   3   7  -6    2.13    0.49
  -2  -7   5    1.03    0.62
  -2  -7   5    0.78    0.40
   2   7  -5    0.63    0.43
   2   7  -5    0.82    0.52
  -1  -7   4    1.23    0.43
  -1  -7   4    1.73    0.61
   1   7  -4    1.14    0.52
   0  -7   3   36.59    1.55
   0   7  -3   36.35    1.63
   1  -7   2    0.78    0.52
  -1   7  -2    1.07    0.51
   2  -7   1   -0.66    0.52
  -2   7  -1   -0.04    0.48
   3  -7   0    0.81    0.61
  -3   7   0    0.41    0.50
   4  -7  -1    3.36    0.73
  -4   7   1    4.05    0.65
   5  -7  -2   13.08    1.10
  -5   7   2   14.26    1.05
   6  -7  -3   -0.52    0.70
  -6   7   3    2.05    0.65
   7  -7  -4    0.95    0.88
  -7   7   4    0.59    0.64
   8  -7  -5    0.55    0.92
  -8   7   5   -0.14    0.63
   9  -7  -6   -0.81    0.88
  -9   7   6   -0.75    0.67
  10  -7  -7    3.56    1.12
 -10   7   7    4.03    0.83
  11  -7  -8    0.79    1.08
  12  -7  -9    1.62    1.16
  13  -7 -10    0.83    1.24
 -13   7  10    0.84    1.05
 -12  -6  14   -0.50    1.32
  12   6 -14   -0.33    0.94
 -11  -6  13   -0.65    1.24
  11   6 -13   -0.52    0.93
 -10  -6  12    0.79    1.06
  10   6 -12    1.19    0.90
  -9  -6  11    0.02    1.06
   9   6 -11    1.46    0.85
  -8  -6  10   -1.06    0.99
   8   6 -10    0.02    0.74
  -7  -6   9    0.73    0.97
   7   6  -9    0.86    0.76
  -6  -6   8    2.90    0.98
   6   6  -8    2.08    0.71
   6   6  -8    2.08    0.59
  -5  -6   7    8.18    1.05
   5   6  -7   10.58    0.84
   5   6  -7    9.50    0.80
  -4  -6   6   20.15    1.39
  -4  -6   6   18.14    0.81
   4   6  -6   19.01    1.00
   4   6  -6   17.11    1.05
  -3  -6   5    0.49    0.18
  -3  -6   5    2.01    0.67
   3   6  -5    1.05    0.40
   3   6  -5    0.91    0.49
  -2  -6   4    1.96    0.57
  -2  -6   4    1.02    0.32
   2   6  -4    2.09    0.51
   2   6  -4    2.28    0.42
  -1  -6   3    3.97    0.70
  -1  -6   3    4.93    0.50
   1   6  -3    6.64    0.55
   1   6  -3    4.64    0.57
   0  -6   2   17.08    0.93
   0   6  -2   16.69    1.00
   1  -6   1   -0.35    0.47
  -1   6  -1    0.23    0.45
   2  -6   0   37.77    1.66
  -2   6   0   36.47    1.62
   3  -6  -1   16.94    1.14
  -3   6   1   18.34    1.03
   4  -6  -2    1.15    0.64
  -4   6   2    1.13    0.53
   5  -6  -3   49.15    2.17
  -5   6   3   49.90    2.14
   6  -6  -4    0.78    0.76
  -6   6   4    1.71    0.60
   7  -6  -5    2.31    0.90
  -7   6   5    1.83    0.67
   8  -6  -6   -0.78    0.88
  -8   6   6   -0.38    0.65
   9  -6  -7    6.36    1.15
  -9   6   7    4.77    0.82
  10  -6  -8    0.82    1.01
 -10   6   8    0.13    0.66
  11  -6  -9   -1.33    0.98
  12  -6 -10    0.84    1.13
 -12   6  10    0.69    0.97
  13  -6 -11    2.10    1.27
 -13   6  11   -1.27    1.08
 -13  -5  14    0.53    1.44
  13   5 -14   -0.52    1.05
 -12  -5  13    1.14    1.32
  12   5 -13    0.99    0.97
 -11  -5  12   -0.20    1.15
  11   5 -12    0.60    0.93
 -10  -5  11   -0.09    1.11
  10   5 -11    0.29    0.86
  -9  -5  10    1.09    0.99
   9   5 -10    1.47    0.82
  -8  -5   9   10.80    1.36
   8   5  -9   11.38    1.07
  -7  -5   8    0.27    0.82
   7   5  -8    0.28    0.69
   7   5  -8    0.80    0.55
  -6  -5   7    8.95    1.09
   6   5  -7    9.18    0.85
   6   5  -7   10.54    0.78
  -5  -5   6    5.12    0.89
   5   5  -6    5.61    0.56
   5   5  -6    5.40    0.62
  -4  -5   5   23.85    1.42
   4   5  -5   24.24    1.13
   4   5  -5   23.30    1.09
  -3  -5   4    5.28    0.39
  -3  -5   4    4.84    0.68
   3   5  -4    5.96    0.48
   3   5  -4    6.24    0.54
  -2  -5   3   16.75    1.04
   2   5  -3   16.22    0.87
   2   5  -3   14.93    0.81
  -1  -5   2    0.07    0.35
  -1  -5   2    0.60    0.56
   1   5  -2    0.45    0.41
   1   5  -2   -0.52    0.34
   0  -5   1   13.31    0.80
   0   5  -1   16.09    0.88
   0   5  -1   14.54    0.88
   1  -5   0   28.01    1.28
  -1   5   0   27.52    1.28
   2  -5  -1    2.98    0.56
  -2   5   1    2.75    0.48
   3  -5  -2   -0.25    0.48
  -3   5   2    0.53    0.43
   4  -5  -3    8.86    0.86
  -4   5   3    8.60    0.76
   5  -5  -4    8.03    0.93
  -5   5   4    8.48    0.80
   6  -5  -5   19.03    1.37
  -6   5   5   19.42    1.20
   7  -5  -6    2.51    0.91
  -7   5   6    1.96    0.68
   8  -5  -7    2.76    1.01
  -8   5   7    3.68    0.74
   9  -5  -8    1.51    0.96
  -9   5   8    1.59    0.67
  10  -5  -9    1.94    1.02
  11  -5 -10   -0.38    1.04
  12  -5 -11   -0.90    1.08
 -12   5  11   -0.13    1.02
  13  -5 -12    0.51    1.26
 -13   5  12    0.74    1.21
 -13  -4  13    0.70    1.40
  13   4 -13    1.14    1.08
 -12  -4  12    1.43    1.30
  12   4 -12    0.57    0.99
 -11  -4  11    1.31    1.22
  11   4 -11    2.28    0.91
 -10  -4  10    0.56    1.09
  10   4 -10    0.02    0.73
  -9  -4   9    1.32    1.02
   9   4  -9   -0.47    0.74
  -8  -4   8    1.62    1.06
   8   4  -8    4.75    0.82
  -7  -4   7    0.06    0.91
   7   4  -7    2.58    0.70
  -6  -4   6    1.08    0.82
   6   4  -6    1.46    0.57
   6   4  -6    2.02    0.46
  -5  -4   5   13.68    1.17
   5   4  -5   13.34    0.79
   5   4  -5   12.93    0.82
   5   4  -5   14.25    0.80
  -4  -4   4   61.33    2.57
   4   4  -4   59.91    2.24
   4   4  -4   61.58    2.23
  -3  -4   3    3.31    0.61
   3   4  -3    3.33    0.41
   3   4  -3    4.03    0.45
   3   4  -3    4.28    0.37
  -2  -4   2    1.62    0.57
   2   4  -2    1.82    0.31
   2   4  -2    1.27    0.34
  -1  -4   1   -0.15    0.16
  -1  -4   1    0.88    0.53
   1   4  -1    0.59    0.34
   1   4  -1    0.20    0.32
   0  -4   0   52.69    1.91
   0   4   0   50.84    1.92
   0   4   0   50.26    1.91
   1  -4  -1    1.83    0.44
  -1   4   1    1.06    0.40
   2  -4  -2  205.54    7.14
  -2   4   2  203.58    7.13
   3  -4  -3   14.08    1.02
  -3   4   3   14.04    0.96
   4  -4  -4    3.17    0.66
  -4   4   4    3.15    0.56
   5  -4  -5   86.48    3.34
  -5   4   5   84.60    3.28
   6  -4  -6   19.78    1.40
  -6   4   6   19.29    1.21
   7  -4  -7    1.01    0.86
  -7   4   7    2.69    0.68
   8  -4  -8    2.67    0.98
  -8   4   8    4.11    0.73
   9  -4  -9   -0.35    0.92
  -9   4   9   -0.89    0.59
  10  -4 -10    2.85    1.11
  11  -4 -11    0.01    1.04
 -11   4  11    0.46    1.03
  12  -4 -12    1.13    1.26
 -12   4  12    0.53    1.00
  13  -4 -13    0.64    1.39
 -13   4  13    1.67    1.25
 -13  -3  12    0.30    1.22
  13   3 -12    1.00    1.06
 -12  -3  11    0.77    1.27
  12   3 -11    0.65    0.95
 -11  -3  10   -0.37    1.13
  11   3 -10    0.82    0.82
 -10  -3   9    0.30    1.04
  10   3  -9    0.77    0.79
  -9  -3   8    0.62    1.01
   9   3  -8    0.21    0.74
  -8  -3   7    1.08    0.95
   8   3  -7    0.68    0.67
  -7  -3   6   11.36    1.21
   7   3  -6   13.81    0.98
   7   3  -6   12.30    0.88
  -6  -3   5    4.70    0.88
   6   3  -5    5.51    0.51
   6   3  -5    4.02    0.58
  -5  -3   4   16.32    1.24
   5   3  -4   14.49    0.81
   5   3  -4   14.79    0.77
  -4  -3   3   17.22    1.19
   4   3  -3   15.14    0.69
   4   3  -3   14.66    0.71
  -3  -3   2    9.25    0.81
   3   3  -2    9.13    0.45
  -2  -3   1    9.12    0.75
   2   3  -1    9.80    0.73
   2   3  -1    9.37    0.43
   2   3  -1    9.35    0.45
  -1  -3   0    1.86    0.44
  -1  -3   0    1.33    0.24
  -1  -3   0    1.34    0.48
   1   3   0    1.68    0.28
   1   3   0    1.24    0.28
   0  -3  -1  127.00    4.40
   0   3   1  127.98    4.41
   0   3   1  124.67    4.39
   1  -3  -2   12.19    0.73
  -1   3   2   10.17    0.67
   2  -3  -3    1.45    0.55
  -2   3   3    0.66    0.44
   3  -3  -4   -0.89    0.54
  -3   3   4   -0.04    0.45
   4  -3  -5   27.20    1.43
  -4   3   5   26.02    1.31
   5  -3  -6   15.06    1.18
  -5   3   6   15.10    1.03
   6  -3  -7    0.53    0.73
  -6   3   7    0.31    0.57
   7  -3  -8    3.68    0.94
  -7   3   8    4.81    0.74
   8  -3  -9    1.64    0.99
  -8   3   9    0.84    0.62
   9  -3 -10    5.56    1.14
  -9   3  10    4.69    0.82
  10  -3 -11    1.47    1.06
  11  -3 -12    0.56    1.11
 -11   3  12   -0.56    1.03
  12  -3 -13    0.52    1.27
 -12   3  13   -0.21    1.12
  13  -3 -14    0.53    1.30
 -13   3  14    0.29    1.26
 -13  -2  11   -0.39    1.26
  13   2 -11    0.55    0.97
 -12  -2  10    0.98    1.19
  12   2 -10    1.81    0.97
 -11  -2   9    2.72    1.18
  11   2  -9    1.52    0.90
 -10  -2   8   -0.13    0.88
  10   2  -8    0.29    0.79
  -9  -2   7    0.95    0.97
   9   2  -7    0.59    0.73
  -8  -2   6    9.92    1.22
   8   2  -6    9.74    0.79
   8   2  -6    9.08    0.89
  -7  -2   5    4.45    0.87
   7   2  -5    6.82    0.70
   7   2  -5    5.36    0.58
  -6  -2   4    2.87    0.71
   6   2  -4    2.59    0.50
   6   2  -4    3.20    0.42
  -5  -2   3    2.89    0.70
   5   2  -3    3.83    0.42
   5   2  -3    3.80    0.37
  -4  -2   2   31.19    1.47
   4   2  -2   28.45    1.08
   4   2  -2   28.40    1.08
  -3  -2   1    0.48    0.52
  -2  -2   0   72.17    2.77
   2   2   0   72.36    2.79
  -1  -2  -1  505.00   16.93
  -1  -2  -1  507.54   17.85
   1   2   1  509.20   17.86
   1   2   1  477.18   17.00
   1   2   1  493.88   16.86
   0  -2  -2   63.93    2.30
   0   2   2   63.55    2.30
   0   2   2   63.91    2.29
   1  -2  -3  205.92    7.12
  -1   2   3  205.22    7.10
   2  -2  -4    2.28    0.58
  -2   2   4    3.02    0.47
   3  -2  -5   22.25    1.25
  -3   2   5   23.02    1.17
   4  -2  -6    8.45    0.79
  -4   2   6    7.13    0.68
   5  -2  -7    2.97    0.74
  -5   2   7    3.14    0.59
   6  -2  -8    1.80    0.81
  -6   2   8    1.94    0.61
   7  -2  -9    6.58    1.05
  -7   2   9    6.23    0.81
   8  -2 -10    2.05    0.99
  -8   2  10    3.17    0.74
   9  -2 -11    3.27    1.11
  -9   2  11    3.67    0.75
  10  -2 -12    1.50    1.08
 -10   2  12   -0.51    0.95
  11  -2 -13   -0.15    1.18
 -11   2  13    1.31    1.07
  12  -2 -14    0.81    1.30
 -12   2  14   -0.24    1.14
  13  -2 -15   -0.53    1.38
 -13   2  15   -0.21    1.23
 -14  -1  11    1.68    1.41
  14   1 -11   -1.57    1.04
 -13  -1  10   -0.03    1.20
  13   1 -10   -1.54    0.96
 -12  -1   9   -0.22    1.12
  12   1  -9    0.94    0.91
 -11  -1   8    0.36    1.03
  11   1  -8   -0.78    0.81
 -10  -1   7    2.25    1.00
  10   1  -7    1.45    0.75
  -9  -1   6    1.45    0.87
   9   1  -6    1.88    0.77
  -8  -1   5    2.35    0.93
   8   1  -5    1.10    0.53
   8   1  -5    1.59    0.66
  -7  -1   4    8.10    0.97
   7   1  -4    8.51    0.74
   7   1  -4    8.40    0.66
  -6  -1   3   20.75    1.39
   6   1  -3   19.82    0.99
   6   1  -3   22.14    0.99
  -5  -1   2    4.52    0.66
   5   1  -2    5.40    0.44
   5   1  -2    5.06    0.40
  -4  -1   1   15.00    1.02
   4   1  -1   13.71    0.60
   4   1  -1   13.07    0.59
  -3  -1   0   27.76    1.35
  -2  -1  -1    1.01    0.43
   2   1   1    1.11    0.50
  -1  -1  -2  152.35    5.17
  -1  -1  -2  153.21    5.57
   1   1   2  153.16    5.57
   1   1   2  148.89    5.18
   1   1   2  148.94    5.19
   0  -1  -3  233.71    7.90
   0  -1  -3  227.39    8.37
   0   1   3  226.46    7.88
   0   1   3  232.77    7.90
   1  -1  -4   65.14    2.43
  -1   1   4   64.87    2.42
   2  -1  -5  130.92    4.71
  -2   1   5  131.43    4.66
   3  -1  -6   16.12    1.10
  -3   1   6   16.61    0.98
   4  -1  -7    0.19    0.62
  -4   1   7   -0.54    0.43
   5  -1  -8   11.50    1.04
  -5   1   8   10.59    0.90
   6  -1  -9   -0.88    0.73
  -6   1   9    0.92    0.58
   7  -1 -10   22.38    1.64
  -7   1  10   20.95    1.30
   8  -1 -11    6.27    1.15
  -8   1  11    5.89    0.85
   9  -1 -12    0.48    0.98
  -9   1  12   -0.74    0.82
  -9   1  12    0.47    0.62
  10  -1 -13   -0.63    1.06
 -10   1  13   -0.08    0.90
  11  -1 -14    3.84    1.27
 -11   1  14    1.17    1.17
  12  -1 -15    1.74    1.36
 -12   1  15   -0.05    1.19
 -14   0  10   -1.61    1.23
  14   0 -10   -0.10    1.12
 -13   0   9   -1.51    0.99
  13   0  -9    0.28    0.94
 -12   0   8   -0.74    1.04
  12   0  -8    0.59    0.91
 -11   0   7    0.44    1.00
  11   0  -7    0.52    0.79
 -10   0   6    0.19    0.91
  10   0  -6    0.73    0.78
  -9   0   5    3.61    1.03
   9   0  -5    4.05    0.80
  -8   0   4   -0.19    0.80
   8   0  -4    0.12    0.50
   8   0  -4    0.95    0.63
  -7   0   3    0.61    0.72
   7   0  -3   -0.56    0.40
   7   0  -3   -0.15    0.51
  -6   0   2    3.94    0.73
   6   0  -2    3.85    0.51
   6   0  -2    4.81    0.47
  -5   0   1    2.33    0.57
   5   0  -1    1.73    0.37
   5   0  -1    2.48    0.35
  -4   0   0    2.79    0.53
   4   0   0    3.03    0.32
   4   0   0    2.74    0.35
  -3   0  -1    1.14    0.47
   3   0   1    0.33    0.25
   3   0   1    0.67    0.25
  -2   0  -2   66.51    2.52
   2   0   2   69.84    2.38
   2   0   2   65.58    2.38
  -1   0  -3   -0.19    0.33
  -1   0  -3   -0.13    0.42
   1   0   3    0.17    0.28
   1   0   3    0.15    0.32
   1   0   3    0.77    0.50
   0   0  -4   -0.38    0.41
   0   0  -4   -0.16    0.45
   0   0   4    0.03    0.42
   0   0   4    0.56    0.53
   0   0   4   -0.05    0.32
   1   0  -5   16.10    1.00
  -1   0   5   15.31    0.89
   2   0  -6   15.28    1.03
  -2   0   6   13.66    0.93
   3   0  -7   13.63    0.98
  -3   0   7   14.80    0.95
   4   0  -8    4.20    0.78
  -4   0   8    5.48    0.67
   5   0  -9   -0.21    0.71
  -5   0   9    0.73    0.52
   6   0 -10   -0.20    0.81
  -6   0  10   -0.39    0.57
   7   0 -11    9.51    1.24
  -7   0  11   10.54    0.99
   8   0 -12    7.73    1.25
  -8   0  12    6.30    0.88
  -8   0  12    5.50    0.83
   9   0 -13    0.32    1.00
  -9   0  13    0.81    1.00
  10   0 -14    0.47    1.14
 -10   0  14   -0.57    0.98
  11   0 -15    1.39    1.26
 -11   0  15   -0.29    1.15
  12   0 -16    1.17    1.39
 -12   0  16   -0.98    1.15
 -14   1   9    1.42    1.30
  14  -1  -9    1.07    1.07
 -13   1   8    0.23    1.12
  13  -1  -8    0.26    0.93
 -12   1   7    2.62    1.11
  12  -1  -7    3.58    0.99
 -11   1   6    1.60    1.01
  11  -1  -6    0.13    0.85
 -10   1   5    4.22    1.05
  10  -1  -5    4.63    0.85
  -9   1   4    5.70    1.02
   9  -1  -4    3.61    0.78
  -8   1   3    5.75    0.96
   8  -1  -3    6.15    0.79
   8  -1  -3    6.36    0.73
  -7   1   2    1.49    0.68
   7  -1  -2    0.84    0.48
   7  -1  -2    1.57    0.55
  -6   1   1   20.68    1.28
   6  -1  -1   20.97    1.03
   6  -1  -1   20.13    1.04
  -5   1   0   13.11    0.95
  -5   1   0   13.89    0.60
   5  -1   0   13.46    0.77
   5  -1   0   13.71    0.77
  -4   1  -1    0.32    0.43
  -4   1  -1    0.07    0.21
   4  -1   1   -0.24    0.34
   4  -1   1    0.55    0.33
  -3   1  -2  178.62    6.38
   3  -1   2  176.54    6.18
   3  -1   2  182.34    6.18
  -2   1  -3    3.09    0.41
   2  -1   3    3.91    0.45
   2  -1   3    3.48    0.38
  -1   1  -4   36.65    1.48
   1  -1   4   34.18    1.64
   1  -1   4   36.75    1.50
   1  -1   4   36.89    1.46
   1  -1   4   36.92    1.45
   0   1  -5   36.04    1.72
   0   1  -5   37.46    1.57
   0  -1   5   36.67    1.72
   0  -1   5   36.11    1.52
   1   1  -6   60.80    2.37
   1   1  -6   60.13    2.53
  -1  -1   6   62.24    2.36
   2   1  -7    6.56    0.72
  -2  -1   7    7.13    0.67
   3   1  -8   21.76    1.32
  -3  -1   8   23.71    1.23
   4   1  -9   -0.56    0.65
  -4  -1   9   -0.47    0.49
   5   1 -10    4.25    0.90
  -5  -1  10    5.00    0.74
   6   1 -11   -0.18    0.85
  -6  -1  11    0.47    0.66
  -6  -1  11   -0.54    0.55
   7   1 -12    0.48    0.96
  -7  -1  12   -0.10    0.62
  -7  -1  12   -1.11    0.55
   8   1 -13    3.32    1.08
  -8  -1  13    2.19    0.93
  -8  -1  13    2.96    0.72
  -8  -1  13    2.54    0.74
   9   1 -14   -0.39    1.04
  -9  -1  14    0.80    1.04
  10   1 -15   -0.55    1.11
 -10  -1  15    0.26    1.12
  11   1 -16   -0.31    1.18
 -11  -1  16   -0.14    1.14
  12   1 -17    0.92    1.39
 -12  -1  17    2.02    1.26
 -14   2   8   -1.49    1.10
  14  -2  -8    1.19    1.06
 -13   2   7   -0.21    1.07
  13  -2  -7    2.54    1.00
 -12   2   6    1.10    1.07
  12  -2  -6    1.29    0.97
 -11   2   5    1.72    0.96
  11  -2  -5   -0.12    0.77
 -10   2   4    0.04    0.86
  10  -2  -4    1.50    0.82
  -9   2   3   -0.30    0.76
   9  -2  -3    0.78    0.71
  -8   2   2    7.23    0.58
  -8   2   2    6.80    0.94
   8  -2  -2    8.26    0.88
   8  -2  -2    7.61    0.77
  -7   2   1    2.64    0.35
  -7   2   1    2.68    0.68
   7  -2  -1    3.71    0.56
   7  -2  -1    2.18    0.58
  -6   2   0   -0.02    0.49
  -6   2   0   -0.23    0.27
   6  -2   0    0.47    0.47
   6  -2   0    0.30    0.41
  -5   2  -1   22.58    1.14
   5  -2   1   22.09    1.06
   5  -2   1   20.34    1.08
  -4   2  -2    9.48    0.68
   4  -2   2    9.33    0.73
   4  -2   2    9.94    0.75
  -3   2  -3   38.34    1.53
  -3   2  -3   38.78    1.51
   3  -2   3   37.27    1.54
   3  -2   3   37.12    1.54
  -2   2  -4   12.92    0.88
   2  -2   4   14.95    0.96
   2  -2   4   14.15    0.70
   2  -2   4   13.66    0.81
  -1   2  -5    0.28    0.51
   1  -2   5    0.11    0.61
   1  -2   5   -0.37    0.35
   0   2  -6   34.50    1.60
   0   2  -6   36.90    1.75
   0  -2   6   35.79    1.54
   0  -2   6   35.89    1.73
   1   2  -7   14.06    1.19
   1   2  -7   15.53    1.08
  -1  -2   7   17.23    1.01
  -1  -2   7   15.39    1.00
   2   2  -8    0.45    0.61
   2   2  -8    1.55    0.61
  -2  -2   8    0.79    0.50
  -2  -2   8   -0.14    0.47
   3   2  -9   -0.52    0.58
  -3  -2   9    0.02    0.50
  -3  -2   9    0.75    0.53
   4   2 -10    2.27    0.73
  -4  -2  10    3.53    0.65
  -4  -2  10    2.46    0.63
   5   2 -11   -0.77    0.82
  -5  -2  11   -0.01    0.60
  -5  -2  11    0.21    0.58
   6   2 -12    0.45    0.94
  -6  -2  12    1.21    0.67
   7   2 -13    8.08    1.26
  -7  -2  13    6.74    1.16
  -7  -2  13    7.98    0.95
   8   2 -14    0.27    1.03
  -8  -2  14   -0.67    0.94
  -8  -2  14    0.62    0.67
   9   2 -15   -0.72    1.06
  -9  -2  15    0.59    1.04
  10   2 -16   -0.10    1.24
 -10  -2  16   -0.25    0.97
  11   2 -17    0.80    1.34
 -11  -2  17    0.94    1.21
  12   2 -18   -1.29    1.39
 -12  -2  18    0.51    1.31
 -14   3   7    0.16    1.14
  14  -3  -7    0.66    1.04
 -13   3   6    0.75    1.04
  13  -3  -6    0.88    1.04
 -12   3   5    0.71    0.97
  12  -3  -5    1.03    0.96
 -11   3   4    0.35    0.86
  11  -3  -4   -0.83    0.84
 -10   3   3    6.85    1.07
  10  -3  -3    5.80    0.94
  -9   3   2   13.05    1.19
   9  -3  -2   11.50    1.09
  -8   3   1   -0.95    0.64
  -8   3   1   -0.31    0.33
   8  -3  -1   -0.13    0.68
  -7   3   0    0.35    0.60
  -7   3   0    0.00    0.12
   7  -3   0   -0.51    0.54
   7  -3   0   -0.32    0.51
  -6   3  -1    4.03    0.61
   6  -3   1    5.29    0.61
   6  -3   1    4.23    0.64
  -5   3  -2    1.95    0.39
  -5   3  -2    2.24    0.46
   5  -3   2    2.29    0.52
   5  -3   2    1.73    0.50
  -4   3  -3    1.60    0.38
  -4   3  -3    1.60    0.38
   4  -3   3    1.46    0.49
   4  -3   3    1.79    0.45
  -3   3  -4    6.33    0.43
  -3   3  -4    6.32    0.60
   3  -3   4    6.26    0.47
   3  -3   4    6.24    0.62
  -2   3  -5   37.85    1.66
   2  -3   5   36.87    1.59
   2  -3   5   38.99    1.40
  -1   3  -6    1.90    0.56
   1  -3   6    1.74    0.67
   1  -3   6    1.65    0.47
   0   3  -7    9.30    0.84
   0   3  -7   12.34    1.07
   0  -3   7    8.50    0.84
   0  -3   7    9.01    0.76
   1   3  -8    0.19    0.61
   1   3  -8    0.80    0.57
  -1  -3   8    0.43    0.45
   2   3  -9   10.22    0.93
   2   3  -9    9.58    0.86
  -2  -3   9    9.97    0.84
   3   3 -10    3.79    0.81
   3   3 -10    4.81    0.74
  -3  -3  10    4.31    0.70
   4   3 -11    0.04    0.78
  -4  -3  11   -0.10    0.58
   5   3 -12    2.64    0.97
  -5  -3  12    2.99    0.82
  -5  -3  12    1.99    0.74
   6   3 -13    1.94    1.01
  -6  -3  13    1.34    0.70
  -6  -3  13    2.19    0.96
   7   3 -14   11.96    1.41
  -7  -3  14   13.00    1.43
  -7  -3  14   13.66    1.15
   8   3 -15    0.78    1.07
  -8  -3  15    2.74    1.10
   9   3 -16   -0.58    1.18
  -9  -3  16    0.29    0.96
  10   3 -17    0.33    1.21
 -10  -3  17    1.23    1.17
  11   3 -18    0.73    1.36
 -11  -3  18    1.34    1.18
 -14   4   6    0.84    1.21
  14  -4  -6   -1.56    1.03
 -13   4   5   -0.49    0.97
  13  -4  -5    0.82    1.02
 -12   4   4    0.41    0.96
  12  -4  -4    1.29    0.95
 -11   4   3   -0.46    0.80
  11  -4  -3    0.90    0.82
 -10   4   2    3.59    0.87
  10  -4  -2    3.75    0.90
  -9   4   1   -0.51    0.73
   9  -4  -1    0.20    0.75
  -8   4   0    7.65    0.89
   8  -4   0    6.37    0.87
  -7   4  -1    0.07    0.55
  -7   4  -1    0.30    0.41
   7  -4   1   -0.31    0.59
  -6   4  -2   14.17    1.02
  -6   4  -2   14.91    0.92
   6  -4   2   15.70    1.05
  -5   4  -3   11.33    0.79
  -5   4  -3   10.56    0.76
   5  -4   3   11.33    0.87
  -4   4  -4   37.74    1.51
  -4   4  -4   37.49    1.61
   4  -4   4   39.86    1.70
  -3   4  -5    2.14    0.53
   3  -4   5    1.60    0.51
  -2   4  -6   25.07    1.32
   2  -4   6   26.91    1.31
  -1   4  -7    1.12    0.62
   1  -4   7    0.25    0.46
   1  -4   7    1.08    0.67
   0   4  -8   15.41    1.17
   0  -4   8   17.09    1.12
   0  -4   8   15.71    1.05
   1   4  -9    1.56    0.63
   1   4  -9    0.84    0.61
  -1  -4   9    0.65    0.50
   2   4 -10    3.86    0.80
   2   4 -10    3.99    0.72
  -2  -4  10    2.84    0.60
   3   4 -11   62.48    2.70
   3   4 -11   60.16    2.60
  -3  -4  11   61.91    2.63
  -3  -4  11   61.07    2.55
   4   4 -12    1.37    0.90
   4   4 -12    2.25    0.79
  -4  -4  12    0.89    0.65
  -4  -4  12    0.66    0.74
   5   4 -13    0.12    0.94
   5   4 -13   -0.03    0.81
  -5  -4  13    0.29    0.83
  -5  -4  13   -0.21    0.63
   6   4 -14   -0.07    1.01
  -6  -4  14    0.35    0.68
  -6  -4  14    0.20    0.88
   7   4 -15    0.22    1.03
  -7  -4  15    2.28    0.72
  -7  -4  15    1.63    0.92
   8   4 -16    1.58    1.10
  -8  -4  16   -0.55    0.90
   9   4 -17    1.05    1.19
  -9  -4  17    1.09    1.00
  10   4 -18   -1.11    1.29
 -10  -4  18   -0.48    1.11
  11   4 -19   -0.04    1.39
 -11  -4  19   -0.80    1.22
 -14   5   5    0.34    1.11
  14  -5  -5    0.02    1.06
 -13   5   4   -1.41    0.90
  13  -5  -4    0.10    1.01
 -12   5   3   -0.01    0.88
  12  -5  -3    1.40    0.93
 -11   5   2   -0.49    0.81
  11  -5  -2    0.30    0.87
 -10   5   1   -0.53    0.69
  10  -5  -1    0.07    0.82
  -9   5   0    8.39    0.97
   9  -5   0    7.16    1.02
  -8   5  -1    5.98    0.64
  -8   5  -1    3.77    0.75
   8  -5   1    5.08    0.88
  -7   5  -2    1.05    0.58
  -7   5  -2    1.25    0.51
   7  -5   2    1.63    0.71
  -6   5  -3    2.29    0.51
  -6   5  -3    2.21    0.48
   6  -5   3    1.97    0.66
  -5   5  -4   63.68    2.47
  -5   5  -4   62.78    2.40
   5  -5   4   63.76    2.57
  -4   5  -5   54.65    1.97
  -4   5  -5   54.36    2.20
   4  -5   5   51.78    2.22
  -3   5  -6    0.78    0.55
   3  -5   6    1.04    0.55
  -2   5  -7    1.19    0.54
   2  -5   7    0.98    0.56
  -1   5  -8    5.52    0.76
   1  -5   8    6.31    0.51
   1  -5   8    7.69    0.81
   1  -5   8    5.95    0.79
   0   5  -9    7.31    0.82
   0  -5   9    7.26    0.79
   0  -5   9    7.18    0.58
   0  -5   9    5.76    0.78
   1   5 -10   -1.04    0.68
  -1  -5  10    0.55    0.64
  -1  -5  10    0.99    0.59
  -1  -5  10    0.54    0.50
   2   5 -11    9.64    0.96
   2   5 -11    9.57    1.05
  -2  -5  11   10.05    0.90
  -2  -5  11   10.70    0.96
   3   5 -12    2.14    0.90
   3   5 -12    1.95    0.76
  -3  -5  12    2.83    0.73
  -3  -5  12    1.00    0.69
   4   5 -13    0.23    0.93
   4   5 -13    1.53    0.79
  -4  -5  13   -0.05    0.76
  -4  -5  13   -0.42    0.66
   5   5 -14    1.25    0.87
   5   5 -14    0.82    0.98
  -5  -5  14    0.28    0.86
  -5  -5  14    2.43    0.75
   6   5 -15   -0.84    0.80
   6   5 -15    1.58    1.05
  -6  -5  15    1.02    0.75
  -6  -5  15   -0.51    0.88
   7   5 -16    1.07    1.05
  -7  -5  16    0.09    0.84
   8   5 -17    1.46    1.16
  -8  -5  17    0.01    1.00
   9   5 -18    2.05    1.31
  -9  -5  18    0.11    1.11
  10   5 -19   -0.76    1.34
 -10  -5  19    0.71    1.10
 -14   6   4    0.77    1.00
  14  -6  -4    0.96    1.13
 -13   6   3   -0.41    0.98
  13  -6  -3    0.93    1.03
 -12   6   2    0.15    0.89
  12  -6  -2    0.37    0.96
 -11   6   1    1.23    0.82
  11  -6  -1    1.87    0.91
 -10   6   0    1.73    0.76
  10  -6   0    2.02    0.89
  -9   6  -1    2.33    0.74
   9  -6   1    2.34    0.87
  -8   6  -2    0.01    0.61
  -8   6  -2   -0.55    0.51
   8  -6   2    0.21    0.77
  -7   6  -3   -0.36    0.50
  -7   6  -3   -0.06    0.50
   7  -6   3   -0.66    0.66
  -6   6  -4    3.95    0.60
  -6   6  -4    3.15    0.50
   6  -6   4    4.13    0.80
  -5   6  -5    0.64    0.34
  -5   6  -5    1.25    0.54
   5  -6   5    1.30    0.65
  -4   6  -6    0.96    0.59
   4  -6   6   -0.51    0.55
  -3   6  -7    6.33    0.77
   3  -6   7    5.75    0.76
  -2   6  -8    5.86    0.79
   2  -6   8    5.41    0.76
  -1   6  -9   28.23    1.61
   1  -6   9   28.62    1.47
   1  -6   9   28.08    1.65
   1  -6   9   29.45    1.20
   0   6 -10    2.56    0.76
   0  -6  10    5.06    0.78
   0  -6  10    3.51    0.76
   0  -6  10    4.00    0.51
   1   6 -11   28.32    1.57
  -1  -6  11   27.66    1.49
  -1  -6  11   26.05    1.39
  -1  -6  11   24.26    1.53
   2   6 -12    2.35    0.83
  -2  -6  12    0.76    0.69
  -2  -6  12    1.13    0.63
   3   6 -13    1.46    0.77
   3   6 -13    1.43    0.97
  -3  -6  13    1.35    0.75
  -3  -6  13    1.01    0.72
   4   6 -14    3.75    1.10
   4   6 -14    5.04    0.92
  -4  -6  14    4.08    0.93
  -4  -6  14    3.99    0.85
   5   6 -15   -0.18    0.82
   5   6 -15    0.12    1.04
  -5  -6  15    0.17    0.85
  -5  -6  15    0.04    0.72
   6   6 -16    0.10    0.82
   6   6 -16   -0.22    1.02
  -6  -6  16    0.88    0.70
  -6  -6  16   -0.34    0.84
   7   6 -17    0.21    1.10
  -7  -6  17   -0.49    0.94
   8   6 -18    1.49    1.18
  -8  -6  18   -0.61    0.99
   9   6 -19    1.20    1.31
  -9  -6  19    1.08    1.15
  10   6 -20    0.18    1.28
 -10  -6  20    0.23    1.24
 -14   7   3    1.05    1.03
  14  -7  -3   -0.47    1.15
 -13   7   2    1.29    1.00
  13  -7  -2    1.93    1.05
 -12   7   1    3.48    0.98
  12  -7  -1    2.57    1.08
 -11   7   0    0.27    0.76
  11  -7   0   -0.65    0.87
 -10   7  -1    1.24    0.69
  10  -7   1   -0.02    0.82
  -9   7  -2    2.95    0.64
  -9   7  -2    1.57    0.66
   9  -7   2    3.01    0.97
  -8   7  -3    1.54    0.59
  -8   7  -3    0.79    0.58
   8  -7   3    0.45    0.79
  -7   7  -4    0.55    0.60
  -7   7  -4    1.08    0.50
   7  -7   4    0.76    0.77
  -6   7  -5    0.76    0.63
  -6   7  -5    1.61    0.42
   6  -7   5    2.95    0.78
  -5   7  -6    1.69    0.29
  -5   7  -6    1.59    0.64
   5  -7   6    1.67    0.73
  -4   7  -7    0.49    0.64
   4  -7   7    0.73    0.66
  -3   7  -8    4.65    0.80
   3  -7   8    4.22    0.72
  -2   7  -9    0.98    0.71
   2  -7   9    1.05    0.61
  -1   7 -10    1.44    0.79
   1  -7  10    2.90    0.74
   1  -7  10    2.40    0.42
   1  -7  10    1.56    0.77
   0   7 -11    1.77    0.87
   0  -7  11    1.76    0.51
   0  -7  11    1.58    0.73
   0  -7  11    1.31    0.66
   1   7 -12    1.52    0.90
  -1  -7  12    1.28    0.60
  -1  -7  12    1.63    0.74
  -1  -7  12    1.19    0.69
   2   7 -13    1.65    0.98
  -2  -7  13    0.58    0.75
  -2  -7  13    0.50    0.62
   3   7 -14   39.16    2.24
  -3  -7  14   39.08    2.01
  -3  -7  14   40.52    2.03
   4   7 -15   -0.11    1.02
   4   7 -15    1.23    0.80
  -4  -7  15   -0.29    0.77
  -4  -7  15    1.01    0.79
   5   7 -16   -0.55    0.77
   5   7 -16    0.14    1.04
  -5  -7  16    0.19    0.85
  -5  -7  16    0.57    0.72
   6   7 -17    2.49    1.13
  -6  -7  17    0.04    0.90
  -6  -7  17   -0.35    0.73
   7   7 -18   -0.32    1.11
  -7  -7  18    0.53    0.99
   8   7 -19    0.43    1.21
  -8  -7  19   -0.26    1.03
   9   7 -20   -1.75    1.22
  -9  -7  20    0.22    1.20
 -10  -7  21    0.55    1.26
 -14   8   2   -0.70    0.95
  14  -8  -2    0.92    1.16
 -13   8   1    0.30    0.89
  13  -8  -1    0.21    1.09
 -12   8   0    0.71    0.84
  12  -8   0    0.28    0.98
 -11   8  -1    0.05    0.69
  11  -8   1   -0.82    0.88
 -10   8  -2    0.65    0.64
  10  -8   2    0.07    0.86
  -9   8  -3    1.21    0.66
  -9   8  -3    2.06    0.64
   9  -8   3    1.12    0.88
  -8   8  -4    0.13    0.52
  -8   8  -4    1.70    0.65
   8  -8   4    0.35    0.81
  -7   8  -5    0.69    0.47
  -7   8  -5    0.23    0.59
   7  -8   5   -0.21    0.78
  -6   8  -6   -0.12    0.35
  -6   8  -6   -0.34    0.64
   6  -8   6    0.55    0.77
  -5   8  -7    0.46    0.69
   5  -8   7    0.97    0.70
  -4   8  -8    0.16    0.69
   4  -8   8    0.41    0.72
  -3   8  -9    6.09    0.95
   3  -8   9    6.46    0.93
  -2   8 -10    0.56    0.72
   2  -8  10    0.74    0.70
  -1   8 -11    1.52    0.87
   1  -8  11    0.53    0.72
   1  -8  11    0.87    0.44
   1  -8  11    1.79    0.82
   0   8 -12    3.01    0.94
   0  -8  12    3.13    0.85
   0  -8  12    2.05    0.59
   0  -8  12    1.88    0.81
   1   8 -13    0.94    0.99
  -1  -8  13    1.27    0.80
  -1  -8  13    1.14    0.62
  -1  -8  13    0.01    0.75
   2   8 -14   30.56    1.96
  -2  -8  14   27.08    1.61
  -2  -8  14   28.70    1.70
   3   8 -15    0.50    1.04
  -3  -8  15    0.24    0.75
  -3  -8  15    1.06    0.78
   4   8 -16    1.07    0.97
  -4  -8  16    2.51    0.83
  -4  -8  16    2.21    0.87
   5   8 -17    1.76    1.12
  -5  -8  17    2.76    0.87
  -5  -8  17    1.72    0.90
   6   8 -18   -1.07    1.12
  -6  -8  18    0.12    0.93
   7   8 -19    0.24    1.19
  -7  -8  19    0.73    1.03
   8   8 -20   -0.19    1.26
  -8  -8  20   -1.38    1.03
   9   8 -21    0.88    1.45
  -9  -8  21   -0.02    1.14
 -14   9   1    1.26    0.95
  14  -9  -1    1.97    1.18
 -13   9   0    2.12    0.90
  13  -9   0   -1.33    1.04
 -12   9  -1   -0.93    0.71
  12  -9   1    0.51    1.10
 -11   9  -2    0.55    0.71
  11  -9   2   -1.30    0.89
 -10   9  -3    2.62    0.69
  10  -9   3    2.21    1.03
  -9   9  -4   -1.17    0.58
  -9   9  -4    0.03    0.54
   9  -9   4   -0.78    0.89
  -8   9  -5   -0.13    0.64
  -8   9  -5    0.08    0.50
   8  -9   5    0.05    0.84
  -7   9  -6    2.31    0.76
  -7   9  -6    0.48    0.41
   7  -9   6    1.44    0.90
  -6   9  -7    0.79    0.70
   6  -9   7    0.37    0.81
  -5   9  -8    2.99    0.86
   5  -9   8    1.99    0.80
  -4   9  -9    0.81    0.74
   4  -9   9    1.22    0.75
  -3   9 -10    5.24    1.00
   3  -9  10    6.17    0.92
  -2   9 -11    1.03    0.90
   2  -9  11    1.13    0.80
  -1   9 -12   -0.15    0.84
   1  -9  12    0.54    0.85
   1  -9  12    0.11    0.48
   1  -9  12    0.34    0.78
   0   9 -13    1.45    1.05
   0  -9  13    2.77    0.84
   0  -9  13    1.72    0.85
   0  -9  13    1.87    0.63
   1   9 -14    4.75    1.19
  -1  -9  14    4.58    0.80
  -1  -9  14    6.86    1.02
  -1  -9  14    3.98    0.93
   2   9 -15    1.48    1.07
  -2  -9  15    0.74    0.83
  -2  -9  15   -0.08    0.68
   3   9 -16    2.77    1.15
  -3  -9  16    2.96    0.82
  -3  -9  16    2.10    0.87
   4   9 -17   -1.82    0.99
  -4  -9  17   -1.05    0.70
  -4  -9  17   -0.15    0.75
   5   9 -18    0.61    1.11
  -5  -9  18   -0.69    0.84
  -5  -9  18    0.94    0.79
   6   9 -19    5.00    1.31
  -6  -9  19    2.86    1.06
   7   9 -20   -0.16    1.20
  -7  -9  20   -0.37    0.97
   8   9 -21   -0.52    1.28
  -8  -9  21    0.59    1.13
  14 -10   0    0.97    1.28
  13 -10   1   -0.77    1.05
  12 -10   2   -0.61    1.01
 -11  10  -3    0.38    0.66
  11 -10   3    2.41    1.11
 -10  10  -4   -0.25    0.58
  10 -10   4    0.67    0.97
  -9  10  -5    6.00    0.89
  -9  10  -5    6.41    0.71
   9 -10   5    6.14    1.15
  -8  10  -6    1.73    0.71
  -8  10  -6    0.95    0.47
   8 -10   6    1.08    0.94
  -7  10  -7   -0.40    0.76
  -7  10  -7    0.34    0.36
   7 -10   7   -0.50    0.89
  -6  10  -8    0.45    0.76
   6 -10   8    0.62    0.90
  -5  10  -9   22.34    1.67
   5 -10   9   24.09    1.72
  -4  10 -10    1.46    0.93
   4 -10  10    1.16    0.92
  -3  10 -11    0.46    0.94
   3 -10  11   -0.04    0.87
  -2  10 -12    1.39    0.97
   2 -10  12    0.91    0.86
  -1  10 -13    1.18    1.01
   1 -10  13   -0.27    0.86
   1 -10  13    1.03    0.85
   1 -10  13    0.03    0.53
   0  10 -14    0.60    0.98
   0 -10  14    1.66    0.90
   0 -10  14    2.25    0.84
   0 -10  14    1.52    0.66
   1  10 -15   10.93    1.45
  -1 -10  15   10.94    0.99
  -1 -10  15    9.68    1.19
  -1 -10  15   10.20    1.12
   2  10 -16    1.79    1.14
  -2 -10  16    1.83    0.83
  -2 -10  16    1.22    0.73
   3  10 -17    1.45    1.02
  -3 -10  17    0.80    0.79
  -3 -10  17    0.38    0.78
   4  10 -18    0.10    1.11
  -4 -10  18   -0.01    0.77
  -4 -10  18    0.50    0.88
   5  10 -19    3.59    1.28
  -5 -10  19    3.44    1.02
   6  10 -20    0.80    1.25
  -6 -10  20    0.56    1.00
   7  10 -21    0.74    1.33
  -7 -10  21    0.90    1.07
   8  10 -22   -0.50    1.33
  -8 -10  22   -0.77    1.16
  14 -11   1   -1.31    1.25
  13 -11   2    0.02    1.16
  12 -11   3    0.83    1.17
  11 -11   4    6.09    1.29
  10 -11   5    0.20    1.05
   9 -11   6    2.64    1.06
  -8  11  -7    0.64    0.70
   8 -11   7   -0.22    0.93
  -7  11  -8   11.21    1.15
   7 -11   8   11.19    1.33
  -6  11  -9    6.83    1.07
   6 -11   9    8.11    1.15
  -5  11 -10   -0.11    0.88
   5 -11  10    1.20    0.88
  -4  11 -11   14.95    1.44
   4 -11  11   12.86    1.33
  -3  11 -12    4.82    1.15
   3 -11  12    3.86    0.96
  -2  11 -13    1.23    1.06
   2 -11  13    1.70    0.94
   2 -11  13    2.16    1.01
  -1  11 -14   -1.02    0.99
   1 -11  14    0.24    0.89
   1 -11  14   -0.42    0.87
   1 -11  14   -1.12    0.55
   0  11 -15    0.48    1.07
   0 -11  15    2.11    0.83
   0 -11  15    1.61    0.89
   0 -11  15    0.43    0.59
   1  11 -16   -0.84    1.06
  -1 -11  16   -0.93    0.78
  -1 -11  16   -0.13    0.67
  -1 -11  16    0.29    0.80
   2  11 -17   -0.31    1.11
  -2 -11  17   -0.36    0.71
  -2 -11  17    0.60    0.81
   3  11 -18    1.69    1.09
  -3 -11  18    0.17    0.80
  -3 -11  18    0.17    0.84
   4  11 -19    2.78    1.15
  -4 -11  19    2.69    0.90
  -4 -11  19    1.60    0.89
   5  11 -20    0.02    1.20
  -5 -11  20   -0.03    0.97
   6  11 -21   -0.17    1.24
  -6 -11  21   -0.61    1.04
   7  11 -22    1.04    1.35
  -7 -11  22    0.27    1.16
  13 -12   3    0.51    1.31
  12 -12   4    1.93    1.25
  11 -12   5    0.26    1.15
  10 -12   6    1.35    1.16
   9 -12   7    0.16    1.01
  -8  12  -8   -0.67    0.74
   8 -12   8   -0.34    0.97
  -7  12  -9   -0.84    0.78
   7 -12   9    1.65    1.02
  -6  12 -10    1.37    0.91
   6 -12  10    2.28    0.96
  -5  12 -11    1.41    1.00
   5 -12  11   -0.35    0.84
  -4  12 -12    1.54    1.04
   4 -12  12    3.02    1.02
  -3  12 -13    0.44    1.02
   3 -12  13    0.03    0.91
  -2  12 -14    0.46    0.96
   2 -12  14    0.29    0.88
   2 -12  14   -0.84    0.91
  -1  12 -15    0.61    1.05
   1 -12  15    0.21    0.91
   1 -12  15    0.07    0.57
   1 -12  15    1.38    0.84
   0  12 -16    2.10    1.17
   0 -12  16    0.73    0.91
   0 -12  16    2.49    0.89
   0 -12  16    2.14    0.67
   1  12 -17   -0.37    1.09
  -1 -12  17    0.26    0.85
  -1 -12  17   -0.29    0.68
   2  12 -18    1.11    1.20
  -2 -12  18    0.54    0.84
  -2 -12  18    0.45    0.74
   3  12 -19    2.89    1.33
  -3 -12  19    0.41    0.84
  -3 -12  19   -0.07    0.86
   4  12 -20    1.76    1.29
  -4 -12  20   -0.21    0.93
   5  12 -21   -0.22    1.26
  -5 -12  21    1.92    1.07
   6  12 -22    1.77    1.41
  -6 -12  22   -0.84    1.02
  13 -13   4    1.86    1.38
  12 -13   5    0.84    1.21
  11 -13   6    2.16    1.22
  10 -13   7    0.56    1.10
   9 -13   8   -0.26    1.02
  -8  13  -9   -0.46    0.85
   8 -13   9   -0.69    1.01
  -7  13 -10    0.11    0.85
   7 -13  10   -0.66    0.95
  -6  13 -11    2.35    0.99
   6 -13  11    2.30    1.06
  -5  13 -12    0.87    0.92
   5 -13  12    1.07    0.89
  -4  13 -13    1.17    1.08
   4 -13  13    3.36    1.07
  -3  13 -14   -0.70    0.92
   3 -13  14   -0.20    0.95
  -2  13 -15    3.56    1.20
   2 -13  15    3.87    1.06
   2 -13  15    1.75    0.98
  -1  13 -16    2.53    1.17
   1 -13  16    3.24    1.03
   1 -13  16    2.25    0.99
   0  13 -17    0.38    1.14
   0 -13  17   -0.15    0.90
   0 -13  17   -0.96    0.88
   1  13 -18   -0.54    1.13
  -1 -13  18    0.33    0.89
  -1 -13  18   -0.36    0.72
   2  13 -19    1.27    1.28
  -2 -13  19    1.94    0.97
  -2 -13  19    2.00    0.85
   3  13 -20   -1.40    1.09
  -3 -13  20   -0.41    0.88
  -3 -13  20    2.17    1.00
   4  13 -21   -1.49    1.27
  -4 -13  21    0.45    0.93
   5  13 -22    0.50    1.41
  -5 -13  22    0.27    1.06
   6  13 -23    2.01    1.50
  -6 -13  23   -1.03    1.08
  13 -14   5   -0.65    1.23
  12 -14   6    0.66    1.27
  11 -14   7    1.87    1.26
  10 -14   8   -0.57    1.10
   9 -14   9    0.35    1.09
  -8  14 -10   -1.91    0.87
   8 -14  10   -0.60    1.07
  -7  14 -11    0.47    0.93
   7 -14  11   -0.87    0.97
  -6  14 -12   -0.81    1.01
   6 -14  12    0.74    1.02
  -5  14 -13    1.46    1.07
   5 -14  13   -0.20    0.97
  -4  14 -14   -1.14    1.05
   4 -14  14    0.94    0.99
  -3  14 -15    1.91    1.15
   3 -14  15    1.44    1.03
   3 -14  15    0.05    0.88
  -2  14 -16   -0.58    1.13
   2 -14  16    1.11    1.03
   2 -14  16    0.97    0.98
  -1  14 -17   -0.85    1.01
   1 -14  17   -0.80    0.92
   1 -14  17   -0.07    0.93
   0  14 -18    2.67    1.23
   0 -14  18    1.13    1.01
   1  14 -19   -0.40    1.23
  -1 -14  19    0.39    0.96
   2  14 -20   -0.14    1.24
  -2 -14  20    0.94    0.96
   3  14 -21    0.17    1.33
  -3 -14  21    0.05    0.84
   4  14 -22    3.44    1.48
  -4 -14  22    0.78    1.02
   5  14 -23   -1.46    1.41
  -5 -14  23   -1.07    1.03
  12 -15   7    1.02    1.41
  11 -15   8    0.76    1.27
  10 -15   9   -1.40    1.07
   9 -15  10   -1.22    1.05
  -8  15 -11   -0.13    0.91
   8 -15  11    0.60    1.16
  -7  15 -12   -0.56    0.93
   7 -15  12   -1.88    1.02
  -6  15 -13    0.25    1.04
   6 -15  13    1.07    1.10
  -5  15 -14   -1.13    1.04
   5 -15  14    0.41    1.07
  -4  15 -15   -0.17    1.14
   4 -15  15   -0.43    0.90
  -3  15 -16   -1.77    1.12
   3 -15  16    1.03    1.05
   3 -15  16    1.55    1.04
  -2  15 -17    1.14    1.26
   2 -15  17    0.73    0.97
   2 -15  17    0.25    1.02
  -1  15 -18    0.17    1.23
   1 -15  18    0.31    1.00
   0  15 -19    0.06    1.21
   0 -15  19    0.16    0.95
   1  15 -20    2.85    1.34
  -1 -15  20    0.90    0.98
   2  15 -21    1.28    1.33
   3  15 -22    2.41    1.41
   4  15 -23    2.38    1.53
  11 -16   9    0.11    1.26
  10 -16  10    0.25    1.22
   9 -16  11    1.06    1.24
  -8  16 -12   -0.47    0.93
   8 -16  12   -0.68    1.15
  -7  16 -13   -2.90    0.92
   7 -16  13   -1.38    1.05
  -6  16 -14   -1.34    1.03
   6 -16  14   -0.70    1.07
  -5  16 -15    0.96    1.18
   5 -16  15    0.62    1.00
  -4  16 -16    1.13    1.22
   4 -16  16    0.67    0.94
  -3  16 -17    1.93    1.26
   3 -16  17    1.76    1.12
   3 -16  17   -1.19    0.99
  -2  16 -18    0.12    1.23
   2 -16  18    2.25    1.01
  -1  16 -19    0.75    1.30
   1 -16  19    0.09    0.99
   0  16 -20    1.70    1.34
   0 -16  20    1.23    1.09
   1  16 -21    0.78    1.31
   2  16 -22    1.14    1.44
   3  16 -23   -2.35    1.32
  11 -17  10    0.28    1.33
  10 -17  11   -0.69    1.26
   9 -17  12    2.45    1.29
   8 -17  13   -0.67    1.18
  -7  17 -14   -1.16    1.03
   7 -17  14    0.20    1.20
  -6  17 -15    0.60    1.17
   6 -17  15    1.83    1.18
  -5  17 -16    1.60    1.27
   5 -17  16   -0.44    1.09
  -4  17 -17   -1.31    1.17
   4 -17  17    1.10    1.08
   4 -17  17   -0.04    0.96
  -3  17 -18   -0.84    1.22
   3 -17  18    0.71    1.06
  -2  17 -19   -0.91    1.27
   2 -17  19   -1.06    1.00
  -1  17 -20   -0.93    1.30
   1 -17  20   -0.43    0.98
   0  17 -21    0.16    1.41
   0 -17  21   -0.34    1.02
   1  17 -22    1.81    1.46
   9 -18  13   -0.15    1.28
   8 -18  14    0.03    1.09
  -7  18 -15    2.15    1.21
   7 -18  15   -0.64    1.18
  -6  18 -16   -0.29    1.28
   6 -18  16   -0.10    1.11
  -5  18 -17   -2.19    1.20
   5 -18  17   -1.64    1.07
  -4  18 -18   -0.36    1.28
   4 -18  18   -0.38    0.98
  -3  18 -19    0.21    1.32
   3 -18  19    0.74    1.15
  -2  18 -20    1.88    1.44
   2 -18  20    0.11    1.12
  -1  18 -21    1.09    1.47
   1 -18  21    0.59    1.07
   0  18 -22   -0.97    1.38
   8 -19  15   -0.62    1.25
  -7  19 -16    0.11    1.19
   7 -19  16   -0.19    1.24
  -6  19 -17    0.57    1.29
   6 -19  17   -0.25    1.21
  -5  19 -18    0.20    1.37
   5 -19  18    1.33    1.25
  -4  19 -19   -0.50    1.38
   4 -19  19   -1.15    1.10
  -3  19 -20   -0.77    1.38
   3 -19  20    2.72    1.25
  -1  22 -16    1.39    1.43
  -2  22 -15   -0.19    1.31
  -3  22 -14   -0.87    1.23
  -4  22 -13    0.83    1.25
   5 -22  12    1.18    1.20
  -5  22 -12   -1.43    1.15
   6 -22  11   -1.49    1.10
  -6  22 -11   -0.67    1.13
   7 -22  10   -1.47    1.11
  -7  22 -10   -1.53    1.07
   1  21 -17    4.87    1.57
   0  21 -16    0.41    1.36
  -1  21 -15   -0.22    1.30
  -2  21 -14    2.26    1.35
  -3  21 -13    0.57    1.24
   4 -21  12    1.72    1.14
  -4  21 -12    1.06    1.24
   5 -21  11   -0.29    1.10
  -5  21 -11    1.36    1.11
   6 -21  10    1.56    1.19
  -6  21 -10    2.72    1.28
   7 -21   9    0.75    1.22
  -7  21  -9   -2.74    0.99
   8 -21   8    2.61    1.35
  -8  21  -8   -1.23    1.03
   9 -21   7    1.60    1.37
  -9  21  -7   -1.71    1.06
   3  20 -18    0.70    1.36
   2  20 -17    1.17    1.35
   1  20 -16    1.06    1.35
   0  20 -15    1.27    1.25
  -1  20 -14    0.67    1.24
  -2  20 -13   -0.52    1.18
   3 -20  12   -0.71    0.99
  -3  20 -12   -0.18    1.11
   4 -20  11    1.02    1.03
  -4  20 -11    1.09    1.15
   5 -20  10    1.18    1.10
  -5  20 -10   -0.86    1.07
   6 -20   9   -1.02    1.06
  -6  20  -9    0.02    1.07
   7 -20   8    0.75    1.14
  -7  20  -8   -0.65    1.03
   8 -20   7    2.48    1.28
  -8  20  -7    0.34    1.09
   9 -20   6   -1.57    1.21
  -9  20  -6   -0.18    1.06
  10 -20   5   -0.35    1.31
 -10  20  -5    0.44    1.11
  -4 -19  18   -2.21    1.06
   4  19 -18   -0.63    1.28
  -3 -19  17   -1.92    1.11
   3  19 -17    1.84    1.33
   2  19 -16    1.71    1.28
   1  19 -15    1.09    1.24
   0  19 -14    2.76    1.24
  -1  19 -13   -0.68    1.16
   2 -19  12   -0.20    0.93
  -2  19 -12   -0.80    1.09
   3 -19  11    0.00    0.95
  -3  19 -11   -1.27    1.07
   4 -19  10    0.96    1.05
  -4  19 -10    0.20    1.05
   5 -19   9   -0.26    1.03
  -5  19  -9    0.44    1.07
   6 -19   8    1.30    1.15
  -6  19  -8    0.49    1.09
   7 -19   7    2.60    1.21
  -7  19  -7    1.46    1.04
   8 -19   6   -0.29    1.05
  -8  19  -6   -0.21    0.99
   9 -19   5    0.27    1.21
  -9  19  -5    0.15    1.00
  10 -19   4    1.69    1.41
 -10  19  -4    1.65    1.10
  -5 -18  18   -1.01    1.13
   5  18 -18   -2.71    1.20
  -4 -18  17    1.19    1.22
   4  18 -17   -2.74    1.12
  -3 -18  16    0.96    1.08
   3  18 -16    3.29    1.33
   2  18 -15    1.36    1.19
   1  18 -14   -0.57    1.08
   0  18 -13   -0.13    1.12
   1 -18  12    1.80    0.92
  -1  18 -12    0.22    1.13
   2 -18  11    0.31    0.88
  -2  18 -11    0.79    1.10
   3 -18  10   -0.44    0.90
  -3  18 -10    0.80    1.06
   4 -18   9    2.29    1.05
  -4  18  -9    0.13    1.02
   5 -18   8    1.06    1.06
  -5  18  -8    0.68    1.01
   6 -18   7    0.24    1.03
  -6  18  -7    0.11    0.88
   7 -18   6   -0.54    1.06
  -7  18  -6    0.42    0.98
   8 -18   5    1.30    1.20
  -8  18  -5    1.36    0.99
   9 -18   4    0.75    1.24
  -9  18  -4    0.70    0.98
  10 -18   3   -1.11    1.22
 -10  18  -3   -0.42    0.97
  11 -18   2    1.06    1.38
  -6 -17  18   -1.80    1.16
   6  17 -18   -1.67    1.19
  -5 -17  17    1.24    1.18
   5  17 -17    0.64    1.16
  -4 -17  16   -0.89    1.04
   4  17 -16    0.49    1.14
  -3 -17  15   -1.53    0.98
   3  17 -15   -0.73    1.08
  -2 -17  14   -0.29    1.02
   2  17 -14   -0.19    1.10
   1  17 -13   -0.22    1.07
   0 -17  12    0.74    0.83
   0  17 -12    1.82    1.13
   1 -17  11    0.94    0.87
  -1  17 -11   -0.47    1.03
   2 -17  10    0.42    0.86
  -2  17 -10    2.02    1.08
   3 -17   9    0.57    0.88
  -3  17  -9    0.41    1.02
   4 -17   8    0.90    0.94
  -4  17  -8    1.66    0.93
   5 -17   7   -0.65    0.95
  -5  17  -7    2.05    1.02
   6 -17   6    0.49    1.04
  -6  17  -6    1.45    0.97
   7 -17   5    2.16    1.08
  -7  17  -5    0.28    0.96
   8 -17   4    0.62    1.07
  -8  17  -4    0.54    0.95
   9 -17   3    0.09    1.17
  -9  17  -3    0.64    0.94
  10 -17   2    0.22    1.27
 -10  17  -2    0.55    0.97
  11 -17   1    0.61    1.18
  12 -17   0   -1.74    1.25
  -7 -16  18    1.54    1.40
   7  16 -18   -0.50    1.22
  -6 -16  17    0.96    1.20
   6  16 -17    0.21    1.18
  -5 -16  16    0.49    1.16
   5  16 -16   -0.31    1.14
  -4 -16  15   -1.57    0.98
   4  16 -15   -2.16    1.01
  -3 -16  14    0.37    1.00
   3  16 -14    0.63    1.04
  -2 -16  13    2.06    1.00
   2  16 -13    1.30    1.18
  -1 -16  12    1.76    0.79
   1  16 -12    1.23    1.03
   0 -16  11    1.32    0.79
   0  16 -11    0.37    1.03
   1 -16  10   -0.34    0.77
  -1  16 -10   -0.46    0.97
   2 -16   9    0.70    0.85
  -2  16  -9    0.58    0.99
   3 -16   8   -0.17    0.86
  -3  16  -8    1.58    0.99
   4 -16   7   -1.76    0.87
  -4  16  -7    0.30    0.90
   5 -16   6    1.29    0.97
  -5  16  -6    1.14    0.87
   6 -16   5    2.32    1.08
  -6  16  -5    0.31    0.89
   7 -16   4    0.31    1.07
  -7  16  -4    0.45    0.91
   8 -16   3    0.05    1.02
  -8  16  -3   -2.24    0.79
   9 -16   2   -2.08    1.12
  -9  16  -2    0.09    0.88
  10 -16   1    1.63    1.28
 -10  16  -1    0.70    0.93
  11 -16   0    0.61    1.28
  12 -16  -1    0.31    1.33
  -8 -15  18   -0.70    1.25
   8  15 -18    0.77    1.19
  -7 -15  17   -0.65    1.15
   7  15 -17   -0.22    1.09
  -6 -15  16   -0.63    1.12
   6  15 -16    0.45    1.15
  -5 -15  15   -0.93    1.03
   5  15 -15   -0.29    1.07
  -4 -15  14    1.24    1.04
   4  15 -14    0.08    1.00
  -3 -15  13    0.27    0.97
   3  15 -13    0.93    0.99
  -2 -15  12    1.90    1.02
   2  15 -12    2.92    1.08
  -1 -15  11   -0.56    0.69
   1  15 -11    0.24    0.96
   0 -15  10   14.53    1.29
   0  15 -10   15.34    1.51
   1 -15   9   -0.64    0.76
  -1  15  -9   -0.35    0.92
   2 -15   8   -0.08    0.82
  -2  15  -8    1.12    0.98
   3 -15   7    2.53    0.97
  -3  15  -7    4.22    1.04
   4 -15   6    0.58    0.93
  -4  15  -6    0.22    0.86
   5 -15   5   -0.58    0.90
  -5  15  -5    0.30    0.87
   6 -15   4    0.63    0.91
  -6  15  -4    2.37    0.85
   7 -15   3   -0.44    1.01
  -7  15  -3   -0.09    0.85
   8 -15   2   -0.88    1.04
  -8  15  -2    0.70    0.90
   9 -15   1    0.86    1.19
  -9  15  -1    0.14    0.88
  10 -15   0   -0.44    1.13
 -10  15   0    1.72    0.95
  11 -15  -1    1.60    1.12
  12 -15  -2   -1.45    1.25
  -8 -14  17   -1.08    1.21
   8  14 -17    0.67    1.15
  -7 -14  16   -0.29    1.15
   7  14 -16    2.64    1.12
  -6 -14  15   -1.12    1.04
   6  14 -15    0.16    1.07
  -5 -14  14    0.76    1.06
   5  14 -14    0.01    1.03
  -4 -14  13    0.45    0.99
   4  14 -13   -0.53    1.01
  -3 -14  12    5.26    1.09
   3  14 -12    6.30    1.14
  -2 -14  11    4.00    1.02
  -2 -14  11    4.95    0.82
   2  14 -11    4.21    1.09
  -1 -14  10    0.37    0.73
   1  14 -10   -0.37    0.93
   0 -14   9   -0.18    0.76
   0  14  -9    2.13    1.02
   1 -14   8    1.09    0.80
  -1  14  -8    2.47    1.02
   2 -14   7    1.22    0.83
  -2  14  -7    1.51    0.86
   3 -14   6    1.87    0.91
  -3  14  -6    0.85    0.90
   4 -14   5    2.11    0.98
  -4  14  -5    0.32    0.88
   5 -14   4    6.29    1.15
  -5  14  -4    5.25    0.98
   6 -14   3    2.97    1.09
  -6  14  -3    4.43    0.99
   7 -14   2    0.08    0.99
  -7  14  -2    1.01    0.83
   8 -14   1    1.05    0.99
  -8  14  -1   -0.28    0.83
   9 -14   0   -1.01    1.06
  -9  14   0    0.73    0.86
  10 -14  -1    1.10    1.17
 -10  14   1    0.80    0.88
  11 -14  -2   -0.89    1.16
  12 -14  -3    1.49    1.32
  13 -14  -4    0.49    1.36
  -9 -13  17    1.11    1.35
   9  13 -17    0.78    1.12
  -8 -13  16    2.48    1.33
   8  13 -16    2.40    1.14
  -7 -13  15    0.06    1.17
   7  13 -15    1.14    1.06
  -6 -13  14    0.91    1.11
   6  13 -14   -0.38    0.98
  -5 -13  13    0.59    1.01
   5  13 -13    0.05    0.97
  -4 -13  12    1.86    1.02
   4  13 -12   -0.33    0.94
  -3 -13  11   12.55    1.34
   3  13 -11   11.44    1.26
  -2 -13  10    2.28    0.76
  -2 -13  10    2.11    0.98
   2  13 -10    3.07    1.00
  -1 -13   9    2.89    0.78
  -1 -13   9    2.48    0.97
   1  13  -9    2.75    0.98
   0 -13   8    0.53    0.73
   0  13  -8   -0.17    0.88
   1 -13   7    5.54    0.92
  -1  13  -7    4.53    1.03
   2 -13   6    0.51    0.78
  -2  13  -6    0.27    0.84
   3 -13   5    2.93    0.92
  -3  13  -5    1.66    0.86
   4 -13   4    4.14    1.02
  -4  13  -4    4.68    0.98
   5 -13   3    0.32    0.93
  -5  13  -3    1.03    0.82
   6 -13   2    0.58    0.91
  -6  13  -2   -0.70    0.78
   7 -13   1   -1.36    0.96
  -7  13  -1   -0.18    0.76
   8 -13   0   -0.20    1.03
  -8  13   0   -0.27    0.80
   9 -13  -1    2.15    1.18
  -9  13   1    2.83    0.91
  10 -13  -2   -1.39    1.03
 -10  13   2   -0.74    0.78
  11 -13  -3   -0.85    1.17
  12 -13  -4    0.28    1.27
  13 -13  -5   -0.63    1.28
 -10 -12  17   -0.31    1.38
  10  12 -17   -0.25    1.05
  -9 -12  16    1.82    1.34
   9  12 -16    3.05    1.17
  -8 -12  15   -1.01    1.16
   8  12 -15   -0.06    0.99
  -7 -12  14    1.64    1.19
   7  12 -14    2.05    1.02
  -6 -12  13    1.20    1.09
   6  12 -13    1.31    0.96
  -5 -12  12    5.27    1.14
   5  12 -12    6.38    1.13
  -4 -12  11    2.91    1.02
   4  12 -11    3.43    1.02
  -3 -12  10    4.89    0.71
  -3 -12  10    4.20    1.10
   3  12 -10    4.98    1.01
  -2 -12   9   23.86    1.70
  -2 -12   9   21.95    1.32
   2  12  -9   23.53    1.59
  -1 -12   8    1.96    0.92
  -1 -12   8    3.80    0.76
   1  12  -8    2.12    0.89
   0 -12   7   -0.31    0.63
   0  12  -7    0.35    0.83
   1 -12   6   -0.62    0.67
  -1  12  -6   -0.16    0.79
   2 -12   5    9.92    1.06
  -2  12  -5    8.78    1.07
   3 -12   4   15.73    1.35
  -3  12  -4   18.69    1.35
   4 -12   3   18.17    1.48
  -4  12  -3   19.51    1.53
   5 -12   2    0.72    0.84
  -5  12  -2    1.81    0.82
   6 -12   1    5.83    1.06
  -6  12  -1    5.41    0.97
   7 -12   0    0.44    0.91
  -7  12   0    0.23    0.80
   8 -12  -1   -0.65    0.99
  -8  12   1    0.93    0.81
   9 -12  -2    1.87    1.09
  -9  12   2    1.16    0.85
  10 -12  -3   -1.24    1.08
 -10  12   3    1.13    0.87
  11 -12  -4    0.37    1.23
  12 -12  -5   -0.38    1.23
  13 -12  -6   -0.17    1.32
 -10 -11  16    1.37    1.30
  10  11 -16    0.44    1.02
  -9 -11  15   -0.63    1.12
   9  11 -15    0.69    1.04
  -8 -11  14    1.40    1.10
   8  11 -14    1.69    0.99
  -7 -11  13    0.06    1.02
   7  11 -13   -0.16    0.87
  -6 -11  12    3.56    1.11
   6  11 -12    4.22    0.97
  -5 -11  11    1.03    1.01
   5  11 -11    2.27    0.95
  -4 -11  10    3.04    0.59
  -4 -11  10    2.59    1.02
   4  11 -10    2.09    0.88
  -3 -11   9    8.35    1.15
  -3 -11   9    8.72    0.81
   3  11  -9    9.47    1.11
  -2 -11   8    9.53    1.14
  -2 -11   8   11.85    0.99
   2  11  -8    9.34    1.03
  -1 -11   7    0.18    0.58
  -1 -11   7    0.33    0.81
   1  11  -7    0.07    0.75
   0 -11   6    5.71    0.78
   0  11  -6    5.62    0.89
   1 -11   5    5.36    0.80
  -1  11  -5    6.80    0.91
   2 -11   4    6.00    0.88
  -2  11  -4    6.09    0.88
   3 -11   3    0.08    0.70
  -3  11  -3    0.01    0.66
   4 -11   2    1.09    0.83
  -4  11  -2    2.67    0.75
   5 -11   1    0.03    0.85
  -5  11  -1    0.31    0.65
   6 -11   0    1.50    0.90
  -6  11   0    1.68    0.73
   7 -11  -1    0.11    0.96
  -7  11   1    0.78    0.72
   8 -11  -2   -0.19    0.99
  -8  11   2    2.12    0.82
   9 -11  -3    1.40    1.07
  -9  11   3    0.13    0.78
  10 -11  -4    0.98    1.12
 -10  11   4    1.58    0.82
  11 -11  -5   -0.68    1.13
  12 -11  -6    1.62    1.27
  13 -11  -7    0.02    1.29
 -11 -10  16    1.13    1.37
  11  10 -16    0.72    1.03
 -10 -10  15    0.70    1.36
  10  10 -15    0.74    0.96
  -9 -10  14    1.48    1.30
   9  10 -14    0.99    0.96
  -8 -10  13    0.33    1.17
   8  10 -13   -0.20    0.87
  -7 -10  12    0.67    0.99
   7  10 -12    1.23    0.90
  -6 -10  11    2.98    1.00
   6  10 -11    2.73    0.90
  -5 -10  10   29.82    2.03
   5  10 -10   29.69    1.76
  -4 -10   9   13.31    1.28
   4  10  -9   15.88    1.33
  -3 -10   8    0.29    0.49
  -3 -10   8    0.30    0.84
   3  10  -8    0.51    0.78
  -2 -10   7    7.35    0.71
  -2 -10   7    5.05    0.87
   2  10  -7    7.21    0.88
  -1 -10   6    1.76    0.77
  -1 -10   6    0.71    0.55
   1  10  -6    0.91    0.69
   0 -10   5   31.65    1.52
   0  10  -5   31.14    1.65
   1 -10   4    6.98    0.82
  -1  10  -4    7.96    0.87
   2 -10   3    4.59    0.77
  -2  10  -3    4.27    0.70
   3 -10   2    0.72    0.68
  -3  10  -2    1.66    0.61
   4 -10   1    3.52    0.87
  -4  10  -1    2.30    0.66
   5 -10   0   -0.75    0.78
  -5  10   0    0.93    0.64
   6 -10  -1    1.90    0.95
  -6  10   1    2.09    0.72
   7 -10  -2    0.77    0.87
  -7  10   2    0.51    0.75
   8 -10  -3   -0.16    0.93
  -8  10   3    0.48    0.76
   9 -10  -4    2.30    1.09
  -9  10   4    1.70    0.77
  10 -10  -5   -0.20    1.05
 -10  10   5   -0.04    0.75
  11 -10  -6    0.78    1.13
  12 -10  -7    0.40    1.19
  13 -10  -8   -1.06    1.29
 -11  -9  15   -0.12    1.41
  11   9 -15   -0.81    0.99
 -10  -9  14    1.23    1.31
  10   9 -14    0.79    0.98
  -9  -9  13    1.00    1.20
   9   9 -13   -0.37    0.85
  -8  -9  12   -0.55    1.08
   8   9 -12    0.13    0.85
  -7  -9  11    1.87    1.06
   7   9 -11    1.19    0.78
  -6  -9  10   -1.55    0.96
   6   9 -10    0.31    0.82
  -5  -9   9   31.07    1.31
  -5  -9   9   32.19    1.95
   5   9  -9   30.55    1.67
  -4  -9   8    0.05    0.84
  -4  -9   8   -0.03    0.13
   4   9  -8   -0.37    0.69
  -3  -9   7    0.27    0.43
  -3  -9   7    0.90    0.80
   3   9  -7   -0.16    0.63
  -2  -9   6    0.22    0.46
  -2  -9   6    0.29    0.72
   2   9  -6    0.24    0.58
  -1  -9   5    0.19    0.48
  -1  -9   5    0.98    0.71
   1   9  -5    0.05    0.61
   0  -9   4   -0.27    0.51
   0   9  -4    0.09    0.55
   1  -9   3   16.49    1.09
  -1   9  -3   16.99    1.16
   2  -9   2    2.57    0.67
  -2   9  -2    2.17    0.62
   3  -9   1    0.87    0.66
  -3   9  -1    0.78    0.56
   4  -9   0   -0.42    0.61
  -4   9   0   -0.13    0.53
   5  -9  -1    1.10    0.81
  -5   9   1    0.47    0.65
   6  -9  -2   -0.11    0.85
  -6   9   2    1.05    0.72
   7  -9  -3   -1.07    0.88
  -7   9   3    0.67    0.74
   8  -9  -4    9.15    1.31
  -8   9   4   12.55    1.16
   9  -9  -5    1.41    1.05
  -9   9   5    0.50    0.70
  10  -9  -6    0.25    1.04
 -10   9   6   -0.26    0.67
  11  -9  -7    1.72    1.17
  12  -9  -8    0.75    1.25
  13  -9  -9   -0.80    1.21
 -12  -8  15    1.66    1.48
  12   8 -15   -0.08    1.03
 -11  -8  14   -0.28    1.33
  11   8 -14    1.72    1.00
 -10  -8  13    1.95    1.31
  10   8 -13    0.70    0.91
  -9  -8  12   -1.54    1.09
   9   8 -12    0.57    0.79
  -8  -8  11    2.04    1.12
   8   8 -11    1.90    0.85
  -7  -8  10   -0.10    0.91
   7   8 -10    0.80    0.79
  -6  -8   9   -0.13    0.87
   6   8  -9   -0.60    0.72
  -5  -8   8    3.28    0.99
   5   8  -8    3.36    0.75
   5   8  -8    3.79    0.64
  -4  -8   7    5.77    0.51
  -4  -8   7    5.31    0.94
   4   8  -7    5.53    0.67
   4   8  -7    5.88    0.75
  -3  -8   6    1.13    0.67
   3   8  -6    1.92    0.53
   3   8  -6    1.27    0.60
  -2  -8   5    0.28    0.30
  -2  -8   5   -0.40    0.39
  -2  -8   5    0.94    0.68
   2   8  -5   -0.81    0.50
   2   8  -5   -0.38    0.43
  -1  -8   4   10.36    0.95
  -1  -8   4   10.91    0.78
   1   8  -4    9.39    0.82
   0  -8   3    0.51    0.49
   0   8  -3    0.71    0.54
   1  -8   2   -0.32    0.50
  -1   8  -2    0.41    0.53
   2  -8   1    0.55    0.53
  -2   8  -1    0.72    0.53
   3  -8   0   10.75    0.93
  -3   8   0   11.35    0.90
   4  -8  -1    2.37    0.74
  -4   8   1    2.00    0.62
   5  -8  -2    1.26    0.76
  -5   8   2    1.60    0.65
   6  -8  -3    0.56    0.82
  -6   8   3    1.28    0.68
   7  -8  -4    0.35    0.82
  -7   8   4    0.17    0.70
   8  -8  -5   11.44    1.33
  -8   8   5    8.70    1.03
   9  -8  -6    3.18    1.10
  -9   8   6    3.45    0.83
  10  -8  -7    1.37    1.07
 -10   8   7    0.59    0.70
  11  -8  -8    1.05    1.13
  12  -8  -9    1.43    1.20
  13  -8 -10   -0.02    1.35
 -13   8  10    1.02    1.15
 -12  -7  14    0.45    1.43
  12   7 -14    0.25    0.96
 -11  -7  13   -1.98    1.08
  11   7 -13   -0.43    0.83
 -10  -7  12    0.95    1.21
  10   7 -12   -0.81    0.81
  -9  -7  11    0.03    1.01
   9   7 -11    0.22    0.74
  -8  -7  10    0.89    1.05
   8   7 -10    1.67    0.78
  -7  -7   9    2.12    1.06
   7   7  -9    2.56    0.76
  -6  -7   8   -1.01    0.88
   6   7  -8   -1.38    0.64
   6   7  -8   -0.70    0.54
  -5  -7   7    6.23    1.05
   5   7  -7   10.08    0.78
   5   7  -7    8.76    0.84
  -4  -7   6    1.01    0.68
  -4  -7   6    1.02    0.29
   4   7  -6    0.77    0.55
   4   7  -6    1.29    0.48
  -3  -7   5    1.23    0.69
  -3  -7   5    1.38    0.32
   3   7  -5    0.96    0.53
   3   7  -5    0.12    0.42
  -2  -7   4    0.17    0.58
  -2  -7   4   -0.34    0.33
  -2  -7   4    0.21    0.30
   2   7  -4    0.68    0.41
   2   7  -4    0.26    0.47
  -1  -7   3   17.68    0.94
  -1  -7   3   17.12    1.22
   1   7  -3   17.95    0.95
   1   7  -3   17.68    1.03
   0  -7   2    1.00    0.46
   0   7  -2    0.54    0.47
   1  -7   1    4.19    0.61
  -1   7  -1    4.45    0.58
   2  -7   0   11.21    0.89
  -2   7   0   10.40    0.89
   3  -7  -1    0.06    0.55
  -3   7   1    0.27    0.45
   4  -7  -2    9.21    0.92
  -4   7   2    9.22    0.83
   5  -7  -3    0.89    0.71
  -5   7   3    0.48    0.57
   6  -7  -4    4.08    0.92
  -6   7   4    3.31    0.71
   7  -7  -5    0.44    0.89
  -7   7   5   -0.24    0.64
   8  -7  -6    5.72    1.12
  -8   7   6    4.20    0.85
   9  -7  -7    0.41    0.99
  -9   7   7    0.99    0.70
  10  -7  -8    0.27    1.04
 -10   7   8    0.23    0.71
  11  -7  -9    0.76    1.07
  12  -7 -10    0.75    1.23
  13  -7 -11   -0.74    1.25
 -13   7  11   -0.94    1.10
 -12  -6  13    0.10    1.38
  12   6 -13    1.75    0.99
 -11  -6  12   -1.36    1.06
  11   6 -12    1.16    0.89
 -10  -6  11    2.20    1.25
  10   6 -11    2.52    0.88
  -9  -6  10    0.22    0.99
   9   6 -10   -0.30    0.73
  -8  -6   9    1.08    1.06
   8   6  -9   -0.20    0.71
  -7  -6   8    0.65    0.96
   7   6  -8    0.16    0.67
  -6  -6   7   -0.80    0.87
   6   6  -7   -0.50    0.60
   6   6  -7   -0.28    0.48
   6   6  -7   -0.90    0.47
  -5  -6   6    7.24    1.01
   5   6  -6    8.94    0.68
   5   6  -6    9.16    0.69
   5   6  -6    7.71    0.72
  -4  -6   5   -0.53    0.68
   4   6  -5    0.08    0.38
   4   6  -5    0.08    0.46
  -3  -6   4    8.06    0.84
   3   6  -4    9.92    0.65
   3   6  -4    8.95    0.69
  -2  -6   3    0.42    0.54
  -2  -6   3    0.62    0.37
   2   6  -3    0.69    0.42
   2   6  -3    1.20    0.38
  -1  -6   2    0.57    0.39
  -1  -6   2   -0.24    0.56
   1   6  -2    0.62    0.44
   1   6  -2    0.97    0.39
   0  -6   1   32.92    1.40
   0   6  -1   31.59    1.39
   0   6  -1   31.10    1.40
   1  -6   0    1.35    0.51
  -1   6   0    0.94    0.45
   2  -6  -1   52.46    2.13
  -2   6   1   51.75    2.11
   3  -6  -2   26.68    1.34
  -3   6   2   26.05    1.37
   4  -6  -3   47.34    2.14
  -4   6   3   48.76    2.08
   5  -6  -4    3.52    0.83
  -5   6   4    4.07    0.70
   6  -6  -5   -0.28    0.77
  -6   6   5   -0.22    0.58
   7  -6  -6   16.39    1.45
  -7   6   6   19.37    1.29
   8  -6  -7   28.32    1.93
  -8   6   7   29.99    1.66
   9  -6  -8    3.28    1.08
  -9   6   8    5.28    0.86
  10  -6  -9    2.08    1.05
 -10   6   9    0.68    0.65
  11  -6 -10    0.67    1.16
  12  -6 -11   -0.87    1.13
  13  -6 -12   -1.54    1.23
 -13   6  12   -0.67    1.16
 -13  -5  13    0.11    1.38
  13   5 -13   -0.21    0.96
 -12  -5  12   -0.85    1.29
  12   5 -12   -0.23    0.92
 -11  -5  11    2.10    1.26
  11   5 -11    0.01    0.87
 -10  -5  10    1.39    1.14
  10   5 -10   -0.37    0.78
  -9  -5   9   -0.50    0.89
   9   5  -9    0.10    0.73
  -8  -5   8   -0.28    1.00
   8   5  -8   -0.09    0.70
  -7  -5   7    5.25    1.10
   7   5  -7    5.57    0.66
   7   5  -7    4.87    0.76
  -6  -5   6    3.25    0.94
   6   5  -6    2.04    0.58
   6   5  -6    3.21    0.51
  -5  -5   5   10.62    1.03
   5   5  -5   11.19    0.77
   5   5  -5   10.44    0.70
  -4  -5   4   -0.17    0.62
   4   5  -4    0.11    0.41
   4   5  -4    0.00    0.31
   4   5  -4    0.08    0.38
  -3  -5   3   18.96    1.17
   3   5  -3   19.29    0.84
   3   5  -3   17.53    0.94
   3   5  -3   17.74    0.86
  -2  -5   2    0.27    0.23
  -2  -5   2   -0.11    0.41
  -2  -5   2   -0.74    0.57
   2   5  -2    0.76    0.32
   2   5  -2    0.31    0.36
  -1  -5   1   31.86    1.56
   1   5  -1   30.94    1.30
   1   5  -1   30.79    1.30
   0  -5   0    1.37    0.46
   0   5   0    1.10    0.45
   0   5   0    1.48    0.43
   1  -5  -1   -0.41    0.48
  -1   5   1    0.17    0.41
   2  -5  -2   11.02    0.93
  -2   5   2   10.78    0.81
   3  -5  -3   81.01    3.09
  -3   5   3   78.52    3.03
   4  -5  -4   24.60    1.35
  -4   5   4   24.92    1.30
   5  -5  -5   12.71    1.10
  -5   5   5   11.99    0.98
   6  -5  -6    2.98    0.88
  -6   5   6    2.49    0.68
   7  -5  -7    1.04    0.91
  -7   5   7    1.77    0.70
   8  -5  -8    4.76    1.08
  -8   5   8    6.51    0.91
   9  -5  -9   14.75    1.49
  -9   5   9   14.16    1.20
  10  -5 -10   -1.01    0.96
  11  -5 -11   -0.59    1.09
  12  -5 -12   -0.61    1.19
 -12   5  12   -1.24    1.03
  13  -5 -13    0.61    1.35
 -13   5  13   -0.46    1.17
 -13  -4  12    0.25    1.37
  13   4 -12    2.86    1.06
 -12  -4  11    0.12    1.11
  12   4 -11    0.84    0.91
 -11  -4  10    0.33    1.18
  11   4 -10    2.58    0.86
 -10  -4   9   -0.12    1.06
  10   4  -9   -0.02    0.75
  -9  -4   8    0.94    0.94
   9   4  -8    0.27    0.71
  -8  -4   7    2.05    1.04
   8   4  -7    0.83    0.67
  -7  -4   6   28.11    1.88
   7   4  -6   24.62    1.22
   7   4  -6   26.25    1.30
  -6  -4   5    0.61    0.79
   6   4  -5    1.00    0.48
   6   4  -5    1.20    0.40
  -5  -4   4    2.75    0.75
   5   4  -4    1.99    0.36
   5   4  -4    2.46    0.42
  -4  -4   3    9.06    0.91
   4   4  -3    9.80    0.53
   4   4  -3    8.77    0.54
  -3  -4   2    0.51    0.56
   3   4  -2    0.24    0.44
   3   4  -2    0.81    0.23
   3   4  -2    0.78    0.27
  -2  -4   1   68.62    2.73
  -2  -4   1   70.49    2.63
   2   4  -1   63.51    2.37
   2   4  -1   67.97    2.38
  -1  -4   0    1.51    0.52
   1   4   0    1.25    0.35
   1   4   0    1.87    0.33
   0  -4  -1   13.90    0.79
   0   4   1   15.63    0.78
   0   4   1   13.01    0.84
   1  -4  -2   -0.19    0.43
  -1   4   2    0.02    0.40
   2  -4  -3    3.93    0.65
  -2   4   3    3.35    0.55
   3  -4  -4    0.92    0.60
  -3   4   4    2.04    0.53
   4  -4  -5   52.12    2.19
  -4   4   5   50.37    2.14
   5  -4  -6    0.81    0.72
  -5   4   6    0.05    0.53
   6  -4  -7    0.53    0.78
  -6   4   7    0.48    0.60
   7  -4  -8    2.90    0.96
  -7   4   8    3.75    0.76
   8  -4  -9    9.68    1.27
  -8   4   9    8.01    0.97
   9  -4 -10    2.88    1.06
  -9   4  10    1.99    0.72
  10  -4 -11   -0.63    1.03
  11  -4 -12   -0.99    1.08
  12  -4 -13    0.60    1.23
 -12   4  13   -0.71    1.06
  13  -4 -14   -3.01    1.20
 -13   4  14   -0.12    1.22
 -13  -3  11    1.77    1.37
  13   3 -11    1.81    1.00
 -12  -3  10    2.94    1.32
  12   3 -10    1.40    0.92
 -11  -3   9    0.47    1.12
  11   3  -9    0.12    0.79
 -10  -3   8    1.08    1.05
  10   3  -8    0.30    0.72
  -9  -3   7    3.59    1.13
   9   3  -7    5.64    0.83
  -8  -3   6    5.32    1.04
   8   3  -6    6.75    0.68
   8   3  -6    5.44    0.77
  -7  -3   5    4.56    0.99
   7   3  -5    3.90    0.51
   7   3  -5    3.80    0.61
  -6  -3   4    1.74    0.71
   6   3  -4    1.80    0.45
   6   3  -4    1.99    0.36
  -5  -3   3    0.07    0.62
   5   3  -3    1.01    0.28
   5   3  -3    0.54    0.32
  -4  -3   2    0.15    0.50
  -3  -3   1   10.39    0.89
   3   3  -1    9.97    0.88
  -2  -3   0   -0.11    0.49
  -2  -3   0    0.93    0.57
   2   3   0   -0.28    0.49
   2   3   0    0.59    0.22
   2   3   0    0.77    0.21
  -1  -3  -1   17.19    1.15
   1   3   1   18.31    0.79
   1   3   1   17.45    0.81
   0  -3  -2   24.08    1.05
   0   3   2   23.33    1.07
   0   3   2   23.07    1.03
   1  -3  -3   -0.03    0.48
  -1   3   3    0.50    0.36
   2  -3  -4   33.33    1.49
  -2   3   4   32.99    1.47
   3  -3  -5   41.17    1.79
  -3   3   5   40.96    1.76
   4  -3  -6    6.65    0.80
  -4   3   6    8.67    0.79
   5  -3  -7   -0.91    0.59
  -5   3   7    0.27    0.53
   6  -3  -8    8.59    1.09
  -6   3   8   10.10    0.92
   7  -3  -9    1.95    0.95
  -7   3   9    1.35    0.66
   8  -3 -10    2.52    1.06
  -8   3  10    4.41    0.78
   9  -3 -11    0.87    0.98
  -9   3  11    2.02    0.70
  10  -3 -12    0.79    1.07
  11  -3 -13   -0.11    1.14
 -11   3  13    0.39    0.98
  12  -3 -14   -2.99    1.13
 -12   3  14    0.37    1.17
  13  -3 -15    0.49    1.38
 -13   3  15   -0.29    1.22
 -14  -2  11   -0.58    1.31
  14   2 -11    2.31    1.10
 -13  -2  10    1.83    1.32
  13   2 -10    1.37    0.97
 -12  -2   9    1.65    1.21
  12   2  -9    0.45    0.87
 -11  -2   8    1.94    1.20
  11   2  -8    4.71    0.91
 -10  -2   7    1.51    1.06
  10   2  -7    0.96    0.74
  -9  -2   6    4.91    1.12
   9   2  -6    4.96    0.79
  -8  -2   5   -0.08    0.88
   8   2  -5    0.88    0.62
   8   2  -5   -0.66    0.46
  -7  -2   4    0.94    0.82
   7   2  -4    1.27    0.50
   7   2  -4    1.91    0.43
  -6  -2   3    2.61    0.69
   6   2  -3    3.58    0.40
   6   2  -3    3.81    0.45
  -5  -2   2   -0.23    0.58
   5   2  -2   -0.06    0.24
   5   2  -2   -0.14    0.22
  -4  -2   1    8.82    0.81
  -3  -2   0    0.07    0.51
  -2  -2  -1    2.68    0.56
   2   2   1    4.01    0.31
   2   2   1    2.79    0.58
   2   2   1    3.32    0.28
  -1  -2  -2   24.85    1.29
   1   2   2   25.21    1.29
   1   2   2   22.97    0.99
   1   2   2   24.04    1.01
   0  -2  -3  293.81   10.19
   0   2   3  302.41   10.21
   0   2   3  297.75   10.19
   1  -2  -4   30.56    1.41
  -1   2   4   31.64    1.36
   2  -2  -5    0.65    0.58
  -2   2   5    1.17    0.49
   3  -2  -6    1.94    0.60
  -3   2   6    2.11    0.53
   4  -2  -7    3.45    0.71
  -4   2   7    4.11    0.63
   5  -2  -8    1.03    0.75
  -5   2   8    0.96    0.55
   6  -2  -9    2.29    0.91
  -6   2   9    2.85    0.66
   7  -2 -10    4.46    1.04
  -7   2  10    4.11    0.77
   8  -2 -11    1.46    0.99
  -8   2  11   -0.26    0.61
   9  -2 -12    1.01    1.04
  -9   2  12    1.14    0.71
  10  -2 -13   -1.18    1.04
[truncated: 600,392 more chars]
